# Supplementary material for: Ferulic acid in synergy with retinol alleviates oxidative injury of HaCaT cells during UVB-induced photoaging
Source: Aging (Albany NY). 2024 Apr 18;16(8):7153–73. doi: 10.18632/aging.205749 (PMC11087097; doi:10.18632/aging.205749)
Supplement: Supplementary Table 1 [file aging-16-205749-s001.xlsx]

## Sheet: Sheet1
Supplementary Table 1. Targets of retinol.
	UNIPROT	ENTREZID	GENENAME	SYMBOL
1	O43318	6885	mitogen-activated protein kinase kinase kinase 7	MAP3K7
2	P22301	3586	interleukin 10	IL10
3	P01375	7124	tumor necrosis factor	TNF
4	P17535	3727	JunD proto-oncogene, AP-1 transcription factor subunit	JUND
5	P04040	847	catalase	CAT
6	A0A140VJC8	351	amyloid beta precursor protein	APP
7	P36383	10052	gap junction protein gamma 1	GJC1
8	P04798	1543	cytochrome P450 family 1 subfamily A member 1	CYP1A1
9	P41159	3952	leptin	LEP
10	P15502	2006	elastin	ELN
11	P21549	189	alanine--glyoxylate and serine--pyruvate aminotransferase	AGXT
12	P04746	279	amylase alpha 2A	AMY2A
13	P22735	7051	transglutaminase 1	TGM1
14	P78540	384	arginase 2	ARG2
15	P10253	2548	alpha glucosidase	GAA
16	Q9BYE2	84000	transmembrane serine protease 13	TMPRSS13
17	P06276	590	butyrylcholinesterase	BCHE
18	P63096	2770	G protein subunit alpha i1	GNAI1
19	O76093	8817	fibroblast growth factor 18	FGF18
20	Q14749	27232	glycine N-methyltransferase	GNMT
21	O75019	11024	leukocyte immunoglobulin like receptor A1	LILRA1
22	Q9UIG4	170680	psoriasis susceptibility 1 candidate 2	PSORS1C2
23	P05090	347	apolipoprotein D	APOD
24	P41222	5730	prostaglandin D2 synthase	PTGDS
25	Q96NR8	145226	retinol dehydrogenase 12	RDH12
26	Q92781	5959	retinol dehydrogenase 5	RDH5
27	Q8NBN7	112724	retinol dehydrogenase 13	RDH13
28	O94788	8854	aldehyde dehydrogenase 1 family member A2	ALDH1A2
29	O95237	9227	lecithin retinol acyltransferase	LRAT
30	O75911	9249	dehydrogenase/reductase 3	DHRS3
31	P47895	220	aldehyde dehydrogenase 1 family member A3	ALDH1A3
32	Q6NUM9	54884	retinol saturase	RETSAT
33	Q8TC12	51109	retinol dehydrogenase 11	RDH11
34	Q9BTZ2	10901	dehydrogenase/reductase 4	DHRS4
35	Q9HBH5	57665	retinol dehydrogenase 14	RDH14
36	Q9NYR8	50700	retinol dehydrogenase 8	RDH8
37	P02753	5950	retinol binding protein 4	RBP4
38	P18089	151	adrenoceptor alpha 2B	ADRA2B
39	P35398	6095	RAR related orphan receptor A	RORA
40	P10276	5914	retinoic acid receptor alpha	RARA
41	P10826	5915	retinoic acid receptor beta	RARB
42	P13631	5916	retinoic acid receptor gamma	RARG
43	P19793	6256	retinoid X receptor alpha	RXRA
44	P28702	6257	retinoid X receptor beta	RXRB
45	P48443	6258	retinoid X receptor gamma	RXRG
46	P28845	3290	hydroxysteroid 11-beta dehydrogenase 1	HSD11B1
47	P0DMS8	140	adenosine A3 receptor	ADORA3
48	P10275	367	androgen receptor	AR
49	P32246	1230	C-C motif chemokine receptor 1	CCR1
50	P21730	728	complement C5a receptor 1	C5AR1
51	P21554	1268	cannabinoid receptor 1	CNR1
52	P11511	1588	cytochrome P450 family 19 subfamily A member 1	CYP19A1
53	P30304	993	cell division cycle 25A	CDC25A
54	P34913	2053	epoxide hydrolase 2	EPHX2
55	P03372	2099	estrogen receptor 1	ESR1
56	Q92731	2100	estrogen receptor 2	ESR2
57	P49810	5664	presenilin 2	PSEN2
58	P47871	2642	glucagon receptor	GCGR
59	Q12809	3757	potassium voltage-gated channel subfamily H member 2	KCNH2
60	P28482	5594	mitogen-activated protein kinase 1	MAPK1
61	Q16539	1432	mitogen-activated protein kinase 14	MAPK14
62	P11229	1128	cholinergic receptor muscarinic 1	CHRM1
63	P20309	1131	cholinergic receptor muscarinic 3	CHRM3
64	P08173	1132	cholinergic receptor muscarinic 4	CHRM4
65	P08912	1133	cholinergic receptor muscarinic 5	CHRM5
66	P51449	6097	RAR related orphan receptor C	RORC
67	Q05655	5580	protein kinase C delta	PRKCD
68	P18031	5770	protein tyrosine phosphatase non-receptor type 1	PTPN1
69	P41595	3357	5-hydroxytryptamine receptor 2B	HTR2B
72	P34972	1269	cannabinoid receptor 2	CNR2
73	Q13133	10062	nuclear receptor subfamily 1 group H member 3	NR1H3
74	Q01959	6531	solute carrier family 6 member 3	SLC6A3
75	Q15722	1241	leukotriene B4 receptor	LTB4R
76	P35557	2645	glucokinase	GCK
77	O75582	9252	ribosomal protein S6 kinase A5	RPS6KA5
78	P49841	2932	glycogen synthase kinase 3 beta	GSK3B
79	P25116	2149	coagulation factor II thrombin receptor	F2R
80	P56817	23621	beta-secretase 1	BACE1
81	P55055	7376	nuclear receptor subfamily 1 group H member 2	NR1H2
82	P04062	2629	glucosylceramidase beta	GBA
83	P22303	43	acetylcholinesterase (Cartwright blood group)	ACHE
84	O75762	8989	transient receptor potential cation channel subfamily A member 1	TRPA1
85	P08185	866	serpin family A member 6	SERPINA6
86	P11413	2539	glucose-6-phosphate dehydrogenase	G6PD
87	P11712	1559	cytochrome P450 family 2 subfamily C member 9	CYP2C9
88	P08684	1576	cytochrome P450 family 3 subfamily A member 4	CYP3A4
89	Q9UBS5	2550	gamma-aminobutyric acid type B receptor subunit 1	GABBR1
90	O15055	8864	period circadian regulator 2	PER2
91	O60674	3717	Janus kinase 2	JAK2
92	P22001	3738	potassium voltage-gated channel subfamily A member 3	KCNA3
93	P50416	1374	carnitine palmitoyltransferase 1A	CPT1A
94	Q13093	7941	phospholipase A2 group VII	PLA2G7
95	P42330	8644	aldo-keto reductase family 1 member C3	AKR1C3
96	P08069	3480	insulin like growth factor 1 receptor	IGF1R
97	P06737	5836	glycogen phosphorylase L	PYGL
98	P12931	6714	SRC proto-oncogene, non-receptor tyrosine kinase	SRC
99	P35968	3791	kinase insert domain receptor	KDR
100	P49146	4887	neuropeptide Y receptor Y2	NPY2R
101	Q9UM73	238	ALK receptor tyrosine kinase	ALK
102	P00533	1956	epidermal growth factor receptor	EGFR
103	Q9Y5Z0	25825	beta-secretase 2	BACE2
104	O00408	5138	phosphodiesterase 2A	PDE2A
105	P05129	5582	protein kinase C gamma	PRKCG
106	P05771	5579	protein kinase C beta	PRKCB
107	Q02156	5581	protein kinase C epsilon	PRKCE
108	P24723	5583	protein kinase C eta	PRKCH
109	Q04759	5588	protein kinase C theta	PRKCQ
110	Q9Y233	10846	phosphodiesterase 10A	PDE10A
111	P35354	5743	prostaglandin-endoperoxide synthase 2	PTGS2
112	Q99720	10280	sigma non-opioid intracellular receptor 1	SIGMAR1
113	Q14416	2912	glutamate metabotropic receptor 2	GRM2
114	P50579	10988	methionyl aminopeptidase 2	METAP2
115	P35372	4988	opioid receptor mu 1	OPRM1
116	P41145	4986	opioid receptor kappa 1	OPRK1
117	P22460	3741	potassium voltage-gated channel subfamily A member 5	KCNA5
118	Q99685	11343	monoglyceride lipase	MGLL
119	P07333	1436	colony stimulating factor 1 receptor	CSF1R
120	P48067	6536	solute carrier family 6 member 9	SLC6A9
121	P05067	351	amyloid beta precursor protein	APP
122	P25103	6869	tachykinin receptor 1	TACR1
123	Q00987	4193	MDM2 proto-oncogene	MDM2
124	P80365	3291	hydroxysteroid 11-beta dehydrogenase 2	HSD11B2
125	P32247	680	bombesin receptor subtype 3	BRS3
126	P24557	6916	thromboxane A synthase 1	TBXAS1
127	P14416	1813	dopamine receptor D2	DRD2
128	P20292	241	arachidonate 5-lipoxygenase activating protein	ALOX5AP
129	P30518	554	arginine vasopressin receptor 2	AVPR2
130	P37288	552	arginine vasopressin receptor 1A	AVPR1A
131	P52333	3718	Janus kinase 3	JAK3
132	P30559	5021	oxytocin receptor	OXTR
133	P10721	3815	KIT proto-oncogene, receptor tyrosine kinase	KIT
134	P15104	2752	glutamate-ammonia ligase	GLUL
135	P10827	7067	thyroid hormone receptor alpha	THRA
136	Q05469	3991	lipase E, hormone sensitive type	LIPE
