# Supplementary material for: Ferulic acid in synergy with retinol alleviates oxidative injury of HaCaT cells during UVB-induced photoaging
Source: Aging (Albany NY). 2024 Apr 18;16(8):7153–73. doi: 10.18632/aging.205749 (PMC11087097; doi:10.18632/aging.205749)
Supplement: Supplementary Table 2 [file aging-16-205749-s002.xlsx]

## Sheet: Sheet1
Supplementary Table 2. Targets of ferulic acid.
	UNIPROT	ENTREZID	GENENAME	SYMBOL
1	P23219	5742	prostaglandin-endoperoxide synthase 1	PTGS1
2	P35354	5743	prostaglandin-endoperoxide synthase 2	PTGS2
3	P29474	4846	nitric oxide synthase 3	NOS3
4	P23975	6530	solute carrier family 6 member 2	SLC6A2
5	P25100	146	adrenoceptor alpha 1D	ADRA1D
6	Q01959	6531	solute carrier family 6 member 3	SLC6A3
7	P07550	154	adrenoceptor beta 2	ADRB2
8	P09960	4048	leukotriene A4 hydrolase	LTA4H
9	P21397	4128	monoamine oxidase A	MAOA
10	P17538	1504	chymotrypsinogen B1	CTRB1
11	P17612	5566	protein kinase cAMP-activated catalytic subunit alpha	PRKACA
12	P18089	151	adrenoceptor alpha 2B	ADRA2B
13	P00749	5328	plasminogen activator, urokinase	PLAU
14	P08238	3326	heat shock protein 90 alpha family class B member 1	HSP90AB1
15	P00918	760	carbonic anhydrase 2	CA2
16	P43166	766	carbonic anhydrase 7	CA7
17	P00915	759	carbonic anhydrase 1	CA1
18	P23280	765	carbonic anhydrase 6	CA6
19	O43570	771	carbonic anhydrase 12	CA12
20	Q9ULX7	23632	carbonic anhydrase 14	CA14
21	Q16790	768	carbonic anhydrase 9	CA9
22	P35218	763	carbonic anhydrase 5A	CA5A
23	Q9Y2D0	11238	carbonic anhydrase 5B	CA5B
24	P27338	4129	monoamine oxidase B	MAOB
25	P15121	231	aldo-keto reductase family 1 member B	AKR1B1
26	P09917	240	arachidonate 5-lipoxygenase	ALOX5
27	P14780	4318	matrix metallopeptidase 9	MMP9
28	P03956	4312	matrix metallopeptidase 1	MMP1
29	P08253	4313	matrix metallopeptidase 2	MMP2
30	P18031	5770	protein tyrosine phosphatase non-receptor type 1	PTPN1
31	Q8N1Q1	377677	carbonic anhydrase 13	CA13
32	P07451	761	carbonic anhydrase 3	CA3
33	P05067	351	amyloid beta precursor protein	APP
34	Q16236	4780	NFE2 like bZIP transcription factor 2	NFE2L2
35	P40763	6774	signal transducer and activator of transcription 3	STAT3
36	P28845	3290	hydroxysteroid 11-beta dehydrogenase 1	HSD11B1
37	Q92731	2100	estrogen receptor 2	ESR2
38	P22748	762	carbonic anhydrase 4	CA4
39	O00206	7099	toll like receptor 4	TLR4
40	P08581	4233	MET proto-oncogene, receptor tyrosine kinase	MET
41	P04798	1543	cytochrome P450 family 1 subfamily A member 1	CYP1A1
42	P05177	1544	cytochrome P450 family 1 subfamily A member 2	CYP1A2
43	P16083	4835	N-ribosyldihydronicotinamide:quinone reductase 2	NQO2
44	Q16678	1545	cytochrome P450 family 1 subfamily B member 1	CYP1B1
45	P15085	1357	carboxypeptidase A1	CPA1
46	P00533	1956	epidermal growth factor receptor	EGFR
47	P02766	7276	transthyretin	TTR
48	B2RXH2	390245	lysine demethylase 4E	KDM4E
49	Q9Y4C1	55818	lysine demethylase 3A	KDM3A
50	O15054	23135	lysine demethylase 6B	KDM6B
51	Q9C0B1	79068	FTO alpha-ketoglutarate dependent dioxygenase	FTO
52	O75164	9682	lysine demethylase 4A	KDM4A
53	Q9H3R0	23081	lysine demethylase 4C	KDM4C
54	Q9H4B7	81027	tubulin beta 1 class VI	TUBB1
55	Q04206	5970	RELA proto-oncogene, NF-kB subunit	RELA
56	P06241	2534	FYN proto-oncogene, Src family tyrosine kinase	FYN
57	P06239	3932	LCK proto-oncogene, Src family tyrosine kinase	LCK
58	P53985	6566	solute carrier family 16 member 1	SLC16A1
59	Q9NR96	54106	toll like receptor 9	TLR9
60	O60218	57016	aldo-keto reductase family 1 member B10	AKR1B10
61	P16050	246	arachidonate 15-lipoxygenase	ALOX15
62	Q02156	5581	protein kinase C epsilon	PRKCE
63	P13726	2152	coagulation factor III, tissue factor	F3
64	P35228	4843	nitric oxide synthase 2	NOS2
65	P08138	4804	nerve growth factor receptor	NGFR
66	P11802	1019	cyclin dependent kinase 4	CDK4
67	Q13509	10381	tubulin beta 3 class III	TUBB3
68	P08183	5243	ATP binding cassette subfamily B member 1	ABCB1
69	P09467	2203	fructose-bisphosphatase 1	FBP1
70	P11388	7153	DNA topoisomerase II alpha	TOP2A
71	Q04760	2739	glyoxalase I	GLO1
72	P56817	23621	beta-secretase 1	BACE1
73	P12821	1636	angiotensin I converting enzyme	ACE
74	P00797	5972	renin	REN
75	P09874	142	poly(ADP-ribose) polymerase 1	PARP1
76	P35869	196	aryl hydrocarbon receptor	AHR
77	Q9Y2K7	22992	lysine demethylase 2A	KDM2A
78	P51580	7172	thiopurine S-methyltransferase	TPMT
79	P35222	1499	catenin beta 1	CTNNB1
80	P00734	2147	coagulation factor II, thrombin	F2
81	Q86YT5	284111	solute carrier family 13 member 5	SLC13A5
84	P42892	1889	endothelin converting enzyme 1	ECE1
85	O15229	8564	kynurenine 3-monooxygenase	KMO
87	Q01432	272	adenosine monophosphate deaminase 3	AMPD3
88	Q9Y5Y4	11251	prostaglandin D2 receptor 2	PTGDR2
89	P08473	4311	membrane metalloendopeptidase	MME
90	P45983	5599	mitogen-activated protein kinase 8	MAPK8
91	P17516	1109	aldo-keto reductase family 1 member C4	AKR1C4
92	P53396	47	ATP citrate lyase	ACLY
93	P23919	1841	deoxythymidylate kinase	DTYMK
94	O60502	10724	O-GlcNAcase	OGA
95	P42330	8644	aldo-keto reductase family 1 member C3	AKR1C3
96	P14174	4282	macrophage migration inhibitory factor	MIF
97	P14920	1610	D-amino acid oxidase	DAO
98	Q9Y463	9149	dual specificity tyrosine phosphorylation regulated kinase 1B	DYRK1B
99	P17706	5771	protein tyrosine phosphatase non-receptor type 2	PTPN2
100	P06737	5836	glycogen phosphorylase L	PYGL
101	P11217	5837	glycogen phosphorylase, muscle associated	PYGM
102	P00813	100	adenosine deaminase	ADA
103	P49841	2932	glycogen synthase kinase 3 beta	GSK3B
104	P25101	1909	endothelin receptor type A	EDNRA
105	P05186	249	alkaline phosphatase, biomineralization associated	ALPL
106	P10636	4137	microtubule associated protein tau	MAPT
107	Q9NPH5	50507	NADPH oxidase 4	NOX4
108	Q96RR4	10645	calcium/calmodulin dependent protein kinase kinase 2	CAMKK2
109	Q9UNQ0	9429	ATP binding cassette subfamily G member 2 (Junior blood group)	ABCG2
110	P17936	3486	insulin like growth factor binding protein 3	IGFBP3
