# Supplementary material for: Ferulic acid in synergy with retinol alleviates oxidative injury of HaCaT cells during UVB-induced photoaging
Source: Aging (Albany NY). 2024 Apr 18;16(8):7153–73. doi: 10.18632/aging.205749 (PMC11087097; doi:10.18632/aging.205749)
Supplement: Supplementary Table 3 [file aging-16-205749-s003.xlsx]

## Sheet: Sheet1
Supplementary Table 3. Targets of skin aging.
	ENTREZID	UNIPROT	GENENAME	SYMBOL
1	4312	B4DN15	matrix metallopeptidase 1	MMP1
2	4312	P03956	matrix metallopeptidase 1	MMP1
3	4312	Q53G95	matrix metallopeptidase 1	MMP1
4	2006	P15502	elastin	ELN
5	2006	B4E3S4	elastin	ELN
6	2006	E7ENM0	elastin	ELN
7	2006	G5E950	elastin	ELN
8	2006	Q8NBI4	elastin	ELN
9	2006	G3V0G6	elastin	ELN
10	2006	Q6ZUN2	elastin	ELN
11	2006	E7EN65	elastin	ELN
12	2006	Q59H17	elastin	ELN
13	2006	B3KRT8	elastin	ELN
14	2006	F8WAH6	elastin	ELN
15	8724	O60493	sorting nexin 3	SNX3
16	4015	B7ZAJ4	lysyl oxidase	LOX
17	4015	B0AZT2	lysyl oxidase	LOX
18	4015	D0PNI2	lysyl oxidase	LOX
19	4015	P28300	lysyl oxidase	LOX
20	7048	D2JYI1	transforming growth factor beta receptor 2	TGFBR2
21	7048	P37173	transforming growth factor beta receptor 2	TGFBR2
22	7048	A3QNQ0	transforming growth factor beta receptor 2	TGFBR2
23	4157	Q01726	melanocortin 1 receptor	MC1R
24	4157	Q1JUL4	melanocortin 1 receptor	MC1R
25	2200	P35555	fibrillin 1	FBN1
26	6657	A0A0U3FYV6	SRY-box transcription factor 2	SOX2
27	6657	P48431	SRY-box transcription factor 2	SOX2
28	4087	Q15796	SMAD family member 2	SMAD2
29	4087	Q53XR6	SMAD family member 2	SMAD2
30	4087	B7Z5N5	SMAD family member 2	SMAD2
31	4092	O15105	SMAD family member 7	SMAD7
32	4092	B3KYA8	SMAD family member 7	SMAD7
33	3479	P05019	insulin like growth factor 1	IGF1
34	3479	Q59GC5	insulin like growth factor 1	IGF1
35	3479	Q5U743	insulin like growth factor 1	IGF1
36	3479	Q13429	insulin like growth factor 1	IGF1
37	5468	E9PFX5	peroxisome proliferator activated receptor gamma	PPARG
38	5468	Q4W448	peroxisome proliferator activated receptor gamma	PPARG
39	5468	D2KUA6	peroxisome proliferator activated receptor gamma	PPARG
40	5468	P37231	peroxisome proliferator activated receptor gamma	PPARG
41	3868	P08779	keratin 16	KRT16
42	1464	Q6UVK1	chondroitin sulfate proteoglycan 4	CSPG4
43	2100	F1D8N3	estrogen receptor 2	ESR2
44	2100	Q92731	estrogen receptor 2	ESR2
45	2100	Q0PTK2	estrogen receptor 2	ESR2
46	2100	Q7LCB3	estrogen receptor 2	ESR2
47	1382	P29373	cellular retinoic acid binding protein 2	CRABP2
48	9759	P56524	histone deacetylase 4	HDAC4
49	7431	P08670	vimentin	VIM
50	7431	V9HWE1	vimentin	VIM
51	362	P55064	aquaporin 5	AQP5
52	7076	P01033	TIMP metallopeptidase inhibitor 1	TIMP1
53	7076	Q6FGX5	TIMP metallopeptidase inhibitor 1	TIMP1
54	7076	B4DJK3	TIMP metallopeptidase inhibitor 1	TIMP1
55	3872	Q04695	keratin 17	KRT17
56	3872	Q14666	keratin 17	KRT17
57	2852	A0A024R849	G protein-coupled estrogen receptor 1	GPER1
58	2852	Q63ZY2	G protein-coupled estrogen receptor 1	GPER1
59	2852	Q99527	G protein-coupled estrogen receptor 1	GPER1
60	5728	F6KD01	phosphatase and tensin homolog	PTEN
61	5728	P60484	phosphatase and tensin homolog	PTEN
62	3371	B4E1W8	tenascin C	TNC
63	3371	P24821	tenascin C	TNC
64	3371	Q4LE33	tenascin C	TNC
65	3371	J3QSU6	tenascin C	TNC
66	10631	A0A024RDT5	periostin	POSTN
67	10631	Q15063	periostin	POSTN
68	10631	B1ALD9	periostin	POSTN
69	10631	A0A024RDS2	periostin	POSTN
70	1545	Q16678	cytochrome P450 family 1 subfamily B member 1	CYP1B1
71	1545	Q53TK1	cytochrome P450 family 1 subfamily B member 1	CYP1B1
72	2247	A0A087WUF6	fibroblast growth factor 2	FGF2
73	2247	P09038	fibroblast growth factor 2	FGF2
74	10252	O43609	sprouty RTK signaling antagonist 1	SPRY1
75	4239	A0A024QZ34	microfibril associated protein 4	MFAP4
76	4239	P55083	microfibril associated protein 4	MFAP4
77	10062	Q13133	nuclear receptor subfamily 1 group H member 3	NR1H3
78	10062	B4DXU5	nuclear receptor subfamily 1 group H member 3	NR1H3
79	10062	F1D8N1	nuclear receptor subfamily 1 group H member 3	NR1H3
80	10062	B5MBY7	nuclear receptor subfamily 1 group H member 3	NR1H3
81	5478	P62937	peptidylprolyl isomerase A	PPIA
82	5478	V9HWF5	peptidylprolyl isomerase A	PPIA
83	682	P35613	basigin (Ok blood group)	BSG
84	682	Q54A51	basigin (Ok blood group)	BSG
85	4311	P08473	membrane metalloendopeptidase	MME
86	71	P63261	actin gamma 1	ACTG1
87	857	A0A024R757	caveolin 1	CAV1
88	857	Q2TNI1	caveolin 1	CAV1
89	857	Q59E85	caveolin 1	CAV1
90	857	Q7Z4F3	caveolin 1	CAV1
91	857	A9XTE5	caveolin 1	CAV1
92	857	Q03135	caveolin 1	CAV1
93	10376	P68363	tubulin alpha 1b	TUBA1B
94	3688	P05556	integrin subunit beta 1	ITGB1
95	3037	Q92819	hyaluronan synthase 2	HAS2
96	4314	P08254	matrix metallopeptidase 3	MMP3
97	5610	P19525	eukaryotic translation initiation factor 2 alpha kinase 2	EIF2AK2
98	5610	Q8IW76	eukaryotic translation initiation factor 2 alpha kinase 2	EIF2AK2
99	1136	P32297	cholinergic receptor nicotinic alpha 3 subunit	CHRNA3
100	3662	Q15306	interferon regulatory factor 4	IRF4
101	4016	Q08397	lysyl oxidase like 1	LOXL1
102	54796	Q5H9S4	basonuclin 2	BNC2
103	54796	B4DR27	basonuclin 2	BNC2
104	54796	Q6ZN30	basonuclin 2	BNC2
105	948	A4D1B1	CD36 molecule	CD36
106	948	P16671	CD36 molecule	CD36
107	948	B7Z6C3	CD36 molecule	CD36
108	948	E9PLT1	CD36 molecule	CD36
109	4318	P14780	matrix metallopeptidase 9	MMP9
110	3491	O00622	cellular communication network factor 1	CCN1
111	3491	Q6FI18	cellular communication network factor 1	CCN1
112	8626	Q9H3D4	tumor protein p63	TP63
113	8626	C9D7D0	tumor protein p63	TP63
114	8626	B7Z8X6	tumor protein p63	TP63
115	8626	A0A0S2Z4N6	tumor protein p63	TP63
116	8626	A0A141PNN3	tumor protein p63	TP63
117	8626	A0A141PNN4	tumor protein p63	TP63
118	8626	A0A0S2Z4N5	tumor protein p63	TP63
119	5176	A0A140VKF3	serpin family F member 1	SERPINF1
120	5176	P36955	serpin family F member 1	SERPINF1
121	7157	K7PPA8	tumor protein p53	TP53
122	7157	P04637	tumor protein p53	TP53
123	7157	Q53GA5	tumor protein p53	TP53
124	7157	H2EHT1	tumor protein p53	TP53
125	7157	A0A087X1Q1	tumor protein p53	TP53
126	7157	A0A087WXZ1	tumor protein p53	TP53
127	7157	A0A087WT22	tumor protein p53	TP53
128	847	P04040	catalase	CAT
129	2043	A0A024R452	EPH receptor A4	EPHA4
130	2043	P54764	EPH receptor A4	EPHA4
131	3984	P53667	LIM domain kinase 1	LIMK1
132	5587	F8WBA3	protein kinase D1	PRKD1
133	5587	Q15139	protein kinase D1	PRKD1
134	779	Q13698	calcium voltage-gated channel subunit alpha1 S	CACNA1S
135	779	B1ALM3	calcium voltage-gated channel subunit alpha1 S	CACNA1S
136	2175	O15360	FA complementation group A	FANCA
137	4214	Q13233	mitogen-activated protein kinase kinase kinase 1	MAP3K1
138	410	A0A0C4DFZ2	arylsulfatase A	ARSA
139	410	B4DVI5	arylsulfatase A	ARSA
140	410	P15289	arylsulfatase A	ARSA
141	717	P06681	complement C2	C2
142	717	Q53HP3	complement C2	C2
143	717	Q5JP69	complement C2	C2
144	717	B4DQI1	complement C2	C2
145	717	A0A0G2JL69	complement C2	C2
146	717	B4DV48	complement C2	C2
147	717	Q8N6L6	complement C2	C2
148	5598	A0A024QZ20	mitogen-activated protein kinase 7	MAPK7
149	5598	Q13164	mitogen-activated protein kinase 7	MAPK7
150	5618	P16471	prolactin receptor	PRLR
151	5795	Q12913	protein tyrosine phosphatase receptor type J	PTPRJ
152	5795	Q9NPR5	protein tyrosine phosphatase receptor type J	PTPRJ
153	5903	P49792	RAN binding protein 2	RANBP2
154	387	A0A024R324	ras homolog family member A	RHOA
155	387	P61586	ras homolog family member A	RHOA
156	387	C9JX21	ras homolog family member A	RHOA
157	387	B4DKN9	ras homolog family member A	RHOA
158	387	C9JRM1	ras homolog family member A	RHOA
159	387	Q9BVT0	ras homolog family member A	RHOA
160	6584	O76082	solute carrier family 22 member 5	SLC22A5
161	7139	P45379	troponin T2, cardiac type	TNNT2
162	7139	A0A0A0MRJ5	troponin T2, cardiac type	TNNT2
163	7139	Q15607	troponin T2, cardiac type	TNNT2
164	1743	B7Z6J1	dihydrolipoamide S-succinyltransferase	DLST
165	1743	A0A024R6C9	dihydrolipoamide S-succinyltransferase	DLST
166	1743	P36957	dihydrolipoamide S-succinyltransferase	DLST
167	2255	O15520	fibroblast growth factor 10	FGF10
168	3105	P30443	major histocompatibility complex, class I, A	HLA-A
169	3105	Q5SUL5	major histocompatibility complex, class I, A	HLA-A
170	3105	B1PKY1	major histocompatibility complex, class I, A	HLA-A
171	3105	B2R7U3	major histocompatibility complex, class I, A	HLA-A
172	3105	P04439	major histocompatibility complex, class I, A	HLA-A
173	4629	P35749	myosin heavy chain 11	MYH11
174	4629	A0A024QZJ4	myosin heavy chain 11	MYH11
175	4629	A0A024QZJ6	myosin heavy chain 11	MYH11
176	4722	O75489	NADH:ubiquinone oxidoreductase core subunit S3	NDUFS3
177	8974	O15460	prolyl 4-hydroxylase subunit alpha 2	P4HA2
178	8974	Q05DA4	prolyl 4-hydroxylase subunit alpha 2	P4HA2
179	5077	P23760	paired box 3	PAX3
180	5077	A0A024R470	paired box 3	PAX3
181	5286	L7RRS0	phosphatidylinositol-4-phosphate 3-kinase catalytic subunit type 2 alpha	PIK3C2A
182	5286	O00443	phosphatidylinositol-4-phosphate 3-kinase catalytic subunit type 2 alpha	PIK3C2A
183	5286	B4DG55	phosphatidylinositol-4-phosphate 3-kinase catalytic subunit type 2 alpha	PIK3C2A
184	860	Q13950	RUNX family transcription factor 2	RUNX2
185	860	A0A0D9SEN7	RUNX family transcription factor 2	RUNX2
186	860	Q32MY8	RUNX family transcription factor 2	RUNX2
187	10507	Q92854	semaphorin 4D	SEMA4D
188	7227	Q9UHF7	transcriptional repressor GATA binding 1	TRPS1
189	2202	A0A0S2Z4F1	EGF containing fibulin extracellular matrix protein 1	EFEMP1
190	2202	B2R6M6	EGF containing fibulin extracellular matrix protein 1	EFEMP1
191	2202	Q12805	EGF containing fibulin extracellular matrix protein 1	EFEMP1
192	2202	A0A0S2Z3V1	EGF containing fibulin extracellular matrix protein 1	EFEMP1
193	8892	P49770	eukaryotic translation initiation factor 2B subunit beta	EIF2B2
194	8892	Q53XC2	eukaryotic translation initiation factor 2B subunit beta	EIF2B2
195	3107	O19617	major histocompatibility complex, class I, C	HLA-C
196	3107	P10321	major histocompatibility complex, class I, C	HLA-C
197	3107	Q6R739	major histocompatibility complex, class I, C	HLA-C
198	3107	Q95HC2	major histocompatibility complex, class I, C	HLA-C
199	6583	Q9H015	solute carrier family 22 member 4	SLC22A4
200	10253	O43597	sprouty RTK signaling antagonist 2	SPRY2
201	80326	Q9GZT5	Wnt family member 10A	WNT10A
202	1120	A0A024R4X4	choline kinase beta	CHKB
203	1120	Q9Y259	choline kinase beta	CHKB
204	81704	Q8NF50	dedicator of cytokinesis 8	DOCK8
205	81704	E2J6M5	dedicator of cytokinesis 8	DOCK8
206	81704	E2J6M6	dedicator of cytokinesis 8	DOCK8
207	2018	Q04743	empty spiracles homeobox 2	EMX2
208	3992	A0A0A0MR51	fatty acid desaturase 1	FADS1
209	3992	O60427	fatty acid desaturase 1	FADS1
210	9415	O95864	fatty acid desaturase 2	FADS2
211	8091	F5H2A4	high mobility group AT-hook 2	HMGA2
212	8091	F5H6H0	high mobility group AT-hook 2	HMGA2
213	8091	Q1M183	high mobility group AT-hook 2	HMGA2
214	8091	P52926	high mobility group AT-hook 2	HMGA2
215	4254	A0A024RBC0	KIT ligand	KITLG
216	4254	P21583	KIT ligand	KITLG
217	4254	A0A024RBF5	KIT ligand	KITLG
218	5351	A0A024R4H0	procollagen-lysine,2-oxoglutarate 5-dioxygenase 1	PLOD1
219	5351	Q02809	procollagen-lysine,2-oxoglutarate 5-dioxygenase 1	PLOD1
220	639	O75626	PR/SET domain 1	PRDM1
221	639	B4DW27	PR/SET domain 1	PRDM1
222	639	Q5T4E8	PR/SET domain 1	PRDM1
223	25797	Q16769	glutaminyl-peptide cyclotransferase	QPCT
224	10057	O15440	ATP binding cassette subfamily C member 5	ABCC5
225	56052	Q9BT22	ALG1 chitobiosyldiphosphodolichol beta-mannosyltransferase	ALG1
226	9474	A9UGY9	autophagy related 5	ATG5
227	9474	Q7Z3H3	autophagy related 5	ATG5
228	9474	Q9H1Y0	autophagy related 5	ATG5
229	1138	P30532	cholinergic receptor nicotinic alpha 5 subunit	CHRNA5
230	1138	Q6EWN4	cholinergic receptor nicotinic alpha 5 subunit	CHRNA5
231	1138	H0YM98	cholinergic receptor nicotinic alpha 5 subunit	CHRNA5
232	53405	Q53G01	chloride intracellular channel 5	CLIC5
233	53405	Q9NZA1	chloride intracellular channel 5	CLIC5
234	53405	Q49AE1	chloride intracellular channel 5	CLIC5
235	9785	Q92620	DEAH-box helicase 38	DHX38
236	10056	Q9NSD9	phenylalanyl-tRNA synthetase subunit beta	FARSB
237	3398	Q02363	inhibitor of DNA binding 2	ID2
238	3398	Q53T66	inhibitor of DNA binding 2	ID2
239	4948	Q04671	OCA2 melanosomal transmembrane protein	OCA2
240	5225	P20142	progastricsin	PGC
241	5685	P25789	proteasome 20S subunit alpha 4	PSMA4
242	5685	H0YLC2	proteasome 20S subunit alpha 4	PSMA4
243	5685	H0YN18	proteasome 20S subunit alpha 4	PSMA4
244	153201	Q495M3	solute carrier family 36 member 2	SLC36A2
245	64116	A0A024RDG0	solute carrier family 39 member 8	SLC39A8
246	64116	Q9C0K1	solute carrier family 39 member 8	SLC39A8
247	6716	P31213	steroid 5 alpha-reductase 2	SRD5A2
248	6733	A0A024R704	SRSF protein kinase 2	SRPK2
249	6733	P78362	SRSF protein kinase 2	SRPK2
250	164	A0A140VJE7	adaptor related protein complex 1 subunit gamma 1	AP1G1
251	164	O43747	adaptor related protein complex 1 subunit gamma 1	AP1G1
252	164	Q8IY97	adaptor related protein complex 1 subunit gamma 1	AP1G1
253	84733	Q14781	chromobox 2	CBX2
254	1437	P04141	colony stimulating factor 2	CSF2
255	668	P58012	forkhead box L2	FOXL2
256	668	Q53ZD3	forkhead box L2	FOXL2
257	23189	Q14678	KN motif and ankyrin repeat domains 1	KANK1
258	3975	P48742	LIM homeobox 1	LHX1
259	3975	Q58F18	LIM homeobox 1	LHX1
260	27030	Q9UHC1	mutL homolog 3	MLH3
261	27030	Q2M1Z1	mutL homolog 3	MLH3
262	27249	Q9H3L0	metabolism of cobalamin associated D	MMADHC
263	56945	P82650	mitochondrial ribosomal protein S22	MRPS22
264	10651	O75431	metaxin 2	MTX2
265	10	A4Z6T7	N-acetyltransferase 2	NAT2
266	10	P11245	N-acetyltransferase 2	NAT2
267	54820	Q9NXR1	nudE neurodevelopment protein 1	NDE1
268	54820	X5DR54	nudE neurodevelopment protein 1	NDE1
269	54820	X5DP35	nudE neurodevelopment protein 1	NDE1
270	8504	P56589	peroxisomal biogenesis factor 3	PEX3
271	5228	P49763	placental growth factor	PGF
272	5228	Q86TW6	placental growth factor	PGF
273	5228	G3XA84	placental growth factor	PGF
274	5228	Q53XY6	placental growth factor	PGF
275	5317	Q13835	plakophilin 1	PKP1
276	5317	A0A024R952	plakophilin 1	PKP1
277	5361	Q9UIW2	plexin A1	PLXNA1
278	5550	B2RAH7	prolyl endopeptidase	PREP
279	5550	P48147	prolyl endopeptidase	PREP
280	5396	P54821	paired related homeobox 1	PRRX1
281	5913	A0A0S2Z4F8	receptor associated protein of the synapse	RAPSN
282	5913	Q13702	receptor associated protein of the synapse	RAPSN
283	5913	A0A0S2Z4M9	receptor associated protein of the synapse	RAPSN
284	5913	A0A0S2Z4A6	receptor associated protein of the synapse	RAPSN
285	5913	A0A0S2Z4A2	receptor associated protein of the synapse	RAPSN
286	8698	O95977	sphingosine-1-phosphate receptor 4	S1PR4
287	166378	Q8NB90	spermatogenesis associated 5	SPATA5
288	117581	A0A024R4D4	twist family bHLH transcription factor 2	TWIST2
289	117581	Q8WVJ9	twist family bHLH transcription factor 2	TWIST2
290	26137	Q9HC78	zinc finger and BTB domain containing 20	ZBTB20
291	26137	B2RCW4	zinc finger and BTB domain containing 20	ZBTB20
292	11173	Q9UFZ4	ADAM metallopeptidase with thrombospondin type 1 motif 7	ADAMTS7
293	11173	Q9UKP4	ADAM metallopeptidase with thrombospondin type 1 motif 7	ADAMTS7
294	9590	Q02952	A-kinase anchoring protein 12	AKAP12
295	9590	Q86TJ9	A-kinase anchoring protein 12	AKAP12
296	8874	Q14155	Rho guanine nucleotide exchange factor 7	ARHGEF7
297	8874	Q5W9H1	Rho guanine nucleotide exchange factor 7	ARHGEF7
298	8874	A0A024RDY9	Rho guanine nucleotide exchange factor 7	ARHGEF7
299	8874	B7Z6G2	Rho guanine nucleotide exchange factor 7	ARHGEF7
300	8874	B7Z344	Rho guanine nucleotide exchange factor 7	ARHGEF7
301	8874	E9PDQ5	Rho guanine nucleotide exchange factor 7	ARHGEF7
302	23200	B4DKX1	ATPase phospholipid transporting 11B (putative)	ATP11B
303	23200	B4E3T1	ATPase phospholipid transporting 11B (putative)	ATP11B
304	23200	Q9Y2G3	ATPase phospholipid transporting 11B (putative)	ATP11B
305	23774	A0A024R4V5	bromodomain containing 1	BRD1
306	23774	O95696	bromodomain containing 1	BRD1
307	23774	A0A024R4W4	bromodomain containing 1	BRD1
308	23774	Q59G93	bromodomain containing 1	BRD1
309	8535	A0A0S2Z5B2	chromobox 4	CBX4
310	8535	O00257	chromobox 4	CBX4
311	1381	F1T0F7	cellular retinoic acid binding protein 1	CRABP1
312	1381	P29762	cellular retinoic acid binding protein 1	CRABP1
313	10913	Q9UNE0	ectodysplasin A receptor	EDAR
314	80153	Q96F86	enhancer of mRNA decapping 3	EDC3
315	2519	Q9BTY2	alpha-L-fucosidase 2	FUCA2
316	51343	Q9UM11	fizzy and cell division cycle 20 related 1	FZR1
317	2769	P30679	G protein subunit alpha 15	GNA15
318	57498	Q9ULH0	kinase D interacting substrate 220	KIDINS220
319	8685	Q4ZG40	macrophage receptor with collagenous structure	MARCO
320	8685	Q9UEW3	macrophage receptor with collagenous structure	MARCO
321	4277	B4DUT9	MHC class I polypeptide-related sequence B	MICB
322	4277	B7Z8M1	MHC class I polypeptide-related sequence B	MICB
323	4277	F5H7Q8	MHC class I polypeptide-related sequence B	MICB
324	4277	Q29980	MHC class I polypeptide-related sequence B	MICB
325	4277	A0A0G2JHB5	MHC class I polypeptide-related sequence B	MICB
326	4277	X6R344	MHC class I polypeptide-related sequence B	MICB
327	10933	Q9UBU8	mortality factor 4 like 1	MORF4L1
328	51588	B3KMR4	protein inhibitor of activated STAT 4	PIAS4
329	51588	Q8N2W9	protein inhibitor of activated STAT 4	PIAS4
330	5893	P43351	RAD52 homolog, DNA repair protein	RAD52
331	5893	Q5DR82	RAD52 homolog, DNA repair protein	RAD52
332	5893	B7Z5Q6	RAD52 homolog, DNA repair protein	RAD52
333	5893	B7Z2G8	RAD52 homolog, DNA repair protein	RAD52
334	5893	F5GX32	RAD52 homolog, DNA repair protein	RAD52
335	5923	Q8IUU5	Ras protein specific guanine nucleotide releasing factor 1	RASGRF1
336	5923	A8K270	Ras protein specific guanine nucleotide releasing factor 1	RASGRF1
337	5923	Q13972	Ras protein specific guanine nucleotide releasing factor 1	RASGRF1
338	390	B2R838	Rho family GTPase 3	RND3
339	390	P61587	Rho family GTPase 3	RND3
340	6119	A4D105	replication protein A3	RPA3
341	6119	P35244	replication protein A3	RPA3
342	25769	Q9UI40	solute carrier family 24 member 2	SLC24A2
343	7504	P51811	X-linked Kx blood group	XK
344	79174	Q6UXH1	cysteine rich with EGF like domains 2	CRELD2
345	2019	Q05925	engrailed homeobox 1	EN1
346	3250	P00739	haptoglobin-related protein	HPR
347	166785	Q8IVH4	metabolism of cobalamin associated A	MMAA
348	4782	B7Z4T6	nuclear factor I C	NFIC
349	4782	P08651	nuclear factor I C	NFIC
350	8572	A0A0S2Z4N4	PDZ and LIM domain 4	PDLIM4
351	8572	P50479	PDZ and LIM domain 4	PDLIM4
352	23035	Q6ZVD8	PH domain and leucine rich repeat protein phosphatase 2	PHLPP2
353	22841	Q7L804	RAB11 family interacting protein 2	RAB11FIP2
354	8464	B4E1H0	SPT3 homolog, SAGA and STAGA complex component	SUPT3H
355	8464	A0A024RD67	SPT3 homolog, SAGA and STAGA complex component	SUPT3H
356	8464	O75486	SPT3 homolog, SAGA and STAGA complex component	SUPT3H
357	23093	Q6EMB2	tubulin tyrosine ligase like 5	TTLL5
358	8165	A0A140VK05	A-kinase anchoring protein 1	AKAP1
359	8165	B4DN86	A-kinase anchoring protein 1	AKAP1
360	8165	Q92667	A-kinase anchoring protein 1	AKAP1
361	57018	Q9UK58	cyclin L1	CCNL1
362	10602	Q9UKI2	CDC42 effector protein 3	CDC42EP3
363	22905	O95208	epsin 2	EPN2
364	23295	O60291	mahogunin ring finger 1	MGRN1
365	4300	P42568	MLLT3 super elongation complex subunit	MLLT3
366	4300	A0A0S2Z448	MLLT3 super elongation complex subunit	MLLT3
367	4925	Q2L696	nucleobindin 2	NUCB2
368	4925	P80303	nucleobindin 2	NUCB2
369	4925	V9HW75	nucleobindin 2	NUCB2
370	55328	Q5VYX0	renalase, FAD dependent amine oxidase	RNLS
371	55328	B4DJW3	renalase, FAD dependent amine oxidase	RNLS
372	81846	Q86WG5	SET binding factor 2	SBF2
373	51151	Q9UMX9	solute carrier family 45 member 2	SLC45A2
374	51151	D6RGY6	solute carrier family 45 member 2	SLC45A2
375	51151	A0A076YGN1	solute carrier family 45 member 2	SLC45A2
376	23224	Q8WXH0	spectrin repeat containing nuclear envelope protein 2	SYNE2
377	23224	Q6MZP0	spectrin repeat containing nuclear envelope protein 2	SYNE2
378	8887	Q86VP1	Tax1 binding protein 1	TAX1BP1
379	8887	B4DSG5	Tax1 binding protein 1	TAX1BP1
380	201633	Q495A1	T cell immunoreceptor with Ig and ITIM domains	TIGIT
381	25890	Q7Z7G0	ABI family member 3 binding protein	ABI3BP
382	97	P07311	acylphosphatase 1	ACYP1
383	97	G3V2U7	acylphosphatase 1	ACYP1
384	11216	E7EMD6	A-kinase anchoring protein 10	AKAP10
385	11216	A0A0S2Z4Z7	A-kinase anchoring protein 10	AKAP10
386	11216	O43572	A-kinase anchoring protein 10	AKAP10
387	57332	Q9HC52	chromobox 8	CBX8
388	10658	Q92879	CUGBP Elav-like family member 1	CELF1
389	10658	G5EA30	CUGBP Elav-like family member 1	CELF1
390	253782	Q6ZMG9	ceramide synthase 6	CERS6
391	54206	B3KTV8	ERBB receptor feedback inhibitor 1	ERRFI1
392	54206	I6S2Y9	ERBB receptor feedback inhibitor 1	ERRFI1
393	54206	Q9UJM3	ERBB receptor feedback inhibitor 1	ERRFI1
394	342184	Q68DA7	formin 1	FMN1
395	342184	H0YM30	formin 1	FMN1
396	113263	Q86VQ1	glucocorticoid induced 1	GLCCI1
397	9798	P53990	IST1 factor associated with ESCRT-III	IST1
398	9798	B4DXC9	IST1 factor associated with ESCRT-III	IST1
399	221895	Q86VZ6	JAZF zinc finger 1	JAZF1
400	3898	O00515	ladinin 1	LAD1
401	431707	Q68G74	LIM homeobox 8	LHX8
403	51072	Q9Y316	mediator of cell motility 1	MEMO1
404	51072	A8K3Y8	mediator of cell motility 1	MEMO1
405	4289	B4DG30	muskelin 1	MKLN1
406	4289	Q9UL63	muskelin 1	MKLN1
407	29781	Q6IBW4	non-SMC condensin II complex subunit H2	NCAPH2
408	11162	P53370	nudix hydrolase 6	NUDT6
409	11162	B4DG76	nudix hydrolase 6	NUDT6
410	23654	O15031	plexin B2	PLXNB2
411	23362	B3KRC4	pleckstrin and Sec7 domain containing 3	PSD3
412	23362	Q9NYI0	pleckstrin and Sec7 domain containing 3	PSD3
413	22913	Q9UKM9	RALY heterogeneous nuclear ribonucleoprotein	RALY
414	22913	Q53GL6	RALY heterogeneous nuclear ribonucleoprotein	RALY
415	221035	Q6NUK4	receptor accessory protein 3	REEP3
416	221035	X5DR89	receptor accessory protein 3	REEP3
417	221035	X5DP57	receptor accessory protein 3	REEP3
418	22980	Q9BQ70	transcription factor 25	TCF25
419	7571	B3KR55	zinc finger protein 23	ZNF23
420	7571	P17027	zinc finger protein 23	ZNF23
421	7571	B4DLS2	zinc finger protein 23	ZNF23
422	51665	Q9Y576	ankyrin repeat and SOCS box containing 1	ASB1
423	51665	B9A047	ankyrin repeat and SOCS box containing 1	ASB1
424	54875	Q9NXG0	centlein	CNTLN
425	54875	B1AMC8	centlein	CNTLN
426	9648	B3KR21	GRIP and coiled-coil domain containing 2	GCC2
427	9648	Q8IWJ2	GRIP and coiled-coil domain containing 2	GCC2
428	3671	A0A146E5L3	immunoglobulin superfamily containing leucine rich repeat	ISLR
429	3671	O14498	immunoglobulin superfamily containing leucine rich repeat	ISLR
430	54602	B4DGY6	Nedd4 family interacting protein 2	NDFIP2
431	54602	Q9NV92	Nedd4 family interacting protein 2	NDFIP2
432	51070	Q9Y314	nitric oxide synthase interacting protein	NOSIP
433	51070	A0A075B6F9	nitric oxide synthase interacting protein	NOSIP
434	79641	Q9GZN7	rogdi atypical leucine zipper	ROGDI
435	29855	Q9NPG3	ubinuclein 1	UBN1
436	25862	Q70CQ1	ubiquitin specific peptidase 49	USP49
437	55689	Q9ULM3	YEATS domain containing 2	YEATS2
438	27077	A8MYG7	B9 domain containing 1	B9D1
439	27077	B4DEW0	B9 domain containing 1	B9D1
440	27077	Q9UPM9	B9 domain containing 1	B9D1
441	27077	A0A0B4J223	B9 domain containing 1	B9D1
442	27077	A8MTX4	B9 domain containing 1	B9D1
443	54800	Q6TFL4	kelch like family member 24	KLHL24
444	89857	Q8WZ60	kelch like family member 6	KLHL6
445	254251	Q8N3X6	ligand dependent nuclear receptor corepressor like	LCORL
446	254251	B4DSW0	ligand dependent nuclear receptor corepressor like	LCORL
447	115294	F5H1M8	protein-L-isoaspartate (D-aspartate) O-methyltransferase domain containing 1	PCMTD1
448	115294	Q96MG8	protein-L-isoaspartate (D-aspartate) O-methyltransferase domain containing 1	PCMTD1
449	115294	A0A024R7U8	protein-L-isoaspartate (D-aspartate) O-methyltransferase domain containing 1	PCMTD1
450	115294	B7Z927	protein-L-isoaspartate (D-aspartate) O-methyltransferase domain containing 1	PCMTD1
451	399694	Q6S5L8	SHC adaptor protein 4	SHC4
452	116984	A7E2A5	ArfGAP with RhoGAP domain, ankyrin repeat and PH domain 2	ARAP2
453	116984	Q8WZ64	ArfGAP with RhoGAP domain, ankyrin repeat and PH domain 2	ARAP2
454	54622	Q9NXU5	ADP ribosylation factor like GTPase 15	ARL15
455	201134	Q8N8E3	centrosomal protein 112	CEP112
456	201134	F5GYE8	centrosomal protein 112	CEP112
457	84303	Q9BRQ6	coiled-coil-helix-coiled-coil-helix domain containing 6	CHCHD6
458	166012	Q8NET6	carbohydrate sulfotransferase 13	CHST13
459	54849	Q6ZN54	differentially expressed in FDCP 8 homolog	DEF8
460	83475	Q9BU89	deoxyhypusine hydroxylase	DOHH
461	2005	A0A024R9C2	ETS transcription factor ELK4	ELK4
462	2005	P28324	ETS transcription factor ELK4	ELK4
463	2005	Q8IXL1	ETS transcription factor ELK4	ELK4
464	2005	A0A024R997	ETS transcription factor ELK4	ELK4
465	10817	A0A140VJJ7	fibroblast growth factor receptor substrate 3	FRS3
466	10817	O43559	fibroblast growth factor receptor substrate 3	FRS3
467	84656	Q49A26	glyoxylate reductase 1 homolog	GLYR1
468	84656	Q9NZ78	glyoxylate reductase 1 homolog	GLYR1
469	84656	D3DUE6	glyoxylate reductase 1 homolog	GLYR1
470	10362	Q9P0W2	high mobility group 20B	HMG20B
471	91156	Q86VF2	immunoglobulin like and fibronectin type III domain containing 1	IGFN1
472	129642	B0AZU0	membrane bound O-acyltransferase domain containing 2	MBOAT2
473	129642	Q6ZWT7	membrane bound O-acyltransferase domain containing 2	MBOAT2
474	129642	B7Z3I3	membrane bound O-acyltransferase domain containing 2	MBOAT2
475	23101	Q86YR7	MCF.2 cell line derived transforming sequence-like 2	MCF2L2
476	9258	Q9Y4C4	multifunctional ROCO family signaling regulator 1	MFHAS1
477	126321	Q6NUT3	major facilitator superfamily domain containing 12	MFSD12
478	133522	B7ZM40	PPARG coactivator 1 beta	PPARGC1B
479	133522	Q86YN6	PPARG coactivator 1 beta	PPARGC1B
480	137902	A1KZ92	peroxidasin like	PXDNL
481	7732	Q9ULX5	ring finger protein 112	RNF112
482	83694	B4DSP6	ribosomal protein S6 kinase like 1	RPS6KL1
483	83694	Q9Y6S9	ribosomal protein S6 kinase like 1	RPS6KL1
484	84501	Q8WWL2	spire type actin nucleation factor 2	SPIRE2
485	9399	Q53HB6	stomatin like 1	STOML1
486	9399	Q9UBI4	stomatin like 1	STOML1
487	9399	H3BST3	stomatin like 1	STOML1
488	23051	Q9H4I2	zinc fingers and homeoboxes 3	ZHX3
489	55565	O75541	zinc finger protein 821	ZNF821
490	55565	A0A0C4DH12	zinc finger protein 821	ZNF821
491	55565	A0A087WXX1	zinc finger protein 821	ZNF821
492	79364	Q2QGD7	ZXD family zinc finger C	ZXDC
493	134637	Q7Z6V5	adenosine deaminase tRNA specific 2	ADAT2
494	342371	P0C7T5	ataxin 1 like	ATXN1L
495	27319	B4DF88	basic helix-loop-helix family member e22	BHLHE22
496	27319	Q8NFJ8	basic helix-loop-helix family member e22	BHLHE22
497	10944	O00193	chromosome 11 open reading frame 58	C11orf58
498	1797	A0A024RCW8	decapping exoribonuclease	DXO
499	1797	O77932	decapping exoribonuclease	DXO
500	56169	Q9BYG8	gasdermin C	GSDMC
501	135458	Q8NHY5	HUS1 checkpoint clamp component B	HUS1B
502	91862	Q96A59	MARVEL domain containing 3	MARVELD3
503	153443	Q8NEF9	serum response factor binding protein 1	SRFBP1
504	25976	Q7Z3E1	TCDD inducible poly(ADP-ribose) polymerase	TIPARP
505	25976	Q05BQ2	TCDD inducible poly(ADP-ribose) polymerase	TIPARP
506	221527	Q9Y330	zinc finger and BTB domain containing 12	ZBTB12
507	114900	Q9BXJ3	C1q and TNF related 4	C1QTNF4
508	285527	B3KXG5	FRY like transcription coactivator	FRYL
509	285527	O94915	FRY like transcription coactivator	FRYL
510	285527	Q6ZR29	FRY like transcription coactivator	FRYL
511	8934	B2R7I9	RAB29, member RAS oncogene family	RAB29
512	8934	O14966	RAB29, member RAS oncogene family	RAB29
513	8934	Q6FGU7	RAB29, member RAS oncogene family	RAB29
514	113174	G1UCX3	serum amyloid A like 1	SAAL1
515	113174	Q96ER3	serum amyloid A like 1	SAAL1
516	9717	O43304	SEC14 like lipid binding 5	SEC14L5
517	285641	Q495N2	solute carrier family 36 member 3	SLC36A3
518	79696	A0A024R6E6	zinc finger C2HC-type containing 1C	ZC2HC1C
519	79696	Q53FD0	zinc finger C2HC-type containing 1C	ZC2HC1C
520	79696	J3KMY6	zinc finger C2HC-type containing 1C	ZC2HC1C
521	165055	Q96M89	coiled-coil domain containing 138	CCDC138
522	389170	J3KP02	leucine, glutamate and lysine rich 1	LEKR1
523	389170	D3DNK7	leucine, glutamate and lysine rich 1	LEKR1
524	374383	Q68D85	natural killer cell cytotoxicity receptor 3 ligand 1	NCR3LG1
525	389090	Q6IFH4	olfactory receptor family 6 subfamily B member 2	OR6B2
526	283571	Q3B8N5	prospero homeobox 2	PROX2
527	283571	G3V3G0	prospero homeobox 2	PROX2
528	375287	Q6ZSC3	RNA binding motif protein 43	RBM43
529	7979	P60896	SEM1 26S proteasome subunit	SEM1
530	7979	Q6IBB7	SEM1 26S proteasome subunit	SEM1
531	50651	Q9Y2W3	solute carrier family 45 member 1	SLC45A1
532	85460	Q9C0D4	zinc finger protein 518B	ZNF518B
533	57184	Q5XKK7	family with sequence similarity 219 member B	FAM219B
534	123688	A2RU49	hydroxylysine kinase	HYKK
535	342372	Q7Z443	polycystin 1 like 3, transient receptor potential channel interacting	PKD1L3
536	5639	O14669	proline rich and Gla domain 2	PRRG2
537	55076	Q9NWC5	transmembrane protein 45A	TMEM45A
538	55076	J3KQ06	transmembrane protein 45A	TMEM45A
539	283971	Q8NCF0	C-type lectin domain family 18 member C	CLEC18C
540	401124	Q6ZMT9	death domain containing 1	DTHD1
541	647219	M0R2M9	achaete-scute family bHLH transcription factor 5	ASCL5
542	283677	Q7Z4M0	REC114 meiotic recombination protein	REC114
543	283677	H0YKR2	REC114 meiotic recombination protein	REC114
544	124404	A0A140VJU2	septin 12	SEPTIN12
545	124404	Q8IYM1	septin 12	SEPTIN12
546	55765	Q3KP66	innate immunity activator	INAVA
547	130540	Q96Q35	flagellum associated containing coiled-coil domains 1	FLACC1
548	130540	A8K8B8	flagellum associated containing coiled-coil domains 1	FLACC1
549	80133	Q5TGP6	maestro heat like repeat family member 9	MROH9
550	157285	Q86YV5	PEAK1 related, kinase-activating pseudokinase 1	PRAG1
551	284422	O75264	small integral membrane protein 24	SMIM24
552	123811	Q96NB1	centrosomal protein 20	CEP20
553	123811	I3L2N4	centrosomal protein 20	CEP20
554	123811	I3NI25	centrosomal protein 20	CEP20
555	123811	I3L269	centrosomal protein 20	CEP20
556	123811	I3L4V2	centrosomal protein 20	CEP20
557	148808	Q8N468	major facilitator superfamily domain containing 4A	MFSD4A
558	148808	Q96KX6	major facilitator superfamily domain containing 4A	MFSD4A
559	401089	Q6ZUU3	FOXL2 neighbor	FOXL2NB
560	389152	Q6ZRP0	proline rich 23C	PRR23C
561	100287171	A8K0Z3	WASH complex subunit 1	WASHC1
562	440335	A0A1U9AC72	small integral membrane protein 22	SMIM22
563	440335	K7EJ46	small integral membrane protein 22	SMIM22
564	100128569	A6NCJ1	tektin bundle interacting protein 1	TEKTIP1
565	729852	A4D104	UBAP1-MVB12-associated (UMA) domain containing 1	UMAD1
566	729852	C9J7I0	UBAP1-MVB12-associated (UMA) domain containing 1	UMAD1
569	1277	P02452	collagen type I alpha 1 chain	COL1A1
570	7040	P01137	transforming growth factor beta 1	TGFB1
571	5743	P35354	prostaglandin-endoperoxide synthase 2	PTGS2
572	360	Q92482	aquaporin 3 (Gill blood group)	AQP3
573	1786	I6L9H2	DNA methyltransferase 1	DNMT1
574	1786	P26358	DNA methyltransferase 1	DNMT1
575	1786	Q59FP7	DNA methyltransferase 1	DNMT1
576	4780	Q16236	NFE2 like bZIP transcription factor 2	NFE2L2
577	1991	P08246	elastase, neutrophil expressed	ELANE
578	5914	P10276	retinoic acid receptor alpha	RARA
579	5914	Q6I9R7	retinoic acid receptor alpha	RARA
580	5914	F1D8N9	retinoic acid receptor alpha	RARA
581	5914	A8K840	retinoic acid receptor alpha	RARA
582	5914	A8MUP8	retinoic acid receptor alpha	RARA
583	3725	P05412	Jun proto-oncogene, AP-1 transcription factor subunit	JUN
584	3713	P07476	involucrin	IVL
585	654	B4DUF7	bone morphogenetic protein 6	BMP6
586	654	P22004	bone morphogenetic protein 6	BMP6
587	654	Q4VBA3	bone morphogenetic protein 6	BMP6
588	1634	P07585	decorin	DCN
589	1634	Q6FH10	decorin	DCN
590	1634	A0A024RBG6	decorin	DCN
591	7421	F1D8P8	vitamin D receptor	VDR
592	7421	P11473	vitamin D receptor	VDR
593	9365	Q9UEF7	klotho	KL
594	6696	A0A024RDE6	secreted phosphoprotein 1	SPP1
595	6696	P10451	secreted phosphoprotein 1	SPP1
596	6696	A0A024RDE2	secreted phosphoprotein 1	SPP1
597	6696	A0A024RDJ0	secreted phosphoprotein 1	SPP1
598	6696	Q3LGB0	secreted phosphoprotein 1	SPP1
599	6696	B7Z351	secreted phosphoprotein 1	SPP1
600	5602	A0A286YF97	mitogen-activated protein kinase 10	MAPK10
601	5602	P53779	mitogen-activated protein kinase 10	MAPK10
602	5602	Q499Y8	mitogen-activated protein kinase 10	MAPK10
603	5602	A8MWW6	mitogen-activated protein kinase 10	MAPK10
604	5602	A0A1P0B7D2	mitogen-activated protein kinase 10	MAPK10
605	5602	A0A286YFD7	mitogen-activated protein kinase 10	MAPK10
606	5602	A0A286YEQ7	mitogen-activated protein kinase 10	MAPK10
607	5602	D6RJF9	mitogen-activated protein kinase 10	MAPK10
608	5602	A0A286YFN2	mitogen-activated protein kinase 10	MAPK10
609	5602	A0A286YES0	mitogen-activated protein kinase 10	MAPK10
610	5602	I6L9F3	mitogen-activated protein kinase 10	MAPK10
611	5602	A0A286YF02	mitogen-activated protein kinase 10	MAPK10
612	5602	D6RCB1	mitogen-activated protein kinase 10	MAPK10
613	8372	A0A024R2Y7	hyaluronidase 3	HYAL3
614	8372	O43820	hyaluronidase 3	HYAL3
615	6647	P00441	superoxide dismutase 1	SOD1
616	6647	V9HWC9	superoxide dismutase 1	SOD1
617	2312	P20930	filaggrin	FLG
618	4014	P23490	loricrin cornified envelope precursor protein	LORICRIN
619	5594	P28482	mitogen-activated protein kinase 1	MAPK1
620	5594	Q1HBJ4	mitogen-activated protein kinase 1	MAPK1
621	5594	Q499G7	mitogen-activated protein kinase 1	MAPK1
622	2720	P16278	galactosidase beta 1	GLB1
623	2720	B7Z6Q5	galactosidase beta 1	GLB1
624	1490	P29279	cellular communication network factor 2	CCN2
625	1490	Q5M8T4	cellular communication network factor 2	CCN2
626	2353	P01100	Fos proto-oncogene, AP-1 transcription factor subunit	FOS
627	2353	Q6FG41	Fos proto-oncogene, AP-1 transcription factor subunit	FOS
628	5080	P26367	paired box 6	PAX6
629	5080	Q66SS1	paired box 6	PAX6
630	5080	F1T0F8	paired box 6	PAX6
631	5080	D1KF47	paired box 6	PAX6
632	5080	A0A1W2PRA8	paired box 6	PAX6
633	5015	F1T0D1	orthodenticle homeobox 2	OTX2
634	5015	P32243	orthodenticle homeobox 2	OTX2
635	5015	F1T0C9	orthodenticle homeobox 2	OTX2
636	5015	F1T0D0	orthodenticle homeobox 2	OTX2
637	338917	P58304	visual system homeobox 2	VSX2
638	30062	Q9Y2V3	retina and anterior neural fold homeobox	RAX
639	1029	K7PML8	cyclin dependent kinase inhibitor 2A	CDKN2A
640	1029	P42771	cyclin dependent kinase inhibitor 2A	CDKN2A
641	1029	Q8N726	cyclin dependent kinase inhibitor 2A	CDKN2A
642	1029	G3XAG3	cyclin dependent kinase inhibitor 2A	CDKN2A
643	1958	P18146	early growth response 1	EGR1
644	1958	Q546S1	early growth response 1	EGR1
645	4313	P08253	matrix metallopeptidase 2	MMP2
646	4313	A0A024R6R4	matrix metallopeptidase 2	MMP2
647	3290	P28845	hydroxysteroid 11-beta dehydrogenase 1	HSD11B1
648	3290	X5D2L1	hydroxysteroid 11-beta dehydrogenase 1	HSD11B1
649	4088	P84022	SMAD family member 3	SMAD3
650	4088	A0A024R5Z3	SMAD family member 3	SMAD3
651	4088	Q9P0T0	SMAD family member 3	SMAD3
652	3569	B4DVM1	interleukin 6	IL6
653	3569	P05231	interleukin 6	IL6
654	3569	Q75MH2	interleukin 6	IL6
655	3569	B5MC21	interleukin 6	IL6
656	3569	B4DNQ5	interleukin 6	IL6
657	1462	P13611	versican	VCAN
658	1462	Q86W61	versican	VCAN
659	1462	A0A024RAL1	versican	VCAN
660	1462	Q6MZK8	versican	VCAN
661	1462	A0A024RAP3	versican	VCAN
662	1462	A0A024RAQ9	versican	VCAN
663	1462	Q59FG9	versican	VCAN
664	3553	P01584	interleukin 1 beta	IL1B
665	3552	P01583	interleukin 1 alpha	IL1A
666	1026	A0A024RCX5	cyclin dependent kinase inhibitor 1A	CDKN1A
667	1026	P38936	cyclin dependent kinase inhibitor 1A	CDKN1A
668	2171	E7DVW5	fatty acid binding protein 5	FABP5
669	2171	Q01469	fatty acid binding protein 5	FABP5
670	1956	Q504U8	epidermal growth factor receptor	EGFR
671	1956	E7BSV0	epidermal growth factor receptor	EGFR
672	1956	F2YGG7	epidermal growth factor receptor	EGFR
673	1956	E9PFD7	epidermal growth factor receptor	EGFR
674	1956	B7Z2I3	epidermal growth factor receptor	EGFR
675	1956	P00533	epidermal growth factor receptor	EGFR
676	177	A0A1U9X785	advanced glycosylation end-product specific receptor	AGER
677	177	B4DNX3	advanced glycosylation end-product specific receptor	AGER
678	177	Q15109	advanced glycosylation end-product specific receptor	AGER
679	1080	A0A024R730	CF transmembrane conductance regulator	CFTR
680	1080	P13569	CF transmembrane conductance regulator	CFTR
681	1281	P02461	collagen type III alpha 1 chain	COL3A1
682	2199	P98095	fibulin 2	FBLN2
683	2199	Q86V58	fibulin 2	FBLN2
684	2199	Q9Y3V7	fibulin 2	FBLN2
685	7015	O14746	telomerase reverse transcriptase	TERT
686	4000	P02545	lamin A/C	LMNA
687	4000	Q5TCI8	lamin A/C	LMNA
688	4089	A0A024R274	SMAD family member 4	SMAD4
689	4089	Q13485	SMAD family member 4	SMAD4
690	1278	A0A0S2Z3H5	collagen type I alpha 2 chain	COL1A2
691	1278	P08123	collagen type I alpha 2 chain	COL1A2
692	4316	P09237	matrix metallopeptidase 7	MMP7
693	8692	Q12891	hyaluronidase 2	HYAL2
694	4482	Q9UJ68	methionine sulfoxide reductase A	MSRA
695	51734	Q9NZV6	methionine sulfoxide reductase B1	MSRB1
696	5111	P12004	proliferating cell nuclear antigen	PCNA
697	5173	P01213	prodynorphin	PDYN
698	51548	Q8N6T7	sirtuin 6	SIRT6
699	51548	B4DDV3	sirtuin 6	SIRT6
700	51548	M0QXA0	sirtuin 6	SIRT6
701	51548	M0R1N9	sirtuin 6	SIRT6
702	4237	P55001	microfibril associated protein 2	MFAP2
703	4237	A0A024RA94	microfibril associated protein 2	MFAP2
704	3082	P14210	hepatocyte growth factor	HGF
705	4322	P45452	matrix metallopeptidase 13	MMP13
706	4322	Q53H33	matrix metallopeptidase 13	MMP13
707	4001	B4DZT3	lamin B1	LMNB1
708	4001	P20700	lamin B1	LMNB1
709	4321	P39900	matrix metallopeptidase 12	MMP12
710	7442	Q8NER1	transient receptor potential cation channel subfamily V member 1	TRPV1
711	5831	E2QRB3	pyrroline-5-carboxylate reductase 1	PYCR1
712	5831	A0A024R8U9	pyrroline-5-carboxylate reductase 1	PYCR1
713	5831	P32322	pyrroline-5-carboxylate reductase 1	PYCR1
714	5831	J3QL32	pyrroline-5-carboxylate reductase 1	PYCR1
715	5831	Q8TBX0	pyrroline-5-carboxylate reductase 1	PYCR1
716	1896	A0A0U5J797	ectodysplasin A	EDA
717	1896	Q92838	ectodysplasin A	EDA
718	5266	P19957	peptidase inhibitor 3	PI3
719	31	B2ZZ90	acetyl-CoA carboxylase alpha	ACACA
720	31	Q13085	acetyl-CoA carboxylase alpha	ACACA
721	31	Q7Z5W8	acetyl-CoA carboxylase alpha	ACACA
722	31	A0A024R0Y2	acetyl-CoA carboxylase alpha	ACACA
723	10891	Q9UBK2	PPARG coactivator 1 alpha	PPARGC1A
724	10891	A0A024R9Q9	PPARG coactivator 1 alpha	PPARGC1A
725	1730	O60879	diaphanous related formin 2	DIAPH2
726	3751	A4D0V9	potassium voltage-gated channel subfamily D member 2	KCND2
727	3751	Q9NZV8	potassium voltage-gated channel subfamily D member 2	KCND2
728	9695	A0A024R2D5	ER degradation enhancing alpha-mannosidase like protein 1	EDEM1
729	9695	Q92611	ER degradation enhancing alpha-mannosidase like protein 1	EDEM1
730	6279	P05109	S100 calcium binding protein A8	S100A8
731	10721	O75417	DNA polymerase theta	POLQ
732	10721	Q59EE4	DNA polymerase theta	POLQ
733	10495	Q16206	ecto-NOX disulfide-thiol exchanger 2	ENOX2
734	10495	Q32ND0	ecto-NOX disulfide-thiol exchanger 2	ENOX2
735	57113	Q9HCX4	transient receptor potential cation channel subfamily C member 7	TRPC7
736	51725	Q9UH90	F-box protein 40	FBXO40
737	9515	B4DKF6	syntaxin binding protein 5L	STXBP5L
738	9515	E9PFI2	syntaxin binding protein 5L	STXBP5L
739	9515	Q9Y2K9	syntaxin binding protein 5L	STXBP5L
740	249	A0A024RAG0	alkaline phosphatase, biomineralization associated	ALPL
741	249	P05186	alkaline phosphatase, biomineralization associated	ALPL
742	846	P41180	calcium sensing receptor	CASR
743	1576	P08684	cytochrome P450 family 3 subfamily A member 4	CYP3A4
744	1576	Q6GRK0	cytochrome P450 family 3 subfamily A member 4	CYP3A4
745	213	P02768	albumin	ALB
746	5167	P22413	ectonucleotide pyrophosphatase/phosphodiesterase 1	ENPP1
747	1593	Q02318	cytochrome P450 family 27 subfamily A member 1	CYP27A1
748	1594	O15528	cytochrome P450 family 27 subfamily B member 1	CYP27B1
749	1591	Q07973	cytochrome P450 family 24 subfamily A member 1	CYP24A1
750	2184	P16930	fumarylacetoacetate hydrolase	FAH
751	250	B2R7C7	alkaline phosphatase, placental	ALPP
752	250	P05187	alkaline phosphatase, placental	ALPP
753	120227	Q6VVX0	cytochrome P450 family 2 subfamily R member 1	CYP2R1
754	8074	Q9GZV9	fibroblast growth factor 23	FGF23
755	2638	P02774	GC vitamin D binding protein	GC
756	5741	P01270	parathyroid hormone	PTH
757	4952	Q01968	OCRL inositol polyphosphate-5-phosphatase	OCRL
758	4952	Q504W7	OCRL inositol polyphosphate-5-phosphatase	OCRL
759	1184	A8K4H5	chloride voltage-gated channel 5	CLCN5
760	1184	P51795	chloride voltage-gated channel 5	CLCN5
761	1184	B3KRR2	chloride voltage-gated channel 5	CLCN5
762	1184	V9GYG7	chloride voltage-gated channel 5	CLCN5
763	1758	Q13316	dentin matrix acidic phosphoprotein 1	DMP1
764	5251	B4DWG8	phosphate regulating endopeptidase homolog X-linked	PHEX
765	5251	P78562	phosphate regulating endopeptidase homolog X-linked	PHEX
766	5251	B4DNS0	phosphate regulating endopeptidase homolog X-linked	PHEX
767	6569	Q06495	solute carrier family 34 member 1	SLC34A1
768	6569	A0A024R7R9	solute carrier family 34 member 1	SLC34A1
769	6569	Q7Z725	solute carrier family 34 member 1	SLC34A1
770	6569	Q86VN6	solute carrier family 34 member 1	SLC34A1
771	142680	Q8N130	solute carrier family 34 member 3	SLC34A3
772	632	P02818	bone gamma-carboxyglutamate protein	BGLAP
773	1834	Q9NZW4	dentin sialophosphoprotein	DSPP
774	56955	A0A024RDD1	matrix extracellular phosphoglycoprotein	MEPE
775	56955	Q8NC19	matrix extracellular phosphoglycoprotein	MEPE
776	56955	Q9NQ76	matrix extracellular phosphoglycoprotein	MEPE
788	55871	Q9BRT8	COBW domain containing 1	CBWD1
789	55871	A0A087X140	COBW domain containing 1	CBWD1
