# Supplementary material for: Ferulic acid in synergy with retinol alleviates oxidative injury of HaCaT cells during UVB-induced photoaging
Source: Aging (Albany NY). 2024 Apr 18;16(8):7153–73. doi: 10.18632/aging.205749 (PMC11087097; doi:10.18632/aging.205749)
Supplement: Supplementary Table 4 [file aging-16-205749-s004.xlsx]

## Sheet: Sheet1
Supplementary Table 4. 82 and 68 genes intersected by VA and FA at the target to skin aging.
name	UNIPROT
Ferulic acid	P23219
Ferulic acid	P35354
Ferulic acid	P29474
Ferulic acid	P23975
Ferulic acid	P25100
Ferulic acid	Q01959
Ferulic acid	P07550
Ferulic acid	P09960
Ferulic acid	P21397
Ferulic acid	P17538
Ferulic acid	P17612
Ferulic acid	P18089
Ferulic acid	P00749
Ferulic acid	P08238
Ferulic acid	P00918
Ferulic acid	P43166
Ferulic acid	P00915
Ferulic acid	P23280
Ferulic acid	O43570
Ferulic acid	Q9ULX7
Ferulic acid	Q16790
Ferulic acid	P35218
Ferulic acid	Q9Y2D0
Ferulic acid	P27338
Ferulic acid	P15121
Ferulic acid	P09917
Ferulic acid	P14780
Ferulic acid	P03956
Ferulic acid	P08253
Ferulic acid	P18031
Ferulic acid	Q8N1Q1
Ferulic acid	P07451
Ferulic acid	P05067
Ferulic acid	Q16236
Ferulic acid	P40763
Ferulic acid	P28845
Ferulic acid	Q92731
Ferulic acid	P22748
Ferulic acid	O00206
Ferulic acid	P08581
Ferulic acid	P04798
Ferulic acid	P05177
Ferulic acid	P16083
Ferulic acid	Q16678
Ferulic acid	P15085
Ferulic acid	P00533
Ferulic acid	P02766
Ferulic acid	B2RXH2
Ferulic acid	Q9Y4C1
Ferulic acid	O15054
Ferulic acid	Q9C0B1
Ferulic acid	O75164
Ferulic acid	Q9H3R0
Ferulic acid	Q9H4B7
Ferulic acid	Q04206
Ferulic acid	P06241
Ferulic acid	P06239
Ferulic acid	P53985
Ferulic acid	Q9NR96
Ferulic acid	O60218
Ferulic acid	P16050
Ferulic acid	Q02156
Ferulic acid	P13726
Ferulic acid	P35228
Ferulic acid	P08138
Ferulic acid	P11802
Ferulic acid	Q13509
Ferulic acid	P08183
Ferulic acid	P09467
Ferulic acid	P11388
Ferulic acid	Q04760
Ferulic acid	P56817
Ferulic acid	P12821
Ferulic acid	P00797
Ferulic acid	P09874
Ferulic acid	P35869
Ferulic acid	Q9Y2K7
Ferulic acid	P51580
Ferulic acid	P35222
Ferulic acid	P00734
Ferulic acid	Q86YT5
Ferulic acid	P42892
Ferulic acid	O15229
Ferulic acid	Q01432
Ferulic acid	Q9Y5Y4
Ferulic acid	P08473
Ferulic acid	P45983
Ferulic acid	P17516
Ferulic acid	P53396
Ferulic acid	P23919
Ferulic acid	O60502
Ferulic acid	P42330
Ferulic acid	P14174
Ferulic acid	P14920
Ferulic acid	Q9Y463
Ferulic acid	P17706
Ferulic acid	P06737
Ferulic acid	P11217
Ferulic acid	P00813
Ferulic acid	P49841
Ferulic acid	P25101
Ferulic acid	P05186
Ferulic acid	P10636
Ferulic acid	Q9NPH5
Ferulic acid	Q96RR4
Ferulic acid	Q9UNQ0
Ferulic acid	P17936
Retinol	O43318
Retinol	P22301
Retinol	P01375
Retinol	P17535
Retinol	P04040
Retinol	A0A140VJC8
Retinol	P36383
Retinol	P04798
Retinol	P41159
Retinol	P15502
Retinol	P21549
Retinol	P04746
Retinol	P22735
Retinol	P78540
Retinol	P10253
Retinol	Q9BYE2
Retinol	P06276
Retinol	P63096
Retinol	O76093
Retinol	Q14749
Retinol	O75019
Retinol	Q9UIG4
Retinol	P05090
Retinol	P41222
Retinol	Q96NR8
Retinol	Q92781
Retinol	Q8NBN7
Retinol	O94788
Retinol	O95237
Retinol	O75911
Retinol	P47895
Retinol	Q6NUM9
Retinol	Q8TC12
Retinol	Q9BTZ2
Retinol	Q9HBH5
Retinol	Q9NYR8
Retinol	P02753
Retinol	P18089
Retinol	P35398
Retinol	P10276
Retinol	P10826
Retinol	P13631
Retinol	P19793
Retinol	P28702
Retinol	P48443
Retinol	P28845
Retinol	P0DMS8
Retinol	P10275
Retinol	P32246
Retinol	P21730
Retinol	P21554
Retinol	P11511
Retinol	P30304
Retinol	P34913
Retinol	P03372
Retinol	Q92731
Retinol	P49810
Retinol	P47871
Retinol	Q12809
Retinol	P28482
Retinol	Q16539
Retinol	P11229
Retinol	P20309
Retinol	P08173
Retinol	P08912
Retinol	P51449
Retinol	Q05655
Retinol	P18031
Retinol	P41595
Retinol	P34972
Retinol	Q13133
Retinol	Q01959
Retinol	Q15722
Retinol	P35557
Retinol	O75582
Retinol	P49841
Retinol	P25116
Retinol	P56817
Retinol	P55055
Retinol	P04062
Retinol	P22303
Retinol	O75762
Retinol	P08185
Retinol	P11413
Retinol	P11712
Retinol	P08684
Retinol	Q9UBS5
Retinol	O15055
Retinol	O60674
Retinol	P22001
Retinol	P50416
Retinol	Q13093
Retinol	P42330
Retinol	P08069
Retinol	P06737
Retinol	P12931
Retinol	P35968
Retinol	P49146
Retinol	Q9UM73
Retinol	P00533
Retinol	Q9Y5Z0
Retinol	O00408
Retinol	P05129
Retinol	P05771
Retinol	Q02156
Retinol	P24723
Retinol	Q04759
Retinol	Q9Y233
Retinol	P35354
Retinol	Q99720
Retinol	Q14416
Retinol	P50579
Retinol	P35372
Retinol	P41145
Retinol	P22460
Retinol	Q99685
Retinol	P07333
Retinol	P48067
Retinol	P05067
Retinol	P25103
Retinol	Q00987
Retinol	P80365
Retinol	P32247
Retinol	P24557
Retinol	P14416
Retinol	P20292
Retinol	P30518
Retinol	P37288
Retinol	P52333
Retinol	P30559
Retinol	P10721
Retinol	P15104
Retinol	P10827
Retinol	Q05469
Skin aging	B4DN15
Skin aging	P03956
Skin aging	Q53G95
Skin aging	P15502
Skin aging	B4E3S4
Skin aging	E7ENM0
Skin aging	G5E950
Skin aging	Q8NBI4
Skin aging	G3V0G6
Skin aging	Q6ZUN2
Skin aging	E7EN65
Skin aging	Q59H17
Skin aging	B3KRT8
Skin aging	F8WAH6
Skin aging	O60493
Skin aging	B7ZAJ4
Skin aging	B0AZT2
Skin aging	D0PNI2
Skin aging	P28300
Skin aging	D2JYI1
Skin aging	P37173
Skin aging	A3QNQ0
Skin aging	Q01726
Skin aging	Q1JUL4
Skin aging	P35555
Skin aging	A0A0U3FYV6
Skin aging	P48431
Skin aging	Q15796
Skin aging	Q53XR6
Skin aging	B7Z5N5
Skin aging	O15105
Skin aging	B3KYA8
Skin aging	P05019
Skin aging	Q59GC5
Skin aging	Q5U743
Skin aging	Q13429
Skin aging	E9PFX5
Skin aging	Q4W448
Skin aging	D2KUA6
Skin aging	P37231
Skin aging	P08779
Skin aging	Q6UVK1
Skin aging	F1D8N3
Skin aging	Q92731
Skin aging	Q0PTK2
Skin aging	Q7LCB3
Skin aging	P29373
Skin aging	P56524
Skin aging	P08670
Skin aging	V9HWE1
Skin aging	P55064
Skin aging	P01033
Skin aging	Q6FGX5
Skin aging	B4DJK3
Skin aging	Q04695
Skin aging	Q14666
Skin aging	A0A024R849
Skin aging	Q63ZY2
Skin aging	Q99527
Skin aging	F6KD01
Skin aging	P60484
Skin aging	B4E1W8
Skin aging	P24821
Skin aging	Q4LE33
Skin aging	J3QSU6
Skin aging	A0A024RDT5
Skin aging	Q15063
Skin aging	B1ALD9
Skin aging	A0A024RDS2
Skin aging	Q16678
Skin aging	Q53TK1
Skin aging	A0A087WUF6
Skin aging	P09038
Skin aging	O43609
Skin aging	A0A024QZ34
Skin aging	P55083
Skin aging	Q13133
Skin aging	B4DXU5
Skin aging	F1D8N1
Skin aging	B5MBY7
Skin aging	P62937
Skin aging	V9HWF5
Skin aging	P35613
Skin aging	Q54A51
Skin aging	P08473
Skin aging	P63261
Skin aging	A0A024R757
Skin aging	Q2TNI1
Skin aging	Q59E85
Skin aging	Q7Z4F3
Skin aging	A9XTE5
Skin aging	Q03135
Skin aging	P68363
Skin aging	P05556
Skin aging	Q92819
Skin aging	P08254
Skin aging	P19525
Skin aging	Q8IW76
Skin aging	P32297
Skin aging	Q15306
Skin aging	Q08397
Skin aging	Q5H9S4
Skin aging	B4DR27
Skin aging	Q6ZN30
Skin aging	A4D1B1
Skin aging	P16671
Skin aging	B7Z6C3
Skin aging	E9PLT1
Skin aging	P14780
Skin aging	O00622
Skin aging	Q6FI18
Skin aging	Q9H3D4
Skin aging	C9D7D0
Skin aging	B7Z8X6
Skin aging	A0A0S2Z4N6
Skin aging	A0A141PNN3
Skin aging	A0A141PNN4
Skin aging	A0A0S2Z4N5
Skin aging	A0A140VKF3
Skin aging	P36955
Skin aging	K7PPA8
Skin aging	P04637
Skin aging	Q53GA5
Skin aging	H2EHT1
Skin aging	A0A087X1Q1
Skin aging	A0A087WXZ1
Skin aging	A0A087WT22
Skin aging	P04040
Skin aging	A0A024R452
Skin aging	P54764
Skin aging	P53667
Skin aging	F8WBA3
Skin aging	Q15139
Skin aging	Q13698
Skin aging	B1ALM3
Skin aging	O15360
Skin aging	Q13233
Skin aging	A0A0C4DFZ2
Skin aging	B4DVI5
Skin aging	P15289
Skin aging	P06681
Skin aging	Q53HP3
Skin aging	Q5JP69
Skin aging	B4DQI1
Skin aging	A0A0G2JL69
Skin aging	B4DV48
Skin aging	Q8N6L6
Skin aging	A0A024QZ20
Skin aging	Q13164
Skin aging	P16471
Skin aging	Q12913
Skin aging	Q9NPR5
Skin aging	P49792
Skin aging	A0A024R324
Skin aging	P61586
Skin aging	C9JX21
Skin aging	B4DKN9
Skin aging	C9JRM1
Skin aging	Q9BVT0
Skin aging	O76082
Skin aging	P45379
Skin aging	A0A0A0MRJ5
Skin aging	Q15607
Skin aging	B7Z6J1
Skin aging	A0A024R6C9
Skin aging	P36957
Skin aging	O15520
Skin aging	P30443
Skin aging	Q5SUL5
Skin aging	B1PKY1
Skin aging	B2R7U3
Skin aging	P04439
Skin aging	P35749
Skin aging	A0A024QZJ4
Skin aging	A0A024QZJ6
Skin aging	O75489
Skin aging	O15460
Skin aging	Q05DA4
Skin aging	P23760
Skin aging	A0A024R470
Skin aging	L7RRS0
Skin aging	O00443
Skin aging	B4DG55
Skin aging	Q13950
Skin aging	A0A0D9SEN7
Skin aging	Q32MY8
Skin aging	Q92854
Skin aging	Q9UHF7
Skin aging	A0A0S2Z4F1
Skin aging	B2R6M6
Skin aging	Q12805
Skin aging	A0A0S2Z3V1
Skin aging	P49770
Skin aging	Q53XC2
Skin aging	O19617
Skin aging	P10321
Skin aging	Q6R739
Skin aging	Q95HC2
Skin aging	Q9H015
Skin aging	O43597
Skin aging	Q9GZT5
Skin aging	A0A024R4X4
Skin aging	Q9Y259
Skin aging	Q8NF50
Skin aging	E2J6M5
Skin aging	E2J6M6
Skin aging	Q04743
Skin aging	A0A0A0MR51
Skin aging	O60427
Skin aging	O95864
Skin aging	F5H2A4
Skin aging	F5H6H0
Skin aging	Q1M183
Skin aging	P52926
Skin aging	A0A024RBC0
Skin aging	P21583
Skin aging	A0A024RBF5
Skin aging	A0A024R4H0
Skin aging	Q02809
Skin aging	O75626
Skin aging	B4DW27
Skin aging	Q5T4E8
Skin aging	Q16769
Skin aging	O15440
Skin aging	Q9BT22
Skin aging	A9UGY9
Skin aging	Q7Z3H3
Skin aging	Q9H1Y0
Skin aging	P30532
Skin aging	Q6EWN4
Skin aging	H0YM98
Skin aging	Q53G01
Skin aging	Q9NZA1
Skin aging	Q49AE1
Skin aging	Q92620
Skin aging	Q9NSD9
Skin aging	Q02363
Skin aging	Q53T66
Skin aging	Q04671
Skin aging	P20142
Skin aging	P25789
Skin aging	H0YLC2
Skin aging	H0YN18
Skin aging	Q495M3
Skin aging	A0A024RDG0
Skin aging	Q9C0K1
Skin aging	P31213
Skin aging	A0A024R704
Skin aging	P78362
Skin aging	A0A140VJE7
Skin aging	O43747
Skin aging	Q8IY97
Skin aging	Q14781
Skin aging	P04141
Skin aging	P58012
Skin aging	Q53ZD3
Skin aging	Q14678
Skin aging	P48742
Skin aging	Q58F18
Skin aging	Q9UHC1
Skin aging	Q2M1Z1
Skin aging	Q9H3L0
Skin aging	P82650
Skin aging	O75431
Skin aging	A4Z6T7
Skin aging	P11245
Skin aging	Q9NXR1
Skin aging	X5DR54
Skin aging	X5DP35
Skin aging	P56589
Skin aging	P49763
Skin aging	Q86TW6
Skin aging	G3XA84
Skin aging	Q53XY6
Skin aging	Q13835
Skin aging	A0A024R952
Skin aging	Q9UIW2
Skin aging	B2RAH7
Skin aging	P48147
Skin aging	P54821
Skin aging	A0A0S2Z4F8
Skin aging	Q13702
Skin aging	A0A0S2Z4M9
Skin aging	A0A0S2Z4A6
Skin aging	A0A0S2Z4A2
Skin aging	O95977
Skin aging	Q8NB90
Skin aging	A0A024R4D4
Skin aging	Q8WVJ9
Skin aging	Q9HC78
Skin aging	B2RCW4
Skin aging	Q9UFZ4
Skin aging	Q9UKP4
Skin aging	Q02952
Skin aging	Q86TJ9
Skin aging	Q14155
Skin aging	Q5W9H1
Skin aging	A0A024RDY9
Skin aging	B7Z6G2
Skin aging	B7Z344
Skin aging	E9PDQ5
Skin aging	B4DKX1
Skin aging	B4E3T1
Skin aging	Q9Y2G3
Skin aging	A0A024R4V5
Skin aging	O95696
Skin aging	A0A024R4W4
Skin aging	Q59G93
Skin aging	A0A0S2Z5B2
Skin aging	O00257
Skin aging	F1T0F7
Skin aging	P29762
Skin aging	Q9UNE0
Skin aging	Q96F86
Skin aging	Q9BTY2
Skin aging	Q9UM11
Skin aging	P30679
Skin aging	Q9ULH0
Skin aging	Q4ZG40
Skin aging	Q9UEW3
Skin aging	B4DUT9
Skin aging	B7Z8M1
Skin aging	F5H7Q8
Skin aging	Q29980
Skin aging	A0A0G2JHB5
Skin aging	X6R344
Skin aging	Q9UBU8
Skin aging	B3KMR4
Skin aging	Q8N2W9
Skin aging	P43351
Skin aging	Q5DR82
Skin aging	B7Z5Q6
Skin aging	B7Z2G8
Skin aging	F5GX32
Skin aging	Q8IUU5
Skin aging	A8K270
Skin aging	Q13972
Skin aging	B2R838
Skin aging	P61587
Skin aging	A4D105
Skin aging	P35244
Skin aging	Q9UI40
Skin aging	P51811
Skin aging	Q6UXH1
Skin aging	Q05925
Skin aging	P00739
Skin aging	Q8IVH4
Skin aging	B7Z4T6
Skin aging	P08651
Skin aging	A0A0S2Z4N4
Skin aging	P50479
Skin aging	Q6ZVD8
Skin aging	Q7L804
Skin aging	B4E1H0
Skin aging	A0A024RD67
Skin aging	O75486
Skin aging	Q6EMB2
Skin aging	A0A140VK05
Skin aging	B4DN86
Skin aging	Q92667
Skin aging	Q9UK58
Skin aging	Q9UKI2
Skin aging	O95208
Skin aging	O60291
Skin aging	P42568
Skin aging	A0A0S2Z448
Skin aging	Q2L696
Skin aging	P80303
Skin aging	V9HW75
Skin aging	Q5VYX0
Skin aging	B4DJW3
Skin aging	Q86WG5
Skin aging	Q9UMX9
Skin aging	D6RGY6
Skin aging	A0A076YGN1
Skin aging	Q8WXH0
Skin aging	Q6MZP0
Skin aging	Q86VP1
Skin aging	B4DSG5
Skin aging	Q495A1
Skin aging	Q7Z7G0
Skin aging	P07311
Skin aging	G3V2U7
Skin aging	E7EMD6
Skin aging	A0A0S2Z4Z7
Skin aging	O43572
Skin aging	Q9HC52
Skin aging	Q92879
Skin aging	G5EA30
Skin aging	Q6ZMG9
Skin aging	B3KTV8
Skin aging	I6S2Y9
Skin aging	Q9UJM3
Skin aging	Q68DA7
Skin aging	H0YM30
Skin aging	Q86VQ1
Skin aging	P53990
Skin aging	B4DXC9
Skin aging	Q86VZ6
Skin aging	O00515
Skin aging	Q68G74
Skin aging	Q9Y316
Skin aging	A8K3Y8
Skin aging	B4DG30
Skin aging	Q9UL63
Skin aging	Q6IBW4
Skin aging	P53370
Skin aging	B4DG76
Skin aging	O15031
Skin aging	B3KRC4
Skin aging	Q9NYI0
Skin aging	Q9UKM9
Skin aging	Q53GL6
Skin aging	Q6NUK4
Skin aging	X5DR89
Skin aging	X5DP57
Skin aging	Q9BQ70
Skin aging	B3KR55
Skin aging	P17027
Skin aging	B4DLS2
Skin aging	Q9Y576
Skin aging	B9A047
Skin aging	Q9NXG0
Skin aging	B1AMC8
Skin aging	B3KR21
Skin aging	Q8IWJ2
Skin aging	A0A146E5L3
Skin aging	O14498
Skin aging	B4DGY6
Skin aging	Q9NV92
Skin aging	Q9Y314
Skin aging	A0A075B6F9
Skin aging	Q9GZN7
Skin aging	Q9NPG3
Skin aging	Q70CQ1
Skin aging	Q9ULM3
Skin aging	A8MYG7
Skin aging	B4DEW0
Skin aging	Q9UPM9
Skin aging	A0A0B4J223
Skin aging	A8MTX4
Skin aging	Q6TFL4
Skin aging	Q8WZ60
Skin aging	Q8N3X6
Skin aging	B4DSW0
Skin aging	F5H1M8
Skin aging	Q96MG8
Skin aging	A0A024R7U8
Skin aging	B7Z927
Skin aging	Q6S5L8
Skin aging	A7E2A5
Skin aging	Q8WZ64
Skin aging	Q9NXU5
Skin aging	Q8N8E3
Skin aging	F5GYE8
Skin aging	Q9BRQ6
Skin aging	Q8NET6
Skin aging	Q6ZN54
Skin aging	Q9BU89
Skin aging	A0A024R9C2
Skin aging	P28324
Skin aging	Q8IXL1
Skin aging	A0A024R997
Skin aging	A0A140VJJ7
Skin aging	O43559
Skin aging	Q49A26
Skin aging	Q9NZ78
Skin aging	D3DUE6
Skin aging	Q9P0W2
Skin aging	Q86VF2
Skin aging	B0AZU0
Skin aging	Q6ZWT7
Skin aging	B7Z3I3
Skin aging	Q86YR7
Skin aging	Q9Y4C4
Skin aging	Q6NUT3
Skin aging	B7ZM40
Skin aging	Q86YN6
Skin aging	A1KZ92
Skin aging	Q9ULX5
Skin aging	B4DSP6
Skin aging	Q9Y6S9
Skin aging	Q8WWL2
Skin aging	Q53HB6
Skin aging	Q9UBI4
Skin aging	H3BST3
Skin aging	Q9H4I2
Skin aging	O75541
Skin aging	A0A0C4DH12
Skin aging	A0A087WXX1
Skin aging	Q2QGD7
Skin aging	Q7Z6V5
Skin aging	P0C7T5
Skin aging	B4DF88
Skin aging	Q8NFJ8
Skin aging	O00193
Skin aging	A0A024RCW8
Skin aging	O77932
Skin aging	Q9BYG8
Skin aging	Q8NHY5
Skin aging	Q96A59
Skin aging	Q8NEF9
Skin aging	Q7Z3E1
Skin aging	Q05BQ2
Skin aging	Q9Y330
Skin aging	Q9BXJ3
Skin aging	B3KXG5
Skin aging	O94915
Skin aging	Q6ZR29
Skin aging	B2R7I9
Skin aging	O14966
Skin aging	Q6FGU7
Skin aging	G1UCX3
Skin aging	Q96ER3
Skin aging	O43304
Skin aging	Q495N2
Skin aging	A0A024R6E6
Skin aging	Q53FD0
Skin aging	J3KMY6
Skin aging	Q96M89
Skin aging	J3KP02
Skin aging	D3DNK7
Skin aging	Q68D85
Skin aging	Q6IFH4
Skin aging	Q3B8N5
Skin aging	G3V3G0
Skin aging	Q6ZSC3
Skin aging	P60896
Skin aging	Q6IBB7
Skin aging	Q9Y2W3
Skin aging	Q9C0D4
Skin aging	Q5XKK7
Skin aging	A2RU49
Skin aging	Q7Z443
Skin aging	O14669
Skin aging	Q9NWC5
Skin aging	J3KQ06
Skin aging	Q8NCF0
Skin aging	Q6ZMT9
Skin aging	M0R2M9
Skin aging	Q7Z4M0
Skin aging	H0YKR2
Skin aging	A0A140VJU2
Skin aging	Q8IYM1
Skin aging	Q3KP66
Skin aging	Q96Q35
Skin aging	A8K8B8
Skin aging	Q5TGP6
Skin aging	Q86YV5
Skin aging	O75264
Skin aging	Q96NB1
Skin aging	I3L2N4
Skin aging	I3NI25
Skin aging	I3L269
Skin aging	I3L4V2
Skin aging	Q8N468
Skin aging	Q96KX6
Skin aging	Q6ZUU3
Skin aging	Q6ZRP0
Skin aging	A8K0Z3
Skin aging	A0A1U9AC72
Skin aging	K7EJ46
Skin aging	A6NCJ1
Skin aging	A4D104
Skin aging	C9J7I0
Skin aging	P02452
Skin aging	P01137
Skin aging	P35354
Skin aging	Q92482
Skin aging	I6L9H2
Skin aging	P26358
Skin aging	Q59FP7
Skin aging	Q16236
Skin aging	P08246
Skin aging	P10276
Skin aging	Q6I9R7
Skin aging	F1D8N9
Skin aging	A8K840
Skin aging	A8MUP8
Skin aging	P05412
Skin aging	P07476
Skin aging	B4DUF7
Skin aging	P22004
Skin aging	Q4VBA3
Skin aging	P07585
Skin aging	Q6FH10
Skin aging	A0A024RBG6
Skin aging	F1D8P8
Skin aging	P11473
Skin aging	Q9UEF7
Skin aging	A0A024RDE6
Skin aging	P10451
Skin aging	A0A024RDE2
Skin aging	A0A024RDJ0
Skin aging	Q3LGB0
Skin aging	B7Z351
Skin aging	A0A286YF97
Skin aging	P53779
Skin aging	Q499Y8
Skin aging	A8MWW6
Skin aging	A0A1P0B7D2
Skin aging	A0A286YFD7
Skin aging	A0A286YEQ7
Skin aging	D6RJF9
Skin aging	A0A286YFN2
Skin aging	A0A286YES0
Skin aging	I6L9F3
Skin aging	A0A286YF02
Skin aging	D6RCB1
Skin aging	A0A024R2Y7
Skin aging	O43820
Skin aging	P00441
Skin aging	V9HWC9
Skin aging	P20930
Skin aging	P23490
Skin aging	P28482
Skin aging	Q1HBJ4
Skin aging	Q499G7
Skin aging	P16278
Skin aging	B7Z6Q5
Skin aging	P29279
Skin aging	Q5M8T4
Skin aging	P01100
Skin aging	Q6FG41
Skin aging	P26367
Skin aging	Q66SS1
Skin aging	F1T0F8
Skin aging	D1KF47
Skin aging	A0A1W2PRA8
Skin aging	F1T0D1
Skin aging	P32243
Skin aging	F1T0C9
Skin aging	F1T0D0
Skin aging	P58304
Skin aging	Q9Y2V3
Skin aging	K7PML8
Skin aging	P42771
Skin aging	Q8N726
Skin aging	G3XAG3
Skin aging	P18146
Skin aging	Q546S1
Skin aging	P08253
Skin aging	A0A024R6R4
Skin aging	P28845
Skin aging	X5D2L1
Skin aging	P84022
Skin aging	A0A024R5Z3
Skin aging	Q9P0T0
Skin aging	B4DVM1
Skin aging	P05231
Skin aging	Q75MH2
Skin aging	B5MC21
Skin aging	B4DNQ5
Skin aging	P13611
Skin aging	Q86W61
Skin aging	A0A024RAL1
Skin aging	Q6MZK8
Skin aging	A0A024RAP3
Skin aging	A0A024RAQ9
Skin aging	Q59FG9
Skin aging	P01584
Skin aging	P01583
Skin aging	A0A024RCX5
Skin aging	P38936
Skin aging	E7DVW5
Skin aging	Q01469
Skin aging	Q504U8
Skin aging	E7BSV0
Skin aging	F2YGG7
Skin aging	E9PFD7
Skin aging	B7Z2I3
Skin aging	P00533
Skin aging	A0A1U9X785
Skin aging	B4DNX3
Skin aging	Q15109
Skin aging	A0A024R730
Skin aging	P13569
Skin aging	P02461
Skin aging	P98095
Skin aging	Q86V58
Skin aging	Q9Y3V7
Skin aging	O14746
Skin aging	P02545
Skin aging	Q5TCI8
Skin aging	A0A024R274
Skin aging	Q13485
Skin aging	A0A0S2Z3H5
Skin aging	P08123
Skin aging	P09237
Skin aging	Q12891
Skin aging	Q9UJ68
Skin aging	Q9NZV6
Skin aging	P12004
Skin aging	P01213
Skin aging	Q8N6T7
Skin aging	B4DDV3
Skin aging	M0QXA0
Skin aging	M0R1N9
Skin aging	P55001
Skin aging	A0A024RA94
Skin aging	P14210
Skin aging	P45452
Skin aging	Q53H33
Skin aging	B4DZT3
Skin aging	P20700
Skin aging	P39900
Skin aging	Q8NER1
Skin aging	E2QRB3
Skin aging	A0A024R8U9
Skin aging	P32322
Skin aging	J3QL32
Skin aging	Q8TBX0
Skin aging	A0A0U5J797
Skin aging	Q92838
Skin aging	P19957
Skin aging	B2ZZ90
Skin aging	Q13085
Skin aging	Q7Z5W8
Skin aging	A0A024R0Y2
Skin aging	Q9UBK2
Skin aging	A0A024R9Q9
Skin aging	O60879
Skin aging	A4D0V9
Skin aging	Q9NZV8
Skin aging	A0A024R2D5
Skin aging	Q92611
Skin aging	P05109
Skin aging	O75417
Skin aging	Q59EE4
Skin aging	Q16206
Skin aging	Q32ND0
Skin aging	Q9HCX4
Skin aging	Q9UH90
Skin aging	B4DKF6
Skin aging	E9PFI2
Skin aging	Q9Y2K9
Skin aging	A0A024RAG0
Skin aging	P05186
Skin aging	P41180
Skin aging	P08684
Skin aging	Q6GRK0
Skin aging	P02768
Skin aging	P22413
Skin aging	Q02318
Skin aging	O15528
Skin aging	Q07973
Skin aging	P16930
Skin aging	B2R7C7
Skin aging	P05187
Skin aging	Q6VVX0
Skin aging	Q9GZV9
Skin aging	P02774
Skin aging	P01270
Skin aging	Q01968
Skin aging	Q504W7
Skin aging	A8K4H5
Skin aging	P51795
Skin aging	B3KRR2
Skin aging	V9GYG7
Skin aging	Q13316
Skin aging	B4DWG8
Skin aging	P78562
Skin aging	B4DNS0
Skin aging	Q06495
Skin aging	A0A024R7R9
Skin aging	Q7Z725
Skin aging	Q86VN6
Skin aging	Q8N130
Skin aging	P02818
Skin aging	Q9NZW4
Skin aging	A0A024RDD1
Skin aging	Q8NC19
Skin aging	Q9NQ76
Skin aging	Q9BRT8
Skin aging	A0A087X140
