# Supplementary material for: Ferulic acid in synergy with retinol alleviates oxidative injury of HaCaT cells during UVB-induced photoaging
Source: Aging (Albany NY). 2024 Apr 18;16(8):7153–73. doi: 10.18632/aging.205749 (PMC11087097; doi:10.18632/aging.205749)
Supplement: Supplementary Table 5 [file aging-16-205749-s005.xlsx]

## Sheet: Sheet1
Supplementary Table 5. 252 DEGs in skin aging of GSE155789 dataset.
up.genes			GSM4712081	GSM4712082	GSM4712083	GSM4712084	GSM4712085	GSM4712086	GSM4712087	GSM4712088
LTB		ABHD3	-0.731962	-0.71944	-0.646963	-0.488275	-0.0848731	0.0996299	0.00790727	0.113021
GJB6		ACKR3	-0.00826018	-0.00636947	-0.00821353	0.0243159	1.70083	1.70083	1.55726	1.4894
SPRR1B		ACP6	-0.85009	-0.440529	-0.919599	-0.472837	0.0117883	-0.132275	-0.233101	0.138859
SPRR1A		ADA	-1.33949	-1.1804	-1.00094	-0.85009	0.0877762	-0.00571883	0.0919019	-0.0323101
KRTDAP		ADAMTS1	1.6695	1.52787	1.87594	1.36768	0.433461	0.700085	0.931954	0.518555
NTM		ADIRF	-0.855009	-0.779287	-0.663484	-0.411504	0.366075	0.248175	0.247974	0.373791
SERPINE2		ADM	-0.459954	-0.481949	-0.545588	-0.220494	0.725066	0.773626	0.537138	0.785803
SPRR2E		ADRB2	0.819224	0.836026	1.06725	0.937827	0.0383159	-0.00131116	-0.14806	-0.060129
SPRR2A		AKAP12	-1.48565	-1.40123	-1.41849	-1.33949	-0.311649	-0.243485	-0.314004	-0.178373
MFAP5		ALDH1A3	-2.75549	-2.75549	-2.41333	-2.41333	0.140497	0.156205	0.0718857	0.143211
PTGS2		ANGPTL4	-3.7995	-3.37342	-3.65034	-3.7995	-0.404927	-0.813492	-0.649026	-0.813492
SH2D5		ANXA11	-0.888398	-0.85009	-0.703868	-0.457859	0.0817487	0.0876724	-0.0465525	-0.00893521
FBN2		APOBEC3B	-2.21556	-2.11792	-2.21556	-2.25205	-0.0509608	-0.0352919	-0.302564	-0.0308756
CNFN		AQP3	-1.14713	-1.36898	-1.40123	-0.715119	0.0500602	-0.0717008	-0.122308	0.3932
LYAR		ARG2	0.693836	0.672955	0.755302	0.836026	-0.219269	-0.481886	-0.444916	-0.241616
NRG1		ARHGAP8	-1.11651	-1.11651	-0.731962	-1.17081	-0.384293	-0.285569	-0.168899	0.0329102
ODC1		ARHGEF28	0.804402	0.67164	0.937827	0.870575	0.164163	0.115208	0.089731	0.219469
CPA4		ATP1B1	-0.987283	-0.925734	-0.888398	-0.580937	0.12372	0.0436952	0.00870335	0.145391
VIM		ATP8B1	-0.239389	-0.110441	-0.650833	-0.416693	0.351514	0.391601	0.00285661	0.284939
PI3		BDH1	0.563939	0.67619	0.632015	1.03651	0.186216	0.0460483	0.0113759	0.0211401
ARG2		BHLHE40	-1.17081	-1.24852	-1.04504	-0.779287	-0.0777633	0.0758698	-0.190356	-0.00164044
ADRB2		BIK	-1.23472	-1.33949	-1.35324	-0.931839	-0.120841	-0.269032	-0.275773	0.439439
EDN1		BMP1	0	0	0	0	0.422906	0.483801	0.719941	0.742564
SBSN		C11ORF80	-0.688114	-0.574698	-0.4265	-1.35324	-0.113307	-0.0980411	-0.144632	0.136018
THBS1		C15ORF48	-1.70772	-1.66104	-1.28908	-1.28908	-0.0743737	-0.010886	0.167272	-0.106315
IRS1		C1RL	-0.222077	-0.412435	-0.44954	-0.112134	0.348289	0.302859	0.200031	0.37355
MROH6		C1ORF74	-0.561688	-0.219002	-0.411216	-0.283062	0.277739	0.189948	0.254232	0.336907
PTGS1		C3	-0.981493	-0.919599	-0.855009	-0.575735	-0.110963	-0.347141	-0.133517	-0.0421623
TAGLN		C8ORF48	-0.466244	-0.188858	-0.44144	-0.385131	0.326738	0.343499	0.119941	0.167153
TREM2		C9ORF16	-0.491215	-0.33865	-0.300641	-0.343903	0.281737	0.0368201	0.276622	0.297709
PYCR1		CA12	1.0821	1.093	1.21616	1.46491	0.516611	0.368448	0.331682	0.375848
PTHLH		CA2	-1.44813	-1.31774	-1.49909	-1.80911	0.18037	-0.0126619	0.00679052	0.27556
ARHGEF28		CALML3	0	0	0	0	0.761602	0.735466	0.852519	0.591755
CLDN1		CAMK2N1	-1.66104	-1.80911	-1.70772	-1.18732	-0.173073	-0.384293	-0.412663	-0.212937
SRM		CBR3	-0.659478	-0.688114	-0.769076	-0.410961	0.19773	0.135209	0.0916296	0.099126
MRTO4		CCBE1	0.577643	0.580072	0.693836	0.258269	-0.0613575	-0.0374719	-0.10434	-0.0399629
LYNX1		CD320	0.307138	0.44726	0.185137	0.0379611	0.0970618	-0.710039	-0.798251	-0.159861
SPRR2B		CD55	0.778139	1.10827	0.505785	0.819224	0.219424	0.129746	0.0454659	0.0165693
LRP8		CELSR2	-0.322415	-0.142425	-0.322147	-0.128984	0.613043	0.50009	0.592639	0.634136
DUSP5		CHST11	-1.36898	-1.14713	-1.2613	-0.764582	0.202011	0.0167909	0.115048	0.176124
SPRR2D		CLDN1	1.71708	1.71708	1.28761	1.54962	0.372339	0.501114	0.441053	0.5084
MN1		CLDN7	-2.25205	-2.25205	-1.97781	-1.8719	-0.232658	-0.564296	-0.327823	-0.206025
FAM216A		CLU	0	0	0	0	1.29213	1.09783	1.4894	0.9914
CA12		CMPK2	0.00888741	0	0	0.0141564	0.606326	0.687536	0.555765	0.552849
HYLS1		CMTM7	-0.862461	-0.910188	-0.677251	-0.510111	-0.100163	-0.141259	-0.146078	-0.161569
EMP3		CNFN	1.36768	1.32077	1.54962	1.71708	0.00854015	0.0124872	1.3125e-06	0.0130129
PPAN		COA7	0.385848	0.158315	0.477328	0.407001	-0.0942943	-0.234562	-0.228943	-0.406509
NUAK1		CORO6	-1.03162	-0.866356	-0.642489	-0.413807	0.0867213	0.181989	0.282556	-0.0239923
SKP2		CPA4	1.86163	1.76659	1.86163	1.92914	0.931954	0.80245	1.05173	0.852519
KIF6		CRABP2	-0.00992115	-0.00774533	-0.0117579	-3.65e-05	2.25672	2.25672	2.45365	1.70083
COA7		CREBRF	1.07175e-06	0.18272	-0.00742518	0.0495902	0.731901	0.796655	0.779532	0.746268
FJX1		CREG1	-1.01251	-1.04504	-0.981493	-0.608168	0.195174	0.134322	0.00344217	0.196683
IGFL1		CST6	-1.8719	-1.70772	-6.54605	-6.54605	0.600499	0.361609	0.404569	0.568795
ADAMTS1		CTSD	-0.674527	-0.63555	-0.403555	-0.259887	0.295145	0.203566	0.295145	0.280293
SLPI		CTSO	-0.0199066	-0.0149622	-0.0213752	-0.00174546	0.746268	0.479561	0.654743	0.931954
CCBE1		CXCL14	1.97864	1.97864	1.76659	2.18127	3.80524	3.80524	3.80524	2.45365
PID1		CXXC5	0.311703	0.387354	0.380993	0.197057	1.00478	0.962779	0.750084	0.962779
MCM10		CYP27C1	0.104417	0.00716257	-0.499692	-0.63555	0.657688	0.493454	0.0365422	0.358917
TNF		CYSRT1	-1.97781	-1.97781	-1.94349	-1.61041	-0.165632	-0.74327	-0.159267	-0.349554
BDH1		DLK2	-1.28908	-1.23472	-1.36898	-0.858785	-0.20634	-0.330972	-0.318928	-0.0856808
LETM2		DRAM1	-0.268755	-0.261002	-0.537999	-0.203281	0.437266	0.49685	0.184879	0.433461
CD55		DTX4	-0.836527	-1.01251	-0.727583	-0.395653	-0.0432153	-0.0195725	0.122536	0.0647196
PTPRZ1		DUSP10	-1.1804	-0.878949	-1.05635	-1.08809	0.33464	0.185375	0.17573	0.311611
IVL		DUSP5	0.782217	0.906566	0.682205	0.69507	0.237987	-0.00608695	0.0622137	0.0376499
FGFR3		EDN1	1.03651	0.989008	1.10827	1.0821	0.0485181	0.285103	0.0730222	-0.0141904
TEAD4		EFHD2	-1.41849	-1.40898	-1.23472	-0.973385	-0.110205	-0.215875	-0.0901514	-0.018321
MYBL1		EFNA1	-0.108406	-0.200105	-0.204789	0.108028	0.545752	0.450091	0.406804	0.579944
STAMBPL1		EHBP1L1	-0.910188	-0.888398	-0.534301	-0.707088	-0.0364071	-0.228722	-0.13889	0.158196
SLC43A3		EMP1	-0.973385	-1.03162	-0.952221	-0.589567	-0.178	-0.0867865	-0.225699	-0.132695
STC2		EMP3	0.431214	0.526986	0.728403	0.672955	0.0437907	-0.150515	-0.185391	-0.0795406
PAG1		EREG	-0.528534	-0.669857	-0.694255	-0.469274	0.0343142	0.0645018	0.0127698	0.242589
CD320		ETS2	-0.388651	-0.352608	-0.335836	-0.161293	0.288718	0.475572	0.1576	0.460543
KRT15		FAM210B	-0.683424	-0.641114	-0.644496	-0.44954	-0.0100698	-0.0471661	-0.0339166	0.0255535
NRIP1		FAM216A	0.639892	0.626639	0.845506	0.956849	0.0699911	0.061658	0.0001595	-0.0236677
ACKR3		FAM3C	-1.27022	-1.41849	-1.40898	-1.02069	-0.0694886	0.0445299	-0.162547	-0.0204296
APOBEC3B		FAM83F	-0.931839	-0.764582	-1.02069	-1.47386	-0.102956	-0.259637	0.00856328	0.11376
ALDH1A3		FAM89B	-1.06391	-1.35324	-1.20829	-2.21556	-0.158747	-0.226514	-0.132561	0.123382
AKAP12		FAP	-1.80911	-1.8719	-1.80911	-1.66104	-0.0971209	-0.361639	-0.399211	-0.0819858
MAF		FAT2	-0.214823	-0.299356	-0.307615	-0.136869	0.391369	0.415734	0.305626	0.414176
FBXO32		FBN2	0.838335	0.870575	0.812153	0.665396	0	0	0	0
IFIT3		FBXO32	-3.43655	-3.7995	-3.37342	-3.43655	0.314905	0.217724	-0.124131	0.376985
ANGPTL4		FGFR3	0.668818	0.439219	0.369051	1.04527	0.00965191	0.0144725	7.975e-06	0.017522
SLC2A12		FGGY	-0.776474	-0.428127	-0.737052	-0.479342	0.354515	0.442009	0.0133394	0.360834
TMEM79		FHL2	-0.459133	-0.620523	-0.453528	-0.263863	0.365691	0.229588	0.189506	0.348985
IGFBP6		FHOD3	-0.830788	-0.836527	-0.806554	-0.517654	0.013335	-0.00183916	0.30839	0.26775
SPOCD1		FJX1	0.747632	0.781063	0.626639	0.417155	0.0152987	0.114955	-0.171018	0.0262457
TMCC3		FOXC1	-0.815415	-0.896287	-1.11651	-0.756614	0.0360457	-0.0854249	0.0779916	0.105987
CMPK2		FYB1	-0.858785	-0.858785	-0.858785	-0.534301	-0.191125	-0.169987	-0.0295291	0.0578121
DUSP10		GABARAPL1	-0.193878	-0.130652	-0.230469	-0.142096	0.872053	0.192549	0.631284	0.479561
LCN2		GATA6	-0.394447	-0.424025	-0.910188	-0.579377	0.136836	0.246667	-0.172356	0.195059
TPM1		GJB6	1.52787	1.54962	1.49877	1.6695	0.425357	0.318715	0.395395	0.348289
PXDC1		GPNMB	-0.207404	0.0142989	-0.296035	-0.0998379	1.05173	1.29213	1.29213	1.11303
IL1B		GPR137B	-0.464489	-0.579377	-1.1804	-1.49909	0.0140159	0.212184	0.212184	0.131503
FAP		GPRC5A	-2.41333	-2.41333	-2.06693	-1.94349	-0.249499	-0.232658	-0.33764	-0.155861
GPRC5A		GPX4	-0.715119	-0.700941	-0.492783	-0.308249	0.100578	0.0157734	-0.0651003	0.197114
CREBRF		GSE1	-0.558946	-0.445877	-0.352163	-0.339479	0.172528	0.0520957	0.107132	0.365931
TNFSF10		HBEGF	-0.964765	-0.820927	-0.987283	-0.614933	0.355421	0.0739576	0.154788	0.273461
MYO1E		HCAR2	-6.54605	-6.54605	-3.7995	-3.65034	-0.205213	-0.335532	-0.308186	-0.00736358
P2RY2		HMGA1	-1.08809	-1.14188	-1.03162	-0.674527	-0.116535	-0.302564	-0.144163	-0.0916055
GPNMB		HSD17B8	-0.703868	-0.769076	-0.49066	-0.235281	0.173929	-0.016103	0.208561	0.132393
CLDN7		HYLS1	0.427274	0.373565	0.427513	0.571343	-0.225699	-0.0869579	-0.288777	-0.0320202
CALML3		ICAM1	-0.806554	-0.815415	-0.669857	-0.459133	0.331166	0.0528368	0.267893	0.150438
CRABP2		ID1	-3.17135	-3.43655	-2.75549	-2.53421	-0.0856032	-0.275961	-0.434771	-0.0965595
CELSR2		IFIT3	-0.0659852	-0.140443	-0.0139199	-0.0490444	0.59653	0.591755	0.568795	0.586598
KRT13		IGFBP6	-3.37342	-3.17135	-3.17135	-2.75549	-0.177531	-0.182124	-0.428394	-0.0372969
NET1		IGFL1	3.03097	2.67848	2.44231	3.03097	1.4894	1.39975	1.92738	1.29213
CA2		IGFL2	-0.727583	-0.703868	-0.673059	-0.758535	-0.323015	0.0976356	0.0089494	-0.0835767
FAT2		IL1B	-1.54596	-1.57749	-1.54596	-1.2613	0.013312	-0.179784	-0.0736529	-0.0039562
PARP14		IRS1	1.16987	1.01132	1.093	1.1547	0.288659	0.403961	0.148936	0.239091
ST6GALNAC2		ISG20	-0.194629	0.0637221	-0.606057	-0.727583	0.692549	0.301795	0.405093	0.388092
OLR1		ITGB6	-1.14188	-1.2613	-1.31774	-0.871539	-0.0403063	-0.0177722	-0.239195	0.0990073
ID1		IVL	0.393161	0.409844	0.870575	0.882289	-0.0602509	-0.00656894	0.02668	0.0869744
ADM		KCNN4	-1.16084	-1.28908	-0.925734	-0.632374	0.0347093	-0.0296985	0.0451494	-0.0242493
SEMA3B		KDM3A	-0.33865	-0.358576	-0.385131	-0.213547	0.345511	0.606326	0.211621	0.279593
WNT10A		KIF6	0.674416	0.882289	0.836026	0.725935	0	0.355231	0.248321	0.0457386
FAM3C		KLF10	-0.502006	-0.312119	-0.459133	-0.376422	0.215457	0.293815	0.0258174	0.186939
RHCG		KLF7	-0.725453	-0.793911	-0.481949	-0.363273	0.13022	0.0160743	0.0916611	0.263548
PTAFR		KRT13	-0.00914095	-0.00735509	-0.00968183	-9.425e-06	1.2124	1.00478	1.39975	1.05173
SAMD9		KRT15	-3.65034	-3.65034	-3.43655	-3.37342	0.218294	0.230648	0.131485	0.324826
UBA7		KRT6B	-0.925734	-0.964765	-0.878949	-0.526313	-0.0214179	-0.0272883	-0.0450602	-0.0160776
C15ORF48		KRT80	-1.94349	-1.94349	-1.8719	-1.57749	-0.295232	-0.621671	-0.449048	-0.173389
SIK1		KRTDAP	3.79587	3.27703	3.27703	3.79587	0	-4.775e-07	5.95e-07	0.0124946
KRT80		LCN2	-1.40898	-1.27022	-1.14713	-1.05635	0.0837131	0.151209	0.13492	0.199259
CLU		LETM2	0.863032	0.944924	0.906566	0.468616	0.27505	0	2.265e-06	0.0438558
VAV3		LPAR6	0.0693865	0.219921	-0.489665	-0.597982	0.450091	0.416728	0.181989	0.521457
FAM210B		LRP8	0.608948	0.662283	0.474582	0.412468	-0.130823	-0.11968	-0.0331119	-0.00151718
TRIM22		LTB	1.82899	2.02933	1.78832	1.97864	0.00901085	0.109757	0.104721	0.170643
FOXC1		LTBP3	-0.671902	-0.683424	-0.610425	-0.406356	0.20151	-0.0752374	-0.0860811	-0.00370681
EFHD2		LYAR	0.526986	0.595569	0.493083	0.488978	-0.0888734	-0.151828	-0.224846	-0.0847943
ADA		LYNX1	1.60029	1.6695	1.94988	2.08243	0.288011	0.202567	0.602709	0.507334
SRPX2		LZTS2	-0.410124	-0.633905	-0.439636	-0.0608397	0.323747	0.12735	0.245713	0.17963
HBEGF		MAF	0.10891	0.0427678	0	0	1.55726	1.4894	1.33617	1.39975
TNFAIP2		MARCKS	-0.369032	-0.501583	-0.653527	-0.466244	0.130094	0.297152	0.00507641	0.204957
MTSS1		MCM10	0.800059	0.682205	0.740006	0.466287	-0.0347838	0.251663	0.0862656	-0.046139
SERPINB13		MDK	-1.05635	-0.973385	-0.725453	-0.46363	0.280628	0.078858	0.124142	0.061009
SOX9		MFAP5	1.87594	1.92914	1.97864	1.78832	0.410847	0.245874	0.368188	0.582947
PRXL2A		MMP9	-1.35324	-1.16084	-0.896287	-0.586893	-0.0353459	-0.365787	0.00773728	-0.0980706
ATP1B1		MN1	0.937827	0.747632	0.800059	0.916961	0.0696387	0.153564	0.124057	0.341117
PDGFC		MORN2	0.0034411	-0.366467	-1.06391	-0.798514	0.123744	0.127015	-0.0890115	0.264802
ADIRF		MROH6	0.686023	0.639892	0.648724	0.758213	0.0479848	-0.0066125	0.00395501	-0.1709
SH3KBP1		MRTO4	0.440462	0.398326	0.492298	0.525681	-0.166442	-0.17542	0.0230399	-0.20492
CBR3		MTHFR	-0.574698	-0.521115	-0.341218	-0.177518	0.237134	0.492252	0.135393	0.1284
ABHD3		MTSS1	-0.521115	-0.359337	-0.558946	-0.36283	0.121043	0.170388	0.271748	0.120315
CREG1		MVP	-0.537999	-0.522602	-0.366815	-0.319123	0.259777	0.0714794	0.158126	0.170565
CYSRT1		MYBL1	0.745533	1.04527	0.894117	0.275932	0.26622	0.0199654	-0.272539	0.209519
SDK2		MYO1E	-0.644496	-0.663484	-0.636019	-0.518712	-0.0311486	-0.000125063	0.0430192	-0.0648984
CHST11		NAB2	-0.280952	-0.31117	-0.295478	-0.688114	0.362851	0.224704	0.296244	0.324998
TGFBI		NET1	-0.952221	-0.946029	-1.14188	-0.820927	-0.0206887	0.0708174	-0.0587748	0.0926659
TRIOBP		NIBAN1	-0.885287	-1.00094	-0.620207	-0.446906	0.100559	0.229066	0.213652	0.298806
ITGB6		NINJ1	-0.367091	-0.31479	-0.182291	-0.703868	0.608915	0.346204	0.410847	0.490151
EREG		NMU	-0.729958	-0.78549	-0.696836	-0.408792	-0.0551738	0.185934	-0.160164	0.139823
MVP		NRG1	1.01132	0.991163	1.07611	1.18609	0.332452	0.311429	0.332649	0.390482
TFPI2		NRIP1	-2.06693	-2.06693	-2.11792	-2.06693	-0.12553	-0.0317255	-0.275961	-0.11001
PLEKHA4		NTM	1.46491	1.46491	1.46491	1.60029	0.379352	0.525539	0.407942	0.362851
OLFML2A		NUAK1	0.956849	0.665396	0.991163	0.991163	0.320923	0.157656	0.116843	0.271748
FHL2		ODC1	0.709289	0.812153	0.863032	0.926367	-0.00944102	-0.0253195	0.00221491	-0.15428
BHLHE40		OLFML2A	0.199546	0.135199	0.0265409	0.427274	1.11303	1.06617	1.09783	0.898165
CAMK2N1		OLR1	0.458544	0.387766	0.175241	0.029581	2.45365	2.45365	2.25672	1.92738
ICAM1		OPN3	-0.663484	-0.665306	-0.588572	-0.313737	0.168368	-0.00814035	0.134707	0.199506
SERPINE1		P2RY2	-1.61041	-1.48565	-1.61041	-1.23472	0.0914654	-0.109815	-0.0600594	0.0546849
KLF10		PAG1	1.04527	1.06725	0.607868	0.0296154	0	0.012979	1.1925e-07	0
CXXC5		PARP14	-0.119444	-0.042905	-0.0805833	-0.140571	0.539471	0.414176	0.494943	0.616493
SMIM14		PARP9	-0.151115	-0.0527558	-0.112692	-0.132839	0.4843	0.491655	0.310956	0.669256
PMEPA1		PDGFC	-0.620207	-0.483352	-0.515472	-0.338131	0.0956734	0.0761644	0.0755622	0.16313
REP15		PI3	1.76659	1.82899	1.6695	2.02933	0.32026	0.0242748	0.145979	0.392301
FHOD3		PID1	0.605778	0.750836	0.901112	1.21616	0	0	0.139036	0
PLXNA2		PLAT	-1.24852	-1.20829	-1.17081	-0.700941	-0.283653	-0.595882	-0.53782	-0.364392
PARP9		PLEKHA4	-0.379871	-0.586893	-0.589567	-0.696836	0.00996576	0.21152	0.191951	0.220459
KRT6B		PLXNA2	-0.78549	-0.862461	-0.85009	-0.638041	-0.128742	0.02068	-0.186812	0.166396
SLC7A5		PMEPA1	-0.946029	-1.05635	-0.946029	-0.646963	-0.0634564	-0.170705	-0.195155	-0.0417266
C9ORF16		POLD4	-1.04504	-1.06391	-0.798514	-0.546597	0.0107136	-0.207775	0.0175334	-0.00544214
C1ORF74		POPDC3	-0.650833	-0.628957	-1.18732	-2.11792	0.0643893	-0.0289906	0.100041	0.196063
MARCKS		PPAN	0.3655	0.389529	0.56952	0.489746	-0.360186	-0.312868	-0.189616	-0.0462313
CTSO		PROSER2	-0.919599	-0.981493	-0.793911	-0.530153	-0.143732	-0.202514	-0.232071	-0.109579
CTSD		PRXL2A	-0.488275	-0.545112	-0.480079	-0.276123	0.199389	0.154903	0.0990073	0.163109
DLK2		PTAFR	-0.878949	-0.830788	-0.871539	-0.582874	0.104277	0.118353	0.0412743	0.0204896
REL		PTGS1	2.44231	2.27672	2.18127	2.14632	0.439752	0.152264	0.00766671	0.636488
ANXA11		PTGS2	2.18127	2.44231	2.14632	1.87594	0.0334972	0.0286647	-0.0253195	-1.31135e-05
SMIM29		PTHLH	1.78832	1.78832	1.60029	1.52787	0.701278	0.552849	0.295834	0.384327
BMP1		PTPRZ1	0.989008	1.23322	1.04527	0.650809	0.188974	0.106024	0.283043	0.512413
KDM3A		PXDC1	-0.575735	-0.588572	-0.506391	-0.429492	0.0893015	0.12909	0.140447	0.0986575
C8ORF48		PYCR1	0.536037	0.522769	0.672955	0.745533	0	0.0559132	0.00370634	0
ETS2		R3HCC1	-0.677251	-0.40456	-0.574698	-1.20829	0.104111	-0.0166974	-0.0682395	0.0300331
NIBAN1		REL	-0.571459	-0.515472	-0.403764	-0.355372	-0.0198216	0.170136	0.0808088	0.27073
OPN3		REP15	-0.653527	-0.416693	-0.776474	-0.694255	0.0629787	-0.0477582	0.127317	0.0634235
EFNA1		RFFL	-0.589567	-0.516535	-0.866356	-1.40123	-0.10022	0.21553	-0.220365	-0.195155
HMGA1		RHCG	-1.40123	-1.17081	-1.24852	-0.919599	0.129632	-0.0300921	0.111132	0.176039
GSE1		RNASE4	-0.175706	-0.348307	-0.322947	-0.208958	0.46473	0.859879	0.0657138	0.136256
EMP1		RSAD2	4.6385e-06	0.00125958	0.0663397	0.136706	0.852519	0.575099	0.37783	1.16646
IGFL2		RSPH3	-0.620523	-0.636019	-0.244789	-0.679465	0.113242	0.0440624	0.130483	0.0963657
KCNN4		S100A3	-0.556317	-1.08809	-0.445877	-0.987283	-0.115728	-0.00283313	0.0107211	0.0242748
DRAM1		SAA1	-1.31774	-1.44813	-1.48565	-1.06391	-0.359673	-0.413436	-0.695345	-0.292936
FYB1		SAMD9	-0.820927	-1.02069	-0.931839	-0.673059	0.113684	0.0842292	0.0897653	0.262786
FGGY		SAMD9L	0.140141	0.117037	-0.116138	-0.298872	0.570091	0.631284	0.557667	0.564672
NINJ1		SBSN	1.49877	1.36768	1.71708	1.82899	0.0447769	0.0248959	0.203919	-0.00507593
C1RL		SCG5	-0.137648	-0.478344	-0.228318	-0.281834	0.560362	0.761602	0.625049	0.262887
SAA1		SDK2	0.0825965	-0.211907	-0.237373	-0.145865	0.796655	0.710221	0.549404	0.700085
NAB2		SEMA3B	-0.148132	-0.261644	0.0320855	-0.0105496	0.84178	0.950788	0.824529	0.773626
MDK		SERPINB13	-0.412435	-0.410124	-0.386801	-0.248541	0.304052	0.217312	0.162387	0.404272
SCG5		SERPINE1	-1.47386	-1.47386	-1.44813	-0.981493	0.0196738	-0.141745	-0.249499	0.161981
CMTM7		SERPINE2	1.32077	1.21616	1.23322	1.23322	0.195962	0.370371	0.202094	0.240994
LTBP3		SH2D5	1.07611	0.964827	1.16987	1.16987	0.0121685	0.0299749	0.138371	0.106254
KLF7		SH3KBP1	-1.18732	-1.18732	-1.16084	-0.78549	-0.12455	-0.158291	-0.164093	-0.0924245
RSPH3		SIK1	-0.518712	-0.450203	-0.580937	-0.322415	0.26557	0.257011	0.193596	0.365374
AQP3		SKP2	0.518197	0.901112	0.700888	0.528619	0.0575888	-0.000211038	0.00770354	0.0458974
TENT5A		SLC22A18	-0.446906	-0.146603	-0.240864	-0.474572	0.382347	0.15268	0.40175	0.136042
ARHGAP8		SLC2A12	9.25842e-05	0	0	0	0.810794	0.669256	0.742564	0.824529
POLD4		SLC38A6	-0.30495	-0.347512	-0.608168	-0.737052	0.157241	0.181886	0.0135194	0.194144
PROSER2		SLC43A3	0.882289	0.863032	0.916961	0.0713137	0.0329167	0.0211561	0.0154434	0.0364872
C3		SLC7A5	-0.669857	-0.707088	-0.707088	-0.433559	-0.01381	0.0152756	-0.0702156	0.16607
HCAR2		SLFN5	-0.352608	-0.476544	-0.614933	-0.412435	0.0846796	0.503123	0.0667711	0.151626
BIK		SLPI	0.759637	0.643396	0.89144	1.01132	0.0436386	-0.0896946	0.0609407	0.331993
SAMD9L		SMIM14	-0.275169	-0.151695	-0.394447	-0.0862452	0.398016	0.407551	0.430087	0.294316
NMU		SMIM29	-0.748168	-0.952221	-0.667795	-0.574698	-0.172645	-0.0484203	-0.0965595	-0.147486
CORO6		SOX9	-0.871539	-0.892205	-0.78549	-0.525259	0.0739157	0.080562	0.0105295	0.0800023
EHBP1L1		SPOCD1	-2.11792	-2.53421	-2.25205	-1.97781	0.450851	0.335559	0.156805	0.296244
FAM83F		SPRR1A	3.27703	3.03097	3.03097	3.27703	0.666516	0.845954	0.710221	0.950788
DTX4		SPRR1B	1.92914	1.86163	1.82899	1.86163	0.291714	0.428228	0.367667	0.547115
SLFN5		SPRR2A	2.27672	1.87594	2.27672	2.27672	0.0466045	0.219857	0.11475	0.051757
SLC38A6		SPRR2B	0.725935	0.648724	0.989008	0.762647	0	0.129693	0.0567405	0
TMC4		SPRR2D	2.14632	1.60029	2.08243	1.76659	0.0950927	0.616493	0.124583	0.0992311
SLC22A18		SPRR2E	2.67848	2.18127	2.67848	2.67848	-0.00437617	0.0130559	1.1925e-07	-7.29525e-05
GPX4		SRM	0.39488	0.487739	0.612148	0.499275	-0.0093621	-0.0776747	-0.152491	-0.176537
MTHFR		SRPX2	-2.53421	-2.21556	-2.53421	-3.17135	-0.395113	-0.487082	-0.503991	-0.100294
YPEL3		ST6GALNAC2	-0.569052	-0.531808	-0.546597	-0.322147	0.534519	0.629544	0.485014	0.375519
HSD17B8		STAMBPL1	0.542794	0.556891	0.256176	0.138058	-0.269537	-1.00148	-0.0860443	-0.183567
FAM89B		STC2	0.926367	0.700888	1.03651	0.0289417	-0.00334281	-8.35e-07	5.95e-07	-0.000134063
GABARAPL1		TAGLN	2.08243	2.14632	2.02933	2.44231	0.962779	0.674359	0.768398	0.920315
LZTS2		TEAD4	0.242215	0.0541216	0.386293	0.36265	-0.0712144	-0.244118	-0.344688	-0.695345
MMP9		TECPR1	-0.333669	-0.280269	-0.964765	-0.623558	0.141074	0.117876	-0.267351	0.291299
S100A3		TENT5A	0.00423936	0	0	0.0214739	0.9914	1.11303	0.469309	0.981918
GATA6		TFPI2	-1.20829	-0.931839	-1.27022	-1.03162	-0.172458	-0.105485	-0.395113	-0.181597
PLAT		TGFBI	-0.737052	-0.855009	-0.659478	-0.462672	0.222026	0.0933495	0.0630759	0.175609
GPR137B		THBS1	1.54962	1.49877	1.36768	1.49877	0.396785	0.323747	0.025599	0.339037
CXCL14		TMC4	-0.769076	-0.725453	-0.779287	-1.41849	0.248411	-0.0434954	0.379737	0.0523603
ATP8B1		TMCC3	-1.2613	-1.49909	-1.57749	-1.36898	-0.0655128	-0.000205788	-0.0833005	0.0162416
VPS9D1		TMEM79	-1.00094	-0.885287	-0.973385	-0.964765	0.314144	0.584132	0.50009	0.372088
ACP6		TMSB15B	-0.638041	-0.150249	-1.01251	-1.54596	-0.37684	-0.018797	0.00331867	-0.0092895
R3HCC1		TNF	0.512629	0.621993	0.71748	0.759637	-0.0276238	0.158041	0.134887	-0.246849
ISG20		TNFAIP2	0	0	0.0603006	0	0.588938	0.810794	0.674359	0.912844
RSAD2		TNFSF10	-0.1523	-0.165009	-0.0548737	0.0859491	0.824529	0.84178	0.796655	0.845954
POPDC3		TPM1	0.0839814	0.00794625	0.00949156	0.0531107	1.06617	1.33617	1.16646	1.06617
RNASE4		TREM2	1.28761	1.18609	1.32077	1.06725	0.283983	0.0151298	0.225793	0.293914
RFFL		TRIM22	0.0580167	0.193141	0.0556788	0.0833005	0.750084	0.692549	0.579944	0.796655
CST6		TRIOBP	-1.02069	-0.987283	-0.836527	-0.633905	0.074647	-0.105066	0.00363398	0.0270523
C11ORF80		UBA7	1.44325e-05	0.149658	-0.0129018	-8.875e-05	0.742564	0.779532	0.898165	0.654743
TECPR1		VAV3	0.129816	0.00119227	0	0.0141564	0.981918	0.981918	0.692549	0.810794
CYP27C1		VIM	0.42411	0.498036	0.513682	0.43457	-0.190443	-0.134729	-0.337045	-0.242217
LPAR6		VPS9D1	-0.501583	-0.391482	-1.08809	-0.952221	-0.0358144	-0.125375	0.107893	0.121308
MORN2		WNT10A	-0.208384	-0.582874	-0.579377	-0.0758247	1.39975	1.55726	1.70083	1.33617
TMSB15B		YPEL3	-0.364525	-0.258651	-0.3239	-0.0605284	0.522841	0.11924	0.269917	0.472025
