# Supplementary material for: Ferulic acid in synergy with retinol alleviates oxidative injury of HaCaT cells during UVB-induced photoaging
Source: Aging (Albany NY). 2024 Apr 18;16(8):7153–73. doi: 10.18632/aging.205749 (PMC11087097; doi:10.18632/aging.205749)
Supplement: Supplementary Table 6 [file aging-16-205749-s006.xlsx]

## Sheet: C vs M
gene_id	Control_1	Control_2	Control_3	Control_4	Model_1	Model_2	Model_3	Model_4	group1	group2	log2FoldChange	pvalue	padj	gene_name	gene_chr	gene_start	gene_end	gene_strand	gene_length	gene_biotype	gene_description	tf_family
ENSG00000136244	13.7045	23.8358	13.6479	17.6676	988.351	1438.66	1211.92	1237.66	17.2139	1219.15	-6.1482	1.02812e-177	2.29291e-173	IL6	7	22725884	22732002	+	2069	protein_coding	interleukin 6 [Source:HGNC Symbol;Acc:HGNC:6018]	-
ENSG00000163739	137.902	97.0456	77.873	138.816	2643.73	3329.54	2632.12	3117.06	112.909	2930.61	-4.69925	1.19792e-170	1.3358e-166	CXCL1	4	73869393	73871242	+	1296	protein_coding	C-X-C motif chemokine ligand 1 [Source:HGNC Symbol;Acc:HGNC:4602]	-
ENSG00000163216	97.6446	57.8868	72.2533	62.2571	1590.69	2295.5	1877.96	2340.08	72.5105	2026.06	-4.80451	2.3224e-161	1.72647e-157	SPRR2D	1	153039725	153041931	-	1057	protein_coding	small proline rich protein 2D [Source:HGNC Symbol;Acc:HGNC:11264]	-
ENSG00000108352	7998.29	8365.5	7193.22	8032.85	1289.52	1073.7	1089.47	1087.53	7897.46	1135.06	2.798	1.84451e-156	1.02841e-152	RAPGEFL1	17	40177010	40195656	+	5711	protein_coding	Rap guanine nucleotide exchange factor like 1 [Source:HGNC Symbol;Acc:HGNC:17428]	-
ENSG00000265972	17600	17180.5	13545.1	14888.7	1318.15	936.184	814.814	1019.92	15803.6	1022.27	3.94976	2.53369e-156	1.13013e-152	TXNIP	1	145992435	145996600	-	3625	protein_coding	thioredoxin interacting protein [Source:HGNC Symbol;Acc:HGNC:16952]	-
ENSG00000260231	26.5525	18.7281	33.7182	19.3502	887.607	1462.46	1089.47	980.956	24.5872	1105.12	-5.48563	1.05647e-139	3.9269e-136	KDM7A-DT	7	140177184	140179640	+	2457	bidirectional_promoter_lncRNA	KDM7A divergent transcript [Source:HGNC Symbol;Acc:HGNC:48959]	-
ENSG00000115758	267.238	205.158	252.887	211.169	2842.04	4300.1	2831.25	3442.51	234.113	3353.98	-3.84015	5.11635e-134	1.63007e-130	ODC1	2	10439968	10448504	-	2968	protein_coding	ornithine decarboxylase 1 [Source:HGNC Symbol;Acc:HGNC:8109]	-
ENSG00000175592	519.915	572.058	618.167	658.747	4597.1	6857.42	6505.92	5559.13	592.222	5879.89	-3.3113	2.6491e-124	7.38504e-121	FOSL1	11	65892049	65900573	-	1887	protein_coding	FOS like 1, AP-1 transcription factor subunit [Source:HGNC Symbol;Acc:HGNC:13718]	TF_bZIP
ENSG00000175573	605.568	508.212	634.224	636.873	5020.23	7949.63	6559.71	5873.13	596.219	6350.67	-3.41271	1.54588e-122	3.83068e-119	C11orf68	11	65916808	65919117	-	1761	protein_coding	chromosome 11 open reading frame 68 [Source:HGNC Symbol;Acc:HGNC:28801]	-
ENSG00000266094	2593.58	2903.71	2060.83	2661.07	270.418	251.236	311.277	245.239	2554.79	269.542	3.24374	3.33457e-122	7.43675e-119	RASSF5	1	206507530	206589448	+	6976	protein_coding	Ras association domain family member 5 [Source:HGNC Symbol;Acc:HGNC:17609]	-
ENSG00000117318	7266.81	6473.11	5407.76	8271.78	588.556	514.372	589.367	741.447	6854.87	608.436	3.49329	4.49036e-120	9.10401e-117	ID3	1	23557918	23559794	-	1797	protein_coding	inhibitor of DNA binding 3, HLH protein [Source:HGNC Symbol;Acc:HGNC:5362]	bHLH
ENSG00000274213	41.1135	45.1177	25.6901	53.844	838.826	1011.56	725.55	919.073	41.4413	873.751	-4.40066	1.06798e-118	1.98483e-115	AC015912.3	17	56914186	56914533	+	348	lincRNA	novel transcript	-
ENSG00000203783	8.56531	8.51277	13.6479	12.6197	533.412	657.18	493.237	583.302	10.8364	566.783	-5.70256	9.87349e-117	1.69383e-113	PRR9	1	153217584	153219317	+	1229	protein_coding	proline rich 9 [Source:HGNC Symbol;Acc:HGNC:32057]	-
ENSG00000163734	35.1178	25.5383	16.8591	44.5895	878.063	1348.74	901.788	1063.47	30.5262	1048.01	-5.10437	1.34635e-116	2.14473e-113	CXCL3	4	74036589	74038807	-	2219	protein_coding	C-X-C motif chemokine ligand 3 [Source:HGNC Symbol;Acc:HGNC:4604]	-
ENSG00000115009	11.9914	18.7281	11.2394	27.7633	655.366	799.988	545.879	662.375	17.4306	665.902	-5.25771	2.56967e-113	3.82059e-110	CCL20	2	227805739	227817564	+	1594	protein_coding	C-C motif chemokine ligand 20 [Source:HGNC Symbol;Acc:HGNC:10619]	-
ENSG00000185479	221.842	281.773	331.563	286.887	2108.2	2413.19	2159.49	2021.5	280.516	2175.59	-2.9543	4.1411e-110	5.77217e-107	KRT6B	12	52446651	52452126	-	2282	protein_coding	keratin 6B [Source:HGNC Symbol;Acc:HGNC:6444]	-
ENSG00000168209	20312.6	18159.4	11569.4	22187.9	1426.32	1351.38	1612.46	1369.44	18057.3	1439.9	3.64844	5.87626e-105	7.70896e-102	DDIT4	10	72273920	72276036	+	2058	protein_coding	DNA damage inducible transcript 4 [Source:HGNC Symbol;Acc:HGNC:24944]	-
ENSG00000118523	29.1221	13.6204	13.6479	26.0807	462.362	737.84	683.208	567.259	20.6178	612.667	-4.89604	9.51922e-95	1.17943e-91	CTGF	6	131948176	131951373	-	2339	protein_coding	connective tissue growth factor [Source:HGNC Symbol;Acc:HGNC:2500]	-
ENSG00000104081	883.084	1073.46	796.392	997.796	58.3254	18.5121	58.3645	40.1092	937.683	43.8278	4.40108	1.09914e-93	1.29016e-90	BMF	15	40087890	40108892	-	5447	protein_coding	Bcl2 modifying factor [Source:HGNC Symbol;Acc:HGNC:24132]	-
ENSG00000174276	51.3919	48.5228	61.0139	65.6223	495.236	636.023	660.319	647.477	56.6377	609.764	-3.42663	6.23936e-93	6.95751e-90	ZNHIT2	11	65116403	65117708	-	1306	protein_coding	zinc finger HIT-type containing 2 [Source:HGNC Symbol;Acc:HGNC:1177]	-
ENSG00000019186	2504.5	2405.71	2627.61	2284.16	357.376	224.79	377.652	331.187	2455.5	322.751	2.92439	5.39234e-90	5.72667e-87	CYP24A1	20	54153449	54173973	-	3972	protein_coding	cytochrome P450 family 24 subfamily A member 1 [Source:HGNC Symbol;Acc:HGNC:2602]	-
ENSG00000149968	70.2356	85.979	81.8871	74.0355	577.952	712.717	571.056	615.39	78.0343	619.279	-2.98688	9.35575e-89	9.48418e-86	MMP3	11	102835801	102843803	-	2048	protein_coding	matrix metallopeptidase 3 [Source:HGNC Symbol;Acc:HGNC:7173]	-
ENSG00000006327	835.118	704.857	733.773	837.105	3905.68	5906.69	5058.25	4865.82	777.713	4934.11	-2.66532	2.62506e-87	2.5454e-84	TNFRSF12A	16	3018445	3022383	+	1848	protein_coding	TNF receptor superfamily member 12A [Source:HGNC Symbol;Acc:HGNC:18152]	-
ENSG00000188486	1317.35	1141.56	1471.56	1341.89	7479.44	11514.5	8552.11	8601.7	1318.09	9036.95	-2.77717	5.0283e-87	4.67255e-84	H2AFX	11	119093854	119095467	-	1614	protein_coding	H2A histone family member X [Source:HGNC Symbol;Acc:HGNC:4739]	-
ENSG00000268996	36.8309	37.4562	32.9154	24.398	419.943	482.637	366.208	415.99	32.9001	421.195	-3.67811	1.34691e-84	1.20155e-81	MAN1B1-DT	9	137084946	137086817	-	1872	antisense	MAN1B1 divergent transcript [Source:HGNC Symbol;Acc:HGNC:48715]	-
ENSG00000172936	647.538	692.088	688.815	715.115	2965.05	4286.88	3837.18	3621.29	685.889	3677.6	-2.42238	5.48656e-84	4.7062e-81	MYD88	3	38138478	38143022	+	3989	protein_coding	MYD88, innate immune signal transduction adaptor [Source:HGNC Symbol;Acc:HGNC:7562]	-
ENSG00000186834	609.85	814.672	709.688	814.39	3676.62	4059.44	4260.61	3528.46	737.15	3881.28	-2.39642	7.68071e-84	6.34427e-81	HEXIM1	17	45148502	45152101	+	3600	protein_coding	hexamethylene bisacetamide inducible 1 [Source:HGNC Symbol;Acc:HGNC:24953]	-
ENSG00000163435	9753.32	10419.6	6569.43	11743	896.091	979.82	1254.26	927.095	9621.36	1014.32	3.24576	1.9163e-83	1.52633e-80	ELF3	1	202007945	202017188	+	7191	protein_coding	E74 like ETS transcription factor 3 [Source:HGNC Symbol;Acc:HGNC:3318]	ETS
ENSG00000062582	26.5525	22.9845	24.8873	29.4459	357.376	573.876	536.724	405.676	25.9675	468.413	-4.17168	1.50003e-82	1.15357e-79	MRPS24	7	43866558	43869893	-	2613	protein_coding	mitochondrial ribosomal protein S24 [Source:HGNC Symbol;Acc:HGNC:14510]	-
ENSG00000129194	2150.75	2020.08	1934.78	2335.48	10095.6	14588.9	11139.6	11070.1	2110.27	11723.6	-2.47383	3.90767e-82	2.90497e-79	SOX15	17	7588178	7590170	-	1541	protein_coding	SRY-box 15 [Source:HGNC Symbol;Acc:HGNC:11196]	HMG
ENSG00000101493	1416.7	1501.65	1218.67	1352.83	300.111	280.326	294.111	293.37	1372.46	291.98	2.23192	1.79485e-81	1.29125e-78	ZNF516	18	76358190	76495190	-	8217	protein_coding	zinc finger protein 516 [Source:HGNC Symbol;Acc:HGNC:28990]	zf-C2H2
ENSG00000133056	1110.92	1256.48	973.814	1112.21	214.213	171.898	192.259	170.751	1113.36	187.28	2.56899	3.38885e-80	2.36182e-77	PIK3C2B	1	204422628	204494724	-	9414	protein_coding	phosphatidylinositol-4-phosphate 3-kinase catalytic subunit type 2 beta [Source:HGNC Symbol;Acc:HGNC:8972]	-
ENSG00000108175	2214.99	2930.95	2490.33	2685.47	391.311	232.724	382.23	311.706	2580.43	329.493	2.96639	3.51032e-79	2.37234e-76	ZMIZ1	10	79069035	79316528	+	11048	protein_coding	zinc finger MIZ-type containing 1 [Source:HGNC Symbol;Acc:HGNC:16493]	zf-MIZ
ENSG00000081913	704.925	804.457	713.702	779.055	132.558	116.362	132.751	143.247	750.535	131.229	2.51318	2.05742e-78	1.34955e-75	PHLPP1	18	62715450	62980433	+	9142	protein_coding	PH domain and leucine rich repeat protein phosphatase 1 [Source:HGNC Symbol;Acc:HGNC:20610]	-
ENSG00000159023	806.853	858.938	693.632	685.669	123.014	115.04	112.151	96.2621	761.273	111.617	2.7692	9.73103e-78	6.20061e-75	EPB41	1	28887091	29120046	+	19993	protein_coding	erythrocyte membrane protein band 4.1 [Source:HGNC Symbol;Acc:HGNC:3377]	-
ENSG00000260577	9.42185	14.4717	8.83096	10.9371	261.934	416.523	406.262	351.815	10.9154	359.134	-5.04124	1.02273e-77	6.33579e-75	AC126773.2	16	68644248	68646168	-	1682	antisense	novel transcript, antisense to CDH3	-
ENSG00000197982	325.482	242.614	301.858	257.441	1471.92	1926.58	1548.37	1590.62	281.849	1634.37	-2.5351	2.93979e-77	1.77198e-74	C1orf122	1	37806979	37809454	+	2231	protein_coding	chromosome 1 open reading frame 122 [Source:HGNC Symbol;Acc:HGNC:24789]	-
ENSG00000197451	971.307	860.641	1005.12	916.189	3357.42	3239.62	3095.61	3364.59	938.315	3264.31	-1.79856	6.17372e-76	3.62332e-73	HNRNPAB	5	178204507	178211163	+	2144	protein_coding	heterogeneous nuclear ribonucleoprotein A/B [Source:HGNC Symbol;Acc:HGNC:5034]	-
ENSG00000101361	844.54	961.092	1279.69	986.018	5371.24	5609.17	6978.56	6354.44	1017.83	6078.35	-2.57795	3.92646e-75	2.24533e-72	NOP56	20	2652145	2658393	+	5398	protein_coding	NOP56 ribonucleoprotein [Source:HGNC Symbol;Acc:HGNC:15911]	-
ENSG00000008083	445.396	574.612	545.914	511.518	69.9905	55.5364	59.5089	61.8828	519.36	61.7296	3.06813	6.85013e-75	3.81929e-72	JARID2	6	15246296	15522040	+	6015	protein_coding	jumonji and AT-rich interaction domain containing 2 [Source:HGNC Symbol;Acc:HGNC:6196]	ARID
ENSG00000241794	338.33	343.065	268.14	353.351	1775.21	2152.69	1551.81	1906.91	325.721	1846.66	-2.50329	1.03883e-74	5.65073e-72	SPRR2A	1	153056113	153057537	-	709	protein_coding	small proline rich protein 2A [Source:HGNC Symbol;Acc:HGNC:11261]	-
ENSG00000170955	597.002	456.284	560.365	576.299	2659.64	3546.39	2682.48	2781.29	547.488	2917.45	-2.41342	1.35291e-73	7.18396e-71	CAVIN3	11	6318946	6320647	-	1672	protein_coding	caveolae associated protein 3 [Source:HGNC Symbol;Acc:HGNC:9400]	-
ENSG00000124151	3613.71	4854.83	3042.67	3864.99	697.784	543.463	621.41	613.098	3844.05	618.939	2.63384	3.08492e-72	1.6e-69	NCOA3	20	47501902	47656877	+	8402	protein_coding	nuclear receptor coactivator 3 [Source:HGNC Symbol;Acc:HGNC:7670]	-
ENSG00000162231	895.932	832.549	764.28	859.821	3585.42	4416.46	5291.71	3884.86	838.145	4294.61	-2.35727	1.4248e-70	7.22178e-68	NXF1	11	62792123	62806302	-	6194	protein_coding	nuclear RNA export factor 1 [Source:HGNC Symbol;Acc:HGNC:8071]	-
ENSG00000131242	1104.93	1412.27	1235.53	1182.88	208.911	145.452	218.581	225.757	1233.9	199.675	2.62367	1.01443e-69	5.0275e-67	RAB11FIP4	17	31391624	31538217	+	15383	protein_coding	RAB11 family interacting protein 4 [Source:HGNC Symbol;Acc:HGNC:30267]	-
ENSG00000169136	64.2399	57.0356	50.5773	58.0505	507.961	370.242	537.869	534.025	57.4758	487.524	-3.08699	6.71751e-69	3.25683e-66	ATF5	19	49928702	49933935	+	2954	protein_coding	activating transcription factor 5 [Source:HGNC Symbol;Acc:HGNC:790]	TF_bZIP
ENSG00000185507	256.103	200.05	223.183	300.348	1646.9	3174.83	2267.06	2137.25	244.921	2306.51	-3.23497	1.6511e-68	7.83464e-66	IRF7	11	612553	615999	-	2628	protein_coding	interferon regulatory factor 7 [Source:HGNC Symbol;Acc:HGNC:6122]	IRF
ENSG00000108179	1254.82	1034.3	1108.69	1071.83	3900.38	4957.28	5163.54	4848.63	1117.41	4717.46	-2.07775	8.86824e-68	4.12041e-65	PPIF	10	79347469	79355337	+	2674	protein_coding	peptidylprolyl isomerase F [Source:HGNC Symbol;Acc:HGNC:9259]	-
ENSG00000114796	1331.91	1612.32	854.195	1223.27	132.558	149.419	93.8409	111.16	1255.42	121.744	3.36839	5.27748e-67	2.40201e-64	KLHL24	3	183635568	183684477	+	8650	protein_coding	kelch like family member 24 [Source:HGNC Symbol;Acc:HGNC:25947]	-
ENSG00000175602	1257.39	913.42	1201.01	1152.6	6653.34	10867.9	7189.13	6906.8	1131.1	7904.3	-2.80473	6.30073e-67	2.81038e-64	CCDC85B	11	65890112	65891635	+	1524	protein_coding	coiled-coil domain containing 85B [Source:HGNC Symbol;Acc:HGNC:24926]	-
ENSG00000135960	404.283	612.919	483.295	559.473	42.4185	58.1809	56.0757	41.2552	514.992	49.4826	3.38595	9.31771e-67	4.07458e-64	EDAR	2	108894471	108989372	-	4426	protein_coding	ectodysplasin A receptor [Source:HGNC Symbol;Acc:HGNC:2895]	-
ENSG00000173706	1027.84	1382.47	1196.19	1140.82	264.055	248.591	252.913	234.925	1186.83	250.121	2.24596	1.15072e-66	4.93528e-64	HEG1	3	124965710	125055958	-	9925	protein_coding	heart development protein with EGF like domains 1 [Source:HGNC Symbol;Acc:HGNC:29227]	-
ENSG00000181873	171.306	178.768	162.971	176.676	698.845	839.657	905.221	812.498	172.43	814.055	-2.23886	1.49267e-66	6.28105e-64	IBA57	1	228165815	228182257	+	10219	protein_coding	IBA57, iron-sulfur cluster assembly [Source:HGNC Symbol;Acc:HGNC:27302]	-
ENSG00000197183	475.375	503.956	349.224	444.213	38.1766	30.4128	51.4981	35.5253	443.192	38.9032	3.50368	5.25941e-66	2.17214e-63	NOL4L	20	32443059	32585074	-	9448	protein_coding	nucleolar protein 4 like [Source:HGNC Symbol;Acc:HGNC:16106]	-
ENSG00000138061	4829.98	8276.97	7931.81	5453.38	1018.04	903.127	733.561	857.191	6623.04	877.981	2.91513	2.76768e-64	1.12227e-61	CYP1B1	2	38066973	38109902	-	6014	protein_coding	cytochrome P450 family 1 subfamily B member 1 [Source:HGNC Symbol;Acc:HGNC:2597]	-
ENSG00000095370	453.105	469.054	608.534	530.027	34.9953	62.1478	64.0865	40.1092	515.18	50.3347	3.36551	2.87387e-64	1.14452e-61	SH2D3C	9	127738317	127778741	-	4659	protein_coding	SH2 domain containing 3C [Source:HGNC Symbol;Acc:HGNC:16884]	-
ENSG00000005238	628.694	561.843	484.9	668.843	96.5021	89.916	78.9637	84.8023	586.07	87.546	2.74214	4.84875e-64	1.89714e-61	FAM214B	9	35104112	35116341	-	6409	protein_coding	family with sequence similarity 214 member B [Source:HGNC Symbol;Acc:HGNC:25666]	-
ENSG00000237499	38.5439	57.8868	26.4929	36.1764	371.162	464.125	393.674	432.033	39.775	415.249	-3.38641	9.32078e-64	3.584e-61	AL357060.1	6	137823673	137868233	-	4088	antisense	uncharacterized LOC100130476 [Source:NCBI gene;Acc:100130476]	-
ENSG00000156804	585.011	722.734	692.026	812.707	88.0184	83.3045	85.8301	127.203	703.12	96.0891	2.86969	1.0668e-63	4.03249e-61	FBXO32	8	123497889	123541206	-	7395	protein_coding	F-box protein 32 [Source:HGNC Symbol;Acc:HGNC:16731]	-
ENSG00000274602	1224.84	1275.21	1209.84	1251.03	354.194	380.821	382.23	362.129	1240.23	369.843	1.74633	1.16947e-63	4.34692e-61	PI4KAP1	22	18533646	18577968	-	4812	transcribed_unprocessed_pseudogene	phosphatidylinositol 4-kinase alpha pseudogene 1 [Source:HGNC Symbol;Acc:HGNC:33576]	-
ENSG00000182580	4783.73	4500.7	3188.78	4716.4	665.97	614.867	886.911	721.965	4297.4	722.428	2.57207	4.83286e-63	1.76692e-60	EPHB3	3	184561784	184582409	+	4532	protein_coding	EPH receptor B3 [Source:HGNC Symbol;Acc:HGNC:3394]	-
ENSG00000140465	2698.93	1740.86	1762.18	1261.13	120.893	175.865	160.216	206.276	1865.77	165.812	3.49375	1.18145e-62	4.24978e-60	CYP1A1	15	74719542	74725610	-	3435	protein_coding	cytochrome P450 family 1 subfamily A member 1 [Source:HGNC Symbol;Acc:HGNC:2595]	-
ENSG00000183779	238.972	292.839	318.718	346.621	1502.67	2136.83	1739.49	1524.15	299.287	1725.79	-2.52682	2.47219e-62	8.75157e-60	ZNF703	8	37695751	37700021	+	3349	protein_coding	zinc finger protein 703 [Source:HGNC Symbol;Acc:HGNC:25883]	-
ENSG00000197019	345.182	326.039	227.197	402.147	2068.96	3933.83	3049.83	2832.85	325.141	2971.37	-3.19208	2.68117e-62	9.34304e-60	SERTAD1	19	40421592	40426025	-	2114	protein_coding	SERTA domain containing 1 [Source:HGNC Symbol;Acc:HGNC:17932]	-
ENSG00000186480	14725.5	11812.3	5718.45	10774.7	889.728	1157.01	977.319	921.365	10757.7	986.355	3.44744	3.91522e-62	1.34334e-59	INSIG1	7	155297776	155310235	+	3650	protein_coding	insulin induced gene 1 [Source:HGNC Symbol;Acc:HGNC:6083]	-
ENSG00000189433	66.8095	74.0611	83.4928	84.9725	415.701	596.355	584.789	527.149	77.334	530.999	-2.77749	5.57706e-62	1.88454e-59	GJB4	1	34759741	34763724	+	2840	protein_coding	gap junction protein beta 4 [Source:HGNC Symbol;Acc:HGNC:4286]	-
ENSG00000188483	263.812	253.681	244.859	275.109	1368	2360.3	1641.07	1471.43	259.365	1710.2	-2.7205	1.36633e-61	4.54805e-59	IER5L	9	129175552	129178262	-	2711	protein_coding	immediate early response 5 like [Source:HGNC Symbol;Acc:HGNC:23679]	-
ENSG00000233834	43.6831	33.1998	26.4929	27.7633	352.073	476.026	297.544	365.567	32.7848	372.803	-3.50826	8.24002e-61	2.70248e-58	AC005083.1	7	20217577	20221700	+	901	processed_transcript	uncharacterized LOC100506098 [Source:NCBI gene;Acc:100506098]	-
ENSG00000180357	2538.76	2856.89	1973.32	2451.58	444.334	275.037	454.327	388.486	2455.14	390.546	2.64996	2.93079e-60	9.47281e-58	ZNF609	15	64460742	64686068	+	12112	protein_coding	zinc finger protein 609 [Source:HGNC Symbol;Acc:HGNC:29003]	-
ENSG00000176022	125.054	114.071	181.436	137.975	796.407	766.931	989.907	831.979	139.634	846.306	-2.5983	6.46648e-60	2.06022e-57	B3GALT6	1	1232226	1235041	+	2816	protein_coding	beta-1,3-galactosyltransferase 6 [Source:HGNC Symbol;Acc:HGNC:17978]	-
ENSG00000175984	1173.45	1439.51	1044.46	1319.18	293.748	227.435	230.025	232.633	1244.15	245.96	2.33655	1.38059e-59	4.33662e-57	DENND2C	1	114582848	114670422	-	7413	protein_coding	DENN domain containing 2C [Source:HGNC Symbol;Acc:HGNC:24748]	-
ENSG00000203785	111.349	110.666	242.45	102.64	1458.14	2013.85	1635.35	1843.88	141.776	1737.8	-3.61371	1.75211e-59	5.42717e-57	SPRR2E	1	153093135	153106184	-	734	protein_coding	small proline rich protein 2E [Source:HGNC Symbol;Acc:HGNC:11265]	-
ENSG00000099992	979.015	858.938	677.576	933.015	125.135	96.5275	132.751	158.145	862.136	128.139	2.74645	2.23434e-59	6.82605e-57	TBC1D10A	22	30291990	30327046	-	7047	protein_coding	TBC1 domain family member 10A [Source:HGNC Symbol;Acc:HGNC:23609]	-
ENSG00000146592	6.85225	0.851277	3.21126	10.0957	222.697	378.176	259.779	305.976	5.25263	291.657	-5.79714	7.82287e-59	2.35764e-56	CREB5	7	28299321	28825894	+	11674	protein_coding	cAMP responsive element binding protein 5 [Source:HGNC Symbol;Acc:HGNC:16844]	TF_bZIP
ENSG00000124216	53.9615	28.9434	28.0985	22.7154	370.101	710.072	584.789	481.31	33.4297	536.568	-4.00555	1.58672e-58	4.71828e-56	SNAI1	20	49982999	49988886	+	1686	protein_coding	snail family transcriptional repressor 1 [Source:HGNC Symbol;Acc:HGNC:11128]	zf-C2H2
ENSG00000224877	177.302	132.799	156.549	157.325	704.147	818.5	652.309	740.301	155.994	728.814	-2.22337	2.01332e-58	5.90803e-56	NDUFAF8	17	81239239	81241281	+	1376	protein_coding	NADH:ubiquinone oxidoreductase complex assembly factor 8 [Source:HGNC Symbol;Acc:HGNC:33551]	-
ENSG00000153902	53.1049	40.8613	49.7745	53.844	354.194	523.628	375.364	366.713	49.3962	404.975	-3.03316	2.77889e-58	8.04869e-56	LGI4	19	35124513	35142451	-	4532	protein_coding	leucine rich repeat LGI family member 4 [Source:HGNC Symbol;Acc:HGNC:18712]	-
ENSG00000128564	33.4047	27.2409	33.7182	20.1915	258.753	428.423	422.284	326.603	28.6388	359.016	-3.64543	6.35751e-58	1.81776e-55	VGF	7	101162509	101165593	-	2704	protein_coding	VGF nerve growth factor inducible [Source:HGNC Symbol;Acc:HGNC:12684]	-
ENSG00000198742	2064.24	2130.75	1716.42	1921.56	525.989	368.92	477.215	450.369	1958.24	455.623	2.10148	9.02659e-58	2.54824e-55	SMURF1	7	99027438	99144100	-	6276	protein_coding	SMAD specific E3 ubiquitin protein ligase 1 [Source:HGNC Symbol;Acc:HGNC:16807]	-
ENSG00000175662	5392.72	5066.8	4822.51	5160.61	1633.11	1606.59	1890.55	1576.86	5110.66	1676.78	1.60768	1.14221e-57	3.18419e-55	TOM1L2	17	17843511	17972422	-	7863	protein_coding	target of myb1 like 2 membrane trafficking protein [Source:HGNC Symbol;Acc:HGNC:11984]	-
ENSG00000210082	199139	217955	154136	205724	858716	1.11179e+06	775842	886043	194238	908097	-2.22502	1.77197e-57	4.87882e-55	MT-RNR2	MT	1671	3229	+	1559	Mt_rRNA	mitochondrially encoded 16S RNA [Source:HGNC Symbol;Acc:HGNC:7471]	-
ENSG00000124813	797.431	799.349	551.534	766.435	123.014	81.9822	119.018	106.576	728.687	107.647	2.75343	2.83295e-57	7.70493e-55	RUNX2	6	45328157	45664349	+	8192	protein_coding	runt related transcription factor 2 [Source:HGNC Symbol;Acc:HGNC:10472]	Runt
ENSG00000127824	1993.15	2070.31	2887.73	2655.18	10001.2	12503.6	14323.3	14205.5	2401.59	12758.4	-2.40929	3.36172e-57	9.0329e-55	TUBA4A	2	219249711	219278170	-	4079	protein_coding	tubulin alpha 4a [Source:HGNC Symbol;Acc:HGNC:12407]	-
ENSG00000133247	1088.65	1113.47	973.814	1279.64	203.609	223.468	282.667	236.071	1113.89	236.454	2.23607	3.55662e-57	9.42393e-55	KMT5C	19	55339853	55348120	+	4775	protein_coding	lysine methyltransferase 5C [Source:HGNC Symbol;Acc:HGNC:28405]	-
ENSG00000107984	91.6489	97.8969	114.803	111.053	544.017	513.05	712.962	701.338	103.85	617.842	-2.57246	3.59176e-57	9.42393e-55	DKK1	10	52314296	52318042	+	2206	protein_coding	dickkopf WNT signaling pathway inhibitor 1 [Source:HGNC Symbol;Acc:HGNC:2891]	-
ENSG00000185112	60.8137	105.558	96.3378	117.784	620.37	912.383	757.594	699.046	95.1234	747.348	-2.97256	7.06333e-57	1.8317e-54	FAM43A	3	194686544	194689037	+	2494	protein_coding	family with sequence similarity 43 member A [Source:HGNC Symbol;Acc:HGNC:26888]	-
ENSG00000259583	409.422	566.95	382.943	424.863	57.265	27.7682	46.9204	42.4011	446.044	43.5887	3.34176	1.01582e-56	2.60399e-54	AC015712.2	15	100892859	100919283	-	6792	antisense	uncharacterized LOC101927751 [Source:NCBI gene;Acc:101927751]	-
ENSG00000143061	5044.97	5800.6	4948.55	5373.46	1813.39	1504.77	1729.19	1571.13	5291.9	1654.62	1.67679	1.20562e-56	3.05542e-54	IGSF3	1	116574399	116667755	-	7400	protein_coding	immunoglobulin superfamily member 3 [Source:HGNC Symbol;Acc:HGNC:5950]	-
ENSG00000129255	425.696	341.362	417.464	354.192	1310.73	1602.62	1482	1500.08	384.679	1473.86	-1.93725	1.57434e-56	3.94504e-54	MPDU1	17	7583529	7592789	+	3270	protein_coding	mannose-P-dolichol utilization defect 1 [Source:HGNC Symbol;Acc:HGNC:7207]	-
ENSG00000211459	40867.7	40423.7	19597.5	42642.7	284333	369370	263486	335204	35882.9	313098	-3.12525	2.0618e-56	5.10914e-54	MT-RNR1	MT	648	1601	+	954	Mt_rRNA	mitochondrially encoded 12S RNA [Source:HGNC Symbol;Acc:HGNC:7470]	-
ENSG00000128965	9.42185	15.323	16.8591	3.36525	858.974	1429.4	898.355	908.76	11.2423	1023.87	-6.50577	2.50748e-56	6.14525e-54	CHAC1	15	40952962	40956519	+	2058	protein_coding	ChaC glutathione specific gamma-glutamylcyclotransferase 1 [Source:HGNC Symbol;Acc:HGNC:28680]	-
ENSG00000086570	10196.2	10641	8236.08	9745.76	2375.44	1933.19	2755.72	2094.85	9704.74	2289.8	2.08316	2.81069e-56	6.81349e-54	FAT2	5	151504093	151568944	-	14537	protein_coding	FAT atypical cadherin 2 [Source:HGNC Symbol;Acc:HGNC:3596]	-
ENSG00000088986	2394.86	1817.48	1607.24	1927.45	7812.42	10960.5	8738.65	9330.54	1936.75	9210.53	-2.24964	3.57999e-56	8.58505e-54	DYNLL1	12	120469850	120498493	+	2957	protein_coding	dynein light chain LC8-type 1 [Source:HGNC Symbol;Acc:HGNC:15476]	-
ENSG00000237330	68.5225	69.8047	48.9717	74.0355	411.459	691.56	751.872	556.945	65.3336	602.959	-3.20661	4.84807e-56	1.15023e-53	RNF223	1	1070966	1074307	-	1902	protein_coding	ring finger protein 223 [Source:HGNC Symbol;Acc:HGNC:40020]	-
ENSG00000279259	11.1349	9.36405	12.0422	6.7305	220.576	322.64	204.848	200.546	9.81792	237.152	-4.58948	5.64907e-56	1.32616e-53	AC087741.3	17	80147250	80148596	+	1347	TEC	TEC	-
ENSG00000157514	40603.9	34801.1	18782.7	36683.7	3675.56	5004.88	3800.56	3855.07	32717.8	4084.02	3.00213	8.33786e-56	1.93699e-53	TSC22D3	X	107713221	107777342	-	4766	protein_coding	TSC22 domain family member 3 [Source:HGNC Symbol;Acc:HGNC:3051]	TSC22
ENSG00000173575	3459.53	3875.86	3143.82	3430.87	1055.16	810.566	1021.95	961.475	3477.52	962.288	1.85251	1.08837e-55	2.50235e-53	CHD2	15	92900189	93028005	+	16960	protein_coding	chromodomain helicase DNA binding protein 2 [Source:HGNC Symbol;Acc:HGNC:1917]	-
ENSG00000143457	837.688	1013.87	696.843	776.531	176.037	136.196	145.339	155.853	831.233	153.356	2.43533	1.16673e-55	2.65515e-53	GOLPH3L	1	150646225	150697144	-	3329	protein_coding	golgi phosphoprotein 3 like [Source:HGNC Symbol;Acc:HGNC:24882]	-
ENSG00000130517	412.848	421.382	358.858	467.769	54.0836	64.7924	59.5089	74.4885	415.215	63.2183	2.71789	1.35551e-55	3.0536e-53	PGPEP1	19	18340587	18369950	+	7520	protein_coding	pyroglutamyl-peptidase I [Source:HGNC Symbol;Acc:HGNC:13568]	-
ENSG00000135365	940.472	1053.03	1016.36	989.383	254.511	309.417	273.512	245.239	999.812	270.67	1.88769	1.87711e-55	4.18634e-53	PHF21A	11	45929323	46121178	-	11190	protein_coding	PHD finger protein 21A [Source:HGNC Symbol;Acc:HGNC:24156]	-
ENSG00000156966	389.722	295.393	276.168	296.983	29.6929	31.7351	32.0432	32.0874	314.567	31.3896	3.32594	3.04288e-55	6.71904e-53	B3GNT7	2	231395543	231401164	+	3806	protein_coding	UDP-GlcNAc:betaGal beta-1,3-N-acetylglucosaminyltransferase 7 [Source:HGNC Symbol;Acc:HGNC:18811]	-
ENSG00000122035	11.9914	10.2153	12.0422	11.7784	182.399	282.971	244.902	187.94	11.5068	224.553	-4.28325	5.91153e-55	1.29254e-52	RASL11A	13	27270327	27273690	+	1624	protein_coding	RAS like family 11 member A [Source:HGNC Symbol;Acc:HGNC:23802]	-
ENSG00000198888	5804.71	9995.69	11746	9195.54	56799.4	76591.2	56531.1	61707.4	9185.48	62907.3	-2.77577	1.11803e-54	2.42082e-52	MT-ND1	MT	3307	4262	+	956	protein_coding	mitochondrially encoded NADH:ubiquinone oxidoreductase core subunit 1 [Source:HGNC Symbol;Acc:HGNC:7455]	-
ENSG00000197077	2961.89	3496.19	2265.54	2815.03	702.026	576.52	646.587	563.821	2884.66	622.238	2.2121	1.22576e-54	2.62855e-52	KIAA1671	22	24952730	25197448	+	16439	protein_coding	KIAA1671 [Source:HGNC Symbol;Acc:HGNC:29345]	-
ENSG00000073756	444.54	578.017	386.957	441.689	2362.71	3391.68	2280.79	2337.79	462.801	2593.24	-2.48619	1.3127e-54	2.78817e-52	PTGS2	1	186671791	186680427	-	5269	protein_coding	prostaglandin-endoperoxide synthase 2 [Source:HGNC Symbol;Acc:HGNC:9605]	-
ENSG00000143614	1256.53	1297.35	1037.24	1256.08	295.869	177.187	227.736	245.239	1211.8	236.508	2.35303	6.21354e-54	1.30731e-51	GATAD2B	1	153789030	153923360	-	9247	protein_coding	GATA zinc finger domain containing 2B [Source:HGNC Symbol;Acc:HGNC:30778]	zf-GATA
ENSG00000108465	632.977	609.514	607.731	577.981	127.255	80.6599	125.884	82.5103	607.051	104.077	2.53763	6.32609e-54	1.31855e-51	CDK5RAP3	17	47967810	47981774	+	6070	protein_coding	CDK5 regulatory subunit associated protein 3 [Source:HGNC Symbol;Acc:HGNC:18673]	-
ENSG00000167110	3695.93	3697.1	3383.86	3632.79	1372.24	1220.48	1185.6	1141.39	3602.42	1229.93	1.55003	6.8775e-54	1.4202e-51	GOLGA2	9	128255829	128275995	-	6961	protein_coding	golgin A2 [Source:HGNC Symbol;Acc:HGNC:4425]	-
ENSG00000115350	228.694	222.183	200.704	210.328	817.616	978.498	750.727	888.132	215.477	858.743	-1.99425	7.03882e-54	1.44018e-51	POLE4	2	74958492	74970128	+	2151	protein_coding	DNA polymerase epsilon 4, accessory subunit [Source:HGNC Symbol;Acc:HGNC:18755]	-
ENSG00000205213	1458.67	1715.32	1202.62	1415.09	241.785	112.395	215.147	205.13	1447.92	193.614	2.89787	7.1613e-54	1.45192e-51	LGR4	11	27365961	27472775	-	6340	protein_coding	leucine rich repeat containing G protein-coupled receptor 4 [Source:HGNC Symbol;Acc:HGNC:13299]	-
ENSG00000245522	3.42613	9.36405	7.22533	2.52394	184.52	202.311	250.624	201.692	5.63486	209.787	-5.2145	7.44893e-54	1.49663e-51	AC026250.1	11	9754770	9759533	-	2632	lincRNA	uncharacterized LOC440028 [Source:NCBI gene;Acc:440028]	-
ENSG00000156671	1043.26	1351.83	814.857	1186.25	208.911	140.163	170.516	156.999	1099.05	169.147	2.69647	8.05824e-54	1.6046e-51	SAMD8	10	75099586	75182123	+	7348	protein_coding	sterile alpha motif domain containing 8 [Source:HGNC Symbol;Acc:HGNC:26320]	-
ENSG00000171621	941.328	892.99	697.646	1099.59	131.497	92.5606	161.361	143.247	907.89	132.166	2.77605	1.06487e-53	2.10166e-51	SPSB1	1	9292880	9369532	+	3403	protein_coding	splA/ryanodine receptor domain and SOCS box containing 1 [Source:HGNC Symbol;Acc:HGNC:30628]	-
ENSG00000275708	0.856531	1.70255	0.802815	3.36525	546.138	1335.52	917.81	424.011	1.68179	805.869	-8.90867	2.80843e-53	5.49417e-51	MIR3648-1	21	8208473	8208652	+	180	miRNA	microRNA 3648-1 [Source:HGNC Symbol;Acc:HGNC:38941]	-
ENSG00000140450	2705.78	2842.41	2296.85	2276.59	588.556	329.251	401.685	344.939	2530.41	416.108	2.60214	2.86318e-53	5.55258e-51	ARRDC4	15	97960698	97973838	+	4072	protein_coding	arrestin domain containing 4 [Source:HGNC Symbol;Acc:HGNC:28087]	-
ENSG00000078699	1001.29	1141.56	1048.48	1146.71	328.743	325.284	282.667	275.034	1084.51	302.932	1.84036	4.44984e-53	8.5552e-51	CBFA2T2	20	33490075	33650036	+	9457	protein_coding	CBFA2/RUNX1 translocation partner 2 [Source:HGNC Symbol;Acc:HGNC:1536]	-
ENSG00000188229	5361.89	5540.96	8086.75	6460.44	24568.8	34416.7	33634	33561.1	6362.51	31545.1	-2.30969	5.9533e-53	1.13479e-50	TUBB4B	9	137241213	137243707	+	2111	protein_coding	tubulin beta 4B class IVb [Source:HGNC Symbol;Acc:HGNC:20771]	-
ENSG00000225630	728.052	947.471	816.463	774.007	2694.63	3685.23	3438.93	3115.91	816.498	3233.68	-1.98538	6.60506e-53	1.24836e-50	MTND2P28	1	629640	630683	+	1044	unprocessed_pseudogene	MT-ND2 pseudogene 28 [Source:HGNC Symbol;Acc:HGNC:42129]	-
ENSG00000123066	797.431	940.661	701.66	745.402	169.674	190.41	173.949	190.232	796.289	181.066	2.13793	6.87741e-53	1.28891e-50	MED13L	12	115953872	116277719	-	37364	protein_coding	mediator complex subunit 13 like [Source:HGNC Symbol;Acc:HGNC:22962]	-
ENSG00000170776	2603.86	3367.65	2435.74	2820.08	775.198	782.798	780.482	704.776	2806.83	760.813	1.88338	1.01747e-52	1.89098e-50	AKAP13	15	85380571	85749358	+	20280	protein_coding	A-kinase anchoring protein 13 [Source:HGNC Symbol;Acc:HGNC:371]	-
ENSG00000090266	229.55	205.158	224.788	243.139	782.621	978.498	809.092	886.986	225.659	864.299	-1.93642	1.07785e-52	1.98664e-50	NDUFB2	7	140690777	140722790	+	4447	protein_coding	NADH:ubiquinone oxidoreductase subunit B2 [Source:HGNC Symbol;Acc:HGNC:7697]	-
ENSG00000279086	3.42613	2.55383	1.60563	3.36525	289.506	423.134	260.923	256.699	2.73771	307.566	-6.81725	1.56029e-52	2.85226e-50	AC073130.3	7	116209234	116211511	-	2278	TEC	TEC	-
ENSG00000104140	6973.88	5946.17	3566.1	7197.42	963.96	896.515	869.745	891.57	5920.89	905.448	2.70898	1.65753e-52	3.00539e-50	RHOV	15	40872214	40874289	-	1705	protein_coding	ras homolog family member V [Source:HGNC Symbol;Acc:HGNC:18313]	-
ENSG00000134363	1160.6	619.73	635.027	610.793	4596.04	6459.41	5986.36	5553.4	756.537	5648.8	-2.90056	1.75623e-52	3.15867e-50	FST	5	53480409	53487134	+	2969	protein_coding	follistatin [Source:HGNC Symbol;Acc:HGNC:3971]	-
ENSG00000075426	4342.61	5588.63	3864.75	5195.94	972.444	719.328	1096.34	1015.34	4747.99	950.861	2.31924	2.38215e-52	4.25013e-50	FOSL2	2	28392448	28417312	+	7157	protein_coding	FOS like 2, AP-1 transcription factor subunit [Source:HGNC Symbol;Acc:HGNC:3798]	TF_bZIP
ENSG00000164405	1131.48	936.405	926.448	1134.09	3293.8	3615.15	3142.53	3405.84	1032.1	3364.33	-1.70472	2.53964e-52	4.49516e-50	UQCRQ	5	132866560	132868031	+	1472	protein_coding	ubiquinol-cytochrome c reductase complex III subunit VII [Source:HGNC Symbol;Acc:HGNC:29594]	-
ENSG00000197119	794.861	726.991	729.759	762.229	180.279	215.534	203.703	218.882	753.46	204.599	1.8827	2.73983e-52	4.81131e-50	SLC25A29	14	100291111	100306547	-	7451	protein_coding	solute carrier family 25 member 29 [Source:HGNC Symbol;Acc:HGNC:20116]	-
ENSG00000110042	1141.76	1234.35	1217.87	1209.81	338.287	245.947	341.032	334.625	1200.95	314.973	1.92791	3.29986e-52	5.7495e-50	DTX4	11	59171430	59208587	+	6072	protein_coding	deltex E3 ubiquitin ligase 4 [Source:HGNC Symbol;Acc:HGNC:29151]	-
ENSG00000133858	1093.79	1308.41	932.871	994.431	250.269	185.121	224.303	171.897	1082.38	207.897	2.37768	3.63815e-52	6.28976e-50	ZFC3H1	12	71609472	71667725	-	9670	protein_coding	zinc finger C3H1-type containing [Source:HGNC Symbol;Acc:HGNC:28328]	-
ENSG00000163947	641.542	726.991	543.506	609.11	138.921	97.8498	117.873	131.787	630.287	121.608	2.36866	4.54798e-52	7.80224e-50	ARHGEF3	3	56727418	57079329	-	6594	protein_coding	Rho guanine nucleotide exchange factor 3 [Source:HGNC Symbol;Acc:HGNC:683]	-
ENSG00000277161	45.3962	45.969	65.028	34.4938	357.376	338.507	326.154	327.749	47.7217	337.447	-2.81927	9.36844e-52	1.59492e-49	PIGW	17	36535020	36539310	+	2799	protein_coding	phosphatidylinositol glycan anchor biosynthesis class W [Source:HGNC Symbol;Acc:HGNC:23213]	-
ENSG00000277972	616.703	465.649	606.928	568.727	1862.17	1953.03	1911.15	2134.95	564.502	1965.33	-1.79952	9.81727e-52	1.65867e-49	CISD3	17	38730235	38735044	+	2663	protein_coding	CDGSH iron sulfur domain 3 [Source:HGNC Symbol;Acc:HGNC:27578]	-
ENSG00000204103	566.167	645.268	564.379	665.478	2324.53	3162.93	2238.45	2310.29	610.323	2509.05	-2.03914	2.91587e-51	4.88945e-49	MAFB	20	40685848	40689240	-	3393	protein_coding	MAF bZIP transcription factor B [Source:HGNC Symbol;Acc:HGNC:6408]	TF_bZIP
ENSG00000007047	1302.78	1325.44	1159.26	1301.51	394.492	435.035	406.262	414.844	1272.25	412.658	1.62518	3.70732e-51	6.1702e-49	MARK4	19	45079288	45305283	+	6668	protein_coding	microtubule affinity regulating kinase 4 [Source:HGNC Symbol;Acc:HGNC:13538]	-
ENSG00000132603	227.837	233.25	240.844	247.346	785.802	729.906	842.279	834.271	237.319	798.065	-1.75004	3.93383e-51	6.49868e-49	NIP7	16	69337996	69343111	+	4749	protein_coding	NIP7, nucleolar pre-rRNA processing protein [Source:HGNC Symbol;Acc:HGNC:24328]	-
ENSG00000168268	226.981	171.107	314.703	177.517	1249.22	1876.34	1483.14	1537.9	222.577	1536.65	-2.78616	6.0867e-51	9.9813e-49	NT5DC2	3	52524385	52535054	-	4719	protein_coding	5'-nucleotidase domain containing 2 [Source:HGNC Symbol;Acc:HGNC:25717]	-
ENSG00000141994	167.88	112.369	188.662	135.451	725.356	815.855	973.885	869.796	151.09	846.223	-2.48465	8.10245e-51	1.31898e-48	DUS3L	19	5784832	5791238	-	3642	protein_coding	dihydrouridine synthase 3 like [Source:HGNC Symbol;Acc:HGNC:26920]	-
ENSG00000141441	333.191	405.208	285.802	300.348	46.6603	27.7682	34.332	25.2115	331.137	33.493	3.29433	1.12642e-50	1.82039e-48	GAREM1	18	32124877	32470484	-	7568	protein_coding	GRB2 associated regulator of MAPK1 subtype 1 [Source:HGNC Symbol;Acc:HGNC:26136]	-
ENSG00000100596	1460.39	1483.78	1217.07	1276.27	342.529	212.889	320.432	265.867	1359.37	285.429	2.24835	1.60874e-50	2.58116e-48	SPTLC2	14	77505997	77616773	-	9143	protein_coding	serine palmitoyltransferase long chain base subunit 2 [Source:HGNC Symbol;Acc:HGNC:11278]	-
ENSG00000091073	2040.26	1768.1	1754.95	2014.1	472.966	493.216	565.334	614.244	1894.35	536.44	1.82	2.58388e-50	4.11612e-48	DTX2	7	76461676	76505995	+	5042	protein_coding	deltex E3 ubiquitin ligase 2 [Source:HGNC Symbol;Acc:HGNC:15973]	-
ENSG00000186594	215.846	321.783	454.393	307.079	1987.31	3117.97	2336.87	2175.06	324.775	2404.3	-2.8872	4.08373e-50	6.45925e-48	MIR22HG	17	1711493	1717174	-	2986	lincRNA	MIR22 host gene [Source:HGNC Symbol;Acc:HGNC:28219]	-
ENSG00000143368	1349.89	1148.37	1238.74	1335.16	3522.86	4300.1	4559.29	4617.14	1268.04	4249.85	-1.74472	6.40262e-50	1.00557e-47	SF3B4	1	149923317	149928344	-	2245	protein_coding	splicing factor 3b subunit 4 [Source:HGNC Symbol;Acc:HGNC:10771]	-
ENSG00000169155	2666.38	2703.66	1273.26	2160.49	256.632	230.079	334.165	271.597	2200.95	273.118	3.00971	7.03668e-50	1.09743e-47	ZBTB43	9	126805006	126838210	+	7052	protein_coding	zinc finger and BTB domain containing 43 [Source:HGNC Symbol;Acc:HGNC:17908]	ZBTB
ENSG00000008256	4653.54	4180.62	3700.17	4014.74	1365.88	1369.9	1487.72	1305.27	4137.27	1382.19	1.58166	9.91603e-50	1.53574e-47	CYTH3	7	6161776	6272644	-	5808	protein_coding	cytohesin 3 [Source:HGNC Symbol;Acc:HGNC:9504]	-
ENSG00000164916	5230.84	5789.53	5257.63	6082.69	1538.73	1032.71	1583.85	1347.67	5590.17	1375.74	2.0219	1.25291e-49	1.92706e-47	FOXK1	7	4682309	4771443	+	13093	protein_coding	forkhead box K1 [Source:HGNC Symbol;Acc:HGNC:23480]	Fork
ENSG00000271133	14.561	17.8768	12.0422	17.6676	218.455	214.212	157.927	201.692	15.5369	198.072	-3.6746	1.28981e-49	1.97023e-47	AC004130.1	7	20328299	20331747	-	896	antisense	uncharacterized LOC101927811 [Source:NCBI gene;Acc:101927811]	-
ENSG00000132768	227.837	177.917	235.225	174.152	831.402	908.416	1163.86	980.956	203.783	971.158	-2.25225	1.30626e-49	1.98179e-47	DPH2	1	43970000	43973369	+	2930	protein_coding	DPH2 homolog [Source:HGNC Symbol;Acc:HGNC:3004]	-
ENSG00000008323	704.925	549.925	582.844	656.223	137.86	149.419	151.061	122.62	623.479	140.24	2.15368	1.37431e-49	2.07094e-47	PLEKHG6	12	6310436	6328506	+	4260	protein_coding	pleckstrin homology and RhoGEF domain containing G6 [Source:HGNC Symbol;Acc:HGNC:25562]	-
ENSG00000143878	486.51	492.889	427.098	584.712	1947.01	3193.34	2418.12	2289.66	497.802	2462.03	-2.30591	1.5092e-49	2.25894e-47	RHOB	2	20447074	20449445	+	2372	protein_coding	ras homolog family member B [Source:HGNC Symbol;Acc:HGNC:668]	-
ENSG00000105856	962.741	1008.76	710.491	883.378	193.004	199.666	219.725	174.188	891.343	196.646	2.18047	1.92104e-49	2.8562e-47	HBP1	7	107168961	107202529	+	6351	protein_coding	HMG-box transcription factor 1 [Source:HGNC Symbol;Acc:HGNC:23200]	HMG
ENSG00000126775	795.718	907.461	663.928	752.133	160.13	122.973	189.971	151.269	779.81	156.086	2.31728	2.50662e-49	3.70216e-47	ATG14	14	55366392	55411858	-	5052	protein_coding	autophagy related 14 [Source:HGNC Symbol;Acc:HGNC:19962]	-
ENSG00000064999	1198.29	1256.48	1145.62	1108.01	395.552	383.465	376.508	331.187	1177.1	371.678	1.66304	4.86347e-49	7.13586e-47	ANKS1A	6	34889265	35091413	+	8495	protein_coding	ankyrin repeat and sterile alpha motif domain containing 1A [Source:HGNC Symbol;Acc:HGNC:20961]	-
ENSG00000075420	805.996	984.927	721.731	770.642	208.911	149.419	177.382	171.897	820.824	176.902	2.21046	7.80379e-49	1.13752e-46	FNDC3B	3	172039628	172401665	+	13270	protein_coding	fibronectin type III domain containing 3B [Source:HGNC Symbol;Acc:HGNC:24670]	-
ENSG00000166949	6788.87	8496.6	6184.08	7871.32	1529.19	991.721	1732.62	1465.7	7335.22	1429.81	2.3584	9.17388e-49	1.32854e-46	SMAD3	15	67063763	67195195	+	9113	protein_coding	SMAD family member 3 [Source:HGNC Symbol;Acc:HGNC:6769]	MH1
ENSG00000164032	2274.95	1911.12	1931.57	2067.1	5957.68	8105.66	6484.18	7015.67	2046.19	6890.8	-1.75161	1.77846e-48	2.55892e-46	H2AFZ	4	99948086	99950388	-	2303	protein_coding	H2A histone family member Z [Source:HGNC Symbol;Acc:HGNC:4741]	-
ENSG00000265241	816.274	786.58	716.914	786.627	2284.24	2749.05	2178.94	2346.96	776.599	2389.8	-1.6214	2.21401e-48	3.16518e-46	RBM8A	1	145917714	145927678	-	5585	protein_coding	RNA binding motif protein 8A [Source:HGNC Symbol;Acc:HGNC:9905]	-
ENSG00000113070	1416.7	1520.38	958.561	1732.26	7153.88	13118.5	9718.26	8538.67	1406.98	9632.32	-2.77529	3.42985e-48	4.87214e-46	HBEGF	5	140332843	140346631	-	3018	protein_coding	heparin binding EGF like growth factor [Source:HGNC Symbol;Acc:HGNC:3059]	-
ENSG00000184502	72.8052	49.3741	50.5773	44.5895	402.976	486.604	310.133	383.902	54.3365	395.904	-2.86507	6.02222e-48	8.50048e-46	GAST	17	41712326	41715969	+	470	protein_coding	gastrin [Source:HGNC Symbol;Acc:HGNC:4164]	-
ENSG00000171604	1096.36	1005.36	933.674	1194.66	250.269	153.386	224.303	247.531	1057.51	218.872	2.26835	8.56399e-48	1.20122e-45	CXXC5	5	139647299	139683882	+	3852	protein_coding	CXXC finger protein 5 [Source:HGNC Symbol;Acc:HGNC:26943]	-
ENSG00000168806	5.13919	10.2153	18.4647	5.04787	209.972	173.221	212.859	189.086	9.71678	196.284	-4.32506	9.71663e-48	1.35438e-45	LCMT2	15	43323649	43330605	-	6957	protein_coding	leucine carboxyl methyltransferase 2 [Source:HGNC Symbol;Acc:HGNC:17558]	-
ENSG00000144485	69.379	51.9279	52.9858	79.0833	396.613	706.105	463.482	458.391	63.344	506.148	-2.99726	2.26628e-47	3.13929e-45	HES6	2	238238267	238240662	-	2037	protein_coding	hes family bHLH transcription factor 6 [Source:HGNC Symbol;Acc:HGNC:18254]	bHLH
ENSG00000175793	21551.2	20359.1	20361.8	27680	70335.2	95061	90269.2	86610.6	22488	85569	-1.92792	2.37946e-47	3.27572e-45	SFN	1	26863138	26864457	+	1320	protein_coding	stratifin [Source:HGNC Symbol;Acc:HGNC:10773]	-
ENSG00000128881	668.095	765.298	569.196	641.08	161.19	170.576	159.072	150.123	660.917	160.24	2.04505	2.42783e-47	3.3218e-45	TTBK2	15	42738734	42920809	-	12917	protein_coding	tau tubulin kinase 2 [Source:HGNC Symbol;Acc:HGNC:19141]	-
ENSG00000198435	287.795	407.762	396.591	470.293	1744.46	2442.28	1998.12	1696.05	390.61	1970.23	-2.33402	2.56649e-47	3.49011e-45	NRARP	9	137300482	137302251	-	1770	protein_coding	NOTCH regulated ankyrin repeat protein [Source:HGNC Symbol;Acc:HGNC:33843]	-
ENSG00000256940	45.3962	35.7536	26.4929	31.1285	237.544	289.582	264.357	239.509	34.6928	257.748	-2.89494	4.43846e-47	5.99918e-45	AP001453.2	11	64245964	64248217	+	597	antisense	uncharacterized LOC105369340 [Source:NCBI gene;Acc:105369340]	-
ENSG00000135709	393.148	491.187	474.464	494.691	96.5021	97.8498	111.007	93.9701	463.372	99.8322	2.21464	4.51454e-47	6.06526e-45	KIAA0513	16	85027751	85094230	+	8837	protein_coding	KIAA0513 [Source:HGNC Symbol;Acc:HGNC:29058]	-
ENSG00000167074	1394.43	1551.03	1026.8	1502.58	332.985	285.616	308.988	246.385	1368.71	293.494	2.22045	4.55179e-47	6.07868e-45	TEF	22	41367333	41399326	+	4715	protein_coding	TEF, PAR bZIP transcription factor [Source:HGNC Symbol;Acc:HGNC:11722]	TF_bZIP
ENSG00000226479	76.2313	72.3585	123.633	92.5443	514.324	457.514	550.457	577.572	91.1919	524.967	-2.5236	4.94675e-47	6.56682e-45	TMEM185B	2	120221278	120223408	-	2131	protein_coding	transmembrane protein 185B [Source:HGNC Symbol;Acc:HGNC:18896]	-
ENSG00000115602	10.2784	8.51277	7.22533	7.57181	226.939	136.196	163.649	216.59	8.39707	185.844	-4.47359	5.12612e-47	6.76466e-45	IL1RL1	2	102311502	102352037	+	5746	protein_coding	interleukin 1 receptor like 1 [Source:HGNC Symbol;Acc:HGNC:5998]	-
ENSG00000100647	3502.36	3556.64	2353.85	3262.61	529.171	292.227	583.645	528.295	3168.86	483.334	2.71118	5.95037e-47	7.80619e-45	SUSD6	14	69611596	69715142	+	5830	protein_coding	sushi domain containing 6 [Source:HGNC Symbol;Acc:HGNC:19956]	-
ENSG00000101670	4962.74	4098.05	2559.37	3410.68	712.631	617.511	675.197	739.155	3757.71	686.123	2.45287	7.90825e-47	1.0314e-44	LIPG	18	49560699	49599182	+	13112	protein_coding	lipase G, endothelial type [Source:HGNC Symbol;Acc:HGNC:6623]	-
ENSG00000136237	1017.56	1550.18	1296.55	1251.03	300.111	222.145	290.678	299.1	1278.83	278.009	2.19942	8.6861e-47	1.12626e-44	RAPGEF5	7	22118238	22357144	-	10245	protein_coding	Rap guanine nucleotide exchange factor 5 [Source:HGNC Symbol;Acc:HGNC:16862]	-
ENSG00000111639	662.099	598.448	641.449	678.939	2233.33	2239.97	1731.48	2067.34	645.234	2068.03	-1.68025	9.1447e-47	1.17887e-44	MRPL51	12	6491886	6493841	-	1551	protein_coding	mitochondrial ribosomal protein L51 [Source:HGNC Symbol;Acc:HGNC:14044]	-
ENSG00000185591	2702.36	2998.2	2042.36	2517.21	681.877	477.348	580.211	642.893	2565.03	595.582	2.1052	1.10003e-46	1.40994e-44	SP1	12	53380176	53416446	+	8083	protein_coding	Sp1 transcription factor [Source:HGNC Symbol;Acc:HGNC:11205]	zf-C2H2
ENSG00000137267	524.197	551.627	432.717	599.855	1756.13	2573.18	2557.74	2196.84	527.099	2270.97	-2.10706	3.73328e-46	4.75769e-44	TUBB2A	6	3153669	3157526	-	1727	protein_coding	tubulin beta 2A class IIa [Source:HGNC Symbol;Acc:HGNC:12412]	-
ENSG00000259230	19.7002	19.5794	25.6901	13.461	193.004	232.724	199.126	176.48	19.6077	200.334	-3.34817	3.90915e-46	4.95351e-44	LINC02323	14	102545254	102555826	+	1603	lincRNA	long intergenic non-protein coding RNA 2323 [Source:HGNC Symbol;Acc:HGNC:53242]	-
ENSG00000117139	3188.01	3783.93	2856.42	3216.34	953.355	663.792	916.665	731.133	3261.17	816.236	1.99722	5.37119e-46	6.7677e-44	KDM5B	1	202724495	202809470	-	25882	protein_coding	lysine demethylase 5B [Source:HGNC Symbol;Acc:HGNC:18039]	ARID
ENSG00000182197	2251.82	2195.44	1944.42	2180.68	839.886	747.096	740.428	743.739	2143.09	767.787	1.48029	6.85791e-46	8.59242e-44	EXT1	8	117794490	118111853	-	8325	protein_coding	exostosin glycosyltransferase 1 [Source:HGNC Symbol;Acc:HGNC:3512]	-
ENSG00000124107	1846.68	1161.99	1286.91	1346.94	5513.34	7107.33	5525.17	6466.75	1410.63	6153.15	-2.12496	8.09072e-46	1.00804e-43	SLPI	20	45252239	45254564	-	596	protein_coding	secretory leukocyte peptidase inhibitor [Source:HGNC Symbol;Acc:HGNC:11092]	-
ENSG00000172428	207.281	182.173	188.662	185.089	628.854	744.452	616.832	674.98	190.801	666.28	-1.80323	8.22703e-46	1.01933e-43	COPS9	2	240126563	240136807	-	2039	protein_coding	COP9 signalosome subunit 9 [Source:HGNC Symbol;Acc:HGNC:21314]	-
ENSG00000166166	301.499	222.183	333.168	234.726	1108.18	1209.9	1509.47	1568.84	272.894	1349.1	-2.30517	1.00485e-45	1.23814e-43	TRMT61A	14	103529184	103537073	+	3229	protein_coding	tRNA methyltransferase 61A [Source:HGNC Symbol;Acc:HGNC:23790]	-
ENSG00000198763	17430.4	22585.2	23524.9	21719.3	63168.5	75155.2	63759.2	72010.9	21315	68523.5	-1.68471	1.37057e-45	1.67947e-43	MT-ND2	MT	4470	5511	+	1042	protein_coding	mitochondrially encoded NADH:ubiquinone oxidoreductase core subunit 2 [Source:HGNC Symbol;Acc:HGNC:7456]	-
ENSG00000164970	509.636	520.13	474.464	520.772	117.711	55.5364	90.4077	84.8023	506.251	87.1144	2.52839	1.74485e-45	2.12643e-43	FAM219A	9	34398184	34458570	-	3782	protein_coding	family with sequence similarity 219 member A [Source:HGNC Symbol;Acc:HGNC:19920]	-
ENSG00000284946	309.208	291.137	203.112	219.582	23.3302	11.9006	25.1768	18.3356	255.76	19.6858	3.68315	2.61924e-45	3.17469e-43	AC068831.7	15	90966190	91022566	-	7148	protein_coding	novel transcript	-
ENSG00000133816	1247.11	1396.95	1072.56	1165.22	337.227	358.342	385.663	375.88	1220.46	364.278	1.74439	3.07486e-45	3.70679e-43	MICAL2	11	12094008	12359144	+	20191	protein_coding	microtubule associated monooxygenase, calponin and LIM domain containing 2 [Source:HGNC Symbol;Acc:HGNC:24693]	-
ENSG00000224687	21.4133	16.1743	8.83096	15.9849	198.306	362.309	216.292	208.568	15.6009	246.369	-3.98361	3.30843e-45	3.96691e-43	RASAL2-AS1	1	178091508	178093984	-	2356	lincRNA	RASAL2 antisense RNA 1 [Source:HGNC Symbol;Acc:HGNC:44170]	-
ENSG00000069020	448.822	626.54	553.942	519.931	85.8974	44.958	96.1297	91.6782	537.309	79.6658	2.7453	5.322e-45	6.34713e-43	MAST4	5	66596361	67169595	+	14675	protein_coding	microtubule associated serine/threonine kinase family member 4 [Source:HGNC Symbol;Acc:HGNC:19037]	-
ENSG00000141582	888.223	780.621	753.843	836.264	2759.32	4372.83	3771.95	2935.99	814.738	3460.02	-2.08613	6.10484e-45	7.24203e-43	CBX4	17	79833156	79839429	-	2880	protein_coding	chromobox 4 [Source:HGNC Symbol;Acc:HGNC:1554]	-
ENSG00000222043	8.56531	2.55383	2.40844	3.36525	143.162	276.359	183.104	209.714	4.22321	203.085	-5.59461	7.25325e-45	8.55883e-43	AC079305.1	2	177264359	177265515	+	499	antisense	novel transcript	-
ENSG00000116560	1040.69	1205.41	1180.14	1108.01	3972.49	3087.56	4503.22	4072.8	1133.56	3909.02	-1.78613	8.25604e-45	9.69085e-43	SFPQ	1	35176378	35193148	-	7426	protein_coding	splicing factor proline and glutamine rich [Source:HGNC Symbol;Acc:HGNC:10774]	-
ENSG00000134030	1215.42	1062.39	1124.74	1246.82	349.953	380.821	414.273	365.567	1162.34	377.653	1.6224	1.08204e-44	1.26344e-42	CTIF	18	48539046	48863217	+	8100	protein_coding	cap binding complex dependent translation initiation factor [Source:HGNC Symbol;Acc:HGNC:23925]	-
ENSG00000168137	1377.3	1733.2	1518.12	1453.79	426.306	275.037	397.107	396.508	1520.6	373.74	2.02191	1.31756e-44	1.53043e-42	SETD5	3	9397615	9479240	+	10808	protein_coding	SET domain containing 5 [Source:HGNC Symbol;Acc:HGNC:25566]	-
ENSG00000146834	407.709	462.243	666.336	557.79	1997.91	2225.42	2476.48	2235.8	523.52	2233.9	-2.09272	1.38962e-44	1.60577e-42	MEPCE	7	100428790	100434126	+	3420	protein_coding	methylphosphate capping enzyme [Source:HGNC Symbol;Acc:HGNC:20247]	-
ENSG00000149806	4844.54	3878.42	4564.81	4603.66	13275.9	18390.5	13745.4	15454.6	4472.86	15216.6	-1.7663	2.21544e-44	2.54685e-42	FAU	11	65120628	65122473	-	1846	protein_coding	FAU, ubiquitin like and ribosomal protein S30 fusion [Source:HGNC Symbol;Acc:HGNC:3597]	-
ENSG00000112406	769.165	831.698	569.999	761.387	181.339	120.329	135.039	120.328	733.062	139.259	2.39192	2.78559e-44	3.18586e-42	HECA	6	139135112	139180802	+	5614	protein_coding	hdc homolog, cell cycle regulator [Source:HGNC Symbol;Acc:HGNC:21041]	-
ENSG00000131069	9942.62	11801.3	7812.19	11600	1861.11	2790.04	2355.18	2377.9	10289	2346.06	2.13312	2.81194e-44	3.19959e-42	ACSS2	20	34872146	34927962	+	5385	protein_coding	acyl-CoA synthetase short chain family member 2 [Source:HGNC Symbol;Acc:HGNC:15814]	-
ENSG00000110400	8898.51	10230.6	9085.46	10118.5	2973.54	2362.94	3390.86	3023.09	9583.27	2937.61	1.70557	4.18639e-44	4.73934e-42	NECTIN1	11	119623408	119729084	-	7701	protein_coding	nectin cell adhesion molecule 1 [Source:HGNC Symbol;Acc:HGNC:9706]	-
ENSG00000147684	1507.5	1356.08	1477.18	1536.24	3931.13	4921.58	3895.54	4227.51	1469.25	4243.94	-1.53006	4.44809e-44	5.01017e-42	NDUFB9	8	124539101	124580648	+	4106	protein_coding	NADH:ubiquinone oxidoreductase subunit B9 [Source:HGNC Symbol;Acc:HGNC:7704]	-
ENSG00000072864	1149.47	1084.53	941.702	1039.86	327.683	235.368	305.555	302.538	1053.89	292.786	1.84473	4.69479e-44	5.26147e-42	NDE1	16	15643267	15726353	+	5512	protein_coding	nudE neurodevelopment protein 1 [Source:HGNC Symbol;Acc:HGNC:17619]	-
ENSG00000134215	317.773	365.198	338.788	393.734	69.9905	48.9249	70.9529	72.1965	353.873	65.5162	2.4261	5.63767e-44	6.28657e-42	VAV3	1	107571160	107965144	-	7271	protein_coding	vav guanine nucleotide exchange factor 3 [Source:HGNC Symbol;Acc:HGNC:12659]	-
ENSG00000168802	723.769	706.56	759.463	643.604	1802.79	1859.15	1824.18	1883.99	708.349	1842.52	-1.37895	7.12227e-44	7.90253e-42	CHTF8	16	69118010	69132584	-	3383	protein_coding	chromosome transmission fidelity factor 8 [Source:HGNC Symbol;Acc:HGNC:24353]	-
ENSG00000101384	5294.22	6640.81	4436.36	6083.53	1506.92	1249.57	1649.08	1304.12	5613.73	1427.42	1.97517	1.00296e-43	1.10732e-41	JAG1	20	10637684	10673999	-	9298	protein_coding	jagged 1 [Source:HGNC Symbol;Acc:HGNC:6188]	-
ENSG00000179933	668.095	653.781	678.379	677.256	1616.14	1834.02	1903.14	1973.37	669.378	1831.67	-1.45203	1.01446e-43	1.1145e-41	C14orf119	14	23094765	23100462	+	3676	protein_coding	chromosome 14 open reading frame 119 [Source:HGNC Symbol;Acc:HGNC:20270]	-
ENSG00000168970	366.595	371.157	412.647	320.54	76.3533	76.6931	73.2417	55.0069	367.735	70.3237	2.38786	1.03776e-43	1.13452e-41	JMJD7-PLA2G4B	15	41828095	41848155	+	7862	protein_coding	JMJD7-PLA2G4B readthrough [Source:HGNC Symbol;Acc:HGNC:34449]	-
ENSG00000175895	979.015	915.974	691.224	872.441	216.334	137.519	171.66	199.4	864.663	181.228	2.25003	1.49206e-43	1.62321e-41	PLEKHF2	8	95133804	95156684	+	3137	protein_coding	pleckstrin homology and FYVE domain containing 2 [Source:HGNC Symbol;Acc:HGNC:20757]	-
ENSG00000085185	381.156	489.484	438.337	418.132	89.0788	100.494	106.429	95.1161	431.777	97.7796	2.14437	1.63132e-43	1.76611e-41	BCORL1	X	129981107	130058083	+	7996	protein_coding	BCL6 corepressor like 1 [Source:HGNC Symbol;Acc:HGNC:25657]	-
ENSG00000153815	1804.71	2020.93	1901.07	2298.46	621.431	477.348	652.309	561.529	2006.29	578.154	1.79364	2.02968e-43	2.18676e-41	CMIP	16	81445170	81711762	+	12715	protein_coding	c-Maf inducing protein [Source:HGNC Symbol;Acc:HGNC:24319]	-
ENSG00000087494	903.641	1095.59	1169.7	1016.3	2850.52	2946.07	2967.43	2901.61	1046.31	2916.41	-1.47865	2.07996e-43	2.23015e-41	PTHLH	12	27958084	27972705	-	3377	protein_coding	parathyroid hormone like hormone [Source:HGNC Symbol;Acc:HGNC:9607]	-
ENSG00000074964	447.966	537.156	497.745	475.341	101.804	129.585	131.606	118.036	489.552	120.258	2.02861	2.25884e-43	2.41037e-41	ARHGEF10L	1	17539835	17697874	+	7817	protein_coding	Rho guanine nucleotide exchange factor 10 like [Source:HGNC Symbol;Acc:HGNC:25540]	-
ENSG00000164236	485.653	660.591	542.703	508.994	127.255	95.2052	132.751	111.16	549.485	116.593	2.23244	2.30622e-43	2.44042e-41	ANKRD33B	5	10564330	10657816	+	9783	protein_coding	ankyrin repeat domain 33B [Source:HGNC Symbol;Acc:HGNC:35240]	-
ENSG00000114541	915.632	1293.09	639.041	1122.31	168.613	150.742	161.361	156.999	992.518	159.429	2.63715	2.30889e-43	2.44042e-41	FRMD4B	3	69169990	69542583	-	9993	protein_coding	FERM domain containing 4B [Source:HGNC Symbol;Acc:HGNC:24886]	-
ENSG00000158246	2327.2	1956.23	1286.11	2513.84	328.743	417.845	337.598	320.874	2020.85	351.265	2.52542	2.52496e-43	2.65621e-41	TENT5B	1	27005020	27012836	-	2368	protein_coding	terminal nucleotidyltransferase 5B [Source:HGNC Symbol;Acc:HGNC:28273]	-
ENSG00000148841	2096.79	2238.01	1184.15	2080.56	326.622	256.525	375.364	327.749	1899.88	321.565	2.56143	2.59457e-43	2.71663e-41	ITPRIP	10	104309698	104338448	-	7279	protein_coding	inositol 1,4,5-trisphosphate receptor interacting protein [Source:HGNC Symbol;Acc:HGNC:29370]	-
ENSG00000146072	3323.34	3345.52	2725.56	3340.85	1188.78	1027.42	1137.53	1062.32	3183.82	1104.01	1.52743	2.6609e-43	2.77306e-41	TNFRSF21	6	47231532	47309905	-	3595	protein_coding	TNF receptor superfamily member 21 [Source:HGNC Symbol;Acc:HGNC:13469]	-
ENSG00000178913	513.919	618.878	569.999	526.661	1663.87	1793.03	1552.95	1518.42	557.364	1632.07	-1.54966	3.18534e-43	3.30416e-41	TAF7	5	141260225	141320821	-	2723	protein_coding	TATA-box binding protein associated factor 7 [Source:HGNC Symbol;Acc:HGNC:11541]	-
ENSG00000131652	450.536	429.044	490.52	489.644	1395.57	1968.9	1557.53	1523	464.936	1611.25	-1.7922	3.39388e-43	3.50418e-41	THOC6	16	3024027	3027755	+	1860	protein_coding	THO complex 6 [Source:HGNC Symbol;Acc:HGNC:28369]	-
ENSG00000089009	10431.7	10337.9	10223.8	10433.1	27536	34883.4	25953.9	29194.9	10356.6	29392	-1.50483	3.62432e-43	3.72486e-41	RPL6	12	112405190	112418838	-	4447	protein_coding	ribosomal protein L6 [Source:HGNC Symbol;Acc:HGNC:10362]	-
ENSG00000173209	1125.48	1146.67	1058.91	1142.5	427.366	367.598	399.396	404.53	1118.39	399.722	1.48281	3.68335e-43	3.76817e-41	AHSA2P	2	61177418	61191203	+	9083	transcribed_unitary_pseudogene	activator of HSP90 ATPase homolog 2, pseudogene [Source:HGNC Symbol;Acc:HGNC:20437]	-
ENSG00000198931	975.589	691.237	855.801	795.881	2797.5	3824.07	2803.78	3460.85	829.627	3221.55	-1.95696	3.71042e-43	3.77853e-41	APRT	16	88809339	88811944	-	1803	protein_coding	adenine phosphoribosyltransferase [Source:HGNC Symbol;Acc:HGNC:626]	-
ENSG00000179388	145.61	262.193	164.577	265.855	1140	1412.21	1352.68	1070.34	209.559	1243.81	-2.56936	4.52788e-43	4.59003e-41	EGR3	8	22687659	22693302	-	4855	protein_coding	early growth response 3 [Source:HGNC Symbol;Acc:HGNC:3240]	zf-C2H2
ENSG00000173727	37.6874	29.7947	39.3379	47.9548	231.181	263.137	230.025	240.655	38.6937	241.249	-2.63857	4.80281e-43	4.84671e-41	AP000769.1	11	65455258	65466720	+	1772	transcribed_unprocessed_pseudogene	Finkel-Biskis-Reilly murine sarcoma virus (FBR-MuSV) ubiquitously expressed (FAU) pseudogene	-
ENSG00000126903	477.945	475.013	541.097	502.263	1304.37	1651.55	1579.27	1685.73	499.079	1555.23	-1.63913	5.41734e-43	5.44223e-41	SLC10A3	X	154487306	154490690	-	2247	protein_coding	solute carrier family 10 member 3 [Source:HGNC Symbol;Acc:HGNC:22979]	-
ENSG00000130449	644.112	768.703	414.252	630.143	88.0184	95.2052	102.996	111.16	614.302	99.3449	2.62838	7.45217e-43	7.45283e-41	ZSWIM6	5	61332273	61546170	+	5501	protein_coding	zinc finger SWIM-type containing 6 [Source:HGNC Symbol;Acc:HGNC:29316]	-
ENSG00000165175	5392.72	4459.84	4034.14	5360.84	1400.87	1408.24	1603.31	1578.01	4811.89	1497.61	1.68382	1.0057e-42	1.0013e-40	MID1IP1	X	38801432	38806537	+	3790	protein_coding	MID1 interacting protein 1 [Source:HGNC Symbol;Acc:HGNC:20715]	-
ENSG00000119138	335.76	363.495	211.14	346.621	36.0557	19.8344	32.0432	13.7517	314.254	25.4213	3.61559	1.09648e-42	1.08683e-40	KLF9	9	70384597	70414624	-	5175	protein_coding	Kruppel like factor 9 [Source:HGNC Symbol;Acc:HGNC:1123]	zf-C2H2
ENSG00000123131	863.384	666.55	722.533	642.762	2238.64	3000.29	2404.39	2544.07	723.807	2546.84	-1.81474	1.33528e-42	1.31767e-40	PRDX4	X	23664262	23686399	+	1904	protein_coding	peroxiredoxin 4 [Source:HGNC Symbol;Acc:HGNC:17169]	-
ENSG00000112972	5869.81	6002.35	2813.06	4889.71	922.602	769.575	790.781	758.637	4893.73	810.399	2.59392	1.52658e-42	1.49981e-40	HMGCS1	5	43289395	43313512	-	4702	protein_coding	3-hydroxy-3-methylglutaryl-CoA synthase 1 [Source:HGNC Symbol;Acc:HGNC:5007]	-
ENSG00000129422	649.251	750.826	633.421	656.223	200.427	206.278	191.115	213.152	672.43	202.743	1.73003	1.73893e-42	1.70095e-40	MTUS1	8	17643795	17800917	-	12010	protein_coding	microtubule associated scaffold protein 1 [Source:HGNC Symbol;Acc:HGNC:29789]	-
ENSG00000122026	6139.62	5816.78	6283.63	5556.02	17014.1	17579.9	13822.1	16415	5949.01	16207.8	-1.44593	1.99302e-42	1.94097e-40	RPL21	13	27251309	27256691	+	2249	protein_coding	ribosomal protein L21 [Source:HGNC Symbol;Acc:HGNC:10313]	-
ENSG00000119669	2219.27	2362.29	1923.54	2688.83	516.445	380.821	648.875	526.003	2298.49	518.036	2.14821	2.02994e-42	1.96834e-40	IRF2BPL	14	77024543	77028699	-	4157	protein_coding	interferon regulatory factor 2 binding protein like [Source:HGNC Symbol;Acc:HGNC:14282]	-
ENSG00000233052	3.42613	1.70255	6.42252	5.88918	128.316	171.898	146.483	184.502	4.3601	157.8	-5.16604	2.22207e-42	2.14531e-40	AL513304.1	10	1361001	1361637	-	359	sense_intronic	novel transcript	-
ENSG00000124496	1319.06	1361.19	1287.72	1298.14	505.84	400.655	469.204	475.58	1316.53	462.82	1.50626	2.34183e-42	2.25119e-40	TRERF1	6	42224931	42452051	-	7732	protein_coding	transcriptional regulating factor 1 [Source:HGNC Symbol;Acc:HGNC:18273]	zf-C2H2
ENSG00000134107	11758.5	10096.1	4887.54	10467.6	1290.58	1510.06	1501.45	1274.33	9302.44	1394.11	2.73838	2.36682e-42	2.26544e-40	BHLHE40	3	4979116	4985323	+	3837	protein_coding	basic helix-loop-helix family member e40 [Source:HGNC Symbol;Acc:HGNC:1046]	bHLH
ENSG00000110321	5787.58	5743.57	4975.85	4982.25	13094.6	13012.7	13138.9	13182.2	5372.31	13107.1	-1.28677	2.94867e-42	2.81031e-40	EIF4G2	11	10797050	10809110	-	8655	protein_coding	eukaryotic translation initiation factor 4 gamma 2 [Source:HGNC Symbol;Acc:HGNC:3297]	-
ENSG00000107554	1274.52	1425.04	862.223	1224.95	289.506	219.501	273.512	228.049	1196.68	252.642	2.2419	4.7662e-42	4.52322e-40	DNMBP	10	99875577	100009919	-	8461	protein_coding	dynamin binding protein [Source:HGNC Symbol;Acc:HGNC:30373]	-
ENSG00000052802	3118.63	3206.76	1380.04	2902.53	431.608	372.887	318.144	307.122	2651.99	357.44	2.891	6.85396e-42	6.47699e-40	MSMO1	4	165327623	165343160	+	2892	protein_coding	methylsterol monooxygenase 1 [Source:HGNC Symbol;Acc:HGNC:10545]	-
ENSG00000108219	2119.92	2489.13	1962.88	2455.79	548.259	404.622	606.533	654.353	2256.93	553.442	2.02647	7.29474e-42	6.86444e-40	TSPAN14	10	80454166	80533123	+	17888	protein_coding	tetraspanin 14 [Source:HGNC Symbol;Acc:HGNC:23303]	-
ENSG00000087086	7238.55	5788.68	6374.35	6137.37	20806.3	32779.7	21692.1	24660.3	6384.74	24984.6	-1.96829	7.95698e-42	7.45616e-40	FTL	19	48965301	48966878	+	878	protein_coding	ferritin light chain [Source:HGNC Symbol;Acc:HGNC:3999]	-
ENSG00000174282	2248.39	2381.02	1999.81	2248.83	675.514	448.258	680.919	622.265	2219.51	606.739	1.86933	9.74593e-42	9.09429e-40	ZBTB4	17	7459366	7484263	-	6126	protein_coding	zinc finger and BTB domain containing 4 [Source:HGNC Symbol;Acc:HGNC:23847]	ZBTB
ENSG00000117395	1253.96	946.62	1163.28	1015.46	3140.03	3489.53	3120.78	3174.36	1094.83	3231.18	-1.56116	1.02689e-41	9.54236e-40	EBNA1BP2	1	43164175	43270936	-	3561	protein_coding	EBNA1 binding protein 2 [Source:HGNC Symbol;Acc:HGNC:15531]	-
ENSG00000214756	46.2527	35.7536	51.3802	51.32	240.725	416.523	322.721	310.56	46.1766	322.632	-2.8012	1.15913e-41	1.07265e-39	CSKMT	11	62665309	62668496	+	3185	protein_coding	citrate synthase lysine methyltransferase [Source:HGNC Symbol;Acc:HGNC:33113]	-
ENSG00000164463	485.653	398.398	231.211	309.603	34.9953	15.8675	36.6208	22.9195	356.216	27.6008	3.67599	1.2485e-41	1.15058e-39	CREBRF	5	173056352	173139284	+	12333	protein_coding	CREB3 regulatory factor [Source:HGNC Symbol;Acc:HGNC:24050]	-
ENSG00000139636	553.319	516.725	523.435	516.566	133.618	74.0485	129.317	110.014	527.511	111.749	2.23108	1.34898e-41	1.23807e-39	LMBR1L	12	49096551	49110900	-	6047	protein_coding	limb development membrane protein 1 like [Source:HGNC Symbol;Acc:HGNC:18268]	-
ENSG00000113845	686.082	684.427	708.083	710.909	1742.34	2036.33	1724.61	1773.97	697.375	1819.31	-1.38284	1.85478e-41	1.6953e-39	TIMMDC1	3	119498532	119525090	+	2730	protein_coding	translocase of inner mitochondrial membrane domain containing 1 [Source:HGNC Symbol;Acc:HGNC:1321]	-
ENSG00000105738	609.85	585.679	501.759	556.107	120.893	92.5606	159.072	107.722	563.349	120.062	2.22613	2.50199e-41	2.27753e-39	SIPA1L3	19	37907228	38208372	+	10335	protein_coding	signal induced proliferation associated 1 like 3 [Source:HGNC Symbol;Acc:HGNC:23801]	-
ENSG00000149503	2599.57	2621.08	2294.44	2367.45	852.612	711.394	914.377	906.468	2470.64	846.213	1.54482	2.68222e-41	2.43166e-39	INCENP	11	62123973	62153163	+	4473	protein_coding	inner centromere protein [Source:HGNC Symbol;Acc:HGNC:6058]	-
ENSG00000124772	5.99572	6.81022	9.63378	8.41312	107.107	186.443	164.794	189.086	7.71321	161.858	-4.38448	3.5808e-41	3.23315e-39	CPNE5	6	36740775	36840002	-	6330	protein_coding	copine 5 [Source:HGNC Symbol;Acc:HGNC:2318]	-
ENSG00000125814	659.529	743.165	490.52	566.203	127.255	56.8586	94.9853	81.3644	614.854	90.1159	2.76169	3.68897e-41	3.3174e-39	NAPB	20	23374519	23421519	-	5234	protein_coding	NSF attachment protein beta [Source:HGNC Symbol;Acc:HGNC:15751]	-
ENSG00000081041	19.7002	5.10766	8.02815	3.36525	160.13	199.666	171.66	192.524	9.05032	180.995	-4.32583	4.26338e-41	3.81855e-39	CXCL2	4	74097035	74099293	-	1500	protein_coding	C-X-C motif chemokine ligand 2 [Source:HGNC Symbol;Acc:HGNC:4603]	-
ENSG00000065361	658.673	724.437	670.35	652.858	173.916	115.04	163.649	197.108	676.579	162.428	2.05359	5.98738e-41	5.34122e-39	ERBB3	12	56076799	56103505	+	9039	protein_coding	erb-b2 receptor tyrosine kinase 3 [Source:HGNC Symbol;Acc:HGNC:3431]	-
ENSG00000169184	1292.51	1459.09	1198.6	1385.64	355.255	183.799	312.422	278.472	1333.96	282.487	2.2357	6.45265e-41	5.73334e-39	MN1	22	27748277	27801498	-	7693	protein_coding	MN1 proto-oncogene, transcriptional regulator [Source:HGNC Symbol;Acc:HGNC:7180]	-
ENSG00000162522	9956.32	10185.5	8728.2	10270.7	3594.97	3683.91	4213.69	3821.83	9785.2	3828.6	1.35375	6.74139e-41	5.96613e-39	KIAA1522	1	32741885	32774970	+	5965	protein_coding	KIAA1522 [Source:HGNC Symbol;Acc:HGNC:29301]	-
ENSG00000164442	614.99	824.887	1209.04	938.063	4092.32	6803.2	5419.88	4646.94	896.745	5240.59	-2.5466	7.14884e-41	6.28429e-39	CITED2	6	139371807	139374620	-	2535	protein_coding	Cbp/p300 interacting transactivator with Glu/Asp rich carboxy-terminal domain 2 [Source:HGNC Symbol;Acc:HGNC:1987]	-
ENSG00000177169	1903.21	1781.72	1534.98	1912.3	567.347	608.255	662.608	563.821	1783.05	600.508	1.57029	7.15725e-41	6.28429e-39	ULK1	12	131894651	131923167	+	7608	protein_coding	unc-51 like autophagy activating kinase 1 [Source:HGNC Symbol;Acc:HGNC:12558]	-
ENSG00000108669	1137.47	1150.08	962.575	1092.86	325.562	210.245	305.555	302.538	1085.75	285.975	1.92123	7.75634e-41	6.7836e-39	CYTH1	17	78674048	78782297	-	7754	protein_coding	cytohesin 1 [Source:HGNC Symbol;Acc:HGNC:9501]	-
ENSG00000113161	2990.15	3123.34	1986.97	2599.65	675.514	423.134	605.388	587.886	2675.03	572.981	2.22152	8.43922e-41	7.35201e-39	HMGCR	5	75336329	75362104	+	6215	protein_coding	3-hydroxy-3-methylglutaryl-CoA reductase [Source:HGNC Symbol;Acc:HGNC:5006]	-
ENSG00000198804	161880	183534	158961	171628	448283	595629	459202	471163	169001	493569	-1.54622	8.83483e-41	7.64317e-39	MT-CO1	MT	5904	7445	+	1542	protein_coding	mitochondrially encoded cytochrome c oxidase I [Source:HGNC Symbol;Acc:HGNC:7419]	-
ENSG00000131941	803.426	826.59	445.562	694.082	79.5347	38.3465	91.5521	97.408	692.415	76.7103	3.1671	8.84198e-41	7.64317e-39	RHPN2	19	32978593	33064888	-	4804	protein_coding	rhophilin Rho GTPase binding protein 2 [Source:HGNC Symbol;Acc:HGNC:19974]	-
ENSG00000243156	1533.19	1645.52	1167.29	1505.11	455.999	413.878	453.183	428.595	1462.78	437.914	1.73921	8.98429e-41	7.7362e-39	MICAL3	22	17787649	18024559	-	22354	protein_coding	microtubule associated monooxygenase, calponin and LIM domain containing 3 [Source:HGNC Symbol;Acc:HGNC:24694]	-
ENSG00000156482	4196.15	4172.96	3771.62	4540.56	10054.2	11527.8	9964.3	10844.4	4170.32	10597.7	-1.34548	9.21678e-41	7.90587e-39	RPL30	8	98024851	98046469	-	4027	protein_coding	ribosomal protein L30 [Source:HGNC Symbol;Acc:HGNC:10333]	-
ENSG00000136688	38.5439	46.8202	25.6901	53.0027	255.571	314.706	257.49	281.91	41.0142	277.419	-2.75939	9.67632e-41	8.26825e-39	IL36G	2	112973203	112985665	+	1380	protein_coding	interleukin 36 gamma [Source:HGNC Symbol;Acc:HGNC:15741]	-
ENSG00000139793	1381.59	1621.68	1157.66	1293.94	442.213	394.044	363.92	380.464	1363.72	395.16	1.78637	1.03418e-40	8.80314e-39	MBNL2	13	97221434	97394120	+	4908	protein_coding	muscleblind like splicing regulator 2 [Source:HGNC Symbol;Acc:HGNC:16746]	-
ENSG00000184009	21934.1	20065.5	20870.8	22296.5	50841.7	71032.3	65217.1	60884.6	21291.7	61994	-1.54182	1.50735e-40	1.27821e-38	ACTG1	17	81509971	81523847	-	2993	protein_coding	actin gamma 1 [Source:HGNC Symbol;Acc:HGNC:144]	-
ENSG00000177283	3.42613	11.0666	22.4788	12.6197	165.432	298.838	243.757	209.714	12.3978	229.435	-4.19807	1.76875e-40	1.49419e-38	FZD8	10	35638249	35642278	-	4030	protein_coding	frizzled class receptor 8 [Source:HGNC Symbol;Acc:HGNC:4046]	-
ENSG00000106571	449.679	509.915	451.182	492.168	83.7765	52.8918	93.8409	115.744	475.736	86.5632	2.45147	1.80652e-40	1.52034e-38	GLI3	7	41960950	42237870	-	10950	protein_coding	GLI family zinc finger 3 [Source:HGNC Symbol;Acc:HGNC:4319]	zf-C2H2
ENSG00000148154	2173.88	2532.55	1485.21	2051.12	412.52	190.41	359.342	305.976	2060.69	317.062	2.69758	1.91432e-40	1.60501e-38	UGCG	9	111896766	111935369	+	4615	protein_coding	UDP-glucose ceramide glucosyltransferase [Source:HGNC Symbol;Acc:HGNC:12524]	-
ENSG00000173457	2913.06	2243.11	2643.67	2394.37	8990.6	12141.3	7900.95	8858.4	2548.56	9472.81	-1.894	1.92945e-40	1.61163e-38	PPP1R14B	11	64244480	64246941	-	1655	protein_coding	protein phosphatase 1 regulatory inhibitor subunit 14B [Source:HGNC Symbol;Acc:HGNC:9057]	-
ENSG00000080845	2751.18	2736.86	2471.87	2638.35	1115.61	1094.86	1086.04	970.642	2649.56	1066.79	1.31245	2.65098e-40	2.20605e-38	DLGAP4	20	36306336	36528637	+	8789	protein_coding	DLG associated protein 4 [Source:HGNC Symbol;Acc:HGNC:24476]	-
ENSG00000235552	598.715	601.002	561.97	599.855	1737.04	2675	1896.27	2125.79	590.386	2108.52	-1.83598	2.7812e-40	2.30581e-38	RPL6P27	18	6462144	6463015	-	872	transcribed_processed_pseudogene	ribosomal protein L6 pseudogene 27 [Source:HGNC Symbol;Acc:HGNC:36133]	-
ENSG00000186352	16.2741	23.8358	16.8591	15.1436	144.223	235.368	177.382	186.794	18.0281	185.942	-3.3645	3.08118e-40	2.54506e-38	ANKRD37	4	185396021	185400628	+	2580	protein_coding	ankyrin repeat domain 37 [Source:HGNC Symbol;Acc:HGNC:29593]	-
ENSG00000147050	542.184	571.207	426.295	487.961	128.316	95.2052	115.585	128.349	506.912	116.864	2.11228	3.14777e-40	2.59046e-38	KDM6A	X	44873177	45112602	+	7139	protein_coding	lysine demethylase 6A [Source:HGNC Symbol;Acc:HGNC:12637]	-
ENSG00000177000	872.806	1083.68	788.364	1047.43	202.548	122.973	225.447	137.517	948.07	172.121	2.45769	3.28978e-40	2.69737e-38	MTHFR	1	11785723	11806920	-	11978	protein_coding	methylenetetrahydrofolate reductase [Source:HGNC Symbol;Acc:HGNC:7436]	-
ENSG00000266028	1289.94	1448.02	1143.21	1337.69	441.152	474.704	400.54	403.384	1304.71	429.945	1.60227	3.33047e-40	2.72074e-38	SRGAP2	1	206203345	206464443	+	15675	protein_coding	SLIT-ROBO Rho GTPase activating protein 2 [Source:HGNC Symbol;Acc:HGNC:19751]	-
ENSG00000051108	1364.45	1178.17	1208.24	1183.73	409.338	479.993	405.118	433.179	1233.65	431.907	1.51556	3.63277e-40	2.95687e-38	HERPUD1	16	56932048	56944863	+	5155	protein_coding	homocysteine inducible ER protein with ubiquitin like domain 1 [Source:HGNC Symbol;Acc:HGNC:13744]	-
ENSG00000070444	1128.05	1247.97	1068.55	1272.06	354.194	355.697	439.45	347.231	1179.16	374.143	1.65577	3.89362e-40	3.15765e-38	MNT	17	2384060	2401118	-	8728	protein_coding	MAX network transcriptional repressor [Source:HGNC Symbol;Acc:HGNC:7188]	bHLH
ENSG00000137193	4733.19	3405.96	1877.78	3658.87	527.05	567.264	529.858	522.565	3418.95	536.684	2.67154	4.44536e-40	3.59205e-38	PIM1	6	37170203	37175426	+	2977	protein_coding	Pim-1 proto-oncogene, serine/threonine kinase [Source:HGNC Symbol;Acc:HGNC:8986]	-
ENSG00000006704	1043.26	1219.88	1336.69	1224.95	326.622	403.3	405.118	380.464	1206.19	378.876	1.67212	5.25225e-40	4.22873e-38	GTF2IRD1	7	74453790	74602604	+	6498	protein_coding	GTF2I repeat domain containing 1 [Source:HGNC Symbol;Acc:HGNC:4661]	GTF2I
ENSG00000120549	973.02	1080.27	880.688	942.269	322.38	317.351	347.898	296.808	969.062	321.109	1.5932	5.40261e-40	4.33413e-38	KIAA1217	10	23694746	24547848	+	10807	protein_coding	KIAA1217 [Source:HGNC Symbol;Acc:HGNC:25428]	-
ENSG00000165916	2228.69	1955.38	2255.11	2140.3	5075.37	6583.7	5863.91	6325.79	2144.87	5962.19	-1.47476	5.81877e-40	4.65126e-38	PSMC3	11	47418769	47426473	-	2276	protein_coding	proteasome 26S subunit, ATPase 3 [Source:HGNC Symbol;Acc:HGNC:9549]	-
ENSG00000198258	1405.57	1150.93	1077.38	1297.3	3401.96	4214.15	3507.59	3714.11	1232.79	3709.45	-1.58919	7.29607e-40	5.81132e-38	UBL5	19	9827892	9830115	+	1931	protein_coding	ubiquitin like 5 [Source:HGNC Symbol;Acc:HGNC:13736]	-
ENSG00000057657	75.3748	56.1843	53.7886	62.2571	343.59	522.306	395.963	297.954	61.9012	389.953	-2.65433	9.8045e-40	7.78149e-38	PRDM1	6	106086320	106109939	+	6392	protein_coding	PR/SET domain 1 [Source:HGNC Symbol;Acc:HGNC:9346]	zf-C2H2
ENSG00000249673	113.919	86.8303	113.197	115.26	424.185	387.432	506.97	459.537	107.301	444.531	-2.05094	1.11206e-39	8.79476e-38	NOP14-AS1	4	2934899	2961738	+	7195	antisense	NOP14 antisense RNA 1 [Source:HGNC Symbol;Acc:HGNC:20205]	-
ENSG00000182606	1275.38	1367.15	1211.45	1272.06	459.18	498.505	505.825	430.887	1281.51	473.599	1.43675	1.34109e-39	1.05686e-37	TRAK1	3	42013802	42225889	+	10992	protein_coding	trafficking kinesin protein 1 [Source:HGNC Symbol;Acc:HGNC:29947]	-
ENSG00000078900	677.516	681.022	806.026	800.929	208.911	171.898	223.158	231.487	741.373	208.864	1.82527	1.46431e-39	1.14989e-37	TP73	1	3652520	3736201	+	6763	protein_coding	tumor protein p73 [Source:HGNC Symbol;Acc:HGNC:12003]	P53
ENSG00000130726	4476.23	3859.69	4861.85	4187.21	11100.9	15362.4	15498.6	13956.9	4346.25	13979.7	-1.68541	1.49581e-39	1.17051e-37	TRIM28	19	58544091	58550722	+	4034	protein_coding	tripartite motif containing 28 [Source:HGNC Symbol;Acc:HGNC:16384]	-
ENSG00000106780	440.257	616.325	501.759	571.251	136.8	88.5937	105.285	119.182	532.398	112.465	2.23753	1.67775e-39	1.30829e-37	MEGF9	9	120600813	120714470	-	6298	protein_coding	multiple EGF like domains 9 [Source:HGNC Symbol;Acc:HGNC:3234]	-
ENSG00000185361	561.885	504.807	570.801	489.644	134.679	154.708	96.1297	127.203	531.784	128.18	2.05596	1.91972e-39	1.49176e-37	TNFAIP8L1	19	4639518	4655568	+	6667	protein_coding	TNF alpha induced protein 8 like 1 [Source:HGNC Symbol;Acc:HGNC:28279]	-
ENSG00000214357	312.634	290.285	236.028	243.98	48.7813	48.9249	38.9096	32.0874	270.732	42.1758	2.68404	2.80376e-39	2.17116e-37	NEURL1B	5	172641266	172691540	+	6424	protein_coding	neuralized E3 ubiquitin protein ligase 1B [Source:HGNC Symbol;Acc:HGNC:35422]	-
ENSG00000240342	7790.15	7097.95	7808.18	8513.24	19203.9	24157	19485.7	21835.4	7802.38	21170.5	-1.44002	3.13814e-39	2.42169e-37	RPS2P5	12	118246084	118246962	+	879	processed_pseudogene	ribosomal protein S2 pseudogene 5 [Source:HGNC Symbol;Acc:HGNC:31386]	-
ENSG00000142677	400.857	314.121	272.154	340.731	47.7208	59.5032	66.3753	61.8828	331.966	58.8705	2.49764	3.58143e-39	2.75424e-37	IL22RA1	1	24119771	24143121	-	2798	protein_coding	interleukin 22 receptor subunit alpha 1 [Source:HGNC Symbol;Acc:HGNC:13700]	-
ENSG00000188293	85.6531	28.0921	41.7464	38.7004	390.25	650.569	441.739	575.28	48.548	514.46	-3.40607	4.07304e-39	3.12154e-37	IGFL1	19	46229752	46231243	+	769	protein_coding	IGF like family member 1 [Source:HGNC Symbol;Acc:HGNC:24093]	-
ENSG00000166046	292.934	244.316	206.323	228.837	33.9348	40.9911	34.332	24.0655	243.103	33.3309	2.87254	5.88524e-39	4.49496e-37	TCP11L2	12	106301929	106347015	+	6558	protein_coding	t-complex 11 like 2 [Source:HGNC Symbol;Acc:HGNC:28627]	-
ENSG00000136848	3552.89	4421.53	4433.95	5040.3	1154.84	813.211	1235.95	1247.97	4362.17	1112.99	1.96988	5.98314e-39	4.55413e-37	DAB2IP	9	121567057	121785530	+	9127	protein_coding	DAB2 interacting protein [Source:HGNC Symbol;Acc:HGNC:17294]	-
ENSG00000165799	5.13919	3.40511	8.83096	2.52394	116.651	181.154	130.462	147.831	4.9748	144.024	-4.84132	6.16335e-39	4.67534e-37	RNASE7	14	21042226	21044234	+	1499	protein_coding	ribonuclease A family member 7 [Source:HGNC Symbol;Acc:HGNC:19278]	-
ENSG00000172115	2941.33	3145.47	2429.32	2987.5	9135.88	8994.24	7258.94	8174.25	2875.9	8390.83	-1.54485	8.3264e-39	6.29476e-37	CYCS	7	25120091	25125361	-	4457	protein_coding	cytochrome c, somatic [Source:HGNC Symbol;Acc:HGNC:19986]	-
ENSG00000150779	292.077	260.491	242.45	273.426	725.356	784.12	780.482	836.563	267.111	781.63	-1.54925	1.09563e-38	8.25494e-37	TIMM8B	11	112084800	112086798	-	1166	protein_coding	translocase of inner mitochondrial membrane 8 homolog B [Source:HGNC Symbol;Acc:HGNC:11818]	-
ENSG00000135945	771.735	849.574	630.21	701.654	202.548	133.552	201.415	167.313	738.293	176.207	2.06259	1.22767e-38	9.21868e-37	REV1	2	99400475	99490035	-	7769	protein_coding	REV1, DNA directed polymerase [Source:HGNC Symbol;Acc:HGNC:14060]	-
ENSG00000176092	1074.95	1097.3	950.533	1150.07	316.018	383.465	381.086	360.983	1068.21	360.388	1.56888	1.40298e-38	1.04998e-36	CRYBG2	1	26321698	26360080	-	6895	protein_coding	crystallin beta-gamma domain containing 2 [Source:HGNC Symbol;Acc:HGNC:17295]	-
ENSG00000171988	506.21	674.211	470.45	505.629	134.679	91.2383	124.74	107.722	539.125	114.595	2.22906	1.41696e-38	1.05689e-36	JMJD1C	10	63167221	63521850	-	11066	protein_coding	jumonji domain containing 1C [Source:HGNC Symbol;Acc:HGNC:12313]	-
ENSG00000166833	616.703	788.282	621.379	660.43	133.618	200.989	163.649	128.349	671.698	156.651	2.10518	1.45465e-38	1.08139e-36	NAV2	11	19350724	20121598	+	14673	protein_coding	neuron navigator 2 [Source:HGNC Symbol;Acc:HGNC:15997]	-
ENSG00000249992	178.159	168.553	171	217.059	563.105	753.708	694.652	661.229	183.692	668.173	-1.86201	1.73418e-38	1.28491e-36	TMEM158	3	45224466	45226278	-	1813	protein_coding	transmembrane protein 158 (gene/pseudogene) [Source:HGNC Symbol;Acc:HGNC:30293]	-
ENSG00000179833	1716.49	1817.48	1020.38	1617	266.176	137.519	275.801	265.867	1542.84	236.34	2.70365	2.34077e-38	1.72505e-36	SERTAD2	2	64631621	64751005	-	6274	protein_coding	SERTA domain containing 2 [Source:HGNC Symbol;Acc:HGNC:30784]	-
ENSG00000171222	533.619	383.926	430.309	497.215	1395.57	2016.5	1750.93	1620.41	461.267	1695.85	-1.87794	2.34369e-38	1.72505e-36	SCAND1	20	35953617	35959472	-	1996	protein_coding	SCAN domain containing 1 [Source:HGNC Symbol;Acc:HGNC:10566]	-
ENSG00000114767	278.373	249.424	289.013	256.6	738.082	840.979	975.03	963.767	268.353	879.464	-1.7121	2.43879e-38	1.78914e-36	RRP9	3	51933430	51941941	-	1578	protein_coding	ribosomal RNA processing 9, U3 small nucleolar RNA binding protein [Source:HGNC Symbol;Acc:HGNC:16829]	-
ENSG00000150459	1409.85	1474.41	1291.73	1521.09	3573.76	3697.13	3251.24	3415.01	1424.27	3484.29	-1.29064	2.50848e-38	1.83423e-36	SAP18	13	21140514	21149084	+	3396	protein_coding	Sin3A associated protein 18 [Source:HGNC Symbol;Acc:HGNC:10530]	-
ENSG00000052344	3499.79	2259.29	1745.32	2589.56	481.45	376.854	536.724	516.836	2523.49	477.966	2.39953	2.94669e-38	2.14762e-36	PRSS8	16	31131433	31135762	-	3010	protein_coding	serine protease 8 [Source:HGNC Symbol;Acc:HGNC:9491]	-
ENSG00000116514	2854.82	2571.71	1916.32	2563.48	441.152	288.26	600.811	516.836	2476.58	461.765	2.42168	3.75608e-38	2.7286e-36	RNF19B	1	32936445	32964685	-	2610	protein_coding	ring finger protein 19B [Source:HGNC Symbol;Acc:HGNC:26886]	-
ENSG00000169429	218.416	251.127	87.5068	249.028	4063.69	5090.83	3592.28	4040.71	201.519	4196.88	-4.3807	4.37596e-38	3.16859e-36	CXCL8	4	73740506	73743716	+	2274	protein_coding	C-X-C motif chemokine ligand 8 [Source:HGNC Symbol;Acc:HGNC:6025]	-
ENSG00000130164	11224	11261.5	7015.8	11755.7	1889.74	2052.2	2870.16	2235.8	10314.2	2261.98	2.18895	4.6551e-38	3.35981e-36	LDLR	19	11089362	11133816	+	7718	protein_coding	low density lipoprotein receptor [Source:HGNC Symbol;Acc:HGNC:6547]	-
ENSG00000100297	1009.85	855.533	1070.96	1014.62	2444.37	2678.97	2983.45	2960.06	987.74	2766.71	-1.4858	4.75859e-38	3.42342e-36	MCM5	22	35400063	35425430	+	7338	protein_coding	minichromosome maintenance complex component 5 [Source:HGNC Symbol;Acc:HGNC:6948]	-
ENSG00000140443	2256.1	2592.99	2169.21	2375.02	963.96	753.708	835.413	819.373	2348.33	843.114	1.47679	4.84228e-38	3.47243e-36	IGF1R	15	98648539	98964530	+	13941	protein_coding	insulin like growth factor 1 receptor [Source:HGNC Symbol;Acc:HGNC:5465]	-
ENSG00000173141	296.36	230.696	270.549	264.172	782.621	896.515	759.882	907.614	265.444	836.658	-1.65568	4.88515e-38	3.49194e-36	MRPL57	13	21176645	21179084	+	2246	protein_coding	mitochondrial ribosomal protein L57 [Source:HGNC Symbol;Acc:HGNC:14514]	-
ENSG00000198668	2822.27	3024.59	3017.78	2976.56	6339.44	6169.82	6103.09	6262.76	2960.3	6218.78	-1.07089	6.39405e-38	4.55591e-36	CALM1	14	90396502	90408261	+	7705	protein_coding	calmodulin 1 [Source:HGNC Symbol;Acc:HGNC:1442]	-
ENSG00000121858	701.499	1099	978.631	1089.5	262.995	199.666	196.837	224.611	967.157	221.027	2.12769	7.58483e-38	5.38716e-36	TNFSF10	3	172505508	172523507	-	3473	protein_coding	TNF superfamily member 10 [Source:HGNC Symbol;Acc:HGNC:11925]	-
ENSG00000121210	250.107	243.465	252.887	255.759	49.8417	51.5695	56.0757	50.423	250.554	51.9775	2.26962	7.84403e-38	5.55357e-36	TMEM131L	4	153466346	153636711	+	6393	protein_coding	transmembrane 131 like [Source:HGNC Symbol;Acc:HGNC:29146]	-
ENSG00000182584	6.85225	4.25638	16.0563	13.461	161.19	141.485	177.382	131.787	10.1565	152.961	-3.90417	1.05664e-37	7.45731e-36	ACTL10	20	33666498	33668525	+	2028	protein_coding	actin like 10 [Source:HGNC Symbol;Acc:HGNC:16127]	-
ENSG00000244094	13.7045	7.66149	19.2676	3.36525	158.009	249.914	154.494	210.86	10.9997	193.319	-4.12651	1.12031e-37	7.88177e-36	SPRR2F	1	153112114	153113515	-	681	protein_coding	small proline rich protein 2F [Source:HGNC Symbol;Acc:HGNC:11266]	-
ENSG00000143190	644.968	835.954	545.914	679.78	181.339	157.353	168.227	171.897	676.654	169.704	1.99366	1.24341e-37	8.72032e-36	POU2F1	1	167220829	167427345	+	16078	protein_coding	POU class 2 homeobox 1 [Source:HGNC Symbol;Acc:HGNC:9212]	Pou
ENSG00000178974	625.268	787.431	722.533	746.244	173.916	68.7593	123.595	124.911	720.369	122.795	2.54472	1.26212e-37	8.82374e-36	FBXO34	14	55271303	55361918	+	4133	protein_coding	F-box protein 34 [Source:HGNC Symbol;Acc:HGNC:20201]	-
ENSG00000184281	413.705	314.972	507.379	380.273	1337.24	1531.22	1861.94	1707.51	404.082	1609.48	-1.99338	1.36493e-37	9.51269e-36	TSSC4	11	2400488	2403878	+	2659	protein_coding	tumor suppressing subtransferable candidate 4 [Source:HGNC Symbol;Acc:HGNC:12386]	-
ENSG00000143862	1658.24	1587.63	1310.19	1814.71	364.799	304.128	481.793	448.077	1592.7	399.699	1.99314	1.50609e-37	1.04638e-35	ARL8A	1	202133404	202144743	-	1975	protein_coding	ADP ribosylation factor like GTPase 8A [Source:HGNC Symbol;Acc:HGNC:25192]	-
ENSG00000163191	11095.5	9272.11	8688.87	10177.4	26593.2	35364.8	26566.1	30418.8	9808.46	29735.7	-1.60008	1.85839e-37	1.28714e-35	S100A11	1	152032506	152047907	-	680	protein_coding	S100 calcium binding protein A11 [Source:HGNC Symbol;Acc:HGNC:10488]	-
ENSG00000107815	128.48	155.784	225.591	150.595	681.877	807.922	1112.36	872.088	165.112	868.561	-2.394	2.39312e-37	1.65237e-35	TWNK	10	100987367	100994401	+	4133	protein_coding	twinkle mtDNA helicase [Source:HGNC Symbol;Acc:HGNC:1160]	-
ENSG00000181026	184.154	174.512	188.662	154.801	629.915	600.322	933.831	838.855	175.532	750.731	-2.09682	2.69346e-37	1.854e-35	AEN	15	88621296	88632282	+	6018	protein_coding	apoptosis enhancing nuclease [Source:HGNC Symbol;Acc:HGNC:25722]	-
ENSG00000169118	456.531	565.248	512.196	556.949	147.404	121.651	128.173	162.729	522.731	139.989	1.89797	2.77057e-37	1.90121e-35	CSNK1G1	15	64165517	64356259	-	9712	protein_coding	casein kinase 1 gamma 1 [Source:HGNC Symbol;Acc:HGNC:2454]	-
ENSG00000160007	2919.92	3297	2902.18	3249.15	1184.54	942.796	1240.53	1107.01	3092.06	1118.72	1.46589	3.04354e-37	2.08212e-35	ARHGAP35	19	46918676	47005077	+	11245	protein_coding	Rho GTPase activating protein 35 [Source:HGNC Symbol;Acc:HGNC:4591]	-
ENSG00000186260	435.118	477.566	392.576	376.066	100.744	79.3376	117.873	97.408	420.332	98.8407	2.08397	3.37036e-37	2.29864e-35	MRTFB	16	14071321	14266773	+	16578	protein_coding	myocardin related transcription factor B [Source:HGNC Symbol;Acc:HGNC:29819]	-
ENSG00000084207	11815.9	9825.44	10776.2	11963.5	27708.8	41193.4	34335.5	36465	11095.2	34925.7	-1.65432	3.48132e-37	2.36709e-35	GSTP1	11	67583595	67586656	+	1911	protein_coding	glutathione S-transferase pi 1 [Source:HGNC Symbol;Acc:HGNC:4638]	-
ENSG00000167553	2531.91	2642.36	3154.26	2674.53	6765.75	9508.62	9257.06	8675.05	2750.77	8551.62	-1.6362	3.77262e-37	2.55735e-35	TUBA1C	12	49188736	49274603	+	4631	protein_coding	tubulin alpha 1c [Source:HGNC Symbol;Acc:HGNC:20768]	-
ENSG00000184678	453.962	475.013	356.45	392.893	1333	1752.04	1282.87	1401.53	419.579	1442.36	-1.78118	3.97631e-37	2.68726e-35	HIST2H2BE	1	149884459	149886652	-	2194	protein_coding	histone cluster 2 H2B family member e [Source:HGNC Symbol;Acc:HGNC:4760]	-
ENSG00000070404	1030.41	955.133	1152.84	1241.78	3319.25	5644.87	4538.7	3904.34	1095.04	4351.79	-1.99031	4.45807e-37	3.00374e-35	FSTL3	19	676365	683399	+	3067	protein_coding	follistatin like 3 [Source:HGNC Symbol;Acc:HGNC:3973]	-
ENSG00000105372	10164.5	8708.56	9788.72	10373.4	25890.1	36734.7	26716	29819.5	9758.78	29790.1	-1.61002	4.60636e-37	3.09431e-35	RPS19	19	41859918	41872926	+	3799	protein_coding	ribosomal protein S19 [Source:HGNC Symbol;Acc:HGNC:10402]	-
ENSG00000174917	537.902	465.649	486.506	524.137	1257.71	1728.24	1516.33	1519.57	503.548	1505.46	-1.57941	4.65244e-37	3.11587e-35	C19orf70	19	5678421	5680896	-	1854	protein_coding	chromosome 19 open reading frame 70 [Source:HGNC Symbol;Acc:HGNC:33702]	-
ENSG00000143153	1812.42	1963.9	1390.48	1818.92	522.808	425.779	560.757	546.631	1746.43	513.994	1.76333	4.75752e-37	3.17671e-35	ATP1B1	1	169105697	169132722	+	2962	protein_coding	ATPase Na+/K+ transporting subunit beta 1 [Source:HGNC Symbol;Acc:HGNC:804]	-
ENSG00000100664	782.013	972.158	1635.33	890.108	5748.77	4971.83	5594.98	5436.51	1069.9	5438.02	-2.34538	6.40888e-37	4.26659e-35	EIF5	14	103333544	103345025	+	8505	protein_coding	eukaryotic translation initiation factor 5 [Source:HGNC Symbol;Acc:HGNC:3299]	-
ENSG00000269893	445.396	386.48	439.943	417.291	1178.17	1433.37	1084.89	1265.16	422.277	1240.4	-1.55378	7.89799e-37	5.24229e-35	SNHG8	4	118278709	118279823	+	923	lincRNA	small nucleolar RNA host gene 8 [Source:HGNC Symbol;Acc:HGNC:33098]	-
ENSG00000099622	1610.28	1839.61	2160.37	1990.54	5019.17	5993.96	5195.58	5147.73	1900.2	5339.11	-1.4902	8.42866e-37	5.57792e-35	CIRBP	19	1259384	1274880	+	6368	protein_coding	cold inducible RNA binding protein [Source:HGNC Symbol;Acc:HGNC:1982]	-
ENSG00000143816	1429.55	1766.4	1124.74	1933.34	302.232	275.037	418.851	308.268	1563.51	326.097	2.26059	8.76251e-37	5.7817e-35	WNT9A	1	227918656	227947898	-	3971	protein_coding	Wnt family member 9A [Source:HGNC Symbol;Acc:HGNC:12778]	-
ENSG00000135404	3923.77	3253.58	3124.56	3675.69	8494.3	10270.3	8927.47	9684.65	3494.4	9344.17	-1.41899	1.02263e-36	6.72763e-35	CD63	12	55725323	55729707	-	2633	protein_coding	CD63 molecule [Source:HGNC Symbol;Acc:HGNC:1692]	-
ENSG00000204520	2064.24	1654.88	1197	1712.91	424.185	362.309	400.54	457.245	1657.26	411.07	2.0104	1.0352e-36	6.79032e-35	MICA	6	31399784	31415315	+	2386	protein_coding	MHC class I polypeptide-related sequence A [Source:HGNC Symbol;Acc:HGNC:7090]	-
ENSG00000067182	4919.06	5029.34	4048.6	5206.04	992.593	505.116	1018.52	1117.33	4800.76	908.388	2.40089	1.0785e-36	7.0536e-35	TNFRSF1A	12	6328757	6342114	-	4005	protein_coding	TNF receptor superfamily member 1A [Source:HGNC Symbol;Acc:HGNC:11916]	-
ENSG00000179431	78.8009	106.41	149.324	123.673	555.682	517.017	812.525	670.396	114.552	638.905	-2.47861	1.10456e-36	7.20292e-35	FJX1	11	35618419	35620868	+	2450	protein_coding	four jointed box 1 [Source:HGNC Symbol;Acc:HGNC:17166]	-
ENSG00000146067	1211.14	1117.73	1111.1	1140.82	390.25	428.423	455.472	468.705	1145.19	435.712	1.3945	1.18908e-36	7.73145e-35	FAM193B	5	177519788	177554541	-	5804	protein_coding	family with sequence similarity 193 member B [Source:HGNC Symbol;Acc:HGNC:25524]	-
ENSG00000158636	635.546	759.339	610.942	598.173	214.213	167.931	180.815	193.67	651	189.158	1.78022	1.25085e-36	8.10946e-35	EMSY	11	76444923	76553025	+	11783	protein_coding	EMSY, BRCA2 interacting transcriptional repressor [Source:HGNC Symbol;Acc:HGNC:18071]	-
ENSG00000089902	2129.34	2862.84	1851.29	2321.18	742.324	624.123	608.821	571.842	2291.16	636.778	1.84668	1.30347e-36	8.4261e-35	RCOR1	14	102592661	102730576	+	6202	protein_coding	REST corepressor 1 [Source:HGNC Symbol;Acc:HGNC:17441]	MYB
ENSG00000137504	1152.03	1254.78	1001.91	1145.87	300.111	159.998	304.411	236.071	1138.65	250.148	2.18265	1.47814e-36	9.52759e-35	CREBZF	11	85659708	85682908	-	5587	protein_coding	CREB/ATF bZIP transcription factor [Source:HGNC Symbol;Acc:HGNC:24905]	TF_bZIP
ENSG00000129235	1577.73	1433.55	1342.31	1691.04	3861.14	4509.02	3727.31	4161.04	1511.16	4064.63	-1.42738	1.49856e-36	9.6314e-35	TXNDC17	17	6640758	6644541	+	3784	protein_coding	thioredoxin domain containing 17 [Source:HGNC Symbol;Acc:HGNC:28218]	-
ENSG00000251562	8005.14	11423.3	7234.17	9901.4	2574.8	1617.17	2086.24	1536.76	9141	1953.74	2.22575	1.85511e-36	1.18887e-34	MALAT1	11	65497688	65506516	+	8829	lincRNA	metastasis associated lung adenocarcinoma transcript 1 [Source:HGNC Symbol;Acc:HGNC:29665]	-
ENSG00000196976	303.212	233.25	306.675	266.696	813.374	1100.15	907.51	925.949	277.458	936.746	-1.7542	2.82025e-36	1.80221e-34	LAGE3	X	154477769	154479257	-	949	protein_coding	L antigen family member 3 [Source:HGNC Symbol;Acc:HGNC:26058]	-
ENSG00000163993	69.379	70.656	71.4505	67.305	294.808	435.035	305.555	299.1	69.6976	333.625	-2.25635	2.84257e-36	1.81129e-34	S100P	4	6693069	6697170	+	1280	protein_coding	S100 calcium binding protein P [Source:HGNC Symbol;Acc:HGNC:10504]	-
ENSG00000114942	3204.28	2994.79	2993.7	2831.02	7300.22	9457.05	7209.73	8248.74	3005.95	8053.93	-1.42174	3.99787e-36	2.54018e-34	EEF1B2	2	206159585	206162928	+	1915	protein_coding	eukaryotic translation elongation factor 1 beta 2 [Source:HGNC Symbol;Acc:HGNC:3208]	-
ENSG00000186468	2789.72	2843.27	2830.73	3213.81	6412.61	6619.4	6393.77	7008.79	2919.38	6608.65	-1.17868	4.07258e-36	2.5803e-34	RPS23	5	82273358	82278577	-	4204	protein_coding	ribosomal protein S23 [Source:HGNC Symbol;Acc:HGNC:10410]	-
ENSG00000125445	634.69	549.925	536.28	536.757	1398.75	1397.66	1381.29	1429.03	564.413	1401.68	-1.31256	4.23356e-36	2.6747e-34	MRPS7	17	75261674	75266373	+	3324	protein_coding	mitochondrial ribosomal protein S7 [Source:HGNC Symbol;Acc:HGNC:14499]	-
ENSG00000111266	268.951	298.798	262.52	244.822	53.0231	54.2141	37.7652	61.8828	268.773	51.7213	2.37842	4.39696e-36	2.77008e-34	DUSP16	12	12474210	12562383	-	5724	protein_coding	dual specificity phosphatase 16 [Source:HGNC Symbol;Acc:HGNC:17909]	-
ENSG00000040608	491.649	357.536	354.844	426.545	94.3811	68.7593	84.6857	99.7	407.644	86.8815	2.22501	4.55372e-36	2.86076e-34	RTN4R	22	20241415	20283246	-	3339	protein_coding	reticulon 4 receptor [Source:HGNC Symbol;Acc:HGNC:18601]	-
ENSG00000158710	10552.5	10166.8	9832.88	11223.1	23698.1	30756.6	25243.2	27051.9	10443.8	26687.5	-1.35348	4.61811e-36	2.89307e-34	TAGLN2	1	159918107	159925732	-	2487	protein_coding	transgelin 2 [Source:HGNC Symbol;Acc:HGNC:11554]	-
ENSG00000120071	517.345	586.53	527.449	539.281	142.102	116.362	184.249	140.955	542.651	145.917	1.89166	7.16396e-36	4.47537e-34	KANSL1	17	46029916	46225389	-	23829	protein_coding	KAT8 regulatory NSL complex subunit 1 [Source:HGNC Symbol;Acc:HGNC:24565]	-
ENSG00000092871	598.715	687.832	466.435	606.586	166.493	142.808	159.072	132.933	589.892	150.326	1.97046	7.71857e-36	4.80837e-34	RFFL	17	35005990	35089319	-	8512	protein_coding	ring finger and FYVE like domain containing E3 ubiquitin protein ligase [Source:HGNC Symbol;Acc:HGNC:24821]	-
ENSG00000143590	711.778	580.571	518.618	634.349	88.0184	29.0905	80.1081	108.868	611.329	76.5212	2.9889	7.91133e-36	4.91472e-34	EFNA3	1	155078872	155087538	+	1909	protein_coding	ephrin A3 [Source:HGNC Symbol;Acc:HGNC:3223]	-
ENSG00000073605	583.298	634.201	517.013	565.362	170.734	198.344	147.628	151.269	574.968	166.994	1.78641	9.40059e-36	5.82366e-34	GSDMB	17	39904595	39919854	-	5905	protein_coding	gasdermin B [Source:HGNC Symbol;Acc:HGNC:23690]	-
ENSG00000113739	319.486	345.618	491.323	369.336	1267.25	1342.13	1607.88	1298.39	381.441	1378.91	-1.85335	9.77427e-36	6.03839e-34	STC2	5	173314713	173329503	-	6128	protein_coding	stanniocalcin 2 [Source:HGNC Symbol;Acc:HGNC:11374]	-
ENSG00000172757	14798.3	12233.7	12762.3	13201.9	31652.7	41262.2	34158.1	33975.9	13249.1	35262.2	-1.41221	1.08048e-35	6.65661e-34	CFL1	11	65823022	65862026	-	5863	protein_coding	cofilin 1 [Source:HGNC Symbol;Acc:HGNC:1874]	-
ENSG00000006025	1486.08	1516.12	1145.62	1521.09	396.613	499.827	406.262	467.559	1417.23	442.565	1.68037	1.12993e-35	6.94208e-34	OSBPL7	17	47807372	47821834	-	6572	protein_coding	oxysterol binding protein like 7 [Source:HGNC Symbol;Acc:HGNC:16387]	-
ENSG00000154370	2421.41	2220.98	1593.59	2384.28	568.408	466.77	666.042	584.448	2155.07	571.417	1.91417	1.44877e-35	8.87649e-34	TRIM11	1	228393673	228406840	-	8493	protein_coding	tripartite motif containing 11 [Source:HGNC Symbol;Acc:HGNC:16281]	-
ENSG00000172071	264.668	300.501	260.915	271.744	46.6603	13.2229	43.4872	42.4011	274.457	36.4429	2.89346	1.5281e-35	9.33691e-34	EIF2AK3	2	88556741	88627576	-	5434	protein_coding	eukaryotic translation initiation factor 2 alpha kinase 3 [Source:HGNC Symbol;Acc:HGNC:3255]	-
ENSG00000166483	1011.56	1224.14	915.209	1098.75	328.743	207.6	279.234	309.414	1062.42	281.248	1.9142	1.55388e-35	9.46845e-34	WEE1	11	9573681	9593457	+	9239	protein_coding	WEE1 G2 checkpoint kinase [Source:HGNC Symbol;Acc:HGNC:12761]	-
ENSG00000132680	2322.06	2033.7	1429.01	1792.84	516.445	552.719	561.901	488.186	1894.4	529.813	1.83836	1.56138e-35	9.48829e-34	KHDC4	1	155913043	155934400	-	5635	protein_coding	KH domain containing 4, pre-mRNA splicing factor [Source:HGNC Symbol;Acc:HGNC:29145]	-
ENSG00000160606	171.306	101.302	134.07	153.119	520.687	548.752	672.908	653.207	139.949	598.888	-2.09767	1.75328e-35	1.06255e-33	TLCD1	17	28724348	28727935	-	1311	protein_coding	TLC domain containing 1 [Source:HGNC Symbol;Acc:HGNC:25177]	-
ENSG00000261505	250.964	278.368	166.183	221.265	22.2697	17.1898	27.4656	35.5253	229.195	25.6126	3.15389	2.04952e-35	1.23871e-33	AL031714.1	16	1317891	1322845	-	4489	antisense	novel transcript, antisense to UBE2I	-
ENSG00000148660	1538.33	1553.58	1439.45	1457.99	605.524	680.981	604.244	611.952	1497.34	625.675	1.25985	2.2026e-35	1.32763e-33	CAMK2G	10	73812501	73874591	-	6780	protein_coding	calcium/calmodulin dependent protein kinase II gamma [Source:HGNC Symbol;Acc:HGNC:1463]	-
ENSG00000174851	1361.03	1216.47	1477.18	1355.35	3181.39	4429.69	4420.82	4209.17	1352.51	4060.27	-1.58566	2.24581e-35	1.34871e-33	YIF1A	11	66284580	66289170	-	2370	protein_coding	Yip1 interacting factor homolog A, membrane trafficking protein [Source:HGNC Symbol;Acc:HGNC:16688]	-
ENSG00000034510	11753.3	10413.7	10243.9	12141.8	27525.4	33521.5	26771	27867.9	11138.2	28921.4	-1.3766	2.254e-35	1.34871e-33	TMSB10	2	84905625	84906675	+	496	protein_coding	thymosin beta 10 [Source:HGNC Symbol;Acc:HGNC:11879]	-
ENSG00000109519	358.887	317.526	347.619	403.83	966.081	929.573	1003.64	955.745	356.965	963.76	-1.43309	2.25572e-35	1.34871e-33	GRPEL1	4	7058906	7068197	-	4177	protein_coding	GrpE like 1, mitochondrial [Source:HGNC Symbol;Acc:HGNC:19696]	-
ENSG00000185033	10644.1	10257.9	9326.3	11616	2471.94	1991.38	3638.05	2599.08	10461.1	2675.11	1.96714	2.53426e-35	1.5112e-33	SEMA4B	15	90160604	90229679	+	7006	protein_coding	semaphorin 4B [Source:HGNC Symbol;Acc:HGNC:10730]	-
ENSG00000196220	526.767	575.463	552.337	523.296	148.465	170.576	180.815	191.378	544.466	172.809	1.65677	2.55298e-35	1.51831e-33	SRGAP3	3	8980591	9363053	-	18924	protein_coding	SLIT-ROBO Rho GTPase activating protein 3 [Source:HGNC Symbol;Acc:HGNC:19744]	-
ENSG00000131149	1021.84	1161.99	1023.59	1060.89	393.431	429.746	423.428	427.449	1067.08	418.514	1.35095	2.88675e-35	1.71224e-33	GSE1	16	85169525	85676204	+	13387	protein_coding	Gse1 coiled-coil protein [Source:HGNC Symbol;Acc:HGNC:28979]	-
ENSG00000026950	416.274	421.382	449.576	386.162	130.437	96.5275	119.018	120.328	418.349	116.577	1.83871	2.89852e-35	1.71466e-33	BTN3A1	6	26402237	26415216	+	5547	protein_coding	butyrophilin subfamily 3 member A1 [Source:HGNC Symbol;Acc:HGNC:1138]	-
ENSG00000225855	215.846	220.481	131.662	184.247	19.0883	11.9006	19.4548	9.16782	188.059	14.9029	3.64506	3.01023e-35	1.77603e-33	RUSC1-AS1	1	155316863	155324176	-	3516	antisense	RUSC1 antisense RNA 1 [Source:HGNC Symbol;Acc:HGNC:26680]	-
ENSG00000175155	185.011	179.619	150.929	164.056	0	10.5784	5.72201	1.14598	169.904	4.36158	5.37415	3.1765e-35	1.86919e-33	YPEL2	17	59331689	59401729	+	8667	protein_coding	yippee like 2 [Source:HGNC Symbol;Acc:HGNC:18326]	-
ENSG00000196850	2747.75	3005.01	1610.45	2527.3	608.705	478.67	619.121	544.339	2472.63	562.709	2.13477	3.54748e-35	2.08199e-33	PPTC7	12	110533245	110583320	-	5687	protein_coding	PTC7 protein phosphatase homolog [Source:HGNC Symbol;Acc:HGNC:30695]	-
ENSG00000138802	653.533	707.411	586.055	598.173	182.399	117.684	188.826	176.48	636.293	166.348	1.93053	3.66061e-35	2.14275e-33	SEC24B	4	109433772	109540896	+	5219	protein_coding	SEC24 homolog B, COPII coat complex component [Source:HGNC Symbol;Acc:HGNC:10704]	-
ENSG00000185085	255.246	279.219	366.886	311.285	955.476	1085.6	1433.93	1133.37	303.159	1152.1	-1.9255	3.75957e-35	2.19492e-33	INTS5	11	62646848	62653302	-	3285	protein_coding	integrator complex subunit 5 [Source:HGNC Symbol;Acc:HGNC:29352]	-
ENSG00000125733	4149.89	3809.46	3229.72	4272.18	1412.54	1398.99	1550.66	1442.78	3865.32	1451.24	1.41316	4.06934e-35	2.36957e-33	TRIP10	19	6737925	6751526	+	3982	protein_coding	thyroid hormone receptor interactor 10 [Source:HGNC Symbol;Acc:HGNC:12304]	-
ENSG00000159388	6547.33	6776.16	4545.54	6611.03	1814.45	2115.67	1694.86	1668.54	6120.01	1823.38	1.74717	4.3953e-35	2.55271e-33	BTG2	1	203305491	203309602	+	2757	protein_coding	BTG anti-proliferation factor 2 [Source:HGNC Symbol;Acc:HGNC:1131]	-
ENSG00000273841	547.324	500.551	397.393	429.91	1293.76	1553.7	1364.13	1485.19	468.795	1424.19	-1.60315	4.75888e-35	2.75669e-33	TAF9	5	69364743	69370013	-	2577	protein_coding	TATA-box binding protein associated factor 9 [Source:HGNC Symbol;Acc:HGNC:11542]	-
ENSG00000136943	1017.56	969.604	899.153	975.922	2373.31	2303.44	2066.79	2283.93	965.56	2256.87	-1.22503	4.86015e-35	2.80806e-33	CTSV	9	97029679	97039643	-	4700	protein_coding	cathepsin V [Source:HGNC Symbol;Acc:HGNC:2538]	-
ENSG00000012232	3241.97	3437.46	2880.5	3225.59	1340.42	1170.23	1400.75	1250.26	3196.38	1290.42	1.30805	5.06696e-35	2.91998e-33	EXTL3	8	28600469	28755599	+	13220	protein_coding	exostosin like glycosyltransferase 3 [Source:HGNC Symbol;Acc:HGNC:3518]	-
ENSG00000174109	263.812	190.686	211.943	224.63	670.212	1034.03	942.987	823.957	222.768	867.798	-1.96107	5.38704e-35	3.09643e-33	C16orf91	16	1419744	1420800	-	1057	protein_coding	chromosome 16 open reading frame 91 [Source:HGNC Symbol;Acc:HGNC:27558]	-
ENSG00000073792	1114.35	1259.04	1180.14	1102.12	483.571	456.191	458.905	417.136	1163.91	453.951	1.35808	5.72472e-35	3.28207e-33	IGF2BP2	3	185643739	185825056	-	4735	protein_coding	insulin like growth factor 2 mRNA binding protein 2 [Source:HGNC Symbol;Acc:HGNC:28867]	-
ENSG00000168890	97.6446	91.9379	122.028	89.1791	359.497	384.788	497.815	417.136	100.197	414.809	-2.04846	6.08082e-35	3.47729e-33	TMEM150A	2	85598548	85603196	-	3094	protein_coding	transmembrane protein 150A [Source:HGNC Symbol;Acc:HGNC:24677]	-
ENSG00000006432	886.51	1155.18	796.392	919.554	246.027	185.121	290.678	223.465	939.41	236.323	1.98855	7.52172e-35	4.29027e-33	MAP3K9	14	70722526	70809534	-	12386	protein_coding	mitogen-activated protein kinase kinase kinase 9 [Source:HGNC Symbol;Acc:HGNC:6861]	-
ENSG00000214514	14.561	13.6204	15.2535	10.9371	102.865	159.998	170.516	152.415	13.593	146.448	-3.42632	7.60153e-35	4.32473e-33	KRT42P	17	41626327	41640199	-	4512	transcribed_unprocessed_pseudogene	keratin 42 pseudogene [Source:HGNC Symbol;Acc:HGNC:27581]	-
ENSG00000182827	1159.74	1304.16	1083.8	1074.36	347.832	185.121	306.7	289.932	1155.51	282.396	2.02904	9.17215e-35	5.20502e-33	ACBD3	1	226144679	226186730	-	3578	protein_coding	acyl-CoA binding domain containing 3 [Source:HGNC Symbol;Acc:HGNC:15453]	-
ENSG00000124782	1067.24	1248.82	883.899	1171.95	277.841	165.287	290.678	272.743	1092.98	251.637	2.11551	9.33426e-35	5.28357e-33	RREB1	6	7107597	7251980	+	17254	protein_coding	ras responsive element binding protein 1 [Source:HGNC Symbol;Acc:HGNC:10449]	zf-C2H2
ENSG00000213859	214.989	317.526	499.351	390.369	1748.7	1963.61	1883.68	1667.4	355.559	1815.85	-2.35174	1.03219e-34	5.82781e-33	KCTD11	17	7351889	7354944	+	3056	protein_coding	potassium channel tetramerization domain containing 11 [Source:HGNC Symbol;Acc:HGNC:21302]	-
ENSG00000182180	749.465	715.073	781.942	812.707	1757.19	1868.4	1683.41	1865.65	764.797	1793.66	-1.22948	1.07055e-34	6.02913e-33	MRPS16	10	73248843	73252693	-	2794	protein_coding	mitochondrial ribosomal protein S16 [Source:HGNC Symbol;Acc:HGNC:14048]	-
ENSG00000154723	393.148	345.618	315.506	393.734	1223.77	1420.14	965.875	1200.98	362.002	1202.69	-1.732	1.07519e-34	6.04002e-33	ATP5PF	21	25716503	25735673	-	2043	protein_coding	ATP synthase peripheral stalk subunit F6 [Source:HGNC Symbol;Acc:HGNC:847]	-
ENSG00000162222	531.906	512.469	466.435	494.691	119.832	163.964	135.039	163.875	501.375	145.678	1.78687	1.46969e-34	8.23545e-33	TTC9C	11	62728069	62740293	+	2657	protein_coding	tetratricopeptide repeat domain 9C [Source:HGNC Symbol;Acc:HGNC:28432]	-
ENSG00000082701	1999.14	1900.9	1849.69	1749.93	842.007	725.939	736.994	794.162	1874.92	774.776	1.27416	1.645e-34	9.19468e-33	GSK3B	3	119821323	120094417	-	8156	protein_coding	glycogen synthase kinase 3 beta [Source:HGNC Symbol;Acc:HGNC:4617]	-
ENSG00000125848	34.2613	62.9945	96.3378	57.2092	412.52	577.843	446.316	386.194	62.7007	455.718	-2.85791	1.68351e-34	9.38639e-33	FLRT3	20	14322988	14337616	-	5190	protein_coding	fibronectin leucine rich transmembrane protein 3 [Source:HGNC Symbol;Acc:HGNC:3762]	-
ENSG00000223573	1230.84	1076.87	984.251	1198.87	373.283	358.342	425.717	414.844	1122.71	393.046	1.51343	1.88587e-34	1.04885e-32	TINCR	19	5558167	5578349	-	4429	protein_coding	TINCR ubiquitin domain containing [Source:HGNC Symbol;Acc:HGNC:14607]	-
ENSG00000163961	1369.59	1671.91	913.603	1569.05	292.688	138.841	244.902	248.677	1381.04	231.277	2.57475	2.29234e-34	1.27048e-32	RNF168	3	196468783	196503768	-	5347	protein_coding	ring finger protein 168 [Source:HGNC Symbol;Acc:HGNC:26661]	-
ENSG00000182810	55.6745	60.4407	141.295	99.2748	516.445	674.37	732.417	639.455	89.1714	640.672	-2.84235	2.29578e-34	1.27048e-32	DDX28	16	68021274	68023442	-	2169	protein_coding	DEAD-box helicase 28 [Source:HGNC Symbol;Acc:HGNC:17330]	-
ENSG00000198961	1130.62	1259.89	992.279	997.796	414.641	339.83	323.866	327.749	1095.15	351.521	1.63815	2.3152e-34	1.27806e-32	PJA2	5	109334709	109409994	-	5217	protein_coding	praja ring finger ubiquitin ligase 2 [Source:HGNC Symbol;Acc:HGNC:17481]	-
ENSG00000076108	5333.62	5314.52	3627.92	4268.82	1409.35	1008.91	1445.38	1141.39	4636.22	1251.26	1.88897	2.84653e-34	1.56749e-32	BAZ2A	12	56595596	56636816	-	10918	protein_coding	bromodomain adjacent to zinc finger domain 2A [Source:HGNC Symbol;Acc:HGNC:962]	MBD
ENSG00000138162	1282.23	1470.16	1442.66	1442.85	569.468	614.867	552.746	587.886	1409.47	581.242	1.27865	3.42794e-34	1.883e-32	TACC2	10	121989174	122254545	+	18844	protein_coding	transforming acidic coiled-coil containing protein 2 [Source:HGNC Symbol;Acc:HGNC:11523]	-
ENSG00000120899	1311.35	1442.91	1380.04	1566.52	411.459	495.86	521.847	559.237	1425.21	497.101	1.52022	3.46648e-34	1.8995e-32	PTK2B	8	27311482	27459391	+	7933	protein_coding	protein tyrosine kinase 2 beta [Source:HGNC Symbol;Acc:HGNC:9612]	-
ENSG00000162512	660.386	715.924	663.125	688.193	238.604	177.187	239.18	237.217	681.907	223.047	1.60863	3.98515e-34	2.17835e-32	SDC3	1	30869467	30908761	-	7067	protein_coding	syndecan 3 [Source:HGNC Symbol;Acc:HGNC:10660]	-
ENSG00000115020	519.058	662.294	527.449	529.185	176.037	103.139	122.451	124.911	559.497	131.635	2.08181	4.62456e-34	2.52169e-32	PIKFYVE	2	208266267	208358751	+	10832	protein_coding	phosphoinositide kinase, FYVE-type zinc finger containing [Source:HGNC Symbol;Acc:HGNC:23785]	-
ENSG00000012660	2535.33	2643.22	1613.66	2293.42	642.64	662.469	629.421	670.396	2271.41	651.232	1.80234	5.02473e-34	2.73321e-32	ELOVL5	6	53267398	53349179	-	3813	protein_coding	ELOVL fatty acid elongase 5 [Source:HGNC Symbol;Acc:HGNC:21308]	-
ENSG00000224081	25.6959	10.2153	12.845	20.1915	151.646	195.7	202.559	137.517	17.2369	171.855	-3.31924	5.65206e-34	3.06697e-32	SLC44A3-AS1	1	94613814	94855426	-	10245	transcribed_processed_pseudogene	SLC44A3 antisense RNA 1 [Source:HGNC Symbol;Acc:HGNC:49057]	-
ENSG00000148158	948.18	1099.85	802.012	872.441	324.501	292.227	303.266	272.743	930.621	298.184	1.6411	6.24548e-34	3.38075e-32	SNX30	9	112750838	112881671	+	11578	protein_coding	sorting nexin family member 30 [Source:HGNC Symbol;Acc:HGNC:23685]	-
ENSG00000285103	7.70878	7.66149	5.6197	3.36525	111.349	153.386	102.996	105.43	6.08881	118.29	-4.28	6.42628e-34	3.47019e-32	AL451123.1	9	27529085	27543902	+	9804	antisense	novel transcript	-
ENSG00000184384	210.707	331.147	259.309	272.585	42.4185	52.8918	51.4981	36.6713	268.437	45.8699	2.55368	6.49449e-34	3.49855e-32	MAML2	11	95976598	96343180	-	7109	protein_coding	mastermind like transcriptional coactivator 2 [Source:HGNC Symbol;Acc:HGNC:16259]	-
ENSG00000115183	1275.38	1512.72	1206.63	1298.99	471.906	481.315	525.28	419.428	1323.43	474.482	1.47991	6.73616e-34	3.62e-32	TANC1	2	158968671	159232659	+	14884	protein_coding	tetratricopeptide repeat, ankyrin repeat and coiled-coil containing 1 [Source:HGNC Symbol;Acc:HGNC:29364]	-
ENSG00000188015	92.5054	93.6405	206.323	110.212	661.728	855.524	802.225	757.491	125.67	769.242	-2.61153	6.90603e-34	3.70236e-32	S100A3	1	153547329	153549372	-	955	protein_coding	S100 calcium binding protein A3 [Source:HGNC Symbol;Acc:HGNC:10493]	-
ENSG00000188910	2180.73	2071.16	1943.61	2548.33	5438.05	8157.23	8316.36	7454.58	2185.96	7341.56	-1.74775	8.03757e-34	4.29865e-32	GJB3	1	34781189	34786369	+	2387	protein_coding	gap junction protein beta 3 [Source:HGNC Symbol;Acc:HGNC:4285]	-
ENSG00000152409	392.291	522.684	369.295	430.752	121.953	78.0154	82.3969	84.8023	428.756	91.7919	2.21786	9.55014e-34	5.09539e-32	JMY	5	79236189	79327215	+	9042	protein_coding	junction mediating and regulatory protein, p53 cofactor [Source:HGNC Symbol;Acc:HGNC:28916]	-
ENSG00000130956	341.756	349.024	242.45	351.668	67.8696	74.0485	64.0865	52.7149	321.225	64.6799	2.31433	1.05664e-33	5.62417e-32	HABP4	9	96450201	96491336	+	4056	protein_coding	hyaluronan binding protein 4 [Source:HGNC Symbol;Acc:HGNC:17062]	-
ENSG00000187608	432.548	354.131	280.182	382.797	1068.95	1597.33	1416.77	1645.62	362.415	1432.17	-1.98249	1.13275e-33	6.0149e-32	ISG15	1	1001138	1014540	+	941	protein_coding	ISG15 ubiquitin-like modifier [Source:HGNC Symbol;Acc:HGNC:4053]	-
ENSG00000162738	348.608	349.875	342.802	355.034	100.744	101.817	101.852	111.16	349.08	103.893	1.74833	1.25559e-33	6.65136e-32	VANGL2	1	160400586	160428678	+	5340	protein_coding	VANGL planar cell polarity protein 2 [Source:HGNC Symbol;Acc:HGNC:15511]	-
ENSG00000132341	4055.68	3643.47	3617.48	3579.78	7777.43	8745.65	9007.58	9669.75	3724.1	8800.1	-1.24061	1.36447e-33	7.21099e-32	RAN	12	130871879	130877678	+	4825	protein_coding	RAN, member RAS oncogene family [Source:HGNC Symbol;Acc:HGNC:9846]	-
ENSG00000127774	47.9658	33.1998	35.3239	37.859	230.12	390.077	264.357	202.838	38.5871	271.848	-2.81474	1.38635e-33	7.30929e-32	EMC6	17	3668815	3669668	+	769	protein_coding	ER membrane protein complex subunit 6 [Source:HGNC Symbol;Acc:HGNC:28430]	-
ENSG00000183723	1128.05	1102.4	941.702	925.443	353.134	265.781	367.353	320.874	1024.4	326.785	1.64599	1.42959e-33	7.51953e-32	CMTM4	16	66614750	66696707	-	8117	protein_coding	CKLF like MARVEL transmembrane domain containing 4 [Source:HGNC Symbol;Acc:HGNC:19175]	-
ENSG00000272808	340.9	344.767	408.633	355.034	101.804	109.75	84.6857	93.9701	362.333	97.5526	1.89565	1.452e-33	7.61939e-32	AC015712.6	15	100849831	100876836	+	8164	processed_transcript	novel transcript	-
ENSG00000108389	679.229	676.765	639.041	540.964	215.274	183.799	216.292	201.692	634	204.264	1.63204	1.57307e-33	8.22021e-32	MTMR4	17	58489529	58517905	-	7475	protein_coding	myotubularin related protein 4 [Source:HGNC Symbol;Acc:HGNC:7452]	-
ENSG00000143947	11210.3	10513.3	10541	10819.3	26310.1	29891.8	22334.1	26943.1	10770.9	26369.8	-1.29171	1.57386e-33	8.22021e-32	RPS27A	2	55231903	55235853	+	3130	protein_coding	ribosomal protein S27a [Source:HGNC Symbol;Acc:HGNC:10417]	-
ENSG00000133477	2230.41	2673.01	2145.12	2937.86	935.328	844.946	831.98	881.256	2496.6	873.377	1.51493	1.86079e-33	9.69612e-32	FAM83F	22	39994949	40043529	+	16389	protein_coding	family with sequence similarity 83 member F [Source:HGNC Symbol;Acc:HGNC:25148]	-
ENSG00000249007	119.914	164.296	129.253	190.137	5.30231	7.93376	9.15521	3.43793	150.9	6.4573	4.55958	1.8925e-33	9.83833e-32	AL691482.3	1	202011370	202015657	+	987	sense_intronic	novel transcript	-
ENSG00000253276	43.6831	42.5638	69.8449	48.7961	237.544	351.73	336.454	255.553	51.222	295.32	-2.52312	1.95889e-33	1.01598e-31	CCDC71L	7	106656765	106660996	-	4232	protein_coding	coiled-coil domain containing 71 like [Source:HGNC Symbol;Acc:HGNC:26685]	-
ENSG00000141682	1447.54	1488.88	761.069	1424.34	5632.11	7416.75	5497.7	5412.45	1280.46	5989.75	-2.22591	2.01472e-33	1.04251e-31	PMAIP1	18	59899948	59904306	+	2235	protein_coding	phorbol-12-myristate-13-acetate-induced protein 1 [Source:HGNC Symbol;Acc:HGNC:9108]	-
ENSG00000008988	9565.74	9094.19	8875.12	10084	23334.4	31419	22543.6	25740.9	9404.75	25759.5	-1.4536	2.02425e-33	1.04502e-31	RPS20	8	56067295	56074581	-	3002	protein_coding	ribosomal protein S20 [Source:HGNC Symbol;Acc:HGNC:10405]	-
ENSG00000148343	1223.98	1237.76	1133.57	1187.09	393.431	347.763	500.103	417.136	1195.6	414.608	1.52661	2.24616e-33	1.1569e-31	MIGA2	9	129036621	129072082	+	6302	protein_coding	mitoguardin 2 [Source:HGNC Symbol;Acc:HGNC:23621]	-
ENSG00000169230	972.163	709.965	884.702	844.677	2204.7	3210.53	2817.52	2652.94	852.877	2721.42	-1.67358	2.28057e-33	1.17192e-31	PRELID1	5	177303774	177306959	+	1875	protein_coding	PRELI domain containing 1 [Source:HGNC Symbol;Acc:HGNC:30255]	-
ENSG00000167874	0	6.81022	2.40844	0.841312	97.5625	149.419	176.238	165.021	2.51499	147.06	-5.86982	2.33368e-33	1.19645e-31	TMEM88	17	7855065	7856099	+	875	protein_coding	transmembrane protein 88 [Source:HGNC Symbol;Acc:HGNC:32371]	-
ENSG00000148737	175.589	199.199	156.549	167.421	23.3302	13.2229	24.0324	28.6494	174.689	22.3087	2.95488	2.50264e-33	1.28013e-31	TCF7L2	10	112950250	113167678	+	6736	protein_coding	transcription factor 7 like 2 [Source:HGNC Symbol;Acc:HGNC:11641]	HMG
ENSG00000253368	288.651	260.491	321.126	330.636	906.695	1041.97	838.846	818.228	300.226	901.434	-1.58518	2.56655e-33	1.30982e-31	TRNP1	1	26993707	27000898	+	1976	protein_coding	TMF1-regulated nuclear protein 1 [Source:HGNC Symbol;Acc:HGNC:34348]	-
ENSG00000268621	2041.97	1749.37	1964.49	2130.2	4369.1	5589.34	5073.13	5502.98	1971.51	5133.64	-1.38052	2.60201e-33	1.32489e-31	IGFL2-AS1	19	46189166	46203083	-	1751	lincRNA	IGFL2 antisense RNA 1 [Source:HGNC Symbol;Acc:HGNC:52559]	-
ENSG00000241484	188.437	254.532	192.676	245.663	37.1162	23.8013	34.332	41.2552	220.327	34.1262	2.68083	3.34945e-33	1.70158e-31	ARHGAP8	22	44752558	44862788	+	4990	protein_coding	Rho GTPase activating protein 8 [Source:HGNC Symbol;Acc:HGNC:677]	-
ENSG00000125772	788.865	966.199	561.97	834.582	196.185	193.055	133.895	182.21	787.904	176.336	2.15989	3.50492e-33	1.77652e-31	GPCPD1	20	5544404	5611026	-	7527	protein_coding	glycerophosphocholine phosphodiesterase 1 [Source:HGNC Symbol;Acc:HGNC:26957]	-
ENSG00000128272	3661.67	3815.42	3659.23	3963.42	8879.25	11874.2	9130.03	9303.04	3774.94	9796.63	-1.37571	3.58192e-33	1.81143e-31	ATF4	22	39519695	39522685	+	2514	protein_coding	activating transcription factor 4 [Source:HGNC Symbol;Acc:HGNC:786]	TF_bZIP
ENSG00000136942	13694.2	12703.6	12089.6	14837.4	38672.9	53037.2	35284.2	38179.4	13331.2	41293.4	-1.63108	3.90489e-33	1.97029e-31	RPL35	9	124857880	124861981	-	1535	protein_coding	ribosomal protein L35 [Source:HGNC Symbol;Acc:HGNC:10344]	-
ENSG00000197562	1489.51	1359.49	1441.86	1441.17	318.139	154.708	333.021	363.275	1433.01	292.286	2.29059	3.95165e-33	1.98938e-31	RAB40C	16	589357	629272	+	4180	protein_coding	RAB40C, member RAS oncogene family [Source:HGNC Symbol;Acc:HGNC:18285]	-
ENSG00000111859	1577.73	1511.87	1108.69	1591.76	327.683	464.125	439.45	338.063	1447.51	392.33	1.88501	4.14001e-33	2.07952e-31	NEDD9	6	11183298	11382348	-	10359	protein_coding	neural precursor cell expressed, developmentally down-regulated 9 [Source:HGNC Symbol;Acc:HGNC:7733]	-
ENSG00000162385	202.998	220.481	203.112	230.519	621.431	579.165	556.179	648.623	214.278	601.349	-1.48928	4.3431e-33	2.17662e-31	MAGOH	1	53226892	53238610	-	1463	protein_coding	mago homolog, exon junction complex subunit [Source:HGNC Symbol;Acc:HGNC:6815]	-
ENSG00000143217	4759.75	4634.35	2727.16	4843.43	286.325	105.784	275.801	230.341	4241.17	224.563	4.23774	4.73093e-33	2.36568e-31	NECTIN4	1	161070995	161089599	-	3502	protein_coding	nectin cell adhesion molecule 4 [Source:HGNC Symbol;Acc:HGNC:19688]	-
ENSG00000166439	336.617	464.797	287.408	347.462	67.8696	43.6357	76.6749	71.0506	359.071	64.8077	2.46293	5.44735e-33	2.71783e-31	RNF169	11	74748868	74842413	+	7823	protein_coding	ring finger protein 169 [Source:HGNC Symbol;Acc:HGNC:26961]	-
ENSG00000075624	37349.9	29888.3	29720.2	30191.3	71814.5	90868.1	91707.7	88404.1	31787.4	85698.6	-1.43081	6.46995e-33	3.22082e-31	ACTB	7	5527147	5563784	-	3519	protein_coding	actin beta [Source:HGNC Symbol;Acc:HGNC:132]	-
ENSG00000078401	17.9872	21.2819	23.2816	27.7633	148.465	175.865	148.772	139.809	22.5785	153.228	-2.75967	7.06195e-33	3.5077e-31	EDN1	6	12290363	12297194	+	2033	protein_coding	endothelin 1 [Source:HGNC Symbol;Acc:HGNC:3176]	-
ENSG00000187239	516.488	555.033	480.083	517.407	193.004	165.287	167.083	166.167	517.253	172.885	1.57898	7.26699e-33	3.60152e-31	FNBP1	9	129887187	130043194	-	6600	protein_coding	formin binding protein 1 [Source:HGNC Symbol;Acc:HGNC:17069]	-
ENSG00000174744	1089.51	841.913	1016.36	938.904	2316.05	2943.43	2912.5	3224.78	971.672	2849.19	-1.55181	7.47949e-33	3.69862e-31	BRMS1	11	66337333	66345125	-	2514	protein_coding	BRMS1, transcriptional repressor and anoikis regulator [Source:HGNC Symbol;Acc:HGNC:17262]	-
ENSG00000116679	1622.27	2002.2	1687.52	1805.46	760.351	606.933	646.587	664.667	1779.36	669.634	1.40881	9.46599e-33	4.67059e-31	IVNS1ABP	1	185296388	185317329	-	7929	protein_coding	influenza virus NS1A binding protein [Source:HGNC Symbol;Acc:HGNC:16951]	-
ENSG00000150907	638.972	798.498	528.252	725.211	189.823	99.1721	124.74	104.284	672.733	129.505	2.37154	1.04358e-32	5.13772e-31	FOXO1	13	40469953	40666597	-	6232	protein_coding	forkhead box O1 [Source:HGNC Symbol;Acc:HGNC:3819]	Fork
ENSG00000272068	244.111	199.199	192.676	238.091	40.2976	34.3796	48.0649	33.2333	218.519	38.9938	2.48226	1.05533e-32	5.18414e-31	AL365181.2	1	156637783	156641004	-	3222	lincRNA	novel transcript	-
ENSG00000254087	1004.71	1067.5	926.448	926.285	382.827	302.805	315.855	382.756	981.236	346.061	1.50156	1.14853e-32	5.62957e-31	LYN	8	55879813	56014168	+	6185	protein_coding	LYN proto-oncogene, Src family tyrosine kinase [Source:HGNC Symbol;Acc:HGNC:6735]	-
ENSG00000184731	567.024	818.928	540.294	731.1	191.944	169.254	159.072	163.875	664.337	171.036	1.95654	1.19622e-32	5.85048e-31	FAM110C	2	38814	46870	-	3968	protein_coding	family with sequence similarity 110 member C [Source:HGNC Symbol;Acc:HGNC:33340]	-
ENSG00000189280	570.45	560.992	577.224	705.019	1521.76	1540.47	1852.79	1840.44	603.421	1688.87	-1.48493	1.24097e-32	6.04407e-31	GJB5	1	34755047	34758512	+	1355	protein_coding	gap junction protein beta 5 [Source:HGNC Symbol;Acc:HGNC:4287]	-
ENSG00000184602	1447.54	1151.78	958.561	1167.74	264.055	116.362	252.913	241.801	1181.4	218.783	2.42899	1.24123e-32	6.04407e-31	SNN	16	11668414	11679159	+	3312	protein_coding	stannin [Source:HGNC Symbol;Acc:HGNC:11149]	-
ENSG00000170412	2101.07	1921.33	1711.6	2221.91	627.794	700.816	770.182	778.118	1988.98	719.227	1.46764	1.26053e-32	6.12469e-31	GPRC5C	17	74424851	74451653	+	8005	protein_coding	G protein-coupled receptor class C group 5 member C [Source:HGNC Symbol;Acc:HGNC:13309]	-
ENSG00000125995	1426.12	1224.99	1399.31	1722.17	3676.62	4366.22	3793.69	4420.03	1443.15	4064.14	-1.4936	1.61353e-32	7.82282e-31	ROMO1	20	35699272	35700984	+	702	protein_coding	reactive oxygen species modulator 1 [Source:HGNC Symbol;Acc:HGNC:16185]	-
ENSG00000147604	12916.5	12180.9	11787.7	12540.6	31449.1	37210.7	26757.2	30383.3	12356.4	31450.1	-1.34778	1.69716e-32	8.21042e-31	RPL7	8	73290267	73295789	-	2907	protein_coding	ribosomal protein L7 [Source:HGNC Symbol;Acc:HGNC:10363]	-
ENSG00000164327	820.557	1165.4	627.801	758.863	219.516	153.386	171.66	153.561	843.155	174.531	2.26979	1.88142e-32	9.08211e-31	RICTOR	5	38937919	39074408	-	13550	protein_coding	RPTOR independent companion of MTOR complex 2 [Source:HGNC Symbol;Acc:HGNC:28611]	-
ENSG00000106803	895.932	748.272	746.618	901.887	1915.19	2245.26	2074.8	2246.11	823.177	2120.34	-1.3649	2.21351e-32	1.06621e-30	SEC61B	9	99222064	99230615	+	1190	protein_coding	Sec61 translocon beta subunit [Source:HGNC Symbol;Acc:HGNC:16993]	-
ENSG00000090975	877.945	941.512	904.772	871.599	313.897	386.11	341.032	362.129	898.957	350.792	1.35962	2.26994e-32	1.09104e-30	PITPNM2	12	122983480	123150015	-	9161	protein_coding	phosphatidylinositol transfer protein membrane associated 2 [Source:HGNC Symbol;Acc:HGNC:21044]	-
ENSG00000118058	1811.56	2412.52	1922.74	2038.5	770.956	561.975	700.374	708.214	2046.33	685.38	1.57678	2.42566e-32	1.16338e-30	KMT2A	11	118436464	118526832	+	31305	protein_coding	lysine methyltransferase 2A [Source:HGNC Symbol;Acc:HGNC:7132]	-
ENSG00000138767	301.499	352.429	236.028	299.507	59.3859	39.6688	46.9204	71.0506	297.366	54.2564	2.44699	2.54158e-32	1.21636e-30	CNOT6L	4	77713387	77819615	-	9367	protein_coding	CCR4-NOT transcription complex subunit 6 like [Source:HGNC Symbol;Acc:HGNC:18042]	-
ENSG00000108799	2451.39	2235.45	1941.21	2064.58	880.184	879.326	715.251	791.87	2173.16	816.658	1.41212	2.63615e-32	1.25892e-30	EZH1	17	42700275	42745049	-	6988	protein_coding	enhancer of zeste 1 polycomb repressive complex 2 subunit [Source:HGNC Symbol;Acc:HGNC:3526]	-
ENSG00000108306	483.94	514.171	552.337	538.44	184.52	191.733	178.527	161.583	522.222	179.091	1.54514	2.89869e-32	1.38134e-30	FBXL20	17	39252644	39402523	-	11079	protein_coding	F-box and leucine rich repeat protein 20 [Source:HGNC Symbol;Acc:HGNC:24679]	-
ENSG00000136271	1319.91	1103.25	1499.66	1215.7	3282.13	3184.08	3598	3839.02	1284.63	3475.81	-1.43592	2.9729e-32	1.41368e-30	DDX56	7	44565417	44575051	-	4068	protein_coding	DEAD-box helicase 56 [Source:HGNC Symbol;Acc:HGNC:18193]	-
ENSG00000099901	1546.04	1355.23	1506.88	1473.14	3471.95	3451.19	2996.04	3505.54	1470.32	3356.18	-1.19064	3.26414e-32	1.54887e-30	RANBP1	22	20115938	20127357	+	4622	protein_coding	RAN binding protein 1 [Source:HGNC Symbol;Acc:HGNC:9847]	-
ENSG00000137818	29120.4	26527.5	26682.4	30860.2	65162.2	92423.1	71573.1	78285.1	28297.6	76860.9	-1.44156	3.33637e-32	1.57978e-30	RPLP1	15	69452784	69456194	+	3271	protein_coding	ribosomal protein lateral stalk subunit P1 [Source:HGNC Symbol;Acc:HGNC:10372]	-
ENSG00000241269	5.13919	2.55383	4.81689	1.68262	100.744	144.13	107.574	97.408	3.54813	112.464	-4.97939	3.4029e-32	1.60787e-30	AC093620.1	7	5419827	5420767	+	583	antisense	novel transcript	-
ENSG00000099783	2471.95	2277.17	2645.28	2507.95	5365.94	5322.23	5271.11	5005.63	2475.59	5241.23	-1.08207	3.74006e-32	1.76344e-30	HNRNPM	19	8444767	8489114	+	5614	protein_coding	heterogeneous nuclear ribonucleoprotein M [Source:HGNC Symbol;Acc:HGNC:5046]	-
ENSG00000186591	4756.32	5182.57	3949.85	4914.1	1877.02	1703.11	1351.54	1471.43	4700.71	1600.78	1.55403	3.89966e-32	1.83481e-30	UBE2H	7	129830732	129952949	-	6503	protein_coding	ubiquitin conjugating enzyme E2 H [Source:HGNC Symbol;Acc:HGNC:12484]	-
ENSG00000116288	1970.02	1654.88	1707.59	1765.91	4085.96	4765.55	3929.87	4182.82	1774.6	4241.05	-1.25677	3.96904e-32	1.86353e-30	PARK7	1	7954291	7985505	+	2397	protein_coding	Parkinsonism associated deglycase [Source:HGNC Symbol;Acc:HGNC:16369]	-
ENSG00000119508	11.9914	16.1743	25.6901	29.4459	135.739	238.013	216.292	184.502	20.8254	193.637	-3.21121	4.49565e-32	2.10635e-30	NR4A3	9	99821855	99866891	+	6314	protein_coding	nuclear receptor subfamily 4 group A member 3 [Source:HGNC Symbol;Acc:HGNC:7982]	NGFIB-like
ENSG00000196422	2577.3	2283.12	2327.36	2300.99	1032.89	977.175	1130.67	974.08	2372.19	1028.7	1.20506	5.16325e-32	2.41406e-30	PPP1R26	9	135479079	135488893	+	5276	protein_coding	protein phosphatase 1 regulatory subunit 26 [Source:HGNC Symbol;Acc:HGNC:29089]	-
ENSG00000100985	4.28266	5.95894	4.01407	12.6197	116.651	104.461	102.996	115.744	6.71884	109.963	-4.03645	6.30405e-32	2.94127e-30	MMP9	20	46008908	46016561	+	2336	protein_coding	matrix metallopeptidase 9 [Source:HGNC Symbol;Acc:HGNC:7176]	-
ENSG00000163170	162.741	160.04	144.507	174.993	533.412	617.511	448.605	497.354	160.57	524.221	-1.7063	6.36317e-32	2.96266e-30	BOLA3	2	74135398	74147994	-	3156	protein_coding	bolA family member 3 [Source:HGNC Symbol;Acc:HGNC:24415]	-
ENSG00000178934	861.671	793.39	833.322	968.35	2632.07	4437.62	2708.8	3001.31	864.183	3194.95	-1.88601	6.42237e-32	2.98399e-30	LGALS7B	19	38789211	38791749	+	644	protein_coding	galectin 7B [Source:HGNC Symbol;Acc:HGNC:34447]	-
ENSG00000239672	598.715	447.772	466.435	467.769	1268.31	1640.97	1441.95	1670.83	495.173	1505.51	-1.60403	6.57871e-32	3.05028e-30	NME1	17	51153536	51162428	+	3438	protein_coding	NME/NM23 nucleoside diphosphate kinase 1 [Source:HGNC Symbol;Acc:HGNC:7849]	-
ENSG00000198807	442.827	601.853	464.027	653.699	84.837	68.7593	141.906	107.722	540.602	100.806	2.4197	6.90629e-32	3.18908e-30	PAX9	14	36657568	36679715	+	6035	protein_coding	paired box 9 [Source:HGNC Symbol;Acc:HGNC:8623]	PAX
ENSG00000185641	320.343	283.475	232.816	291.935	917.3	1224.44	853.723	881.256	282.142	969.181	-1.77994	6.90668e-32	3.18908e-30	AC034236.1	5	116051917	116052289	-	373	processed_pseudogene	ribosomal protein S25 (RPS25) pseudogene	-
ENSG00000172922	267.238	217.076	223.985	243.139	616.129	908.416	805.658	783.848	237.859	778.513	-1.70971	7.21702e-32	3.32549e-30	RNASEH2C	11	65714005	65720947	-	5101	protein_coding	ribonuclease H2 subunit C [Source:HGNC Symbol;Acc:HGNC:24116]	-
ENSG00000175334	2209.85	1945.17	1999.01	2033.45	4523.93	5591.98	4526.11	4847.48	2046.87	4872.38	-1.25101	8.4232e-32	3.87328e-30	BANF1	11	66002079	66004149	+	1645	protein_coding	barrier to autointegration factor 1 [Source:HGNC Symbol;Acc:HGNC:17397]	-
ENSG00000233276	3467.24	2534.25	2882.11	3097.71	7783.79	12157.2	9111.72	9923.01	2995.33	9743.93	-1.70169	9.15397e-32	4.20066e-30	GPX1	3	49357171	49358600	-	1430	polymorphic_pseudogene	glutathione peroxidase 1 [Source:HGNC Symbol;Acc:HGNC:4553]	-
ENSG00000236552	1018.42	1031.75	1040.45	1127.36	2421.04	3201.27	2492.51	2711.38	1054.49	2706.55	-1.35947	9.8624e-32	4.51645e-30	RPL13AP5	10	96750288	96750899	+	612	processed_pseudogene	ribosomal protein L13a pseudogene 5 [Source:HGNC Symbol;Acc:HGNC:23736]	-
ENSG00000110514	1653.11	1641.26	1612.86	1681.78	704.147	667.759	793.07	739.155	1647.25	726.033	1.18138	9.98416e-32	4.56284e-30	MADD	11	47269161	47330031	+	8366	protein_coding	MAP kinase activating death domain [Source:HGNC Symbol;Acc:HGNC:6766]	-
ENSG00000132002	9811.57	9313.82	5631.75	10056.2	2445.43	2206.91	2514.25	2336.65	8703.33	2375.81	1.87303	1.25077e-31	5.70445e-30	DNAJB1	19	14514770	14529770	-	3672	protein_coding	DnaJ heat shock protein family (Hsp40) member B1 [Source:HGNC Symbol;Acc:HGNC:5270]	-
ENSG00000122952	459.957	463.095	432.717	475.341	1137.88	1106.76	1042.55	1298.39	457.778	1146.39	-1.32467	1.2592e-31	5.73118e-30	ZWINT	10	56357228	56361275	-	2378	protein_coding	ZW10 interacting kinetochore protein [Source:HGNC Symbol;Acc:HGNC:13195]	-
ENSG00000164211	1537.47	1672.76	942.505	1300.67	399.794	296.194	268.934	302.538	1363.35	316.865	2.1039	1.28961e-31	5.85763e-30	STARD4	5	111496033	111512590	-	5684	protein_coding	StAR related lipid transfer domain containing 4 [Source:HGNC Symbol;Acc:HGNC:18058]	-
ENSG00000010310	387.152	422.233	430.309	461.039	118.772	144.13	138.473	135.225	425.183	134.15	1.66702	1.30363e-31	5.90924e-30	GIPR	19	45668244	45683724	+	4736	protein_coding	gastric inhibitory polypeptide receptor [Source:HGNC Symbol;Acc:HGNC:4271]	-
ENSG00000166025	4055.68	4882.07	3673.68	4485.03	1663.87	1323.62	1704.01	1482.89	4274.12	1543.6	1.46881	1.31011e-31	5.92657e-30	AMOTL1	11	94706431	94876753	+	10035	protein_coding	angiomotin like 1 [Source:HGNC Symbol;Acc:HGNC:17811]	-
ENSG00000125877	1230.84	911.718	1168.9	1038.18	2719.02	3554.33	2917.08	3180.09	1087.41	3092.63	-1.50762	1.39389e-31	6.29282e-30	ITPA	20	3208868	3223870	+	2071	protein_coding	inosine triphosphatase [Source:HGNC Symbol;Acc:HGNC:6176]	-
ENSG00000114391	5671.95	5173.21	4795.21	5585.47	13923.9	16893.6	12273.7	13103.1	5306.46	14048.6	-1.40456	1.65423e-31	7.45304e-30	RPL24	3	101681091	101686782	-	2682	protein_coding	ribosomal protein L24 [Source:HGNC Symbol;Acc:HGNC:10325]	-
ENSG00000099385	435.974	362.644	416.661	399.623	1110.3	1511.38	1094.05	1137.96	403.726	1213.42	-1.58671	1.66532e-31	7.4879e-30	BCL7C	16	30833626	30894960	-	4398	protein_coding	BCL tumor suppressor 7C [Source:HGNC Symbol;Acc:HGNC:1006]	-
ENSG00000141068	262.099	268.152	304.267	256.6	40.2976	63.4701	72.0973	58.4448	272.779	58.5774	2.22552	1.92076e-31	8.61906e-30	KSR1	17	27456470	27626438	+	12178	protein_coding	kinase suppressor of ras 1 [Source:HGNC Symbol;Acc:HGNC:6465]	-
ENSG00000255112	545.611	625.689	614.153	614.999	1451.77	2060.13	1754.37	1565.4	600.113	1707.92	-1.50821	2.22022e-31	9.94285e-30	CHMP1B	18	11851396	11854449	+	3054	protein_coding	charged multivesicular body protein 1B [Source:HGNC Symbol;Acc:HGNC:24287]	-
ENSG00000130821	2075.38	1616.58	1573.52	1750.77	4347.89	5584.05	6043.58	4775.29	1754.06	5187.7	-1.56436	2.44134e-31	1.09112e-29	SLC6A8	X	153688099	153696593	+	5498	protein_coding	solute carrier family 6 member 8 [Source:HGNC Symbol;Acc:HGNC:11055]	-
ENSG00000182749	637.259	674.211	647.872	705.019	213.153	130.907	212.859	209.714	666.09	191.658	1.79239	2.76938e-31	1.23526e-29	PAQR7	1	25861210	25871253	-	3297	protein_coding	progestin and adipoQ receptor family member 7 [Source:HGNC Symbol;Acc:HGNC:23146]	-
ENSG00000171368	370.878	289.434	317.915	349.986	60.4463	55.5364	99.5629	65.3207	332.053	70.2166	2.23863	3.07707e-31	1.36976e-29	TPPP	5	659862	693395	-	6022	protein_coding	tubulin polymerization promoting protein [Source:HGNC Symbol;Acc:HGNC:24164]	-
ENSG00000102580	652.677	751.678	617.365	573.775	237.544	167.931	189.971	183.356	648.874	194.7	1.73324	3.22979e-31	1.43488e-29	DNAJC3	13	95677139	95794989	+	5591	protein_coding	DnaJ heat shock protein family (Hsp40) member C3 [Source:HGNC Symbol;Acc:HGNC:9439]	-
ENSG00000107957	1691.65	2184.38	1769.4	1815.55	712.631	706.105	703.807	559.237	1865.25	670.445	1.47627	4.02075e-31	1.78272e-29	SH3PXD2A	10	103594027	103855543	-	11756	protein_coding	SH3 and PX domains 2A [Source:HGNC Symbol;Acc:HGNC:23664]	-
ENSG00000165813	522.484	653.781	394.182	542.646	141.041	78.0154	113.296	88.2402	528.273	105.148	2.32276	4.16526e-31	1.84313e-29	CCDC186	10	114120862	114174232	-	9003	protein_coding	coiled-coil domain containing 186 [Source:HGNC Symbol;Acc:HGNC:24349]	-
ENSG00000166197	1569.17	1516.98	1758.97	1340.21	3957.64	3474.99	4320.11	4132.39	1546.33	3971.29	-1.36082	4.27289e-31	1.88701e-29	NOLC1	10	102152176	102163871	+	3970	protein_coding	nucleolar and coiled-body phosphoprotein 1 [Source:HGNC Symbol;Acc:HGNC:15608]	-
ENSG00000001084	1852.68	2171.61	1965.29	1763.39	762.472	493.216	595.089	670.396	1938.24	630.293	1.61901	4.47017e-31	1.97023e-29	GCLC	6	53497341	53616970	-	8646	protein_coding	glutamate-cysteine ligase catalytic subunit [Source:HGNC Symbol;Acc:HGNC:4311]	-
ENSG00000254842	1.71306	11.9179	8.02815	6.7305	117.711	158.675	89.2633	135.225	7.0974	125.219	-4.13599	4.73238e-31	2.08169e-29	LINC02551	11	130844191	130865561	-	2255	lincRNA	long intergenic non-protein coding RNA 2551 [Source:HGNC Symbol;Acc:HGNC:53586]	-
ENSG00000135503	1785.01	1774.06	1411.35	1701.13	339.348	129.585	349.042	332.333	1667.89	287.577	2.53304	5.05408e-31	2.21882e-29	ACVR1B	12	51951667	51997078	+	5690	protein_coding	activin A receptor type 1B [Source:HGNC Symbol;Acc:HGNC:172]	-
ENSG00000081320	597.859	604.407	331.563	513.2	99.6834	66.1147	107.574	105.43	511.757	94.7004	2.42917	5.3066e-31	2.3251e-29	STK17B	2	196133566	196176503	-	6580	protein_coding	serine/threonine kinase 17b [Source:HGNC Symbol;Acc:HGNC:11396]	-
ENSG00000186350	3684.8	4379.82	4247.69	4859.42	1801.73	1659.48	1829.9	1815.23	4292.93	1776.58	1.27265	6.06134e-31	2.65059e-29	RXRA	9	134317098	134440585	+	11083	protein_coding	retinoid X receptor alpha [Source:HGNC Symbol;Acc:HGNC:10477]	RXR-like
ENSG00000130202	2387.15	1978.37	1662.63	2151.23	669.152	785.443	727.839	725.403	2044.85	726.959	1.49256	6.25963e-31	2.73194e-29	NECTIN2	19	44846175	44889228	+	3747	protein_coding	nectin cell adhesion molecule 2 [Source:HGNC Symbol;Acc:HGNC:9707]	-
ENSG00000175550	4071.09	3359.14	3749.95	3867.51	7845.3	9585.31	8843.93	8680.78	3761.92	8738.83	-1.21587	6.42249e-31	2.79755e-29	DRAP1	11	65919257	65921561	+	1737	protein_coding	DR1 associated protein 1 [Source:HGNC Symbol;Acc:HGNC:3019]	-
ENSG00000143314	796.574	778.067	806.829	818.597	1722.19	2085.26	1758.94	1809.5	800.017	1843.97	-1.20414	6.47463e-31	2.81476e-29	MRPL24	1	156737303	156741590	-	1695	protein_coding	mitochondrial ribosomal protein L24 [Source:HGNC Symbol;Acc:HGNC:14037]	-
ENSG00000119705	512.206	415.423	387.76	415.608	1383.9	1596.01	1080.31	1385.49	432.749	1361.43	-1.65338	6.76615e-31	2.93277e-29	SLIRP	14	77708071	77761104	+	2631	protein_coding	SRA stem-loop interacting RNA binding protein [Source:HGNC Symbol;Acc:HGNC:20495]	-
ENSG00000004961	415.418	403.505	415.858	401.306	893.97	945.44	930.398	939.701	409.022	927.377	-1.18067	6.77237e-31	2.93277e-29	HCCS	X	11111301	11123078	+	2335	protein_coding	holocytochrome c synthase [Source:HGNC Symbol;Acc:HGNC:4837]	-
ENSG00000111912	3249.68	3923.54	2235.04	3304.67	971.383	885.937	942.987	974.08	3178.23	943.597	1.75168	6.88155e-31	2.97427e-29	NCOA7	6	125781161	125932030	+	7820	protein_coding	nuclear receptor coactivator 7 [Source:HGNC Symbol;Acc:HGNC:21081]	-
ENSG00000196639	551.606	656.335	492.126	702.496	127.255	48.9249	121.307	116.89	600.64	103.594	2.52794	7.63328e-31	3.29279e-29	HRH1	3	11137093	11263557	+	5546	protein_coding	histamine receptor H1 [Source:HGNC Symbol;Acc:HGNC:5182]	-
ENSG00000163344	316.06	311.567	339.591	387.004	839.886	998.332	861.734	920.219	338.555	905.043	-1.41776	7.96316e-31	3.42846e-29	PMVK	1	154924734	154936991	-	1280	protein_coding	phosphomevalonate kinase [Source:HGNC Symbol;Acc:HGNC:9141]	-
ENSG00000137075	412.848	483.525	264.126	349.986	63.6277	38.3465	68.6641	76.7805	377.621	61.8547	2.6028	8.11349e-31	3.48646e-29	RNF38	9	36336396	36487548	-	6138	protein_coding	ring finger protein 38 [Source:HGNC Symbol;Acc:HGNC:18052]	-
ENSG00000142623	423.983	641.863	521.83	650.334	147.404	157.353	120.162	146.685	559.502	142.901	1.97031	8.42678e-31	3.61412e-29	PADI1	1	17205126	17246005	+	4903	protein_coding	peptidyl arginine deiminase 1 [Source:HGNC Symbol;Acc:HGNC:18367]	-
ENSG00000183475	714.347	833.4	604.52	637.715	198.306	99.1721	148.772	179.918	697.495	156.542	2.15008	8.67941e-31	3.71532e-29	ASB7	15	100602534	100651705	+	5397	protein_coding	ankyrin repeat and SOCS box containing 7 [Source:HGNC Symbol;Acc:HGNC:17182]	-
ENSG00000174292	208.137	254.532	371.703	281.84	887.607	1090.89	1068.87	1096.7	279.053	1036.02	-1.89129	8.83386e-31	3.77419e-29	TNK1	17	7380534	7389774	+	3860	protein_coding	tyrosine kinase non receptor 1 [Source:HGNC Symbol;Acc:HGNC:11940]	-
ENSG00000179967	273.234	228.142	241.647	264.172	685.059	1032.71	745.005	854.899	251.799	829.419	-1.71871	9.70484e-31	4.13838e-29	PPP1R14BP3	4	139114930	139115374	-	445	processed_pseudogene	protein phosphatase 1 regulatory inhibitor subunit 14B pseudogene 3 [Source:HGNC Symbol;Acc:HGNC:16330]	-
ENSG00000275202	4.28266	6.81022	4.81689	9.25443	96.5021	141.485	100.707	91.6782	6.29105	107.593	-4.09427	1.06962e-30	4.55243e-29	AL161421.1	13	48974967	48976867	-	1101	antisense	novel transcript, antisense to FNDC3A	-
ENSG00000197872	200.428	296.244	252.084	334.001	47.7208	52.8918	49.2093	55.0069	270.689	51.2072	2.40383	1.17106e-30	4.97468e-29	FAM49A	2	16549459	16666331	-	5448	protein_coding	family with sequence similarity 49 member A [Source:HGNC Symbol;Acc:HGNC:25373]	-
ENSG00000233223	56.5311	62.9945	105.169	74.0355	300.111	485.282	399.396	378.172	74.6824	390.74	-2.38358	1.19752e-30	5.07739e-29	AC016876.1	17	7581964	7584072	-	1058	antisense	uncharacterized LOC100996842 [Source:NCBI gene;Acc:100996842]	-
ENSG00000107341	1080.09	1172.21	1021.98	1201.39	492.054	404.622	391.385	419.428	1118.92	426.872	1.3889	1.21596e-30	5.14579e-29	UBE2R2	9	33817567	33920404	+	4075	protein_coding	ubiquitin conjugating enzyme E2 R2 [Source:HGNC Symbol;Acc:HGNC:19907]	-
ENSG00000155252	1974.3	1660.84	1376.02	1794.52	588.556	507.761	645.442	571.842	1701.42	578.401	1.5557	1.22829e-30	5.18812e-29	PI4K2A	10	97640686	97676434	+	4189	protein_coding	phosphatidylinositol 4-kinase type 2 alpha [Source:HGNC Symbol;Acc:HGNC:30031]	-
ENSG00000179361	1519.49	1235.2	846.97	1094.55	196.185	150.742	303.266	256.699	1174.05	226.723	2.37063	1.23657e-30	5.21322e-29	ARID3B	15	74541177	74598131	+	6212	protein_coding	AT-rich interaction domain 3B [Source:HGNC Symbol;Acc:HGNC:14350]	ARID
ENSG00000087077	2242.4	2032.85	2434.13	2401.1	4810.26	6157.92	5499.99	5834.17	2277.62	5575.59	-1.29138	1.47063e-30	6.18828e-29	TRIP6	7	100867138	100873454	+	2802	protein_coding	thyroid hormone receptor interactor 6 [Source:HGNC Symbol;Acc:HGNC:12311]	-
ENSG00000144136	20462.5	15655.8	6549.36	14942.5	1068.95	792.054	945.275	1003.88	14402.6	952.538	3.91826	1.5994e-30	6.71747e-29	SLC20A1	2	112645857	112663827	+	5577	protein_coding	solute carrier family 20 member 1 [Source:HGNC Symbol;Acc:HGNC:10946]	-
ENSG00000112695	1319.91	1306.71	1031.62	1447.06	3248.2	4064.73	3260.4	3747.34	1276.32	3580.17	-1.48797	1.72869e-30	7.24686e-29	COX7A2	6	75237675	75250323	-	1922	protein_coding	cytochrome c oxidase subunit 7A2 [Source:HGNC Symbol;Acc:HGNC:2288]	-
ENSG00000055609	713.491	994.292	706.477	710.067	249.209	214.212	204.848	159.291	781.082	206.89	1.91581	1.97769e-30	8.26404e-29	KMT2C	7	152134922	152436005	-	20114	protein_coding	lysine methyltransferase 2C [Source:HGNC Symbol;Acc:HGNC:13726]	-
ENSG00000123144	1084.37	1157.74	1245.97	1345.26	2681.91	3021.44	2782.04	2725.13	1208.33	2802.63	-1.21347	1.97875e-30	8.26404e-29	TRIR	19	12730640	12734775	-	1402	protein_coding	telomerase RNA component interacting RNase [Source:HGNC Symbol;Acc:HGNC:28424]	-
ENSG00000100592	1122.91	1256.48	1115.11	1081.09	492.054	346.441	376.508	360.983	1143.9	393.997	1.53556	2.23042e-30	9.29773e-29	DAAM1	14	59188646	59371405	+	10712	protein_coding	dishevelled associated activator of morphogenesis 1 [Source:HGNC Symbol;Acc:HGNC:18142]	-
ENSG00000137269	570.45	642.714	623.787	675.574	235.423	189.088	242.613	205.13	628.131	218.063	1.52376	2.40855e-30	1.00216e-28	LRRC1	6	53794497	53924121	+	4897	protein_coding	leucine rich repeat containing 1 [Source:HGNC Symbol;Acc:HGNC:14307]	-
ENSG00000259062	0.856531	2.55383	1.60563	4.20656	81.6556	170.576	125.884	134.079	2.30564	128.049	-5.79313	2.49431e-30	1.0359e-28	ACTN1-AS1	14	68979682	68987463	+	936	antisense	ACTN1 antisense RNA 1 [Source:HGNC Symbol;Acc:HGNC:20131]	-
ENSG00000210135	424.84	475.864	412.647	494.691	1120.91	1220.48	1082.6	1372.88	452.01	1199.22	-1.40763	2.5095e-30	1.04028e-28	MT-TN	MT	5657	5729	-	73	Mt_tRNA	mitochondrially encoded tRNA asparagine [Source:HGNC Symbol;Acc:HGNC:7493]	-
ENSG00000054267	376.017	532.048	362.07	396.258	120.893	83.3045	76.6749	92.8241	416.598	93.4241	2.15227	2.60047e-30	1.07599e-28	ARID4B	1	235131634	235328219	-	11073	protein_coding	AT-rich interaction domain 4B [Source:HGNC Symbol;Acc:HGNC:15550]	ARID
ENSG00000166794	1966.6	1705.96	1819.98	1807.14	4043.54	5182.07	4257.17	4172.5	1824.92	4413.82	-1.27394	2.65368e-30	1.09597e-28	PPIB	15	64155812	64163205	-	1911	protein_coding	peptidylprolyl isomerase B [Source:HGNC Symbol;Acc:HGNC:9255]	-
ENSG00000186792	11.9914	21.2819	21.676	16.8262	109.228	146.775	148.772	158.145	17.9439	140.73	-2.96714	2.81625e-30	1.16096e-28	HYAL3	3	50292831	50299468	-	2030	protein_coding	hyaluronoglucosaminidase 3 [Source:HGNC Symbol;Acc:HGNC:5322]	-
ENSG00000167615	4245.83	3369.35	3156.67	3537.72	1334.06	1290.56	1475.13	1120.77	3577.39	1305.13	1.4546	2.93033e-30	1.20576e-28	LENG8	19	54448887	54462037	+	6469	protein_coding	leukocyte receptor cluster member 8 [Source:HGNC Symbol;Acc:HGNC:15500]	-
ENSG00000169469	2407.71	3148.02	3232.94	3983.61	9637.48	12852.7	9381.8	11099.9	3193.07	10743	-1.75029	2.97858e-30	1.22336e-28	SPRR1B	1	153031202	153032900	+	620	protein_coding	small proline rich protein 1B [Source:HGNC Symbol;Acc:HGNC:11260]	-
ENSG00000149187	2698.93	2928.39	2047.18	2443.17	791.105	403.3	671.764	625.703	2529.42	622.968	2.01993	3.74272e-30	1.53438e-28	CELF1	11	47465933	47565569	-	10452	protein_coding	CUGBP Elav-like family member 1 [Source:HGNC Symbol;Acc:HGNC:2549]	-
ENSG00000229320	27.409	31.4972	29.7042	21.8741	133.618	179.832	205.992	161.583	27.6211	170.256	-2.62198	3.85863e-30	1.579e-28	KRT8P12	3	160565447	160569248	+	2047	transcribed_processed_pseudogene	keratin 8 pseudogene 12 [Source:HGNC Symbol;Acc:HGNC:28057]	-
ENSG00000174365	161.884	137.907	201.507	116.942	512.203	702.138	625.987	583.302	154.56	605.908	-1.96909	4.17771e-30	1.70643e-28	SNHG11	20	38446578	38450921	+	2813	processed_transcript	small nucleolar RNA host gene 11 [Source:HGNC Symbol;Acc:HGNC:25046]	-
ENSG00000260401	1690.79	1801.3	1525.35	1850.89	679.756	501.149	667.186	664.667	1717.08	628.19	1.44913	5.26224e-30	2.14549e-28	AP002761.4	11	73238975	73242335	+	3361	sense_overlapping	novel transcript, overlapping to P2RY2	-
ENSG00000140455	545.611	553.33	480.083	509.835	198.306	195.7	178.527	181.064	522.215	188.399	1.47084	5.66751e-30	2.30651e-28	USP3	15	63504511	63594640	+	7764	protein_coding	ubiquitin specific peptidase 3 [Source:HGNC Symbol;Acc:HGNC:12626]	-
ENSG00000106028	781.157	716.775	727.35	736.148	1862.17	1844.6	1507.18	1882.84	740.358	1774.2	-1.26087	5.76284e-30	2.34104e-28	SSBP1	7	141738321	141787922	+	4988	protein_coding	single stranded DNA binding protein 1 [Source:HGNC Symbol;Acc:HGNC:11317]	-
ENSG00000117036	1540.04	1558.69	1045.27	1495.85	424.185	404.622	506.97	404.53	1409.96	435.077	1.69578	6.44696e-30	2.61418e-28	ETV3	1	157121191	157138474	-	6707	protein_coding	ETS variant 3 [Source:HGNC Symbol;Acc:HGNC:3492]	ETS
ENSG00000180879	1786.72	1506.76	1616.07	1648.97	3790.09	5651.49	4245.73	4777.58	1639.63	4616.22	-1.4931	6.47962e-30	2.62266e-28	SSR4	X	153793516	153798505	+	4590	protein_coding	signal sequence receptor subunit 4 [Source:HGNC Symbol;Acc:HGNC:11326]	-
ENSG00000108848	2269.81	2478.92	1740.5	2147.03	782.621	531.562	694.652	723.111	2159.06	682.987	1.65911	6.52556e-30	2.63647e-28	LUC7L3	17	50719544	50756213	+	8151	protein_coding	LUC7 like 3 pre-mRNA splicing factor [Source:HGNC Symbol;Acc:HGNC:24309]	-
ENSG00000048649	771.735	995.143	746.618	823.644	307.534	234.046	225.447	278.472	834.285	261.375	1.67228	6.60765e-30	2.6648e-28	RSF1	11	77659996	77821017	-	15740	protein_coding	remodeling and spacing factor 1 [Source:HGNC Symbol;Acc:HGNC:18118]	-
ENSG00000285796	8.56531	2.55383	8.02815	5.88918	120.893	96.5275	127.029	81.3644	6.25912	106.453	-4.08608	6.85851e-30	2.76098e-28	AL162458.1	20	45926518	45935055	-	8538	antisense	novel transcript	-
ENSG00000100320	2724.63	3068	2304.08	2494.49	1120.91	936.184	870.889	836.563	2647.8	941.136	1.49187	7.23346e-30	2.90668e-28	RBFOX2	22	35738736	36028425	-	10014	protein_coding	RNA binding fox-1 homolog 2 [Source:HGNC Symbol;Acc:HGNC:9906]	-
ENSG00000214485	1590.58	1465.05	1403.32	1482.39	3571.64	4535.47	3262.69	3808.08	1485.33	3794.47	-1.35289	9.29225e-30	3.72726e-28	RPL7P1	5	150094302	150095048	+	747	processed_pseudogene	ribosomal protein L7 pseudogene 1 [Source:HGNC Symbol;Acc:HGNC:10367]	-
ENSG00000273199	1.71306	2.55383	3.21126	2.52394	126.195	140.163	74.3861	118.036	2.50052	114.695	-5.51217	9.45092e-30	3.7841e-28	AP000692.2	21	36319792	36320670	-	879	antisense	novel transcript, antisense to MORC3	-
ENSG00000169914	338.33	373.711	277.774	310.444	73.1719	30.4128	75.5305	52.7149	325.065	57.9575	2.4757	9.8209e-30	3.92519e-28	OTUD3	1	19882513	19912945	+	6767	protein_coding	OTU deubiquitinase 3 [Source:HGNC Symbol;Acc:HGNC:29038]	-
ENSG00000143575	1081.8	875.964	945.716	963.302	2181.37	2729.22	2236.16	2533.75	966.695	2420.13	-1.32364	1.03301e-29	4.12132e-28	HAX1	1	154272511	154275875	+	2155	protein_coding	HCLS1 associated protein X-1 [Source:HGNC Symbol;Acc:HGNC:16915]	-
ENSG00000101109	1315.63	1498.25	1086.21	1196.35	457.059	280.326	392.53	328.895	1274.11	364.703	1.8022	1.03854e-29	4.13597e-28	STK4	20	44966474	45079959	+	9075	protein_coding	serine/threonine kinase 4 [Source:HGNC Symbol;Acc:HGNC:11408]	-
ENSG00000255198	18.8437	7.66149	9.63378	8.41312	119.832	124.296	98.4185	134.079	11.138	119.156	-3.42229	1.04729e-29	4.1634e-28	SNHG9	16	1964959	1965509	+	551	lincRNA	small nucleolar RNA host gene 9 [Source:HGNC Symbol;Acc:HGNC:33102]	-
ENSG00000198964	430.835	558.438	488.111	489.644	162.251	145.452	108.718	153.561	491.757	142.496	1.78626	1.08167e-29	4.2924e-28	SGMS1	10	50305586	50625163	-	6429	protein_coding	sphingomyelin synthase 1 [Source:HGNC Symbol;Acc:HGNC:29799]	-
ENSG00000165006	1016.7	982.374	785.153	974.239	347.832	313.384	374.219	340.355	939.617	343.947	1.44866	1.09997e-29	4.3573e-28	UBAP1	9	34179005	34252523	+	2772	protein_coding	ubiquitin associated protein 1 [Source:HGNC Symbol;Acc:HGNC:12461]	-
ENSG00000089280	2534.48	2190.34	2192.49	2279.96	5208.99	4550.01	5273.4	5160.33	2299.31	5048.18	-1.13476	1.13821e-29	4.4958e-28	FUS	16	31180110	31194871	+	10283	protein_coding	FUS RNA binding protein [Source:HGNC Symbol;Acc:HGNC:4010]	-
ENSG00000132522	72.8052	90.2354	90.7181	91.703	323.441	394.044	314.71	273.888	86.3654	326.521	-1.91646	1.13897e-29	4.4958e-28	GPS2	17	7311324	7315564	-	3089	protein_coding	G protein pathway suppressor 2 [Source:HGNC Symbol;Acc:HGNC:4550]	-
ENSG00000150457	628.694	517.576	406.224	470.293	138.921	124.296	152.205	136.371	505.697	137.948	1.87224	1.14994e-29	4.53108e-28	LATS2	13	20973032	21061547	-	5578	protein_coding	large tumor suppressor kinase 2 [Source:HGNC Symbol;Acc:HGNC:6515]	-
ENSG00000137154	9546.04	9490.89	8909.64	10394.4	22420.3	27300.1	20138	23583.1	9585.25	23360.4	-1.28514	1.17276e-29	4.61287e-28	RPS6	9	19375715	19380254	-	2714	protein_coding	ribosomal protein S6 [Source:HGNC Symbol;Acc:HGNC:10429]	-
ENSG00000105649	358.03	233.25	175.014	222.948	33.9348	11.9006	34.332	26.3575	247.31	26.6312	3.1985	1.24034e-29	4.8701e-28	RAB3A	19	18196784	18204074	-	1818	protein_coding	RAB3A, member RAS oncogene family [Source:HGNC Symbol;Acc:HGNC:9777]	-
ENSG00000126814	185.011	237.506	225.591	220.424	567.347	588.421	612.255	576.426	217.133	586.112	-1.43217	1.26172e-29	4.94533e-28	TRMT5	14	60971451	60981358	-	5692	protein_coding	tRNA methyltransferase 5 [Source:HGNC Symbol;Acc:HGNC:23141]	-
ENSG00000163960	1209.42	1641.26	1014.76	1246.82	380.706	194.377	304.411	237.217	1278.07	279.178	2.19175	1.27712e-29	4.9969e-28	UBXN7	3	196347662	196432474	-	11291	protein_coding	UBX domain protein 7 [Source:HGNC Symbol;Acc:HGNC:29119]	-
ENSG00000283635	13.7045	8.51277	14.4507	14.3023	96.5021	148.097	113.296	122.62	12.7426	120.129	-3.23147	1.35007e-29	5.27308e-28	AC012485.3	2	238289127	238300185	+	2424	antisense	novel transcript, antisense to PER2	-
ENSG00000185966	2.56959	0.851277	4.01407	4.20656	109.228	122.973	80.1081	100.846	2.91038	103.289	-5.13906	1.38599e-29	5.40391e-28	LCE3E	1	152565654	152566772	-	611	protein_coding	late cornified envelope 3E [Source:HGNC Symbol;Acc:HGNC:29463]	-
ENSG00000170791	274.09	326.89	323.534	305.396	850.491	810.566	708.384	802.184	307.478	792.906	-1.3665	1.41829e-29	5.52019e-28	CHCHD7	8	56211686	56218798	+	5866	protein_coding	coiled-coil-helix-coiled-coil-helix domain containing 7 [Source:HGNC Symbol;Acc:HGNC:28314]	-
ENSG00000148400	3327.62	3835.85	3401.53	3912.1	1057.28	1146.43	1590.72	1197.55	3619.28	1247.99	1.53606	1.43898e-29	5.59095e-28	NOTCH1	9	136494433	136545786	-	10377	protein_coding	notch 1 [Source:HGNC Symbol;Acc:HGNC:7881]	-
ENSG00000228300	249.251	151.527	248.873	248.187	718.993	794.699	1004.78	930.533	224.459	862.252	-1.94134	1.44285e-29	5.59624e-28	C19orf24	19	1275438	1279249	+	2193	protein_coding	chromosome 19 open reading frame 24 [Source:HGNC Symbol;Acc:HGNC:26073]	-
ENSG00000164180	348.608	366.049	268.943	280.998	89.0788	55.5364	58.3645	72.1965	316.15	68.794	2.19288	1.50414e-29	5.82384e-28	TMEM161B	5	88189633	88269476	-	9598	protein_coding	transmembrane protein 161B [Source:HGNC Symbol;Acc:HGNC:28483]	-
ENSG00000155918	195.289	152.379	123.633	158.167	528.11	818.5	597.377	564.967	157.367	627.239	-1.99436	1.59656e-29	6.17095e-28	RAET1L	6	150018334	150025532	-	1346	protein_coding	retinoic acid early transcript 1L [Source:HGNC Symbol;Acc:HGNC:16798]	-
ENSG00000184967	423.127	246.87	328.351	321.381	978.807	1178.16	1143.26	1081.8	329.932	1095.51	-1.73111	1.61472e-29	6.23036e-28	NOC4L	12	132144448	132152473	+	2029	protein_coding	nucleolar complex associated 4 homolog [Source:HGNC Symbol;Acc:HGNC:28461]	-
ENSG00000073737	23.9829	28.0921	21.676	29.4459	214.213	112.395	222.014	212.006	25.7992	190.157	-2.88604	1.62147e-29	6.24559e-28	DHRS9	2	169064789	169096167	+	3750	protein_coding	dehydrogenase/reductase 9 [Source:HGNC Symbol;Acc:HGNC:16888]	-
ENSG00000165322	571.306	729.544	534.675	607.427	200.427	113.717	147.628	169.605	610.738	157.844	1.94679	2.01539e-29	7.74952e-28	ARHGAP12	10	31805404	31928876	-	5938	protein_coding	Rho GTPase activating protein 12 [Source:HGNC Symbol;Acc:HGNC:16348]	-
ENSG00000140526	1471.52	1672.76	1310.19	1444.53	564.166	416.523	580.211	448.077	1474.75	502.244	1.55241	2.11278e-29	8.11004e-28	ABHD2	15	89087459	89202360	+	10345	protein_coding	abhydrolase domain containing 2 [Source:HGNC Symbol;Acc:HGNC:18717]	-
ENSG00000163041	1566.6	1527.19	1323.84	1579.14	3603.45	4232.66	3218.06	3720.99	1499.19	3693.79	-1.3008	2.33522e-29	8.94848e-28	H3F3A	1	226061851	226072001	+	3146	protein_coding	H3 histone family member 3A [Source:HGNC Symbol;Acc:HGNC:4764]	-
ENSG00000116604	1962.31	1751.93	1344.71	1655.7	498.417	368.92	588.222	522.565	1678.66	494.531	1.76173	2.34716e-29	8.9788e-28	MEF2D	1	156463727	156500828	-	6400	protein_coding	myocyte enhancer factor 2D [Source:HGNC Symbol;Acc:HGNC:6997]	SRF
ENSG00000164967	115.632	108.112	132.464	110.212	329.804	478.67	407.407	402.238	116.605	404.53	-1.79198	2.37094e-29	9.05422e-28	RPP25L	9	34610486	34612104	-	1092	protein_coding	ribonuclease P/MRP subunit p25 like [Source:HGNC Symbol;Acc:HGNC:19909]	-
ENSG00000116128	499.358	496.294	419.069	411.402	137.86	78.0154	124.74	129.495	456.531	117.528	1.95082	2.48426e-29	9.47077e-28	BCL9	1	147541412	147626216	+	6420	protein_coding	B cell CLL/lymphoma 9 [Source:HGNC Symbol;Acc:HGNC:1008]	-
ENSG00000013275	1077.52	789.134	1020.38	983.494	2258.78	3073.01	2759.15	2754.93	967.63	2711.47	-1.4862	3.09253e-29	1.17696e-27	PSMC4	19	39971005	39981441	+	2387	protein_coding	proteasome 26S subunit, ATPase 4 [Source:HGNC Symbol;Acc:HGNC:9551]	-
ENSG00000100628	0	1.70255	4.81689	5.88918	110.288	93.8829	175.093	92.8241	3.10216	118.022	-5.23682	3.13622e-29	1.19155e-27	ASB2	14	93934153	93976791	-	5040	protein_coding	ankyrin repeat and SOCS box containing 2 [Source:HGNC Symbol;Acc:HGNC:16012]	-
ENSG00000041988	381.156	326.89	327.548	367.653	118.772	92.5606	105.285	106.576	350.812	105.798	1.72519	3.45465e-29	1.3103e-27	THAP3	1	6624866	6635586	+	4072	protein_coding	THAP domain containing 3 [Source:HGNC Symbol;Acc:HGNC:20855]	THAP
ENSG00000140396	169.593	170.255	165.38	172.469	37.1162	34.3796	30.8988	27.5034	169.424	32.4745	2.38256	3.53322e-29	1.33783e-27	NCOA2	8	70109762	70403805	-	10026	protein_coding	nuclear receptor coactivator 2 [Source:HGNC Symbol;Acc:HGNC:7669]	-
ENSG00000149639	2226.98	2341.01	2122.64	2522.25	675.514	400.655	803.37	550.069	2303.22	607.402	1.92149	3.55016e-29	1.34196e-27	SOGA1	20	36777442	36863686	-	15128	protein_coding	suppressor of glucose, autophagy associated 1 [Source:HGNC Symbol;Acc:HGNC:16111]	-
ENSG00000161960	710.065	657.186	413.45	571.251	123.014	128.263	172.805	118.036	587.988	135.529	2.11676	3.8615e-29	1.45718e-27	EIF4A1	17	7572706	7579005	+	5316	protein_coding	eukaryotic translation initiation factor 4A1 [Source:HGNC Symbol;Acc:HGNC:3282]	-
ENSG00000264522	733.191	990.886	644.66	874.965	191.944	117.684	235.747	186.794	810.926	183.042	2.14383	3.99721e-29	1.50584e-27	OTUD7B	1	149937812	150010676	-	12177	protein_coding	OTU deubiquitinase 7B [Source:HGNC Symbol;Acc:HGNC:16683]	-
ENSG00000182899	7012.42	6734.45	5504.1	7351.38	16477.5	19339.9	15044.3	17390.2	6650.59	17063	-1.3593	4.53397e-29	1.70517e-27	RPL35A	3	197949980	197956610	+	3109	protein_coding	ribosomal protein L35a [Source:HGNC Symbol;Acc:HGNC:10345]	-
ENSG00000143442	766.596	921.082	798.801	832.899	290.567	190.41	264.357	301.392	829.844	261.681	1.66161	4.92355e-29	1.84857e-27	POGZ	1	151402724	151459465	-	10272	protein_coding	pogo transposable element derived with ZNF domain [Source:HGNC Symbol;Acc:HGNC:18801]	-
ENSG00000160271	434.261	452.879	472.858	459.356	126.195	96.5275	169.371	116.89	454.839	127.246	1.8339	4.96587e-29	1.86132e-27	RALGDS	9	133097720	133149334	-	7584	protein_coding	ral guanine nucleotide dissociation stimulator [Source:HGNC Symbol;Acc:HGNC:9842]	-
ENSG00000111678	510.493	423.085	541.9	496.374	1260.89	2013.85	1452.25	1590.62	492.963	1579.4	-1.67896	5.00027e-29	1.87107e-27	C12orf57	12	6942978	6946003	+	1806	protein_coding	chromosome 12 open reading frame 57 [Source:HGNC Symbol;Acc:HGNC:29521]	-
ENSG00000107968	1132.33	1163.7	671.153	1075.2	295.869	238.013	273.512	260.137	1010.6	266.883	1.91944	5.15166e-29	1.92449e-27	MAP3K8	10	30433937	30461833	+	3601	protein_coding	mitogen-activated protein kinase kinase kinase 8 [Source:HGNC Symbol;Acc:HGNC:6860]	-
ENSG00000204304	1441.54	1333.95	1099.86	1230	449.636	277.682	370.786	436.617	1276.34	383.68	1.7315	5.61037e-29	2.09235e-27	PBX2	6	32184741	32190186	-	4344	protein_coding	PBX homeobox 2 [Source:HGNC Symbol;Acc:HGNC:8633]	Homeobox
ENSG00000161677	274.947	241.763	280.182	312.127	709.449	1051.22	803.37	912.198	277.255	869.06	-1.64705	5.71207e-29	2.12672e-27	JOSD2	19	50505998	50511353	-	1514	protein_coding	Josephin domain containing 2 [Source:HGNC Symbol;Acc:HGNC:28853]	-
ENSG00000074800	39134.1	33525	34154.2	36853.7	75890.9	108488	88906.2	93085.4	35916.7	91592.5	-1.35056	5.83395e-29	2.16848e-27	ENO1	1	8861000	8879250	-	5276	protein_coding	enolase 1 [Source:HGNC Symbol;Acc:HGNC:3350]	-
ENSG00000196369	283.512	326.039	280.985	253.235	75.2928	76.6931	83.5413	59.5908	285.943	73.7795	1.95495	6.15118e-29	2.28259e-27	SRGAP2B	1	144887265	145095528	-	7230	protein_coding	SLIT-ROBO Rho GTPase activating protein 2B [Source:HGNC Symbol;Acc:HGNC:35237]	-
ENSG00000089195	225.268	238.358	256.901	251.552	961.839	584.454	976.174	976.372	243.02	874.71	-1.84863	6.27611e-29	2.32508e-27	TRMT6	20	5937235	5950558	-	3776	protein_coding	tRNA methyltransferase 6 [Source:HGNC Symbol;Acc:HGNC:20900]	-
ENSG00000127585	611.563	442.664	465.633	530.868	147.404	161.32	169.371	127.203	512.682	151.325	1.76143	6.40381e-29	2.36845e-27	FBXL16	16	692498	705829	-	3989	protein_coding	F-box and leucine rich repeat protein 16 [Source:HGNC Symbol;Acc:HGNC:14150]	-
ENSG00000197971	1017.56	1239.46	1123.94	1114.74	501.599	419.167	446.316	461.829	1123.92	457.228	1.29628	6.59463e-29	2.43419e-27	MBP	18	76978827	77133683	-	18615	protein_coding	myelin basic protein [Source:HGNC Symbol;Acc:HGNC:6925]	-
ENSG00000132507	10660.4	8316.98	8733.02	9582.54	20291.9	21353.7	20223.9	21481.3	9323.23	20837.7	-1.1603	6.60338e-29	2.43419e-27	EIF5A	17	7306999	7312463	+	2815	protein_coding	eukaryotic translation initiation factor 5A [Source:HGNC Symbol;Acc:HGNC:3300]	-
ENSG00000171863	5307.93	4947.62	4672.38	4796.32	11938.7	15099.3	10535.4	12566.8	4931.06	12535	-1.34593	6.77789e-29	2.4944e-27	RPS7	2	3575205	3580920	+	5584	protein_coding	ribosomal protein S7 [Source:HGNC Symbol;Acc:HGNC:10440]	-
ENSG00000070159	950.75	955.133	1041.25	834.582	409.338	329.251	354.764	347.231	945.429	360.146	1.39083	7.34219e-29	2.69762e-27	PTPN3	9	109375466	109498313	-	9995	protein_coding	protein tyrosine phosphatase, non-receptor type 3 [Source:HGNC Symbol;Acc:HGNC:9655]	-
ENSG00000198909	434.261	412.018	431.914	428.228	138.921	148.097	156.783	163.875	426.605	151.919	1.49003	7.38934e-29	2.71048e-27	MAP3K3	17	63622415	63696303	+	6107	protein_coding	mitogen-activated protein kinase kinase kinase 3 [Source:HGNC Symbol;Acc:HGNC:6855]	-
ENSG00000230551	256.103	350.726	174.211	251.552	46.6603	40.9911	30.8988	41.2552	258.148	39.9514	2.69001	7.50904e-29	2.74986e-27	AC021078.1	5	149494314	149504670	-	8636	processed_transcript	novel transcript	-
ENSG00000020129	465.097	421.382	451.985	461.88	953.355	1078.99	1185.6	1111.6	450.086	1082.39	-1.26566	7.81071e-29	2.85565e-27	NCDN	1	35557473	35567274	+	4917	protein_coding	neurochondrin [Source:HGNC Symbol;Acc:HGNC:17597]	-
ENSG00000134884	2539.62	2718.13	1816.77	2105.8	707.328	569.909	844.568	633.725	2295.08	688.883	1.73542	7.84377e-29	2.86304e-27	ARGLU1	13	106541673	106568164	-	5810	protein_coding	arginine and glutamate rich 1 [Source:HGNC Symbol;Acc:HGNC:25482]	-
ENSG00000112343	668.095	817.226	533.872	631.825	148.465	87.2714	156.783	185.648	662.754	144.542	2.1925	8.01099e-29	2.9193e-27	TRIM38	6	25962802	25991226	+	9413	protein_coding	tripartite motif containing 38 [Source:HGNC Symbol;Acc:HGNC:10059]	-
ENSG00000179958	551.606	500.551	548.323	509.835	1164.39	1238.99	1102.06	1237.66	527.579	1185.77	-1.168	8.15653e-29	2.96749e-27	DCTPP1	16	30423619	30430075	-	1581	protein_coding	dCTP pyrophosphatase 1 [Source:HGNC Symbol;Acc:HGNC:28777]	-
ENSG00000116521	1187.15	958.538	1012.35	1106.33	2285.3	2947.39	2674.47	2931.41	1066.09	2709.64	-1.34556	8.65862e-29	3.14376e-27	SCAMP3	1	155255979	155262430	-	2442	protein_coding	secretory carrier membrane protein 3 [Source:HGNC Symbol;Acc:HGNC:10565]	-
ENSG00000204618	893.362	947.471	521.027	931.332	161.19	219.501	207.137	161.583	823.298	187.353	2.13755	8.66925e-29	3.14376e-27	RNF39	6	30070266	30075887	-	2206	protein_coding	ring finger protein 39 [Source:HGNC Symbol;Acc:HGNC:18064]	-
ENSG00000197442	327.195	329.444	315.506	318.016	88.0184	116.362	82.3969	73.3425	322.54	90.0299	1.84747	9.21085e-29	3.33475e-27	MAP3K5	6	136557047	136792518	-	5303	protein_coding	mitogen-activated protein kinase kinase kinase 5 [Source:HGNC Symbol;Acc:HGNC:6857]	-
ENSG00000163516	1990.58	1738.31	1567.09	1675.89	723.235	739.162	676.341	771.242	1742.97	727.495	1.26056	9.27432e-29	3.35115e-27	ANKZF1	2	219229757	219236669	+	6119	protein_coding	ankyrin repeat and zinc finger domain containing 1 [Source:HGNC Symbol;Acc:HGNC:25527]	-
ENSG00000128185	543.041	416.274	557.956	548.535	1392.39	2009.89	1448.81	1553.94	516.452	1601.26	-1.63173	9.28621e-29	3.35115e-27	DGCR6L	22	20314276	20320080	-	1154	protein_coding	DiGeorge syndrome critical region gene 6 like [Source:HGNC Symbol;Acc:HGNC:18551]	-
ENSG00000120063	1149.47	1234.35	784.35	1022.19	243.906	108.428	254.057	208.568	1047.59	203.74	2.35835	9.3381e-29	3.36443e-27	GNA13	17	65010715	65056839	-	5104	protein_coding	G protein subunit alpha 13 [Source:HGNC Symbol;Acc:HGNC:4381]	-
ENSG00000047056	608.137	651.227	653.491	685.669	217.395	125.618	203.703	210.86	649.631	189.394	1.77326	1.02167e-28	3.67504e-27	WDR37	10	1049538	1132384	+	6000	protein_coding	WD repeat domain 37 [Source:HGNC Symbol;Acc:HGNC:31406]	-
ENSG00000107223	3510.07	2981.17	2967.2	3617.64	7023.44	8772.1	7613.7	8312.92	3269.02	7930.54	-1.27849	1.20774e-28	4.33735e-27	EDF1	9	136862119	136866286	-	1200	protein_coding	endothelial differentiation related factor 1 [Source:HGNC Symbol;Acc:HGNC:3164]	-
ENSG00000235027	408.565	340.511	150.929	336.525	40.2976	35.7019	41.1984	35.5253	309.133	38.1808	3.015	1.3506e-28	4.84263e-27	AC068580.3	11	1760348	1762486	+	2015	antisense	novel transcript	-
ENSG00000123416	2663.81	2763.25	3472.98	3122.95	6582.29	8987.63	9170.09	8901.95	3005.75	8410.49	-1.48433	1.38929e-28	4.97334e-27	TUBA1B	12	49127782	49131397	-	3574	protein_coding	tubulin alpha 1b [Source:HGNC Symbol;Acc:HGNC:18809]	-
ENSG00000171681	896.788	944.066	700.055	808.501	325.562	234.046	227.736	223.465	837.353	252.702	1.72608	1.57846e-28	5.64147e-27	ATF7IP	12	14365632	14502935	+	13189	protein_coding	activating transcription factor 7 interacting protein [Source:HGNC Symbol;Acc:HGNC:20092]	-
ENSG00000115268	9492.94	7971.36	8400.66	9320.9	20343.9	32843.1	24742	25040.7	8796.46	25742.4	-1.54911	1.59644e-28	5.69662e-27	RPS15	19	1438358	1440494	+	2137	protein_coding	ribosomal protein S15 [Source:HGNC Symbol;Acc:HGNC:10388]	-
ENSG00000162599	197.859	261.342	232.816	225.472	47.7208	47.6026	61.7977	53.8609	229.372	52.7455	2.11943	1.67412e-28	5.96425e-27	NFIA	1	60865259	61462793	+	10872	protein_coding	nuclear factor I A [Source:HGNC Symbol;Acc:HGNC:7784]	CTF/NFI
ENSG00000171940	1204.28	1473.56	867.04	1171.11	358.436	342.474	389.096	330.041	1179	355.012	1.73115	1.94756e-28	6.92734e-27	ZNF217	20	53567065	53609907	-	6181	protein_coding	zinc finger protein 217 [Source:HGNC Symbol;Acc:HGNC:13009]	zf-C2H2
ENSG00000163156	443.683	424.787	412.647	447.578	924.723	973.209	953.286	1045.13	432.174	974.087	-1.17244	2.08936e-28	7.41989e-27	SCNM1	1	151156664	151170297	+	3265	protein_coding	sodium channel modifier 1 [Source:HGNC Symbol;Acc:HGNC:23136]	-
ENSG00000141759	925.054	811.267	1013.96	1024.72	2217.43	2214.84	2051.91	2223.2	943.749	2176.84	-1.20559	2.29852e-28	8.14969e-27	TXNL4A	18	79970811	80033949	-	5231	protein_coding	thioredoxin like 4A [Source:HGNC Symbol;Acc:HGNC:30551]	-
ENSG00000078747	1640.26	2088.18	1686.71	1755.82	804.891	678.337	670.619	655.499	1792.74	702.336	1.35126	2.42763e-28	8.5938e-27	ITCH	20	34363235	34511393	+	6664	protein_coding	itchy E3 ubiquitin protein ligase [Source:HGNC Symbol;Acc:HGNC:13890]	-
ENSG00000134250	1161.46	1608.91	1292.53	1290.57	547.198	439.002	484.082	458.391	1338.37	482.168	1.47171	2.45909e-28	8.69137e-27	NOTCH2	1	119911553	120069626	-	16807	protein_coding	notch 2 [Source:HGNC Symbol;Acc:HGNC:7882]	-
ENSG00000146112	5758.46	5285.58	4182.67	5251.47	2033.97	2180.46	2183.52	2079.95	5119.54	2119.47	1.27237	2.5265e-28	8.91551e-27	PPP1R18	6	30676389	30687895	-	4599	protein_coding	protein phosphatase 1 regulatory subunit 18 [Source:HGNC Symbol;Acc:HGNC:29413]	-
ENSG00000105327	1199.14	903.205	622.182	1065.94	168.613	260.492	228.88	183.356	947.618	210.335	2.17397	2.61571e-28	9.21571e-27	BBC3	19	47220822	47232766	-	3180	protein_coding	BCL2 binding component 3 [Source:HGNC Symbol;Acc:HGNC:17868]	-
ENSG00000171723	454.818	422.233	410.238	389.527	116.651	150.742	99.5629	139.809	419.204	126.691	1.7304	2.70006e-28	9.49792e-27	GPHN	14	66507407	67181803	+	6007	protein_coding	gephyrin [Source:HGNC Symbol;Acc:HGNC:15465]	-
ENSG00000137478	716.917	803.605	599.703	711.75	261.934	267.103	217.436	213.152	707.994	239.906	1.56187	2.78184e-28	9.77016e-27	FCHSD2	11	72836745	73142261	-	5188	protein_coding	FCH and double SH3 domains 2 [Source:HGNC Symbol;Acc:HGNC:29114]	-
ENSG00000172493	290.364	404.357	272.154	286.046	84.837	55.5364	68.6641	71.0506	313.23	70.022	2.15478	2.91829e-28	1.02333e-26	AFF1	4	86935002	87141054	+	10733	protein_coding	AF4/FMR2 family member 1 [Source:HGNC Symbol;Acc:HGNC:7135]	AF-4
ENSG00000116273	1910.92	1694.04	1040.45	1543.81	331.925	162.642	360.486	325.457	1547.3	295.128	2.38792	3.10666e-28	1.08767e-26	PHF13	1	6613685	6624033	+	3681	protein_coding	PHD finger protein 13 [Source:HGNC Symbol;Acc:HGNC:22983]	-
ENSG00000107882	310.921	346.47	350.027	306.238	97.5625	85.9491	97.2741	114.598	328.414	98.8459	1.72976	3.16889e-28	1.10772e-26	SUFU	10	102503987	102633535	+	6865	protein_coding	SUFU negative regulator of hedgehog signaling [Source:HGNC Symbol;Acc:HGNC:16466]	-
ENSG00000117394	4581.59	4476.01	3806.15	4864.47	1667.05	1482.29	1912.29	1913.78	4432.05	1743.85	1.34534	3.23018e-28	1.12738e-26	SLC2A1	1	42925375	42959176	-	4724	protein_coding	solute carrier family 2 member 1 [Source:HGNC Symbol;Acc:HGNC:11005]	-
ENSG00000198727	18183.3	23985.6	27657	25067.7	58947.9	70123.9	62104.4	67753.6	23723.4	64732.4	-1.44816	3.46462e-28	1.20731e-26	MT-CYB	MT	14747	15887	+	1141	protein_coding	mitochondrially encoded cytochrome b [Source:HGNC Symbol;Acc:HGNC:7427]	-
ENSG00000172803	11.1349	16.1743	17.6619	24.398	110.288	145.452	177.382	127.203	17.3423	140.082	-3.01115	3.78283e-28	1.31614e-26	SNX32	11	65833641	65856896	+	3966	protein_coding	sorting nexin 32 [Source:HGNC Symbol;Acc:HGNC:26423]	-
ENSG00000140365	883.94	692.088	883.096	894.315	1910.95	2660.46	2293.38	2612.83	838.36	2369.4	-1.49848	4.12383e-28	1.43255e-26	COMMD4	15	75335891	75343224	+	6779	protein_coding	COMM domain containing 4 [Source:HGNC Symbol;Acc:HGNC:26027]	-
ENSG00000141642	6.85225	14.4717	21.676	16.8262	143.162	122.973	127.029	114.598	14.9566	126.94	-3.07987	4.13038e-28	1.43259e-26	ELAC1	18	50967991	50988121	+	3970	protein_coding	elaC ribonuclease Z 1 [Source:HGNC Symbol;Acc:HGNC:14197]	-
ENSG00000243364	513.919	445.218	460.013	452.626	134.679	52.8918	98.4185	113.452	467.944	99.8602	2.2193	4.23095e-28	1.4652e-26	EFNA4	1	155063731	155069553	+	1263	protein_coding	ephrin A4 [Source:HGNC Symbol;Acc:HGNC:3224]	-
ENSG00000213593	924.197	862.344	863.829	823.644	1854.75	2205.59	1799	2091.41	868.504	1987.69	-1.19412	4.33911e-28	1.50032e-26	TMX2	11	57712600	57740973	+	2246	protein_coding	thioredoxin related transmembrane protein 2 [Source:HGNC Symbol;Acc:HGNC:30739]	-
ENSG00000177125	426.553	509.064	307.478	410.56	82.716	44.958	105.285	79.0724	413.414	78.0078	2.39875	4.68226e-28	1.61647e-26	ZBTB34	9	126860665	126885878	+	6606	protein_coding	zinc finger and BTB domain containing 34 [Source:HGNC Symbol;Acc:HGNC:31446]	ZBTB
ENSG00000125629	415.418	446.069	321.126	397.941	101.804	43.6357	78.9637	96.2621	395.138	80.1665	2.29164	4.90717e-28	1.69149e-26	INSIG2	2	118088452	118110997	+	3950	protein_coding	insulin induced gene 2 [Source:HGNC Symbol;Acc:HGNC:20452]	-
ENSG00000131791	1329.34	1388.43	1046.87	1174.47	448.575	245.947	347.898	356.399	1234.78	349.705	1.81712	4.95968e-28	1.70696e-26	PRKAB2	1	147155106	147172550	-	5460	protein_coding	protein kinase AMP-activated non-catalytic subunit beta 2 [Source:HGNC Symbol;Acc:HGNC:9379]	-
ENSG00000132591	824.84	758.488	779.533	789.992	1551.46	1884.27	1954.64	1904.61	788.213	1823.74	-1.20995	5.20442e-28	1.78843e-26	ERAL1	17	28854938	28861067	+	2318	protein_coding	Era like 12S mitochondrial rRNA chaperone 1 [Source:HGNC Symbol;Acc:HGNC:3424]	-
ENSG00000107771	657.816	762.744	532.266	652.858	232.241	207.6	180.815	218.882	651.421	209.885	1.63293	5.43944e-28	1.86631e-26	CCSER2	10	84328558	84518521	+	8452	protein_coding	coiled-coil serine rich protein 2 [Source:HGNC Symbol;Acc:HGNC:29197]	-
ENSG00000124172	1725.05	1542.51	1455.5	2096.55	4407.28	5131.82	4261.75	5457.14	1704.91	4814.5	-1.49767	5.47419e-28	1.87535e-26	ATP5F1E	20	59025467	59032382	-	5126	protein_coding	ATP synthase F1 subunit epsilon [Source:HGNC Symbol;Acc:HGNC:838]	-
ENSG00000168028	11392.7	9839.06	10707.9	10937.1	23121.3	35568.4	27181.8	30761.5	10719.2	29158.2	-1.44366	5.62724e-28	1.92483e-26	RPSA	3	39406689	39412542	+	3936	protein_coding	ribosomal protein SA [Source:HGNC Symbol;Acc:HGNC:6502]	-
ENSG00000125691	14969.6	13824.7	12752.7	15775.4	31493.6	38912.5	30731.8	36167	14330.6	34326.2	-1.26019	5.63739e-28	1.92535e-26	RPL23	17	38847865	38853843	-	5979	protein_coding	ribosomal protein L23 [Source:HGNC Symbol;Acc:HGNC:10316]	-
ENSG00000155324	899.358	791.688	617.365	715.957	232.241	183.799	248.335	260.137	756.092	231.128	1.70743	5.98798e-28	2.04195e-26	GRAMD2B	5	126360132	126496494	+	5051	protein_coding	GRAM domain containing 2B [Source:HGNC Symbol;Acc:HGNC:24911]	-
ENSG00000153046	513.919	546.52	511.393	482.072	195.125	133.552	186.537	169.605	513.476	171.205	1.5799	6.3476e-28	2.16128e-26	CDYL	6	4706159	4955551	+	4531	protein_coding	chromodomain Y like [Source:HGNC Symbol;Acc:HGNC:1811]	-
ENSG00000165997	1072.38	1139.86	574.013	811.866	246.027	171.898	161.361	171.897	899.529	187.796	2.25798	6.46913e-28	2.19931e-26	ARL5B	10	18659405	18681639	+	7196	protein_coding	ADP ribosylation factor like GTPase 5B [Source:HGNC Symbol;Acc:HGNC:23052]	-
ENSG00000158321	631.264	698.047	666.336	682.304	191.944	78.0154	160.216	170.751	669.488	150.231	2.14952	6.68022e-28	2.26761e-26	AUTS2	7	69598296	70793495	+	24197	protein_coding	AUTS2, activator of transcription and developmental regulator [Source:HGNC Symbol;Acc:HGNC:14262]	-
ENSG00000110395	1381.59	1722.13	1369.6	1367.13	638.398	532.885	550.457	577.572	1460.11	574.828	1.3439	6.95288e-28	2.35658e-26	CBL	11	119206276	119313926	+	11740	protein_coding	Cbl proto-oncogene [Source:HGNC Symbol;Acc:HGNC:1541]	-
ENSG00000118263	1013.28	1396.95	1052.49	1210.65	413.58	235.368	339.887	334.625	1168.34	330.865	1.8173	7.03467e-28	2.38069e-26	KLF7	2	207074137	207167267	-	9262	protein_coding	Kruppel like factor 7 [Source:HGNC Symbol;Acc:HGNC:6350]	zf-C2H2
ENSG00000172273	693.79	624.837	580.435	640.238	230.12	230.079	256.346	262.429	634.825	244.744	1.37446	7.29583e-28	2.46533e-26	HINFP	11	119121587	119136044	+	9836	protein_coding	histone H4 transcription factor [Source:HGNC Symbol;Acc:HGNC:17850]	zf-C2H2
ENSG00000139318	357.174	675.914	670.35	681.463	2061.54	2918.3	2614.96	2185.38	596.225	2445.04	-2.03555	7.59711e-28	2.56325e-26	DUSP6	12	89347232	89353271	-	4632	protein_coding	dual specificity phosphatase 6 [Source:HGNC Symbol;Acc:HGNC:3072]	-
ENSG00000169567	1773.88	1764.7	1572.71	1902.21	3670.26	4749.68	3960.77	4504.84	1753.37	4221.39	-1.26743	7.92492e-28	2.66981e-26	HINT1	5	131159027	131171735	-	1936	protein_coding	histidine triad nucleotide binding protein 1 [Source:HGNC Symbol;Acc:HGNC:4912]	-
ENSG00000197858	1500.64	1085.38	1527.76	1263.65	3329.85	5212.48	4468.89	4057.9	1344.36	4267.28	-1.66612	8.34563e-28	2.8073e-26	GPAA1	8	144082590	144086216	+	3268	protein_coding	glycosylphosphatidylinositol anchor attachment 1 [Source:HGNC Symbol;Acc:HGNC:4446]	-
ENSG00000227097	7967.46	7151.58	6972.45	8851.44	16505	21499.2	18466.1	19538.9	7735.73	19002.3	-1.29653	8.46323e-28	2.84258e-26	RPS28P7	11	82689559	82689768	+	210	processed_pseudogene	ribosomal protein S28 pseudogene 7 [Source:HGNC Symbol;Acc:HGNC:35787]	-
ENSG00000142168	1104.93	1119.43	1179.34	1216.54	2338.32	2841.61	2411.25	2537.19	1155.06	2532.09	-1.13192	8.92108e-28	2.99185e-26	SOD1	21	31659622	31668931	+	2019	protein_coding	superoxide dismutase 1 [Source:HGNC Symbol;Acc:HGNC:11179]	-
ENSG00000110104	340.043	285.178	339.591	278.474	893.97	776.187	1144.4	1157.44	310.821	992.999	-1.67605	9.43671e-28	3.16002e-26	CCDC86	11	60842071	60851081	+	3384	protein_coding	coiled-coil domain containing 86 [Source:HGNC Symbol;Acc:HGNC:28359]	-
ENSG00000147123	962.741	744.016	874.265	965.826	2369.07	3617.8	2362.04	2800.77	886.712	2787.42	-1.65201	9.49008e-28	3.17313e-26	NDUFB11	X	47142216	47145504	-	1418	protein_coding	NADH:ubiquinone oxidoreductase subunit B11 [Source:HGNC Symbol;Acc:HGNC:20372]	-
ENSG00000141503	10497.6	10008.5	9394.54	10097.4	4344.71	4444.23	5314.6	4478.48	9999.52	4645.51	1.10599	9.7565e-28	3.25733e-26	MINK1	17	4833388	4898061	+	7817	protein_coding	misshapen like kinase 1 [Source:HGNC Symbol;Acc:HGNC:17565]	-
ENSG00000172765	338.33	394.993	346.816	399.623	123.014	63.4701	96.1297	84.8023	369.94	91.8539	2.00125	1.0494e-27	3.49832e-26	TMCC1	3	129647792	129893606	-	8138	protein_coding	transmembrane and coiled-coil domain family 1 [Source:HGNC Symbol;Acc:HGNC:29116]	-
ENSG00000158458	98.5011	194.091	157.352	212.852	12.7255	17.1898	19.4548	14.8977	165.699	16.067	3.37189	1.10448e-27	3.67644e-26	NRG2	5	139846779	140043299	-	4520	protein_coding	neuregulin 2 [Source:HGNC Symbol;Acc:HGNC:7998]	-
ENSG00000170581	1263.38	1200.3	1135.18	1198.03	580.073	526.273	559.612	519.128	1199.22	546.271	1.13362	1.13674e-27	3.77818e-26	STAT2	12	56341597	56360155	-	6109	protein_coding	signal transducer and activator of transcription 2 [Source:HGNC Symbol;Acc:HGNC:11363]	STAT
ENSG00000163932	444.54	390.736	431.914	414.767	152.707	149.419	144.195	160.437	420.489	151.689	1.47065	1.15107e-27	3.8201e-26	PRKCD	3	53156009	53192717	+	3396	protein_coding	protein kinase C delta [Source:HGNC Symbol;Acc:HGNC:9399]	-
ENSG00000112624	156.745	183.876	157.352	171.628	36.0557	14.5452	30.8988	25.2115	167.4	26.6778	2.63049	1.15636e-27	3.83197e-26	BICRAL	6	42746958	42868560	+	6843	protein_coding	BRD4 interacting chromatin remodeling complex associated protein like [Source:HGNC Symbol;Acc:HGNC:21111]	-
ENSG00000159377	3940.04	2957.34	3358.17	3440.12	7592.91	11144.3	9182.68	9851.96	3423.92	9442.96	-1.46349	1.20883e-27	3.99991e-26	PSMB4	1	151399534	151401944	+	2158	protein_coding	proteasome subunit beta 4 [Source:HGNC Symbol;Acc:HGNC:9541]	-
ENSG00000151332	333.191	410.316	301.858	314.651	88.0184	55.5364	88.1189	97.408	340.004	82.2704	2.04012	1.2821e-27	4.23605e-26	MBIP	14	36298558	36320676	-	3468	protein_coding	MAP3K12 binding inhibitory protein 1 [Source:HGNC Symbol;Acc:HGNC:20427]	-
ENSG00000275215	0	0	0	0.841312	499.478	806.599	739.283	505.376	0.210328	637.684	-11.2924	1.3362e-27	4.40826e-26	RNA5-8SN2	21	8395607	8395759	+	153	rRNA	RNA, 5.8S ribosomal N2 [Source:HGNC Symbol;Acc:HGNC:53521]	-
ENSG00000087191	1698.5	1422.48	1508.49	1613.64	3128.36	3706.39	3495	3857.36	1560.78	3546.78	-1.18412	1.4561e-27	4.79675e-26	PSMC5	17	63827152	63832026	+	4490	protein_coding	proteasome 26S subunit, ATPase 5 [Source:HGNC Symbol;Acc:HGNC:9552]	-
ENSG00000178035	4243.26	3511.52	3504.29	3723.65	7670.32	10253.1	9048.78	9395.86	3745.68	9092.01	-1.27929	1.46951e-27	4.83378e-26	IMPDH2	3	49024325	49029408	-	2773	protein_coding	inosine monophosphate dehydrogenase 2 [Source:HGNC Symbol;Acc:HGNC:6053]	-
ENSG00000174307	5120.34	4057.19	3811.77	5110.97	1431.62	843.624	1433.93	1396.95	4525.07	1276.53	1.82497	1.51094e-27	4.96273e-26	PHLDA3	1	201464383	201469237	-	3138	protein_coding	pleckstrin homology like domain family A member 3 [Source:HGNC Symbol;Acc:HGNC:8934]	-
ENSG00000114021	828.266	780.621	799.604	758.022	1762.49	2032.37	1599.87	1792.31	791.628	1796.76	-1.18206	1.58471e-27	5.19738e-26	NIT2	3	100334701	100361635	+	9264	protein_coding	nitrilase family member 2 [Source:HGNC Symbol;Acc:HGNC:29878]	-
ENSG00000172590	631.264	525.238	483.295	555.266	1347.85	1506.09	1227.94	1464.56	548.766	1386.61	-1.33726	1.58928e-27	5.20471e-26	MRPL52	14	22829879	22835037	+	3213	protein_coding	mitochondrial ribosomal protein L52 [Source:HGNC Symbol;Acc:HGNC:16655]	-
ENSG00000118922	202.141	274.111	172.605	205.28	48.7813	25.1236	32.0432	36.6713	213.534	35.6548	2.5698	1.60598e-27	5.25171e-26	KLF12	13	73686089	73995056	-	10923	protein_coding	Kruppel like factor 12 [Source:HGNC Symbol;Acc:HGNC:6346]	zf-C2H2
ENSG00000081923	1213.71	1573.16	1135.98	1364.61	487.813	498.505	449.75	364.421	1321.86	450.122	1.55454	1.61483e-27	5.27292e-26	ATP8B1	18	57646426	57803315	-	7028	protein_coding	ATPase phospholipid transporting 8B1 [Source:HGNC Symbol;Acc:HGNC:3706]	-
ENSG00000115966	543.897	590.786	443.154	507.311	198.306	152.064	143.05	155.853	521.287	162.318	1.68039	1.6311e-27	5.31824e-26	ATF2	2	175072250	175168382	-	5751	protein_coding	activating transcription factor 2 [Source:HGNC Symbol;Acc:HGNC:784]	TF_bZIP
ENSG00000108091	1880.94	2174.16	1864.94	1870.24	934.267	813.211	756.449	853.753	1947.57	839.42	1.21365	1.67212e-27	5.44404e-26	CCDC6	10	59788763	59906656	-	7345	protein_coding	coiled-coil domain containing 6 [Source:HGNC Symbol;Acc:HGNC:18782]	-
ENSG00000275832	9007.28	9041.41	8906.43	9806.33	4369.1	3303.09	4300.66	3672.86	9190.36	3911.43	1.23215	1.75197e-27	5.69571e-26	ARHGAP23	17	38419280	38512392	+	8133	protein_coding	Rho GTPase activating protein 23 [Source:HGNC Symbol;Acc:HGNC:29293]	-
ENSG00000163382	1726.77	1375.66	1498.05	1539.6	3225.93	4374.15	3795.98	3932.99	1535.02	3832.26	-1.31971	1.86672e-27	6.0599e-26	NAXE	1	156591762	156594299	+	1933	protein_coding	NAD(P)HX epimerase [Source:HGNC Symbol;Acc:HGNC:18453]	-
ENSG00000137845	2579.87	2926.69	2039.15	2466.73	1054.1	815.855	920.099	861.775	2503.11	912.957	1.45431	1.8954e-27	6.14407e-26	ADAM10	15	58588807	58749978	-	16168	protein_coding	ADAM metallopeptidase domain 10 [Source:HGNC Symbol;Acc:HGNC:188]	-
ENSG00000196449	253.533	209.414	213.549	215.376	550.38	706.105	590.511	601.638	222.968	612.158	-1.45607	1.99857e-27	6.46911e-26	YRDC	1	37802944	37808185	-	1826	protein_coding	yrdC N6-threonylcarbamoyltransferase domain containing [Source:HGNC Symbol;Acc:HGNC:28905]	-
ENSG00000130255	5078.37	4173.81	4551.96	5271.66	11496.5	15462.9	11018.3	12653.9	4768.95	12657.9	-1.40822	2.01501e-27	6.51286e-26	RPL36	19	5674947	5691876	+	2272	protein_coding	ribosomal protein L36 [Source:HGNC Symbol;Acc:HGNC:13631]	-
ENSG00000175931	1341.33	1216.47	1186.56	1279.64	342.529	163.964	357.053	351.815	1256	303.84	2.0444	2.30653e-27	7.42926e-26	UBE2O	17	76389451	76453206	-	6472	protein_coding	ubiquitin conjugating enzyme E2 O [Source:HGNC Symbol;Acc:HGNC:29554]	-
ENSG00000089356	529.336	448.623	413.45	547.694	148.465	173.221	160.216	136.371	484.776	154.568	1.65106	2.30791e-27	7.42926e-26	FXYD3	19	35115879	35124324	+	3334	protein_coding	FXYD domain containing ion transport regulator 3 [Source:HGNC Symbol;Acc:HGNC:4027]	-
ENSG00000139926	2078.8	2574.26	1722.84	2177.32	637.338	308.095	574.489	551.215	2138.3	517.784	2.0442	2.30853e-27	7.42926e-26	FRMD6	14	51489100	51730727	+	9416	protein_coding	FERM domain containing 6 [Source:HGNC Symbol;Acc:HGNC:19839]	-
ENSG00000126522	157.602	142.163	169.394	185.089	424.185	616.189	531.002	506.522	163.562	519.474	-1.66534	2.49385e-27	8.01409e-26	ASL	7	66075798	66093558	+	3195	protein_coding	argininosuccinate lyase [Source:HGNC Symbol;Acc:HGNC:746]	-
ENSG00000183421	3268.52	3714.97	3440.06	4236.85	716.872	493.216	1208.49	856.045	3665.1	818.655	2.16185	2.75123e-27	8.82848e-26	RIPK4	21	41739369	41767106	-	4033	protein_coding	receptor interacting serine/threonine kinase 4 [Source:HGNC Symbol;Acc:HGNC:496]	-
ENSG00000124733	674.947	589.935	579.632	708.385	1389.21	1515.35	1535.79	1699.48	638.225	1534.96	-1.26611	2.87361e-27	9.20794e-26	MEA1	6	43011143	43016868	-	3017	protein_coding	male-enhanced antigen 1 [Source:HGNC Symbol;Acc:HGNC:6986]	-
ENSG00000163682	7532.34	6822.13	6256.34	6897.92	16481.7	19552.8	14031.5	16889.4	6877.18	16738.8	-1.28328	2.88437e-27	9.22917e-26	RPL9	4	39452521	39458949	-	5022	protein_coding	ribosomal protein L9 [Source:HGNC Symbol;Acc:HGNC:10369]	-
ENSG00000146192	7.70878	15.323	16.0563	9.25443	93.3207	116.362	117.873	106.576	12.0856	108.533	-3.16102	2.97118e-27	9.49331e-26	FGD2	6	37005646	37029070	+	10167	protein_coding	FYVE, RhoGEF and PH domain containing 2 [Source:HGNC Symbol;Acc:HGNC:3664]	-
ENSG00000137266	457.388	563.545	570.801	556.107	148.465	200.989	169.371	122.62	536.96	160.361	1.74764	3.12204e-27	9.95653e-26	SLC22A23	6	3268962	3457022	-	8898	protein_coding	solute carrier family 22 member 23 [Source:HGNC Symbol;Acc:HGNC:21106]	-
ENSG00000149273	32531.1	29523.1	30105.6	33734.9	63531.2	89051.2	73059.7	78006.6	31473.7	75912.2	-1.27017	3.12509e-27	9.95653e-26	RPS3	11	75399486	75422280	+	5894	protein_coding	ribosomal protein S3 [Source:HGNC Symbol;Acc:HGNC:10420]	-
ENSG00000015532	895.932	761.042	824.491	914.506	288.446	186.443	288.389	307.122	848.993	267.6	1.66239	3.1323e-27	9.96528e-26	XYLT2	17	50346092	50363138	+	5472	protein_coding	xylosyltransferase 2 [Source:HGNC Symbol;Acc:HGNC:15517]	-
ENSG00000139132	238.116	353.28	260.112	290.253	78.4742	51.5695	68.6641	65.3207	285.44	66.0071	2.10569	3.21308e-27	1.02077e-25	FGD4	12	32399529	32646050	+	10629	protein_coding	FYVE, RhoGEF and PH domain containing 4 [Source:HGNC Symbol;Acc:HGNC:19125]	-
ENSG00000152242	1395.29	1551.03	846.167	1245.98	377.525	247.269	322.721	335.771	1259.62	320.821	1.97113	3.25394e-27	1.03228e-25	C18orf25	18	46173553	46266991	+	9576	protein_coding	chromosome 18 open reading frame 25 [Source:HGNC Symbol;Acc:HGNC:28172]	-
ENSG00000099800	1080.94	696.345	871.054	874.965	2130.47	2853.51	2758.01	2718.26	880.826	2615.06	-1.56973	3.38338e-27	1.07182e-25	TIMM13	19	2425624	2427894	-	1973	protein_coding	translocase of inner mitochondrial membrane 13 [Source:HGNC Symbol;Acc:HGNC:11816]	-
ENSG00000083168	760.6	1012.17	780.336	826.168	174.976	81.9822	218.581	200.546	844.818	169.021	2.31722	3.46779e-27	1.097e-25	KAT6A	8	41929479	42052026	-	24175	protein_coding	lysine acetyltransferase 6A [Source:HGNC Symbol;Acc:HGNC:13013]	-
ENSG00000224631	383.726	389.034	389.365	322.223	952.295	1195.35	894.922	1265.16	371.087	1076.93	-1.53653	3.48582e-27	1.10114e-25	RPS27AP16	16	61055399	61055964	-	566	transcribed_processed_pseudogene	ribosomal protein S27a pseudogene 16 [Source:HGNC Symbol;Acc:HGNC:36855]	-
ENSG00000115840	549.893	523.535	494.534	508.152	194.065	157.353	164.794	214.298	519.029	182.627	1.50408	3.50336e-27	1.10512e-25	SLC25A12	2	171784370	171999859	-	5169	protein_coding	solute carrier family 25 member 12 [Source:HGNC Symbol;Acc:HGNC:10982]	-
ENSG00000011454	957.602	1120.28	982.645	944.793	401.915	442.969	414.273	446.931	1001.33	426.522	1.23192	3.6217e-27	1.14084e-25	RABGAP1	9	122940833	123104866	+	9162	protein_coding	RAB GTPase activating protein 1 [Source:HGNC Symbol;Acc:HGNC:17155]	-
ENSG00000197191	114.775	112.369	143.704	164.897	375.404	552.719	589.367	535.171	133.936	513.165	-1.93645	3.62797e-27	1.1412e-25	CYSRT1	9	137224635	137226311	+	1297	protein_coding	cysteine rich tail 1 [Source:HGNC Symbol;Acc:HGNC:30529]	-
ENSG00000138629	860.814	701.452	781.139	821.121	1649.02	2197.65	2027.88	2003.17	791.131	1969.43	-1.31536	3.66366e-27	1.1495e-25	UBL7	15	74445977	74461182	-	1885	protein_coding	ubiquitin like 7 [Source:HGNC Symbol;Acc:HGNC:28221]	-
ENSG00000101182	5581.16	4807.16	5072.99	5724.29	10500.7	14094.3	13024.4	13083.6	5296.4	12675.8	-1.25892	3.66468e-27	1.1495e-25	PSMA7	20	62136735	62143440	-	1750	protein_coding	proteasome subunit alpha 7 [Source:HGNC Symbol;Acc:HGNC:9536]	-
ENSG00000166886	1498.07	1381.62	1241.95	1437.8	489.934	432.39	540.157	621.119	1389.86	520.9	1.4148	3.95897e-27	1.24007e-25	NAB2	12	57088894	57095476	+	3010	protein_coding	NGFI-A binding protein 2 [Source:HGNC Symbol;Acc:HGNC:7627]	-
ENSG00000103145	664.668	528.643	537.083	657.906	1529.19	2177.82	1663.96	1576.86	597.075	1736.96	-1.54012	4.03492e-27	1.26209e-25	HCFC1R1	16	3022620	3024286	-	1433	protein_coding	host cell factor C1 regulator 1 [Source:HGNC Symbol;Acc:HGNC:21198]	-
ENSG00000148346	1642.83	1555.28	1773.42	1802.09	3417.87	4740.42	4122.13	4358.15	1693.4	4159.64	-1.29624	4.05306e-27	1.26598e-25	LCN2	9	128149071	128153455	+	1598	protein_coding	lipocalin 2 [Source:HGNC Symbol;Acc:HGNC:6526]	-
ENSG00000184697	1.71306	0	0.802815	2.52394	97.5625	195.7	178.527	134.079	1.25995	151.467	-6.91049	4.20662e-27	1.31211e-25	CLDN6	16	3014712	3020071	-	1739	protein_coding	claudin 6 [Source:HGNC Symbol;Acc:HGNC:2048]	-
ENSG00000189043	3027.84	2717.28	2321.74	2955.53	6750.9	8805.16	6290.77	7853.38	2755.6	7425.05	-1.42998	4.25188e-27	1.32438e-25	NDUFA4	7	10931951	10940256	-	3556	protein_coding	NDUFA4, mitochondrial complex associated [Source:HGNC Symbol;Acc:HGNC:7687]	-
ENSG00000102908	779.444	990.886	546.717	719.322	227.999	175.865	211.714	170.751	759.092	196.582	1.94716	4.58674e-27	1.42669e-25	NFAT5	16	69565094	69704666	+	16401	protein_coding	nuclear factor of activated T cells 5 [Source:HGNC Symbol;Acc:HGNC:7774]	RHD
ENSG00000106305	286.938	222.183	362.872	269.22	872.76	798.666	1079.17	1023.36	285.303	943.488	-1.72521	4.64873e-27	1.44396e-25	AIMP2	7	6009245	6023834	+	1838	protein_coding	aminoacyl tRNA synthetase complex interacting multifunctional protein 2 [Source:HGNC Symbol;Acc:HGNC:20609]	-
ENSG00000210140	761.456	824.887	986.66	861.504	2431.64	2358.97	1867.66	2108.6	858.627	2191.72	-1.3517	4.79436e-27	1.48712e-25	MT-TC	MT	5761	5826	-	66	Mt_tRNA	mitochondrially encoded tRNA cysteine [Source:HGNC Symbol;Acc:HGNC:7477]	-
ENSG00000113369	1449.25	1623.39	843.758	1414.25	400.855	330.574	350.187	313.998	1332.66	348.903	1.93254	5.20681e-27	1.61281e-25	ARRDC3	5	91368724	91383359	-	4934	protein_coding	arrestin domain containing 3 [Source:HGNC Symbol;Acc:HGNC:29263]	-
ENSG00000110700	5875.81	5192.79	4503.79	5183.32	13564.4	15998.4	11073.2	13857.2	5188.93	13623.3	-1.39255	5.52641e-27	1.70943e-25	RPS13	11	17074389	17077787	-	2186	protein_coding	ribosomal protein S13 [Source:HGNC Symbol;Acc:HGNC:10386]	-
ENSG00000112983	1076.66	1043.67	994.688	918.713	319.199	187.766	363.92	288.786	1008.43	289.918	1.7953	6.41429e-27	1.98132e-25	BRD8	5	138139766	138178986	-	7046	protein_coding	bromodomain containing 8 [Source:HGNC Symbol;Acc:HGNC:19874]	-
ENSG00000111816	674.947	899.8	618.167	794.199	222.697	101.817	161.361	192.524	746.778	169.6	2.13345	6.46414e-27	1.99396e-25	FRK	6	115931149	116060758	-	13230	protein_coding	fyn related Src family tyrosine kinase [Source:HGNC Symbol;Acc:HGNC:3955]	-
ENSG00000116455	209.85	165.999	178.225	172.469	470.845	468.092	559.612	521.419	181.636	504.992	-1.47574	6.81954e-27	2.10068e-25	WDR77	1	111439890	111449376	-	2805	protein_coding	WD repeat domain 77 [Source:HGNC Symbol;Acc:HGNC:29652]	-
ENSG00000197696	287.795	207.712	222.38	263.331	641.58	956.019	733.561	878.964	245.304	802.531	-1.70928	7.09719e-27	2.18319e-25	NMB	15	84655129	84658563	-	1022	protein_coding	neuromedin B [Source:HGNC Symbol;Acc:HGNC:7842]	-
ENSG00000196588	710.065	935.553	992.279	997.796	299.05	230.079	323.866	313.998	908.923	291.748	1.63755	7.14139e-27	2.19376e-25	MRTFA	22	40410281	40636702	-	6533	protein_coding	myocardin related transcription factor A [Source:HGNC Symbol;Acc:HGNC:14334]	-
ENSG00000139343	830.835	732.098	702.463	882.536	1814.45	1857.82	1681.13	1848.46	786.983	1800.47	-1.19404	7.16621e-27	2.19836e-25	SNRPF	12	95858928	95903828	+	3043	protein_coding	small nuclear ribonucleoprotein polypeptide F [Source:HGNC Symbol;Acc:HGNC:11162]	-
ENSG00000278952	5.99572	4.25638	8.02815	4.20656	82.716	133.552	111.007	68.7586	5.6217	99.0083	-4.12924	7.35592e-27	2.25346e-25	AP003068.4	11	65118310	65119111	+	802	TEC	TEC	-
ENSG00000203392	131.906	135.353	105.169	129.562	18.0279	6.61147	2.2888	11.4598	125.497	9.59697	3.68044	7.51864e-27	2.30015e-25	AC105020.1	15	75678548	75680752	+	2205	antisense	novel transcript, antisense to CSPG4	-
ENSG00000100344	185.867	225.588	166.986	200.232	34.9953	37.0242	49.2093	42.4011	194.668	40.9075	2.2497	7.67831e-27	2.34578e-25	PNPLA3	22	43923739	43964488	+	3232	protein_coding	patatin like phospholipase domain containing 3 [Source:HGNC Symbol;Acc:HGNC:18590]	-
ENSG00000138835	670.664	659.74	605.322	616.682	249.209	284.293	218.581	223.465	638.102	243.887	1.38966	7.77178e-27	2.37108e-25	RGS3	9	113444731	113597743	+	13793	protein_coding	regulator of G protein signaling 3 [Source:HGNC Symbol;Acc:HGNC:9999]	-
ENSG00000104899	4.28266	5.10766	15.2535	2.52394	103.925	216.856	165.938	90.5322	6.79193	144.313	-4.39289	8.00031e-27	2.43747e-25	AMH	19	2249309	2252073	+	2587	protein_coding	anti-Mullerian hormone [Source:HGNC Symbol;Acc:HGNC:464]	-
ENSG00000173113	2494.22	2060.94	1841.66	2377.55	5011.74	5992.64	5098.31	5595.81	2193.59	5424.62	-1.3062	8.28948e-27	2.52213e-25	TRMT112	11	64316460	64318084	-	1625	protein_coding	tRNA methyltransferase subunit 11-2 [Source:HGNC Symbol;Acc:HGNC:26940]	-
ENSG00000161671	1211.14	1012.17	1205.03	1064.26	2565.26	3764.57	2950.27	2834	1123.15	3028.52	-1.43063	9.26685e-27	2.81566e-25	EMC10	19	50476400	50490870	+	10748	protein_coding	ER membrane protein complex subunit 10 [Source:HGNC Symbol;Acc:HGNC:27609]	-
ENSG00000006015	408.565	326.039	447.971	446.737	1013.8	1533.86	1193.61	1267.45	407.328	1252.18	-1.6192	1.0685e-26	3.24212e-25	REX1BD	19	18588685	18592336	+	3370	protein_coding	required for excision 1-B domain containing [Source:HGNC Symbol;Acc:HGNC:26098]	-
ENSG00000145022	89.0793	61.2919	56.197	47.9548	252.39	306.772	258.635	264.721	63.6308	270.629	-2.08873	1.11907e-26	3.39096e-25	TCTA	3	49412206	49416475	+	2747	protein_coding	T cell leukemia translocation altered [Source:HGNC Symbol;Acc:HGNC:11692]	-
ENSG00000212694	61.6703	53.6305	118.014	58.0505	346.771	527.595	553.89	343.793	72.8413	443.012	-2.60138	1.12148e-26	3.39367e-25	LINC01089	12	121795267	121803906	-	4132	lincRNA	long intergenic non-protein coding RNA 1089 [Source:HGNC Symbol;Acc:HGNC:27886]	-
ENSG00000128626	400.857	299.65	397.393	404.671	883.365	1139.82	1143.26	1261.72	375.643	1107.04	-1.55876	1.1551e-26	3.49066e-25	MRPS12	19	38930548	38933162	+	2144	protein_coding	mitochondrial ribosomal protein S12 [Source:HGNC Symbol;Acc:HGNC:10380]	-
ENSG00000066422	609.85	655.483	483.295	488.802	177.097	165.287	175.093	203.984	559.358	180.365	1.63156	1.19263e-26	3.5992e-25	ZBTB11	3	101648889	101677495	-	7416	protein_coding	zinc finger and BTB domain containing 11 [Source:HGNC Symbol;Acc:HGNC:16740]	ZBTB
ENSG00000198382	362.313	361.793	296.239	354.192	102.865	122.973	107.574	91.6782	343.634	106.273	1.69626	1.24281e-26	3.74555e-25	UVRAG	11	75815167	76143195	+	6352	protein_coding	UV radiation resistance associated [Source:HGNC Symbol;Acc:HGNC:12640]	-
ENSG00000053254	307.495	374.562	296.239	338.207	111.349	99.1721	100.707	98.554	329.126	102.445	1.68191	1.30864e-26	3.93862e-25	FOXN3	14	89124871	89619149	-	11033	protein_coding	forkhead box N3 [Source:HGNC Symbol;Acc:HGNC:1928]	Fork
ENSG00000169375	1943.47	2214.17	2052.8	1900.52	566.287	271.07	511.547	627.995	2027.74	494.225	2.03477	1.31292e-26	3.9462e-25	SIN3A	15	75369379	75455842	-	12453	protein_coding	SIN3 transcription regulator family member A [Source:HGNC Symbol;Acc:HGNC:19353]	-
ENSG00000198799	515.632	544.817	346.816	456.832	112.409	31.7351	64.0865	77.9264	466.024	71.5392	2.69279	1.32099e-26	3.9651e-25	LRIG2	1	113073209	113132260	+	12456	protein_coding	leucine rich repeats and immunoglobulin like domains 2 [Source:HGNC Symbol;Acc:HGNC:20889]	-
ENSG00000276710	151.606	267.301	281.788	299.507	39.2371	43.6357	48.0649	40.1092	250.051	42.7617	2.54951	1.36633e-26	4.09568e-25	CSPG4P10	15	82459472	82477258	+	7178	transcribed_unprocessed_pseudogene	chondroitin sulfate proteoglycan 4 pseudogene 10 [Source:HGNC Symbol;Acc:HGNC:48361]	-
ENSG00000127884	1647.97	1384.18	1555.86	1574.94	3123.06	3953.66	3334.79	3655.67	1540.73	3516.79	-1.19036	1.40278e-26	4.19931e-25	ECHS1	10	133362480	133373689	-	1617	protein_coding	enoyl-CoA hydratase, short chain 1 [Source:HGNC Symbol;Acc:HGNC:3151]	-
ENSG00000177700	753.748	641.863	612.548	832.899	1691.44	2201.62	2141.17	2677	710.264	2177.81	-1.61641	1.45436e-26	4.34787e-25	POLR2L	11	837356	842545	-	1142	protein_coding	RNA polymerase II subunit L [Source:HGNC Symbol;Acc:HGNC:9199]	-
ENSG00000104904	6130.2	4865.05	4800.83	5117.7	12116.8	18372	13874.7	13940.8	5228.44	14576.1	-1.47909	1.48226e-26	4.42536e-25	OAZ1	19	2269509	2273490	+	3436	protein_coding	ornithine decarboxylase antizyme 1 [Source:HGNC Symbol;Acc:HGNC:8095]	-
ENSG00000196730	292.077	326.039	336.379	337.366	84.837	117.684	102.996	84.8023	322.965	97.5799	1.7326	1.60323e-26	4.78011e-25	DAPK1	9	87497228	87708633	+	8907	protein_coding	death associated protein kinase 1 [Source:HGNC Symbol;Acc:HGNC:2674]	-
ENSG00000183978	262.099	247.722	240.844	242.298	612.947	617.511	551.601	684.148	248.241	616.552	-1.31263	1.78059e-26	5.30184e-25	COA3	17	42795147	42798704	-	1922	protein_coding	cytochrome c oxidase assembly factor 3 [Source:HGNC Symbol;Acc:HGNC:24990]	-
ENSG00000113615	460.814	458.838	426.295	378.59	146.344	100.494	127.029	154.707	431.134	132.143	1.70107	1.81425e-26	5.39484e-25	SEC24A	5	134648789	134727823	+	7201	protein_coding	SEC24 homolog A, COPII coat complex component [Source:HGNC Symbol;Acc:HGNC:10703]	-
ENSG00000068079	197.002	151.527	173.408	168.262	446.455	527.595	479.504	453.807	172.55	476.84	-1.4655	1.83797e-26	5.45811e-25	IFI35	17	43006725	43014456	+	1973	protein_coding	interferon induced protein 35 [Source:HGNC Symbol;Acc:HGNC:5399]	-
ENSG00000272449	12.848	5.10766	20.8732	10.0957	116.651	198.344	117.873	119.182	12.2311	138.012	-3.48575	1.92379e-26	5.70536e-25	AL139246.5	1	2530064	2547460	+	1531	lincRNA	novel transcript	-
ENSG00000230989	1366.17	1335.65	1130.36	1386.48	2904.61	3075.66	2636.7	2910.78	1304.67	2881.94	-1.14338	1.95622e-26	5.79386e-25	HSBP1	16	83807843	83819737	+	9525	protein_coding	heat shock factor binding protein 1 [Source:HGNC Symbol;Acc:HGNC:5203]	-
ENSG00000111605	537.045	618.027	553.942	533.392	1298.01	1141.14	1414.48	1355.69	560.602	1302.33	-1.21657	1.98451e-26	5.86985e-25	CPSF6	12	69239537	69274358	+	8082	protein_coding	cleavage and polyadenylation specific factor 6 [Source:HGNC Symbol;Acc:HGNC:13871]	-
ENSG00000007520	686.082	553.33	763.477	618.364	1519.64	2065.42	1724.61	1809.5	655.313	1779.79	-1.44076	2.00119e-26	5.91132e-25	TSR3	16	1349240	1351911	-	1243	protein_coding	TSR3, acp transferase ribosome maturation factor [Source:HGNC Symbol;Acc:HGNC:14175]	-
ENSG00000151729	202.998	178.768	170.197	192.66	480.389	454.869	525.28	476.726	186.156	484.316	-1.38041	2.08636e-26	6.15477e-25	SLC25A4	4	185143241	185150382	+	4844	protein_coding	solute carrier family 25 member 4 [Source:HGNC Symbol;Acc:HGNC:10990]	-
ENSG00000141738	5600.86	4668.4	3709.81	5817.67	1326.64	1797	1770.39	1504.67	4949.19	1599.67	1.62973	2.14488e-26	6.31903e-25	GRB7	17	39737927	39747291	+	3597	protein_coding	growth factor receptor bound protein 7 [Source:HGNC Symbol;Acc:HGNC:4567]	-
ENSG00000145990	537.902	587.381	418.267	557.79	161.19	126.94	173.949	179.918	525.335	160.499	1.70743	2.20794e-26	6.49624e-25	GFOD1	6	13357830	13487662	-	10686	protein_coding	glucose-fructose oxidoreductase domain containing 1 [Source:HGNC Symbol;Acc:HGNC:21096]	-
ENSG00000173530	19.7002	28.0921	24.0844	25.2394	134.679	122.973	220.869	155.853	24.279	158.594	-2.70859	2.22536e-26	6.53887e-25	TNFRSF10D	8	23135588	23164030	-	3538	protein_coding	TNF receptor superfamily member 10d [Source:HGNC Symbol;Acc:HGNC:11907]	-
ENSG00000076003	562.741	549.074	651.886	577.14	1329.82	1196.68	1387.01	1426.74	585.21	1335.06	-1.19001	2.40415e-26	7.05492e-25	MCM6	2	135839626	135876426	-	4118	protein_coding	minichromosome maintenance complex component 6 [Source:HGNC Symbol;Acc:HGNC:6949]	-
ENSG00000142541	25843.3	23095.1	24292.4	26715.9	51554.4	71169.8	55630.5	58912.4	24986.7	59316.8	-1.24726	2.43793e-26	7.14464e-25	RPL13A	19	49487554	49492308	+	2369	protein_coding	ribosomal protein L13a [Source:HGNC Symbol;Acc:HGNC:10304]	-
ENSG00000132424	1325.91	1540.81	1000.31	1287.21	474.027	350.408	424.573	452.661	1288.56	425.417	1.59715	2.51471e-26	7.35998e-25	PNISR	6	99398051	99425331	-	10870	protein_coding	PNN interacting serine and arginine rich protein [Source:HGNC Symbol;Acc:HGNC:21222]	-
ENSG00000184349	113.919	137.907	138.084	156.484	21.2092	21.1567	19.4548	22.9195	136.598	21.1851	2.68898	2.55967e-26	7.48175e-25	EFNA5	5	107376889	107670895	-	5703	protein_coding	ephrin A5 [Source:HGNC Symbol;Acc:HGNC:3225]	-
ENSG00000246228	11.1349	6.81022	9.63378	5.04787	74.2324	115.04	94.9853	97.408	8.15669	95.4163	-3.54387	2.78068e-26	8.1171e-25	CASC8	8	127289817	127482139	-	2342	antisense	cancer susceptibility 8 [Source:HGNC Symbol;Acc:HGNC:45129]	-
ENSG00000188070	514.775	498.848	419.069	536.757	181.339	157.353	176.238	184.502	492.363	174.858	1.4913	3.01286e-26	8.78337e-25	C11orf95	11	63759892	63768775	-	5948	protein_coding	chromosome 11 open reading frame 95 [Source:HGNC Symbol;Acc:HGNC:28449]	-
ENSG00000154124	971.307	1167.95	794.787	943.111	370.101	257.847	321.577	256.699	969.289	301.556	1.68227	3.20135e-26	9.32068e-25	OTULIN	5	14664664	14699711	+	8614	protein_coding	OTU deubiquitinase with linear linkage specificity [Source:HGNC Symbol;Acc:HGNC:25118]	-
ENSG00000053372	332.334	282.624	410.238	361.764	1128.33	835.69	1163.86	1309.85	346.74	1109.43	-1.67812	3.61016e-26	1.04972e-24	MRTO4	1	19251539	19260128	+	2822	protein_coding	MRT4 homolog, ribosome maturation factor [Source:HGNC Symbol;Acc:HGNC:18477]	-
ENSG00000188895	3099.79	3408.51	2286.42	2810.82	1097.58	732.551	1016.23	963.767	2901.39	952.531	1.60594	3.71874e-26	1.07989e-24	MSL1	17	40122298	40136916	+	7397	protein_coding	male specific lethal 1 homolog [Source:HGNC Symbol;Acc:HGNC:27905]	-
ENSG00000095015	232.977	398.398	252.084	260.807	56.2045	21.1567	45.776	55.0069	286.066	44.536	2.67084	3.8077e-26	1.10428e-24	MAP3K1	5	56815574	56896152	+	7716	protein_coding	mitogen-activated protein kinase kinase kinase 1 [Source:HGNC Symbol;Acc:HGNC:6848]	-
ENSG00000085433	1022.7	1241.16	964.181	993.59	460.241	362.309	410.84	381.61	1055.41	403.75	1.38464	3.81968e-26	1.10632e-24	WDR47	1	108970214	109042113	-	4423	protein_coding	WD repeat domain 47 [Source:HGNC Symbol;Acc:HGNC:29141]	-
ENSG00000197956	11392.7	9800.75	9677.13	12405.1	24700.3	32326.1	24395.2	28958.8	10818.9	27595.1	-1.35083	3.85872e-26	1.11618e-24	S100A6	1	153534599	153536244	-	971	protein_coding	S100 calcium binding protein A6 [Source:HGNC Symbol;Acc:HGNC:10496]	-
ENSG00000157837	705.782	726.991	686.407	783.262	290.567	255.203	246.046	326.603	725.61	279.605	1.37442	3.88843e-26	1.12331e-24	SPPL3	12	120762510	120904371	-	6672	protein_coding	signal peptide peptidase like 3 [Source:HGNC Symbol;Acc:HGNC:30424]	-
ENSG00000163121	463.384	302.203	135.676	351.668	22.2697	40.9911	26.3212	37.8172	313.233	31.8498	3.30523	4.09408e-26	1.18017e-24	NEURL3	2	96497643	96508109	-	2497	protein_coding	neuralized E3 ubiquitin protein ligase 3 [Source:HGNC Symbol;Acc:HGNC:25162]	-
ENSG00000100207	1745.61	1968.15	1557.46	1792.84	594.919	341.152	609.966	570.697	1766.02	529.183	1.73676	4.09584e-26	1.18017e-24	TCF20	22	42160013	42343616	-	7548	protein_coding	transcription factor 20 [Source:HGNC Symbol;Acc:HGNC:11631]	-
ENSG00000181649	2010.28	1212.22	842.956	1682.62	10797.6	19692.9	14132.2	13728.8	1437.02	14587.9	-3.34365	4.16118e-26	1.19745e-24	PHLDA2	11	2928273	2929455	-	955	protein_coding	pleckstrin homology like domain family A member 2 [Source:HGNC Symbol;Acc:HGNC:12385]	-
ENSG00000037897	96.7881	78.3175	102.76	80.766	307.534	275.037	402.829	446.931	89.6579	358.083	-1.99809	4.32259e-26	1.2423e-24	METTL1	12	57768471	57772793	-	2621	protein_coding	methyltransferase like 1 [Source:HGNC Symbol;Acc:HGNC:7030]	-
ENSG00000100300	2999.57	2499.35	3174.33	3327.39	6882.4	10973.7	8231.68	8777.04	3000.16	8716.21	-1.53851	4.68232e-26	1.34395e-24	TSPO	22	43151514	43163242	+	1455	protein_coding	translocator protein [Source:HGNC Symbol;Acc:HGNC:1158]	-
ENSG00000259523	5.13919	2.55383	4.81689	1.68262	72.1114	91.2383	85.8301	79.0724	3.54813	82.0631	-4.52599	4.73189e-26	1.35644e-24	AC022613.2	15	29822631	29824081	+	1451	antisense	novel transcript, antisense to TJP1	-
ENSG00000243244	324.625	440.11	344.408	460.198	123.014	117.684	111.007	99.7	392.335	112.851	1.79747	4.98821e-26	1.42808e-24	STON1	2	48529383	48598513	+	7709	protein_coding	stonin 1 [Source:HGNC Symbol;Acc:HGNC:17003]	-
ENSG00000134317	236.403	222.183	168.591	209.487	49.8417	25.1236	40.054	48.131	209.166	40.7876	2.34565	5.09694e-26	1.45733e-24	GRHL1	2	9951693	10002277	+	7952	protein_coding	grainyhead like transcription factor 1 [Source:HGNC Symbol;Acc:HGNC:17923]	CP2
ENSG00000145494	1028.69	858.938	891.927	1204.76	2386.04	2819.13	2407.82	2891.3	996.08	2626.07	-1.39847	5.15464e-26	1.47194e-24	NDUFS6	5	1801400	1816605	+	1451	protein_coding	NADH:ubiquinone oxidoreductase subunit S6 [Source:HGNC Symbol;Acc:HGNC:7713]	-
ENSG00000110921	1744.75	1523.79	1373.62	1705.34	449.636	528.918	582.5	683.002	1586.87	561.014	1.50023	5.30576e-26	1.51316e-24	MVK	12	109573255	109598117	+	6480	protein_coding	mevalonate kinase [Source:HGNC Symbol;Acc:HGNC:7530]	-
ENSG00000204138	401.713	553.33	578.027	518.248	146.344	101.817	157.927	165.021	512.83	142.777	1.84093	5.34669e-26	1.52288e-24	PHACTR4	1	28369582	28500369	+	7322	protein_coding	phosphatase and actin regulator 4 [Source:HGNC Symbol;Acc:HGNC:25793]	-
ENSG00000002549	336.617	325.188	343.605	298.666	731.719	772.22	704.951	780.41	326.019	747.325	-1.19633	5.35596e-26	1.52358e-24	LAP3	4	17577192	17607972	+	3785	protein_coding	leucine aminopeptidase 3 [Source:HGNC Symbol;Acc:HGNC:18449]	-
ENSG00000136205	1842.4	2012.42	2001.42	1956.05	916.239	866.103	1025.38	938.555	1953.07	936.57	1.05988	5.70575e-26	1.62101e-24	TNS3	7	47275154	47582558	-	11797	protein_coding	tensin 3 [Source:HGNC Symbol;Acc:HGNC:21616]	-
ENSG00000063169	515.632	480.12	488.914	530.868	123.014	64.7924	162.505	126.057	503.884	119.092	2.07504	5.84094e-26	1.65731e-24	BICRA	19	47608196	47703277	+	7507	protein_coding	BRD4 interacting chromatin remodeling complex associated protein [Source:HGNC Symbol;Acc:HGNC:4332]	-
ENSG00000115946	116.488	116.625	96.3378	98.4335	380.706	277.682	410.84	377.026	106.971	361.564	-1.75957	6.06706e-26	1.71928e-24	PNO1	2	68157844	68176238	+	2674	protein_coding	partner of NOB1 homolog [Source:HGNC Symbol;Acc:HGNC:32790]	-
ENSG00000213442	1901.5	1580.82	1615.26	1869.4	3970.37	6110.32	5033.08	4355.86	1741.75	4867.41	-1.48242	6.07627e-26	1.71971e-24	RPL18AP3	12	104265309	104265836	+	528	processed_pseudogene	ribosomal protein L18a pseudogene 3 [Source:HGNC Symbol;Acc:HGNC:31387]	-
ENSG00000156299	329.765	334.552	274.563	302.031	76.3533	103.139	54.9313	51.569	310.228	71.4981	2.12479	6.11861e-26	1.7295e-24	TIAM1	21	31118416	31559977	-	9216	protein_coding	T cell lymphoma invasion and metastasis 1 [Source:HGNC Symbol;Acc:HGNC:11805]	-
ENSG00000229512	231.263	171.107	101.957	164.897	22.2697	17.1898	20.5992	14.8977	167.306	18.7391	3.15241	6.15519e-26	1.73763e-24	AC068580.1	11	1763009	1763749	-	252	sense_intronic	novel transcript	-
ENSG00000133316	531.906	496.294	602.914	508.994	1283.16	1229.73	1721.18	1611.24	535.027	1461.33	-1.44963	6.2642e-26	1.76453e-24	WDR74	11	62832342	62841809	-	4247	protein_coding	WD repeat domain 74 [Source:HGNC Symbol;Acc:HGNC:25529]	-
ENSG00000107863	1403.86	1844.72	1413.76	1488.28	592.798	477.348	580.211	646.331	1537.65	574.172	1.42001	6.26629e-26	1.76453e-24	ARHGAP21	10	24583609	24723668	-	10937	protein_coding	Rho GTPase activating protein 21 [Source:HGNC Symbol;Acc:HGNC:23725]	-
ENSG00000105976	1235.97	1327.14	1122.34	1067.62	542.957	442.969	484.082	499.646	1188.27	492.413	1.26953	6.90062e-26	1.9407e-24	MET	7	116672390	116798386	+	7039	protein_coding	MET proto-oncogene, receptor tyrosine kinase [Source:HGNC Symbol;Acc:HGNC:7029]	-
ENSG00000198712	94481.4	126037	108956	135369	282484	373770	280590	344439	116211	320321	-1.46277	7.24609e-26	2.03529e-24	MT-CO2	MT	7586	8269	+	684	protein_coding	mitochondrially encoded cytochrome c oxidase II [Source:HGNC Symbol;Acc:HGNC:7421]	-
ENSG00000147669	334.047	300.501	266.535	284.363	786.863	721.973	663.753	764.367	296.362	734.239	-1.30967	7.32197e-26	2.05402e-24	POLR2K	8	100150584	100154002	+	1711	protein_coding	RNA polymerase II subunit K [Source:HGNC Symbol;Acc:HGNC:9198]	-
ENSG00000175756	978.159	717.627	1033.22	917.871	2311.81	3206.56	2317.41	2719.4	911.72	2638.8	-1.53277	7.43772e-26	2.08387e-24	AURKAIP1	1	1373730	1375495	-	1669	protein_coding	aurora kinase A interacting protein 1 [Source:HGNC Symbol;Acc:HGNC:24114]	-
ENSG00000189171	609.85	494.592	463.224	531.709	1485.71	1630.39	1203.91	1296.1	524.844	1404.03	-1.4195	7.45575e-26	2.0863e-24	S100A13	1	153618787	153631360	-	2216	protein_coding	S100 calcium binding protein A13 [Source:HGNC Symbol;Acc:HGNC:10490]	-
ENSG00000139266	954.176	791.688	826.899	866.551	310.715	249.914	335.31	365.567	859.829	315.376	1.44489	7.58561e-26	2.11998e-24	2023-03-09	12	57755098	57760407	+	4005	protein_coding	membrane associated ring-CH-type finger 9 [Source:HGNC Symbol;Acc:HGNC:25139]	-
ENSG00000059758	363.169	432.449	299.45	346.621	120.893	95.2052	96.1297	105.43	360.422	104.414	1.7839	7.95929e-26	2.22163e-24	CDK17	12	96278261	96400560	-	6547	protein_coding	cyclin dependent kinase 17 [Source:HGNC Symbol;Acc:HGNC:8750]	-
ENSG00000101294	2542.19	2220.98	2454.21	2462.52	4569.53	5666.03	5061.69	5246.28	2419.97	5135.88	-1.08542	8.17647e-26	2.27939e-24	HM13	20	31514410	31577923	+	10805	protein_coding	histocompatibility minor 13 [Source:HGNC Symbol;Acc:HGNC:16435]	-
ENSG00000052126	370.022	392.439	414.252	354.192	150.586	111.073	113.296	128.349	382.726	125.826	1.60095	8.25609e-26	2.29872e-24	PLEKHA5	12	19129752	19376400	+	12558	protein_coding	pleckstrin homology domain containing A5 [Source:HGNC Symbol;Acc:HGNC:30036]	-
ENSG00000131469	9653.11	8450.63	7420.42	9548.05	18989.7	26322.9	21337.4	22534.5	8768.05	22296.1	-1.34644	8.91633e-26	2.47945e-24	RPL27	17	42998273	43002959	+	2026	protein_coding	ribosomal protein L27 [Source:HGNC Symbol;Acc:HGNC:10328]	-
ENSG00000156463	927.624	963.646	851.787	899.363	351.013	420.49	387.952	418.282	910.605	394.434	1.20833	8.97385e-26	2.49234e-24	SH3RF2	5	145936579	146081791	+	7232	protein_coding	SH3 domain containing ring finger 2 [Source:HGNC Symbol;Acc:HGNC:26299]	-
ENSG00000136247	359.743	319.229	357.253	312.968	827.16	817.178	723.262	776.972	337.298	786.143	-1.22053	9.32866e-26	2.58766e-24	ZDHHC4	7	6577434	6589374	+	3557	protein_coding	zinc finger DHHC-type containing 4 [Source:HGNC Symbol;Acc:HGNC:18471]	-
ENSG00000130962	286.938	364.347	274.563	296.983	94.3811	63.4701	75.5305	93.9701	305.708	81.838	1.89501	9.59627e-26	2.65581e-24	PRRG1	X	37349275	37457295	+	6180	protein_coding	proline rich and Gla domain 1 [Source:HGNC Symbol;Acc:HGNC:9469]	-
ENSG00000233493	285.225	217.927	330.76	334.842	845.188	1462.46	940.698	1195.25	292.188	1110.9	-1.92567	9.59816e-26	2.65581e-24	TMEM238	19	55379245	55384598	-	1000	protein_coding	transmembrane protein 238 [Source:HGNC Symbol;Acc:HGNC:40042]	-
ENSG00000037241	364.026	341.362	317.112	334.001	714.751	794.699	811.38	872.088	339.125	798.23	-1.23498	1.05378e-25	2.91219e-24	RPL26L1	5	172958729	172969771	+	1164	protein_coding	ribosomal protein L26 like 1 [Source:HGNC Symbol;Acc:HGNC:17050]	-
ENSG00000183741	3624.84	3342.96	3310.81	3065.74	1650.08	1561.63	1709.74	1476.02	3336.09	1599.37	1.06048	1.0667e-25	2.94424e-24	CBX6	22	38861450	38872314	-	8030	protein_coding	chromobox 6 [Source:HGNC Symbol;Acc:HGNC:1556]	-
ENSG00000180263	708.351	820.631	587.661	616.682	270.418	208.922	203.703	205.13	683.331	222.043	1.61965	1.07117e-25	2.95294e-24	FGD6	12	95076749	95217482	-	10044	protein_coding	FYVE, RhoGEF and PH domain containing 6 [Source:HGNC Symbol;Acc:HGNC:21740]	-
ENSG00000126756	578.159	514.171	455.196	464.404	1256.65	1610.55	1147.83	1424.45	502.983	1359.87	-1.43454	1.08808e-25	2.99585e-24	UXT	X	47651798	47659161	-	1243	protein_coding	ubiquitously expressed prefoldin like chaperone [Source:HGNC Symbol;Acc:HGNC:12641]	-
ENSG00000159348	2200.43	1955.38	2004.63	2158.81	3879.17	4236.63	4610.79	4381.07	2079.81	4276.92	-1.04009	1.10774e-25	3.04621e-24	CYB5R1	1	202961869	202967280	-	4504	protein_coding	cytochrome b5 reductase 1 [Source:HGNC Symbol;Acc:HGNC:13397]	-
ENSG00000147144	1070.66	1024.94	854.195	1146.71	397.673	362.309	437.161	407.968	1024.13	401.278	1.3507	1.15507e-25	3.17246e-24	CCDC120	X	49053572	49069857	+	5318	protein_coding	coiled-coil domain containing 120 [Source:HGNC Symbol;Acc:HGNC:28910]	-
ENSG00000184363	6001.72	5143.42	6534.11	6301.43	12581.3	15693	13655	13022.9	5995.17	13738	-1.19621	1.25072e-25	3.43094e-24	PKP3	11	392614	404908	+	3787	protein_coding	plakophilin 3 [Source:HGNC Symbol;Acc:HGNC:9025]	-
ENSG00000122406	12202.1	11220.7	10385.2	11226.5	22828.6	28716.3	22790.8	24714.1	11258.6	24762.4	-1.13709	1.28501e-25	3.52069e-24	RPL5	1	92831983	92841924	+	3717	protein_coding	ribosomal protein L5 [Source:HGNC Symbol;Acc:HGNC:10360]	-
ENSG00000126088	541.328	436.705	593.28	501.422	1151.66	1603.94	1427.07	1435.91	518.184	1404.65	-1.43784	1.28858e-25	3.52612e-24	UROD	1	45012147	45015575	+	2908	protein_coding	uroporphyrinogen decarboxylase [Source:HGNC Symbol;Acc:HGNC:12591]	-
ENSG00000175792	1515.2	1381.62	1483.6	1452.1	2819.77	3853.17	3268.41	3463.14	1458.13	3351.12	-1.20017	1.38414e-25	3.78297e-24	RUVBL1	3	128064778	128153914	-	6860	protein_coding	RuvB like AAA ATPase 1 [Source:HGNC Symbol;Acc:HGNC:10474]	-
ENSG00000165030	400.857	436.705	243.253	385.321	69.9905	78.0154	67.5197	103.138	366.534	79.6659	2.20216	1.43479e-25	3.91662e-24	NFIL3	9	91409045	91423862	-	2085	protein_coding	nuclear factor, interleukin 3 regulated [Source:HGNC Symbol;Acc:HGNC:7787]	TF_bZIP
ENSG00000146540	2284.37	1997.95	2490.33	2144.5	5136.88	7919.22	5560.65	6064.51	2229.29	6170.31	-1.46852	1.52089e-25	4.14656e-24	C7orf50	7	996986	1138260	-	4961	protein_coding	chromosome 7 open reading frame 50 [Source:HGNC Symbol;Acc:HGNC:22421]	-
ENSG00000156052	1285.65	1535.7	1200.21	1307.4	601.282	515.695	434.872	495.062	1332.24	511.728	1.37978	1.52435e-25	4.15093e-24	GNAQ	9	77716087	78031458	-	6629	protein_coding	G protein subunit alpha q [Source:HGNC Symbol;Acc:HGNC:4390]	-
ENSG00000168653	1626.55	1501.65	1370.41	1736.47	3171.84	3746.06	3420.62	3793.18	1558.77	3532.93	-1.18039	1.53204e-25	4.16678e-24	NDUFS5	1	39026318	39034636	+	548	protein_coding	NADH:ubiquinone oxidoreductase subunit S5 [Source:HGNC Symbol;Acc:HGNC:7712]	-
ENSG00000109670	359.743	370.305	264.126	383.638	109.228	74.0485	93.8409	69.9046	344.453	86.7554	1.98397	1.60915e-25	4.37115e-24	FBXW7	4	152320544	152536063	-	11095	protein_coding	F-box and WD repeat domain containing 7 [Source:HGNC Symbol;Acc:HGNC:16712]	-
ENSG00000205268	447.966	499.7	372.506	430.752	164.372	124.296	128.173	104.284	437.731	130.281	1.74534	1.70855e-25	4.63554e-24	PDE7A	8	65717510	65842322	-	7425	protein_coding	phosphodiesterase 7A [Source:HGNC Symbol;Acc:HGNC:8791]	-
ENSG00000164400	11.9914	5.10766	5.6197	5.88918	82.716	109.75	83.5413	81.3644	7.152	89.343	-3.64479	1.71485e-25	4.64696e-24	CSF2	5	132073790	132076170	+	787	protein_coding	colony stimulating factor 2 [Source:HGNC Symbol;Acc:HGNC:2434]	-
ENSG00000111669	9777.31	7390.79	7295.98	8476.22	18057.5	24782.4	20373.8	22070.4	8235.07	21321	-1.3724	1.75988e-25	4.76321e-24	TPI1	12	6867119	6870948	+	2700	protein_coding	triosephosphate isomerase 1 [Source:HGNC Symbol;Acc:HGNC:12009]	-
ENSG00000139433	1086.08	1276.92	1167.29	1334.32	576.891	501.149	518.414	507.668	1216.15	526.031	1.20826	1.77755e-25	4.80521e-24	GLTP	12	109850943	109880488	-	2696	protein_coding	glycolipid transfer protein [Source:HGNC Symbol;Acc:HGNC:24867]	-
ENSG00000114023	657.816	616.325	627.801	716.798	1557.82	1787.74	1335.52	1543.63	654.685	1556.18	-1.24873	1.8803e-25	5.07681e-24	FAM162A	3	122384176	122412334	+	3793	protein_coding	family with sequence similarity 162 member A [Source:HGNC Symbol;Acc:HGNC:17865]	-
ENSG00000167136	249.251	219.629	287.408	269.22	621.431	940.151	890.344	721.965	256.377	793.473	-1.62851	1.90746e-25	5.14391e-24	ENDOG	9	128818474	128822677	+	1172	protein_coding	endonuclease G [Source:HGNC Symbol;Acc:HGNC:3346]	-
ENSG00000168566	580.728	655.483	416.661	512.359	172.855	150.742	145.339	181.064	541.308	162.5	1.73433	1.9217e-25	5.17605e-24	SNRNP48	6	7590199	7611967	+	5836	protein_coding	small nuclear ribonucleoprotein U11/U12 subunit 48 [Source:HGNC Symbol;Acc:HGNC:21368]	-
ENSG00000078403	435.974	559.289	463.224	504.787	156.948	153.386	155.639	200.546	490.819	166.63	1.55773	2.04115e-25	5.49115e-24	MLLT10	10	21524675	21743630	+	6945	protein_coding	MLLT10, histone lysine methyltransferase DOT1L cofactor [Source:HGNC Symbol;Acc:HGNC:16063]	Others
ENSG00000030419	149.893	285.178	196.69	207.804	43.4789	19.8344	27.4656	34.3793	209.891	31.2896	2.73261	2.13507e-25	5.73691e-24	IKZF2	2	212999691	213152427	-	12240	protein_coding	IKAROS family zinc finger 2 [Source:HGNC Symbol;Acc:HGNC:13177]	zf-C2H2
ENSG00000159199	1267.67	989.184	1046.07	1219.06	2396.64	3571.52	3158.55	3263.74	1130.49	3097.61	-1.45397	2.16943e-25	5.82221e-24	ATP5MC1	17	48892765	48895871	+	2615	protein_coding	ATP synthase membrane subunit c locus 1 [Source:HGNC Symbol;Acc:HGNC:841]	-
ENSG00000168701	429.122	264.747	299.45	344.938	915.179	1241.63	986.474	1076.07	334.564	1054.84	-1.65632	2.21266e-25	5.93111e-24	TMEM208	16	67227103	67229278	+	1787	protein_coding	transmembrane protein 208 [Source:HGNC Symbol;Acc:HGNC:25015]	-
ENSG00000053438	39.4004	43.4151	29.7042	31.9699	199.367	259.17	334.165	142.101	36.1224	233.701	-2.69423	2.23375e-25	5.98045e-24	NNAT	20	37521206	37523693	+	1332	protein_coding	neuronatin [Source:HGNC Symbol;Acc:HGNC:7860]	-
ENSG00000132964	383.726	448.623	452.788	391.21	161.19	125.618	152.205	145.539	419.087	146.138	1.51663	2.26448e-25	6.05545e-24	CDK8	13	26254104	26405238	+	3538	protein_coding	cyclin dependent kinase 8 [Source:HGNC Symbol;Acc:HGNC:1779]	-
ENSG00000111276	770.022	794.241	510.59	724.37	230.12	241.98	209.425	215.444	699.806	224.242	1.64229	2.28467e-25	6.10213e-24	CDKN1B	12	12715058	12722371	+	2811	protein_coding	cyclin dependent kinase inhibitor 1B [Source:HGNC Symbol;Acc:HGNC:1785]	-
ENSG00000203684	10.2784	5.95894	8.02815	7.57181	64.6882	129.585	98.4185	99.7	7.95932	98.0979	-3.61941	2.29159e-25	6.11329e-24	IBA57-DT	1	228164086	228165512	-	641	lincRNA	IBA57 divergent transcript [Source:HGNC Symbol;Acc:HGNC:32062]	-
ENSG00000136715	956.746	1021.53	895.139	1002	399.794	423.134	464.627	443.493	968.855	432.762	1.16277	2.33938e-25	6.23333e-24	SAP130	2	127941217	128028120	-	4373	protein_coding	Sin3A associated protein 130 [Source:HGNC Symbol;Acc:HGNC:29813]	-
ENSG00000126254	1008.99	731.247	935.279	896.839	2007.45	2548.06	2157.2	2241.53	893.09	2238.56	-1.3253	2.40743e-25	6.40699e-24	RBM42	19	35629030	35637686	+	2206	protein_coding	RNA binding motif protein 42 [Source:HGNC Symbol;Acc:HGNC:28117]	-
ENSG00000137502	334.047	423.085	207.126	309.603	69.9905	27.7682	42.3428	57.2988	318.465	49.3501	2.6788	2.44089e-25	6.48829e-24	RAB30	11	82973133	83071923	-	11832	protein_coding	RAB30, member RAS oncogene family [Source:HGNC Symbol;Acc:HGNC:9770]	-
ENSG00000105426	2396.57	4338.96	3620.7	4407.63	939.569	1150.4	1187.89	901.884	3690.97	1044.93	1.8209	2.54448e-25	6.75559e-24	PTPRS	19	5158495	5340803	-	8565	protein_coding	protein tyrosine phosphatase, receptor type S [Source:HGNC Symbol;Acc:HGNC:9681]	-
ENSG00000241468	1338.76	1338.21	991.476	1358.72	2773.11	3702.42	3343.94	3350.84	1256.79	3292.58	-1.38941	2.58811e-25	6.86327e-24	ATP5MF	7	99448475	99466331	-	2275	protein_coding	ATP synthase membrane subunit f [Source:HGNC Symbol;Acc:HGNC:848]	-
ENSG00000005243	320.343	317.526	346.816	357.558	746.565	1056.51	831.98	882.402	335.561	879.365	-1.38854	2.62219e-25	6.94538e-24	COPZ2	17	48026167	48038030	-	1851	protein_coding	coatomer protein complex subunit zeta 2 [Source:HGNC Symbol;Acc:HGNC:19356]	-
ENSG00000182957	268.951	308.162	283.394	301.19	91.1997	40.9911	75.5305	52.7149	290.424	65.1091	2.14607	2.66417e-25	7.0482e-24	SPATA13	13	23979805	24307074	+	9948	protein_coding	spermatogenesis associated 13 [Source:HGNC Symbol;Acc:HGNC:23222]	-
ENSG00000188064	667.238	720.18	691.224	885.902	244.967	210.245	240.324	307.122	741.136	250.664	1.56239	2.73002e-25	7.21384e-24	WNT7B	22	45920362	45977129	-	5051	protein_coding	Wnt family member 7B [Source:HGNC Symbol;Acc:HGNC:12787]	-
ENSG00000079432	1795.29	1647.22	1589.57	1682.62	698.845	743.129	869.745	728.841	1678.68	760.14	1.14304	2.77175e-25	7.31546e-24	CIC	19	42268537	42295797	+	9494	protein_coding	capicua transcriptional repressor [Source:HGNC Symbol;Acc:HGNC:14214]	HMG
ENSG00000177600	13624.8	11114.3	11272.3	13622.5	28431	38732.6	27743.7	33404.1	12408.5	32077.9	-1.37023	2.82319e-25	7.4424e-24	RPLP2	11	809647	812880	+	1955	protein_coding	ribosomal protein lateral stalk subunit P2 [Source:HGNC Symbol;Acc:HGNC:10377]	-
ENSG00000198380	1125.48	1130.5	991.476	994.431	496.296	448.258	375.364	403.384	1060.47	430.825	1.29912	2.87039e-25	7.5579e-24	GFPT1	2	69319769	69387254	-	8866	protein_coding	glutamine--fructose-6-phosphate transaminase 1 [Source:HGNC Symbol;Acc:HGNC:4241]	-
ENSG00000244187	646.681	489.484	584.449	523.296	1261.95	1769.23	1425.92	1582.59	560.978	1509.92	-1.42785	2.88687e-25	7.59234e-24	TMEM141	9	136791355	136793257	+	1443	protein_coding	transmembrane protein 141 [Source:HGNC Symbol;Acc:HGNC:28211]	-
ENSG00000112306	11433.8	9958.24	9906.74	10817.6	23003.5	31864.6	22846.8	25936.9	10529.1	25913	-1.29925	3.25475e-25	8.54636e-24	RPS12	6	132814441	132817564	+	767	protein_coding	ribosomal protein S12 [Source:HGNC Symbol;Acc:HGNC:10385]	-
ENSG00000167526	27099.8	21506.7	25246.9	27415.8	54784.5	86456.9	66746.1	69786.6	25317.3	69443.5	-1.4557	3.25729e-25	8.54636e-24	RPL13	16	89560657	89566828	+	6172	protein_coding	ribosomal protein L13 [Source:HGNC Symbol;Acc:HGNC:10303]	-
ENSG00000131143	7378.16	6542.91	7380.28	8012.66	14814.7	20137.2	16346.6	17122	7328.5	17105.1	-1.22277	3.34496e-25	8.76607e-24	COX4I1	16	85798633	85807044	+	4792	protein_coding	cytochrome c oxidase subunit 4I1 [Source:HGNC Symbol;Acc:HGNC:2265]	-
ENSG00000140319	3229.98	2972.66	2430.12	2913.46	6407.31	8334.42	6560.85	6934.31	2886.56	7059.22	-1.29009	3.47999e-25	9.10924e-24	SRP14	15	40035739	40039188	-	2005	protein_coding	signal recognition particle 14 [Source:HGNC Symbol;Acc:HGNC:11299]	-
ENSG00000151693	512.206	642.714	643.858	608.269	209.972	218.179	256.346	217.736	601.762	225.558	1.41588	3.54958e-25	9.26968e-24	ASAP2	2	9206765	9405683	+	7257	protein_coding	ArfGAP with SH3 domain, ankyrin repeat and PH domain 2 [Source:HGNC Symbol;Acc:HGNC:2721]	-
ENSG00000139517	695.504	776.365	414.252	641.08	183.46	119.006	159.072	158.145	631.8	154.921	2.02437	3.5496e-25	9.26968e-24	LNX2	13	27545911	27620404	-	4692	protein_coding	ligand of numb-protein X 2 [Source:HGNC Symbol;Acc:HGNC:20421]	-
ENSG00000006062	406.852	424.787	399.802	436.641	113.469	83.3045	155.639	134.079	417.021	121.623	1.77319	3.71301e-25	9.6851e-24	MAP3K14	17	45263119	45317145	-	5784	protein_coding	mitogen-activated protein kinase kinase kinase 14 [Source:HGNC Symbol;Acc:HGNC:6853]	-
ENSG00000100804	1653.96	1519.53	1665.04	1664.96	3091.25	3498.79	3341.65	3899.76	1625.87	3457.86	-1.08853	3.78385e-25	9.85833e-24	PSMB5	14	23016543	23035230	-	1765	protein_coding	proteasome subunit beta 5 [Source:HGNC Symbol;Acc:HGNC:9542]	-
ENSG00000135446	863.384	808.713	917.617	763.07	1726.43	2130.22	1789.84	1922.95	838.196	1892.36	-1.17424	3.82928e-25	9.96505e-24	CDK4	12	57747727	57756013	-	3168	protein_coding	cyclin dependent kinase 4 [Source:HGNC Symbol;Acc:HGNC:1773]	-
ENSG00000167487	407.709	354.131	317.112	371.019	112.409	75.3708	127.029	101.992	362.493	104.2	1.7927	3.88592e-25	1.01007e-23	KLHL26	19	18636965	18671714	+	4797	protein_coding	kelch like family member 26 [Source:HGNC Symbol;Acc:HGNC:25623]	-
ENSG00000198576	15.4176	16.1743	5.6197	19.3502	98.623	128.263	111.007	130.641	14.1404	117.133	-3.05493	3.97734e-25	1.03263e-23	ARC	8	142611044	142614472	-	2991	protein_coding	activity regulated cytoskeleton associated protein [Source:HGNC Symbol;Acc:HGNC:648]	-
ENSG00000136810	6845.4	7765.35	7018.21	8312.16	16851.8	18588.8	14430.9	17573.6	7485.28	16861.3	-1.17156	4.39677e-25	1.1402e-23	TXN	9	110243811	110256640	-	1142	protein_coding	thioredoxin [Source:HGNC Symbol;Acc:HGNC:12435]	-
ENSG00000164919	1640.26	1721.28	1555.86	1643.08	4430.61	5044.55	3315.33	3932.99	1640.12	4180.87	-1.34987	4.4408e-25	1.15028e-23	COX6C	8	99873200	99894062	-	3066	protein_coding	cytochrome c oxidase subunit 6C [Source:HGNC Symbol;Acc:HGNC:2285]	-
ENSG00000143367	1817.56	1737.46	1129.56	1814.71	506.901	384.788	552.746	523.711	1624.82	492.036	1.72224	4.56552e-25	1.18121e-23	TUFT1	1	151540305	151583583	+	3878	protein_coding	tuftelin 1 [Source:HGNC Symbol;Acc:HGNC:12422]	-
ENSG00000072201	235.546	224.737	136.479	220.424	36.0557	39.6688	30.8988	43.5471	204.296	37.5426	2.44526	4.90324e-25	1.26657e-23	LNX1	4	53459301	53701405	-	5725	protein_coding	ligand of numb-protein X 1 [Source:HGNC Symbol;Acc:HGNC:6657]	-
ENSG00000176101	1077.52	913.42	1002.72	1143.34	2076.38	2628.72	2460.46	2387.07	1034.25	2388.16	-1.207	4.9068e-25	1.26657e-23	SSNA1	9	137188647	137190370	+	1183	protein_coding	SS nuclear autoantigen 1 [Source:HGNC Symbol;Acc:HGNC:11321]	-
ENSG00000054523	742.613	914.271	784.35	837.105	343.59	304.128	360.486	350.669	819.585	339.718	1.26922	4.9312e-25	1.27139e-23	KIF1B	1	10210805	10381603	+	17720	protein_coding	kinesin family member 1B [Source:HGNC Symbol;Acc:HGNC:16636]	-
ENSG00000196262	33072.4	31447	28263.9	33199.9	63250.2	79760.8	63494.8	74692.5	31495.8	70299.6	-1.15835	5.04622e-25	1.29955e-23	PPIA	7	44796680	44824564	+	4432	protein_coding	peptidylprolyl isomerase A [Source:HGNC Symbol;Acc:HGNC:9253]	-
ENSG00000128607	801.713	905.759	667.942	694.924	316.018	234.046	220.869	253.261	767.584	256.049	1.58171	5.06563e-25	1.30304e-23	KLHDC10	7	130070510	130135720	+	6622	protein_coding	kelch domain containing 10 [Source:HGNC Symbol;Acc:HGNC:22194]	-
ENSG00000182117	827.409	656.335	645.463	774.848	1558.88	1700.47	1815.02	1893.15	726.014	1741.88	-1.26269	5.30006e-25	1.36177e-23	NOP10	15	34341713	34343177	-	554	protein_coding	NOP10 ribonucleoprotein [Source:HGNC Symbol;Acc:HGNC:14378]	-
ENSG00000089220	1970.02	1776.62	1788.67	1914.83	3558.91	4390.02	3714.73	4049.88	1862.53	3928.38	-1.07645	5.65206e-25	1.45054e-23	PEBP1	12	118135858	118145584	+	1780	protein_coding	phosphatidylethanolamine binding protein 1 [Source:HGNC Symbol;Acc:HGNC:8630]	-
ENSG00000184148	18.8437	21.2819	30.507	19.3502	121.953	144.13	127.029	118.036	22.4957	127.787	-2.50045	6.09278e-25	1.56185e-23	SPRR4	1	152970666	152972574	+	733	protein_coding	small proline rich protein 4 [Source:HGNC Symbol;Acc:HGNC:23173]	-
ENSG00000011021	752.891	831.698	705.674	786.627	267.236	318.673	347.898	315.144	769.222	312.238	1.30174	6.31016e-25	1.61572e-23	CLCN6	1	11806096	11848079	+	8174	protein_coding	chloride voltage-gated channel 6 [Source:HGNC Symbol;Acc:HGNC:2024]	-
ENSG00000243199	191.863	181.322	158.155	160.691	533.412	593.71	446.316	762.075	173.008	583.878	-1.75497	6.39324e-25	1.63512e-23	AC115223.1	4	65573459	65574328	+	870	processed_pseudogene	ribosomal protein L6 (RPL6) pseudogene	-
ENSG00000128268	89.9358	114.071	94.7322	106.005	9.54416	9.25606	1.1444	8.02184	101.186	6.99161	3.85986	6.7068e-25	1.71335e-23	MGAT3	22	39457344	39492194	+	5457	protein_coding	mannosyl (beta-1,4-)-glycoprotein beta-1,4-N-acetylglucosaminyltransferase [Source:HGNC Symbol;Acc:HGNC:7046]	-
ENSG00000175215	3791.01	3707.31	3341.32	3529.3	1263.01	698.171	1266.85	1227.34	3592.23	1113.84	1.68837	6.86776e-25	1.75246e-23	CTDSP2	12	57819927	57846739	-	5442	protein_coding	CTD small phosphatase 2 [Source:HGNC Symbol;Acc:HGNC:17077]	-
ENSG00000125249	636.403	763.595	512.196	662.954	232.241	177.187	230.025	207.422	643.787	211.719	1.60172	7.01874e-25	1.78824e-23	RAP2A	13	97434222	97469128	+	5570	protein_coding	RAP2A, member of RAS oncogene family [Source:HGNC Symbol;Acc:HGNC:9861]	-
ENSG00000138085	808.566	664.847	780.336	747.085	1671.29	2290.21	1702.87	1885.13	750.209	1887.38	-1.3304	7.02402e-25	1.78824e-23	ATRAID	2	27212027	27217178	+	2019	protein_coding	all-trans retinoic acid induced differentiation factor [Source:HGNC Symbol;Acc:HGNC:24090]	-
ENSG00000101608	1129.76	988.333	985.857	1039.86	2275.75	2645.91	2040.47	2306.85	1035.95	2317.25	-1.16119	7.08905e-25	1.80274e-23	MYL12A	18	3247481	3256236	+	3245	protein_coding	myosin light chain 12A [Source:HGNC Symbol;Acc:HGNC:16701]	-
ENSG00000141034	454.818	578.868	482.492	471.135	143.162	93.8829	154.494	175.334	496.828	141.718	1.80513	7.14316e-25	1.81443e-23	GID4	17	18039292	18068404	+	5210	protein_coding	GID complex subunit 4 homolog [Source:HGNC Symbol;Acc:HGNC:28453]	-
ENSG00000137970	919.058	796.795	712.097	722.687	2126.23	2526.9	1748.65	1984.83	787.659	2096.65	-1.41226	7.54896e-25	1.91532e-23	RPL7P9	1	96678874	96679620	-	747	processed_pseudogene	ribosomal protein L7 pseudogene 9 [Source:HGNC Symbol;Acc:HGNC:37028]	-
ENSG00000164111	2029.98	2021.78	1833.63	1927.45	3798.58	4322.58	3702.14	3817.25	1953.21	3910.14	-1.00122	7.81581e-25	1.98077e-23	ANXA5	4	121667955	121697113	-	3034	protein_coding	annexin A5 [Source:HGNC Symbol;Acc:HGNC:543]	-
ENSG00000102189	305.782	483.525	297.042	365.971	107.107	87.2714	88.1189	77.9264	363.08	90.1059	2.00824	7.82523e-25	1.98091e-23	EEA1	12	92770637	92929331	-	10150	protein_coding	early endosome antigen 1 [Source:HGNC Symbol;Acc:HGNC:3185]	-
ENSG00000235859	413.705	402.654	280.182	425.704	103.925	112.395	105.285	119.182	380.561	110.197	1.78842	7.96096e-25	2.01299e-23	AC006978.1	7	30371508	30372741	+	1234	processed_pseudogene	proteasome (prosome, macropain) 26S subunit, ATPase, 5 (PSMC5) pseudogene	-
ENSG00000185513	281.799	247.722	248.873	242.298	81.6556	81.9822	77.8193	76.7805	255.173	79.5594	1.68161	8.55907e-25	2.16177e-23	L3MBTL1	20	43489442	43550950	+	15550	protein_coding	L3MBTL1, histone methyl-lysine binding protein [Source:HGNC Symbol;Acc:HGNC:15905]	zf-C2HC
ENSG00000143376	853.105	870.005	668.745	809.342	331.925	238.013	305.555	287.64	800.299	290.783	1.45779	8.75857e-25	2.20966e-23	SNX27	1	151612006	151699091	+	16711	protein_coding	sorting nexin family member 27 [Source:HGNC Symbol;Acc:HGNC:20073]	-
ENSG00000274267	1.71306	4.25638	0.802815	2.52394	74.2324	93.8829	76.6749	84.8023	2.32405	82.3981	-5.15718	8.81985e-25	2.2226e-23	HIST1H3B	6	26031650	26032060	-	411	protein_coding	histone cluster 1 H3 family member b [Source:HGNC Symbol;Acc:HGNC:4776]	-
ENSG00000137203	1087.79	1360.34	1255.6	1209.81	512.203	338.507	486.371	457.245	1228.39	448.581	1.45115	8.93605e-25	2.24934e-23	TFAP2A	6	10393186	10419659	-	8274	protein_coding	transcription factor AP-2 alpha [Source:HGNC Symbol;Acc:HGNC:11742]	AP-2
ENSG00000173402	5463.81	5409.87	4489.34	4746.68	2316.05	1949.06	2463.9	2153.29	5027.43	2220.57	1.17853	9.18615e-25	2.30969e-23	DAG1	3	49468703	49535618	+	6923	protein_coding	dystroglycan 1 [Source:HGNC Symbol;Acc:HGNC:2666]	-
ENSG00000065978	9983.73	9570.06	9378.48	9376.42	18317.4	22617.8	18654.9	18794	9577.17	19596	-1.03283	1.02089e-24	2.56396e-23	YBX1	1	42682427	42702349	+	1930	protein_coding	Y-box binding protein 1 [Source:HGNC Symbol;Acc:HGNC:8014]	CSD
ENSG00000170889	12939.6	12042.2	12436.4	14693.5	26811.7	36549.5	28663.8	30583.8	13027.9	30652.2	-1.23435	1.04642e-24	2.62511e-23	RPS9	19	54200742	54249003	+	4371	protein_coding	ribosomal protein S9 [Source:HGNC Symbol;Acc:HGNC:10442]	-
ENSG00000116741	111.349	108.112	61.8167	93.3856	359.497	398.011	302.122	349.523	93.6659	352.288	-1.91233	1.11697e-24	2.79894e-23	RGS2	1	192809039	192812283	+	2096	protein_coding	regulator of G protein signaling 2 [Source:HGNC Symbol;Acc:HGNC:9998]	-
ENSG00000001617	1652.25	1763.85	1619.28	1767.6	803.83	903.127	843.424	827.395	1700.74	844.444	1.01076	1.21419e-24	3.0376e-23	SEMA3F	3	50155045	50189075	+	4826	protein_coding	semaphorin 3F [Source:HGNC Symbol;Acc:HGNC:10728]	-
ENSG00000168393	491.649	476.715	517.816	495.533	1065.76	1225.77	1019.66	1320.17	495.428	1157.84	-1.22417	1.21493e-24	3.0376e-23	DTYMK	2	241675742	241686991	-	2451	protein_coding	deoxythymidylate kinase [Source:HGNC Symbol;Acc:HGNC:3061]	-
ENSG00000285230	30.8351	22.1332	23.2816	30.2872	148.465	136.196	159.072	113.452	26.6343	139.296	-2.38862	1.29557e-24	3.2356e-23	RALY-AS1	20	33980687	33994357	-	8836	lincRNA	RALY antisense RNA 1 [Source:HGNC Symbol;Acc:HGNC:50743]	-
ENSG00000164142	297.216	391.587	198.295	232.202	56.2045	62.1478	35.4764	44.6931	279.825	49.6305	2.49818	1.32607e-24	3.30805e-23	FAM160A1	4	151409216	151663632	+	4932	protein_coding	family with sequence similarity 160 member A1 [Source:HGNC Symbol;Acc:HGNC:34237]	-
ENSG00000066084	1060.39	1277.77	916.012	1055.01	442.213	273.715	361.631	341.501	1077.29	354.765	1.59986	1.33229e-24	3.31986e-23	DIP2B	12	50504985	50748667	+	10361	protein_coding	disco interacting protein 2 homolog B [Source:HGNC Symbol;Acc:HGNC:29284]	-
ENSG00000143515	1075.8	1142.41	1019.57	1036.5	487.813	534.207	498.959	509.96	1068.57	507.735	1.07423	1.33452e-24	3.3217e-23	ATP8B2	1	154325553	154351307	+	7572	protein_coding	ATPase phospholipid transporting 8B2 [Source:HGNC Symbol;Acc:HGNC:13534]	-
ENSG00000178896	141.328	129.394	171.802	146.388	399.794	446.935	615.688	658.937	147.228	530.339	-1.8484	1.36728e-24	3.39945e-23	EXOSC4	8	144078626	144080647	+	1407	protein_coding	exosome component 4 [Source:HGNC Symbol;Acc:HGNC:18189]	-
ENSG00000163545	1451.82	1165.4	704.069	1307.4	261.934	179.832	326.154	275.034	1157.17	260.739	2.14807	1.4229e-24	3.5338e-23	NUAK2	1	205302059	205321791	-	3441	protein_coding	NUAK family kinase 2 [Source:HGNC Symbol;Acc:HGNC:29558]	-
ENSG00000073712	213.276	220.481	181.436	190.978	38.1766	42.3134	57.2201	56.1529	201.543	48.4657	2.05535	1.56835e-24	3.89069e-23	FERMT2	14	52857268	52952435	-	8510	protein_coding	fermitin family member 2 [Source:HGNC Symbol;Acc:HGNC:15767]	-
ENSG00000106153	6822.27	5449.02	5675.1	5962.38	12543.1	18412.9	14154	15381.3	5977.19	15122.8	-1.33912	1.60973e-24	3.98891e-23	CHCHD2	7	56101569	56106576	-	1132	protein_coding	coiled-coil-helix-coiled-coil-helix domain containing 2 [Source:HGNC Symbol;Acc:HGNC:21645]	-
ENSG00000117407	901.928	824.887	1005.12	972.557	373.283	413.878	425.717	397.654	926.124	402.633	1.20259	1.71873e-24	4.25429e-23	ARTN	1	43933320	43937241	+	2658	protein_coding	artemin [Source:HGNC Symbol;Acc:HGNC:727]	-
ENSG00000135540	376.017	426.49	419.872	440.006	170.734	111.073	132.751	137.517	415.596	138.019	1.58505	1.77918e-24	4.39902e-23	NHSL1	6	138422043	138692571	-	8741	protein_coding	NHS like 1 [Source:HGNC Symbol;Acc:HGNC:21021]	-
ENSG00000102349	342.613	456.284	326.746	376.908	121.953	121.651	124.74	115.744	375.638	121.022	1.63382	1.85617e-24	4.58431e-23	KLF8	X	56232421	56287889	+	9022	protein_coding	Kruppel like factor 8 [Source:HGNC Symbol;Acc:HGNC:6351]	zf-C2H2
ENSG00000130518	5.13919	3.40511	4.01407	4.20656	68.93	80.6599	107.574	64.1747	4.19123	80.3346	-4.26088	1.86928e-24	4.61157e-23	IQCN	19	18257097	18274509	-	9154	protein_coding	IQ motif containing N [Source:HGNC Symbol;Acc:HGNC:29350]	-
ENSG00000273117	64.2399	74.9124	101.957	79.9246	285.264	498.505	292.967	342.647	80.2586	354.846	-2.14076	1.91651e-24	4.72287e-23	AC144652.1	7	155295918	155297541	-	1624	lincRNA	novel transcript	-
ENSG00000146109	305.782	276.665	305.872	265.855	647.942	725.939	940.698	864.067	288.543	794.662	-1.46143	1.91936e-24	4.72467e-23	ABT1	6	26596952	26600744	+	2949	protein_coding	activator of basal transcription 1 [Source:HGNC Symbol;Acc:HGNC:17369]	-
ENSG00000124160	55.6745	91.9379	89.9153	90.8617	426.306	241.98	542.446	505.376	82.0974	429.027	-2.3864	1.92875e-24	4.74255e-23	NCOA5	20	46060985	46089952	-	3220	protein_coding	nuclear receptor coactivator 5 [Source:HGNC Symbol;Acc:HGNC:15909]	-
ENSG00000172992	1227.41	1021.53	842.956	1097.91	322.38	444.291	337.598	354.107	1047.45	364.594	1.52446	1.944e-24	4.77479e-23	DCAKD	17	45023340	45061109	-	2834	protein_coding	dephospho-CoA kinase domain containing [Source:HGNC Symbol;Acc:HGNC:26238]	-
ENSG00000126432	6563.6	5575.01	6185.69	7514.6	13296.1	18900.9	16479.4	16743.9	6459.73	16355	-1.34014	1.95256e-24	4.79054e-23	PRDX5	11	64318088	64321811	+	893	protein_coding	peroxiredoxin 5 [Source:HGNC Symbol;Acc:HGNC:9355]	-
ENSG00000164626	1190.58	1180.72	704.871	1266.17	214.213	271.07	361.631	260.137	1085.59	276.763	1.97214	1.99159e-24	4.88093e-23	KCNK5	6	39188973	39229450	-	3756	protein_coding	potassium two pore domain channel subfamily K member 5 [Source:HGNC Symbol;Acc:HGNC:6280]	-
ENSG00000179456	161.884	140.461	101.957	117.784	22.2697	14.5452	14.8772	18.3356	130.522	17.5069	2.88754	2.03708e-24	4.98693e-23	ZBTB18	1	244048939	244057476	+	3906	protein_coding	zinc finger and BTB domain containing 18 [Source:HGNC Symbol;Acc:HGNC:13030]	ZBTB
ENSG00000165355	288.651	252.829	183.042	255.759	50.9022	34.3796	53.7869	67.6126	245.07	51.6703	2.23844	2.15373e-24	5.26672e-23	FBXO33	14	39397669	39432500	-	3853	protein_coding	F-box protein 33 [Source:HGNC Symbol;Acc:HGNC:19833]	-
ENSG00000137210	311.777	288.583	267.337	278.474	681.877	696.849	601.955	684.148	286.543	666.207	-1.21732	2.15848e-24	5.27256e-23	TMEM14B	6	10747759	10852753	+	4815	protein_coding	transmembrane protein 14B [Source:HGNC Symbol;Acc:HGNC:21384]	-
ENSG00000108298	29821	27106.4	26612.5	30417.6	55699.7	75160.5	59754.9	67382.3	28489.4	64499.4	-1.17885	2.17423e-24	5.30522e-23	RPL19	17	39200283	39204732	+	1761	protein_coding	ribosomal protein L19 [Source:HGNC Symbol;Acc:HGNC:10312]	-
ENSG00000170684	232.12	128.543	112.394	172.469	533.412	911.061	773.615	686.44	161.381	726.132	-2.16976	2.21786e-24	5.40576e-23	ZNF296	19	45071500	45076588	-	1744	protein_coding	zinc finger protein 296 [Source:HGNC Symbol;Acc:HGNC:15981]	zf-C2H2
ENSG00000124788	613.277	732.098	466.435	619.206	166.493	230.079	149.917	165.021	607.754	177.877	1.77596	2.37636e-24	5.78576e-23	ATXN1	6	16299112	16761491	-	17812	protein_coding	ataxin 1 [Source:HGNC Symbol;Acc:HGNC:10548]	-
ENSG00000162302	2007.71	1579.12	2050.39	1803.77	3812.36	4470.68	4331.56	4064.78	1860.25	4169.84	-1.1643	2.43779e-24	5.92886e-23	RPS6KA4	11	64359148	64372215	+	3807	protein_coding	ribosomal protein S6 kinase A4 [Source:HGNC Symbol;Acc:HGNC:10433]	-
ENSG00000109046	1046.68	1016.42	819.674	903.569	388.129	286.938	382.23	279.618	946.587	334.229	1.49987	2.47987e-24	6.02461e-23	WSB1	17	27294076	27315926	+	8602	protein_coding	WD repeat and SOCS box containing 1 [Source:HGNC Symbol;Acc:HGNC:19221]	-
ENSG00000138771	932.763	916.825	957.758	831.216	404.036	351.73	424.573	419.428	909.641	399.942	1.18416	2.52578e-24	6.12948e-23	SHROOM3	4	76435100	76783253	+	13958	protein_coding	shroom family member 3 [Source:HGNC Symbol;Acc:HGNC:30422]	-
ENSG00000179271	645.825	445.218	627.801	485.437	1507.98	1951.71	1368.7	1693.75	551.07	1630.54	-1.5645	2.81387e-24	6.81378e-23	GADD45GIP1	19	12953119	12957236	-	1782	protein_coding	GADD45G interacting protein 1 [Source:HGNC Symbol;Acc:HGNC:29996]	-
ENSG00000109819	104.497	132.799	78.6759	117.784	10.6046	10.5784	6.86641	11.4598	108.439	9.87729	3.45704	2.83749e-24	6.86264e-23	PPARGC1A	4	23755041	23904089	-	10870	protein_coding	PPARG coactivator 1 alpha [Source:HGNC Symbol;Acc:HGNC:9237]	-
ENSG00000089157	38172.2	33639.9	36825.1	37994.5	70646.9	107227	88158.9	96302.2	36657.9	90583.9	-1.30512	2.8402e-24	6.86264e-23	RPLP0	12	120196686	120201235	-	4001	protein_coding	ribosomal protein lateral stalk subunit P0 [Source:HGNC Symbol;Acc:HGNC:10371]	-
ENSG00000204673	764.026	708.262	840.547	704.178	1559.94	2344.43	2110.28	1894.3	754.253	1977.24	-1.38972	2.93793e-24	7.09109e-23	AKT1S1	19	49869033	49878459	-	5737	protein_coding	AKT1 substrate 1 [Source:HGNC Symbol;Acc:HGNC:28426]	-
ENSG00000140464	8782.87	7453.78	6136.72	7707.26	3076.4	3102.1	3429.77	3307.29	7520.16	3228.89	1.21967	3.08111e-24	7.42863e-23	PML	15	73994673	74047812	+	12657	protein_coding	promyelocytic leukemia [Source:HGNC Symbol;Acc:HGNC:9113]	-
ENSG00000100100	3335.33	2489.13	1718.83	2560.95	740.203	878.003	702.662	639.455	2526.06	740.081	1.77158	3.13939e-24	7.56097e-23	PIK3IP1	22	31281593	31292534	-	3805	protein_coding	phosphoinositide-3-kinase interacting protein 1 [Source:HGNC Symbol;Acc:HGNC:24942]	-
ENSG00000141568	1564.88	1494.84	1340.7	1485.76	530.231	314.706	572.201	495.062	1471.55	478.05	1.62	3.16481e-24	7.61398e-23	FOXK2	17	82519713	82644662	+	9991	protein_coding	forkhead box K2 [Source:HGNC Symbol;Acc:HGNC:6036]	Fork
ENSG00000151893	1328.48	1445.47	1126.35	1289.73	599.161	479.993	509.259	572.988	1297.51	540.35	1.26242	3.17198e-24	7.62301e-23	CACUL1	10	118674167	118755249	-	12406	protein_coding	CDK2 associated cullin domain 1 [Source:HGNC Symbol;Acc:HGNC:23727]	-
ENSG00000058668	4006.85	4979.12	3500.27	3851.53	1794.3	1738.82	1631.92	1468	4084.44	1658.26	1.30045	3.36165e-24	8.07014e-23	ATP2B4	1	203626561	203744081	+	9721	protein_coding	ATPase plasma membrane Ca2+ transporting 4 [Source:HGNC Symbol;Acc:HGNC:817]	-
ENSG00000187210	413.705	553.33	403.013	522.455	132.558	46.2803	107.574	97.408	473.126	95.955	2.29328	3.43377e-24	8.23441e-23	GCNT1	9	76419850	76651203	+	9251	protein_coding	glucosaminyl (N-acetyl) transferase 1, core 2 [Source:HGNC Symbol;Acc:HGNC:4203]	-
ENSG00000162928	841.114	1064.1	780.336	1049.12	353.134	198.344	284.956	284.202	933.666	280.159	1.7334	3.47997e-24	8.33623e-23	PEX13	2	61017225	61051990	+	5910	protein_coding	peroxisomal biogenesis factor 13 [Source:HGNC Symbol;Acc:HGNC:8855]	-
ENSG00000143630	627.838	638.458	478.478	529.185	167.553	144.13	226.591	143.247	568.49	170.38	1.7364	3.55869e-24	8.51566e-23	HCN3	1	155277583	155289848	+	4121	protein_coding	hyperpolarization activated cyclic nucleotide gated potassium channel 3 [Source:HGNC Symbol;Acc:HGNC:19183]	-
ENSG00000111775	1422.7	1213.92	1164.08	1316.65	2821.89	4327.87	3099.04	3409.28	1279.34	3414.52	-1.416	3.62209e-24	8.65809e-23	COX6A1	12	120438090	120440742	+	1344	protein_coding	cytochrome c oxidase subunit 6A1 [Source:HGNC Symbol;Acc:HGNC:2277]	-
ENSG00000104529	1332.76	1222.43	1327.05	1344.42	2887.64	3853.17	2955.99	2760.66	1306.67	3114.36	-1.25265	3.73059e-24	8.90788e-23	EEF1D	8	143579697	143599541	-	9390	protein_coding	eukaryotic translation elongation factor 1 delta [Source:HGNC Symbol;Acc:HGNC:3211]	-
ENSG00000189060	13610.3	12364.8	8352.49	11947.5	4653.31	4281.59	3648.35	3742.76	11568.8	4081.5	1.50303	3.78277e-24	9.02281e-23	H1F0	22	37805093	37807436	+	2344	protein_coding	H1 histone family member 0 [Source:HGNC Symbol;Acc:HGNC:4714]	-
ENSG00000101544	1215.42	1196.04	842.153	961.62	272.539	154.708	330.732	300.246	1053.81	264.556	1.99122	3.8373e-24	9.14311e-23	ADNP2	18	80109031	80147523	+	5893	protein_coding	ADNP homeobox 2 [Source:HGNC Symbol;Acc:HGNC:23803]	Others
ENSG00000061273	1403	1363.75	1441.05	1462.2	593.859	494.538	687.785	648.623	1417.5	606.201	1.22427	3.91857e-24	9.32678e-23	HDAC7	12	47782722	47833132	-	9928	protein_coding	histone deacetylase 7 [Source:HGNC Symbol;Acc:HGNC:14067]	-
ENSG00000196890	24.8394	19.5794	14.4507	21.8741	101.804	126.94	128.173	115.744	20.1859	118.165	-2.55105	3.98861e-24	9.48338e-23	HIST3H2BB	1	228458107	228460470	+	2364	protein_coding	histone cluster 3 H2B family member b [Source:HGNC Symbol;Acc:HGNC:20514]	-
ENSG00000129657	935.332	894.692	826.097	851.408	414.641	383.465	424.573	391.924	876.882	403.651	1.11836	4.09252e-24	9.72007e-23	SEC14L1	17	77088749	77217101	+	10356	protein_coding	SEC14 like lipid binding 1 [Source:HGNC Symbol;Acc:HGNC:10698]	-
ENSG00000137413	385.439	432.449	472.858	506.47	172.855	111.073	123.595	150.123	449.304	139.412	1.68369	4.29998e-24	1.02019e-22	TAF8	6	42050513	42087461	+	9286	protein_coding	TATA-box binding protein associated factor 8 [Source:HGNC Symbol;Acc:HGNC:17300]	-
ENSG00000051523	1497.22	1272.66	1435.43	1757.5	3140.03	4535.47	3957.34	3997.17	1490.7	3907.5	-1.39002	4.34656e-24	1.03015e-22	CYBA	16	88643283	88651152	-	3357	protein_coding	cytochrome b-245 alpha chain [Source:HGNC Symbol;Acc:HGNC:2577]	-
ENSG00000121671	1074.95	977.266	762.674	982.652	249.209	103.139	264.357	225.757	949.385	210.615	2.16843	4.57512e-24	1.08317e-22	CRY2	11	45847118	45883248	+	6200	protein_coding	cryptochrome circadian regulator 2 [Source:HGNC Symbol;Acc:HGNC:2385]	-
ENSG00000204842	570.45	695.493	543.506	545.17	231.181	198.344	224.303	237.217	588.655	222.761	1.4	4.60482e-24	1.08904e-22	ATXN2	12	111443485	111599676	-	16504	protein_coding	ataxin 2 [Source:HGNC Symbol;Acc:HGNC:10555]	-
ENSG00000165185	123.341	128.543	102.76	149.754	22.2697	14.5452	19.4548	19.4816	126.099	18.9378	2.72422	4.88626e-24	1.15438e-22	KIAA1958	9	112486847	112669397	+	13119	protein_coding	KIAA1958 [Source:HGNC Symbol;Acc:HGNC:23427]	-
ENSG00000105401	3348.18	2753.88	3460.94	3228.11	6376.56	8951.93	8223.67	7492.4	3197.78	7761.14	-1.27904	4.96172e-24	1.17097e-22	CDC37	19	10391134	10420121	-	3041	protein_coding	cell division cycle 37 [Source:HGNC Symbol;Acc:HGNC:1735]	-
ENSG00000166226	1849.25	1535.7	1664.24	1477.34	3340.46	3469.7	3311.9	3780.58	1631.63	3475.66	-1.09095	5.00863e-24	1.18079e-22	CCT2	12	69585334	69601570	+	4322	protein_coding	chaperonin containing TCP1 subunit 2 [Source:HGNC Symbol;Acc:HGNC:1615]	-
ENSG00000165861	723.769	589.935	541.9	667.16	172.855	162.642	252.913	215.444	630.691	200.963	1.64847	5.04563e-24	1.18825e-22	ZFYVE1	14	72969451	73027212	-	5306	protein_coding	zinc finger FYVE-type containing 1 [Source:HGNC Symbol;Acc:HGNC:13180]	-
ENSG00000196526	898.501	1076.87	934.477	991.907	447.515	435.035	428.006	360.983	975.438	417.885	1.22295	5.18007e-24	1.21863e-22	AFAP1	4	7758714	7939926	-	10036	protein_coding	actin filament associated protein 1 [Source:HGNC Symbol;Acc:HGNC:24017]	-
ENSG00000163362	3000.43	2758.14	2064.84	2761.19	932.146	571.231	988.763	759.783	2646.15	812.981	1.70151	5.22364e-24	1.22758e-22	INAVA	1	200891048	200915735	+	5413	protein_coding	innate immunity activator [Source:HGNC Symbol;Acc:HGNC:25599]	-
ENSG00000196683	2578.16	2404.01	2407.64	2819.24	5075.37	5574.79	4957.55	6046.17	2552.26	5413.47	-1.08474	5.24087e-24	1.23034e-22	TOMM7	7	22812628	22822852	-	1751	protein_coding	translocase of outer mitochondrial membrane 7 [Source:HGNC Symbol;Acc:HGNC:21648]	-
ENSG00000179912	614.133	694.642	537.083	637.715	252.39	249.914	195.693	237.217	620.893	233.803	1.40922	5.50885e-24	1.29189e-22	R3HDM2	12	57253762	57431005	-	5903	protein_coding	R3H domain containing 2 [Source:HGNC Symbol;Acc:HGNC:29167]	-
ENSG00000063244	2049.68	1808.96	1783.05	1839.95	3599.21	3567.55	4045.46	4175.94	1870.41	3847.04	-1.04052	5.5402e-24	1.29787e-22	U2AF2	19	55654146	55674715	+	4115	protein_coding	U2 small nuclear RNA auxiliary factor 2 [Source:HGNC Symbol;Acc:HGNC:23156]	-
ENSG00000246451	116.488	130.245	84.2956	105.164	8.4837	6.61147	17.166	8.02184	109.048	10.0708	3.42687	5.83235e-24	1.36488e-22	AL049840.1	14	103682362	103684015	-	1404	antisense	novel transcript, antisense to KLC1	-
ENSG00000115170	447.109	479.269	450.379	466.087	196.185	195.7	167.083	187.94	460.711	186.727	1.30329	5.88468e-24	1.37568e-22	ACVR1	2	157736444	157875862	-	3990	protein_coding	activin A receptor type 1 [Source:HGNC Symbol;Acc:HGNC:171]	-
ENSG00000089063	817.131	722.734	611.745	713.433	1750.82	1770.55	1485.43	1641.04	716.261	1661.96	-1.2145	6.14744e-24	1.4356e-22	TMEM230	20	5068232	5113103	-	3051	protein_coding	transmembrane protein 230 [Source:HGNC Symbol;Acc:HGNC:15876]	-
ENSG00000124466	2161.03	2420.18	2420.49	2915.99	5224.9	7317.58	7725.85	6245.57	2479.42	6628.47	-1.41856	6.33891e-24	1.47877e-22	LYPD3	19	43460787	43465660	-	2519	protein_coding	LY6/PLAUR domain containing 3 [Source:HGNC Symbol;Acc:HGNC:24880]	-
ENSG00000129932	310.921	217.076	317.112	311.285	707.328	789.41	926.965	882.402	289.098	826.526	-1.51513	6.41757e-24	1.49555e-22	DOHH	19	3490822	3500940	-	2031	protein_coding	deoxyhypusine hydroxylase [Source:HGNC Symbol;Acc:HGNC:28662]	-
ENSG00000118482	898.501	1202	831.716	918.713	394.492	306.772	279.234	335.771	962.733	329.067	1.54732	6.69003e-24	1.55742e-22	PHF3	6	63635820	63779336	+	10378	protein_coding	PHD finger protein 3 [Source:HGNC Symbol;Acc:HGNC:8921]	-
ENSG00000168916	74.5182	120.881	86.704	115.26	4.24185	2.64459	4.5776	5.72988	99.3408	4.29848	4.51481	6.70369e-24	1.55897e-22	ZNF608	5	124636913	124748807	-	6922	protein_coding	zinc finger protein 608 [Source:HGNC Symbol;Acc:HGNC:29238]	-
ENSG00000150961	817.988	786.58	705.674	572.933	254.511	289.582	205.992	217.736	720.794	241.955	1.57651	6.82506e-24	1.58555e-22	SEC24D	4	118722823	118838683	-	9920	protein_coding	SEC24 homolog D, COPII coat complex component [Source:HGNC Symbol;Acc:HGNC:10706]	-
ENSG00000022567	137.902	153.23	207.126	163.215	27.572	38.3465	32.0432	33.2333	165.368	32.7988	2.34175	7.1531e-24	1.66003e-22	SLC45A4	8	141207166	141308305	-	8608	protein_coding	solute carrier family 45 member 4 [Source:HGNC Symbol;Acc:HGNC:29196]	-
ENSG00000152104	1148.61	1515.27	1210.64	1346.94	588.556	520.984	526.425	448.077	1305.37	521.01	1.32458	7.21478e-24	1.6726e-22	PTPN14	1	214348696	214552449	-	18756	protein_coding	protein tyrosine phosphatase, non-receptor type 14 [Source:HGNC Symbol;Acc:HGNC:9647]	-
ENSG00000107372	3411.56	3783.93	2613.97	3373.66	1395.57	1100.15	1403.04	1258.28	3295.78	1289.26	1.35349	7.63787e-24	1.76884e-22	ZFAND5	9	72351425	72365235	-	7053	protein_coding	zinc finger AN1-type containing 5 [Source:HGNC Symbol;Acc:HGNC:13008]	-
ENSG00000144747	375.161	440.11	332.365	340.731	130.437	89.916	120.162	122.62	372.092	115.784	1.67899	7.79016e-24	1.80224e-22	TMF1	3	69019827	69052339	-	7911	protein_coding	TATA element modulatory factor 1 [Source:HGNC Symbol;Acc:HGNC:11870]	Others
ENSG00000025156	377.73	326.039	248.873	294.459	75.2928	33.0574	64.0865	83.6563	311.775	64.0232	2.2739	7.8206e-24	1.80741e-22	HSF2	6	122399546	122433119	+	2702	protein_coding	heat shock transcription factor 2 [Source:HGNC Symbol;Acc:HGNC:5225]	HSF
ENSG00000138604	376.017	387.331	340.394	351.668	149.525	115.04	98.4185	101.992	363.853	116.244	1.64321	7.9397e-24	1.83304e-22	GLCE	15	69160584	69272217	+	6630	protein_coding	glucuronic acid epimerase [Source:HGNC Symbol;Acc:HGNC:17855]	-
ENSG00000173915	1075.8	959.389	806.829	938.904	2399.83	2640.62	1937.47	2341.23	945.231	2329.79	-1.30144	7.98894e-24	1.8425e-22	ATP5MD	10	103389041	103396492	-	924	protein_coding	ATP synthase membrane subunit DAPIT [Source:HGNC Symbol;Acc:HGNC:30889]	-
ENSG00000166689	1339.62	1368.85	1185.76	1254.4	535.533	639.99	619.121	586.74	1287.16	595.346	1.11333	8.37032e-24	1.92846e-22	PLEKHA7	11	16777317	17014443	-	10987	protein_coding	pleckstrin homology domain containing A7 [Source:HGNC Symbol;Acc:HGNC:27049]	-
ENSG00000242372	3502.36	2855.18	3118.13	3354.31	6219.61	9365.81	8647.1	8420.64	3207.5	8163.29	-1.34759	8.54683e-24	1.96709e-22	EIF6	20	35278911	35284985	-	1631	protein_coding	eukaryotic translation initiation factor 6 [Source:HGNC Symbol;Acc:HGNC:6159]	-
ENSG00000104907	463.384	361.793	507.379	421.497	963.96	1183.45	1137.53	1238.8	438.513	1130.94	-1.36613	9.09173e-24	2.09035e-22	TRMT1	19	13104902	13117567	-	3364	protein_coding	tRNA methyltransferase 1 [Source:HGNC Symbol;Acc:HGNC:25980]	-
ENSG00000105193	8751.18	7209.46	7650.02	9359.6	16726.7	24510	20623.3	22510.4	8242.57	21092.6	-1.35553	9.20194e-24	2.11351e-22	RPS16	19	39433207	39435948	-	2603	protein_coding	ribosomal protein S16 [Source:HGNC Symbol;Acc:HGNC:10396]	-
ENSG00000049618	450.536	524.387	461.619	487.12	193.004	197.022	199.126	199.4	480.915	197.138	1.28667	9.22231e-24	2.11491e-22	ARID1B	6	156776020	157210779	+	44677	protein_coding	AT-rich interaction domain 1B [Source:HGNC Symbol;Acc:HGNC:18040]	ARID
ENSG00000130338	421.413	420.531	309.887	382.797	133.618	130.907	125.884	104.284	383.657	123.673	1.63314	9.22701e-24	2.11491e-22	TULP4	6	158232236	158511828	+	12285	protein_coding	tubby like protein 4 [Source:HGNC Symbol;Acc:HGNC:15530]	Tub
ENSG00000128923	745.182	897.246	505.773	699.972	223.758	171.898	176.238	111.16	712.043	170.763	2.05851	9.89695e-24	2.26614e-22	MINDY2	15	58771192	58861900	+	9454	protein_coding	MINDY lysine 48 deubiquitinase 2 [Source:HGNC Symbol;Acc:HGNC:26954]	-
ENSG00000168071	454.818	468.202	386.957	483.754	153.767	177.187	177.382	139.809	448.433	162.036	1.47025	9.90877e-24	2.26652e-22	CCDC88B	11	64340223	64357534	+	8331	protein_coding	coiled-coil domain containing 88B [Source:HGNC Symbol;Acc:HGNC:26757]	-
ENSG00000204120	1057.82	1118.58	933.674	981.811	391.311	222.145	347.898	375.88	1022.97	334.309	1.61042	1.05483e-23	2.41032e-22	GIGYF2	2	232697299	232860575	+	13416	protein_coding	GRB10 interacting GYF protein 2 [Source:HGNC Symbol;Acc:HGNC:11960]	-
ENSG00000198034	17034.7	15509.4	14677.9	17424.4	31134.1	41845.3	34388.1	38672.1	16161.6	36509.9	-1.1757	1.09275e-23	2.49442e-22	RPS4X	X	72255679	72277300	-	2982	protein_coding	ribosomal protein S4 X-linked [Source:HGNC Symbol;Acc:HGNC:10424]	-
ENSG00000175283	285.225	259.639	355.647	289.411	795.347	670.403	856.012	932.825	297.481	813.647	-1.45172	1.20426e-23	2.74616e-22	DOLK	9	128945530	128947619	-	2090	protein_coding	dolichol kinase [Source:HGNC Symbol;Acc:HGNC:23406]	-
ENSG00000170006	1154.6	1153.48	854.195	965.826	451.757	345.119	379.941	352.961	1032.03	382.444	1.43049	1.25476e-23	2.85838e-22	TMEM154	4	152618632	152680165	-	11587	protein_coding	transmembrane protein 154 [Source:HGNC Symbol;Acc:HGNC:26489]	-
ENSG00000167900	2596.15	2371.66	2627.61	2823.44	5055.22	7736.74	6496.77	6667.29	2604.72	6489.01	-1.31668	1.34942e-23	3.07089e-22	TK1	17	78174075	78187233	-	1861	protein_coding	thymidine kinase 1 [Source:HGNC Symbol;Acc:HGNC:11830]	-
ENSG00000166441	19908.4	18954.5	16652	20947	40103.5	49447.2	38055.9	44578.5	19115.5	43046.3	-1.17114	1.38608e-23	3.1511e-22	RPL27A	11	8682411	8714759	+	7193	protein_coding	ribosomal protein L27a [Source:HGNC Symbol;Acc:HGNC:10329]	-
ENSG00000166508	6315.21	5910.42	6436.17	6373.78	10998.1	14249	13880.4	13979.8	6258.89	13276.8	-1.08486	1.42165e-23	3.22867e-22	MCM7	7	100092728	100101940	-	4386	protein_coding	minichromosome maintenance complex component 7 [Source:HGNC Symbol;Acc:HGNC:6950]	-
ENSG00000090776	5558.03	4820.78	4357.68	5395.33	2150.62	1868.4	2459.32	2211.74	5032.96	2172.52	1.21173	1.44523e-23	3.2789e-22	EFNB1	X	68828997	68842147	+	3314	protein_coding	ephrin B1 [Source:HGNC Symbol;Acc:HGNC:3226]	-
ENSG00000147403	22657.8	19796.4	20235.8	22451.3	43217	63873.4	47524.7	51946	21285.3	51640.3	-1.27862	1.47276e-23	3.33457e-22	RPL10	X	154389955	154409168	+	4825	protein_coding	ribosomal protein L10 [Source:HGNC Symbol;Acc:HGNC:10298]	-
ENSG00000102241	601.285	658.037	690.421	580.505	1523.88	1360.64	1276.01	1340.79	632.562	1375.33	-1.12057	1.52964e-23	3.45983e-22	HTATSF1	X	136497079	136512346	+	3136	protein_coding	HIV-1 Tat specific factor 1 [Source:HGNC Symbol;Acc:HGNC:5276]	-
ENSG00000211450	674.09	588.232	659.111	586.394	1900.35	2344.43	1495.73	1477.16	626.957	1804.42	-1.52462	1.57832e-23	3.56633e-22	SELENOH	11	57741250	57743554	+	2305	protein_coding	selenoprotein H [Source:HGNC Symbol;Acc:HGNC:18251]	-
ENSG00000113282	1756.75	2501.05	1856.11	2109.17	847.309	712.717	821.68	873.234	2055.77	813.735	1.33638	1.65299e-23	3.73127e-22	CLINT1	5	157785743	157859175	-	6368	protein_coding	clathrin interactor 1 [Source:HGNC Symbol;Acc:HGNC:23186]	-
ENSG00000072310	35093.8	30706.4	25703.7	36892.4	10366	14333.7	12904.3	11268.4	32099.1	12218.1	1.39358	1.71099e-23	3.85829e-22	SREBF1	17	17810399	17837002	-	8030	protein_coding	sterol regulatory element binding transcription factor 1 [Source:HGNC Symbol;Acc:HGNC:11289]	bHLH
ENSG00000131747	10093.4	10791.6	7211.69	8225.51	3892.96	3621.76	3181.44	3426.47	9080.55	3530.66	1.36279	1.82486e-23	4.1109e-22	TOP2A	17	40388516	40417950	-	6437	protein_coding	DNA topoisomerase II alpha [Source:HGNC Symbol;Acc:HGNC:11989]	-
ENSG00000155744	191.863	320.08	186.253	223.789	47.7208	25.1236	43.4872	51.569	230.496	41.9751	2.44711	2.09274e-23	4.70947e-22	FAM126B	2	200973718	201071671	-	12810	protein_coding	family with sequence similarity 126 member B [Source:HGNC Symbol;Acc:HGNC:28593]	-
ENSG00000171517	390.578	393.29	305.872	333.16	131.497	115.04	112.151	90.5322	355.725	112.305	1.66183	2.09479e-23	4.70947e-22	LPAR3	1	84811602	84893213	-	3543	protein_coding	lysophosphatidic acid receptor 3 [Source:HGNC Symbol;Acc:HGNC:14298]	-
ENSG00000261068	468.523	596.745	514.604	673.05	206.79	113.717	155.639	168.459	563.23	161.151	1.80038	2.18179e-23	4.90013e-22	AL512274.1	6	42092233	42094259	-	2027	lincRNA	novel transcript	-
ENSG00000073282	4803.43	6772.76	5178.96	5999.4	2226.97	1352.71	2099.98	1937.85	5688.64	1904.38	1.57825	2.19905e-23	4.93392e-22	TP63	3	189631416	189897279	+	7454	protein_coding	tumor protein p63 [Source:HGNC Symbol;Acc:HGNC:15979]	P53
ENSG00000162585	311.777	207.712	283.394	289.411	662.789	770.897	722.117	780.41	273.074	734.053	-1.42604	2.20877e-23	4.95076e-22	FAAP20	1	2184461	2212720	-	10916	protein_coding	FA core complex associated protein 20 [Source:HGNC Symbol;Acc:HGNC:26428]	-
ENSG00000142507	2454.82	1854.93	1979.74	2323.7	4392.43	5992.64	5299.72	5812.39	2153.3	5374.3	-1.31942	2.24491e-23	5.02671e-22	PSMB6	17	4796144	4798503	+	1448	protein_coding	proteasome subunit beta 6 [Source:HGNC Symbol;Acc:HGNC:9543]	-
ENSG00000174748	9540.05	8574.06	7735.12	8624.29	18105.3	23938.8	17658.1	20098.1	8618.38	19950.1	-1.21087	2.38409e-23	5.33301e-22	RPL15	3	23916545	23924374	+	7222	protein_coding	ribosomal protein L15 [Source:HGNC Symbol;Acc:HGNC:10306]	-
ENSG00000129562	1415.85	1141.56	1030.01	1194.66	2622.52	3428.71	2690.49	3121.64	1195.52	2965.84	-1.31066	2.81174e-23	6.27701e-22	DAD1	14	22564905	22589269	-	808	protein_coding	defender against cell death 1 [Source:HGNC Symbol;Acc:HGNC:2664]	-
ENSG00000092841	6336.62	5639.71	5251.21	6044.83	11027.7	13018	11254	12190.9	5818.09	11872.7	-1.02899	3.07072e-23	6.84832e-22	MYL6	12	56158161	56163496	+	4609	protein_coding	myosin light chain 6 [Source:HGNC Symbol;Acc:HGNC:7587]	-
ENSG00000156232	747.752	808.713	705.674	774.848	242.846	120.329	219.725	263.575	759.247	211.619	1.83882	3.11312e-23	6.93593e-22	WHAMM	15	82809628	82836108	+	5123	protein_coding	WAS protein homolog associated with actin, golgi membranes and microtubules [Source:HGNC Symbol;Acc:HGNC:30493]	-
ENSG00000173517	170.45	227.291	210.338	185.93	26.5116	59.5032	35.4764	43.5471	198.502	41.2596	2.2815	3.20959e-23	7.14374e-22	PEAK1	15	77100656	77420144	-	24184	protein_coding	pseudopodium enriched atypical kinase 1 [Source:HGNC Symbol;Acc:HGNC:29431]	-
ENSG00000141622	275.803	272.409	244.056	259.965	99.6834	80.6599	68.6641	69.9046	263.058	79.728	1.71935	3.30031e-23	7.33834e-22	RNF165	18	46326809	46463140	+	11419	protein_coding	ring finger protein 165 [Source:HGNC Symbol;Acc:HGNC:31696]	-
ENSG00000109475	2955.89	2584.48	2424.5	2764.55	6213.25	6923.53	5053.68	6373.92	2682.35	6141.09	-1.19495	3.34374e-23	7.42751e-22	RPL34	4	108620566	108630412	+	3393	protein_coding	ribosomal protein L34 [Source:HGNC Symbol;Acc:HGNC:10340]	-
ENSG00000134809	328.052	336.254	350.83	421.497	775.198	920.317	1026.53	1101.28	359.158	955.832	-1.41189	3.38793e-23	7.51818e-22	TIMM10	11	57528463	57530803	-	777	protein_coding	translocase of inner mitochondrial membrane 10 [Source:HGNC Symbol;Acc:HGNC:11814]	-
ENSG00000145912	573.876	427.341	496.942	510.676	1211.05	1424.11	1182.17	1096.7	502.209	1228.51	-1.29005	3.40776e-23	7.55467e-22	NHP2	5	178149460	178153967	-	1510	protein_coding	NHP2 ribonucleoprotein [Source:HGNC Symbol;Acc:HGNC:14377]	-
ENSG00000185608	436.831	339.66	356.45	331.477	902.453	1020.81	794.214	992.416	366.104	927.474	-1.34077	3.44149e-23	7.62185e-22	MRPL40	22	19431902	19436075	+	1965	protein_coding	mitochondrial ribosomal protein L40 [Source:HGNC Symbol;Acc:HGNC:14491]	-
ENSG00000173548	3388.44	2879.02	2487.92	3172.59	1223.77	930.895	1309.19	1195.25	2981.99	1164.78	1.35549	3.47613e-23	7.69093e-22	SNX33	15	75647906	75662301	+	8008	protein_coding	sorting nexin 33 [Source:HGNC Symbol;Acc:HGNC:28468]	-
ENSG00000132640	1015.85	1145.82	1060.52	1102.12	465.543	279.004	422.284	403.384	1081.08	392.554	1.45872	3.60405e-23	7.96605e-22	BTBD3	20	11890723	11926609	+	6228	protein_coding	BTB domain containing 3 [Source:HGNC Symbol;Acc:HGNC:15854]	-
ENSG00000228474	441.97	397.546	352.436	477.865	1008.5	1245.6	948.709	1045.13	417.454	1061.99	-1.3467	3.67631e-23	8.11774e-22	OST4	2	27070472	27071773	-	719	protein_coding	oligosaccharyltransferase complex subunit 4, non-catalytic [Source:HGNC Symbol;Acc:HGNC:32483]	-
ENSG00000158092	655.247	647.822	500.154	584.712	182.399	70.0816	143.05	160.437	596.983	138.992	2.09629	3.70604e-23	8.17528e-22	NCK1	3	136862208	136949823	+	3727	protein_coding	NCK adaptor protein 1 [Source:HGNC Symbol;Acc:HGNC:7664]	-
ENSG00000130748	512.206	370.305	479.28	466.928	1185.6	1711.05	1128.38	1266.3	457.18	1322.83	-1.532	3.8814e-23	8.55365e-22	TMEM160	19	47045907	47048630	-	663	protein_coding	transmembrane protein 160 [Source:HGNC Symbol;Acc:HGNC:26042]	-
ENSG00000166444	1994.01	1756.18	1600.01	1837.43	803.83	879.326	892.633	822.811	1796.91	849.65	1.08085	3.89033e-23	8.56486e-22	ST5	11	8693351	8910951	-	14262	protein_coding	suppression of tumorigenicity 5 [Source:HGNC Symbol;Acc:HGNC:11350]	-
ENSG00000184983	872.806	873.41	773.914	1007.89	1867.47	2126.25	1823.03	2207.15	882.005	2005.98	-1.18536	3.91802e-23	8.61732e-22	NDUFA6	22	42085525	42090955	-	1416	protein_coding	NADH:ubiquinone oxidoreductase subunit A6 [Source:HGNC Symbol;Acc:HGNC:7690]	-
ENSG00000198561	8337.48	10545.6	7283.94	8710.94	4119.9	3365.24	3551.08	3429.91	8719.5	3616.53	1.26947	3.98172e-23	8.74881e-22	CTNND1	11	57753243	57819546	+	8798	protein_coding	catenin delta 1 [Source:HGNC Symbol;Acc:HGNC:2515]	-
ENSG00000137285	23.9829	23.8358	40.1407	37.859	120.893	179.832	231.169	193.67	31.4546	181.391	-2.52409	4.19566e-23	9.20979e-22	TUBB2B	6	3224261	3231730	-	2194	protein_coding	tubulin beta 2B class IIb [Source:HGNC Symbol;Acc:HGNC:30829]	-
ENSG00000142534	14500.2	12959	11789.3	15367.4	26933.6	37328.4	32296.1	33722.7	13654	32570.2	-1.25421	4.29208e-23	9.41218e-22	RPS11	19	49496365	49499689	+	1390	protein_coding	ribosomal protein S11 [Source:HGNC Symbol;Acc:HGNC:10384]	-
ENSG00000148229	1008.14	984.927	851.787	866.551	1860.05	2020.47	1828.75	1906.91	927.851	1904.04	-1.03705	4.31196e-23	9.44403e-22	POLE3	9	113407235	113410672	-	2604	protein_coding	DNA polymerase epsilon 3, accessory subunit [Source:HGNC Symbol;Acc:HGNC:13546]	-
ENSG00000176641	891.649	1389.28	753.04	1328.43	262.995	163.964	312.422	273.888	1090.6	253.317	2.10397	4.31507e-23	9.44403e-22	RNF152	18	61808063	61894247	-	10632	protein_coding	ring finger protein 152 [Source:HGNC Symbol;Acc:HGNC:26811]	-
ENSG00000166233	1598.29	1854.93	1511.7	1466.41	744.444	528.918	620.265	686.44	1607.83	645.017	1.31624	4.32941e-23	9.46614e-22	ARIH1	15	72474326	72602985	+	22880	protein_coding	ariadne RBR E3 ubiquitin protein ligase 1 [Source:HGNC Symbol;Acc:HGNC:689]	-
ENSG00000229043	203.854	169.404	183.042	209.487	437.971	596.355	540.157	492.77	191.447	516.813	-1.43137	4.43154e-23	9.67994e-22	AC091729.3	7	1160374	1165267	+	2002	antisense	uncharacterized LOC101927021 [Source:NCBI gene;Acc:101927021]	-
ENSG00000120738	4573.02	7794.29	8496.99	8270.1	2277.87	2340.46	2524.55	2187.67	7283.6	2332.64	1.64272	4.60214e-23	1.00428e-21	EGR1	5	138465490	138469315	+	3138	protein_coding	early growth response 1 [Source:HGNC Symbol;Acc:HGNC:3238]	zf-C2H2
ENSG00000165644	322.912	236.655	374.112	307.079	890.788	1221.8	804.514	940.847	310.189	964.487	-1.63541	4.73584e-23	1.03244e-21	COMTD1	10	75233969	75236030	-	1580	protein_coding	catechol-O-methyltransferase domain containing 1 [Source:HGNC Symbol;Acc:HGNC:26309]	-
ENSG00000100941	2453.96	2642.36	1994.19	2296.78	1110.3	970.564	1041.41	1101.28	2346.83	1055.89	1.15169	4.74405e-23	1.03322e-21	PNN	14	39175183	39183218	+	4201	protein_coding	pinin, desmosome associated protein [Source:HGNC Symbol;Acc:HGNC:9162]	-
ENSG00000165480	103.64	118.328	114	107.688	344.65	269.748	306.7	335.771	110.914	314.217	-1.50398	5.04942e-23	1.09866e-21	SKA3	13	21153595	21176602	-	3048	protein_coding	spindle and kinetochore associated complex subunit 3 [Source:HGNC Symbol;Acc:HGNC:20262]	-
ENSG00000176340	3273.66	2964.15	2716.73	3411.52	6462.46	10910.2	8818.76	8113.52	3091.51	8576.24	-1.47192	5.15853e-23	1.1213e-21	COX8A	11	63974607	63976543	+	507	protein_coding	cytochrome c oxidase subunit 8A [Source:HGNC Symbol;Acc:HGNC:2294]	-
ENSG00000206418	455.675	514.171	341.999	414.767	142.102	62.1478	105.285	104.284	431.653	103.455	2.05304	5.22712e-23	1.13511e-21	RAB12	18	8609437	8639382	+	2476	protein_coding	RAB12, member RAS oncogene family [Source:HGNC Symbol;Acc:HGNC:31332]	-
ENSG00000172500	855.675	670.806	924.04	828.692	1762.49	2327.24	1914.58	2086.82	819.803	2022.78	-1.30243	5.39879e-23	1.17124e-21	FIBP	11	65883741	65888539	-	3353	protein_coding	FGF1 intracellular binding protein [Source:HGNC Symbol;Acc:HGNC:3705]	-
ENSG00000148291	413.705	277.516	402.21	340.731	906.695	905.771	1076.88	1203.28	358.541	1023.16	-1.51278	5.51513e-23	1.19532e-21	SURF2	9	133356552	133361169	+	1008	protein_coding	surfeit 2 [Source:HGNC Symbol;Acc:HGNC:11475]	-
ENSG00000072803	656.96	675.063	592.477	560.314	185.581	105.784	216.292	205.13	621.203	178.197	1.7972	5.93019e-23	1.28403e-21	FBXW11	5	171861549	172006873	-	5577	protein_coding	F-box and WD repeat domain containing 11 [Source:HGNC Symbol;Acc:HGNC:13607]	-
ENSG00000234287	97.6446	91.0866	94.7322	137.975	371.162	338.507	326.154	503.084	105.36	384.727	-1.86916	6.1311e-23	1.32624e-21	AC099560.2	3	40761545	40761799	+	255	processed_pseudogene	ribosomal protein S27 (RPS27) pseudogene	-
ENSG00000111057	5871.52	4098.05	4978.26	4777.81	10222.9	14030.9	12232.5	12799.4	4931.41	12321.4	-1.32103	6.22869e-23	1.34605e-21	KRT18	12	52948871	52952901	+	3218	protein_coding	keratin 18 [Source:HGNC Symbol;Acc:HGNC:6430]	-
ENSG00000187566	5.13919	5.95894	14.4507	8.41312	98.623	62.1478	112.151	106.576	8.49048	94.8745	-3.47579	6.43869e-23	1.39008e-21	NHLRC1	6	18120440	18122687	-	2248	protein_coding	NHL repeat containing E3 ubiquitin protein ligase 1 [Source:HGNC Symbol;Acc:HGNC:21576]	-
ENSG00000133789	1937.47	2177.57	1540.6	2037.66	832.463	595.032	719.828	779.264	1923.33	731.647	1.39318	6.58269e-23	1.4198e-21	SWAP70	11	9664077	9752991	+	7190	protein_coding	switching B cell complex subunit SWAP70 [Source:HGNC Symbol;Acc:HGNC:17070]	-
ENSG00000260805	3.42613	1.70255	5.6197	1.68262	71.051	100.494	65.2309	64.1747	3.10775	75.2377	-4.5818	6.81263e-23	1.46797e-21	AC092803.2	1	212557833	212559731	-	1899	lincRNA	novel transcript	-
ENSG00000197724	619.272	692.939	598.9	602.379	241.785	238.013	287.245	281.91	628.373	262.238	1.25991	6.88499e-23	1.48213e-21	PHF2	9	93576407	93679587	+	5569	protein_coding	PHD finger protein 2 [Source:HGNC Symbol;Acc:HGNC:8920]	-
ENSG00000143702	512.206	624.837	483.295	455.991	207.851	193.055	167.083	158.145	519.082	181.533	1.51544	7.27106e-23	1.56373e-21	CEP170	1	243124428	243255348	-	10939	protein_coding	centrosomal protein 170 [Source:HGNC Symbol;Acc:HGNC:28920]	-
ENSG00000249669	11.1349	6.81022	5.6197	1.68262	64.6882	119.006	108.718	75.6345	6.31186	92.0118	-3.86682	7.45075e-23	1.60083e-21	CARMN	5	149406689	149432835	+	17988	lincRNA	cardiac mesoderm enhancer-associated non-coding RNA [Source:HGNC Symbol;Acc:HGNC:42872]	-
ENSG00000124562	1109.21	876.815	936.885	865.71	2014.88	2546.74	2042.76	2507.4	947.155	2277.94	-1.2658	7.60438e-23	1.63227e-21	SNRPC	6	34757406	34773794	+	1277	protein_coding	small nuclear ribonucleoprotein polypeptide C [Source:HGNC Symbol;Acc:HGNC:11157]	-
ENSG00000256518	2.56959	2.55383	4.81689	1.68262	57.265	83.3045	64.0865	103.138	2.90573	76.9485	-4.71488	7.6215e-23	1.63437e-21	AP000812.3	11	72158822	72159734	+	609	unprocessed_pseudogene	folate receptor 1 (adult) (FOLR1) pseudogene	-
ENSG00000075240	964.454	992.589	1067.74	1055.01	489.934	517.017	469.204	421.72	1019.95	474.469	1.10494	8.44339e-23	1.80888e-21	GRAMD4	22	46576012	46679790	+	4885	protein_coding	GRAM domain containing 4 [Source:HGNC Symbol;Acc:HGNC:29113]	-
ENSG00000108518	14030.8	11969.8	11517.2	13487.9	24112.8	34518.5	31112.8	30402.8	12751.4	30036.7	-1.23604	8.54784e-23	1.8295e-21	PFN1	17	4945652	4949061	-	1987	protein_coding	profilin 1 [Source:HGNC Symbol;Acc:HGNC:8881]	-
ENSG00000281162	10.2784	16.1743	12.0422	11.7784	108.167	64.7924	127.029	114.598	12.5683	103.646	-3.04792	8.80895e-23	1.88358e-21	LINC01127	2	101962056	101987167	+	3841	lincRNA	long intergenic non-protein coding RNA 1127 [Source:HGNC Symbol;Acc:HGNC:49292]	-
ENSG00000048052	533.619	671.658	550.731	593.125	225.878	128.263	211.714	177.626	587.283	185.87	1.65499	8.84741e-23	1.88999e-21	HDAC9	7	18086949	19002416	+	16827	protein_coding	histone deacetylase 9 [Source:HGNC Symbol;Acc:HGNC:14065]	-
ENSG00000144713	6796.58	6179.42	5592.41	6715.35	12992.8	18431.5	13536	16151.4	6320.94	15277.9	-1.27318	8.9067e-23	1.90083e-21	RPL32	3	12834485	12841588	-	3720	protein_coding	ribosomal protein L32 [Source:HGNC Symbol;Acc:HGNC:10336]	-
ENSG00000272512	10.2784	8.51277	21.676	10.0957	113.469	146.775	144.195	74.4885	12.6407	119.732	-3.23464	9.02136e-23	1.92346e-21	AL645608.7	1	995966	998051	-	2086	lincRNA	novel transcript	-
ENSG00000099795	1129.76	760.19	965.786	1032.29	2180.31	3058.47	2444.44	2822.54	972.008	2626.44	-1.43378	9.79272e-23	2.08593e-21	NDUFB7	19	14566078	14572062	-	531	protein_coding	NADH:ubiquinone oxidoreductase subunit B7 [Source:HGNC Symbol;Acc:HGNC:7702]	-
ENSG00000154429	308.351	329.444	207.929	254.076	82.716	43.6357	60.6533	65.3207	274.95	63.0814	2.11476	9.80513e-23	2.08658e-21	CCSAP	1	229321005	229343294	-	6263	protein_coding	centriole, cilia and spindle associated protein [Source:HGNC Symbol;Acc:HGNC:29578]	-
ENSG00000106268	853.105	782.324	843.758	1122.31	1941.71	2426.41	2251.04	2350.4	900.374	2242.39	-1.3162	1.02898e-22	2.18763e-21	NUDT1	7	2242222	2251146	+	2093	protein_coding	nudix hydrolase 1 [Source:HGNC Symbol;Acc:HGNC:8048]	-
ENSG00000004142	2126.77	1606.36	2009.45	1712.91	3787.97	4189.03	4252.59	4123.22	1863.87	4088.2	-1.13306	1.04039e-22	2.20978e-21	POLDIP2	17	28347177	28357522	-	2121	protein_coding	DNA polymerase delta interacting protein 2 [Source:HGNC Symbol;Acc:HGNC:23781]	-
ENSG00000102081	1564.88	1883.88	1166.49	1553.06	598.101	353.053	428.006	506.522	1542.08	471.42	1.708	1.0802e-22	2.29216e-21	FMR1	X	147911951	147951125	+	8919	protein_coding	fragile X mental retardation 1 [Source:HGNC Symbol;Acc:HGNC:3775]	-
ENSG00000164663	189.293	223.035	154.943	148.071	41.358	43.6357	28.61	36.6713	178.836	37.5688	2.25331	1.11695e-22	2.3679e-21	USP49	6	41789896	41895361	-	10921	protein_coding	ubiquitin specific peptidase 49 [Source:HGNC Symbol;Acc:HGNC:20078]	-
ENSG00000163659	6954.18	6082.37	2469.46	4761.83	551.44	477.348	647.731	563.821	5066.96	560.085	3.17722	1.12627e-22	2.38538e-21	TIPARP	3	156673235	156706770	+	5048	protein_coding	TCDD inducible poly(ADP-ribose) polymerase [Source:HGNC Symbol;Acc:HGNC:23696]	-
ENSG00000183011	668.951	538.007	590.872	713.433	1299.07	1668.74	1477.42	1643.33	627.816	1522.14	-1.27731	1.16348e-22	2.46186e-21	NAA38	17	7856685	7885238	-	1943	protein_coding	N(alpha)-acetyltransferase 38, NatC auxiliary subunit [Source:HGNC Symbol;Acc:HGNC:28212]	-
ENSG00000204410	101.927	124.286	146.112	99.2748	22.2697	13.2229	16.0216	12.6057	117.9	16.03	2.86693	1.16566e-22	2.46414e-21	MSH5	6	31739948	31762834	+	6234	protein_coding	mutS homolog 5 [Source:HGNC Symbol;Acc:HGNC:7328]	-
ENSG00000136002	2987.58	3212.72	3330.08	3090.98	1469.8	1741.46	1638.78	1459.97	3155.34	1577.5	1.00072	1.1935e-22	2.5206e-21	ARHGEF4	2	130836916	131047263	+	10611	protein_coding	Rho guanine nucleotide exchange factor 4 [Source:HGNC Symbol;Acc:HGNC:684]	-
ENSG00000126067	1970.02	1674.46	1605.63	1684.31	3460.29	4446.88	3584.26	3864.23	1733.61	3838.92	-1.14673	1.2105e-22	2.55408e-21	PSMB2	1	35599544	35641844	-	4843	protein_coding	proteasome subunit beta 2 [Source:HGNC Symbol;Acc:HGNC:9539]	-
ENSG00000197815	65.9529	134.502	87.5068	111.895	6.36277	1.32229	5.72201	5.72988	99.964	4.78424	4.34965	1.22508e-22	2.58239e-21	AC122129.1	17	17858227	17860041	+	1815	antisense	novel transcript, antisense to TOM1L2	-
ENSG00000142676	12917.4	11833.6	10526.5	13609.9	26399.1	32552.2	24354	30126.6	12221.8	28358	-1.21428	1.24708e-22	2.62629e-21	RPL11	1	23691742	23696835	+	2659	protein_coding	ribosomal protein L11 [Source:HGNC Symbol;Acc:HGNC:10301]	-
ENSG00000115977	756.317	874.261	721.731	823.644	379.645	334.54	311.277	291.078	793.988	329.135	1.26966	1.25846e-22	2.64774e-21	AAK1	2	69457997	69674349	-	23608	protein_coding	AP2 associated kinase 1 [Source:HGNC Symbol;Acc:HGNC:19679]	-
ENSG00000063177	14736.6	11644.6	12479.8	13540.9	26579.4	40065.5	31204.4	31894.8	13100.5	32436	-1.30795	1.30495e-22	2.74298e-21	RPL18	19	48615328	48619536	-	4209	protein_coding	ribosomal protein L18 [Source:HGNC Symbol;Acc:HGNC:10310]	-
ENSG00000240849	2417.13	2160.54	1803.12	2237.89	963.96	650.569	876.611	842.293	2154.67	833.358	1.36922	1.30904e-22	2.74897e-21	TMEM189	20	50118254	50153734	-	7931	protein_coding	transmembrane protein 189 [Source:HGNC Symbol;Acc:HGNC:16735]	-
ENSG00000100462	1003.85	962.794	1173.72	932.174	1957.61	2356.33	2309.4	2306.85	1018.13	2232.55	-1.13233	1.34078e-22	2.81298e-21	PRMT5	14	22920511	22929585	-	3467	protein_coding	protein arginine methyltransferase 5 [Source:HGNC Symbol;Acc:HGNC:10894]	-
ENSG00000184990	899.358	752.529	879.885	879.171	1670.23	2415.83	2040.47	2371.03	852.736	2124.39	-1.31642	1.38553e-22	2.90414e-21	SIVA1	14	104753100	104768494	+	4776	protein_coding	SIVA1 apoptosis inducing factor [Source:HGNC Symbol;Acc:HGNC:17712]	-
ENSG00000114120	1251.39	1471.01	885.505	1117.26	408.278	231.401	367.353	356.399	1181.29	340.858	1.79069	1.41779e-22	2.96896e-21	SLC25A36	3	140941830	140980961	+	10305	protein_coding	solute carrier family 25 member 36 [Source:HGNC Symbol;Acc:HGNC:25554]	-
ENSG00000231856	5.99572	3.40511	5.6197	3.36525	55.144	83.3045	66.3753	100.846	4.59645	76.4175	-4.05085	1.46831e-22	3.07187e-21	AL162377.1	13	51803838	51813832	+	2469	antisense	novel transcript	-
ENSG00000281183	188.437	251.978	89.1125	141.34	18.0279	9.25606	19.4548	20.6276	167.717	16.8416	3.30304	1.48822e-22	3.11062e-21	NPTN-IT1	15	73567012	73569294	-	2283	sense_intronic	NPTN intronic transcript 1 [Source:HGNC Symbol;Acc:HGNC:45091]	-
ENSG00000244879	637.259	734.652	746.618	742.037	300.111	163.964	249.479	195.962	715.142	227.379	1.64909	1.50059e-22	3.13353e-21	GABPB1-AS1	15	50354959	50372202	+	17179	antisense	GABPB1 antisense RNA 1 [Source:HGNC Symbol;Acc:HGNC:44157]	-
ENSG00000100852	758.03	1093.04	573.21	760.546	227.999	140.163	242.613	202.838	796.206	203.403	1.96585	1.53452e-22	3.2014e-21	ARHGAP5	14	32076114	32159728	+	10888	protein_coding	Rho GTPase activating protein 5 [Source:HGNC Symbol;Acc:HGNC:675]	-
ENSG00000092964	776.874	730.396	626.998	827.01	318.139	273.715	222.014	291.078	740.319	276.236	1.42121	1.54197e-22	3.21392e-21	DPYSL2	8	26514022	26658178	+	7305	protein_coding	dihydropyrimidinase like 2 [Source:HGNC Symbol;Acc:HGNC:3014]	-
ENSG00000120875	676.66	587.381	532.266	651.176	1293.76	1699.15	2113.71	1657.08	611.871	1690.93	-1.46648	1.56712e-22	3.26329e-21	DUSP4	8	29333064	29350668	-	7257	protein_coding	dual specificity phosphatase 4 [Source:HGNC Symbol;Acc:HGNC:3070]	-
ENSG00000142655	702.356	568.653	637.435	732.783	217.395	265.781	286.1	261.283	660.307	257.64	1.35906	1.58336e-22	3.29403e-21	PEX14	1	10472288	10630758	+	2995	protein_coding	peroxisomal biogenesis factor 14 [Source:HGNC Symbol;Acc:HGNC:8856]	-
ENSG00000102007	4038.55	3417.03	3334.89	3656.34	6776.35	8851.44	7607.98	8403.45	3611.7	7909.8	-1.13088	1.62486e-22	3.37722e-21	PLP2	X	49171926	49175239	+	1279	protein_coding	proteolipid protein 2 [Source:HGNC Symbol;Acc:HGNC:9087]	-
ENSG00000116350	2083.08	2156.28	1839.25	2162.17	996.834	731.229	916.665	953.453	2060.2	899.545	1.19432	1.627e-22	3.37853e-21	SRSF4	1	29147743	29181987	-	8893	protein_coding	serine and arginine rich splicing factor 4 [Source:HGNC Symbol;Acc:HGNC:10786]	-
ENSG00000197728	6432.55	5553.73	5286.54	5774.77	11155	14754.2	11835.4	12865.9	5761.9	12652.6	-1.13475	1.66405e-22	3.45225e-21	RPS26	12	56041351	56044697	+	2053	protein_coding	ribosomal protein S26 [Source:HGNC Symbol;Acc:HGNC:10414]	-
ENSG00000242247	704.925	733.801	661.519	738.672	340.408	326.607	292.967	268.159	709.729	307.035	1.20887	1.67623e-22	3.47428e-21	ARFGAP3	22	42796502	42858106	-	3381	protein_coding	ADP ribosylation factor GTPase activating protein 3 [Source:HGNC Symbol;Acc:HGNC:661]	-
ENSG00000109787	1068.09	1498.25	1149.63	1320.86	452.817	342.474	520.703	476.726	1259.21	448.18	1.48887	1.6996e-22	3.51945e-21	KLF3	4	38664196	38701042	+	6297	protein_coding	Kruppel like factor 3 [Source:HGNC Symbol;Acc:HGNC:16516]	zf-C2H2
ENSG00000213523	466.81	331.147	390.971	382.797	862.156	952.052	975.03	1058.88	392.931	962.03	-1.29172	1.71807e-22	3.5544e-21	SRA1	5	140537340	140558252	-	3396	protein_coding	steroid receptor RNA activator 1 [Source:HGNC Symbol;Acc:HGNC:11281]	-
ENSG00000196998	803.426	602.704	692.829	645.286	1400.87	1912.04	1777.26	1673.13	686.062	1690.82	-1.30087	1.75964e-22	3.63703e-21	WDR45	X	49071470	49101170	-	5452	protein_coding	WD repeat domain 45 [Source:HGNC Symbol;Acc:HGNC:28912]	-
ENSG00000153250	635.546	762.744	577.224	649.493	212.092	84.6268	151.061	191.378	656.252	159.79	2.03248	1.76402e-22	3.64271e-21	RBMS1	2	160272151	160493794	-	11765	protein_coding	RNA binding motif single stranded interacting protein 1 [Source:HGNC Symbol;Acc:HGNC:9907]	-
ENSG00000065526	2050.54	2875.61	2120.23	2422.14	627.794	378.176	861.734	674.98	2367.13	635.671	1.89569	1.77402e-22	3.65996e-21	SPEN	1	15847864	15940460	+	13294	protein_coding	spen family transcriptional repressor [Source:HGNC Symbol;Acc:HGNC:17575]	-
ENSG00000167815	2722.06	2129.04	2263.14	2418.77	4879.19	7775.09	6233.55	6023.25	2383.25	6227.77	-1.38562	1.90245e-22	3.92131e-21	PRDX2	19	12796820	12801859	-	2093	protein_coding	peroxiredoxin 2 [Source:HGNC Symbol;Acc:HGNC:9353]	-
ENSG00000213326	173.019	139.609	145.309	147.23	444.334	573.876	400.54	387.34	151.292	451.522	-1.57608	1.91217e-22	3.93768e-21	RPS7P11	17	46721582	46722167	-	586	processed_pseudogene	ribosomal protein S7 pseudogene 11 [Source:HGNC Symbol;Acc:HGNC:35841]	-
ENSG00000137288	356.317	341.362	348.422	407.195	772.016	802.633	750.727	806.768	363.324	783.036	-1.10766	2.02296e-22	4.162e-21	UQCC2	6	33694293	33711727	-	4689	protein_coding	ubiquinol-cytochrome c reductase complex assembly factor 2 [Source:HGNC Symbol;Acc:HGNC:21237]	-
ENSG00000140691	65.9529	68.1022	106.774	96.7509	249.209	363.631	351.331	308.268	84.3951	318.11	-1.91119	2.09008e-22	4.29612e-21	ARMC5	16	31458080	31467166	+	5545	protein_coding	armadillo repeat containing 5 [Source:HGNC Symbol;Acc:HGNC:25781]	-
ENSG00000145283	248.394	271.557	160.563	266.696	59.3859	58.1809	52.6425	55.0069	236.803	56.304	2.07184	2.15498e-22	4.42545e-21	SLC10A6	4	86823468	86849263	-	1502	protein_coding	solute carrier family 10 member 6 [Source:HGNC Symbol;Acc:HGNC:30603]	-
ENSG00000187079	904.497	1030.9	722.533	831.216	377.525	277.682	266.645	320.874	872.286	310.681	1.4874	2.22121e-22	4.55307e-21	TEAD1	11	12674591	12944483	+	10279	protein_coding	TEA domain transcription factor 1 [Source:HGNC Symbol;Acc:HGNC:11714]	TEA
ENSG00000108557	1625.7	1694.89	1760.57	1787.79	657.487	429.746	738.139	679.564	1717.24	626.234	1.45379	2.22665e-22	4.56004e-21	RAI1	17	17681473	17811453	+	9693	protein_coding	retinoic acid induced 1 [Source:HGNC Symbol;Acc:HGNC:9834]	-
ENSG00000274210	3.42613	2.55383	0.802815	5.88918	68.93	59.5032	74.3861	77.9264	3.16799	70.1864	-4.48129	2.24575e-22	4.59082e-21	RF00003	1	148522601	148522765	+	165	snRNA		-
ENSG00000112742	673.234	761.042	595.689	628.46	253.45	183.799	176.238	273.888	664.606	221.844	1.58035	2.2458e-22	4.59082e-21	TTK	6	80003887	80042527	+	4579	protein_coding	TTK protein kinase [Source:HGNC Symbol;Acc:HGNC:12401]	-
ENSG00000185245	139.615	162.594	135.676	183.406	36.0557	30.4128	35.4764	18.3356	155.323	30.0701	2.36597	2.2832e-22	4.66299e-21	GP1BA	17	4932297	4935030	+	2501	protein_coding	glycoprotein Ib platelet subunit alpha [Source:HGNC Symbol;Acc:HGNC:4439]	-
ENSG00000173812	14258.7	14178.9	11948.3	14422.6	28429.9	39009	28433.8	31789.4	13702.1	31915.5	-1.21983	2.35059e-22	4.79623e-21	EIF1	17	41688885	41692668	+	3623	protein_coding	eukaryotic translation initiation factor 1 [Source:HGNC Symbol;Acc:HGNC:3249]	-
ENSG00000158062	274.947	215.373	348.422	239.774	680.817	884.615	785.059	780.41	269.629	782.725	-1.53615	2.41465e-22	4.92242e-21	UBXN11	1	26281328	26318363	-	4704	protein_coding	UBX domain protein 11 [Source:HGNC Symbol;Acc:HGNC:30600]	-
ENSG00000110987	607.281	589.084	468.844	571.251	148.465	52.8918	135.039	150.123	559.115	121.63	2.19402	2.41685e-22	4.92242e-21	BCL7A	12	122019422	122062044	+	6565	protein_coding	BCL tumor suppressor 7A [Source:HGNC Symbol;Acc:HGNC:1004]	-
ENSG00000181019	1450.11	1703.41	1791.08	1614.48	3480.44	4477.29	3289.01	3872.26	1639.77	3779.75	-1.20447	2.45101e-22	4.98746e-21	NQO1	16	69706996	69726951	-	3254	protein_coding	NAD(P)H quinone dehydrogenase 1 [Source:HGNC Symbol;Acc:HGNC:2874]	-
ENSG00000226950	271.52	177.066	160.563	205.28	554.622	654.536	608.821	619.974	203.607	609.488	-1.5821	2.49682e-22	5.07604e-21	DANCR	4	52712404	52720351	+	2285	processed_transcript	differentiation antagonizing non-protein coding RNA [Source:HGNC Symbol;Acc:HGNC:28964]	-
ENSG00000167779	5641.97	6018.53	6066.87	7646.69	13854.9	18833.4	14495	14862.2	6343.51	15511.4	-1.28991	2.51944e-22	5.11735e-21	IGFBP6	12	53097436	53102345	+	1346	protein_coding	insulin like growth factor binding protein 6 [Source:HGNC Symbol;Acc:HGNC:5475]	-
ENSG00000281649	518.202	553.33	434.323	465.246	201.488	104.461	136.184	127.203	492.775	142.334	1.78569	2.61237e-22	5.30128e-21	EBLN3P	9	37079857	37090507	+	6483	lincRNA	endogenous Bornavirus-like nucleoprotein 3, pseudogene [Source:HGNC Symbol;Acc:HGNC:50682]	-
ENSG00000117335	4061.67	5238.76	3683.31	4506.07	1955.49	2032.37	1820.74	1830.13	4372.45	1909.68	1.19519	2.6677e-22	5.40863e-21	CD46	1	207752057	207795513	+	8708	protein_coding	CD46 molecule [Source:HGNC Symbol;Acc:HGNC:6953]	-
ENSG00000179826	3.42613	4.25638	4.01407	2.52394	51.9626	76.6931	75.5305	73.3425	3.55513	69.3822	-4.28263	2.76107e-22	5.59286e-21	MRGPRX3	11	18120955	18138480	+	1741	protein_coding	MAS related GPR family member X3 [Source:HGNC Symbol;Acc:HGNC:17980]	-
ENSG00000115128	1145.18	1015.57	961.772	1030.61	2127.29	2229.39	1904.28	2197.98	1038.28	2114.74	-1.02626	2.85284e-22	5.77351e-21	SF3B6	2	24067584	24076443	-	1197	protein_coding	splicing factor 3b subunit 6 [Source:HGNC Symbol;Acc:HGNC:30096]	-
ENSG00000278311	1745.61	1836.2	1426.6	1722.17	677.635	458.836	646.587	721.965	1682.65	626.256	1.42438	2.91642e-22	5.89683e-21	GGNBP2	17	36544888	36589848	+	9729	protein_coding	gametogenetin binding protein 2 [Source:HGNC Symbol;Acc:HGNC:19357]	-
ENSG00000071462	1263.38	1035.15	1099.05	1049.12	2247.12	2618.14	2321.99	2199.13	1111.68	2346.6	-1.07757	3.07866e-22	6.21923e-21	BUD23	7	73683025	73705161	+	7944	protein_coding	BUD23, rRNA methyltransferase and ribosome maturation factor [Source:HGNC Symbol;Acc:HGNC:16405]	-
ENSG00000221983	8191.01	6975.36	7114.55	8190.17	14670.4	22211.9	17749.7	19626	7617.77	18564.5	-1.28505	3.18626e-22	6.43076e-21	UBA52	19	18571730	18577550	+	4306	protein_coding	ubiquitin A-52 residue ribosomal protein fusion product 1 [Source:HGNC Symbol;Acc:HGNC:12458]	-
ENSG00000227959	10.2784	9.36405	16.8591	21.0328	79.5347	156.031	133.895	105.43	14.3836	118.723	-3.03844	3.20447e-22	6.46167e-21	AL451042.2	1	16155211	16157329	+	904	antisense	novel transcript	-
ENSG00000106665	4977.3	5428.59	5722.46	5789.07	2460.27	2878.63	2912.5	2447.81	5479.36	2674.8	1.03484	3.24536e-22	6.53821e-21	CLIP2	7	74289475	74405943	+	7315	protein_coding	CAP-Gly domain containing linker protein 2 [Source:HGNC Symbol;Acc:HGNC:2586]	-
ENSG00000198160	446.253	572.058	387.76	457.674	172.855	116.362	136.184	162.729	465.936	147.032	1.65976	3.28083e-22	6.60371e-21	MIER1	1	66924895	66988619	+	8273	protein_coding	MIER1 transcriptional regulator [Source:HGNC Symbol;Acc:HGNC:29657]	Others
ENSG00000138764	788.865	749.975	409.436	612.475	187.702	195.7	149.917	151.269	640.188	171.147	1.90382	3.31062e-22	6.65766e-21	CCNG2	4	77157151	77433388	+	7471	protein_coding	cyclin G2 [Source:HGNC Symbol;Acc:HGNC:1593]	-
ENSG00000184557	1323.34	1682.97	1692.33	1850.89	566.287	542.141	764.46	621.119	1637.38	623.502	1.39254	3.31582e-22	6.66212e-21	SOCS3	17	78356778	78360077	-	2734	protein_coding	suppressor of cytokine signaling 3 [Source:HGNC Symbol;Acc:HGNC:19391]	-
ENSG00000119866	220.129	295.393	280.985	299.507	80.5951	71.4039	73.2417	98.554	274.003	80.9487	1.75697	3.31884e-22	6.66218e-21	BCL11A	2	60450520	60555154	-	25422	protein_coding	B cell CLL/lymphoma 11A [Source:HGNC Symbol;Acc:HGNC:13221]	zf-C2H2
ENSG00000233762	213.276	177.066	158.155	249.87	551.44	577.843	549.313	717.382	199.592	598.994	-1.58601	3.32802e-22	6.67459e-21	AC007969.1	2	171517270	171517716	-	447	processed_pseudogene	ribosomal protein S15 (RPS15) pseudogene	-
ENSG00000145425	7627.41	7202.65	6514.84	6805.37	16524.1	19827.8	13639	15197.9	7037.57	16297.2	-1.21144	3.3384e-22	6.68939e-21	RPS3A	4	151099573	151104652	+	2341	protein_coding	ribosomal protein S3A [Source:HGNC Symbol;Acc:HGNC:10421]	-
ENSG00000214135	339.186	366.049	316.309	289.411	104.986	107.106	125.884	122.62	327.739	115.149	1.5084	3.89601e-22	7.79972e-21	AC132008.2	3	197578213	197627906	-	3502	transcribed_unprocessed_pseudogene	succinate dehydrogenase complex flavoprotein subunit A pseudogene [Source:NCBI gene;Acc:220729]	-
ENSG00000162775	724.626	702.304	532.266	658.747	232.241	197.022	286.1	216.59	654.486	232.988	1.48818	4.10553e-22	8.2118e-21	RBM15	1	110338506	110346681	+	4670	protein_coding	RNA binding motif protein 15 [Source:HGNC Symbol;Acc:HGNC:14959]	-
ENSG00000198369	481.371	469.905	394.985	454.309	154.827	78.0154	123.595	156.999	450.142	128.359	1.80361	4.45476e-22	8.89436e-21	SPRED2	2	65310851	65432637	-	5154	protein_coding	sprouty related EVH1 domain containing 2 [Source:HGNC Symbol;Acc:HGNC:17722]	-
ENSG00000278456	116.488	128.543	71.4505	117.784	14.8465	7.93376	10.2996	2.29195	108.566	8.84295	3.60082	4.46756e-22	8.91193e-21	AC015712.7	15	100888472	100889106	-	635	antisense	novel transcript, antisense to ALDH1A3	-
ENSG00000143198	1355.89	1233.5	1182.55	1325.07	2470.88	3235.65	2624.11	2673.56	1274.25	2751.05	-1.11	4.50904e-22	8.98665e-21	MGST3	1	165630861	165661796	+	8401	protein_coding	microsomal glutathione S-transferase 3 [Source:HGNC Symbol;Acc:HGNC:7064]	-
ENSG00000103888	3232.55	3627.29	3266.65	3177.64	1675.53	1777.16	1620.47	1406.11	3326.03	1619.82	1.03823	4.52503e-22	9.01047e-21	CEMIP	15	80779343	80951776	+	7621	protein_coding	cell migration inducing hyaluronidase 1 [Source:HGNC Symbol;Acc:HGNC:29213]	-
ENSG00000103852	512.206	486.93	518.618	565.362	229.06	224.79	223.158	233.779	520.779	227.697	1.19334	4.59585e-22	9.14333e-21	TTC23	15	99136323	99251223	-	6148	protein_coding	tetratricopeptide repeat domain 23 [Source:HGNC Symbol;Acc:HGNC:25730]	-
ENSG00000140264	4540.47	3972.91	3633.54	4098.03	9052.1	13618.3	9259.35	9763.72	4061.24	10423.4	-1.35974	4.64172e-22	9.21881e-21	SERF2	15	43777087	43802589	+	7347	protein_coding	small EDRK-rich factor 2 [Source:HGNC Symbol;Acc:HGNC:10757]	-
ENSG00000084623	2747.75	2226.94	2417.28	2492.81	4593.92	6217.43	5651.05	5457.14	2471.19	5479.89	-1.14877	4.64206e-22	9.21881e-21	EIF3I	1	32221928	32231604	+	1725	protein_coding	eukaryotic translation initiation factor 3 subunit I [Source:HGNC Symbol;Acc:HGNC:3272]	-
ENSG00000175505	78.8009	85.1277	69.0421	88.3378	213.153	338.507	297.544	260.137	80.3271	277.335	-1.78584	4.69679e-22	9.3192e-21	CLCF1	11	67364168	67374177	-	1975	protein_coding	cardiotrophin like cytokine factor 1 [Source:HGNC Symbol;Acc:HGNC:17412]	-
ENSG00000105556	596.146	601.002	708.083	698.289	209.972	137.519	252.913	236.071	650.88	209.119	1.63473	4.78661e-22	9.48898e-21	MIER2	19	301444	344815	-	7939	protein_coding	MIER family member 2 [Source:HGNC Symbol;Acc:HGNC:29210]	-
ENSG00000065923	516.488	553.33	523.435	503.105	252.39	207.6	188.826	190.232	524.09	209.762	1.31936	4.93177e-22	9.76806e-21	SLC9A7	X	46599252	46759172	-	10033	protein_coding	solute carrier family 9 member A7 [Source:HGNC Symbol;Acc:HGNC:17123]	-
ENSG00000197279	281.799	223.035	171	226.313	67.8696	43.6357	50.3537	49.277	225.536	52.784	2.08776	4.95395e-22	9.80328e-21	ZNF165	6	28080975	28089563	+	2107	protein_coding	zinc finger protein 165 [Source:HGNC Symbol;Acc:HGNC:12953]	zf-C2H2
ENSG00000229980	7.70878	5.95894	14.4507	6.7305	89.0788	80.6599	74.3861	81.3644	8.71222	81.3723	-3.2155	5.25461e-22	1.0389e-20	TOB1-AS1	17	50866679	50909737	+	2149	processed_transcript	TOB1 antisense RNA 1 [Source:HGNC Symbol;Acc:HGNC:44340]	-
ENSG00000137145	365.739	481.823	328.351	362.605	134.679	137.519	111.007	107.722	384.63	122.732	1.6488	5.2742e-22	1.04185e-20	DENND4C	9	19230435	19373545	+	8745	protein_coding	DENN domain containing 4C [Source:HGNC Symbol;Acc:HGNC:26079]	-
ENSG00000166145	10334.9	8975.86	8135.73	10481.9	4354.26	4383.41	4848.83	4551.82	9482.1	4534.58	1.0642	5.43519e-22	1.0727e-20	SPINT1	15	40844018	40858207	+	3542	protein_coding	serine peptidase inhibitor, Kunitz type 1 [Source:HGNC Symbol;Acc:HGNC:11246]	-
ENSG00000127564	1337.05	1040.26	1275.67	1303.19	2366.95	2989.71	3050.97	2977.25	1239.04	2846.22	-1.19959	5.76862e-22	1.13751e-20	PKMYT1	16	2968024	2980539	-	5034	protein_coding	protein kinase, membrane associated tyrosine/threonine 1 [Source:HGNC Symbol;Acc:HGNC:29650]	-
ENSG00000253295	0	0	0	0	124.074	216.856	224.303	124.911	0	172.536	-10.1267	5.92504e-22	1.16732e-20	AC022217.2	5	172758226	172762556	+	472	antisense	novel transcript	-
ENSG00000164040	856.531	884.477	624.59	852.249	283.143	124.296	232.313	207.422	804.462	211.794	1.921	6.01721e-22	1.18443e-20	PGRMC2	4	128269237	128288829	-	4626	protein_coding	progesterone receptor membrane component 2 [Source:HGNC Symbol;Acc:HGNC:16089]	-
ENSG00000168002	1276.23	1088.78	1071.76	1106.33	2086.99	2637.98	2545.15	2688.46	1135.77	2489.64	-1.13208	6.04415e-22	1.18868e-20	POLR2G	11	62761544	62766710	+	1923	protein_coding	RNA polymerase II subunit G [Source:HGNC Symbol;Acc:HGNC:9194]	-
ENSG00000070808	197.859	307.311	294.633	329.794	69.9905	88.5937	69.8085	71.0506	282.399	74.8608	1.91968	6.08076e-22	1.19483e-20	CAMK2A	5	150219491	150290291	-	6150	protein_coding	calcium/calmodulin dependent protein kinase II alpha [Source:HGNC Symbol;Acc:HGNC:1460]	-
ENSG00000130559	1568.31	1671.06	1383.25	1445.37	735.961	741.807	778.193	701.338	1517	739.325	1.03687	6.08842e-22	1.19528e-20	CAMSAP1	9	135808487	135907228	-	8642	protein_coding	calmodulin regulated spectrin associated protein 1 [Source:HGNC Symbol;Acc:HGNC:19946]	-
ENSG00000161016	32167.9	27699.7	29289.9	34181.7	59903.4	91750	73382.4	75133.7	30834.8	75042.4	-1.28313	6.19041e-22	1.21423e-20	RPL8	8	144789765	144792587	-	2159	protein_coding	ribosomal protein L8 [Source:HGNC Symbol;Acc:HGNC:10368]	-
ENSG00000213553	1308.78	1104.96	1185.76	1138.3	2341.5	4009.2	3189.45	3208.74	1184.45	3187.22	-1.42773	6.46463e-22	1.26691e-20	RPLP0P6	2	38481851	38482804	+	954	processed_pseudogene	ribosomal protein lateral stalk subunit P0 pseudogene 6 [Source:HGNC Symbol;Acc:HGNC:36404]	-
ENSG00000143384	7787.58	9201.45	6275.6	8225.51	3066.86	1880.3	3137.95	2521.15	7872.54	2651.56	1.56963	7.11004e-22	1.39095e-20	MCL1	1	150574551	150579738	-	4371	protein_coding	MCL1, BCL2 family apoptosis regulator [Source:HGNC Symbol;Acc:HGNC:6943]	-
ENSG00000205189	172.163	252.829	138.084	222.106	38.1766	35.7019	45.776	22.9195	196.296	35.6435	2.45999	7.54701e-22	1.47385e-20	ZBTB10	8	80485619	80526265	+	10216	protein_coding	zinc finger and BTB domain containing 10 [Source:HGNC Symbol;Acc:HGNC:30953]	-
ENSG00000189306	943.898	764.447	936.885	862.345	1676.59	1839.31	1861.94	1866.8	876.894	1811.16	-1.04618	7.81005e-22	1.52388e-20	RRP7A	22	42509968	42519802	-	4082	protein_coding	ribosomal RNA processing 7 homolog A [Source:HGNC Symbol;Acc:HGNC:24286]	-
ENSG00000142937	14481.4	13587.2	12285.5	14325	25978.1	35200.8	27577.8	31371.1	13669.8	30032	-1.13548	7.84204e-22	1.52879e-20	RPS8	1	44775251	44778779	+	2847	protein_coding	ribosomal protein S8 [Source:HGNC Symbol;Acc:HGNC:10441]	-
ENSG00000143079	650.107	783.175	542.703	752.133	272.539	215.534	225.447	269.305	682.03	245.706	1.47084	8.01116e-22	1.56039e-20	CTTNBP2NL	1	112396181	112463456	+	7404	protein_coding	CTTNBP2 N-terminal like [Source:HGNC Symbol;Acc:HGNC:25330]	-
ENSG00000114902	563.598	456.284	435.126	434.958	1098.64	1216.51	985.329	1102.43	472.492	1100.73	-1.21996	8.08835e-22	1.57405e-20	SPCS1	3	52704955	52711146	+	5324	protein_coding	signal peptidase complex subunit 1 [Source:HGNC Symbol;Acc:HGNC:23401]	-
ENSG00000108733	41.97	63.8458	59.4083	61.4158	188.762	255.203	227.736	182.21	56.66	213.478	-1.91079	8.10245e-22	1.57542e-20	PEX12	17	35574795	35578863	-	2861	protein_coding	peroxisomal biogenesis factor 12 [Source:HGNC Symbol;Acc:HGNC:8854]	-
ENSG00000102119	1497.22	1270.96	1175.32	1342.73	2645.85	3523.91	2843.84	2989.85	1321.56	3000.86	-1.18291	8.21386e-22	1.59569e-20	EMD	X	154379197	154381523	+	2020	protein_coding	emerin [Source:HGNC Symbol;Acc:HGNC:3331]	-
ENSG00000184574	255.246	214.522	219.168	230.519	66.8091	56.8586	59.5089	85.9483	229.864	67.2812	1.76893	8.88567e-22	1.7247e-20	LPAR5	12	6618835	6636447	-	3258	protein_coding	lysophosphatidic acid receptor 5 [Source:HGNC Symbol;Acc:HGNC:13307]	-
ENSG00000198938	53712.2	68150.7	56778.3	68436.5	127978	165284	127808	148787	61769.4	142464	-1.20563	9.03167e-22	1.75152e-20	MT-CO3	MT	9207	9990	+	784	protein_coding	mitochondrially encoded cytochrome c oxidase III [Source:HGNC Symbol;Acc:HGNC:7422]	-
ENSG00000135940	1509.21	1288.83	1218.67	1419.29	3400.9	4232.66	2663.02	3680.88	1359	3494.37	-1.36234	9.20081e-22	1.78277e-20	COX5B	2	97646040	97648383	+	1441	protein_coding	cytochrome c oxidase subunit 5B [Source:HGNC Symbol;Acc:HGNC:2269]	-
ENSG00000102962	498.501	351.577	272.957	373.543	103.925	93.8829	104.141	113.452	374.145	103.85	1.84721	9.55208e-22	1.84922e-20	CCL22	16	57358772	57366190	+	2929	protein_coding	C-C motif chemokine ligand 22 [Source:HGNC Symbol;Acc:HGNC:10621]	-
ENSG00000158373	78.8009	105.558	75.4646	106.847	249.209	321.317	287.245	319.728	91.6676	294.375	-1.68261	9.70093e-22	1.87641e-20	HIST1H2BD	6	26158146	26171349	+	871	protein_coding	histone cluster 1 H2B family member d [Source:HGNC Symbol;Acc:HGNC:4747]	-
ENSG00000167775	446.253	377.967	425.492	474.5	885.486	1164.94	952.142	1081.8	431.053	1021.09	-1.24336	9.7564e-22	1.88551e-20	CD320	19	8302127	8308356	-	2277	protein_coding	CD320 molecule [Source:HGNC Symbol;Acc:HGNC:16692]	-
ENSG00000137962	1272.81	1493.14	1060.52	1184.57	529.171	327.929	449.75	464.121	1252.76	442.742	1.4984	9.81594e-22	1.89537e-20	ARHGAP29	1	94148988	94275068	-	15524	protein_coding	Rho GTPase activating protein 29 [Source:HGNC Symbol;Acc:HGNC:30207]	-
ENSG00000182199	2769.17	2316.32	2788.18	2281.64	4884.49	7045.18	6191.21	6046.17	2538.83	6041.76	-1.25061	1.03972e-21	2.00586e-20	SHMT2	12	57229327	57234935	+	4838	protein_coding	serine hydroxymethyltransferase 2 [Source:HGNC Symbol;Acc:HGNC:10852]	-
ENSG00000189343	2556.75	2218.43	2286.42	2261.45	4558.93	7452.45	5925.71	5666.86	2330.76	5900.99	-1.33996	1.05139e-21	2.02664e-20	RPS2P46	17	19445970	19446852	-	883	processed_pseudogene	ribosomal protein S2 pseudogene 46 [Source:HGNC Symbol;Acc:HGNC:35839]	-
ENSG00000090263	167.88	186.43	168.591	191.819	444.334	437.679	386.808	454.953	178.68	430.943	-1.2703	1.06211e-21	2.04552e-20	MRPS33	7	141002610	141015228	-	5262	protein_coding	mitochondrial ribosomal protein S33 [Source:HGNC Symbol;Acc:HGNC:16634]	-
ENSG00000151366	138.758	120.881	97.9434	114.418	387.069	398.011	281.523	377.026	118	360.907	-1.61336	1.06564e-21	2.05055e-20	NDUFC2	11	78068304	78080219	-	2652	protein_coding	NADH:ubiquinone oxidoreductase subunit C2 [Source:HGNC Symbol;Acc:HGNC:7706]	-
ENSG00000272886	209.85	258.788	207.126	213.693	57.265	37.0242	66.3753	69.9046	222.364	57.6423	1.93977	1.112e-21	2.13791e-20	DCP1A	3	53283428	53347610	-	6127	protein_coding	decapping mRNA 1A [Source:HGNC Symbol;Acc:HGNC:18714]	-
ENSG00000119787	2174.73	2246.52	1530.17	1851.73	707.328	286.938	460.049	517.982	1950.79	493.074	1.98222	1.13863e-21	2.18723e-20	ATL2	2	38294880	38377285	-	4884	protein_coding	atlastin GTPase 2 [Source:HGNC Symbol;Acc:HGNC:24047]	-
ENSG00000055044	426.553	482.674	537.083	476.183	1233.32	987.754	1019.66	1233.07	480.623	1118.45	-1.21885	1.14107e-21	2.19002e-20	NOP58	2	202265716	202303666	+	3299	protein_coding	NOP58 ribonucleoprotein [Source:HGNC Symbol;Acc:HGNC:29926]	-
ENSG00000145741	5211.14	5115.32	4496.57	5175.75	9890.93	11407.4	9032.76	10045.6	4999.69	10094.2	-1.01356	1.27024e-21	2.43586e-20	BTF3	5	73498408	73505635	+	2467	protein_coding	basic transcription factor 3 [Source:HGNC Symbol;Acc:HGNC:1125]	-
ENSG00000185920	345.182	440.961	374.112	362.605	61.5068	35.7019	122.451	80.2184	380.715	74.9695	2.33873	1.28477e-21	2.46159e-20	PTCH1	9	95442980	95517057	-	16591	protein_coding	patched 1 [Source:HGNC Symbol;Acc:HGNC:9585]	-
ENSG00000113430	897.645	865.749	843.758	992.748	429.487	345.119	434.872	362.129	899.975	392.902	1.19399	1.293e-21	2.47524e-20	IRX4	5	1877413	1887236	-	2815	protein_coding	iroquois homeobox 4 [Source:HGNC Symbol;Acc:HGNC:6129]	Homeobox
ENSG00000102265	1839.83	1283.73	1452.29	1619.53	3175.02	4577.78	3951.62	4413.16	1548.84	4029.4	-1.37922	1.39931e-21	2.67645e-20	TIMP1	X	47582313	47586789	+	1541	protein_coding	TIMP metallopeptidase inhibitor 1 [Source:HGNC Symbol;Acc:HGNC:11820]	-
ENSG00000142669	2090.79	1603.81	1539	1978.77	3747.67	5282.57	4553.57	4430.35	1803.09	4503.54	-1.32047	1.44735e-21	2.76359e-20	SH3BGRL3	1	26279176	26281522	+	1786	protein_coding	SH3 domain binding glutamate rich protein like 3 [Source:HGNC Symbol;Acc:HGNC:15568]	-
ENSG00000117308	1353.32	1156.89	1458.71	1376.39	2583.29	3207.89	2719.1	2949.74	1336.33	2865	-1.09987	1.46592e-21	2.79665e-20	GALE	1	23795599	23800804	-	3978	protein_coding	UDP-galactose-4-epimerase [Source:HGNC Symbol;Acc:HGNC:4116]	-
ENSG00000115875	887.367	1108.36	1234.73	1180.36	2321.35	2833.68	2457.03	2529.17	1102.7	2535.31	-1.20069	1.47214e-21	2.80613e-20	SRSF7	2	38743599	38751494	-	4045	protein_coding	serine and arginine rich splicing factor 7 [Source:HGNC Symbol;Acc:HGNC:10789]	-
ENSG00000111843	925.91	807.011	849.378	910.3	1772.03	2113.03	1667.39	1800.33	873.15	1838.2	-1.07355	1.52008e-21	2.89503e-20	TMEM14C	6	10722915	10731129	+	1321	protein_coding	transmembrane protein 14C [Source:HGNC Symbol;Acc:HGNC:20952]	-
ENSG00000105991	668.951	656.335	523.435	671.367	211.032	144.13	264.357	191.378	630.022	202.724	1.63256	1.55757e-21	2.9639e-20	HOXA1	7	27092993	27095996	-	2539	protein_coding	homeobox A1 [Source:HGNC Symbol;Acc:HGNC:5099]	Homeobox
ENSG00000169242	7079.23	5082.97	3472.17	5846.28	1529.19	1488.9	1859.65	1796.89	5370.16	1668.66	1.68615	1.56621e-21	2.9778e-20	EFNA1	1	155127460	155134857	+	2539	protein_coding	ephrin A1 [Source:HGNC Symbol;Acc:HGNC:3221]	-
ENSG00000113658	1146.04	1380.77	871.857	987.7	446.455	294.872	341.032	375.88	1096.59	364.56	1.58679	1.60231e-21	3.04385e-20	SMAD5	5	136132845	136188747	+	9040	protein_coding	SMAD family member 5 [Source:HGNC Symbol;Acc:HGNC:6771]	MH1
ENSG00000168140	24.8394	11.0666	14.4507	21.8741	104.986	133.552	156.783	92.8241	18.0577	122.036	-2.75724	1.60745e-21	3.04971e-20	VASN	16	4371848	4383528	+	2806	protein_coding	vasorin [Source:HGNC Symbol;Acc:HGNC:18517]	-
ENSG00000174547	802.57	652.078	695.238	731.1	1461.32	1931.87	1498.02	1792.31	720.246	1670.88	-1.21357	1.60813e-21	3.04971e-20	MRPL11	11	66435075	66466738	-	2539	protein_coding	mitochondrial ribosomal protein L11 [Source:HGNC Symbol;Acc:HGNC:14042]	-
ENSG00000214706	519.058	445.218	633.421	499.739	1092.28	1396.34	1566.69	1437.06	524.359	1373.09	-1.38821	1.64391e-21	3.1149e-20	IFRD2	3	50287732	50292918	-	3712	protein_coding	interferon related developmental regulator 2 [Source:HGNC Symbol;Acc:HGNC:5457]	-
ENSG00000267069	1.71306	3.40511	1.60563	4.20656	55.144	72.7262	65.2309	72.1965	2.73259	66.3244	-4.6038	1.67422e-21	3.16964e-20	AP005264.1	18	12288308	12291488	+	733	lincRNA	novel transcript	-
ENSG00000165699	736.617	804.457	724.942	731.941	363.739	304.128	350.187	363.275	749.489	345.332	1.11602	1.68448e-21	3.18637e-20	TSC1	9	132891348	132946874	-	17600	protein_coding	TSC complex subunit 1 [Source:HGNC Symbol;Acc:HGNC:12362]	-
ENSG00000032219	207.281	366.049	286.605	263.331	78.4742	48.9249	62.9421	79.0724	280.816	67.3534	2.05361	1.73321e-21	3.27376e-20	ARID4A	14	58298385	58373887	+	7568	protein_coding	AT-rich interaction domain 4A [Source:HGNC Symbol;Acc:HGNC:9885]	ARID
ENSG00000215030	1033.83	778.067	968.998	892.632	1992.61	3580.77	2806.07	2469.58	918.383	2712.26	-1.56189	1.73362e-21	3.27376e-20	RPL13P12	17	17383377	17384012	-	636	processed_pseudogene	ribosomal protein L13 pseudogene 12 [Source:HGNC Symbol;Acc:HGNC:35701]	-
ENSG00000229117	18427.4	17383.1	15575.4	20052.7	35694.1	44775.5	35363.1	39135.1	17859.6	38742	-1.11718	1.74309e-21	3.28886e-20	RPL41	12	56116586	56117943	+	1088	protein_coding	ribosomal protein L41 [Source:HGNC Symbol;Acc:HGNC:10354]	-
ENSG00000161179	625.268	553.33	766.688	611.634	1288.46	1717.66	1631.92	1700.63	639.23	1584.67	-1.3091	1.75984e-21	3.31766e-20	YDJC	22	21628089	21630064	-	1754	protein_coding	YdjC chitooligosaccharide deacetylase homolog [Source:HGNC Symbol;Acc:HGNC:27158]	-
ENSG00000179674	13.7045	22.1332	19.2676	15.1436	86.9579	109.75	98.4185	114.598	17.5622	102.431	-2.54124	1.78748e-21	3.36632e-20	ARL14	3	160677159	160678452	+	1294	protein_coding	ADP ribosylation factor like GTPase 14 [Source:HGNC Symbol;Acc:HGNC:22974]	-
ENSG00000154359	549.893	558.438	470.45	491.326	232.241	204.956	199.126	226.903	517.527	215.807	1.2603	1.78867e-21	3.36632e-20	LONRF1	8	12721894	12756073	-	5685	protein_coding	LON peptidase N-terminal domain and ring finger 1 [Source:HGNC Symbol;Acc:HGNC:26302]	-
ENSG00000101040	322.056	405.208	457.604	438.324	154.827	83.3045	91.5521	115.744	405.798	111.357	1.85972	1.82143e-21	3.42508e-20	ZMYND8	20	47209214	47356889	-	7625	protein_coding	zinc finger MYND-type containing 8 [Source:HGNC Symbol;Acc:HGNC:9397]	-
ENSG00000179335	4515.63	3337.01	2636.44	3504.91	1075.31	1335.52	1399.6	1230.78	3498.5	1260.3	1.47319	1.844e-21	3.46461e-20	CLK3	15	74598500	74645414	+	20443	protein_coding	CDC like kinase 3 [Source:HGNC Symbol;Acc:HGNC:2071]	-
ENSG00000127922	1136.62	1200.3	960.969	1258.6	2582.23	2772.85	2188.1	2613.97	1139.12	2539.29	-1.15649	1.85586e-21	3.48395e-20	SEM1	7	96481626	96709891	-	11490	protein_coding	SEM1, 26S proteasome complex subunit [Source:HGNC Symbol;Acc:HGNC:10845]	-
ENSG00000166557	2344.33	1838.76	2054.4	1961.1	3883.41	5055.13	4519.24	4432.64	2049.65	4472.61	-1.12555	1.87779e-21	3.52216e-20	TMED3	15	79311062	79427432	+	19470	protein_coding	transmembrane p24 trafficking protein 3 [Source:HGNC Symbol;Acc:HGNC:28889]	-
ENSG00000244627	42.8266	45.1177	48.9717	53.0027	155.888	234.046	164.794	177.626	47.4797	183.089	-1.94313	2.04968e-21	3.84134e-20	TPTEP2	22	38335762	38398929	-	3851	transcribed_unprocessed_pseudogene	TPTE pseudogene 2 [Source:HGNC Symbol;Acc:HGNC:53828]	-
ENSG00000173660	2680.94	2508.71	2186.06	2630.78	4919.48	6230.65	4918.64	5489.23	2501.63	5389.5	-1.10717	2.06218e-21	3.86151e-20	UQCRH	1	46303631	46316776	+	1408	protein_coding	ubiquinol-cytochrome c reductase hinge protein [Source:HGNC Symbol;Acc:HGNC:12590]	-
ENSG00000139579	749.465	628.242	671.153	679.78	1279.98	1504.77	1603.31	1722.4	682.16	1527.61	-1.16296	2.09365e-21	3.91717e-20	NABP2	12	56222015	56229854	+	2218	protein_coding	nucleic acid binding protein 2 [Source:HGNC Symbol;Acc:HGNC:28412]	-
ENSG00000185475	291.221	201.753	227.197	199.391	571.589	859.491	653.453	656.645	229.89	685.295	-1.57475	2.09856e-21	3.92306e-20	TMEM179B	11	62787415	62790405	+	1496	protein_coding	transmembrane protein 179B [Source:HGNC Symbol;Acc:HGNC:33744]	-
ENSG00000170345	9231.7	12764	13475.2	12900.7	3819.78	4884.55	5467.95	4580.47	12092.9	4688.19	1.36716	2.11848e-21	3.95699e-20	FOS	14	75278774	75282230	+	3238	protein_coding	Fos proto-oncogene, AP-1 transcription factor subunit [Source:HGNC Symbol;Acc:HGNC:3796]	TF_bZIP
ENSG00000155545	299.786	373.711	214.352	266.696	69.9905	40.9911	72.0973	81.3644	288.636	66.1108	2.11901	2.16377e-21	4.0382e-20	MIER3	5	56919602	56971675	-	5763	protein_coding	MIER family member 3 [Source:HGNC Symbol;Acc:HGNC:26678]	Others
ENSG00000278189	0	0	0	0	116.651	153.386	179.671	142.101	0	147.952	-9.90595	2.23789e-21	4.17302e-20	RNA5-8SN2	21	8439823	8439975	+	153	rRNA	RNA, 5.8S ribosomal N2 [Source:HGNC Symbol;Acc:HGNC:53521]	-
ENSG00000107779	268.951	349.024	322.732	296.142	99.6834	46.2803	74.3861	98.554	309.212	79.726	1.94653	2.46274e-21	4.58848e-20	BMPR1A	10	86756601	86932838	+	11412	protein_coding	bone morphogenetic protein receptor type 1A [Source:HGNC Symbol;Acc:HGNC:1076]	-
ENSG00000223784	126.767	74.0611	133.267	106.005	375.404	408.589	341.032	330.041	110.025	363.766	-1.72367	2.49843e-21	4.65108e-20	LINP1	10	6709530	6740532	+	4118	lincRNA	lncRNA in non-homologous end joining pathway 1 [Source:HGNC Symbol;Acc:HGNC:53170]	-
ENSG00000152127	367.452	356.685	339.591	326.429	127.255	148.097	100.707	130.641	347.539	126.675	1.45905	2.64193e-21	4.91412e-20	MGAT5	2	134119983	134454621	+	8578	protein_coding	alpha-1,6-mannosylglycoprotein 6-beta-N-acetylglucosaminyltransferase [Source:HGNC Symbol;Acc:HGNC:7049]	-
ENSG00000167863	1135.76	1157.74	1009.14	1016.3	2158.04	2772.85	2253.33	2177.36	1079.74	2340.39	-1.11572	2.66269e-21	4.9486e-20	ATP5PD	17	75038863	75046985	-	3231	protein_coding	ATP synthase peripheral stalk subunit d [Source:HGNC Symbol;Acc:HGNC:845]	-
ENSG00000134058	1668.52	1553.58	1268.45	1435.28	634.156	518.339	466.916	683.002	1481.46	575.603	1.36298	2.66971e-21	4.95753e-20	CDK7	5	69234795	69277430	+	2416	protein_coding	cyclin dependent kinase 7 [Source:HGNC Symbol;Acc:HGNC:1778]	-
ENSG00000160471	549.037	457.987	336.379	515.724	149.525	150.742	156.783	113.452	464.782	142.625	1.70435	2.8326e-21	5.25562e-20	COX6B2	19	55349306	55354814	-	3815	protein_coding	cytochrome c oxidase subunit 6B2 [Source:HGNC Symbol;Acc:HGNC:24380]	-
ENSG00000234745	10369.2	8413.17	8497.8	9325.1	17407.5	25686.9	21677.2	20985.1	9151.31	21439.2	-1.22816	2.8354e-21	5.25645e-20	HLA-B	6	31269491	31357188	-	3051	protein_coding	major histocompatibility complex, class I, B [Source:HGNC Symbol;Acc:HGNC:4932]	-
ENSG00000237550	199.572	207.712	148.521	192.66	567.347	798.666	497.815	509.96	187.116	593.447	-1.66443	2.86249e-21	5.29847e-20	RPL9P9	15	82372196	82372912	-	717	transcribed_processed_pseudogene	ribosomal protein L9 pseudogene 9 [Source:HGNC Symbol;Acc:HGNC:17251]	-
ENSG00000166471	1042.4	1259.89	850.984	1144.18	448.575	403.3	327.299	428.595	1074.36	401.942	1.41791	2.86282e-21	5.29847e-20	TMEM41B	11	9280654	9314780	-	4422	protein_coding	transmembrane protein 41B [Source:HGNC Symbol;Acc:HGNC:28948]	-
ENSG00000167085	1285.65	1090.49	1131.97	1166.9	2111.38	2878.63	2769.45	2931.41	1168.75	2672.72	-1.1931	2.87022e-21	5.30777e-20	PHB	17	49404049	49414905	-	3838	protein_coding	prohibitin [Source:HGNC Symbol;Acc:HGNC:8912]	-
ENSG00000060237	1507.5	1747.67	1370.41	1529.51	755.049	591.065	732.417	647.477	1538.77	681.502	1.17378	2.91658e-21	5.38903e-20	WNK1	12	752593	911452	+	14370	protein_coding	WNK lysine deficient protein kinase 1 [Source:HGNC Symbol;Acc:HGNC:14540]	-
ENSG00000097007	1301.93	1146.67	1173.72	1106.33	448.575	329.251	527.569	507.668	1182.16	453.266	1.38123	2.92085e-21	5.39245e-20	ABL1	9	130713946	130887675	+	6276	protein_coding	ABL proto-oncogene 1, non-receptor tyrosine kinase [Source:HGNC Symbol;Acc:HGNC:76]	-
ENSG00000178464	1261.67	1002.8	956.955	1188.77	2372.25	4457.45	3134.51	3433.35	1102.55	3349.39	-1.6028	2.94573e-21	5.43389e-20	RPL10P16	19	12643275	12643919	-	645	processed_pseudogene	ribosomal protein L10 pseudogene 16 [Source:HGNC Symbol;Acc:HGNC:36882]	-
ENSG00000161981	304.925	269.855	295.436	328.112	608.705	725.939	766.749	865.213	299.582	741.652	-1.30746	2.99089e-21	5.51262e-20	SNRNP25	16	53010	57669	+	3060	protein_coding	small nuclear ribonucleoprotein U11/U12 subunit 25 [Source:HGNC Symbol;Acc:HGNC:14161]	-
ENSG00000204220	490.793	403.505	396.591	449.261	1016.98	1092.21	856.012	995.854	435.037	990.266	-1.18653	3.1866e-21	5.86851e-20	PFDN6	6	33289302	33298401	+	2953	protein_coding	prefoldin subunit 6 [Source:HGNC Symbol;Acc:HGNC:4926]	-
ENSG00000167272	174.732	190.686	207.126	188.454	418.883	453.547	434.872	497.354	190.25	451.164	-1.24489	3.33124e-21	6.12476e-20	POP5	12	120578764	120581398	-	2173	protein_coding	POP5 homolog, ribonuclease P/MRP subunit [Source:HGNC Symbol;Acc:HGNC:17689]	-
ENSG00000148303	32969.6	30392.3	30209.9	31930.3	57996.7	75752.9	58806.2	64483	31375.5	64259.7	-1.03426	3.41334e-21	6.27054e-20	RPL7A	9	133348214	133351426	+	2242	protein_coding	ribosomal protein L7a [Source:HGNC Symbol;Acc:HGNC:10364]	-
ENSG00000108528	1440.69	1150.93	1207.43	1323.38	2399.83	3176.15	2851.85	2891.3	1280.61	2829.78	-1.14361	3.43229e-21	6.30015e-20	SLC25A11	17	4937130	4940251	-	2669	protein_coding	solute carrier family 25 member 11 [Source:HGNC Symbol;Acc:HGNC:10981]	-
ENSG00000027075	370.878	439.259	369.295	383.638	152.707	170.576	129.317	146.685	390.768	149.821	1.3852	3.46381e-21	6.35279e-20	PRKCH	14	61187559	61550976	+	8833	protein_coding	protein kinase C eta [Source:HGNC Symbol;Acc:HGNC:9403]	-
ENSG00000139154	420.557	520.982	423.083	480.389	185.581	124.296	181.96	166.167	461.253	164.501	1.48293	3.58788e-21	6.57494e-20	AEBP2	12	19404045	19720801	+	6572	protein_coding	AE binding protein 2 [Source:HGNC Symbol;Acc:HGNC:24051]	zf-C2H2
ENSG00000135624	4662.96	3766.9	4519.85	4213.29	7716.98	9795.56	9218.15	9642.25	4290.75	9093.23	-1.08347	3.60925e-21	6.60866e-20	CCT7	2	73233420	73253021	+	3591	protein_coding	chaperonin containing TCP1 subunit 7 [Source:HGNC Symbol;Acc:HGNC:1622]	-
ENSG00000159579	413.705	487.782	397.393	403.83	158.009	76.6931	140.761	123.766	425.677	124.807	1.76304	3.63365e-21	6.64788e-20	RSPRY1	16	57186137	57240475	+	6064	protein_coding	ring finger and SPRY domain containing 1 [Source:HGNC Symbol;Acc:HGNC:29420]	-
ENSG00000110048	1803.86	1831.1	1733.28	1647.29	688.24	409.911	703.807	708.214	1753.88	627.543	1.48112	3.68475e-21	6.73585e-20	OSBP	11	59574398	59616144	-	5492	protein_coding	oxysterol binding protein [Source:HGNC Symbol;Acc:HGNC:8503]	-
ENSG00000068078	2842.83	2987.98	2569.01	3093.5	1026.53	1295.85	1479.71	1155.14	2873.33	1239.31	1.21356	3.81666e-21	6.97126e-20	FGFR3	4	1793293	1808872	+	4848	protein_coding	fibroblast growth factor receptor 3 [Source:HGNC Symbol;Acc:HGNC:3690]	-
ENSG00000172531	3474.09	3238.26	3266.65	3689.99	6236.58	8900.36	7423.73	7455.73	3417.25	7504.1	-1.13469	3.85695e-21	7.03909e-20	PPP1CA	11	67398183	67421183	-	2711	protein_coding	protein phosphatase 1 catalytic subunit alpha [Source:HGNC Symbol;Acc:HGNC:9281]	-
ENSG00000104343	450.536	493.741	297.042	371.86	144.223	80.6599	85.8301	96.2621	403.294	101.744	1.98117	4.02304e-21	7.33622e-20	UBE2W	8	73780097	73878910	-	9090	protein_coding	ubiquitin conjugating enzyme E2 W [Source:HGNC Symbol;Acc:HGNC:25616]	-
ENSG00000244398	1916.06	1731.5	1471.56	2192.46	4178.22	4789.35	3904.7	4895.61	1827.89	4441.97	-1.28101	4.03168e-21	7.34596e-20	AC116533.1	11	16974693	16975013	-	321	processed_pseudogene	ribosomal protein L36a (RPL36A) pseudogene	-
ENSG00000196182	513.062	460.541	432.717	524.979	191.944	204.956	215.147	193.67	482.825	201.429	1.26166	4.03529e-21	7.34653e-20	STK40	1	36339624	36385896	-	5590	protein_coding	serine/threonine kinase 40 [Source:HGNC Symbol;Acc:HGNC:21373]	-
ENSG00000112667	816.274	789.985	866.237	989.383	1643.72	2476.66	2335.72	2208.3	865.47	2166.1	-1.3231	4.28448e-21	7.7875e-20	DNPH1	6	43225629	43229484	-	1250	protein_coding	2'-deoxynucleoside 5'-phosphate N-hydrolase 1 [Source:HGNC Symbol;Acc:HGNC:21218]	-
ENSG00000165689	884.797	704.857	895.139	760.546	1702.04	1599.98	1787.55	1841.58	811.335	1732.79	-1.09479	4.32207e-21	7.84941e-20	ENTR1	9	136401922	136410609	-	3133	protein_coding	endosome associated trafficking regulator 1 [Source:HGNC Symbol;Acc:HGNC:10667]	-
ENSG00000165434	271.52	313.27	172.605	233.043	75.2928	44.958	45.776	46.9851	247.61	53.253	2.20979	4.36378e-21	7.91332e-20	PGM2L1	11	74330318	74398473	-	8820	protein_coding	phosphoglucomutase 2 like 1 [Source:HGNC Symbol;Acc:HGNC:20898]	-
ENSG00000285601	0	0	0.802815	1.68262	156.948	191.733	223.158	130.641	0.62136	175.62	-8.12678	4.36436e-21	7.91332e-20	AC084262.2	8	29351292	29360222	+	3263	bidirectional_promoter_lncRNA	novel transcript	-
ENSG00000124659	143.897	148.122	212.746	148.071	417.822	449.58	492.093	460.683	163.209	455.044	-1.47783	4.40597e-21	7.98229e-20	TBCC	6	42744481	42746096	-	1616	protein_coding	tubulin folding cofactor C [Source:HGNC Symbol;Acc:HGNC:11580]	-
ENSG00000187446	2431.69	2559.79	2014.26	2322.86	1180.29	1166.26	1090.61	1166.6	2332.15	1150.94	1.01875	4.4137e-21	7.98979e-20	CHP1	15	41230839	41281890	+	3950	protein_coding	calcineurin like EF-hand protein 1 [Source:HGNC Symbol;Acc:HGNC:17433]	-
ENSG00000250397	101.927	80.02	81.8871	88.3378	7.42324	11.9006	12.5884	6.87586	88.043	9.69704	3.19543	4.49658e-21	8.13323e-20	AP006623.1	11	856880	859795	-	2061	antisense	novel transcript	-
ENSG00000100433	111.349	114.071	170.197	153.119	28.6325	22.479	26.3212	13.7517	137.184	22.7961	2.5857	4.51108e-21	8.15285e-20	KCNK10	14	88180103	88326907	-	8258	protein_coding	potassium two pore domain channel subfamily K member 10 [Source:HGNC Symbol;Acc:HGNC:6273]	-
ENSG00000130772	114.775	110.666	172.605	144.706	411.459	429.746	450.894	349.523	135.688	410.405	-1.59516	4.80211e-21	8.6718e-20	MED18	1	28329002	28335967	+	2019	protein_coding	mediator complex subunit 18 [Source:HGNC Symbol;Acc:HGNC:25944]	-
ENSG00000108551	112.206	92.7892	60.2111	121.99	332.985	571.231	446.316	330.041	96.799	420.144	-2.1175	4.83131e-21	8.71746e-20	RASD1	17	17494437	17496395	-	1748	protein_coding	ras related dexamethasone induced 1 [Source:HGNC Symbol;Acc:HGNC:15828]	-
ENSG00000054965	451.392	555.033	526.647	502.263	178.158	215.534	228.88	170.751	508.834	198.331	1.3613	4.89537e-21	8.82592e-20	FAM168A	11	73400487	73598189	-	7887	protein_coding	family with sequence similarity 168 member A [Source:HGNC Symbol;Acc:HGNC:28999]	-
ENSG00000095564	668.951	829.995	599.703	574.616	261.934	245.947	272.367	250.969	668.316	257.804	1.37348	5.01004e-21	9.02536e-20	BTAF1	10	91923769	92030325	+	7582	protein_coding	B-TFIID TATA-box binding protein associated factor 1 [Source:HGNC Symbol;Acc:HGNC:17307]	-
ENSG00000033800	669.808	825.739	634.224	678.098	272.539	152.064	196.837	267.013	701.967	222.113	1.65625	5.12317e-21	9.22171e-20	PIAS1	15	68054179	68198603	+	10776	protein_coding	protein inhibitor of activated STAT 1 [Source:HGNC Symbol;Acc:HGNC:2752]	zf-MIZ
ENSG00000114742	512.206	487.782	441.548	474.5	219.516	215.534	185.393	184.502	479.009	201.236	1.25134	5.29328e-21	9.52022e-20	WDR48	3	39051998	39096671	+	7488	protein_coding	WD repeat domain 48 [Source:HGNC Symbol;Acc:HGNC:30914]	-
ENSG00000132432	1546.04	1406.31	1134.38	1421.82	3503.77	3284.58	2652.72	3483.77	1377.14	3231.21	-1.23057	5.30984e-21	9.54231e-20	SEC61G	7	54752250	54759974	-	1842	protein_coding	Sec61 translocon gamma subunit [Source:HGNC Symbol;Acc:HGNC:18277]	-
ENSG00000136231	260.386	462.243	417.464	390.369	125.135	76.6931	99.5629	105.43	382.615	101.705	1.90669	5.5211e-21	9.91308e-20	IGF2BP3	7	23310209	23470467	-	8511	protein_coding	insulin like growth factor 2 mRNA binding protein 3 [Source:HGNC Symbol;Acc:HGNC:28868]	-
ENSG00000213225	31.6917	21.2819	24.8873	22.7154	113.469	100.494	132.751	145.539	25.1441	123.063	-2.2933	5.52505e-21	9.91308e-20	NOC2LP1	2	130229379	130232106	+	2728	transcribed_processed_pseudogene	NOC2 like nucleolar associated transcriptional repressor pseudogene 1 [Source:HGNC Symbol;Acc:HGNC:52285]	-
ENSG00000168795	544.754	486.079	380.534	427.387	121.953	47.6026	136.184	107.722	459.688	103.365	2.14583	5.58864e-21	1.00191e-19	ZBTB5	9	37438114	37465399	-	4627	protein_coding	zinc finger and BTB domain containing 5 [Source:HGNC Symbol;Acc:HGNC:23836]	-
ENSG00000140382	330.621	358.388	279.38	286.046	107.107	79.3376	98.4185	121.474	313.609	101.584	1.6215	5.63965e-21	1.01024e-19	HMG20A	15	77420412	77485607	+	6403	protein_coding	high mobility group 20A [Source:HGNC Symbol;Acc:HGNC:5001]	HMG
ENSG00000141522	1725.91	1439.51	1416.97	1659.91	2918.39	3197.31	3457.24	3176.65	1560.57	3187.4	-1.03031	5.69755e-21	1.01925e-19	ARHGDIA	17	81867721	81871406	-	2903	protein_coding	Rho GDP dissociation inhibitor alpha [Source:HGNC Symbol;Acc:HGNC:678]	-
ENSG00000264247	11.1349	7.66149	19.2676	10.0957	86.9579	116.362	83.5413	84.8023	12.0399	92.9158	-2.93829	5.69909e-21	1.01925e-19	LINC00909	18	74591774	74598508	-	3742	lincRNA	long intergenic non-protein coding RNA 909 [Source:HGNC Symbol;Acc:HGNC:44331]	-
ENSG00000178982	2129.34	1918.78	2086.52	2298.46	3909.92	5635.62	4563.87	5146.58	2108.27	4814	-1.19094	6.08922e-21	1.08815e-19	EIF3K	19	38619082	38636955	+	2798	protein_coding	eukaryotic translation initiation factor 3 subunit K [Source:HGNC Symbol;Acc:HGNC:24656]	-
ENSG00000081019	193.576	256.234	179.831	185.93	55.144	54.2141	61.7977	48.131	203.893	54.8217	1.89427	6.14589e-21	1.0974e-19	RSBN1	1	113761832	113812476	-	6819	protein_coding	round spermatid basic protein 1 [Source:HGNC Symbol;Acc:HGNC:25642]	-
ENSG00000074054	910.493	1068.35	954.547	967.509	475.087	469.414	480.649	500.792	975.225	481.485	1.01802	6.27999e-21	1.12045e-19	CLASP1	2	121337776	121649587	-	11052	protein_coding	cytoplasmic linker associated protein 1 [Source:HGNC Symbol;Acc:HGNC:17088]	-
ENSG00000103260	844.54	545.669	798.801	699.13	1814.45	3279.29	2080.52	2223.2	722.035	2349.36	-1.70163	6.38121e-21	1.1376e-19	METRN	16	715115	719655	+	3692	protein_coding	meteorin, glial cell differentiation regulator [Source:HGNC Symbol;Acc:HGNC:14151]	-
ENSG00000166128	363.169	407.762	237.633	329.794	103.925	70.0816	91.5521	100.846	334.59	91.6012	1.86374	6.48208e-21	1.15466e-19	RAB8B	15	63189469	63267782	+	5200	protein_coding	RAB8B, member RAS oncogene family [Source:HGNC Symbol;Acc:HGNC:30273]	-
ENSG00000204356	1768.74	1487.18	1705.18	1784.42	3092.31	4052.83	3511.02	3625.87	1686.38	3570.51	-1.0819	6.63535e-21	1.18099e-19	NELFE	6	31952087	31959110	-	2719	protein_coding	negative elongation factor complex member E [Source:HGNC Symbol;Acc:HGNC:13974]	-
ENSG00000115306	5820.99	6111.32	4537.51	5426.46	2432.7	2709.38	2719.1	2459.27	5474.07	2580.11	1.08528	6.64051e-21	1.18099e-19	SPTBN1	2	54456285	54671445	+	18504	protein_coding	spectrin beta, non-erythrocytic 1 [Source:HGNC Symbol;Acc:HGNC:11275]	-
ENSG00000215845	540.471	441.813	499.351	459.356	1173.93	1724.27	1107.78	1197.55	485.248	1300.88	-1.42185	6.72095e-21	1.19435e-19	TSTD1	1	161037631	161038990	-	1210	protein_coding	thiosulfate sulfurtransferase like domain containing 1 [Source:HGNC Symbol;Acc:HGNC:35410]	-
ENSG00000146425	767.452	793.39	783.547	813.549	1474.04	1793.03	1475.13	1775.12	789.485	1629.33	-1.04481	6.83856e-21	1.21382e-19	DYNLT1	6	158636474	158644739	-	2949	protein_coding	dynein light chain Tctex-type 1 [Source:HGNC Symbol;Acc:HGNC:11697]	-
ENSG00000125356	860.814	806.159	798.801	1037.34	1836.72	1892.2	1774.97	2082.24	875.778	1896.53	-1.11476	6.8414e-21	1.21382e-19	NDUFA1	X	119871487	119876662	+	766	protein_coding	NADH:ubiquinone oxidoreductase subunit A1 [Source:HGNC Symbol;Acc:HGNC:7683]	-
ENSG00000182551	453.962	351.577	361.267	342.414	843.067	916.35	799.936	899.592	377.305	864.736	-1.19642	7.07401e-21	1.25409e-19	ADI1	2	3497361	3519736	-	5560	protein_coding	acireductone dioxygenase 1 [Source:HGNC Symbol;Acc:HGNC:30576]	-
ENSG00000132963	1187.15	1001.95	960.969	983.494	2571.62	2865.41	1948.92	2477.6	1033.39	2465.89	-1.2546	7.11186e-21	1.2598e-19	POMP	13	28659104	28678925	+	1428	protein_coding	proteasome maturation protein [Source:HGNC Symbol;Acc:HGNC:20330]	-
ENSG00000155287	1353.32	1791.09	1782.25	1765.07	637.338	491.893	733.561	712.798	1672.93	643.898	1.37647	7.18177e-21	1.27117e-19	SLC25A28	10	99610522	99620609	-	1755	protein_coding	solute carrier family 25 member 28 [Source:HGNC Symbol;Acc:HGNC:23472]	-
ENSG00000101752	1810.71	2197.15	1376.02	1540.44	687.179	715.361	576.778	564.967	1731.08	636.071	1.44467	7.3814e-21	1.30547e-19	MIB1	18	21704957	21870957	+	10033	protein_coding	mindbomb E3 ubiquitin protein ligase 1 [Source:HGNC Symbol;Acc:HGNC:21086]	-
ENSG00000059728	7827.84	8099.05	3024.2	6664.87	689.3	871.392	859.445	629.141	6403.99	762.32	3.07064	7.48698e-21	1.32309e-19	MXD1	2	69897688	69942945	+	6351	protein_coding	MAX dimerization protein 1 [Source:HGNC Symbol;Acc:HGNC:6761]	bHLH
ENSG00000243678	29.9786	24.687	34.521	31.9699	115.59	166.609	137.328	121.474	30.2891	135.25	-2.15388	7.62186e-21	1.34587e-19	NME2	17	51165435	51171747	+	2632	protein_coding	NME/NM23 nucleoside diphosphate kinase 2 [Source:HGNC Symbol;Acc:HGNC:7850]	-
ENSG00000183943	401.713	492.889	491.323	452.626	201.488	153.386	189.971	152.415	459.638	174.315	1.39598	8.00722e-21	1.41279e-19	PRKX	X	3604370	3713608	-	6452	protein_coding	protein kinase X-linked [Source:HGNC Symbol;Acc:HGNC:9441]	-
ENSG00000105379	467.666	383.075	490.52	506.47	952.295	1283.95	1068.87	1119.62	461.933	1106.18	-1.25889	8.09728e-21	1.42755e-19	ETFB	19	51345169	51366418	-	6526	protein_coding	electron transfer flavoprotein subunit beta [Source:HGNC Symbol;Acc:HGNC:3482]	-
ENSG00000147133	821.414	952.579	775.519	738.672	378.585	300.161	357.053	363.275	822.046	349.768	1.23088	8.21681e-21	1.44748e-19	TAF1	X	71366239	71532374	+	10860	protein_coding	TATA-box binding protein associated factor 1 [Source:HGNC Symbol;Acc:HGNC:11535]	-
ENSG00000075391	653.533	715.924	613.351	619.206	269.357	228.757	321.577	248.677	650.503	267.092	1.28234	8.31828e-21	1.4642e-19	RASAL2	1	178094141	178484147	+	16044	protein_coding	RAS protein activator like 2 [Source:HGNC Symbol;Acc:HGNC:9874]	-
ENSG00000179454	381.156	346.47	219.971	344.097	94.3811	51.5695	92.6965	74.4885	322.924	78.2839	2.03717	8.45111e-21	1.48641e-19	KLHL28	14	44924319	45042322	-	8076	protein_coding	kelch like family member 28 [Source:HGNC Symbol;Acc:HGNC:19741]	-
ENSG00000100290	280.086	267.301	241.647	258.283	566.287	755.03	563.045	686.44	261.829	642.701	-1.29453	8.48216e-21	1.49069e-19	BIK	22	43110748	43129712	+	953	protein_coding	BCL2 interacting killer [Source:HGNC Symbol;Acc:HGNC:1051]	-
ENSG00000140836	160.171	209.414	186.253	182.565	38.1766	52.8918	56.0757	52.7149	184.601	49.9648	1.89009	8.51004e-21	1.49442e-19	ZFHX3	16	72782885	73891871	-	22594	protein_coding	zinc finger homeobox 3 [Source:HGNC Symbol;Acc:HGNC:777]	Homeobox
ENSG00000160999	230.407	174.512	223.183	222.106	56.2045	56.8586	67.5197	69.9046	212.552	62.6219	1.76235	8.51755e-21	1.49456e-19	SH2B2	7	102285091	102321711	+	2384	protein_coding	SH2B adaptor protein 2 [Source:HGNC Symbol;Acc:HGNC:17381]	-
ENSG00000174444	35845	33830.6	32242.7	33737.5	64569.4	83434.1	62886	68446.9	33913.9	69834.1	-1.04204	9.00049e-21	1.57682e-19	RPL4	15	66498015	66524532	-	5637	protein_coding	ribosomal protein L4 [Source:HGNC Symbol;Acc:HGNC:10353]	-
ENSG00000113163	512.206	567.802	445.562	524.137	219.516	108.428	132.751	136.371	512.427	149.266	1.7737	9.09729e-21	1.59253e-19	COL4A3BP	5	75356345	75512138	-	18138	protein_coding	collagen type IV alpha 3 binding protein [Source:HGNC Symbol;Acc:HGNC:2205]	-
ENSG00000275198	0	0	5.6197	4.20656	67.8696	76.6931	60.6533	67.6126	2.45657	68.2071	-4.76746	9.57811e-21	1.67538e-19	AL512791.2	14	90383365	90387973	+	4609	lincRNA	novel transcript	-
ENSG00000157540	535.332	605.258	413.45	543.488	214.213	191.733	193.404	195.962	524.382	198.828	1.39776	9.76792e-21	1.70724e-19	DYRK1A	21	37365573	37526358	+	26602	protein_coding	dual specificity tyrosine phosphorylation regulated kinase 1A [Source:HGNC Symbol;Acc:HGNC:3091]	-
ENSG00000140988	49285.7	42489.8	47040.9	50565.4	88890.1	135666	105165	111534	47345.4	110314	-1.2203	9.86304e-21	1.72252e-19	RPS2	16	1962052	1964860	-	2413	protein_coding	ribosomal protein S2 [Source:HGNC Symbol;Acc:HGNC:10404]	-
ENSG00000102317	3183.73	3055.23	2660.53	2772.12	6281.12	6485.85	5188.72	5876.57	2917.9	5958.06	-1.02991	1.04051e-20	1.81576e-19	RBM3	X	48574449	48579066	+	3731	protein_coding	RNA binding motif protein 3 [Source:HGNC Symbol;Acc:HGNC:9900]	-
ENSG00000106683	1357.6	1501.65	1568.7	1701.13	501.599	424.456	733.561	571.842	1532.27	557.865	1.45682	1.05907e-20	1.84671e-19	LIMK1	7	74082933	74122525	+	6902	protein_coding	LIM domain kinase 1 [Source:HGNC Symbol;Acc:HGNC:6613]	-
ENSG00000178057	363.169	215.373	274.563	261.648	643.701	973.209	894.922	913.344	278.688	856.294	-1.6189	1.06508e-20	1.85573e-19	NDUFAF3	3	49020459	49023495	+	2434	protein_coding	NADH:ubiquinone oxidoreductase complex assembly factor 3 [Source:HGNC Symbol;Acc:HGNC:29918]	-
ENSG00000116221	1639.4	1425.04	1498.86	1476.5	2716.9	3440.61	2912.5	3229.36	1509.95	3074.84	-1.02572	1.06603e-20	1.85595e-19	MRPL37	1	54184041	54225464	+	2549	protein_coding	mitochondrial ribosomal protein L37 [Source:HGNC Symbol;Acc:HGNC:14034]	-
ENSG00000123349	2059.1	1875.36	1827.21	2115.06	3637.39	4401.92	3656.36	4177.09	1969.18	3968.19	-1.01072	1.08519e-20	1.88782e-19	PFDN5	12	53295291	53299450	+	3380	protein_coding	prefoldin subunit 5 [Source:HGNC Symbol;Acc:HGNC:8869]	-
ENSG00000093009	571.306	489.484	578.027	522.455	1027.59	1215.19	1142.11	1322.46	540.318	1176.84	-1.12253	1.10918e-20	1.92806e-19	CDC45	22	19479459	19520612	+	2846	protein_coding	cell division cycle 45 [Source:HGNC Symbol;Acc:HGNC:1739]	-
ENSG00000162892	5.99572	2.55383	4.81689	2.52394	51.9626	112.395	77.8193	56.1529	3.97259	74.5825	-4.22379	1.11877e-20	1.94321e-19	IL24	1	206897443	206904139	+	1979	protein_coding	interleukin 24 [Source:HGNC Symbol;Acc:HGNC:11346]	-
ENSG00000197712	386.296	372.859	427.098	377.749	155.888	170.576	121.307	154.707	391	150.619	1.37846	1.12935e-20	1.96006e-19	FAM114A1	4	38867677	38945739	+	4871	protein_coding	family with sequence similarity 114 member A1 [Source:HGNC Symbol;Acc:HGNC:25087]	-
ENSG00000125945	335.76	409.464	429.506	393.734	128.316	72.7262	144.195	126.057	392.116	117.824	1.72875	1.15278e-20	1.99917e-19	ZNF436	1	23359448	23369442	-	4392	protein_coding	zinc finger protein 436 [Source:HGNC Symbol;Acc:HGNC:20814]	zf-C2H2
ENSG00000171403	169.593	107.261	131.662	143.864	407.217	412.556	367.353	359.837	138.095	386.741	-1.48572	1.1546e-20	2.00076e-19	KRT9	17	41565841	41572058	-	2290	protein_coding	keratin 9 [Source:HGNC Symbol;Acc:HGNC:6447]	-
ENSG00000229638	179.015	185.578	189.464	204.439	462.362	452.225	415.418	567.259	189.624	474.316	-1.32284	1.16763e-20	2.02178e-19	RPL4P4	3	185417495	185418778	-	1284	processed_pseudogene	ribosomal protein L4 pseudogene 4 [Source:HGNC Symbol;Acc:HGNC:36179]	-
ENSG00000064607	1673.66	1548.47	1421.79	1387.32	729.598	694.204	779.337	772.388	1507.81	743.882	1.01882	1.1911e-20	2.06082e-19	SUGP2	19	18990888	19034023	-	8468	protein_coding	SURP and G-patch domain containing 2 [Source:HGNC Symbol;Acc:HGNC:18641]	-
ENSG00000119899	365.739	309.014	340.394	250.711	112.409	71.4039	105.285	91.6782	316.464	95.194	1.72729	1.19243e-20	2.06153e-19	SLC17A5	6	73593379	73654155	-	3604	protein_coding	solute carrier family 17 member 5 [Source:HGNC Symbol;Acc:HGNC:10933]	-
ENSG00000066135	619.272	732.098	556.351	630.984	286.325	200.989	262.068	225.757	634.676	243.785	1.37728	1.2197e-20	2.10703e-19	KDM4A	1	43650158	43705515	+	5172	protein_coding	lysine demethylase 4A [Source:HGNC Symbol;Acc:HGNC:22978]	-
ENSG00000130940	333.191	344.767	336.379	380.273	95.4416	111.073	152.205	124.911	348.653	120.908	1.5283	1.23065e-20	2.1243e-19	CASZ1	1	10636604	10796650	-	11336	protein_coding	castor zinc finger 1 [Source:HGNC Symbol;Acc:HGNC:26002]	Others
ENSG00000242622	11.9914	17.8768	18.4647	21.0328	100.744	108.428	89.2633	91.6782	17.3415	97.5284	-2.48875	1.29137e-20	2.22738e-19	AC092910.3	3	120094895	120136783	+	2194	lincRNA	novel transcript	-
ENSG00000177614	173.019	162.594	133.267	164.897	27.572	50.2472	37.7652	28.6494	158.444	36.0585	2.14863	1.39869e-20	2.40877e-19	PGBD5	1	230314482	230426371	-	11304	protein_coding	piggyBac transposable element derived 5 [Source:HGNC Symbol;Acc:HGNC:19405]	-
ENSG00000143507	3694.22	2624.49	1650.59	2609.75	599.161	782.798	896.066	684.148	2644.76	740.543	1.83674	1.41802e-20	2.44017e-19	DUSP10	1	221701424	221742176	-	2914	protein_coding	dual specificity phosphatase 10 [Source:HGNC Symbol;Acc:HGNC:3065]	-
ENSG00000087338	383.726	456.284	361.267	390.369	176.037	140.163	145.339	127.203	397.912	147.186	1.43219	1.43546e-20	2.46828e-19	GMCL1	2	69829642	69881396	+	4922	protein_coding	germ cell-less, spermatogenesis associated 1 [Source:HGNC Symbol;Acc:HGNC:23843]	-
ENSG00000160685	1617.99	1474.41	1422.59	1583.35	607.645	333.218	555.035	609.66	1524.58	526.389	1.53222	1.44947e-20	2.49045e-19	ZBTB7B	1	155002630	155018522	+	4303	protein_coding	zinc finger and BTB domain containing 7B [Source:HGNC Symbol;Acc:HGNC:18668]	ZBTB
ENSG00000255443	68.5225	94.4917	75.4646	82.4486	2.12092	3.96688	2.2888	4.58391	80.2319	3.24013	4.64859	1.46295e-20	2.51168e-19	CD44-AS1	11	35210343	35214985	-	587	antisense	CD44 antisense RNA 1 [Source:HGNC Symbol;Acc:HGNC:40133]	-
ENSG00000159256	409.422	546.52	432.717	455.15	181.339	96.5275	157.927	135.225	460.952	142.755	1.68527	1.52228e-20	2.61153e-19	MORC3	21	36320189	36386148	+	6408	protein_coding	MORC family CW-type zinc finger 3 [Source:HGNC Symbol;Acc:HGNC:23572]	-
ENSG00000188933	110.493	103.856	97.1406	79.0833	15.9069	10.5784	14.8772	14.8977	97.6431	14.0651	2.78436	1.53319e-20	2.62822e-19	USP32P1	17	16786489	16804455	+	9299	transcribed_unprocessed_pseudogene	ubiquitin specific peptidase 32 pseudogene 1 [Source:HGNC Symbol;Acc:HGNC:43570]	-
ENSG00000283078	4.28266	1.70255	6.42252	0.841312	62.5673	79.3376	66.3753	55.0069	3.31226	65.8218	-4.29768	1.54172e-20	2.64081e-19	AL137077.2	20	62066830	62068437	+	1608	lincRNA	novel transcript	-
ENSG00000099624	1688.22	1226.69	1491.63	1566.52	3033.98	4577.78	3568.24	3775.99	1493.27	3739	-1.32391	1.6655e-20	2.85065e-19	ATP5F1D	19	1241746	1244826	+	2250	protein_coding	ATP synthase F1 subunit delta [Source:HGNC Symbol;Acc:HGNC:837]	-
ENSG00000184402	706.638	889.584	789.97	842.153	311.776	203.633	354.764	240.655	807.087	277.707	1.5365	1.66853e-20	2.85364e-19	SS18L1	20	62143795	62182484	+	5094	protein_coding	SS18L1, nBAF chromatin remodeling complex subunit [Source:HGNC Symbol;Acc:HGNC:15592]	-
ENSG00000168143	406.852	492.889	268.14	352.51	115.59	63.4701	104.141	98.554	380.098	95.4388	1.98753	1.73018e-20	2.95557e-19	FAM83B	6	54846771	54942022	+	3167	protein_coding	family with sequence similarity 83 member B [Source:HGNC Symbol;Acc:HGNC:21357]	-
ENSG00000123411	88.2227	128.543	87.5068	103.481	20.1488	10.5784	10.2996	6.87586	101.938	11.9757	3.07304	1.73077e-20	2.95557e-19	IKZF4	12	56007659	56038435	+	6808	protein_coding	IKAROS family zinc finger 4 [Source:HGNC Symbol;Acc:HGNC:13179]	zf-C2H2
ENSG00000177200	558.458	718.478	546.717	572.933	272.539	228.757	216.292	195.962	599.147	228.387	1.39018	1.75282e-20	2.99092e-19	CHD9	16	53055033	53329150	+	16504	protein_coding	chromodomain helicase DNA binding protein 9 [Source:HGNC Symbol;Acc:HGNC:25701]	-
ENSG00000113645	931.906	933.851	870.251	956.572	410.399	279.004	391.385	428.595	923.145	377.346	1.28805	1.81766e-20	3.09919e-19	WWC1	5	168291651	168472303	+	10076	protein_coding	WW and C2 domain containing 1 [Source:HGNC Symbol;Acc:HGNC:29435]	-
ENSG00000105640	20084.8	16410.1	16350.9	19470.5	34524.4	56495	45583.8	46100.4	18079.1	45675.9	-1.33709	1.83422e-20	3.12265e-19	RPL18A	19	17859876	17864153	+	3527	protein_coding	ribosomal protein L18a [Source:HGNC Symbol;Acc:HGNC:10311]	-
ENSG00000067225	66594.5	58481.9	59488.6	62931	108495	145608	126171	123186	61874	125865	-1.02446	1.84851e-20	3.14458e-19	PKM	15	72199029	72231822	-	8571	protein_coding	pyruvate kinase M1/2 [Source:HGNC Symbol;Acc:HGNC:9021]	-
ENSG00000180758	340.043	516.725	429.506	560.314	147.404	81.9822	145.339	130.641	461.647	126.342	1.86444	1.85341e-20	3.15051e-19	GPR157	1	9100305	9129170	-	5372	protein_coding	G protein-coupled receptor 157 [Source:HGNC Symbol;Acc:HGNC:23687]	-
ENSG00000143971	244.111	359.239	363.675	356.716	111.349	71.4039	89.2633	111.16	330.935	95.7939	1.78345	1.88346e-20	3.19915e-19	ETAA1	2	67397319	67412089	+	7480	protein_coding	ETAA1, ATR kinase activator [Source:HGNC Symbol;Acc:HGNC:24648]	-
ENSG00000145780	713.491	774.662	374.112	669.684	155.888	109.75	189.971	171.897	632.987	156.876	2.00982	1.93296e-20	3.27576e-19	FEM1C	5	115520908	115544894	-	5816	protein_coding	fem-1 homolog C [Source:HGNC Symbol;Acc:HGNC:16933]	-
ENSG00000132950	414.561	406.91	303.464	366.812	128.316	89.916	125.884	143.247	372.937	121.841	1.6091	2.02859e-20	3.4352e-19	ZMYM5	13	19823482	19863636	-	3713	protein_coding	zinc finger MYM-type containing 5 [Source:HGNC Symbol;Acc:HGNC:13029]	-
ENSG00000171314	4528.48	4003.56	3358.17	3943.23	7604.57	9130.44	8314.07	8096.33	3958.36	8286.35	-1.06581	2.0555e-20	3.47813e-19	PGAM1	10	97426160	97433441	+	2568	protein_coding	phosphoglycerate mutase 1 [Source:HGNC Symbol;Acc:HGNC:8888]	-
ENSG00000154310	582.441	705.709	565.182	609.951	268.297	277.682	282.667	264.721	615.821	273.342	1.17198	2.11922e-20	3.58323e-19	TNIK	3	171061339	171460408	-	8523	protein_coding	TRAF2 and NCK interacting kinase [Source:HGNC Symbol;Acc:HGNC:30765]	-
ENSG00000162241	25.6959	24.687	36.1267	30.2872	120.893	121.651	141.906	118.036	29.1992	125.621	-2.10262	2.12266e-20	3.58633e-19	SLC25A45	11	65375192	65383701	-	7855	protein_coding	solute carrier family 25 member 45 [Source:HGNC Symbol;Acc:HGNC:27442]	-
ENSG00000145241	164.454	213.671	154.943	159.008	45.5999	25.1236	43.4872	45.8391	173.019	40.0124	2.10126	2.13331e-20	3.60159e-19	CENPC	4	67468748	67545606	-	8613	protein_coding	centromere protein C [Source:HGNC Symbol;Acc:HGNC:1854]	-
ENSG00000082641	12845.4	13149.7	10312.2	12726.5	5828.3	5591.98	6681.01	5772.29	12258.4	5968.4	1.0383	2.24882e-20	3.79373e-19	NFE2L1	17	48048329	48061487	+	5825	protein_coding	nuclear factor, erythroid 2 like 1 [Source:HGNC Symbol;Acc:HGNC:7781]	TF_bZIP
ENSG00000114631	0	0	4.01407	3.36525	54.0836	97.8498	68.6641	68.7586	1.84483	72.339	-5.26306	2.2615e-20	3.81225e-19	PODXL2	3	127629181	127672809	+	2186	protein_coding	podocalyxin like 2 [Source:HGNC Symbol;Acc:HGNC:17936]	-
ENSG00000198755	10595.3	9640.71	9225.15	10410.4	18541.1	25979.1	19866.8	22009.6	9967.89	21599.2	-1.11557	2.33726e-20	3.93698e-19	RPL10A	6	35468408	35470785	+	1501	protein_coding	ribosomal protein L10a [Source:HGNC Symbol;Acc:HGNC:10299]	-
ENSG00000095059	133.619	124.286	81.8871	120.308	15.9069	3.96688	18.3104	19.4816	115.025	14.4165	2.97215	2.4689e-20	4.15558e-19	DHPS	19	12675717	12681902	-	3006	protein_coding	deoxyhypusine synthase [Source:HGNC Symbol;Acc:HGNC:2869]	-
ENSG00000119559	549.037	450.326	516.21	582.188	1047.74	1458.49	1306.91	1172.33	524.44	1246.37	-1.24815	2.61639e-20	4.4005e-19	C19orf25	19	1461143	1479556	-	5111	protein_coding	chromosome 19 open reading frame 25 [Source:HGNC Symbol;Acc:HGNC:26711]	-
ENSG00000266074	768.309	744.016	767.491	766.435	379.645	256.525	346.754	309.414	761.563	323.084	1.23399	2.6844e-20	4.5115e-19	BAHCC1	17	81395475	81466332	+	13473	protein_coding	BAH domain and coiled-coil containing 1 [Source:HGNC Symbol;Acc:HGNC:29279]	-
ENSG00000115808	892.506	1222.43	762.674	817.755	384.948	290.905	292.967	312.852	923.842	320.418	1.52619	2.71985e-20	4.56762e-19	STRN	2	36843640	36966472	-	8345	protein_coding	striatin [Source:HGNC Symbol;Acc:HGNC:11424]	-
ENSG00000178385	173.019	188.983	139.69	159.008	40.2976	50.2472	43.4872	38.9632	165.175	43.2488	1.9379	2.7512e-20	4.61681e-19	PLEKHM3	2	207821288	208025560	-	11671	protein_coding	pleckstrin homology domain containing M3 [Source:HGNC Symbol;Acc:HGNC:34006]	-
ENSG00000151491	427.409	518.428	415.055	471.976	191.944	202.311	187.682	169.605	458.217	187.885	1.28702	2.76688e-20	4.63963e-19	EPS8	12	15620158	15882329	-	8692	protein_coding	epidermal growth factor receptor pathway substrate 8 [Source:HGNC Symbol;Acc:HGNC:3420]	-
ENSG00000143437	872.806	1035.15	783.547	915.347	418.883	382.143	407.407	424.011	901.713	408.111	1.14278	2.79607e-20	4.68504e-19	ARNT	1	150809705	150876768	-	6516	protein_coding	aryl hydrocarbon receptor nuclear translocator [Source:HGNC Symbol;Acc:HGNC:700]	bHLH
ENSG00000175906	1895.5	1449.72	1331.07	1712.91	622.491	433.712	648.875	649.769	1597.3	588.712	1.43862	2.87316e-20	4.8106e-19	ARL4D	17	43398959	43401137	+	1612	protein_coding	ADP ribosylation factor like GTPase 4D [Source:HGNC Symbol;Acc:HGNC:656]	-
ENSG00000112033	1026.12	973.861	921.632	990.224	377.525	366.275	516.125	434.325	977.96	423.563	1.20643	2.95351e-20	4.94142e-19	PPARD	6	35342558	35428191	+	4457	protein_coding	peroxisome proliferator activated receptor delta [Source:HGNC Symbol;Acc:HGNC:9235]	THR-like
ENSG00000020577	507.923	432.449	476.069	396.258	173.916	128.263	195.693	163.875	453.175	165.436	1.45025	2.97469e-20	4.97313e-19	SAMD4A	14	54567097	54793315	+	12170	protein_coding	sterile alpha motif domain containing 4A [Source:HGNC Symbol;Acc:HGNC:23023]	-
ENSG00000173272	1133.19	920.23	1191.38	1367.97	2434.82	3615.15	2917.08	2898.18	1153.19	2966.31	-1.36267	3.02171e-20	5.04796e-19	MZT2A	2	131464900	131492743	-	4093	protein_coding	mitotic spindle organizing protein 2A [Source:HGNC Symbol;Acc:HGNC:33187]	-
ENSG00000157657	238.116	253.681	228.802	207.804	68.93	78.0154	66.3753	89.3862	232.101	75.6767	1.6185	3.28374e-20	5.48159e-19	ZNF618	9	113876282	114056591	+	10384	protein_coding	zinc finger protein 618 [Source:HGNC Symbol;Acc:HGNC:29416]	zf-C2H2
ENSG00000061936	888.223	858.938	829.308	855.614	313.897	174.543	323.866	338.063	858.021	287.592	1.57374	3.34514e-20	5.57895e-19	SFSWAP	12	131711081	131799737	+	10157	protein_coding	splicing factor SWAP [Source:HGNC Symbol;Acc:HGNC:10790]	-
ENSG00000197756	13459.5	12404	11924.2	15475.1	27724.7	31479.9	25100.2	33239.1	13315.7	29385.9	-1.14199	3.34707e-20	5.57895e-19	RPL37A	2	216498189	216579180	+	6841	protein_coding	ribosomal protein L37a [Source:HGNC Symbol;Acc:HGNC:10348]	-
ENSG00000113580	934.476	1161.14	828.505	957.413	382.827	189.088	313.566	323.165	970.384	302.162	1.68001	3.39674e-20	5.65751e-19	NR3C1	5	143277931	143435512	-	9172	protein_coding	nuclear receptor subfamily 3 group C member 1 [Source:HGNC Symbol;Acc:HGNC:7978]	ESR-like
ENSG00000158985	477.088	601.002	435.126	498.057	179.218	91.2383	149.917	176.48	502.818	149.213	1.74712	3.44027e-20	5.72574e-19	CDC42SE2	5	131245493	131398447	+	6024	protein_coding	CDC42 small effector 2 [Source:HGNC Symbol;Acc:HGNC:18547]	-
ENSG00000174871	8.56531	10.2153	13.6479	17.6676	65.7487	126.94	99.5629	92.8241	12.524	96.269	-2.93565	3.5221e-20	5.85723e-19	CNIH2	11	66278190	66285301	+	2069	protein_coding	cornichon family AMPA receptor auxiliary protein 2 [Source:HGNC Symbol;Acc:HGNC:28744]	-
ENSG00000167524	132.762	133.65	113.197	127.879	31.8139	13.2229	29.7544	22.9195	126.872	24.4277	2.35842	3.52453e-20	5.85723e-19	SGK494	17	28607964	28614200	-	4663	protein_coding	uncharacterized serine/threonine-protein kinase SgK494 [Source:NCBI gene;Acc:124923]	-
ENSG00000151292	304.069	430.746	329.957	316.333	116.651	119.006	114.44	130.641	345.276	120.185	1.52249	3.54145e-20	5.88044e-19	CSNK1G3	5	123512099	123617045	+	5000	protein_coding	casein kinase 1 gamma 3 [Source:HGNC Symbol;Acc:HGNC:2456]	-
ENSG00000164171	1357.6	1831.1	1327.05	1554.74	699.905	474.704	617.977	507.668	1517.62	575.063	1.39862	3.54377e-20	5.88044e-19	ITGA2	5	52989326	53094779	+	7910	protein_coding	integrin subunit alpha 2 [Source:HGNC Symbol;Acc:HGNC:6137]	-
ENSG00000173264	580.728	450.326	611.745	605.745	1238.62	1837.99	1395.03	1354.54	562.136	1456.54	-1.37272	3.6053e-20	5.9781e-19	GPR137	11	64270062	64289500	+	4031	protein_coding	G protein-coupled receptor 137 [Source:HGNC Symbol;Acc:HGNC:24300]	-
ENSG00000130520	2268.95	1903.46	2031.12	2147.87	4203.67	5734.79	4115.27	4618.29	2087.85	4668	-1.16056	3.77065e-20	6.24762e-19	LSM4	19	18306230	18323274	-	3029	protein_coding	LSM4 homolog, U6 small nuclear RNA and mRNA degradation associated [Source:HGNC Symbol;Acc:HGNC:17259]	-
ENSG00000234432	11.9914	9.36405	11.2394	10.9371	79.5347	97.8498	70.9529	68.7586	10.883	79.274	-2.86152	3.80796e-20	6.30477e-19	AC092171.3	7	5426277	5428927	-	2651	lincRNA	uncharacterized LOC100129484 [Source:NCBI gene;Acc:100129484]	-
ENSG00000205076	77.9444	63.8458	77.0702	121.99	279.962	452.225	292.967	323.165	85.2127	337.08	-1.98202	3.91605e-20	6.47411e-19	LGALS7	19	38770971	38773492	-	795	protein_coding	galectin 7 [Source:HGNC Symbol;Acc:HGNC:6568]	-
ENSG00000070614	2285.23	2457.64	2202.92	2407.84	1085.91	827.756	1207.34	1094.41	2338.41	1053.86	1.14893	3.96972e-20	6.55312e-19	NDST1	5	150485818	150558211	+	9529	protein_coding	N-deacetylase and N-sulfotransferase 1 [Source:HGNC Symbol;Acc:HGNC:7680]	-
ENSG00000008869	579.015	663.996	554.745	576.299	256.632	281.649	240.324	279.618	593.514	264.556	1.16668	4.00011e-20	6.59841e-19	HEATR5B	2	36968383	37084342	-	8206	protein_coding	HEAT repeat containing 5B [Source:HGNC Symbol;Acc:HGNC:29273]	-
ENSG00000177156	3498.93	3020.33	3462.54	3438.44	6492.15	9130.44	6849.24	7114.22	3355.06	7396.51	-1.14032	4.19152e-20	6.90903e-19	TALDO1	11	747329	765024	+	3005	protein_coding	transaldolase 1 [Source:HGNC Symbol;Acc:HGNC:11559]	-
ENSG00000198408	3285.65	3453.63	2615.57	2964.78	1616.14	1221.8	1308.05	1285.79	3079.91	1357.95	1.18085	4.27126e-20	7.03527e-19	OGA	10	101784443	101818465	-	7247	protein_coding	O-GlcNAcase [Source:HGNC Symbol;Acc:HGNC:7056]	-
ENSG00000197256	943.898	979.82	879.082	954.048	416.762	288.26	428.006	425.157	939.212	389.546	1.26714	4.32283e-20	7.11496e-19	KANK2	19	11164267	11197791	-	7638	protein_coding	KN motif and ankyrin repeat domains 2 [Source:HGNC Symbol;Acc:HGNC:29300]	-
ENSG00000088808	774.304	822.334	716.914	900.204	382.827	349.086	392.53	357.545	803.439	370.497	1.11577	4.35475e-20	7.16221e-19	PPP1R13B	14	103733195	103847590	-	9588	protein_coding	protein phosphatase 1 regulatory subunit 13B [Source:HGNC Symbol;Acc:HGNC:14950]	-
ENSG00000125850	202.141	234.101	232.816	270.061	84.837	55.5364	46.9204	71.0506	234.78	64.5861	1.856	4.39816e-20	7.22829e-19	OVOL2	20	17956979	18059188	-	2175	protein_coding	ovo like zinc finger 2 [Source:HGNC Symbol;Acc:HGNC:15804]	zf-C2H2
ENSG00000146373	515.632	683.575	510.59	551.901	246.027	206.278	224.303	232.633	565.425	227.31	1.31281	4.52057e-20	7.42399e-19	RNF217	6	124962545	125092633	+	12779	protein_coding	ring finger protein 217 [Source:HGNC Symbol;Acc:HGNC:21487]	-
ENSG00000162645	993.576	984.927	740.195	881.695	384.948	420.49	384.519	336.917	900.099	381.718	1.2382	4.54577e-20	7.45988e-19	GBP2	1	89106132	89150456	-	6276	protein_coding	guanylate binding protein 2 [Source:HGNC Symbol;Acc:HGNC:4183]	-
ENSG00000062598	842.827	753.38	726.547	620.888	314.957	318.673	310.133	341.501	735.911	321.316	1.19547	4.57765e-20	7.50667e-19	ELMO2	20	46366049	46432985	-	6598	protein_coding	engulfment and cell motility 2 [Source:HGNC Symbol;Acc:HGNC:17233]	-
ENSG00000143033	474.518	543.966	382.943	397.941	131.497	46.2803	105.285	126.057	449.842	102.28	2.12936	4.72026e-20	7.73485e-19	MTF2	1	93079235	93139081	+	5909	protein_coding	metal response element binding transcription factor 2 [Source:HGNC Symbol;Acc:HGNC:29535]	-
ENSG00000130724	1580.3	1187.53	1372.81	1470.61	2625.7	3467.06	3158.55	3249.99	1402.81	3125.32	-1.15545	4.77308e-20	7.81565e-19	CHMP2A	19	58551566	58555124	-	2129	protein_coding	charged multivesicular body protein 2A [Source:HGNC Symbol;Acc:HGNC:30216]	-
ENSG00000125538	2244.11	1814.92	1263.63	1714.59	4286.39	7228.98	5310.02	5067.51	1759.31	5473.23	-1.63732	4.91095e-20	8.02962e-19	IL1B	2	112829751	112836903	-	3096	protein_coding	interleukin 1 beta [Source:HGNC Symbol;Acc:HGNC:5992]	-
ENSG00000196419	5894.65	5609.92	5398.93	5071.43	10320.4	13135.7	10060.4	11436.8	5493.73	11238.3	-1.03248	4.92664e-20	8.04937e-19	XRCC6	22	41621119	41664048	+	3288	protein_coding	X-ray repair cross complementing 6 [Source:HGNC Symbol;Acc:HGNC:4055]	-
ENSG00000198315	386.296	423.085	260.915	300.348	108.167	109.75	106.429	81.3644	342.661	101.428	1.75659	5.02081e-20	8.19722e-19	ZKSCAN8	6	28141910	28159472	+	7565	protein_coding	zinc finger with KRAB and SCAN domains 8 [Source:HGNC Symbol;Acc:HGNC:12983]	zf-C2H2
ENSG00000157600	864.24	783.175	752.238	780.738	345.711	408.589	373.075	304.83	795.098	358.051	1.15255	5.39572e-20	8.80288e-19	TMEM164	X	110002631	110182734	+	6583	protein_coding	transmembrane protein 164 [Source:HGNC Symbol;Acc:HGNC:26217]	-
ENSG00000102531	667.238	657.186	517.013	530.027	264.055	222.145	219.725	248.677	592.866	238.651	1.31105	5.4289e-20	8.85053e-19	FNDC3A	13	48975912	49209779	+	7698	protein_coding	fibronectin type III domain containing 3A [Source:HGNC Symbol;Acc:HGNC:20296]	-
ENSG00000178980	1678.8	1481.22	1438.64	1610.27	3241.83	4280.27	2954.84	3513.57	1552.23	3497.63	-1.17178	5.50978e-20	8.96942e-19	SELENOW	19	47778572	47784686	+	5261	protein_coding	selenoprotein W [Source:HGNC Symbol;Acc:HGNC:10752]	-
ENSG00000163755	710.921	686.129	545.914	625.936	309.655	251.236	246.046	241.801	642.225	262.185	1.29071	5.50986e-20	8.96942e-19	HPS3	3	149129584	149173732	+	6256	protein_coding	HPS3, biogenesis of lysosomal organelles complex 2 subunit 1 [Source:HGNC Symbol;Acc:HGNC:15597]	-
ENSG00000184887	634.69	598.448	765.885	789.151	1390.27	1533.86	1582.71	1686.88	697.043	1548.43	-1.15115	5.66845e-20	9.21412e-19	BTBD6	14	105248490	105251093	+	2392	protein_coding	BTB domain containing 6 [Source:HGNC Symbol;Acc:HGNC:19897]	-
ENSG00000153292	708.351	901.502	789.167	849.725	379.645	257.847	265.501	343.793	812.187	311.697	1.37924	5.70072e-20	9.25983e-19	ADGRF1	6	46997703	47042363	-	12401	protein_coding	adhesion G protein-coupled receptor F1 [Source:HGNC Symbol;Acc:HGNC:18990]	-
ENSG00000134802	209.85	204.306	223.183	192.66	544.017	423.134	567.623	674.98	207.5	552.439	-1.41366	5.95845e-20	9.67142e-19	SLC43A3	11	57406954	57427580	-	4517	protein_coding	solute carrier family 43 member 3 [Source:HGNC Symbol;Acc:HGNC:17466]	-
ENSG00000143222	364.882	349.024	302.661	383.638	696.724	880.648	761.027	838.855	350.051	794.313	-1.18164	6.07059e-20	9.84627e-19	UFC1	1	161152776	161158856	+	2274	protein_coding	ubiquitin-fold modifier conjugating enzyme 1 [Source:HGNC Symbol;Acc:HGNC:26941]	-
ENSG00000198918	7814.99	7804.51	6290.86	8663.83	16527.3	17613	14321	17279	7643.55	16435.1	-1.10447	6.14986e-20	9.9676e-19	RPL39	X	119786504	119791643	-	2141	protein_coding	ribosomal protein L39 [Source:HGNC Symbol;Acc:HGNC:10350]	-
ENSG00000075131	92.5054	101.302	113.197	110.212	347.832	243.302	284.956	352.961	104.304	307.263	-1.56022	6.23051e-20	1.0091e-18	TIPIN	15	66336206	66386746	-	2755	protein_coding	TIMELESS interacting protein [Source:HGNC Symbol;Acc:HGNC:30750]	-
ENSG00000146731	5294.22	4702.45	4490.14	3963.42	9616.27	9016.72	8722.63	9784.35	4612.56	9284.99	-1.00938	6.28743e-20	1.01758e-18	CCT6A	7	56051630	56063989	+	3901	protein_coding	chaperonin containing TCP1 subunit 6A [Source:HGNC Symbol;Acc:HGNC:1620]	-
ENSG00000102554	4411.14	5792.09	4411.47	5333.92	2378.62	2165.92	2479.92	2389.36	4987.15	2353.45	1.08325	6.33471e-20	1.02449e-18	KLF5	13	73054976	73077542	+	3893	protein_coding	Kruppel like factor 5 [Source:HGNC Symbol;Acc:HGNC:6349]	zf-C2H2
ENSG00000110888	444.54	442.664	399.802	384.48	196.185	126.94	148.772	140.955	417.871	153.213	1.44266	6.6934e-20	1.08171e-18	CAPRIN2	12	30709552	30754951	-	8392	protein_coding	caprin family member 2 [Source:HGNC Symbol;Acc:HGNC:21259]	-
ENSG00000242299	519.058	440.961	492.928	588.918	1077.43	1286.59	1041.41	1322.46	510.467	1181.97	-1.21089	6.90344e-20	1.11485e-18	AC073861.1	3	101576489	101576947	-	459	processed_pseudogene	ribosomal protein S18 (RPS18) pseudogene	-
ENSG00000172270	18030	14800.3	15359.5	16817.8	31145.8	43900.2	35581.7	33169.2	16251.9	35949.2	-1.14532	7.30873e-20	1.17945e-18	BSG	19	571277	583493	+	3797	protein_coding	basigin (Ok blood group) [Source:HGNC Symbol;Acc:HGNC:1116]	-
ENSG00000105197	666.381	538.007	606.125	554.425	1100.76	1360.64	1270.29	1317.87	591.235	1262.39	-1.09384	7.3304e-20	1.18209e-18	TIMM50	19	39480412	39493785	+	6911	protein_coding	translocase of inner mitochondrial membrane 50 [Source:HGNC Symbol;Acc:HGNC:23656]	-
ENSG00000146223	646.681	734.652	872.66	722.687	1847.33	1412.21	2032.46	1916.07	744.17	1802.02	-1.27612	7.53696e-20	1.21452e-18	RPL7L1	6	42879618	42889925	+	7809	protein_coding	ribosomal protein L7 like 1 [Source:HGNC Symbol;Acc:HGNC:21370]	-
ENSG00000034677	815.418	978.969	629.407	836.264	301.171	354.375	242.613	248.677	815.014	286.709	1.50871	7.63922e-20	1.23011e-18	RNF19A	8	100257060	100336218	-	6031	protein_coding	ring finger protein 19A, RBR E3 ubiquitin protein ligase [Source:HGNC Symbol;Acc:HGNC:13432]	-
ENSG00000170802	275.803	378.818	195.084	270.902	81.6556	51.5695	70.9529	71.0506	280.152	68.8071	2.0194	7.73385e-20	1.24355e-18	FOXN2	2	48314637	48379294	+	5481	protein_coding	forkhead box N2 [Source:HGNC Symbol;Acc:HGNC:5281]	Fork
ENSG00000141552	1045.82	915.974	1102.26	1221.59	2002.15	3069.04	2767.16	2852.34	1071.41	2672.67	-1.3184	7.95137e-20	1.2776e-18	ANAPC11	17	81890790	81900991	+	4027	protein_coding	anaphase promoting complex subunit 11 [Source:HGNC Symbol;Acc:HGNC:14452]	-
ENSG00000114315	4128.48	3173.56	1799.91	3691.68	808.072	1052.55	918.954	920.219	3198.41	924.948	1.79021	8.05058e-20	1.29261e-18	HES1	3	194136145	194138732	+	2062	protein_coding	hes family bHLH transcription factor 1 [Source:HGNC Symbol;Acc:HGNC:5192]	bHLH
ENSG00000100376	663.812	660.591	549.125	655.382	296.929	259.17	294.111	233.779	632.228	270.997	1.2208	8.15915e-20	1.3091e-18	FAM118A	22	45308968	45341955	+	6512	protein_coding	family with sequence similarity 118 member A [Source:HGNC Symbol;Acc:HGNC:1313]	-
ENSG00000111540	2555.89	2319.73	1632.12	2103.28	973.504	728.584	835.413	849.169	2152.76	846.668	1.34547	8.19364e-20	1.31369e-18	RAB5B	12	55973913	55996683	+	6588	protein_coding	RAB5B, member RAS oncogene family [Source:HGNC Symbol;Acc:HGNC:9784]	-
ENSG00000178026	727.195	557.586	720.125	659.589	240.725	280.326	297.544	297.954	666.124	279.137	1.25575	8.23495e-20	1.31937e-18	LRRC75B	22	24585620	24593208	-	3422	protein_coding	leucine rich repeat containing 75B [Source:HGNC Symbol;Acc:HGNC:33155]	-
ENSG00000102978	874.519	723.585	769.097	729.418	1404.05	1676.67	1675.4	1801.48	774.155	1639.4	-1.08226	8.63043e-20	1.38174e-18	POLR2C	16	57462387	57472010	+	3940	protein_coding	RNA polymerase II subunit C [Source:HGNC Symbol;Acc:HGNC:9189]	-
ENSG00000227057	542.184	463.095	597.294	487.12	1123.03	1034.03	1242.82	1355.69	522.423	1188.89	-1.18642	8.73059e-20	1.39677e-18	WDR46	6	33279108	33289527	-	3115	protein_coding	WD repeat domain 46 [Source:HGNC Symbol;Acc:HGNC:13923]	-
ENSG00000182158	949.893	842.764	708.886	714.274	357.376	360.986	333.021	307.122	803.954	339.626	1.24331	8.97685e-20	1.43514e-18	CREB3L2	7	137874979	138002067	-	8788	protein_coding	cAMP responsive element binding protein 3 like 2 [Source:HGNC Symbol;Acc:HGNC:23720]	TF_bZIP
ENSG00000013306	2848.82	2326.54	2747.23	2602.18	4818.74	7147	6123.69	5805.52	2631.19	5973.74	-1.18271	9.45406e-20	1.51035e-18	SLC25A39	17	44319625	44324870	-	3526	protein_coding	solute carrier family 25 member 39 [Source:HGNC Symbol;Acc:HGNC:24279]	-
ENSG00000123983	4514.78	4327.89	3331.68	3849.84	2002.15	1980.8	1817.31	1865.65	4006.05	1916.48	1.06369	9.53438e-20	1.52209e-18	ACSL3	2	222860934	222944639	+	7240	protein_coding	acyl-CoA synthetase long chain family member 3 [Source:HGNC Symbol;Acc:HGNC:3570]	-
ENSG00000156697	295.503	267.301	280.985	273.426	809.133	523.628	845.712	851.461	279.304	757.484	-1.44061	9.74421e-20	1.55447e-18	UTP14A	X	129906121	129929761	+	4087	protein_coding	UTP14A, small subunit processome component [Source:HGNC Symbol;Acc:HGNC:10665]	-
ENSG00000118689	2883.94	3468.1	1903.47	3075	901.393	1085.6	1081.46	1017.63	2832.63	1021.52	1.47163	1.00725e-19	1.60569e-18	FOXO3	6	108559835	108684774	+	7721	protein_coding	forkhead box O3 [Source:HGNC Symbol;Acc:HGNC:3821]	Fork
ENSG00000131495	382.013	345.618	294.633	347.462	881.244	1291.88	773.615	883.548	342.432	957.572	-1.48282	1.01366e-19	1.61476e-18	NDUFA2	5	140638740	140647785	-	1488	protein_coding	NADH:ubiquinone oxidoreductase subunit A2 [Source:HGNC Symbol;Acc:HGNC:7685]	-
ENSG00000159921	251.82	275.814	274.563	286.887	102.865	52.8918	86.9745	52.7149	272.271	73.8615	1.87366	1.03679e-19	1.65043e-18	GNE	9	36214441	36277056	-	5921	protein_coding	glucosamine (UDP-N-acetyl)-2-epimerase/N-acetylmannosamine kinase [Source:HGNC Symbol;Acc:HGNC:23657]	-
ENSG00000254999	882.227	838.508	647.069	826.168	1671.29	1802.29	1619.33	1696.05	798.493	1697.24	-1.08795	1.04016e-19	1.65461e-18	BRK1	3	10115592	10127190	+	1233	protein_coding	BRICK1, SCAR/WAVE actin nucleating complex subunit [Source:HGNC Symbol;Acc:HGNC:23057]	-
ENSG00000143674	216.702	291.137	244.056	230.519	88.0184	47.6026	76.6749	53.8609	245.604	66.5392	1.87541	1.07102e-19	1.70249e-18	MAP3K21	1	233327768	233385148	+	7916	protein_coding	mitogen-activated protein kinase kinase kinase 21 [Source:HGNC Symbol;Acc:HGNC:29798]	-
ENSG00000167548	1501.5	1683.83	1265.24	1404.99	571.589	302.805	583.645	427.449	1463.89	471.372	1.63287	1.08696e-19	1.7266e-18	KMT2D	12	49018975	49059774	-	20485	protein_coding	lysine methyltransferase 2D [Source:HGNC Symbol;Acc:HGNC:7133]	-
ENSG00000137393	322.056	337.957	270.549	315.492	128.316	113.717	101.852	121.474	311.513	116.34	1.41912	1.12589e-19	1.78588e-18	RNF144B	6	18387350	18468874	+	5175	protein_coding	ring finger protein 144B [Source:HGNC Symbol;Acc:HGNC:21578]	-
ENSG00000125347	4653.54	3629.85	1865.74	3948.28	534.473	342.474	555.035	527.149	3524.35	489.783	2.84665	1.14405e-19	1.8134e-18	IRF1	5	132481609	132490798	-	7799	protein_coding	interferon regulatory factor 1 [Source:HGNC Symbol;Acc:HGNC:6116]	IRF
ENSG00000140990	1738.76	1478.67	1544.62	1913.98	3145.33	4228.7	3573.96	4119.79	1669.01	3766.94	-1.17422	1.1693e-19	1.85212e-18	NDUFB10	16	1959508	1961975	+	1070	protein_coding	NADH:ubiquinone oxidoreductase subunit B10 [Source:HGNC Symbol;Acc:HGNC:7696]	-
ENSG00000004059	2213.28	1996.24	2064.04	2281.64	3839.93	5934.46	5236.78	4763.83	2138.8	4943.75	-1.20858	1.188e-19	1.88039e-18	ARF5	7	127588345	127591705	+	1871	protein_coding	ADP ribosylation factor 5 [Source:HGNC Symbol;Acc:HGNC:658]	-
ENSG00000168575	1213.71	1179.87	1244.36	1257.76	633.096	476.026	595.089	624.557	1223.92	582.192	1.07025	1.23125e-19	1.94747e-18	SLC20A2	8	42416475	42541926	-	6641	protein_coding	solute carrier family 20 member 2 [Source:HGNC Symbol;Acc:HGNC:10947]	-
ENSG00000165959	355.461	412.018	418.267	384.48	167.553	179.832	155.639	154.707	392.556	164.433	1.2571	1.27162e-19	2.00991e-18	CLMN	14	95181940	95319906	-	15701	protein_coding	calmin [Source:HGNC Symbol;Acc:HGNC:19972]	-
ENSG00000133794	290.364	315.824	247.267	273.426	97.5625	108.428	104.141	74.4885	281.72	96.1549	1.55279	1.28114e-19	2.02352e-18	ARNTL	11	13276652	13387266	+	6726	protein_coding	aryl hydrocarbon receptor nuclear translocator like [Source:HGNC Symbol;Acc:HGNC:701]	bHLH
ENSG00000178951	1240.26	1333.1	1280.49	1426.02	600.222	445.613	661.464	599.346	1319.97	576.661	1.19314	1.31907e-19	2.08194e-18	ZBTB7A	19	4044364	4066945	-	5725	protein_coding	zinc finger and BTB domain containing 7A [Source:HGNC Symbol;Acc:HGNC:18078]	ZBTB
ENSG00000170160	82.227	163.445	88.3096	94.2269	12.7255	2.64459	13.7328	2.29195	107.052	7.84873	3.73748	1.3216e-19	2.08446e-18	CCDC144A	17	16689537	16777881	+	15568	protein_coding	coiled-coil domain containing 144A [Source:HGNC Symbol;Acc:HGNC:29072]	-
ENSG00000144043	668.951	557.586	639.041	549.377	1128.33	1286.59	1279.44	1383.19	603.739	1269.39	-1.07182	1.32479e-19	2.08801e-18	TEX261	2	70985938	70994945	-	4260	protein_coding	testis expressed 261 [Source:HGNC Symbol;Acc:HGNC:30712]	-
ENSG00000069667	159.315	235.804	145.309	180.041	42.4185	54.2141	36.6208	35.5253	180.117	42.1947	2.09983	1.34532e-19	2.11888e-18	RORA	15	60488284	61229319	-	17040	protein_coding	RAR related orphan receptor A [Source:HGNC Symbol;Acc:HGNC:10258]	THR-like
ENSG00000133265	919.058	578.868	907.181	837.105	1763.55	2681.61	2209.84	2412.28	810.553	2266.82	-1.48328	1.36205e-19	2.14371e-18	HSPBP1	19	55262231	55280381	-	2159	protein_coding	HSPA (Hsp70) binding protein 1 [Source:HGNC Symbol;Acc:HGNC:24989]	-
ENSG00000260708	149.036	84.2764	81.8871	126.197	339.348	507.761	381.086	371.297	110.349	399.873	-1.85703	1.36506e-19	2.14694e-18	AL118516.1	22	46761894	46762563	-	670	antisense	novel transcript, antisense to TBC1D22A	-
ENSG00000140199	1262.53	1881.32	1396.1	1533.71	667.031	655.858	659.175	559.237	1518.41	635.325	1.257	1.5315e-19	2.40702e-18	SLC12A6	15	34229996	34338060	-	10056	protein_coding	solute carrier family 12 member 6 [Source:HGNC Symbol;Acc:HGNC:10914]	-
ENSG00000183648	250.964	251.127	241.647	320.54	678.696	622.801	595.089	837.709	266.069	683.574	-1.36179	1.53632e-19	2.41288e-18	NDUFB1	14	92116122	92121917	-	2263	protein_coding	NADH:ubiquinone oxidoreductase subunit B1 [Source:HGNC Symbol;Acc:HGNC:7695]	-
ENSG00000261423	5.99572	3.40511	10.4366	13.461	69.9905	97.8498	75.5305	69.9046	8.3246	78.3188	-3.22565	1.60393e-19	2.5173e-18	TMEM202-AS1	15	72407778	72475168	-	2713	lincRNA	TMEM202 antisense RNA 1 [Source:HGNC Symbol;Acc:HGNC:53265]	-
ENSG00000270170	295.503	244.316	311.492	304.555	589.617	840.979	764.46	673.834	288.967	717.223	-1.3101	1.62216e-19	2.54413e-18	NCBP2-AS2	3	196942623	196943540	+	918	protein_coding	NCBP2 antisense RNA 2 (head to head) [Source:HGNC Symbol;Acc:HGNC:25121]	-
ENSG00000140743	729.765	704.006	727.35	722.687	235.423	179.832	350.187	224.611	720.952	247.513	1.54026	1.65177e-19	2.58873e-18	CDR2	16	22345936	22437165	-	3948	protein_coding	cerebellar degeneration related protein 2 [Source:HGNC Symbol;Acc:HGNC:1799]	-
ENSG00000228305	100.214	56.1843	85.9012	83.2899	223.758	280.326	272.367	278.472	81.3974	263.731	-1.69474	1.78782e-19	2.8e-18	AC016734.1	2	63622178	63622831	-	654	processed_pseudogene	PRELI domain containing 1 (PRELID1) pseudogene	-
ENSG00000133740	126.767	129.394	122.028	95.0683	26.5116	5.28918	21.7436	14.8977	118.314	17.1105	2.76152	1.8518e-19	2.89817e-18	E2F5	8	85177225	85217158	+	5928	protein_coding	E2F transcription factor 5 [Source:HGNC Symbol;Acc:HGNC:3119]	E2F
ENSG00000109917	844.54	797.647	846.167	768.118	1480.41	1555.02	1912.29	1824.4	814.118	1693.03	-1.05632	1.87473e-19	2.93199e-18	ZPR1	11	116773799	116788050	-	7069	protein_coding	ZPR1 zinc finger [Source:HGNC Symbol;Acc:HGNC:13051]	-
ENSG00000174500	237.259	217.076	106.774	156.484	39.2371	11.9006	27.4656	17.1897	179.398	23.9483	2.88711	1.88763e-19	2.9501e-18	GCSAM	3	112120841	112133305	-	3783	protein_coding	germinal center associated signaling and motility [Source:HGNC Symbol;Acc:HGNC:20253]	-
ENSG00000065308	459.101	504.807	539.492	392.051	199.367	124.296	180.815	150.123	473.863	163.65	1.52962	1.89663e-19	2.9621e-18	TRAM2	6	52497402	52576915	-	6908	protein_coding	translocation associated membrane protein 2 [Source:HGNC Symbol;Acc:HGNC:16855]	-
ENSG00000257042	1.71306	3.40511	12.845	2.52394	51.9626	105.784	90.4077	87.0942	5.12179	83.812	-4.01051	1.91867e-19	2.99442e-18	AC008011.2	12	27958517	27969813	+	792	antisense	novel transcript, antisense to PTHLH	-
ENSG00000107521	555.889	503.105	535.478	540.964	954.416	1290.56	1218.79	1124.2	533.859	1146.99	-1.10251	1.96175e-19	3.0595e-18	HPS1	10	98416198	98446947	-	5301	protein_coding	HPS1, biogenesis of lysosomal organelles complex 3 subunit 1 [Source:HGNC Symbol;Acc:HGNC:5163]	-
ENSG00000177697	4227.84	3609.41	3961.09	4392.49	7148.58	10532.1	9192.97	9219.38	4047.71	9023.25	-1.15643	1.97111e-19	3.07195e-18	CD151	11	832843	839831	+	3938	protein_coding	CD151 molecule (Raph blood group) [Source:HGNC Symbol;Acc:HGNC:1630]	-
ENSG00000137942	412.848	446.92	344.408	347.462	135.739	166.609	141.906	111.16	387.91	138.853	1.4851	1.98321e-19	3.08866e-18	FNBP1L	1	93448131	93554661	+	5798	protein_coding	formin binding protein 1 like [Source:HGNC Symbol;Acc:HGNC:20851]	-
ENSG00000136153	761.456	744.867	614.153	657.065	334.046	327.929	295.256	303.684	694.385	315.228	1.13922	2.01852e-19	3.14146e-18	LMO7	13	75620434	75859870	+	14367	protein_coding	LIM domain 7 [Source:HGNC Symbol;Acc:HGNC:6646]	-
ENSG00000213386	0	0	0.802815	0	112.409	294.872	215.147	138.663	0.200704	190.273	-9.54566	2.03121e-19	3.159e-18	AC022217.1	5	172762521	172763258	-	738	processed_pseudogene	family with sequence similarity 58, member A (FAM58A) pseudogene	-
ENSG00000237512	128.48	160.04	165.38	203.598	471.906	671.725	428.006	461.829	164.374	508.366	-1.62714	2.05198e-19	3.18907e-18	UNC5B-AS1	10	71217224	71218228	-	707	antisense	UNC5B antisense RNA 1 [Source:HGNC Symbol;Acc:HGNC:45096]	-
ENSG00000054148	902.784	802.754	833.322	1070.99	1708.4	2348.39	2094.25	2231.22	902.463	2095.57	-1.21508	2.05545e-19	3.19225e-18	PHPT1	9	136848724	136851027	+	1612	protein_coding	phosphohistidine phosphatase 1 [Source:HGNC Symbol;Acc:HGNC:30033]	-
ENSG00000006831	2590.15	2777.72	1943.61	2471.77	1211.05	990.398	997.918	1098.99	2445.81	1074.59	1.18595	2.07387e-19	3.21861e-18	ADIPOR2	12	1688574	1788678	+	5878	protein_coding	adiponectin receptor 2 [Source:HGNC Symbol;Acc:HGNC:24041]	-
ENSG00000150991	35335.3	34048.5	28605.1	38599.4	11755.2	15050.4	14750.2	17326	34147.1	14720.4	1.21397	2.14009e-19	3.31907e-18	UBC	12	124911604	124917368	-	3898	protein_coding	ubiquitin C [Source:HGNC Symbol;Acc:HGNC:12468]	-
ENSG00000146833	847.11	829.144	934.477	789.151	371.162	301.483	440.594	342.647	849.97	363.972	1.22202	2.29712e-19	3.56013e-18	TRIM4	7	99876958	99919600	-	4891	protein_coding	tripartite motif containing 4 [Source:HGNC Symbol;Acc:HGNC:16275]	-
ENSG00000115053	5287.37	5319.63	5631.75	4963.74	11994.9	8869.95	10989.7	11943.4	5300.62	10949.5	-1.04672	2.30749e-19	3.57373e-18	NCL	2	231453531	231483641	-	6929	protein_coding	nucleolin [Source:HGNC Symbol;Acc:HGNC:7667]	-
ENSG00000153933	281.799	274.962	194.281	181.723	73.1719	39.6688	52.6425	60.7368	233.191	56.555	2.03495	2.31175e-19	3.57783e-18	DGKE	17	56834099	56869567	+	10933	protein_coding	diacylglycerol kinase epsilon [Source:HGNC Symbol;Acc:HGNC:2852]	-
ENSG00000145247	950.75	834.251	782.745	880.854	1917.32	2168.56	1678.84	1657.08	862.15	1855.45	-1.10553	2.3642e-19	3.65648e-18	OCIAD2	4	48885019	48906937	-	2483	protein_coding	OCIA domain containing 2 [Source:HGNC Symbol;Acc:HGNC:28685]	-
ENSG00000163346	1453.53	1276.06	1232.32	1484.07	687.179	671.725	572.201	685.294	1361.5	654.1	1.05755	2.38505e-19	3.68616e-18	PBXIP1	1	154944076	154956123	-	3851	protein_coding	PBX homeobox interacting protein 1 [Source:HGNC Symbol;Acc:HGNC:21199]	-
ENSG00000135870	388.009	463.946	333.168	389.527	155.888	80.6599	114.44	132.933	393.663	120.98	1.69552	2.39954e-19	3.70599e-18	RC3H1	1	173931214	174022297	-	11508	protein_coding	ring finger and CCCH-type domains 1 [Source:HGNC Symbol;Acc:HGNC:29434]	-
ENSG00000196396	3267.67	3096.09	2291.23	3035.45	1309.67	1102.79	1313.77	1393.51	2922.61	1279.94	1.19068	2.48007e-19	3.82771e-18	PTPN1	20	50510321	50585241	+	4041	protein_coding	protein tyrosine phosphatase, non-receptor type 1 [Source:HGNC Symbol;Acc:HGNC:9642]	-
ENSG00000006712	516.488	412.018	443.957	510.676	900.332	1076.35	1011.65	1042.84	470.785	1007.79	-1.09765	2.49114e-19	3.84215e-18	PAF1	19	39385852	39391195	-	2668	protein_coding	PAF1 homolog, Paf1/RNA polymerase II complex component [Source:HGNC Symbol;Acc:HGNC:25459]	-
ENSG00000179918	253.533	284.327	329.154	291.094	721.114	559.33	725.55	731.133	289.527	684.282	-1.24149	2.55783e-19	3.94227e-18	SEPHS2	16	30443631	30446181	-	2551	protein_coding	selenophosphate synthetase 2 [Source:HGNC Symbol;Acc:HGNC:19686]	-
ENSG00000105825	195.289	135.353	114	86.6551	446.455	511.728	419.995	487.04	132.824	466.304	-1.81217	2.5853e-19	3.98186e-18	TFPI2	7	93885396	93890991	-	2682	protein_coding	tissue factor pathway inhibitor 2 [Source:HGNC Symbol;Acc:HGNC:11761]	-
ENSG00000005483	696.36	1089.63	903.167	902.728	310.715	134.874	288.389	246.385	897.972	245.091	1.86994	2.62008e-19	4.03265e-18	KMT2E	7	105014179	105114361	+	9231	protein_coding	lysine methyltransferase 2E [Source:HGNC Symbol;Acc:HGNC:18541]	-
ENSG00000076984	1172.59	1018.13	1010.74	1098.75	577.952	474.704	541.302	505.376	1075.05	524.833	1.03309	2.64467e-19	4.06768e-18	MAP2K7	19	7903843	7914478	+	5145	protein_coding	mitogen-activated protein kinase kinase 7 [Source:HGNC Symbol;Acc:HGNC:6847]	-
ENSG00000197860	322.912	315.824	265.732	297.824	97.5625	129.585	88.1189	113.452	300.573	107.179	1.49219	2.66795e-19	4.10067e-18	SGTB	5	65665928	65723035	-	5748	protein_coding	small glutamine rich tetratricopeptide repeat containing beta [Source:HGNC Symbol;Acc:HGNC:23567]	-
ENSG00000106829	327.195	477.566	354.844	471.976	158.009	112.395	138.473	134.079	407.895	135.739	1.58374	2.76188e-19	4.24211e-18	TLE4	9	79571773	79726882	+	8187	protein_coding	transducin like enhancer of split 4 [Source:HGNC Symbol;Acc:HGNC:11840]	-
ENSG00000166171	260.386	190.686	207.929	218.741	537.654	554.041	476.071	500.792	219.435	517.14	-1.2367	2.80123e-19	4.29959e-18	DPCD	10	101570560	101609668	+	1718	protein_coding	deleted in primary ciliary dyskinesia homolog (mouse) [Source:HGNC Symbol;Acc:HGNC:24542]	-
ENSG00000105514	555.889	582.273	561.97	653.699	255.571	284.293	286.1	239.509	588.458	266.369	1.14467	2.85162e-19	4.37392e-18	RAB3D	19	11322046	11346270	-	4417	protein_coding	RAB3D, member RAS oncogene family [Source:HGNC Symbol;Acc:HGNC:9779]	-
ENSG00000082805	567.88	646.119	630.21	580.505	285.264	281.649	243.757	199.4	606.179	252.518	1.26401	2.97437e-19	4.55906e-18	ERC1	12	990509	1495933	+	13484	protein_coding	ELKS/RAB6-interacting/CAST family member 1 [Source:HGNC Symbol;Acc:HGNC:17072]	-
ENSG00000123353	284.368	254.532	241.647	310.444	643.701	556.686	676.341	784.994	272.748	665.43	-1.28773	2.97808e-19	4.56161e-18	ORMDL2	12	55817919	55821879	+	2810	protein_coding	ORMDL sphingolipid biosynthesis regulator 2 [Source:HGNC Symbol;Acc:HGNC:16037]	-
ENSG00000164715	1014.99	1044.52	917.617	867.393	364.799	186.443	381.086	315.144	961.129	311.868	1.62076	2.99026e-19	4.57713e-18	LMTK2	7	98106885	98209633	+	9139	protein_coding	lemur tyrosine kinase 2 [Source:HGNC Symbol;Acc:HGNC:17880]	-
ENSG00000177830	1223.13	966.199	1192.18	1169.42	2089.11	2961.94	2561.17	2613.97	1137.73	2556.55	-1.16761	3.04318e-19	4.65494e-18	CHID1	11	867860	915058	-	5984	protein_coding	chitinase domain containing 1 [Source:HGNC Symbol;Acc:HGNC:28474]	-
ENSG00000138772	396.574	331.147	348.422	330.636	700.965	753.708	698.085	775.826	351.695	732.146	-1.0576	3.10224e-19	4.74203e-18	ANXA3	4	78551519	78610451	+	5123	protein_coding	annexin A3 [Source:HGNC Symbol;Acc:HGNC:541]	-
ENSG00000116649	892.506	517.576	728.153	560.314	1740.22	1724.27	2161.77	2550.94	674.637	2044.3	-1.5995	3.1871e-19	4.86841e-18	SRM	1	11054584	11060024	-	1898	protein_coding	spermidine synthase [Source:HGNC Symbol;Acc:HGNC:11296]	-
ENSG00000106100	547.324	601.002	556.351	513.2	256.632	249.914	275.801	255.553	554.469	259.475	1.09501	3.19022e-19	4.86984e-18	NOD1	7	30424527	30478784	-	6820	protein_coding	nucleotide binding oligomerization domain containing 1 [Source:HGNC Symbol;Acc:HGNC:16390]	-
ENSG00000163602	387.152	391.587	205.521	293.618	72.1114	51.5695	81.2525	96.2621	319.47	75.2989	2.08038	3.26491e-19	4.98043e-18	RYBP	3	72371825	72446621	-	7215	protein_coding	RING1 and YY1 binding protein [Source:HGNC Symbol;Acc:HGNC:10480]	-
ENSG00000131473	7283.09	7130.3	6077.31	6908.01	3105.03	3030.7	3847.48	3550.24	6849.68	3383.36	1.01746	3.28287e-19	5.00231e-18	ACLY	17	41866908	41930542	-	5217	protein_coding	ATP citrate lyase [Source:HGNC Symbol;Acc:HGNC:115]	-
ENSG00000242550	97.6446	110.666	106.774	98.4335	257.692	448.258	304.411	303.684	103.38	328.511	-1.66492	3.28373e-19	5.00231e-18	SERPINB10	18	63897174	63936111	+	2700	protein_coding	serpin family B member 10 [Source:HGNC Symbol;Acc:HGNC:8942]	-
ENSG00000231500	24913.9	22807.4	21547.6	27692.6	44453.5	57473.5	47984.7	55260.2	24240.4	51293	-1.08134	3.29193e-19	5.01138e-18	RPS18	6	33272010	33276510	+	1898	protein_coding	ribosomal protein S18 [Source:HGNC Symbol;Acc:HGNC:10401]	-
ENSG00000141040	9.42185	23.8358	28.9013	11.7784	101.804	116.362	116.729	135.225	18.4843	117.53	-2.66318	3.46651e-19	5.27354e-18	ZNF287	17	16551387	16569206	-	3566	protein_coding	zinc finger protein 287 [Source:HGNC Symbol;Acc:HGNC:13502]	zf-C2H2
ENSG00000128567	710.921	679.319	612.548	623.412	300.111	342.474	272.367	271.597	656.55	296.637	1.14787	3.54298e-19	5.3862e-18	PODXL	7	131500262	131558217	-	6874	protein_coding	podocalyxin like [Source:HGNC Symbol;Acc:HGNC:9171]	-
ENSG00000025293	624.411	686.981	590.069	632.667	313.897	224.79	266.645	292.224	633.532	274.389	1.20405	3.63254e-19	5.51859e-18	PHF20	20	35771974	35950381	+	8383	protein_coding	PHD finger protein 20 [Source:HGNC Symbol;Acc:HGNC:16098]	-
ENSG00000165895	113.062	157.486	117.211	135.451	32.8743	33.0574	26.3212	21.7736	130.803	28.5066	2.19989	3.70762e-19	5.62882e-18	ARHGAP42	11	100687653	100993941	+	8948	protein_coding	Rho GTPase activating protein 42 [Source:HGNC Symbol;Acc:HGNC:26545]	-
ENSG00000126822	2242.4	2337.61	2204.53	2850.37	1047.74	866.103	1248.54	937.409	2408.73	1024.95	1.23215	3.91825e-19	5.94455e-18	PLEKHG3	14	64704102	64750247	+	11910	protein_coding	pleckstrin homology and RhoGEF domain containing G3 [Source:HGNC Symbol;Acc:HGNC:20364]	-
ENSG00000197329	480.514	573.761	350.83	518.248	170.734	136.196	187.682	134.079	480.838	157.173	1.6108	3.99407e-19	6.05546e-18	PELI1	2	64092652	64144454	-	4125	protein_coding	pellino E3 ubiquitin protein ligase 1 [Source:HGNC Symbol;Acc:HGNC:8827]	-
ENSG00000162244	10851.4	9370.86	8549.18	10184.1	19071.4	29378.7	21203.5	22603.2	9738.88	23064.2	-1.24379	4.06108e-19	6.15286e-18	RPL29	3	51993522	51995942	-	2058	protein_coding	ribosomal protein L29 [Source:HGNC Symbol;Acc:HGNC:10331]	-
ENSG00000272106	21.4133	19.5794	19.2676	15.9849	86.9579	96.5275	88.1189	106.576	19.0613	94.545	-2.30991	4.3142e-19	6.53193e-18	AL691432.2	1	1613758	1615795	-	2038	antisense	artifact	-
ENSG00000125835	5366.17	4049.52	4849.8	4153.56	8863.34	12684.8	10131.4	10760.7	4604.76	10610.1	-1.20414	4.43584e-19	6.71154e-18	SNRPB	20	2461634	2470853	-	1278	protein_coding	small nuclear ribonucleoprotein polypeptides B and B1 [Source:HGNC Symbol;Acc:HGNC:11153]	-
ENSG00000148143	420.557	457.987	382.943	453.467	194.065	149.419	189.971	174.188	428.738	176.911	1.27359	4.45292e-19	6.73282e-18	ZNF462	9	106863097	107013634	+	12259	protein_coding	zinc finger protein 462 [Source:HGNC Symbol;Acc:HGNC:21684]	-
ENSG00000106086	673.234	746.57	521.83	590.601	286.325	247.269	211.714	202.838	633.059	237.036	1.41637	4.56075e-19	6.88652e-18	PLEKHA8	7	30027404	30130483	+	10886	protein_coding	pleckstrin homology domain containing A8 [Source:HGNC Symbol;Acc:HGNC:30037]	-
ENSG00000137563	505.354	611.217	457.604	514.883	1123.03	1330.23	1043.69	1133.37	522.264	1157.58	-1.14794	4.79967e-19	7.24237e-18	GGH	8	63015079	63039171	-	3130	protein_coding	gamma-glutamyl hydrolase [Source:HGNC Symbol;Acc:HGNC:4248]	-
ENSG00000198689	400.857	437.556	323.534	381.956	154.827	83.3045	113.296	138.663	385.976	122.523	1.64897	4.91493e-19	7.41128e-18	SLC9A6	X	135973841	136047269	+	7465	protein_coding	solute carrier family 9 member A6 [Source:HGNC Symbol;Acc:HGNC:11079]	-
ENSG00000204634	1257.39	1414.82	1284.5	1314.13	541.896	735.196	639.72	597.054	1317.71	628.466	1.06975	4.94466e-19	7.45107e-18	TBC1D8	2	101007617	101252866	-	6030	protein_coding	TBC1 domain family member 8 [Source:HGNC Symbol;Acc:HGNC:17791]	-
ENSG00000163898	69.379	79.1688	59.4083	79.0833	4.24185	3.96688	8.01081	3.43793	71.7599	4.91437	3.86277	5.03273e-19	7.57865e-18	LIPH	3	185506262	185552613	-	4122	protein_coding	lipase H [Source:HGNC Symbol;Acc:HGNC:18483]	-
ENSG00000214975	59.1007	63.8458	58.6055	59.7332	187.702	208.922	153.35	203.984	60.3213	188.489	-1.64269	5.09701e-19	7.67027e-18	PPIAP29	6	24976419	24976982	+	499	processed_pseudogene	peptidylprolyl isomerase A pseudogene 29 [Source:HGNC Symbol;Acc:HGNC:43021]	-
ENSG00000083097	172.163	171.958	162.971	159.849	41.358	52.8918	53.7869	53.8609	166.735	50.4744	1.72764	5.12544e-19	7.70785e-18	DOP1A	6	83067666	83171350	+	10045	protein_coding	DOP1 leucine zipper like protein A [Source:HGNC Symbol;Acc:HGNC:21194]	-
ENSG00000196154	613.277	555.033	541.9	630.984	1129.39	1335.52	1088.33	1225.05	585.298	1194.57	-1.02878	5.20232e-19	7.81293e-18	S100A4	1	153543613	153550136	-	1025	protein_coding	S100 calcium binding protein A4 [Source:HGNC Symbol;Acc:HGNC:10494]	-
ENSG00000134825	876.232	921.933	692.829	914.506	1805.97	2279.64	1740.63	1867.94	851.375	1923.54	-1.17568	5.35731e-19	8.04029e-18	TMEM258	11	61768501	61792802	-	3068	protein_coding	transmembrane protein 258 [Source:HGNC Symbol;Acc:HGNC:1164]	-
ENSG00000166881	1028.69	1167.95	873.463	942.269	493.115	473.381	429.15	422.865	1003.09	454.628	1.14152	5.49897e-19	8.2418e-18	NEMP1	12	57055643	57088063	-	5708	protein_coding	nuclear envelope integral membrane protein 1 [Source:HGNC Symbol;Acc:HGNC:29001]	-
ENSG00000070759	178.159	143.866	161.366	162.373	40.2976	54.2141	44.6316	46.9851	161.441	46.5321	1.80094	5.54449e-19	8.30445e-18	TESK2	1	45343883	45491166	-	3322	protein_coding	testis associated actin remodelling kinase 2 [Source:HGNC Symbol;Acc:HGNC:11732]	-
ENSG00000089177	307.495	387.331	352.436	314.651	132.558	142.808	124.74	138.663	340.478	134.692	1.33924	5.55157e-19	8.30947e-18	KIF16B	20	16272104	16573434	-	7721	protein_coding	kinesin family member 16B [Source:HGNC Symbol;Acc:HGNC:15869]	-
ENSG00000167700	712.634	486.93	659.914	626.777	1272.55	2134.18	1774.97	1631.87	621.564	1703.39	-1.45383	5.61499e-19	8.39875e-18	MFSD3	8	144509074	144511213	+	1823	protein_coding	major facilitator superfamily domain containing 3 [Source:HGNC Symbol;Acc:HGNC:25157]	-
ENSG00000116016	2285.23	2435.5	1961.28	2160.49	925.783	1227.09	1028.82	1016.48	2210.62	1049.54	1.07557	5.77342e-19	8.62995e-18	EPAS1	2	46293667	46386703	+	7302	protein_coding	endothelial PAS domain protein 1 [Source:HGNC Symbol;Acc:HGNC:3374]	Others
ENSG00000111817	1305.35	1528.04	1166.49	1219.06	646.882	439.002	535.58	566.113	1304.74	546.894	1.25267	5.91638e-19	8.83772e-18	DSE	6	116254173	116444860	+	19193	protein_coding	dermatan sulfate epimerase [Source:HGNC Symbol;Acc:HGNC:21144]	-
ENSG00000172409	199.572	180.471	207.126	177.517	411.459	437.679	603.099	523.711	191.171	493.987	-1.36955	5.99766e-19	8.95313e-18	CLP1	11	57648992	57661868	+	2793	protein_coding	cleavage and polyadenylation factor I subunit 1 [Source:HGNC Symbol;Acc:HGNC:16999]	-
ENSG00000158773	1063.81	1018.13	860.618	1104.64	389.19	330.574	460.049	485.894	1011.8	416.427	1.27941	6.16665e-19	9.19924e-18	USF1	1	161039251	161045977	-	2336	protein_coding	upstream transcription factor 1 [Source:HGNC Symbol;Acc:HGNC:12593]	bHLH
ENSG00000184162	203.854	178.768	227.197	221.265	435.85	499.827	470.349	480.164	207.771	471.548	-1.18109	6.33359e-19	9.44197e-18	NR2C2AP	19	19201416	19203424	-	1794	protein_coding	nuclear receptor 2C2 associated protein [Source:HGNC Symbol;Acc:HGNC:30763]	-
ENSG00000155903	189.293	287.732	275.366	216.217	88.0184	60.8255	53.7869	56.1529	242.152	64.6959	1.8999	6.58821e-19	9.81498e-18	RASA2	3	141487047	141615342	+	5993	protein_coding	RAS p21 protein activator 2 [Source:HGNC Symbol;Acc:HGNC:9872]	-
ENSG00000068366	937.045	1076.01	714.505	869.917	409.338	355.697	296.4	283.056	899.37	336.123	1.41939	6.84852e-19	1.0196e-17	ACSL4	X	109624244	109733403	-	6415	protein_coding	acyl-CoA synthetase long chain family member 4 [Source:HGNC Symbol;Acc:HGNC:3571]	-
ENSG00000143774	3967.45	2942.01	3175.13	3410.68	6370.2	9900.02	8097.78	8061.95	3373.82	8107.49	-1.26476	6.93945e-19	1.03245e-17	GUK1	1	228139962	228148984	+	4725	protein_coding	guanylate kinase 1 [Source:HGNC Symbol;Acc:HGNC:4693]	-
ENSG00000076248	306.638	370.305	370.9	339.049	760.351	728.584	661.464	758.637	346.723	727.259	-1.06854	6.97884e-19	1.03761e-17	UNG	12	109097574	109110992	+	2567	protein_coding	uracil DNA glycosylase [Source:HGNC Symbol;Acc:HGNC:12572]	-
ENSG00000120137	1060.39	1285.43	809.237	1033.13	419.943	243.302	392.53	351.815	1047.05	351.897	1.57066	6.99062e-19	1.03867e-17	PANK3	5	168548495	168579600	-	10580	protein_coding	pantothenate kinase 3 [Source:HGNC Symbol;Acc:HGNC:19365]	-
ENSG00000176422	65.0964	47.6715	69.0421	79.9246	201.488	185.121	266.645	256.699	65.4337	227.488	-1.79807	7.05e-19	1.0468e-17	SPRYD4	12	56468567	56479707	+	10779	protein_coding	SPRY domain containing 4 [Source:HGNC Symbol;Acc:HGNC:27468]	-
ENSG00000281406	195.289	204.306	150.126	195.184	63.6277	51.5695	52.6425	51.569	186.227	54.8522	1.75938	7.19015e-19	1.0669e-17	BLACAT1	1	205434886	205437879	-	2994	lincRNA	bladder cancer associated transcript 1 [Source:HGNC Symbol;Acc:HGNC:48597]	-
ENSG00000186174	4298.93	4868.45	3547.64	4890.55	1243.92	698.171	1728.05	1370.59	4401.39	1260.18	1.80375	7.26614e-19	1.07746e-17	BCL9L	11	118893875	118925608	-	10470	protein_coding	B cell CLL/lymphoma 9 like [Source:HGNC Symbol;Acc:HGNC:23688]	-
ENSG00000119421	855.675	734.652	762.674	888.426	1499.49	1803.61	1568.97	1628.43	810.357	1625.13	-1.00353	7.37079e-19	1.09225e-17	NDUFA8	9	122144058	122159819	-	844	protein_coding	NADH:ubiquinone oxidoreductase subunit A8 [Source:HGNC Symbol;Acc:HGNC:7692]	-
ENSG00000235174	1785.01	1596.14	1188.17	1536.24	3317.13	5359.26	3777.67	3904.34	1526.39	4089.6	-1.42169	7.43041e-19	1.0999e-17	RPL39P3	6	73373108	73373263	-	156	processed_pseudogene	ribosomal protein L39 pseudogene 3 [Source:HGNC Symbol;Acc:HGNC:21383]	-
ENSG00000119844	753.748	756.785	586.858	645.286	269.357	125.618	225.447	232.633	685.669	213.264	1.68041	7.43226e-19	1.0999e-17	AFTPH	2	64524305	64593005	+	5767	protein_coding	aftiphilin [Source:HGNC Symbol;Acc:HGNC:25951]	-
ENSG00000077157	496.788	713.37	496.14	583.871	208.911	245.947	227.736	201.692	572.542	221.071	1.37428	7.50437e-19	1.1091e-17	PPP1R12B	1	202348699	202592706	+	21069	protein_coding	protein phosphatase 1 regulatory subunit 12B [Source:HGNC Symbol;Acc:HGNC:7619]	-
ENSG00000147804	160.171	106.41	148.521	163.215	339.348	464.125	463.482	393.07	144.579	415.006	-1.51993	7.64227e-19	1.12873e-17	SLC39A4	8	144409742	144416895	-	5033	protein_coding	solute carrier family 39 member 4 [Source:HGNC Symbol;Acc:HGNC:17129]	-
ENSG00000130731	1017.56	737.206	895.941	900.204	1766.73	2860.12	2216.71	2185.38	887.728	2257.23	-1.34589	7.72208e-19	1.13976e-17	METTL26	16	634427	636366	-	1830	protein_coding	methyltransferase like 26 [Source:HGNC Symbol;Acc:HGNC:14141]	-
ENSG00000110497	968.737	920.23	803.618	967.509	430.548	413.878	472.638	462.975	915.024	445.01	1.03925	7.73482e-19	1.14089e-17	AMBRA1	11	46396414	46594125	-	7673	protein_coding	autophagy and beclin 1 regulator 1 [Source:HGNC Symbol;Acc:HGNC:25990]	-
ENSG00000259630	0.856531	0	4.01407	1.68262	54.0836	89.916	62.9421	53.8609	1.63831	65.2006	-5.28276	7.75205e-19	1.14267e-17	AC104046.1	15	85415228	85415633	+	406	transcribed_processed_pseudogene	fatty acid binding protein 5 (psoriasis-associated) (FABP5) pseudogene	-
ENSG00000100625	489.936	582.273	385.351	460.198	197.246	170.576	192.259	168.459	479.44	182.135	1.39461	8.16586e-19	1.20287e-17	SIX4	14	60709528	60724348	-	6658	protein_coding	SIX homeobox 4 [Source:HGNC Symbol;Acc:HGNC:10890]	Homeobox
ENSG00000232472	173.019	145.568	146.915	131.245	369.041	501.149	376.508	355.253	149.187	400.488	-1.42295	8.39634e-19	1.23601e-17	EEF1B2P3	X	24788392	24789069	-	678	processed_pseudogene	eukaryotic translation elongation factor 1 beta 2 pseudogene 3 [Source:HGNC Symbol;Acc:HGNC:3210]	-
ENSG00000119333	1602.57	1451.43	1931.57	1715.44	3029.74	4483.9	4022.57	4235.53	1675.25	3942.94	-1.23459	8.43098e-19	1.24029e-17	WDR34	9	128633661	128656787	-	2604	protein_coding	WD repeat domain 34 [Source:HGNC Symbol;Acc:HGNC:28296]	-
ENSG00000070669	48.8223	74.0611	77.0702	58.0505	168.613	234.046	259.779	267.013	64.501	232.363	-1.84677	8.51308e-19	1.25154e-17	ASNS	7	97852118	97872542	-	4455	protein_coding	asparagine synthetase (glutamine-hydrolyzing) [Source:HGNC Symbol;Acc:HGNC:753]	-
ENSG00000119396	2425.7	2612.57	1679.49	2035.98	922.602	452.225	638.576	715.09	2188.43	682.123	1.6804	8.68476e-19	1.27594e-17	RAB14	9	121178137	121223014	-	4304	protein_coding	RAB14, member RAS oncogene family [Source:HGNC Symbol;Acc:HGNC:16524]	-
ENSG00000169926	2764.03	3107.16	2705.49	2888.22	1361.63	855.524	1356.12	1191.82	2866.22	1191.27	1.2657	8.96794e-19	1.31667e-17	KLF13	15	31326855	31435665	+	9409	protein_coding	Kruppel like factor 13 [Source:HGNC Symbol;Acc:HGNC:13672]	zf-C2H2
ENSG00000185669	143.041	131.948	113.197	158.167	19.0883	43.6357	22.888	16.0437	136.588	25.4139	2.44779	8.98783e-19	1.31873e-17	SNAI3	16	88677682	88686493	-	1732	protein_coding	snail family transcriptional repressor 3 [Source:HGNC Symbol;Acc:HGNC:18411]	zf-C2H2
ENSG00000171067	424.84	399.249	500.154	484.596	899.272	956.019	1156.99	1245.68	452.209	1064.49	-1.23493	9.16814e-19	1.3443e-17	C11orf24	11	68261335	68272001	-	3406	protein_coding	chromosome 11 open reading frame 24 [Source:HGNC Symbol;Acc:HGNC:1174]	-
ENSG00000083845	15416.7	13355.7	14677.1	16234	25809.5	42218.2	37248	38093.4	14920.9	35842.3	-1.2643	9.1874e-19	1.34624e-17	RPS5	19	58386400	58394806	+	3617	protein_coding	ribosomal protein S5 [Source:HGNC Symbol;Acc:HGNC:10426]	-
ENSG00000114770	2231.26	3142.91	2915.82	3071.63	1208.93	1318.33	1421.35	1237.66	2840.41	1296.56	1.13158	9.23146e-19	1.35181e-17	ABCC5	3	183919934	184018015	-	11441	protein_coding	ATP binding cassette subfamily C member 5 [Source:HGNC Symbol;Acc:HGNC:56]	-
ENSG00000008405	195.289	233.25	224.788	190.137	73.1719	74.0485	56.0757	72.1965	210.866	68.8731	1.61548	9.34498e-19	1.36753e-17	CRY1	12	106991364	107093829	-	5062	protein_coding	cryptochrome circadian regulator 1 [Source:HGNC Symbol;Acc:HGNC:2384]	-
ENSG00000169738	1558.03	1236.91	1225.9	1431.91	2506.93	3776.47	3195.17	3301.56	1363.19	3195.03	-1.22861	9.38475e-19	1.37245e-17	DCXR	17	82035136	82037732	-	1902	protein_coding	dicarbonyl and L-xylulose reductase [Source:HGNC Symbol;Acc:HGNC:18985]	-
ENSG00000166012	4093.36	4201.05	2584.26	3009.37	1487.83	1318.33	1217.64	1340.79	3472.01	1341.15	1.3721	9.53996e-19	1.39423e-17	TAF1D	11	93729948	93784391	-	8420	protein_coding	TATA-box binding protein associated factor, RNA polymerase I subunit D [Source:HGNC Symbol;Acc:HGNC:28759]	-
ENSG00000109390	220.985	195.794	162.169	185.089	482.51	517.017	395.963	552.361	191.009	486.963	-1.35045	9.71952e-19	1.41955e-17	NDUFC1	4	139266880	139302551	-	1941	protein_coding	NADH:ubiquinone oxidoreductase subunit C1 [Source:HGNC Symbol;Acc:HGNC:7705]	-
ENSG00000164741	190.15	207.712	109.183	177.517	28.6325	14.5452	44.6316	30.9414	171.14	29.6877	2.51606	9.76391e-19	1.4251e-17	DLC1	8	13083361	13604610	-	12794	protein_coding	DLC1 Rho GTPase activating protein [Source:HGNC Symbol;Acc:HGNC:2897]	-
ENSG00000133315	1051.82	812.97	967.392	1001.16	1846.26	3042.6	2352.89	2349.25	958.336	2397.75	-1.3226	9.77251e-19	1.42542e-17	MACROD1	11	63998558	64166106	-	2089	protein_coding	MACRO domain containing 1 [Source:HGNC Symbol;Acc:HGNC:29598]	-
ENSG00000102858	674.947	651.227	585.252	647.81	215.274	124.296	268.934	226.903	639.809	208.852	1.61139	1.0059e-18	1.46625e-17	MGRN1	16	4616493	4690974	+	10219	protein_coding	mahogunin ring finger 1 [Source:HGNC Symbol;Acc:HGNC:20254]	-
ENSG00000065491	328.908	303.055	275.366	312.127	103.925	59.5032	117.873	105.43	304.864	96.6829	1.64961	1.04294e-18	1.51925e-17	TBC1D22B	6	37257772	37332970	+	3462	protein_coding	TBC1 domain family member 22B [Source:HGNC Symbol;Acc:HGNC:21602]	-
ENSG00000272277	3.42613	4.25638	4.01407	10.9371	51.9626	76.6931	72.0973	63.0287	5.65841	65.9454	-3.54086	1.05369e-18	1.5339e-17	AL031963.3	6	3068045	3068894	-	850	antisense	novel transcript, antisense to RIPK1	-
ENSG00000093010	1934.9	1494.84	1782.25	1653.18	3055.19	4482.58	4215.97	4025.82	1716.29	3944.89	-1.20046	1.06261e-18	1.54588e-17	COMT	22	19941607	19969975	+	5195	protein_coding	catechol-O-methyltransferase [Source:HGNC Symbol;Acc:HGNC:2228]	-
ENSG00000116017	197.859	177.917	175.816	205.28	63.6277	35.7019	65.2309	44.6931	189.218	52.3134	1.84482	1.07099e-18	1.55705e-17	ARID3A	19	925781	975934	+	7210	protein_coding	AT-rich interaction domain 3A [Source:HGNC Symbol;Acc:HGNC:3031]	ARID
ENSG00000172809	4459.96	4326.19	4046.19	5923.68	10474.2	10365.5	9427.58	11034.6	4689	10325.5	-1.13887	1.08307e-18	1.5736e-17	RPL38	17	74203582	74210655	+	3829	protein_coding	ribosomal protein L38 [Source:HGNC Symbol;Acc:HGNC:10349]	-
ENSG00000123364	307.495	353.28	301.056	352.51	138.921	97.8498	135.039	123.766	328.585	123.894	1.40213	1.10739e-18	1.60788e-17	HOXC13	12	53938765	53946544	+	2423	protein_coding	homeobox C13 [Source:HGNC Symbol;Acc:HGNC:5125]	Homeobox
ENSG00000174886	265.525	204.306	230.408	238.091	482.51	792.054	600.811	648.623	234.583	631	-1.42609	1.11862e-18	1.62208e-17	NDUFA11	19	5891276	5904006	-	4839	protein_coding	NADH:ubiquinone oxidoreductase subunit A11 [Source:HGNC Symbol;Acc:HGNC:20371]	-
ENSG00000130779	904.497	1178.17	985.054	983.494	527.05	388.754	436.017	413.698	1012.8	441.38	1.19659	1.12386e-18	1.62861e-17	CLIP1	12	122271432	122422632	-	18559	protein_coding	CAP-Gly domain containing linker protein 1 [Source:HGNC Symbol;Acc:HGNC:10461]	-
ENSG00000177732	848.823	880.22	1004.32	1019.67	430.548	227.435	359.342	332.333	938.259	337.414	1.47247	1.12908e-18	1.63455e-17	SOX12	20	325595	330224	+	4630	protein_coding	SRY-box 12 [Source:HGNC Symbol;Acc:HGNC:11198]	HMG
ENSG00000261189	33.4047	40.8613	23.2816	29.4459	139.981	212.889	117.873	131.787	31.7484	150.633	-2.24496	1.14506e-18	1.6561e-17	AL031058.1	6	7540451	7541338	-	888	antisense	novel transcript, antisense to DSP	-
ENSG00000173156	2001.71	1659.99	1966.09	1951	3479.38	5319.59	4068.35	4475.04	1894.7	4335.59	-1.19397	1.20121e-18	1.73619e-17	RHOD	11	67056818	67072013	+	1265	protein_coding	ras homolog family member D [Source:HGNC Symbol;Acc:HGNC:670]	-
ENSG00000111652	664.668	573.761	639.843	552.742	1137.88	1523.28	1296.61	1258.28	607.754	1304.01	-1.10059	1.21866e-18	1.75968e-17	COPS7A	12	6723741	6731875	+	3113	protein_coding	COP9 signalosome subunit 7A [Source:HGNC Symbol;Acc:HGNC:16758]	-
ENSG00000237973	298.929	353.28	395.788	554.425	1038.19	1447.91	1039.12	1328.19	400.605	1213.35	-1.59817	1.21912e-18	1.75968e-17	MTCO1P12	1	631074	632616	+	1543	unprocessed_pseudogene	MT-CO1 pseudogene 12 [Source:HGNC Symbol;Acc:HGNC:52014]	-
ENSG00000169992	1128.05	1073.46	1088.62	1237.57	499.478	609.578	552.746	441.201	1131.92	525.751	1.10769	1.21983e-18	1.75968e-17	NLGN2	17	7404874	7419860	+	5550	protein_coding	neuroligin 2 [Source:HGNC Symbol;Acc:HGNC:14290]	-
ENSG00000174446	233.833	218.778	211.943	238.091	523.868	428.423	517.269	526.003	225.661	498.891	-1.14615	1.2256e-18	1.76687e-17	SNAPC5	15	66490135	66497813	-	2509	protein_coding	small nuclear RNA activating complex polypeptide 5 [Source:HGNC Symbol;Acc:HGNC:15484]	-
ENSG00000149809	334.047	301.352	345.21	358.399	687.179	1003.62	755.305	749.469	334.752	798.894	-1.25343	1.23567e-18	1.78023e-17	TM7SF2	11	65111845	65116384	+	3408	protein_coding	transmembrane 7 superfamily member 2 [Source:HGNC Symbol;Acc:HGNC:11863]	-
ENSG00000145592	9340.48	8889.89	7544.85	10603.1	18373.6	19654.6	17602	22055.5	9094.57	19421.4	-1.09458	1.24011e-18	1.78548e-17	RPL37	5	40825262	40835335	-	8153	protein_coding	ribosomal protein L37 [Source:HGNC Symbol;Acc:HGNC:10347]	-
ENSG00000159063	324.625	303.055	254.492	296.142	626.733	655.858	583.645	645.185	294.579	627.855	-1.09203	1.26657e-18	1.8224e-17	ALG8	11	78100936	78139660	-	3448	protein_coding	ALG8, alpha-1,3-glucosyltransferase [Source:HGNC Symbol;Acc:HGNC:23161]	-
ENSG00000067533	88.2227	93.6405	85.9012	89.1791	289.506	219.501	226.591	333.479	89.2359	267.269	-1.5846	1.28495e-18	1.84765e-17	RRP15	1	218285287	218337983	+	7883	protein_coding	ribosomal RNA processing 15 homolog [Source:HGNC Symbol;Acc:HGNC:24255]	-
ENSG00000184216	3095.5	2387.83	3032.23	2613.96	5074.31	5884.21	5941.73	5584.35	2782.38	5621.15	-1.01443	1.29263e-18	1.85749e-17	IRAK1	X	154010500	154019980	-	4001	protein_coding	interleukin 1 receptor associated kinase 1 [Source:HGNC Symbol;Acc:HGNC:6112]	-
ENSG00000156603	263.812	297.947	278.577	280.998	528.11	579.165	623.699	611.952	280.333	585.731	-1.0628	1.31756e-18	1.89209e-17	MED19	11	57703714	57712323	-	1877	protein_coding	mediator complex subunit 19 [Source:HGNC Symbol;Acc:HGNC:29600]	-
ENSG00000116120	1028.69	978.969	1111.9	858.138	2086.99	2241.29	1804.72	2045.57	994.425	2044.64	-1.0396	1.3341e-18	1.91462e-17	FARSB	2	222570536	222656337	-	3369	protein_coding	phenylalanyl-tRNA synthetase subunit beta [Source:HGNC Symbol;Acc:HGNC:17800]	-
ENSG00000012061	608.137	495.443	568.393	520.772	1044.56	1375.19	1131.81	1158.58	548.186	1177.53	-1.10219	1.36351e-18	1.95556e-17	ERCC1	19	45407333	45478828	-	5576	protein_coding	ERCC excision repair 1, endonuclease non-catalytic subunit [Source:HGNC Symbol;Acc:HGNC:3433]	-
ENSG00000116459	2186.72	1968.15	1836.84	1935.02	4147.47	4780.09	3443.5	4081.97	1981.68	4113.26	-1.05343	1.36932e-18	1.96184e-17	ATP5PB	1	111448864	111462773	+	3383	protein_coding	ATP synthase peripheral stalk-membrane subunit b [Source:HGNC Symbol;Acc:HGNC:840]	-
ENSG00000188372	304.069	208.563	262.52	291.935	541.896	827.756	828.546	754.053	266.772	738.063	-1.46734	1.36965e-18	1.96184e-17	ZP3	7	76397518	76442071	+	2716	protein_coding	zona pellucida glycoprotein 3 [Source:HGNC Symbol;Acc:HGNC:13189]	-
ENSG00000196083	662.099	755.934	534.675	600.697	303.292	220.823	242.613	240.655	638.351	251.846	1.33924	1.3769e-18	1.97096e-17	IL1RAP	3	190514051	190659750	+	11558	protein_coding	interleukin 1 receptor accessory protein [Source:HGNC Symbol;Acc:HGNC:5995]	-
ENSG00000157538	692.934	744.016	655.9	673.891	355.255	285.616	328.443	347.231	691.685	329.136	1.06921	1.40766e-18	2.0137e-17	VPS26C	21	37223420	37267919	-	9301	protein_coding	VPS26 endosomal protein sorting factor C [Source:HGNC Symbol;Acc:HGNC:3044]	-
ENSG00000158813	131.906	109.815	100.352	111.053	27.572	25.1236	19.4548	25.2115	113.281	24.3405	2.21679	1.41537e-18	2.02343e-17	EDA	X	69616067	70039469	+	6999	protein_coding	ectodysplasin A [Source:HGNC Symbol;Acc:HGNC:3157]	-
ENSG00000112039	603.855	587.381	539.492	560.314	259.813	284.293	267.79	293.37	572.76	276.317	1.05232	1.45619e-18	2.07947e-17	FANCE	6	35452356	35467103	+	2692	protein_coding	FA complementation group E [Source:HGNC Symbol;Acc:HGNC:3586]	-
ENSG00000154518	3199.14	3079.92	2496.75	3188.57	5430.63	7113.94	6108.81	6520.61	2991.1	6293.5	-1.07311	1.45643e-18	2.07947e-17	ATP5MC3	2	175176258	175184607	-	6780	protein_coding	ATP synthase membrane subunit c locus 3 [Source:HGNC Symbol;Acc:HGNC:843]	-
ENSG00000133101	14.561	4.25638	4.01407	7.57181	63.6277	83.3045	65.2309	82.5103	7.60083	73.6684	-3.28222	1.48674e-18	2.12139e-17	CCNA1	13	36431520	36442882	+	2400	protein_coding	cyclin A1 [Source:HGNC Symbol;Acc:HGNC:1577]	-
ENSG00000259884	71.9486	154.932	85.0984	113.577	1.06046	0	2.2888	2.29195	106.389	1.4103	6.19867	1.50101e-18	2.14038e-17	AC025259.3	12	52058459	52059503	-	915	lincRNA	novel transcript	-
ENSG00000100316	30567.9	27895.5	30424.3	31163	51425	75690.8	62138.7	62533.7	30012.7	62947	-1.06854	1.52721e-18	2.17635e-17	RPL3	22	39312882	39320389	-	4787	protein_coding	ribosomal protein L3 [Source:HGNC Symbol;Acc:HGNC:10332]	-
ENSG00000107485	306.638	307.311	225.591	381.114	94.3811	75.3708	109.863	93.9701	305.164	93.3961	1.70456	1.54984e-18	2.20718e-17	GATA3	10	8045378	8075203	+	3436	protein_coding	GATA binding protein 3 [Source:HGNC Symbol;Acc:HGNC:4172]	zf-GATA
ENSG00000004779	624.411	520.982	547.52	604.903	1275.74	1376.51	1020.81	1289.22	574.454	1240.57	-1.1105	1.60634e-18	2.28519e-17	NDUFAB1	16	23581002	23596356	-	1600	protein_coding	NADH:ubiquinone oxidoreductase subunit AB1 [Source:HGNC Symbol;Acc:HGNC:7694]	-
ENSG00000070018	247.538	360.941	241.647	272.585	94.3811	34.3796	70.9529	64.1747	280.678	65.9721	2.0782	1.60666e-18	2.28519e-17	LRP6	12	12116025	12267012	-	10337	protein_coding	LDL receptor related protein 6 [Source:HGNC Symbol;Acc:HGNC:6698]	-
ENSG00000132326	606.424	831.698	565.182	767.277	186.641	132.229	281.523	220.028	692.645	205.105	1.75329	1.62744e-18	2.31326e-17	PER2	2	238244038	238290102	-	6877	protein_coding	period circadian regulator 2 [Source:HGNC Symbol;Acc:HGNC:8846]	-
ENSG00000198431	2019.7	2111.17	1760.57	1840.79	790.044	454.869	858.301	717.382	1933.06	705.149	1.45347	1.77e-18	2.51431e-17	TXNRD1	12	104215779	104350305	+	6708	protein_coding	thioredoxin reductase 1 [Source:HGNC Symbol;Acc:HGNC:12437]	-
ENSG00000106400	1103.21	859.79	1091.83	954.048	2012.76	2858.8	2094.25	2296.54	1002.22	2315.59	-1.20766	1.83238e-18	2.60126e-17	ZNHIT1	7	101217668	101224190	+	5510	protein_coding	zinc finger HIT-type containing 1 [Source:HGNC Symbol;Acc:HGNC:21688]	-
ENSG00000099337	1307.07	1222.43	1026.8	1260.29	441.152	263.137	520.703	446.931	1204.15	417.981	1.52443	1.84737e-18	2.62086e-17	KCNK6	19	38319844	38332076	+	6169	protein_coding	potassium two pore domain channel subfamily K member 6 [Source:HGNC Symbol;Acc:HGNC:6281]	-
ENSG00000272405	333.191	303.055	255.295	278.474	123.014	79.3376	106.429	91.6782	292.504	100.115	1.54059	1.85244e-18	2.62639e-17	AL365181.3	1	156641666	156644887	-	3222	antisense	novel transcript, antisense to BCAN	-
ENSG00000117691	530.193	398.398	472.055	509.835	1075.31	1607.91	1004.78	1387.78	477.62	1268.95	-1.40901	1.87103e-18	2.65106e-17	NENF	1	212432887	212446379	+	1297	protein_coding	neudesin neurotrophic factor [Source:HGNC Symbol;Acc:HGNC:30384]	-
ENSG00000174579	509.636	535.453	317.112	496.374	159.069	84.6268	144.195	142.101	464.644	132.498	1.80495	1.94837e-18	2.75889e-17	MSL2	3	136148922	136197241	-	5095	protein_coding	MSL complex subunit 2 [Source:HGNC Symbol;Acc:HGNC:25544]	-
ENSG00000179526	505.354	406.91	541.097	543.488	953.355	1389.73	1208.49	1238.8	499.212	1197.59	-1.26154	1.97374e-18	2.79305e-17	SHARPIN	8	144098633	144108124	-	2783	protein_coding	SHANK associated RH domain interactor [Source:HGNC Symbol;Acc:HGNC:25321]	-
ENSG00000101439	8861.67	7021.33	7841.09	9198.91	15295	25487.2	20634.7	19965.2	8230.75	20345.5	-1.30557	1.97991e-18	2.8e-17	CST3	20	23626706	23638473	-	3695	protein_coding	cystatin C [Source:HGNC Symbol;Acc:HGNC:2475]	-
ENSG00000106399	527.623	564.397	538.689	559.473	1215.29	1269.4	940.698	1150.56	547.545	1143.99	-1.06272	2.03555e-18	2.87686e-17	RPA3	7	7636518	7718607	-	3232	protein_coding	replication protein A3 [Source:HGNC Symbol;Acc:HGNC:10291]	-
ENSG00000256628	5.99572	9.36405	11.2394	9.25443	89.0788	62.1478	77.8193	57.2988	8.9634	71.5862	-2.9967	2.11416e-18	2.98607e-17	ZBTB11-AS1	3	101676475	101679217	+	2743	antisense	ZBTB11 antisense RNA 1 [Source:HGNC Symbol;Acc:HGNC:48573]	-
ENSG00000008513	411.992	483.525	436.731	400.465	162.251	89.916	179.671	140.955	433.178	143.198	1.59149	2.1334e-18	3.01134e-17	ST3GAL1	8	133454848	133571940	-	8852	protein_coding	ST3 beta-galactoside alpha-2,3-sialyltransferase 1 [Source:HGNC Symbol;Acc:HGNC:10862]	-
ENSG00000132613	902.784	845.318	655.097	863.186	330.864	351.73	398.252	344.939	816.596	356.446	1.19589	2.14668e-18	3.02816e-17	MTSS1L	16	70661204	70686066	-	4999	protein_coding	MTSS1L, I-BAR domain containing [Source:HGNC Symbol;Acc:HGNC:25094]	-
ENSG00000197976	1173.45	999.399	972.209	922.919	408.278	420.49	543.591	436.617	1016.99	452.244	1.16887	2.15573e-18	3.039e-17	AKAP17A	X	1591593	1602514	+	4075	protein_coding	A-kinase anchoring protein 17A [Source:HGNC Symbol;Acc:HGNC:18783]	-
ENSG00000109101	354.604	446.92	427.9	463.563	181.339	162.642	116.729	166.167	423.247	156.719	1.43284	2.15977e-18	3.04277e-17	FOXN1	17	28506243	28538896	+	3637	protein_coding	forkhead box N1 [Source:HGNC Symbol;Acc:HGNC:12765]	Fork
ENSG00000136802	11397.9	10469.9	7379.47	10821.8	3940.68	3386.4	4851.12	3952.47	10017.2	4032.67	1.31255	2.17861e-18	3.06544e-17	LRRC8A	9	128882112	128918039	+	5230	protein_coding	leucine rich repeat containing 8 VRAC subunit A [Source:HGNC Symbol;Acc:HGNC:19027]	-
ENSG00000148429	250.964	304.757	289.013	290.253	101.804	67.437	93.8409	119.182	283.747	95.566	1.56421	2.24602e-18	3.1583e-17	USP6NL	10	11453946	11611754	-	14202	protein_coding	USP6 N-terminal like [Source:HGNC Symbol;Acc:HGNC:16858]	-
ENSG00000118181	8803.43	8221.63	6791.01	8047.99	17785	21156.7	14409.2	17263	7966.02	17653.5	-1.148	2.28404e-18	3.20974e-17	RPS25	11	119015712	119018691	-	1477	protein_coding	ribosomal protein S25 [Source:HGNC Symbol;Acc:HGNC:10413]	-
ENSG00000164118	226.124	192.389	169.394	175.834	50.9022	66.1147	64.0865	45.8391	190.935	56.7356	1.75532	2.3592e-18	3.31328e-17	CEP44	4	174283677	174333380	+	7132	protein_coding	centrosomal protein 44 [Source:HGNC Symbol;Acc:HGNC:29356]	-
ENSG00000169020	184.154	220.481	187.056	270.061	519.626	568.586	496.67	656.645	215.438	560.382	-1.3791	2.3812e-18	3.34207e-17	ATP5ME	4	672436	674338	-	940	protein_coding	ATP synthase membrane subunit e [Source:HGNC Symbol;Acc:HGNC:846]	-
ENSG00000155508	895.932	884.477	693.632	789.992	359.497	198.344	321.577	296.808	816.008	294.056	1.46911	2.4023e-18	3.36956e-17	CNOT8	5	154857553	154876793	+	3930	protein_coding	CCR4-NOT transcription complex subunit 8 [Source:HGNC Symbol;Acc:HGNC:9207]	-
ENSG00000111885	354.604	421.382	325.14	344.938	134.679	167.931	130.462	122.62	361.516	138.923	1.38321	2.4047e-18	3.37082e-17	MAN1A1	6	119177209	119349761	-	5014	protein_coding	mannosidase alpha class 1A member 1 [Source:HGNC Symbol;Acc:HGNC:6821]	-
ENSG00000110944	26.5525	22.9845	19.2676	11.7784	96.5021	115.04	90.4077	110.014	20.1457	102.991	-2.35397	2.51543e-18	3.52161e-17	IL23A	12	56334174	56340410	+	1187	protein_coding	interleukin 23 subunit alpha [Source:HGNC Symbol;Acc:HGNC:15488]	-
ENSG00000156273	543.897	622.283	367.689	496.374	163.311	68.7593	161.361	116.89	507.561	127.58	1.98647	2.5407e-18	3.55474e-17	BACH1	21	29194071	29630751	+	7717	protein_coding	BTB domain and CNC homolog 1 [Source:HGNC Symbol;Acc:HGNC:935]	TF_bZIP
ENSG00000101871	749.465	795.093	583.646	754.657	320.26	347.763	299.833	283.056	720.715	312.728	1.20527	2.62001e-18	3.66342e-17	MID1	X	10445310	10833654	-	9295	protein_coding	midline 1 [Source:HGNC Symbol;Acc:HGNC:7095]	-
ENSG00000156411	1004.71	905.759	769.097	921.237	2168.65	2447.57	1659.38	1998.58	900.201	2068.54	-1.20018	2.6561e-18	3.71155e-17	ATP5MPL	14	103912288	103928269	-	3415	protein_coding	ATP synthase membrane subunit 6.8PL [Source:HGNC Symbol;Acc:HGNC:1188]	-
ENSG00000164587	17000.4	16020.2	15743.2	18909.3	28702.5	37840.1	33244.9	37062	16918.3	34212.4	-1.01591	2.69248e-18	3.76003e-17	RPS14	5	150442635	150449756	-	5099	protein_coding	ribosomal protein S14 [Source:HGNC Symbol;Acc:HGNC:10387]	-
ENSG00000072818	128.48	108.112	125.239	180.041	356.315	544.785	369.642	426.303	135.468	424.261	-1.64534	2.76777e-18	3.86034e-17	ACAP1	17	7336529	7351478	+	7421	protein_coding	ArfGAP with coiled-coil, ankyrin repeat and PH domains 1 [Source:HGNC Symbol;Acc:HGNC:16467]	-
ENSG00000168003	11000.4	11509.3	13577.2	11907.1	20587.8	27387.4	24089.6	24630.5	11998.5	24173.8	-1.01053	2.78274e-18	3.87879e-17	SLC3A2	11	62856102	62888875	+	5178	protein_coding	solute carrier family 3 member 2 [Source:HGNC Symbol;Acc:HGNC:11026]	-
ENSG00000159658	1517.77	1755.33	1162.48	1345.26	677.635	547.43	620.265	618.828	1445.21	616.04	1.22921	2.82373e-18	3.93347e-17	EFCAB14	1	46675159	46719064	-	6285	protein_coding	EF-hand calcium binding domain 14 [Source:HGNC Symbol;Acc:HGNC:29051]	-
ENSG00000170892	906.21	796.795	954.547	844.677	1710.53	2233.35	1691.42	1773.97	875.557	1852.32	-1.08038	2.88083e-18	4.01051e-17	TSEN34	19	54189938	54194536	+	3542	protein_coding	tRNA splicing endonuclease subunit 34 [Source:HGNC Symbol;Acc:HGNC:15506]	-
ENSG00000108256	2834.26	3258.69	1885.01	2387.64	980.927	781.476	1116.94	950.015	2591.4	957.338	1.43606	2.9452e-18	4.09756e-17	NUFIP2	17	29255836	29294118	-	10850	protein_coding	NUFIP2, FMR1 interacting protein 2 [Source:HGNC Symbol;Acc:HGNC:17634]	-
ENSG00000072506	1357.6	1041.11	1320.63	1371.34	2303.32	3324.25	2993.75	3118.2	1272.67	2934.88	-1.20513	3.07551e-18	4.27619e-17	HSD17B10	X	53431258	53434373	-	1115	protein_coding	hydroxysteroid 17-beta dehydrogenase 10 [Source:HGNC Symbol;Acc:HGNC:4800]	-
ENSG00000115275	1275.38	1173.06	1236.33	1151.76	581.133	487.927	661.464	616.536	1209.13	586.765	1.04191	3.12921e-18	4.3476e-17	MOGS	2	74461057	74465410	-	3584	protein_coding	mannosyl-oligosaccharide glucosidase [Source:HGNC Symbol;Acc:HGNC:24862]	-
ENSG00000124688	290.364	266.45	266.535	280.998	514.324	602.966	567.623	618.828	276.087	575.935	-1.06015	3.13077e-18	4.3476e-17	MAD2L1BP	6	43629540	43640952	+	1880	protein_coding	MAD2L1 binding protein [Source:HGNC Symbol;Acc:HGNC:21059]	-
ENSG00000134109	770.022	810.416	554.745	704.178	328.743	243.302	286.1	269.305	709.84	281.863	1.33019	3.14771e-18	4.3684e-17	EDEM1	3	5187646	5219957	+	6758	protein_coding	ER degradation enhancing alpha-mannosidase like protein 1 [Source:HGNC Symbol;Acc:HGNC:18967]	-
ENSG00000130396	1235.12	1244.57	1046.07	1155.96	632.035	583.132	531.002	481.31	1170.43	556.87	1.07135	3.1885e-18	4.42226e-17	AFDN	6	167826922	167972023	+	13720	protein_coding	afadin, adherens junction formation factor [Source:HGNC Symbol;Acc:HGNC:7137]	-
ENSG00000276603	13.7045	12.7692	6.42252	15.9849	69.9905	95.2052	109.863	68.7586	12.2203	85.9542	-2.81715	3.19799e-18	4.43267e-17	AL109614.1	20	37526642	37527060	-	419	sense_intronic	novel transcript, sense intronic to BLCAP	-
ENSG00000185019	565.311	477.566	488.914	477.865	190.883	116.362	223.158	174.188	502.414	176.148	1.50771	3.23564e-18	4.48207e-17	UBOX5	20	3107573	3160196	-	4738	protein_coding	U-box domain containing 5 [Source:HGNC Symbol;Acc:HGNC:17777]	-
ENSG00000146872	446.253	404.357	409.436	426.545	203.609	121.651	162.505	161.583	421.648	162.337	1.37153	3.24026e-18	4.48567e-17	TLK2	17	62458658	62615481	+	8563	protein_coding	tousled like kinase 2 [Source:HGNC Symbol;Acc:HGNC:11842]	-
ENSG00000179091	4498.5	3551.53	4051	4039.98	6894.06	10053.4	9374.93	9489.83	4035.25	8953.06	-1.14962	3.25393e-18	4.50181e-17	CYC1	8	144095027	144097525	+	1975	protein_coding	cytochrome c1 [Source:HGNC Symbol;Acc:HGNC:2579]	-
ENSG00000175938	278.373	261.342	223.985	311.285	72.1114	99.1721	97.2741	98.554	268.746	91.7779	1.55331	3.28374e-18	4.54023e-17	ORAI3	16	30949066	30956461	+	2643	protein_coding	ORAI calcium release-activated calcium modulator 3 [Source:HGNC Symbol;Acc:HGNC:28185]	-
ENSG00000111424	1167.45	1250.53	1154.45	1187.93	493.115	247.269	466.916	456.099	1190.09	415.85	1.51443	3.31687e-18	4.5832e-17	VDR	12	47841537	47943048	-	5674	protein_coding	vitamin D receptor [Source:HGNC Symbol;Acc:HGNC:12679]	THR-like
ENSG00000167754	3190.58	2923.29	3045.08	3381.23	5225.96	7814.76	7173.11	7377.8	3135.04	6897.91	-1.13754	3.33617e-18	4.60702e-17	KLK5	19	50943303	50953093	-	1653	protein_coding	kallikrein related peptidase 5 [Source:HGNC Symbol;Acc:HGNC:6366]	-
ENSG00000113916	689.508	913.42	659.914	839.629	246.027	338.507	346.754	262.429	775.618	298.429	1.37965	3.34627e-18	4.61811e-17	BCL6	3	187721377	187745727	-	5938	protein_coding	B cell CLL/lymphoma 6 [Source:HGNC Symbol;Acc:HGNC:1001]	ZBTB
ENSG00000166562	355.461	314.972	275.366	228.837	750.807	905.771	629.421	789.578	293.659	768.894	-1.38829	3.47228e-18	4.78904e-17	SEC11C	18	59139477	59158836	+	4511	protein_coding	SEC11 homolog C, signal peptidase complex subunit [Source:HGNC Symbol;Acc:HGNC:23400]	-
ENSG00000168785	382.013	485.228	410.238	506.47	176.037	199.666	175.093	139.809	445.987	172.651	1.37106	3.50196e-18	4.82699e-17	TSPAN5	4	98470367	98658629	-	7430	protein_coding	tetraspanin 5 [Source:HGNC Symbol;Acc:HGNC:17753]	-
ENSG00000260475	3.42613	2.55383	3.21126	1.68262	47.7208	105.784	50.3537	49.277	2.71846	63.2837	-4.53291	3.56215e-18	4.90692e-17	AL353719.1	10	99621055	99621918	+	864	lincRNA	novel transcript	-
ENSG00000103264	846.253	818.077	758.66	861.504	307.534	202.311	384.519	325.457	821.123	304.955	1.42637	3.59726e-18	4.95223e-17	FBXO31	16	87326987	87392142	-	6897	protein_coding	F-box protein 31 [Source:HGNC Symbol;Acc:HGNC:16510]	-
ENSG00000141905	1262.53	1186.68	1181.74	1151.76	541.896	322.64	531.002	515.69	1195.68	477.807	1.32108	3.62206e-18	4.9833e-17	NFIC	19	3314403	3469217	+	9801	protein_coding	nuclear factor I C [Source:HGNC Symbol;Acc:HGNC:7786]	CTF/NFI
ENSG00000130005	144.754	139.609	164.577	168.262	335.106	535.529	390.241	421.72	154.301	420.649	-1.44428	3.87792e-18	5.33203e-17	GAMT	19	1397026	1401570	-	2403	protein_coding	guanidinoacetate N-methyltransferase [Source:HGNC Symbol;Acc:HGNC:4136]	-
ENSG00000145685	333.191	346.47	293.83	248.187	111.349	51.5695	99.5629	87.0942	305.419	87.3938	1.79674	3.97188e-18	5.45784e-17	LHFPL2	5	78485215	78770021	-	7977	protein_coding	LHFPL tetraspan subfamily member 2 [Source:HGNC Symbol;Acc:HGNC:6588]	-
ENSG00000080546	109.636	114.071	98.7462	91.703	22.2697	6.61147	13.7328	24.0655	103.539	16.6699	2.61128	4.01606e-18	5.51515e-17	SESN1	6	108986437	109094819	-	5121	protein_coding	sestrin 1 [Source:HGNC Symbol;Acc:HGNC:21595]	-
ENSG00000267073	25.6959	8.51277	22.4788	10.0957	90.1393	132.229	104.141	107.722	16.6958	108.558	-2.69654	4.11449e-18	5.64686e-17	AC005256.1	19	1748056	1748745	+	458	lincRNA	novel transcript	-
ENSG00000128422	55387.6	46580.2	46519.9	57396	90425.6	136630	119120	117825	51470.9	116000	-1.17229	4.15777e-18	5.70274e-17	KRT17	17	41619441	41624842	-	3130	protein_coding	keratin 17 [Source:HGNC Symbol;Acc:HGNC:6427]	-
ENSG00000176142	743.469	667.401	684.801	602.379	345.711	290.905	298.689	330.041	674.513	316.336	1.09084	4.18087e-18	5.73091e-17	TMEM39A	3	119429500	119468830	-	5333	protein_coding	transmembrane protein 39A [Source:HGNC Symbol;Acc:HGNC:25600]	-
ENSG00000151135	445.396	392.439	319.52	310.444	154.827	87.2714	109.863	108.868	366.95	115.207	1.6654	4.18714e-18	5.73597e-17	TMEM263	12	106955719	106978778	+	4768	protein_coding	transmembrane protein 263 [Source:HGNC Symbol;Acc:HGNC:28281]	-
ENSG00000169967	689.508	1063.24	654.294	752.974	340.408	269.748	264.357	267.013	790.005	285.381	1.46769	4.31356e-18	5.90552e-17	MAP3K2	2	127298730	127388465	-	11508	protein_coding	mitogen-activated protein kinase kinase kinase 2 [Source:HGNC Symbol;Acc:HGNC:6854]	-
ENSG00000166595	1231.69	921.933	997.096	1204.76	2011.7	2833.68	2552.01	2651.79	1088.87	2512.29	-1.20593	4.3212e-18	5.91236e-17	CIAO2B	16	66932055	66934423	-	1070	protein_coding	cytosolic iron-sulfur assembly component 2B [Source:HGNC Symbol;Acc:HGNC:24261]	-
ENSG00000101811	304.925	262.193	290.619	267.537	574.77	547.43	646.587	708.214	281.319	619.25	-1.13877	4.39608e-18	6.01111e-17	CSTF2	X	100820359	100840932	+	2187	protein_coding	cleavage stimulation factor subunit 2 [Source:HGNC Symbol;Acc:HGNC:2484]	-
ENSG00000203950	488.223	447.772	432.717	527.503	871.7	1153.04	1073.45	979.81	474.054	1019.5	-1.10408	4.47848e-18	6.12004e-17	RTL8A	X	135050932	135052196	-	1265	protein_coding	retrotransposon Gag like 8A [Source:HGNC Symbol;Acc:HGNC:24514]	-
ENSG00000011638	956.746	1015.57	827.702	1012.94	437.971	519.662	424.573	412.552	953.24	448.689	1.08845	4.55692e-18	6.22342e-17	TMEM159	16	21158377	21180616	+	2558	protein_coding	transmembrane protein 159 [Source:HGNC Symbol;Acc:HGNC:30136]	-
ENSG00000157881	769.165	709.114	606.928	733.624	255.571	267.103	351.331	324.311	704.708	299.579	1.23354	4.64882e-18	6.34504e-17	PANK4	1	2508533	2526628	-	5107	protein_coding	pantothenate kinase 4 [Source:HGNC Symbol;Acc:HGNC:19366]	-
ENSG00000237436	4.28266	1.70255	2.40844	1.68262	39.2371	108.428	50.3537	63.0287	2.51907	65.2619	-4.69153	4.86816e-18	6.64034e-17	CAMTA1-DT	1	6783892	6784843	-	415	antisense	CAMTA1 divergent transcript [Source:HGNC Symbol;Acc:HGNC:53020]	-
ENSG00000160305	799.144	858.087	789.167	900.204	383.887	442.969	425.717	339.209	836.65	397.946	1.0733	4.95006e-18	6.74794e-17	DIP2A	21	46458899	46569852	+	13557	protein_coding	disco interacting protein 2 homolog A [Source:HGNC Symbol;Acc:HGNC:17217]	-
ENSG00000142867	755.461	846.169	485.703	735.307	277.841	243.302	267.79	220.028	705.66	252.24	1.48317	4.9986e-18	6.80995e-17	BCL10	1	85265776	85276904	-	4618	protein_coding	B cell CLL/lymphoma 10 [Source:HGNC Symbol;Acc:HGNC:989]	-
ENSG00000140961	299.786	287.732	415.055	367.653	705.207	1057.84	962.441	858.337	342.557	895.955	-1.38577	5.34289e-18	7.27012e-17	OSGIN1	16	83948282	83966332	+	3460	protein_coding	oxidative stress induced growth inhibitor 1 [Source:HGNC Symbol;Acc:HGNC:30093]	-
ENSG00000172548	538.758	506.51	419.069	586.394	223.758	134.874	201.415	179.918	512.683	184.991	1.46618	5.44783e-18	7.40839e-17	NIPAL4	5	157460019	157474717	+	4208	protein_coding	NIPA like domain containing 4 [Source:HGNC Symbol;Acc:HGNC:28018]	-
ENSG00000127184	3135.76	2791.34	2231.02	3203.72	5810.27	7347.99	5743.75	6878.15	2840.46	6445.04	-1.18203	5.49491e-18	7.46785e-17	COX7C	5	86617904	86620962	+	1993	protein_coding	cytochrome c oxidase subunit 7C [Source:HGNC Symbol;Acc:HGNC:2292]	-
[truncated: 4,054 more rows]

## Sheet: VA-FA vs M
gene_id	VA_FA_1	VA_FA_2	VA_FA_3	VA_FA_4	Model_1	Model_2	Model_3	Model_4	group3	group2	log2FoldChange	pvalue	padj	gene_name	gene_chr	gene_start	gene_end	gene_strand	gene_length	gene_biotype	gene_description	tf_family
[truncated: 3,712 more rows]

[truncated: 1 more sheets: VA vs M]
