# Supplementary material for: Ferulic acid in synergy with retinol alleviates oxidative injury of HaCaT cells during UVB-induced photoaging
Source: Aging (Albany NY). 2024 Apr 18;16(8):7153–73. doi: 10.18632/aging.205749 (PMC11087097; doi:10.18632/aging.205749)
Supplement: Supplementary Table 7 [file aging-16-205749-s007.xlsx]

## Sheet: Sheet1
Supplementary Table 7. Gene expression of retinol synergistic ferulic acid in HaCaT cells at Venn plots.
DEGs of group1 vs group2	DEGs of group3 vs group2	Non-DEGs of group4 vs group 2	DEGs of group1 vs group2|DEGs of group3 vs group2	DEGs of group1 vs group2|Non-DEGs of group4 vs group 2	DEGs of group3 vs group2|Non-DEGs of group4 vs group 2	DEGs of group1 vs group2|DEGs of group3 vs group2|Non-DEGs of group4 vs group 2
RAPGEFL1	CCDC33	DBNL	SPRR2D	PIK3C2B	KRT5	IL6
AC015912.3	PTHLH	SPINT1	KDM7A-DT	EPB41	INPP1	CXCL1
CXCL3	TNFAIP2	LTBR	ODC1	HNRNPAB	MT-CYB	TXNIP
CTGF	AHNAK2	PPP1R18	FOSL1	CAVIN3	THBS1	C11orf68
H2AFX	SERPINB1	RMC1	RASSF5	IER5L	TRIM25	ZNHIT2
HEXIM1	KRT16	USP31	ID3	CHAC1	DSP	TNFRSF12A
SOX15	TINAGL1	PYGB	PRR9	PHF21A	AMBRA1	MYD88
ZNF516	SCNN1A	HSP90AA1	CCL20	LGR4	SPINDOC	MRPS24
ZMIZ1	PTGES	TAF1D	KRT6B	AKAP13	SREBF1	PPIF
C1orf122	PLAT	RNF149	DDIT4	NIP7	SPON2	FAM214B
JARID2	ACSL3	TGM1	BMF	SF3B4	MT-ND3	FBXO32
NCOA3	MAB21L4	CLCN6	CYP24A1	RAPGEF5	ACTB	SERTAD1
RAB11FIP4	OLMALINC	TRAFD1	MMP3	HECA	NRP2	CREB5
IRF7	KRT1	LDHA	MAN1B1-DT	MN1	CTSV	PTGS2
CCDC85B	LYPD3	2023-03-05	ELF3	SRGAP2	KRT17	CDK5RAP3
HEG1	FAM168B	DHCR7	PHLPP1	TIMM8B	F3	ARHGEF3
IBA57	INHBA	TMBIM1	AC126773.2	REV1	NAMPT	MAFB
CYP1B1	OAS1	OAT	NOP56	RRP9	MTATP6P1	AC004130.1
PI4KAP1	FDFT1	RAN	SPRR2A	MRPL57	LGALS9	CXXC5
EPHB3	KRT16P6	GABARAPL1	NXF1	TSSC4	TSC22D1	SUSD6
CYP1A1	IVL	CBX6	ATF5	EMSY	PSRC1	TUBB2A
ZNF703	BHLHE41	HSPH1	KLHL24	KHDC4	SIPA1	SLPI
ZNF609	PRSS22	CLINT1	EDAR	PPTC7	PDIA5	AC079305.1
DENND2C	ALDH1A1	PDLIM1	NOL4L	SEC24B	RGS3	MEPCE
SNAI1	KIRREL1	ABHD4	SH2D3C	INTS5	IFNGR2	TENT5B
NDUFAF8	TRIP10	HAPLN3	AL357060.1	C16orf91	NCDN	EGR3
VGF	ARHGEF37	NPC1	INSIG1	JMY	SH2D3A	MID1IP1
SMURF1	PROSER2	KIAA0100	GJB4	RICTOR	ADA	KLF9
TOM1L2	KRT6A	SLC37A2	AC005083.1	UBE2H	LOXL2	DNMBP
MT-RNR2	ARFGAP3	SQSTM1	B3GALT6	CCDC186	GJA1	PRSS8
KMT5C	HOXA-AS2	TP53BP2	SPRR2E	RNF38	CYTOR	RNF19B
FAM43A	LRG1	POLR1D	TBC1D10A	ARID4B	P2RY6	ARL8A
AC015712.2	GALNT12	VPS26C	LGI4	RSF1	SLC38A2	FSTL3
IGSF3	SPRR1A	SNAPC2	RUNX2	TMEM161B	CCNO	EIF5
MPDU1	STRA6	LPCAT4	TUBA4A	DHRS9	EFNB2	DUSP16
MT-RNR1	CDK7	PCSK9	DKK1	NCOA2	MHENCR	RTN4R
FAT2	MUC16	COL7A1	TSC22D3	TRMT6	HOXC13	RFFL
DYNLL1	APOBEC3B	CHST11	GOLPH3L	MAP3K5	RILPL2	STC2
RNF223	HMGB2	ERG28	B3GNT7	GNA13	IRX4	TMEM150A
AC087741.3	ADAM19	MDK	AC026250.1	FCHSD2	MYC	PTK2B
CHD2	KRT14	SRI	SAMD8	PHF13	DHRS3	RNF169
PGPEP1	UNC119B	HERC2	TUBB4B	CDYL	PPFIA3	EDN1
RASL11A	C1orf116	YPEL3	MTND2P28	ARL5B	ENC1	LYN
MT-ND1	FYB1	NECTIN2	RHOV	BICRAL	FASN	FAM110C
KIAA1671	LCN2	ABCC10	FST	KLF12	CSF1	NR4A3
GATAD2B	PITPNM3	CHTF8	PIGW	ATP8B1	KLF3	LGALS7B
GOLGA2	CKB	ZBED2	NT5DC2	ATF2	AP002387.1	DNAJB1
POLE4	EPB41L4A-AS1	IDI1	GAREM1	C18orf25	PTGS1	LINC02551
SPSB1	MMP1	RABGGTB	DTX2	AIMP2	HSD17B7	STK17B
MIR3648-1	DST	MAP3K6	MIR22HG	FRK	LIPE	NCOA7
ARRDC4	MEGF8	ECM1	DPH2	PNPLA3	ICAM1	TNK1
CBFA2T2	GOLGA2P10	SNHG7	HBP1	POLR2L	SLC25A28	PI4K2A
MED13L	SGK1	CDC25B	SMAD3	SEC24A	MEG3	AL162458.1
NDUFB2	MT-ND5	HIST3H2A	GAST	MRTO4	GJB5	TMCC1
AC073130.3	KRT9	UBTD1	LCMT2	PNO1	AC020916.1	MBIP
FOSL2	AGR2	RAB26	SFN	CDK17	CERK	CLDN6
UQCRQ	SRPX2	RIOK3	AP001453.2	SNRNP48	AREG	AMH
SLC25A29	KRT6C	SPATS2L	TEF	RAB30	ETV7	LINC01089
DTX4	COLCA2	C6orf48	TMEM185B	SPATA13	POLR2A	LRIG2
ZFC3H1	RIPK2	CAMLG	LIPG	LNX2	PRKCE	CSPG4P10
CISD3	CCDC80	CYP2S1	LINC02323	ARC	C6orf136	CASC8
MARK4	STK39	EFCAB14	TRMT61A	RALY-AS1	NOV	AC022613.2
DUS3L	LYPD1	RBM15	MT-ND2	EXOSC4	SHB	MVK
SPTLC2	FLG	TMEM41B	RASAL2-AS1	FOXK2	BNIP1	NFIL3
ZBTB43	GLIS2	XBP1	ACSS2	HCN3	SLURP2	IKZF2
CYTH3	MT-CO2	TBC1D8	FRMD4B	H1F0	MND1	MAP3K14
FOXK1	TRIM31	LINC01578	ITPRIP	PHF3	FAM3C	KCNK5
PLEKHG6	ABCA13	TERF2IP	AP000769.1	SEC24D	ADPRM	GCNT1
RHOB	S100A8	NEDD4L	HMGCS1	TMF1	LMTK3	PEX13
ATG14	LTBP3	CALB2	AL513304.1	LPAR3	SETD7	KIAA1958
ANKS1A	CDKN2D	SPTBN2	BHLHE40	WHAMM	TOX2	RAB12
FNDC3B	FMO3	TPRA1	MSMO1	NCK1	LINC01133	CARMN
H2AFZ	ALOX5	MVD	CSKMT	CEP170	ZXDB	AL645608.7
RBM8A	UBC	PRXL2A	CREBRF	ARHGAP5	ADGRF1	TIPARP
HBEGF	UBAP1	TMEM159	CPNE5	ARMC5	FOXD2-AS1	AL162377.1
HES6	C1orf74	TBC1D16	CITED2	MIER1	NIPAL4	RF00003
TTBK2	LPIN1	TUBG1	HMGCR	DENND4C	NKX2-8	TTK
NRARP	FOSB	C14orf119	MT-CO1	CAMK2A	DSC2	AL451042.2
KIAA0513	FUS	OXR1	RHPN2	ARID4A	YEATS4	TOB1-AS1
IL1RL1	DUSP7	SINHCAF	IL36G	LINP1	ZNF121	HIST1H2BD
MRPL51	KRT4	AC007318.1	UGCG	RSPRY1	STX1A	AP005264.1
SP1	MT-CO3	CRTC2	KDM6A	IGF2BP3	CIR1	MED18
KDM5B	SLC16A1	PARP16	PIM1	RAB8B	NR4A1	LINC00909
COPS9	BCL3	CREG2	PRDM1	SLC25A45	POLR1A	SH2B2
FAM219A	AJUBA	OSMR	IL22RA1	CENPC	ECHDC3	PGBD5
AC068831.7	KLK6	GPRC5C	IGFL1	PODXL2	SLC9A3-AS1	CNIH2
MICAL2	OLFM2	MPZL2	TCP11L2	FOXN2	RBPMS	MTF2
MAST4	CD70	SDCBP	RNASE7	ARNTL	SMIM3	IRF1
CBX4	CLK3	TMEM243	JMJD1C	RORA	AC008894.3	E2F5
SFPQ	C5orf56	LINC01503	NAV2	CDR2	GTPBP8	PPIAP29
CTIF	TRMT5	RCOR3	CXCL8	TFPI2	L1CAM	AL031963.3
SETD5	FAM107B	GATAD1	TNFSF10	TLE4	OVOL1-AS1	AL031058.1
FAU	USP3	CLMN	SPRR2F	SRM	PGLYRP3	AL109614.1
NECTIN1	SH3D21	C11orf95	FBXO34	PELI1	EXOC3L4	LHFPL2
NDUFB9	CYP26A1	PSKH1	TWNK	AFTPH	HOXA5	SESN1
NDE1	AL161431.1	ZNRF1	AEN	CRY1	SPOCD1	AC005256.1
VAV3	TRIB1	ACLY	TUBA1C	USP6NL	PADI3	BX255925.1
JAG1	OLFML2A	HNRNPM	HIST2H2BE	CEP44	USP43	IRAK2
JMJD7-PLA2G4B	PTPRE	ORMDL2	MICA	IL23A	SALL4	SH3RF1
PLEKHF2	CDKN2B	MIR205HG	TNFRSF1A	TMEM263	CYP4B1	AC084018.1
BCORL1	MXRA5	TLCD2	FJX1	AC241952.1	PCOLCE	TTC9
CMIP	GADD45G	SAT2	EFNA3	C14orf132	TBPL1	SNORD3A
ARHGEF10L	FOXN1	EIF2A	TRIM11	GPATCH4	EIF3J-DT	SMAD6
ANKRD33B	DGCR8	GAS5	EIF2AK3	ELF1	NABP1	CAMK1G
TNFRSF21	C1GALT1	SLC22A5	SEMA4B	FAM122A	NOL6	LEKR1
TAF7	GBP2	CAMK2G	YPEL2	UTP3	DUSP4	AL139393.2
THOC6	MICB	IDS	KRT42P	TRIM23	MAT2A	CEACAM6
RPL6	ALDOC	TTC39C	KCTD11	AL117332.1	AC100861.1	AC083841.1
APRT	MAPK15	SYF2	TTC9C	AC004057.1	AK6	SOX7
SLC10A3	MT-TN	UBE2B	FLRT3	LINC01002	HMCN1	TCTEX1D4
ZSWIM6	PTEN	MAFF	DDX28	LCOR	CALML5	AC080023.1
PRDX4	MT-ND6	SNHG18	ELOVL5	FOXJ1	ZNF227	RF00004
MTUS1	PLA2G4E	MET	SLC44A3-AS1	PBDC1	SLC35B3	IL17C
IRF2BPL	FAM72B	LCP1	AL451123.1	PLLP	SLC39A10	AL356356.1
TRERF1	SH2D5	LIMA1	S100A3	PRDM10	C8orf44	SH2B3
TSPAN14	TUBB6	EIF4A2	HABP4	ZNF8	TAF1A	AOC3
FTL	HOXA9	SLC11A2	TMEM88	AL354920.1	PCDH7	CFAP45
ZBTB4	CLEC2B	TNF	GPCPD1	AP003469.4	AC004233.2	UPK2
EBNA1BP2	NFKBIZ	MEX3C	NECTIN4	EXO5	AP002800.1	ZNF436-AS1
LMBR1L	C10orf99	LBR	AL365181.2	RBM47	FTH1P8	LRAT
SIPA1L3	SNAI2	RANBP9	AC093620.1	C6orf99	LINC01011	APOBEC3A
INCENP	SYTL2	ARFGEF2	MMP9	AC005076.1	IGFL1P1	CSF3
NAPB	MT-ATP6	EIF5AL1	PAX9	SLC2A3	PXYLP1	RNVU1-6
CXCL2	C14orf93	VAPB	STARD4	AC090970.2	KCP	AC117394.2
ERBB3	MIR210HG	IDH1	CHMP1B	SPOPL	KYNU	TNFAIP8
ULK1	ARPIN	C19orf25	SLC6A8	UBAC2-AS1	MEIS3	ANXA10
CYTH1	CLP1	SLC39A2	PADI1	CHAC2	LINC01588	MIR212
MICAL3	GPRC5B	ELK3	FAM49A	LYSMD3	MMP24	PLEKHA6
MBNL2	LGALS9C	H1FX	SLC20A1	MT-TV	SPRY4	C11orf91
ACTG1	PFKFB2	SWAP70	ACTN1-AS1	PHACTR2	ADAMTSL4-AS1	PTGER4
FZD8	AL365356.5	B4GALT4	SPRR1B	FUT8	POP1	SLC52A1
GLI3	RGCC	RAB9A	AP000692.2	SLC25A30	CIRBP-AS1	PER1
PPP1R14B	CYB561D1	TANC1	RAB3A	AL596244.1	TOLLIP-AS1	CTSW
RPL6P27	CEACAM5	RTKN	AC012485.3	AL157392.3	ZNF778	AL449106.1
ANKRD37	TMEM189	HOTAIRM1	LCE3E	CYB561D2	RTP4	GPBP1
MTHFR	SLC7A11	NR1D1	RAET1L	SLC11A1	BTBD19	AL136040.1
HERPUD1	MRM2	PTPRZ1	MAP3K8	PIK3R3	FTH1P23	SIRPB2
MNT	ZNF277	KLK13	RNF39	MAPK6	SLC35D1	AC073111.5
GTF2IRD1	DISP2	PSTPIP2	AC068580.3	C15orf62	SLC9A9	ABCA1
KIAA1217	MT-TC	PTP4A2	SNX32	IL20	ZNF750	PAGR1
UBL5	CLBA1	CAD	ELAC1	TOE1	ERVK3-1	S1PR5
NOP14-AS1	KLKP1	CENPW	CCSER2	AL391069.2	DQX1	AC092368.3
TP73	HMCN2	KATNBL1	GRAMD2B	EID2	TMC5	RPL7P19
TRIM28	LY6G6C	SLC12A6	DUSP6	MB21D2	ZNF304	EID3
MEGF9	CHST7	HPS3	NRG2	AC139100.2	ZNF37A	AP001273.1
TNFAIP8L1	KRT16P1	GCLM	RNA5-8SN2	JADE3	C2orf15	ZNF775
NEURL1B	THEM5	WDFY1	PHLDA3	AP005432.2	ADM2	AC090114.2
DAB2IP	SGTB	KYAT1	UBE2O	SASH1	NBPF20	MATR3
CYCS	ELFN2	CBX5	FXYD3	PDE5A	ABHD12B	UCN2
CRYBG2	RBM15B	CFH	FGD4	AGAP1-IT1	CRISPLD2	LINC00941
TMEM158	SCEL	HNRNPDL	TCTA	NAT1	CD86	DOK3
SERTAD2	CMTM8	ITGA6	UVRAG	AC010864.1	FLRT2	AL136131.2
SCAND1	AC102953.2	WASL	DAPK1	AC135983.2	RPS10P3	AC119427.1
LDLR	MIR4697HG	RNF13	AL139246.5	PIH1D2	LINC01138	FUT3
TMEM131L	NOTCH3	PPP1CC	GRB7	DYRK2	MIR17HG	MASP2
ACTL10	GALM	CMTM6	TNFRSF10D	CLK4	ANKHD1
POU2F1	RNF103-CHMP3	GAD1	EFNA5	GZMB	AC007325.2
S100A11	NMRAL2P	NOLC1	NEURL3	BLNK	LINC00346
CSNK1G1	TRIM6	TMEM39A	METTL1	AC083880.1	Z95331.1
MRTFB	AOC1	ZNF408	TIAM1	TP53I3	AL139385.1
GSTP1	ARHGAP18	HNRNPUL2	AC068580.1	SETMAR	MIR193BHG
RPS19	RIMS3	MST1R	NNAT	PPFIA4	SNHG14
C19orf70	ISCA2	SLC35D2	IBA57-DT	ZNF189	RFXAP
ATP1B1	NOS1	IRS1	WNT7B	F8A1	SH3TC2
SNHG8	TBC1D1	LETMD1	LNX1	AC107959.3	AC027796.4
WNT9A	KCNQ1OT1	OSBPL9	SPRR4	CHMP4BP1	SPNS2
RCOR1	HRK	DHRS1	HIST1H3B	FLI1	AC007255.1
CREBZF	PLPP3	FBN2	FERMT2	AL139274.2	RDH16
MALAT1	KRT3	IFRD2	IQCN	RNF224	PRKCG
LAGE3	IQANK1	NCF2	NCOA5	MIR31HG	AC005829.2
S100P	SIPA1L2	PFDN4	DCAKD	PPP1R27	AP000648.3
KANSL1	SSPN	TMEM167B	ZBTB18	FGF17	AC055811.4
GSDMB	AC245041.1	FNDC3A	PIK3IP1	PRC1	EEF1A1P13
OSBPL7	PRR15	MCM3AP	ZNF608	B3GNT2	AP003352.1
WEE1	CA12	BET1	HSF2	RPL24P2	MYL7
TLCD1	AC006449.5	EIF1B	AL512274.1	PLCB2	ACSM3
AL031714.1	LRRC4	PLCH2	TUBB2B	ZNF181	AC138969.1
YIF1A	RCAN1	TRPV6	NHLRC1		LSMEM1
SRGAP3	CCDC71	UPK3B	AP000812.3		GAS2L2
BTN3A1	CFAP157	DAPP1	LINC01127		PSAPL1
RUSC1-AS1	RPTN	ATXN10	HDAC9		AL022315.1
BTG2	SBSN	LIPA	SLC25A36		ULBP3
TAF9	USH1G	ZFAS1	MRGPRX3		AC010186.2
MAP3K9	RPUSD2	LYSMD4	ZNF165		ZFP42
ACBD3	AC064807.1	DDX56	AC022217.2		LRRC29
RREB1	ALOX15B	KPTN	ZBTB10		RPL13AP7
ATP5PF	DAPL1	THAP9-AS1	TPTEP2		AC135050.6
TINCR	KIAA1211L	TCEAL9	UBE2W		KLHL23
RNF168	DOCK8	BTG3	PGM2L1		AC008687.4
PJA2	HSPA1L	ADAMTSL5	AC084262.2		PKD1P1
BAZ2A	FTX	BTN2A1	NOC2LP1		AC016727.1
SDC3	LINC01444	MAD2L1BP	IL24		TEX22
PIKFYVE	VNN1	SBF1	AC092910.3		PGAM1P8
SNX30	TIFA	TONSL	AL137077.2		SUCLA2-AS1
MAML2	MYB	UHRF1BP1L	IKZF4
GJB3	TMEM177	ZFAND3	ZMYM5
ISG15	SLC6A20	PIR	DHPS
VANGL2	AC125807.2	CKMT1A	CSNK1G3
EMC6	CNNM1	SLMAP	AC092171.3
CMTM4	CASP14	ZCCHC3	LGALS7
AC015712.6	PINLYP	TJP3	OVOL2
MTMR4	SLC5A5	STARD3NL	AC008011.2
FAM83F	TLN2	PKP2	AC022217.1
AL691482.3	MMACHC	AUH	RYBP
CCDC71L	KRT77	CTDSP1	SERPINB10
PMAIP1	SLC9A3	UCA1	ZNF287
MIGA2	IGHE	APPL1	LIPH
PRELID1	EPPK1	PRKCH	TESK2
TCF7L2	RASSF10	PFAS	SNAI3
TRNP1	AC100791.1	CTTNBP2NL	DLC1
ARHGAP8	TTPAL	MID2	MTCO1P12
RPL35	AC004585.1	PNRC1	EDA
RAB40C	AC004264.1	EMC2	GATA3
NEDD9	FRS3	FAM57A	ZBTB11-AS1
FNBP1	AC110285.2	ITGA2	ACAP1
BRMS1	LINC00641	NGFR	ORAI3
FOXO1	SPRY2	C1orf174	AL353719.1
SNN	BMP3	MUC1	MRPS17
KMT2A	AC004870.2	SZT2	LINC01353
CNOT6L	LINC01963	PDGFA	MYO1G
FBXL20	FABP4	DOLK	MARCO
BOLA3	BAIAP2L2	PTPN12	CSPG4
NME1	LYNX1	MICALL1	TMEM52B
AC034236.1	CCT6P1	CDS1	AC092171.5
RNASEH2C	AC018629.1	TAGLN	DINOL
GPX1	FAM221A	DSE	BCL2A1
GIPR	ILDR1	WDYHV1	ISG20
ITPA	ADH7	FARSA	ZHX2
BCL7C	AL359183.1	ADIRF-AS1	AC139149.1
KSR1	AC015813.1	MIA2	LCE3D
PAQR7	CST2	PTK2	UFSP1
TPPP	COL2A1	STEAP4	BMT2
DNAJC3	MSTO1	UBE2J1	RHOF
GCLC	RGS16	ERBIN	SMNDC1
ACVR1B	PFN1P1	INTS1	GBP4
SLIRP	LMO2	RHEBP2	B3GNT4
HRH1	AC113410.3	MXI1	CCNG1
ASB7	MEX3B	C3	RNF43
PPP1R14BP3	CPA4	CDC42EP5	FAM117A
AL161421.1	AL513165.1	SNAPC1	BIRC3
AC016876.1	PODNL1	PPP3CC	PYGM
ARID3B	WFDC21P	DENND1C	DBF4
KMT2C	ARSI	SIPA1L1	CD3EAP
DAAM1	GGT6	FAM89B	IL36RN
LRRC1	AC008760.2	UBE2D1	SPINK6
HYAL3	FKBP9P1	RAB3D	AL354836.1
CELF1	TRAF3IP3	ARHGAP29	TSHZ3
KRT8P12	AC004951.2	P3H4	PSG1
SNHG11	ANXA2R	TP53I11	PPP1R10
ETV3	AC103718.1	COL5A3	C11orf96
LUC7L3	NKX1-2	NDUFB1	LINC01220
OTUD3	DSG1	CNNM4	TNFRSF11B
STK4	S100A7A	CLDN12	ADAT3
SNHG9	AL662890.1	GCH1	REM2
SGMS1	FOXE1	FTSJ3	MLLT3
GPS2	PLIN4	LIMK1	DAPK2
LATS2	ZNF79	CHD9	OCLN
UBXN7	AL121753.2	HMSD	LINC00887
NOTCH1	TCF23	MPC2	AC244153.1
C19orf24	RN7SL5P	PTPRK	PLAG1
NOC4L	AL160006.1	CSGALNACT2	NACAD
ARHGAP12	ISLR2	PLEKHH2	ZDHHC1
ABHD2	PARS2	NTN4	C12orf76
MEF2D	IGFBP2	LMBRD1	AC004854.2
RPP25L	ZNF710-AS1	SUCO	AC133785.1
BCL9	GDPD2	FAM8A1	TRMT10C
ASB2	SHC2	PLEC	RNF2
THAP3	CH25H	CPSF6	LINC00957
SOGA1	MXRA8	CYBC1	ATXN2-AS
EIF4A1	AL158212.3	TMEM185A	CEBPB-AS1
OTUD7B	AP001486.2	ATP5ME	NPW
POGZ	MAOB	PBX3	PI3
RALGDS	ZNF200	PSMB10	AC087741.2
C12orf57	AL050341.2	DNAJB9	FAM72A
PBX2	NDUFA13	LACTB	PRR22
JOSD2	C6orf223	TLNRD1	DBP
SRGAP2B	AC010331.1	PLEKHF1	AC022916.1
FBXL16	AC005726.1	ZBTB44	ASPG
AC021078.1	SERPINF1	NRP1	AC078883.2
ARGLU1	RN7SL3	HSD17B12	PGBD4
TRIM38	AC011473.4	PCCA	AC106886.5
DGCR6L	HMGB1P10	STK3	AL591846.2
WDR37	AC254633.1	CYR61	TMTC2
ATF7IP	SLC16A1-AS1	CCDC3	RHCG
RPS15	FMO1	FAM129A	Z69720.2
NFIA	AC005005.4	PVT1	LINC00680
ZNF217	HHEX	MUM1	DNAJB3
BBC3	DSG4	FBXL5	OTOP3
GPHN	SLC16A7	TMEM171	ADAMTS1
AFF1	PLXNB3	SCD5	WFDC5
SUFU	IGSF9B	CNNM2	AC106739.1
EFNA4	LINC00892	NR1D2	POLR3H
ZBTB34	BEST1	RTKN2	AL031123.1
INSIG2	2023-03-03	HDGFL3	PSG7
PRKAB2	SNHG20	USP22	STARD13-AS
AUTS2	LY6G5B	TRIQK	GPR61
KLF7	JRK	CEP70	AC092171.1
GPAA1	CD274	MZT1	AL162742.1
CCDC86	PSTPIP1	CASP9	FAM72D
NDUFB11	AP003486.1	MMP13	SLC2A4
FRMD6	TTN	ZNF106	MT-TY
ASL	TMPRSS13	TBC1D23	CPEB3
RIPK4	PIGR	MAP3K13	RNVU1-19
FGD2	IL16	TYW3	CDHR5
SLC22A23	ISLR	ABT1	SBK1
XYLT2	PDGFD	BAHCC1	FAM111B
TIMM13	RAB7B	ZNF513	VPS37D
KAT6A	RBBP8NL	AP5B1	GCOM1
RPS27AP16	C22orf23	NCEH1	SQLE
SLC25A12	ODF3L1	IQCB1	PELI2
CYSRT1	HTRA1	KLHL2	HOXA3
HCFC1R1	MIR600HG	EPC1	PSG6
NFAT5	HAND1	POLR1C	PRMT6
ARRDC3	CLCN1	AP5S1	HIST1H4H
BRD8	ZNF37BP	TANGO2	SLC10A7
NMB	CALML3-AS1	AC010503.4	KRTAP13-2
MRTFA	EML2-AS1	VEZT	AC092123.1
AP003068.4	GJB6	C1orf210	TMEM95
AC105020.1	BCL2L14	CHMP6	KHSRPP1
REX1BD	GAS6-AS1	SAA2	AC107959.2
MRPS12	IGHG4	ESCO1	LINC00520
ZBTB11	SULT2B1	TNS4	AC039056.2
FOXN3	GPAM	FZD2	AL133163.1
SIN3A	DEFB1	2023-03-02	LINC01679
GFOD1	FAM209B	NRG4	C16orf87
PNISR	RAB17	SH3BP5L	TEX19
OTULIN	PLA2G4F	LINC02541	HSD17B7P2
MSL1	CTSS	KIZ	RAB20
MAP3K1	ZNF302	ADPRHL2	AC115284.3
TCF20	NUPR1	SLC15A3	BX323046.1
PHLDA2	IDO1	PXK	SLAMF9
TSPO	AC015660.1	TSPAN5	TMEM269
STON1	ERVK13-1	GATD1	LINC02178
GRHL1	AK4P3	FAM214A	AC084018.2
PHACTR4	ESX1	CENPB	FLJ31104
BICRA	TMPRSS9	SBF2	WTAPP1
AURKAIP1	LINC00514	AL591845.1	MIR205
PLEKHA5	AC006058.3	ADD3	AC003681.1
PRRG1	KRT76	WDR5	AC093162.2
TMEM238	HSPB3	AGO1	AC018647.2
FGD6	FMO4	HEY1	MSC
FBXW7	RN7SL2	COA4	JAZF1
PDE7A	CEL	HSPA8	AC025263.1
CSF2	MAP1A	TASP1	FAM72C
ENDOG	AL121761.1	EIF3C	AL135905.1
MLLT10	LAMA4	ATAD5	LTB
TMEM208	MILR1	NAMPTP1	IL1F10
CDK8	MTCO2P12	ARL4D	RNU6-2
CDKN1B	MROH8	TMEM40	TMEM44-AS1
PTPRS	RN7SL4P	SEMA3A	BCDIN3D
KLHL26	MUC5B	SLC27A4	AL024508.2
TUFT1	MXRA5Y	NOP16	FAM222A
KLHDC10	TIGD3	ARHGAP26	LCE1C
AC115223.1	UBAP1L	MFSD8	AC013652.1
MGAT3	REEP1	CDH8	URB2
CTDSP2	AC004847.1	UBALD1	IQCJ-SCHIP1-AS1
RAP2A	CXCL14	ZSWIM1	MAST4-AS1
GID4	ADAMTS14	RNF138	ESM1
EEA1	BGN	SYNRG	U62317.1
AC006978.1	TNFRSF18	TBC1D15	RPSAP52
L3MBTL1	TNNT2	PKN2	C4BPB
RGS2	LHB	TPCN2	RNVU1-15
FAM160A1	C20orf204	MINPP1	AL365203.2
DIP2B	RPL36A	LINC00511	AL356234.1
NUAK2	HRNR	ME1	MMP10
NHSL1	AC092718.4	KCTD15	IL15
KLF8	AFG1L	CCDC61	LINC-PINT
AC144652.1	MYO16-AS1	BLCAP	LCE1F
FBXO33	FABP6	EMG1	GCNT3
ZNF296	ZNF416	SETDB2	AC104024.2
ATXN1	AC105219.1	MTHFSD	CARD9
GADD45GIP1	SPTBN5	TLK2	ZNF322
PPARGC1A	STAT4	C9orf85	AC107871.2
ADNP2	PTP4A1	ZNF473	AC004477.1
HIST3H2BB	CXCR2	SFT2D2	AL928654.3
TAF8	UGT1A4	YBX1P1	MIR222HG
CRY2	KRT16P4	NUTM2B-AS1	LINC00973
ZFYVE1	EGFL6	TANK	HIST1H2AG
INAVA	HSD11B1	GPX8	SYDE2
AL049840.1	AC079174.1	AL592183.1	MOCS3
DOHH	AC093627.1	BAG5	CRCT1
SLC45A4	AC025287.2	ANKRD36C	AL109615.3
GLCE	INHBA-AS1	PLA2G2A	RAPH1
TULP4	KCNMA1	TMEM115	AC017104.2
MINDY2	AC245140.2	GBP3	AP002478.1
GIGYF2	COA7	PES1	FLJ42969
SELENOH	AP000350.6	NUDT12	AC124276.2
FAM126B	PRMT8	SPATA2	AL136084.2
TP63	CRYGS	HIF1AN	AC105345.1
PEAK1	ZMYND10	SNAPC3	USP17L1
RNF165	PRPH	FBXO41	WFDC12
TMEM160	FMO2	RPS7P10	CDH16
RNF152	TATDN2P2	AC083799.1	ATP2B1-AS1
EGR1	SLC41A2	INPP4B	HIST1H2BH
COMTD1	IPO5P1	HYAL1	AC093270.1
SKA3	TDRG1	RPSAP47	AC084346.2
SURF2	FSCN2	FAT1	MPRIP-AS1
FBXW11	UCKL1-AS1	OSR2	C10orf91
AC099560.2	AC105046.1	WWC2	RIOX1
AC092803.2	AP002364.1	CXADR	CASTOR1
CCSAP	APOBEC3G	HMMR	SPRR2C
FMR1	ELMOD1	AC008124.1	LINC01136
USP49	RPL22L1	AMIGO2	LINC00472
MSH5	NTNG2	ATAD3B	RP1L1
AC122129.1	AC090912.2	PLPP1	CHRNA10
NPTN-IT1	CKLF	MDFI	IFNL1
GABPB1-AS1	MTCO3P12	C2CD4C	THEMIS2
RBMS1	ACPP	TP53RK	TNFSF9
SPEN	AC233968.1	SLC25A40	LCA5
RPS7P11	AL136298.1	PARD6G-AS1	AC106037.2
SLC10A6	AL391244.3	SMG1P2	RF00019
GP1BA	DLG2	SYT5	AL139819.1
UBXN11	NLRP12	CLN6	FZD10
BCL7A	AC105460.1	GSDMC	EXOC3-AS1
DANCR	TMPPE	TRIM56	SCARA5
EBLN3P	SARNP	RPL17	AC037198.1
CCNG2	AC009078.3	SCAPER	CYB5R2
BCL11A	AC074212.1	CSRNP1	CRYBB3
AC007969.1	RHOXF1-AS1	AASS	AL450322.2
AC132008.2	AC010973.2	EEF2KMT	KCTD6
SPRED2	LINC00482	LIN7B	CENPBD1
AC015712.7	AC069148.1	RASSF3	AC091564.6
CLCF1	AC092171.2	POC1B	PLS3-AS1
MIER2	AC009802.1	SUV39H1	OGFR-AS1
PGRMC2	MYH3	TTC28-AS1	LINC00370
MCL1	MPIG6B	MMP12	LINC01123
PEX12	MAST1	HOXD9	AC073592.4
LPAR5	AC004656.1	TMEM52	SH3PXD2A-AS1
CCL22	A2ML1	POLK	AC025180.1
NDUFC2	KCNIP3	LYSMD2	BTBD16
DCP1A	SAA2-SAA4	SLC35A5	PSG5
ATL2	AL591806.1	DHX34	SLC26A9
PTCH1	HSD17B11	ZNRF2	C7orf65
HOXA1	AC044860.1	MRFAP1L1	IL20RB-AS1
EFNA1	CACNA1A	AL021392.1	LINC01629
SMAD5	HLA-G	RGS17	ZNF425
VASN	BEND3	FAM111A-DT	HIST1H2AI
RPL13P12	AC015802.6	FOXRED2	KCNB1
ARL14	AC068594.1	MTM1	AC002401.4
ZMYND8	AC004980.2	POLR3K	KIAA1755
TMEM179B	CRYBA4	OSGIN2	MIR3648-2
MIER3	ALPG	LINC02035	ZNF547
BMPR1A	NSG1	LINC00674	TMED6
COX6B2	FTH1P11	TMEM203	TLR6
RPL9P9	AC089983.1	AC010343.1	TEC
RPL10P16	DNASE1L3	MOB3A	TDRKH-AS1
AP006623.1	UMPS	ZNF688	TULP2
KCNK10	SPRN	FAM133B	HCAR2
RASD1	IGHG2	CLK2	TAF11L11
PIAS1	HIST2H2BF	TMEM200A	AC136604.2
ZBTB5	GPRIN2	BORA	FEM1A
HMG20A	HSPA7	AC012313.1	AC116351.2
RSBN1	ASPDH	AC125232.2	HIST2H2AA4
METRN	AL731567.1	PLEKHA3	LINC01828
MXD1	WNT16	PAPPA	AC020907.3
NME2	CHRNA2	ZNF264	FIGN
KLHL28	UGT1A5	LINC00205	ZNF433
ZFHX3	CHKB-DT	NOP9	TTC30A
COL4A3BP	DRP2	CSTF2T	MRVI1
AL512791.2	AC022509.3	DLEU1	AC129492.1
NDUFAF3	AC097461.1	RTL6	AL451074.2
ZNF436	CLCA4	CNOT4	AL451042.1
SLC17A5	AC010978.1	AC100801.1	ALDH8A1
CASZ1	RAET1E	RP2	PTGES2-AS1
DUSP10	HMGN2P46	CCNK	CCL4L2
ZBTB7B	GKAP1	SENP7	MTRNR2L12
CD44-AS1	TRPV3	SRSF1	AC004707.1
MORC3	AC007785.1	RSRC1	AC005540.1
USP32P1	AL139089.1	WDR53	AL591684.3
SS18L1	FTH1P10	MIR3936HG	AC090099.5
FAM83B	TWIST2	SMAP1	LINC01348
GPR157	GRIN3B	MIRLET7BHG	WNT5B
ETAA1	DM1-AS	FAM13B	TMEM51
FEM1C	RN7SL600P	PTRH2	LINC00672
STRN	AL662844.4	SERTAD3	PLPPR3
PLEKHM3	SNORD3B-1	BNIP3	PDK4
ZNF618	AC010168.2	COG8	LINC02595
SFSWAP	AC018665.1	SOX4	LHX1
NR3C1	CBX3P4	LRP11	GRWD1
CDC42SE2	ANGPT2	PXMP4	MIR29B2CHG
SGK494	DPEP1	EXOSC2	FAM174B
IL1B	AL078621.3	AC144530.1	AC087276.1
ZKSCAN8	PCYT1B	STARD7	FAM83C
TIPIN	FAM25C	FIZ1	AL160412.1
RNF19A	NCF1C	GPR137B	AL138689.2
HES1	EFCAB13	KCTD17	APCDD1L
GNE	TUBA4B	LCORL	AL133215.2
MAP3K21	AC215522.2	RPS20P14	AL391095.1
KMT2D	NPY4R	MMD	AL139423.1
CCDC144A	ZNF649	CDK19	RNU5A-1
AL118516.1	CICP14	ZNF202	AC019069.1
TMEM202-AS1	KRT16P5	UHRF1	GJA4
AC016734.1	AL513477.1	ANKRD52	ZNF75A
GCSAM	NAPSA	FUT2	BTG3-AS1
TRAM2	LINC00893	ZNF562	AL450322.1
UNC5B-AS1	LINC00920	YAF2	AF196972.1
DGKE	AP006621.5	SRGAP2C	AL162231.2
RC3H1	CFI	DENND1B	DPEP2NB
KMT2E	LHX2	DOCK4	AC124276.1
LMTK2	ZFP30	MCEE	AC093904.2
ARHGAP42	AC026979.2	HSP90AA2P	AC087482.1
AL691432.2	OR10S1	THUMPD2	ERVMER34-1
SLC9A6	AC131212.3	ALKBH2	GZMM
DOP1A	SH3TC2-DT	AC025857.2	AL512363.1
RASA2	PRRT2	C9orf40	RPL39P38
PANK3	AC144831.1	DMD	TTC30B
SPRYD4	KSR2	RHBDL1	AC120024.1
BLACAT1	C17orf50	ZNF621	ANKRD20A11P
BCL9L	AC093627.6	CLTCL1	AL158152.2
SLC39A4	NLRP10	FAM200B	CXorf49
AC104046.1	AP000786.1	ZNF623	KRT18P34
ASNS	WNT11	ZCCHC7	S1PR4
RAB14	SLIT1	TBC1D9	C22orf15
MGRN1	SPDYE1	MAGI3	AC092053.2
TBC1D22B	RPL10P2	ZNF830	AC090023.2
ARID3A	AL137003.1	ZNF433-AS1	HIST1H4E
RRP15	AC010491.1	GOLGA8A	AC073592.2
CCNA1	RPL12P10	HOXA4	AC148476.1
AC025259.3	PLUT	MFSD9	COLCA1
LRP6	CD300LB	AL118506.1	RNU1-27P
PER2	AP000936.3	TRPV1	LYNX1-SLURP2
KCNK6	SIX2	SLC35B4	OGFRP1
AL365181.3	AL080317.3	NOS1AP	C19orf33
MSL2	AL627309.6	HOXA10	AL449423.1
ST3GAL1	LOXL4	EGR2	ADARB2
BACH1	AL138781.1	CPLANE2	AC233699.1
UBOX5	STBD1	CYREN	SLC16A11
VDR	AC110619.1	ZNF517	LCE3A
CAMTA1-DT	KCND3	GULP1	CX3CL1
PAPOLG	SIK1B	TOB2	C1orf162
TBX3	AP001830.1	P2RY11	MIR200CHG
AP003068.2	CCDC121	FAM200A	GCNA
PRAG1	PALD1	TYW5	PTGER1
PHF12	DEFB4A	TRIM21	AC021066.1
SETBP1	TNNI1	ZNF629	ITGB1-DT
SESN3	CDIP1	IRGQ	LINC01215
AL360181.2	LINC00235	YBX2	BX276092.9
AC010478.1	LINC00852	RBKS	CR769775.4
IRF2	PGBD2	ZKSCAN1	AC093462.1
AC012306.2	RNFT2	CTC1	AC006001.2
FOXD1	ZNF557	MFAP5	PIK3IP1-AS1
TAX1BP3	AC087385.1	FRMD8	AL158801.2
ZUP1	WISP2	SFXN2	AP001330.5
NCKAP5L	SLURP1	MAMDC2	AC062015.1
RBPJ	GFI1	TMEM186	AC092287.1
REL	AL355102.2	RBM45	KRT23
MUC20-OT1	FSTL4	RPL7L1	GPBAR1
DNMT3A	AL391825.1	RNF227	FAM157B
MBOAT1	PLAC9	EEF1AKMT4	AL391095.3
RIC1	AC245014.3	FAM173B	FAM131B
AHDC1	DPF3	SNX16	AC063960.1
CPEB2	AC022007.1	HCFC1	AC008440.1
AP001527.2	AC005394.2	MRM3	AP001043.1
SLC25A25	CYP2D6	DLL4	Z93241.1
MAST3	SLFNL1-AS1	CTBP1-DT	AC004840.1
DNAJB14	FALEC	FEN1	AL451065.1
FBXO11	AC007040.1	SLC38A7	MTND1P23
COX6A1P2	AL096865.1	AC092117.1	AP000812.2
PIP4P1	AL031587.5	LHFPL6	AC018695.6
PDP2	AC025178.1	TMEM79	PTCH2
AC006058.1	LINC01843	CGB7	CACNG8
FAM76B	GPX3	ARSK	LINC01589
ARID5B	AL390195.2	PTN	RPS2P32
RPL35P1	SYT1	AL390719.2	AP001330.3
OSER1-DT	AC004951.1	ARG2	GPER1
FOXO6	AL139287.1	UBE2Q2P2	LINC01989
SLC2A12	AL513497.1	ZBTB42	LINC00393
LSM11	TBX4	RIPK1	LINC02584
AC016739.1	SYNPO2L	OBSCN	PROX1
ZNF449	AC135050.7	SP140L	AC104109.2
PHYHIP	AL512791.1	NINL	AC087588.2
RAB33B	ZNF860	FADD	AL022313.2
DDN	EPHA1-AS1	RPL37AP1	SLC10A1
PARD6B	AL035413.2	TXNDC16	AC084026.3
IFNLR1	AC016773.1	DNAJC14	PCNPP3
HIST1H2AE	AC018845.3	SLC22A17	BICD1P1
MAP4K3	C6orf222	ADGRF4	ACP4
EDEM3	LINC02031	POLR2J4	CFLAR-AS1
AC087623.2	S100A1	ALOX12B	KLB
C6orf120	KLHDC7A	HLA-H	AC012368.3
KAT6B	AC120053.1	GEM	AC106782.1
ZNF431	SLC35G3	BORCS8	AC027329.1
MIR3687-1	ALOX5AP	MST1	MIR4512
LBHD1	ESR2	AL359220.1	AC010761.6
PLA2G4B	AL353796.1	DHODH	AC005899.8
PPP1R15B	AC130456.3	GEN1	LINC02539
DEPDC5	IKBKGP1	MFNG	CCL3L1
TLE3	AC007285.1	C1QTNF12	WDR38
MAP1LC3A	GATA5	FUT10	C16orf71
CNEP1R1	AF127577.4	SMCO4	CLDN17
HIST1H3H	SCNN1G	THTPA	LINC00365
TJP2	FTLP14	AL391244.1	HIST1H4D
FBXL14	AL031846.1	C8orf58	AC084036.1
UBN2	AL121987.2	AC005520.2	AC105001.1
HIST1H3A	NGF	YAE1	TNFRSF1B
ARHGEF26	GBP5	DHDH	GPR50
MRPS18C	AC002094.5	HCG18	AC009171.2
TP53INP1	PHKA1P1	RDH13	N4BP2L1
MOB1B	AL121790.2	TTC33	AC104066.1
HIST1H2BG	AL162171.3	NXNL2	AC027279.2
AC005336.3	AC024909.2	REPS2	HSPA6
ELF3-AS1	TMEM156	MED26	SNORA59A
PTAR1	ARHGEF6	ANAPC10	LMLN2
MPZL3	AL136982.6	PSPN	AC099552.4
PUM2	AL353807.2	PSD3	LELP1
JPH1	TEKT3	SYNJ1	PLCXD2-AS1
THAP2	TUBB1	MTERF4	HPS6
SOCS1	CHRNE	ZC3H10	AL157904.1
AP003733.4	RNF32	TMEM182	AC010616.1
ZYG11B	SLC30A3	KTI12	SLC35A1
ITPKB	AC008035.1	SMPD3	RGL1
GTF3C6	UGT1A2P	SGO1	CDH5
ZNF480	MIR25	PER3	AC003965.2
RFX7	CWH43	RAD51-AS1	CHADL
MRPL23	AL353708.3	ZNF324	SPINK1
AC004148.2	ITGA6-AS1	DDX17	LINC00431
GNG11	LINC02593	ZNF586	SAA4
ELMSAN1	ZNF155	AC098864.1	PRPH2
TAOK1	IGSF1	TOPORS	LGALSL-DT
NKX3-1	PCDHB13	C17orf51	CLDND2
FAM160B1	TSPAN11	GHDC	TMEM121
RASA4	LINC02036	CCDC78	LINC01504
AP001362.2	AC020763.4	CNTNAP3C	CFAP44
ZNF440	AC099568.2	SDR42E1	MYO16
SP4	SNORD12B	CCDC144B	AP003062.1
GAB1	TMEM190	APOLD1	ZEB1-AS1
RGMA	MIR4252	COL4A4	Z85996.1
ZNF526	SPDYE6	SAMD12	TULP1
TPGS1	NR0B2	MYOM2	OLFML3
PUS10	TXK	GABARAP	MIR200B
LDLRAD3	RPSAP5	NEO1	AC145207.5
HYPK	SNORD3C	IRX1	PSG9
KIAA0355	AP001363.1	NORAD	ACTBP13
AKAP10	KANK4	SCN9A	AC013476.1
P2RY2	LINC02288	AC132812.1	AL627422.2
C6orf226	LINC01551	MMP25	AP003392.4
CISH	ZNF725P	GNRHR2	CYP11A1
FAM102B	LGALS2	CLSPN	RNVU1-7
WSCD2	LINC02582	BYSL	BHMG1
ISCA1P4	AC245033.3	C1orf216	BAAT
KAZN	HSPA12B	IL7	AL132780.2
IRF9	HOXC8	AL392172.1	SLC25A34
IFI6	AC011467.1	PRELID2	CYP3A5
AL139095.2	AC021422.1	LINC00667	RNU4-2
TPI1P1	AC145285.2	THAP7	AP000619.3
RSBN1L	ELAVL3	ZBED1	IFNK
UBE2G1	ARL6IP4	GALR2	AC017104.3
ZNF467	CES1	ABHD15	PGLYRP2
SLC5A3	RPL21P93	ERCC6	TMEM272
VEZF1	AC107027.3	TREX2	RDH8
PUM1	NEUROD2	AC007240.1	PAGE2B
ENTPD7	TSPY26P	YJEFN3	AC073130.1
ANKRD50	AC012181.2	GTF2IP13	AC127070.1
BX470102.1	AC005307.1	JMJD1C-AS1	ANKDD1B
RAB11FIP1	SUSD2	NEU3	RN7SL399P
ZNRF3	AL627171.2	C19orf47	IFNE
FBXO46	AC023300.2	JMJD4	CU639417.4
AC242376.2	LINC02043	KLRG2	NPR2
MTMR3	MIR34AHG	C17orf67	GIMAP2
MAFA	SLC5A10	LINC01106	AC005332.4
SAPCD1	AC012020.1	ZNF2	CAND2
SMARCE1	NEK5	METTL7A	FOLR3
ELL2	AC112220.2	ZNF552	RAD51AP2
PPP2R3A	SYT17	AC115618.3	RAB44
CRIP1	AC037459.3	ACTR3C	PDE6G
KRT7-AS	TSSK4	AC002310.6	AC007249.2
AC093673.1	AL121658.1	RPP38	AF131216.4
SEMA4C	AC090970.1	PTCD1	AC008663.1
BTBD9	AP001619.1	AC112777.1	LINC00656
RELL1	NR5A2	PTPRR	LINC02528
STRADA	MEGF11	ZNF512B	LINC01363
ARHGAP30	EYA2	STAG3L2	AC005479.1
AC009113.1	NOVA1	GPT	AL603756.1
PIK3R1	AL356019.2	PROB1	AL353898.3
FGF11	SOBP	H2AFVP1	AC010327.4
RTN4RL1	HNF4G	HAS3	LINC02454
ZNF407	PLD4	AL121772.1	DMBX1
ELK4	TSPO2	SURF6	AL359504.2
EGFR-AS1	FXYD7	NUDT17	PSG4
LYSMD1	RPS12P26	AAR2	SPANXN5
FLNB-AS1	AL121895.1	FAM86DP	CD3E
ZNF697	AGAP13P	AC139530.1	FOLR1
RXYLT1	SHC4	SERHL	FAM25G
AL133230.1	RPE65	LAMA1	SIAH2-AS1
HLA-F-AS1	SLC22A31	GEMIN7	AC008406.3
CLDN3	SMPD5	EXOC8	MUM1L1
SECISBP2L	AC012435.2	AL357079.2	Z83851.1
AC108010.1	ST18	EIF4BP3	TAS1R3
DNAJB5	AC012513.3	HMOX1	AC145207.9
RPL13AP25	AL445645.1	SNRPEP4	AC114812.4
PDIK1L	AL513327.1	AC007325.4	AL049767.1
FMR1-IT1	AC104581.4	NRDE2	MRGPRX4
RAPGEF2	AC108673.3	SRRD	AC007881.3
RAD54L2	AKR1B15	WDR35	AC006262.4
GPR39	AC138150.1	TPM3P9	AC026470.2
ZNF500	RPS2P7	ARHGAP24	AC080112.3
DNMT3B	MEG8	DNASE1	MSH4
PDF	CA7	TPPP3	AL513523.2
TRAF6	SMIM11A	ZNF77	PLIN5
STARD13	LRP4-AS1	ELAVL2	CRYM-AS1
AC083843.2	AL583722.1	PPRC1	AL356234.3
NDUFA4L2	CLTRN	SARS2	PAQR8
RRAD	AC068768.1	NUDT19	PLIN1
MYLIP	C1QTNF3	LPXN	LINC01431
IPMK	AC012531.1	FAM171B	AC012676.1
AL731569.1	ITLN2	IGSF11	UGT1A3
FA2H	KRT20	CAMK4	AC010624.1
ZNF823	AC107068.1	CCT6P3	PPM1H
AL355488.1	RARRES2P2	HMGN2P5	TTC24
IGFN1	AC114812.3	GPRC5D-AS1	AC087385.2
EGR4	SLC13A4	ZDHHC11	MIR219A1
AC124319.2	NTNG1	DKC1	AP002833.2
ZMYND15	AC004895.1	SNRNP35	KRTAP5-AS1
PPIAP11	AL022322.2	RTL10	AF015262.1
HIC1	AL354692.1	AL121832.3	DBIL5P
RRS1	AL133351.1	GEMIN4	KRTAP19-5
FAM117B	ATP13A5	FAXDC2	RAET1K
ARHGEF10	MSNP1	PLAGL2	RAPSN
LTC4S	XIST	RPS2P55	AC005479.2
MT-TL1	AC092903.2	PLCXD1	GSTT2
AC004951.3	TRMT9B	ZNF865	MED12L
SSBP3-AS1	TEX21P	ALKBH4	DGKG
2023-03-08	FAM25BP	GRB14	LINC01909
AC109326.1	AL604028.1	PINK1-AS	LINC02057
SASS6	AL122010.1	NID2	IFNL2
ZNF791	KCNN1	AC242842.1	AC131009.3
AC132938.5	AC080188.1	AC018521.5	FAM189A2
AC132938.3	IGLV5-52	GTPBP2	AC068473.3
BDKRB2	HDAC2-AS2	GIGYF1	RAP2CP1
TIPARP-AS1	MFAP3L	UBIAD1	AC009086.3
AL138756.1	BTBD18	GRAMD1C	AC008438.2
PPARGC1B	PLA2G5	ZBED4	DLEC1
AL137060.1	AC006262.2	ARHGAP25	HIST2H4B
LIN54	AC005674.2	MON1A	AL136531.1
AC092306.1	AL592071.1	LINC00900	AP001033.2
AL133330.1	FAM156A	MT-TE	HEY2
IGIP	PCDH9	C19orf71	KLK4
AC114488.2	TOMM5	SLC16A14	SNHG25
MAP1B	AC007537.1	TRMT12	AC010336.1
TTLL3	Z82243.1	LINC01315	AC090515.2
TLK1	LARP1P1	ABALON	CPEB2-DT
SNRK	BEST4	GRK4	AC084262.1
PILRB	RDH12	PLCD4	BX005040.4
BAMBI	PCBP3	UBTF	ACTBP2
APOE	LINC00866	LINC01389	AC135279.3
PRR34-AS1	MARS2	MED7	AC006262.3
AC006058.4	AC027763.1	LINC01481	AC022915.2
SEMA6D	RN7SKP80	AC016831.6	MIR221
MIR320A	SLFNL1	ASPRV1	AC097534.2
ANKRD10-IT1	PRUNE2	ZNF658	POU2AF1
TET2	AC092958.3	AL590627.1	GZMH
AC006333.2	AL136298.3	AC105285.1	AC007249.1
LINC01003	TEX26-AS1	FGF19	CALHM3
TBC1D12	RARB	FBXL18	AC245014.1
PPM1B	LINC00106	ALDH1B1	SLED1
AC105429.1	HERC2P10	ZNF268	KRT36
PRDX3P1	EEF1B2P6	AOX1	ALKAL2
WIPI1	ZNF587B	SELENOP	AQP6
MICE	SPRR5	AC099066.3	RNF151
DNAJC30	IRS3P	ADA2	PEG13
LINC00513	AC024560.3	TLR3	AL121672.2
ZNF627	MAK	SULF1	PAMR1
USPL1	AC090971.3	RPL7AP66	AL157791.2
ZNF148	ST3GAL1P1	ELOVL4	HOXB1
ZNF280C	CD177	BACE1-AS	BX276092.7
C1orf50	FLT3LG	U62317.2	AC008556.1
ST20-AS1	ASRGL1	MFSD14A	FOXD4L1
NFE2	BIRC7	LTV1	GPRASP1
METTL27	RPS6KL1	IQCC	AL157935.1
ENG	KCNJ11	ARNT2	AC018529.2
ADM5	LINC01355	HOXA-AS3	AC007686.4
SYBU	AC008649.2	KCNJ14	AC017002.1
CAPN12	AC073316.1	JPX	GDF6
STAG3L5P	RN7SL219P	PRRT1	POPDC2
HIC2	SMIM5	HAS2-AS1	RNVU1-1
AC012360.3	AC009088.1	ZNF764	AC006111.2
ZNF827	H19	TCAF2	AL138902.1
ARHGAP5-AS1	EXTL1	SIDT1	LGALS9B
AC025181.2	ZNF543	HSPE1P2	TIGAR
KANSL1L	CEP112	MRPL53	FAM238C
AC010976.1	AC016405.3	ZNF614	Z99916.2
MEIS1	TTC34	ANXA9	AL592546.1
AC015849.3	AC009126.1	ZNF747	AC022364.1
SGMS2	NCBP2-AS1	AC016747.1	AC108058.1
AC005336.2	AC015909.5	ZNF837	AC007041.1
AC079250.1	AL031600.1	ALG1L6P	GABRP
DACT1	CD5	JCAD	PAX8
C10orf105	AC080080.1	SORBS1	AC023424.2
MTF1	AP001351.1	ZSCAN12P1	CEACAMP11
URAHP	AP000812.1	AC122718.1	LRRC4C
HCG27	BORCS8-MEF2B	MAK16	AL357033.4
FARP1	SNORA5C	LINC01907	SMIM2-AS1
ZBTB37	AL732414.1	OPA3	RIMKLBP2
TNXB	AL023803.2	ZNF445	AC093904.4
FAM157A	CHN1	GPR37	KRTDAP
PRKCZ-AS1	ASB16	PAK1IP1	CEACAMP4
LYPD2	AL109811.3	AK9	ATF4P4
AC073195.1	CACNG6	GINS1	AP001046.1
POU2F3	CCDC166	EDNRA	RBMS3
DNAH17	AC093297.2	CAPN14	AL353759.1
AC122688.3	AL645939.5	ACSL5	AOAH
AL031670.1	CBS	AC005288.1	AC015914.1
AC084125.2	AP001350.2	FRMD3	FLJ45513
SPATA7	KRBA2	NOL9	LINC01068
AP002360.1	AL590369.1	GPRASP2	AL031123.2
FBXO42	AP000925.1	TSHZ2	CCL26
C3orf14	AC113355.1	WDCP	FBLL1
AL139407.1	TPK1	SPICE1	SLC6A14
SATB2	DOCK10	SLC35E1	LRRN4
PHLPP2	AC011603.2	DDTL	KCNS1
ADRA2B	LINC00638	ZXDA	AC106886.3
AC005519.1	RPL32P28	AC004967.1	AC116407.2
SPIN4	AL035420.3	C9orf84	CARD18
NOL12	RNU6-1092P	AL136295.7	PKD1L2
AC011337.1	Z94160.1	AC007182.2	AC083841.4
POU3F1	PITX3	ENTPD8	AC021097.3
AC087203.1	HSH2D	C2orf42	MSX1
NONOP2	RASSF2	LINC01291	SLC25A47P1
AL353622.1	ALG1L9P	AC136632.1	CCDC89
AC092611.2	ICA1	AC010969.2	G0S2
SNORA60	CARMIL2	CES4A	AC073410.1
AC090004.1	FAM24B	CAMK2B	GAL3ST1
ARID1A	AC011374.2	ZDHHC8P1	SERPINA6
AC010733.1	COX20	TIRAP	AL445253.1
AL355338.1	UBE2V2P3	KLK14	FP325330.3
AC114812.2	ZNF814	AC005383.1	AC135352.1
BAG4	VSX2	ZNF607	NPFFR1
N4BP2L2-IT2	LINC02256	EXOSC6	PRMT5-AS1
CXCL6	AL033519.2	AP005264.5	AC023300.3
ZNF714	AC067838.1	MUC20	WDR95P
LINC01465	GP6	RPS10	LIPM
DCUN1D3	CPNE8-AS1	SSSCA1-AS1	AC116407.4
AL645728.1	MEFV	TRPC1	AC040169.3
FLJ13224	TTLL7	ZNF25	AC011912.1
ZNF678	PPP1R26P1	CBX3P9	C15orf48
AC068338.2	AL359091.1	AC009005.1	AC080013.1
MAL2-AS1	AC005865.2	SP5	Z82217.1
WFDC3	SCUBE2	AL592148.3	IFI30
AC005336.1	PDIA3P2	POMGNT2	AC009716.2
ZNF555	AC005537.1	AL353743.1	AL606760.3
RIBC2	CEACAM7	AC000123.3	UCP3
AL031118.1	LINC00628		HLA-DQB1-AS1
AC083973.1	AC007342.5		TTYH1
AC084337.1	AL159169.2		AC008610.1
AC092535.4	DNASE1L2		AC090673.1
LINC00857	TONSL-AS1		RORB
TIGD6	GOLGA8G		AL158211.5
PIGCP1	IL9RP3		AC004080.4
KCTD21	CHP2		NME2P1
ABHD17C	C20orf197		ZFP3
USP37	AL035461.2		SSR4P1
BMPR1B	RN7SL455P		AC092755.2
CPT1B	DSC1		CXCR1
DNAJC19P5	LRRC37A14P		BEND7
AC015712.1	SEC14L3		AC005180.2
AL121603.2	ACTG1P3		LINC02175
AC007336.1	CALML3		ASCL2
AC114947.2	AC114812.1		AL023806.3
2023-03-01	EN2		SPRR2B
C2orf69	SENP3-EIF4A1		LINC02055
MVB12B	TMIGD1
ZNF182	CCDC183-AS1
APOM	SNTG1
TRPS1	UQCRBP1
SNHG21	AC026367.2
IL13RA2	SEC14L5
TCF7L1	FDCSP
PXMP2	AL807752.1
RNU1-28P	FBN3
C1orf53	HNRNPA1P33
SNORA73B	HNRNPA1P54
SOX2	CFL1P5
NDUFV2	LINC00677
SLC7A5P1	RBFOX3
HIST1H2BE	AC090844.3
FOXJ3	EEF1DP1
AC124319.1	IKZF3
KANSL1-AS1	AL031777.1
AC234582.1	LAMA5-AS1
SLC34A3	AC105339.3
AC027290.2	AC124045.1
ZNF426-DT	SH3GL1P1
AL133355.1	PCK1
AL442125.1	AC093392.1
ZDHHC11B	SNORA71C
C17orf97	CSNK1G2-AS1
AC087239.1	SGPP2
AL078581.3	GTF2IP7
TNS1	PLCH1
AC008147.2	SP2-AS1
AL359922.2	SLCO4A1-AS1
JAK3	CHRNG
MAGIX	AC080013.4
ST7-AS1	CNTF
LPCAT1	PLA2G10
AC024451.2	APOBEC3H
UGT1A7	AC130371.2
STK35	FTCD
FLJ30679	TMEM176A
ZNF230	IDI2-AS1
VGLL3	PGA3
SATB1	IGHG1
ISL2	LINC01447
ATP2C2-AS1	LINC00661
FLJ42351	AC011247.2
FZD9	AVIL
MFHAS1	SLC25A47
ACTRT3	HIST1H2BF
IL12RB2	LMO1
Z98884.2	AL109615.2
DLGAP1-AS1	HSP90B2P
MIR33B	AL049629.1
AC087203.2	AC124784.1
RBP5	RPL5P23
MFSD4A	SLC1A2
FAM157C	AL031710.2
AC004706.3	MFAP4
MIR6867	AC073314.1
TIAF1	RAB11FIP1P1
LINC00894	SH3RF3
AC093484.4	AC084026.1
LIFR	TOP3BP1
AL160408.1	HNRNPA1P49
KALRN	LINC01494
INO80D	SYNDIG1L
GXYLT1	ROCR
SNORA31	PRR7-AS1
CCDC134	ANKRD53
AC005839.1	MT-TS2
SPEF1	ADAP2
ANKRD61	AC092611.1
EGFL8	AC008764.10
AC106037.1	EVA1C
AC026471.4	AC244197.2
SLC39A1	TAS2R14
FHDC1	CFP
HIST1H2AJ	VDAC1P2
HIST1H3C	CR383656.1
AC098934.3	AC104129.1
AC132942.1	SLC5A2
RPL13AP20	AL359636.1
STRC	IFITM4P
TPSP2	LINC02026
AP002381.2	NTN3
GLYCTK	AC022167.2
RNASEH1-AS1	PRELP
ACVR2A	AL731533.2
RPL29P14	AC104134.1
CIART	AC008813.1
RN7SKP23	OR10H5
ABHD17B	GABRG2
AC012640.2	IGHG3
AC018695.4	ZNF90
CEACAM1	PLCL1
HEXIM2	HOXD1
AC131212.2	AC112694.1
AL391427.1	NPM1P11
DHFR2	ATP10B
EBLN2	CIB3
MAML3	AC090519.1
ABCG1	SPDYE2
TBC1D10C	AL162615.1
SMIM10L2A	VWA8-AS1
RAB43P1	DUSP19
KIAA1324	APLN
CASTOR2	HMGB1P31
AL358334.3	AC243965.2
AC078883.1	ACTG1P20
AC120057.3	SERF1B
FRAT1	HERC2P3
RFPL4A	GRIK2
AL355353.1	AC012676.5
FAM83C-AS1	AL162872.1
AL442128.2	TFAP2D
AC108673.2	RFX4
CFAP46	AC027644.2
AL391839.2	RPS16P5
INE1	GIMAP1
B4GALT5	ENDOU
AL157888.1	SERPINB12
HIST1H3E	AC096992.2
AC069257.1	ZNF861P
AP001052.1	CSF1R
AL031848.1	AC123912.5
YTHDF3-AS1	AL359397.1
FOXQ1	GRIK1
AP005899.1	COL1A2
AL136164.4	SLC7A4
AC090498.1	MARK2P8
AL031281.2	ADD3-AS1
ABCG4	AC145098.1
HMGXB4	PGAM4
AC068870.2	AC004975.2
AC007728.2	AC011298.1
AC023157.3	SFTPA1
AC004034.1	SLC35E1P1
AC004623.1	BHLHE40-AS1
TAGLN3	SNORD88A
AC022819.1	AC017074.1
B3GAT2	AC132872.4
CASP1P2	HAL
AL033397.2	AL732292.2
ALKBH6	RN7SL426P
AC091271.1	AC105206.2
CHAD	MGC12916
S100A12	CRX
DDX47	NPSR1-AS1
SELPLG	SYNC
ITGA11	AP003086.1
AC008537.3	AC011611.2
ZBTB3	CYP2AB1P
NT5DC4	LINC01800
AC010719.1	RUNDC3B
AC100810.3	AL157394.1
AC087521.2	AP003063.1
AL449212.1	PLCB1
PRICKLE2	KIAA1324L
AC007382.1	CLDN2
AL928654.2	AC015818.3
SNORD6	CCR3
GRHL3
TSHZ1
MAPK6-DT
AL033384.2
TPT1P5
SNORA3B
PRC1-AS1
DLX6
VLDLR
ZNF284
AC002467.1
DNAJC27
B4GAT1
RBP3
AC098850.3
AC009090.1
RAB4B
MAMLD1
B4GALT1-AS1
FP236383.2
KRT8P46
PHACTR2P1
AC027514.2
AC010335.1
GPR63
AC245060.5
C10orf55
AC024075.2
AC132192.2
USP2
AC013394.1
FERP1
CROCCP3
AC022154.1
RASA4B
AL031846.2
AF131216.1
HES5
AL353625.1
RN7SL809P
DARS-AS1
AKR7A2P1
CASC11
AC011472.1
CST6
MIR9-3HG
AC132192.1
FGFBP3
AC012146.1
ALG1L13P
SYT14
AC091982.3
TFAP2A-AS2
AC137767.1
C11orf71
AC104695.2
AC108134.2
AC137630.3
PWAR5
AC025917.1
RAB37
AC011472.2
DCUN1D2-AS
AC004825.2
AC009090.6
GPR173
AL021368.2
IFNWP19
JARID2-AS1
TRAPPC12-AS1
AC103706.1
SNORD14A
CHKB
TUBB2BP1
PP7080
AC025287.3
SPRR3
HIST2H3D
AL360091.1
LINC02586
CDKL5
AL359921.1
AC009831.1
AC072061.1
AL731566.1
AL133243.3
AC018904.1
ADGRL2
AC016831.4
AL450998.2
AP001793.1
KCNAB1
AC008760.1
ZNF529
DNAH10OS
AC082651.3
AC106782.2
MAFG-DT
LCE1E
LINC01004
AC137932.3
AC108449.2
P2RX5-TAX1BP3
PDXDC2P
AC073548.1
AC105052.4
MGAT4A
BSN
RPL23AP53
MIR7845
LINC02029
HSPE1P4
AC093535.1
AC108488.1
AC124068.2
AP000442.1
AL031432.4
AL627230.2
ZBTB40-IT1
AC080162.1
PPP4R2
PEBP1P2
C1orf68
SPTY2D1OS
AC007191.1
AL683813.1
ZNF680
HIST2H2AA3
AL445187.1
CHIC1
AC023043.1
AC023157.1
RNU6-1161P
AC025171.1
AMTN
AC009097.4
AC006435.2
AC078923.1
MCCC1-AS1
STAG3
LINC02137
BCOR
AL163051.1
LRRC32
SGSM3
AC118344.2
AC104825.1
ERICD
SLC35G6
SHISA2
RPS10P7
BEND3P3
STK4-AS1
MYLPF
AF001548.2
MIR616
AL034418.1
RPL23AP37
AC002128.1
AC099850.1
LINC00624
GS1-124K5.4
PAG1
AL645939.2
TGFBR3
ATP6V1C2
IPO4
FES
AL442128.1
AC024558.1
SNHG28
AC005329.3
AC105118.1
FCRLA
UTAT33
AL513320.1
LRRC4B
FAM53A
USP17L2
AL592211.1
C10orf111
AL138781.2
AL591767.3
AC010336.5
AC009554.2
AL450263.1
HIST2H2AC
DISP3
AC036176.1
AL138724.1
AC009065.2
AP001107.1
NUP210L
AC005840.4
CHST8
AL590763.1
AL021878.2
AL031055.1
FCAMR
CYP51A1-AS1
AC011330.1
CDCA4P4
HIST1H3J
AC016866.3
MIR6784
AC093110.1
HSPE1P5
AL691403.2
NDFIP2-AS1
CASC19
CALM2P2
AC069547.1
WDR86
GJC1
AL807776.1
DLG1-AS1
AC008897.3
MUC12
SNORA77
ENO1-AS1
NPPC
WWTR1-AS1
AC110285.7
HOXA11
ANPEP
AC025031.2
AP003071.5
AL662797.1
AC025580.2
OGFOD2
AL157838.1
AC010894.2
AC132872.3
AC011742.3
DAGLA
CARNS1
HIST1H2BI
LTA
PPIAP40
AL132780.1
TEX52
PTPRVP
RUNDC3A-AS1
C10orf25
STX1B
PAXIP1-AS2
KRT34
HIST1H4J
AL355607.2
HIST1H2AH
RNU6-890P
AC138207.2
SNORD59A
AC007406.5
RPS26P6
AC010359.1
AC068870.1
Z83844.2
DCHS1
NCBP2L
AC112484.3
MATN4
AC034231.1
FRG2B
AL590762.4
MKNK1-AS1
C11orf42
FAM27B
AC141586.5
AL021707.2
C1QTNF1
AL355987.4
AC004264.2
LPP-AS2
AC069257.2
AC009090.3
RPL5P30
AL162741.1
AC024243.1
LINC02257
AL117339.5
AC021087.2
AC087163.3
AC022400.1
PAN3-AS1
PRR15L
AC022762.2
AC002558.3
WNT5A
AC098818.2
AL450306.1
LINC00612
AL132642.1
BBS1
RNA5SP323
PRSS41
AL355001.2
AC020922.4
LINC00452
LINC00528
FAM166A
AL031847.1
ST7-OT4
TMEM92
AC005593.1
ELOCP21
FFAR2
MIR548L
AC007342.7
FDXACB1
AL050343.1
AC005520.5
AC090589.3
LINC00052
AC109460.2
AP003392.1
WNK2
SPAG5-AS1
AC008870.2
AC063976.2
C6orf201
AC015660.2
F8A2
KRTAP4-12
IDI2
AC120498.4
AC093495.1
AC100757.1
RNU6-8
AC009065.8
AC130651.1
ATF4P3
AC069542.1
EFCAB14-AS1
AC010271.1
AC090695.1
ADRB1
ZNF585A
AL031717.1
MIR378A
AC019077.1
AC025569.1
AC040162.3
ATP5PDP4
HSPD1P11
USP3-AS1
Z84485.1
AC087392.4
LINC01293
AL512408.1
Z92544.1
AC090517.5
PSG2
CCDC12
ZC3H11B
LINC00663
AC022211.3
AC115989.1
SMIM22
AL133243.2
AC062029.1
AC138932.5
RF00156
MTND5P28
AC068473.1
AC005104.1
FAM19A2
SNORA65
RNY4P10
DNAI1
ARAP1-AS2
AC004837.2
MFSD1P1
AC011462.4
KRT17P1
DLEU2L
SNORA33
AL358472.4
AC129492.6
AC093525.9
GPX1P1
AL359232.1
AC009549.1
PRR20G
SCN2B
AC073367.1
AL391845.1
AC020911.1
AC090236.2
CARS-AS1
ZNF485
AC016722.2
AL359715.2
C8G
AC016586.1
AL008718.3
AC011476.3
AC026803.2
AC010768.2
ATP1B3-AS1
ZNF141
AC010186.3
AC026367.1
AC004584.3
NDUFA9P1
AP001469.1
MIR7-3HG
ADNP-AS1
AC021106.1
LINC00702
AC022211.1
AL356481.3
ZNF295-AS1
AP003555.2
RNU1-103P
ARNTL2-AS1
AC080038.3
AC246785.2
DLGAP3
AL157756.1
AL590762.1
AL845472.2
AL358472.2
AL109811.2
AC008897.2
BX119927.1
AC098935.1
PARP1P1
HIST1H3G
AC005264.1
LEXM
AC006449.3
AL031709.1
UXT-AS1
SCAANT1
CYP2D8P
AC023818.1
MRGPRF
PABPC4L
AC241584.1
AC063965.1
CCL4
LCMT1-AS2
GPIHBP1
MORF4L2-AS1
DTX2P1
AC073072.1
AC099343.3
PRSS57
AC023137.1
AL139289.1
C1QBPP2
AC007663.4
FOXP4-AS1
NODAL
AC138956.2
ALKBH3-AS1
AC022165.1
OTOP2
AC007773.1
CEBPE
AC007240.2
AC022167.4
AL445435.1
LINC01715
PABPC1P3
AL627309.5
AC002553.1
LINC02579
AL049796.1
UNC79
AC002470.1
NECTIN3
TPI1P2
RPL10P13
AC104564.3
CYP2A6
AC020907.4
AC116903.2
PHBP9
ZDHHC20-IT1
AC020558.2
AC069224.1
AP000561.1
AL137002.2
AC084026.2
LRRC43
AC004846.1
RN7SL336P
AKR7L
AC073349.2
LINC01547
POLH-AS1
AL035448.1
FAM181A-AS1
RN7SKP296
AL451139.1
NHLH1
AC012170.2
SNORA16B
PSG10P
AC011753.4
KRT87P
SLC7A11-AS1
AC090607.1
SENCR
AC020978.1
DUSP8P3
AC100830.2
AP003119.2
AC021945.1
NSFP1
AP003108.5
AL356235.1
RNA5SP18
RN7SL608P
RELN
AC007032.1
AL049597.2
AC005225.3
AC114495.2
AC109587.1
AC009779.2
KRTAP3-2
AC245060.2
AC108047.1
SUSD3
AL117209.1
DSCAS
AL354740.1
SNORA11
AC131009.4
HIST1H4C
NWD2
YEATS2-AS1
DDX39B-AS1
TCERG1L-AS1
PP2D1
TADA1
AL021155.2
AC079684.1
AL021396.1
BRWD1-AS2
AC004039.1
AC012158.1
TRPV2
AC010240.3
AL136985.2
HOXC5
AL139124.1
AC079907.1
NME9
IL19
AC006511.3
ACKR4
ERICH6B
AC073332.1
CMTM1
AC003072.1
AC021549.1
AC022532.1
AC005332.3
RND1
MIR3175
AC008764.2
AC106028.4
AL031432.5
MIR7111
AL121990.1
AC002066.1
AC109460.3
AMZ1
AC084809.1
MIR3197
FAM222B
CNN1
PSD2
RHOT1P2
CCDC116
RYKP1
SPDYA
VWA3A
AL034346.1
RF00322
AL031316.1
PRR13P2
AL139095.5
CSPG4P11
ERVW-1
BDNF
CGB5
AL034376.1
HIST1H2AL
RPL23AP64
CCDC96
LINC01714
RAP1AP
PPIAP3
RPL12P14
AC067852.3
AC023593.1
AC097359.1
AC243829.1
AP003096.1
AC008966.2
AC092614.1
HSD3BP5
RF00015
AC007950.2
RGL4
PAIP1P1
LINC01132
BARHL1
AP000813.1
AC112484.1
AC139795.1
TTLL11-IT1
SEMA3G
LINC00540
RPL36AP43
LINC02019
AC124016.1
SMTNL1
LINC00539
BMS1P4
KLHL7-DT
EPPIN
RN7SL481P
AL356512.1
AC113346.1
GTF2H4
ITGAM
LINC02313
AL355075.2
AL162274.3
AC005790.1
RF00404
GRM2
AC137723.2
AC024075.3
BX255923.1
AL122035.2
AC073592.10
RN7SL81P
SDK2
ACTG1P10
SMIM10L2B
PLA2G3
AC004492.1
ZNF439
RN7SL535P
AL118558.2
CNTN4
AL354892.3
AP001107.4
SLC12A9-AS1
RHOA-IT1
AC011498.6
AC007098.1
AC130686.1
AC098851.1
ZBTB32
AC006960.2
SFTPD
ASCL5
LINC00881
NPBWR1
AP001931.1
TSSK3
AC091516.1
AL049712.1
KRTAP21-2
CGB8
AC107294.3
MPL
SEMG1
GPRIN3
CYGB
SNRPGP4
SPNS1
AC132219.2
AC051619.8
C1QTNF9B
MARCKSL1P2
AC024940.2
USP46-AS1
PPIAP53
AP000811.1
AC079922.1
AL353803.4
ADAMTS7P4
AC046143.1
RIMKLBP1
C2CD4A
ZNF695
AP003170.1
LINC01910
AC006486.2
AC091057.4
KRR1P1
RAB42
STARD4-AS1
AC017002.3
AC002454.1
LINC01816
HLA-DQA2
OCLM
MIR659
AC004466.1
AL034550.1
AC092301.1
LINC00102
HNF1B
AC018682.1
MYPN
AC098934.4
SLC22A11
PKD2L2
C6orf52
AL139156.2
LINC02574
AC106886.4
AC126696.3
CXCL10
RBM20
AC006277.1
AC008537.2
AC233992.2
MSL3P1
AC027544.2
AL590705.3
AC098850.1
ZNF346-IT1
RNU6-1285P
AC006116.8
MIR590
C6orf15
AP001160.3
GTF2IP12
AC023157.2
TCERG1L
SLC17A9
AL049840.5
AC112236.2
Z98752.2
ANKRD20A3
DDIT4L
AC004466.3
ACTBP7
PFN1P4
AL136162.1
CCSER1
ZNF441
AC006238.1
AC012447.1
SERPINA3
RNU6-1238P
AC011825.2
AC023906.5
AC007906.2
PWP2
AC148477.4
AC040160.1
STPG3-AS1
AC245060.6
SOAT2
NPIPB9
PPP5D1
GLI2
AC108727.1
AL133406.2
DNAI2
AC015853.1
GPD1
RN7SKP269
AL161772.1
TEX54
LINC01394
ENPP7P4
STPG3
PFN1P2
GALNT9
AC100812.1
C2orf40
AC124283.4
AC024075.1
AF127577.5
AL158163.1
AL356481.2
AC007786.1
SNORD62B
AL591485.1
AL513343.1
MIR5685
AL359710.1
WDR97
MCFD2P1
ST6GALNAC6
AC084033.3
MACC1-AS1
AC025166.1
FGF9
AC074050.2
AC073130.2
AL117187.1
PKP4-AS1
AC022400.8
Z83843.1
AL031864.1
S1PR2
AC016727.3
AP000692.1
AC020658.6
AL358472.1
AC012170.3
LINC01655
DACT3-AS1
FGL2
AL049629.2
AL358472.5
AC093788.1
AC026740.1
IL6R-AS1
AIM2
AL138885.2
CCDC62
FRG2
AC004947.1
ATP12A
AC087222.1
AC005089.1
RPL4P6
AL645924.2
AL136454.1
OR7E47P
AC091868.2
AL355102.4
AL136301.1
AC145285.5
ZBED9
AC130343.2
AC104564.5
AC009502.1
EFHB
AL020997.2
PCDH10
AL356488.1
AL121601.1
AC100847.1
THPO
C1orf194
AC124283.2
PFN1P6
HNRNPCP4
AL359844.1
LINC00322
HIST1H2BL
AC005838.2
AL033397.1
RNU6-1223P
LCE1B
CDRT4
AC087257.2
MTDHP1
BMS1P2
AF111167.1
MRPS31P5
AC012485.1
PLA2G4D
AC020900.1
AC018761.3
GDF9
MRVI1-AS1
RNU6-850P
AMPD1
CHST6
AC005696.3
AL121983.1
AC013701.1
AC008735.2
AL354751.3
GNAT1
AC104819.3
MIR3687-2
AP005329.1
AC027307.1
PSMD10P1
AL049840.3
AL022238.1
AL021707.4
LAG3
AC010531.6
LINC00880
KLLN
Z98884.1
SUGT1P2
AC018628.1
AC012555.1
NKX2-1-AS1
KCNIP2
AKAP5
HIF1A-AS2
LINC02361
CNBD2
AL031665.2
AC003070.1
RPL7AP10
AC073333.1
AL391650.1
AC233992.3
MIRLET7D
AC055720.2
RNA5SP155
LINC02289
AC016747.4
ART5
UMODL1
FSD2
MIR23B
MIR6859-1
AC117503.4
AC007566.1
ST3GAL5-AS1
MAGI1-IT1
HIST1H2AB
DDT
RASGRP1
AC013472.3
ATP6V0CP1
AC009309.1
AC092807.3
MIR936
AC127024.4
SHC3
SCHIP1
ZNF572
HPD
UPK1B
SVIL2P
AC136621.1
CD300A
CPNE6
TMPRSS11A
AC064801.2
CPXM2
SLC16A4
AL049552.1
METTL21EP
SIRPB1
AC073476.1
AL031283.1
AC009403.1
LRRC17
AC027277.2
UPK3BP1
SNORA54
AC092849.1
AC016949.1
WWC2-AS2
OACYLP
TEX29
LINC01647
AL035446.1
AL592166.1
SNORD117
AC139887.4
RNA5SP37
HMGN1P8
ACTA1
IGSF6
MIR6730
ITGAX
AL359711.2
AL596223.1
HAS1
AL109806.1
AC015726.2
AC100835.1
[truncated: 22 more rows]
