# Supplementary material for: Ferulic acid in synergy with retinol alleviates oxidative injury of HaCaT cells during UVB-induced photoaging
Source: Aging (Albany NY). 2024 Apr 18;16(8):7153–73. doi: 10.18632/aging.205749 (PMC11087097; doi:10.18632/aging.205749)
Supplement: Supplementary Table 8 [file aging-16-205749-s008.xlsx]

## Sheet: Sheet1
Supplementary Table 8. 155 genes in the co-administration group, normal group and model group had distinct differences in gene expression.
	gene_id	Control_1	Control_2	Control_3	Control_4	Model_1	Model_2	Model_3	Model_4	VA_FA_1	VA_FA_2	VA_FA_3	VA_FA_4	VA_1	VA_2	VA_3	VA_4	groupx	group2	log2FoldChange	pvalue	padj	gene_name
IL6	ENSG00000136244	13.7045	23.8358	13.6479	17.6676	988.351	1438.66	1211.92	1237.66									17.2139	1219.15	-6.1482	1.02812e-177	2.29291e-173	IL6
CXCL1	ENSG00000163739	137.902	97.0456	77.873	138.816	2643.73	3329.54	2632.12	3117.06									112.909	2930.61	-4.69925	1.19792e-170	1.3358e-166	CXCL1
TXNIP	ENSG00000265972	17600	17180.5	13545.1	14888.7	1318.15	936.184	814.814	1019.92									15803.6	1022.27	3.94976	2.53369e-156	1.13013e-152	TXNIP
C11orf68	ENSG00000175573	605.568	508.212	634.224	636.873	5020.23	7949.63	6559.71	5873.13									596.219	6350.67	-3.41271	1.54588e-122	3.83068e-119	C11orf68
ZNHIT2	ENSG00000174276	51.3919	48.5228	61.0139	65.6223	495.236	636.023	660.319	647.477									56.6377	609.764	-3.42663	6.23936e-93	6.95751e-90	ZNHIT2
TNFRSF12A	ENSG00000006327	835.118	704.857	733.773	837.105	3905.68	5906.69	5058.25	4865.82									777.713	4934.11	-2.66532	2.62506e-87	2.5454e-84	TNFRSF12A
MYD88	ENSG00000172936	647.538	692.088	688.815	715.115	2965.05	4286.88	3837.18	3621.29									685.889	3677.6	-2.42238	5.48656e-84	4.7062e-81	MYD88
MRPS24	ENSG00000062582	26.5525	22.9845	24.8873	29.4459	357.376	573.876	536.724	405.676									25.9675	468.413	-4.17168	1.50003e-82	1.15357e-79	MRPS24
PIK3C2B	ENSG00000133056	1110.92	1256.48	973.814	1112.21	214.213	171.898	192.259	170.751									1113.36	187.28	2.56899	3.38885e-80	2.36182e-77	PIK3C2B
EPB41	ENSG00000159023	806.853	858.938	693.632	685.669	123.014	115.04	112.151	96.2621									761.273	111.617	2.7692	9.73103e-78	6.20061e-75	EPB41
HNRNPAB	ENSG00000197451	971.307	860.641	1005.12	916.189	3357.42	3239.62	3095.61	3364.59									938.315	3264.31	-1.79856	6.17372e-76	3.62332e-73	HNRNPAB
CAVIN3	ENSG00000170955	597.002	456.284	560.365	576.299	2659.64	3546.39	2682.48	2781.29									547.488	2917.45	-2.41342	1.35291e-73	7.18396e-71	CAVIN3
PPIF	ENSG00000108179	1254.82	1034.3	1108.69	1071.83	3900.38	4957.28	5163.54	4848.63									1117.41	4717.46	-2.07775	8.86824e-68	4.12041e-65	PPIF
FAM214B	ENSG00000005238	628.694	561.843	484.9	668.843	96.5021	89.916	78.9637	84.8023									586.07	87.546	2.74214	4.84875e-64	1.89714e-61	FAM214B
FBXO32	ENSG00000156804	585.011	722.734	692.026	812.707	88.0184	83.3045	85.8301	127.203									703.12	96.0891	2.86969	1.0668e-63	4.03249e-61	FBXO32
SERTAD1	ENSG00000197019	345.182	326.039	227.197	402.147	2068.96	3933.83	3049.83	2832.85									325.141	2971.37	-3.19208	2.68117e-62	9.34304e-60	SERTAD1
IER5L	ENSG00000188483	263.812	253.681	244.859	275.109	1368	2360.3	1641.07	1471.43									259.365	1710.2	-2.7205	1.36633e-61	4.54805e-59	IER5L
CREB5	ENSG00000146592	6.85225	0.851277	3.21126	10.0957	222.697	378.176	259.779	305.976									5.25263	291.657	-5.79714	7.82287e-59	2.35764e-56	CREB5
CHAC1	ENSG00000128965	9.42185	15.323	16.8591	3.36525	858.974	1429.4	898.355	908.76									11.2423	1023.87	-6.50577	2.50748e-56	6.14525e-54	CHAC1
PHF21A	ENSG00000135365	940.472	1053.03	1016.36	989.383	254.511	309.417	273.512	245.239									999.812	270.67	1.88769	1.87711e-55	4.18634e-53	PHF21A
PTGS2	ENSG00000073756	444.54	578.017	386.957	441.689	2362.71	3391.68	2280.79	2337.79									462.801	2593.24	-2.48619	1.3127e-54	2.78817e-52	PTGS2
CDK5RAP3	ENSG00000108465	632.977	609.514	607.731	577.981	127.255	80.6599	125.884	82.5103									607.051	104.077	2.53763	6.32609e-54	1.31855e-51	CDK5RAP3
LGR4	ENSG00000205213	1458.67	1715.32	1202.62	1415.09	241.785	112.395	215.147	205.13									1447.92	193.614	2.89787	7.1613e-54	1.45192e-51	LGR4
AKAP13	ENSG00000170776	2603.86	3367.65	2435.74	2820.08	775.198	782.798	780.482	704.776									2806.83	760.813	1.88338	1.01747e-52	1.89098e-50	AKAP13
ARHGEF3	ENSG00000163947	641.542	726.991	543.506	609.11	138.921	97.8498	117.873	131.787									630.287	121.608	2.36866	4.54798e-52	7.80224e-50	ARHGEF3
MAFB	ENSG00000204103	566.167	645.268	564.379	665.478	2324.53	3162.93	2238.45	2310.29									610.323	2509.05	-2.03914	2.91587e-51	4.88945e-49	MAFB
NIP7	ENSG00000132603	227.837	233.25	240.844	247.346	785.802	729.906	842.279	834.271									237.319	798.065	-1.75004	3.93383e-51	6.49868e-49	NIP7
SF3B4	ENSG00000143368	1349.89	1148.37	1238.74	1335.16	3522.86	4300.1	4559.29	4617.14									1268.04	4249.85	-1.74472	6.40262e-50	1.00557e-47	SF3B4
AC004130.1	ENSG00000271133	14.561	17.8768	12.0422	17.6676	218.455	214.212	157.927	201.692									15.5369	198.072	-3.6746	1.28981e-49	1.97023e-47	AC004130.1
CXXC5	ENSG00000171604	1096.36	1005.36	933.674	1194.66	250.269	153.386	224.303	247.531									1057.51	218.872	2.26835	8.56399e-48	1.20122e-45	CXXC5
SUSD6	ENSG00000100647	3502.36	3556.64	2353.85	3262.61	529.171	292.227	583.645	528.295									3168.86	483.334	2.71118	5.95037e-47	7.80619e-45	SUSD6
RAPGEF5	ENSG00000136237	1017.56	1550.18	1296.55	1251.03	300.111	222.145	290.678	299.1									1278.83	278.009	2.19942	8.6861e-47	1.12626e-44	RAPGEF5
TUBB2A	ENSG00000137267	524.197	551.627	432.717	599.855	1756.13	2573.18	2557.74	2196.84									527.099	2270.97	-2.10706	3.73328e-46	4.75769e-44	TUBB2A
SLPI	ENSG00000124107	1846.68	1161.99	1286.91	1346.94	5513.34	7107.33	5525.17	6466.75									1410.63	6153.15	-2.12496	8.09072e-46	1.00804e-43	SLPI
AC079305.1	ENSG00000222043	8.56531	2.55383	2.40844	3.36525	143.162	276.359	183.104	209.714									4.22321	203.085	-5.59461	7.25325e-45	8.55883e-43	AC079305.1
MEPCE	ENSG00000146834	407.709	462.243	666.336	557.79	1997.91	2225.42	2476.48	2235.8									523.52	2233.9	-2.09272	1.38962e-44	1.60577e-42	MEPCE
HECA	ENSG00000112406	769.165	831.698	569.999	761.387	181.339	120.329	135.039	120.328									733.062	139.259	2.39192	2.78559e-44	3.18586e-42	HECA
TENT5B	ENSG00000158246	2327.2	1956.23	1286.11	2513.84	328.743	417.845	337.598	320.874									2020.85	351.265	2.52542	2.52496e-43	2.65621e-41	TENT5B
EGR3	ENSG00000179388	145.61	262.193	164.577	265.855	1140	1412.21	1352.68	1070.34									209.559	1243.81	-2.56936	4.52788e-43	4.59003e-41	EGR3
MID1IP1	ENSG00000165175	5392.72	4459.84	4034.14	5360.84	1400.87	1408.24	1603.31	1578.01									4811.89	1497.61	1.68382	1.0057e-42	1.0013e-40	MID1IP1
KLF9	ENSG00000119138	335.76	363.495	211.14	346.621	36.0557	19.8344	32.0432	13.7517									314.254	25.4213	3.61559	1.09648e-42	1.08683e-40	KLF9
DNMBP	ENSG00000107554	1274.52	1425.04	862.223	1224.95	289.506	219.501	273.512	228.049									1196.68	252.642	2.2419	4.7662e-42	4.52322e-40	DNMBP
MN1	ENSG00000169184	1292.51	1459.09	1198.6	1385.64	355.255	183.799	312.422	278.472									1333.96	282.487	2.2357	6.45265e-41	5.73334e-39	MN1
SRGAP2	ENSG00000266028	1289.94	1448.02	1143.21	1337.69	441.152	474.704	400.54	403.384									1304.71	429.945	1.60227	3.33047e-40	2.72074e-38	SRGAP2
TIMM8B	ENSG00000150779	292.077	260.491	242.45	273.426	725.356	784.12	780.482	836.563									267.111	781.63	-1.54925	1.09563e-38	8.25494e-37	TIMM8B
REV1	ENSG00000135945	771.735	849.574	630.21	701.654	202.548	133.552	201.415	167.313									738.293	176.207	2.06259	1.22767e-38	9.21868e-37	REV1
RRP9	ENSG00000114767	278.373	249.424	289.013	256.6	738.082	840.979	975.03	963.767									268.353	879.464	-1.7121	2.43879e-38	1.78914e-36	RRP9
PRSS8	ENSG00000052344	3499.79	2259.29	1745.32	2589.56	481.45	376.854	536.724	516.836									2523.49	477.966	2.39953	2.94669e-38	2.14762e-36	PRSS8
RNF19B	ENSG00000116514	2854.82	2571.71	1916.32	2563.48	441.152	288.26	600.811	516.836									2476.58	461.765	2.42168	3.75608e-38	2.7286e-36	RNF19B
MRPL57	ENSG00000173141	296.36	230.696	270.549	264.172	782.621	896.515	759.882	907.614									265.444	836.658	-1.65568	4.88515e-38	3.49194e-36	MRPL57
TSSC4	ENSG00000184281	413.705	314.972	507.379	380.273	1337.24	1531.22	1861.94	1707.51									404.082	1609.48	-1.99338	1.36493e-37	9.51269e-36	TSSC4
ARL8A	ENSG00000143862	1658.24	1587.63	1310.19	1814.71	364.799	304.128	481.793	448.077									1592.7	399.699	1.99314	1.50609e-37	1.04638e-35	ARL8A
FSTL3	ENSG00000070404	1030.41	955.133	1152.84	1241.78	3319.25	5644.87	4538.7	3904.34									1095.04	4351.79	-1.99031	4.45807e-37	3.00374e-35	FSTL3
EIF5	ENSG00000100664	782.013	972.158	1635.33	890.108	5748.77	4971.83	5594.98	5436.51									1069.9	5438.02	-2.34538	6.40888e-37	4.26659e-35	EIF5
EMSY	ENSG00000158636	635.546	759.339	610.942	598.173	214.213	167.931	180.815	193.67									651	189.158	1.78022	1.25085e-36	8.10946e-35	EMSY
DUSP16	ENSG00000111266	268.951	298.798	262.52	244.822	53.0231	54.2141	37.7652	61.8828									268.773	51.7213	2.37842	4.39696e-36	2.77008e-34	DUSP16
RTN4R	ENSG00000040608	491.649	357.536	354.844	426.545	94.3811	68.7593	84.6857	99.7									407.644	86.8815	2.22501	4.55372e-36	2.86076e-34	RTN4R
RFFL	ENSG00000092871	598.715	687.832	466.435	606.586	166.493	142.808	159.072	132.933									589.892	150.326	1.97046	7.71857e-36	4.80837e-34	RFFL
STC2	ENSG00000113739	319.486	345.618	491.323	369.336	1267.25	1342.13	1607.88	1298.39									381.441	1378.91	-1.85335	9.77427e-36	6.03839e-34	STC2
KHDC4	ENSG00000132680	2322.06	2033.7	1429.01	1792.84	516.445	552.719	561.901	488.186									1894.4	529.813	1.83836	1.56138e-35	9.48829e-34	KHDC4
PPTC7	ENSG00000196850	2747.75	3005.01	1610.45	2527.3	608.705	478.67	619.121	544.339									2472.63	562.709	2.13477	3.54748e-35	2.08199e-33	PPTC7
SEC24B	ENSG00000138802	653.533	707.411	586.055	598.173	182.399	117.684	188.826	176.48									636.293	166.348	1.93053	3.66061e-35	2.14275e-33	SEC24B
INTS5	ENSG00000185085	255.246	279.219	366.886	311.285	955.476	1085.6	1433.93	1133.37									303.159	1152.1	-1.9255	3.75957e-35	2.19492e-33	INTS5
C16orf91	ENSG00000174109	263.812	190.686	211.943	224.63	670.212	1034.03	942.987	823.957									222.768	867.798	-1.96107	5.38704e-35	3.09643e-33	C16orf91
TMEM150A	ENSG00000168890	97.6446	91.9379	122.028	89.1791	359.497	384.788	497.815	417.136									100.197	414.809	-2.04846	6.08082e-35	3.47729e-33	TMEM150A
PTK2B	ENSG00000120899	1311.35	1442.91	1380.04	1566.52	411.459	495.86	521.847	559.237									1425.21	497.101	1.52022	3.46648e-34	1.8995e-32	PTK2B
JMY	ENSG00000152409	392.291	522.684	369.295	430.752	121.953	78.0154	82.3969	84.8023									428.756	91.7919	2.21786	9.55014e-34	5.09539e-32	JMY
RNF169	ENSG00000166439	336.617	464.797	287.408	347.462	67.8696	43.6357	76.6749	71.0506									359.071	64.8077	2.46293	5.44735e-33	2.71783e-31	RNF169
EDN1	ENSG00000078401	17.9872	21.2819	23.2816	27.7633	148.465	175.865	148.772	139.809									22.5785	153.228	-2.75967	7.06195e-33	3.5077e-31	EDN1
LYN	ENSG00000254087	1004.71	1067.5	926.448	926.285	382.827	302.805	315.855	382.756									981.236	346.061	1.50156	1.14853e-32	5.62957e-31	LYN
FAM110C	ENSG00000184731	567.024	818.928	540.294	731.1	191.944	169.254	159.072	163.875									664.337	171.036	1.95654	1.19622e-32	5.85048e-31	FAM110C
RICTOR	ENSG00000164327	820.557	1165.4	627.801	758.863	219.516	153.386	171.66	153.561									843.155	174.531	2.26979	1.88142e-32	9.08211e-31	RICTOR
UBE2H	ENSG00000186591	4756.32	5182.57	3949.85	4914.1	1877.02	1703.11	1351.54	1471.43									4700.71	1600.78	1.55403	3.89966e-32	1.83481e-30	UBE2H
NR4A3	ENSG00000119508	11.9914	16.1743	25.6901	29.4459	135.739	238.013	216.292	184.502									20.8254	193.637	-3.21121	4.49565e-32	2.10635e-30	NR4A3
LGALS7B	ENSG00000178934	861.671	793.39	833.322	968.35	2632.07	4437.62	2708.8	3001.31									864.183	3194.95	-1.88601	6.42237e-32	2.98399e-30	LGALS7B
DNAJB1	ENSG00000132002	9811.57	9313.82	5631.75	10056.2	2445.43	2206.91	2514.25	2336.65									8703.33	2375.81	1.87303	1.25077e-31	5.70445e-30	DNAJB1
CCDC186	ENSG00000165813	522.484	653.781	394.182	542.646	141.041	78.0154	113.296	88.2402									528.273	105.148	2.32276	4.16526e-31	1.84313e-29	CCDC186
LINC02551	ENSG00000254842	1.71306	11.9179	8.02815	6.7305	117.711	158.675	89.2633	135.225									7.0974	125.219	-4.13599	4.73238e-31	2.08169e-29	LINC02551
STK17B	ENSG00000081320	597.859	604.407	331.563	513.2	99.6834	66.1147	107.574	105.43									511.757	94.7004	2.42917	5.3066e-31	2.3251e-29	STK17B
NCOA7	ENSG00000111912	3249.68	3923.54	2235.04	3304.67	971.383	885.937	942.987	974.08									3178.23	943.597	1.75168	6.88155e-31	2.97427e-29	NCOA7
RNF38	ENSG00000137075	412.848	483.525	264.126	349.986	63.6277	38.3465	68.6641	76.7805									377.621	61.8547	2.6028	8.11349e-31	3.48646e-29	RNF38
TNK1	ENSG00000174292	208.137	254.532	371.703	281.84	887.607	1090.89	1068.87	1096.7									279.053	1036.02	-1.89129	8.83386e-31	3.77419e-29	TNK1
PI4K2A	ENSG00000155252	1974.3	1660.84	1376.02	1794.52	588.556	507.761	645.442	571.842									1701.42	578.401	1.5557	1.22829e-30	5.18812e-29	PI4K2A
ARID4B	ENSG00000054267	376.017	532.048	362.07	396.258	120.893	83.3045	76.6749	92.8241									416.598	93.4241	2.15227	2.60047e-30	1.07599e-28	ARID4B
RSF1	ENSG00000048649	771.735	995.143	746.618	823.644	307.534	234.046	225.447	278.472									834.285	261.375	1.67228	6.60765e-30	2.6648e-28	RSF1
AL162458.1	ENSG00000285796	8.56531	2.55383	8.02815	5.88918	120.893	96.5275	127.029	81.3644									6.25912	106.453	-4.08608	6.85851e-30	2.76098e-28	AL162458.1
TMEM161B	ENSG00000164180	348.608	366.049	268.943	280.998	89.0788	55.5364	58.3645	72.1965									316.15	68.794	2.19288	1.50414e-29	5.82384e-28	TMEM161B
DHRS9	ENSG00000073737	23.9829	28.0921	21.676	29.4459	214.213	112.395	222.014	212.006									25.7992	190.157	-2.88604	1.62147e-29	6.24559e-28	DHRS9
NCOA2	ENSG00000140396	169.593	170.255	165.38	172.469	37.1162	34.3796	30.8988	27.5034									169.424	32.4745	2.38256	3.53322e-29	1.33783e-27	NCOA2
TRMT6	ENSG00000089195	225.268	238.358	256.901	251.552	961.839	584.454	976.174	976.372									243.02	874.71	-1.84863	6.27611e-29	2.32508e-27	TRMT6
MAP3K5	ENSG00000197442	327.195	329.444	315.506	318.016	88.0184	116.362	82.3969	73.3425									322.54	90.0299	1.84747	9.21085e-29	3.33475e-27	MAP3K5
GNA13	ENSG00000120063	1149.47	1234.35	784.35	1022.19	243.906	108.428	254.057	208.568									1047.59	203.74	2.35835	9.3381e-29	3.36443e-27	GNA13
FCHSD2	ENSG00000137478	716.917	803.605	599.703	711.75	261.934	267.103	217.436	213.152									707.994	239.906	1.56187	2.78184e-28	9.77016e-27	FCHSD2
PHF13	ENSG00000116273	1910.92	1694.04	1040.45	1543.81	331.925	162.642	360.486	325.457									1547.3	295.128	2.38792	3.10666e-28	1.08767e-26	PHF13
CDYL	ENSG00000153046	513.919	546.52	511.393	482.072	195.125	133.552	186.537	169.605									513.476	171.205	1.5799	6.3476e-28	2.16128e-26	CDYL
ARL5B	ENSG00000165997	1072.38	1139.86	574.013	811.866	246.027	171.898	161.361	171.897									899.529	187.796	2.25798	6.46913e-28	2.19931e-26	ARL5B
TMCC1	ENSG00000172765	338.33	394.993	346.816	399.623	123.014	63.4701	96.1297	84.8023									369.94	91.8539	2.00125	1.0494e-27	3.49832e-26	TMCC1
BICRAL	ENSG00000112624	156.745	183.876	157.352	171.628	36.0557	14.5452	30.8988	25.2115									167.4	26.6778	2.63049	1.15636e-27	3.83197e-26	BICRAL
MBIP	ENSG00000151332	333.191	410.316	301.858	314.651	88.0184	55.5364	88.1189	97.408									340.004	82.2704	2.04012	1.2821e-27	4.23605e-26	MBIP
KLF12	ENSG00000118922	202.141	274.111	172.605	205.28	48.7813	25.1236	32.0432	36.6713									213.534	35.6548	2.5698	1.60598e-27	5.25171e-26	KLF12
ATP8B1	ENSG00000081923	1213.71	1573.16	1135.98	1364.61	487.813	498.505	449.75	364.421									1321.86	450.122	1.55454	1.61483e-27	5.27292e-26	ATP8B1
ATF2	ENSG00000115966	543.897	590.786	443.154	507.311	198.306	152.064	143.05	155.853									521.287	162.318	1.68039	1.6311e-27	5.31824e-26	ATF2
C18orf25	ENSG00000152242	1395.29	1551.03	846.167	1245.98	377.525	247.269	322.721	335.771									1259.62	320.821	1.97113	3.25394e-27	1.03228e-25	C18orf25
CLDN6	ENSG00000184697	1.71306	0	0.802815	2.52394	97.5625	195.7	178.527	134.079									1.25995	151.467	-6.91049	4.20662e-27	1.31211e-25	CLDN6
AIMP2	ENSG00000106305	286.938	222.183	362.872	269.22	872.76	798.666	1079.17	1023.36									285.303	943.488	-1.72521	4.64873e-27	1.44396e-25	AIMP2
FRK	ENSG00000111816	674.947	899.8	618.167	794.199	222.697	101.817	161.361	192.524									746.778	169.6	2.13345	6.46414e-27	1.99396e-25	FRK
PNPLA3	ENSG00000100344	185.867	225.588	166.986	200.232	34.9953	37.0242	49.2093	42.4011									194.668	40.9075	2.2497	7.67831e-27	2.34578e-25	PNPLA3
AMH	ENSG00000104899	4.28266	5.10766	15.2535	2.52394	103.925	216.856	165.938	90.5322									6.79193	144.313	-4.39289	8.00031e-27	2.43747e-25	AMH
LINC01089	ENSG00000212694	61.6703	53.6305	118.014	58.0505	346.771	527.595	553.89	343.793									72.8413	443.012	-2.60138	1.12148e-26	3.39367e-25	LINC01089
LRIG2	ENSG00000198799	515.632	544.817	346.816	456.832	112.409	31.7351	64.0865	77.9264									466.024	71.5392	2.69279	1.32099e-26	3.9651e-25	LRIG2
CSPG4P10	ENSG00000276710	151.606	267.301	281.788	299.507	39.2371	43.6357	48.0649	40.1092									250.051	42.7617	2.54951	1.36633e-26	4.09568e-25	CSPG4P10
POLR2L	ENSG00000177700	753.748	641.863	612.548	832.899	1691.44	2201.62	2141.17	2677									710.264	2177.81	-1.61641	1.45436e-26	4.34787e-25	POLR2L
SEC24A	ENSG00000113615	460.814	458.838	426.295	378.59	146.344	100.494	127.029	154.707									431.134	132.143	1.70107	1.81425e-26	5.39484e-25	SEC24A
CASC8	ENSG00000246228	11.1349	6.81022	9.63378	5.04787	74.2324	115.04	94.9853	97.408									8.15669	95.4163	-3.54387	2.78068e-26	8.1171e-25	CASC8
MRTO4	ENSG00000053372	332.334	282.624	410.238	361.764	1128.33	835.69	1163.86	1309.85									346.74	1109.43	-1.67812	3.61016e-26	1.04972e-24	MRTO4
AC022613.2	ENSG00000259523	5.13919	2.55383	4.81689	1.68262	72.1114	91.2383	85.8301	79.0724									3.54813	82.0631	-4.52599	4.73189e-26	1.35644e-24	AC022613.2
MVK	ENSG00000110921	1744.75	1523.79	1373.62	1705.34	449.636	528.918	582.5	683.002									1586.87	561.014	1.50023	5.30576e-26	1.51316e-24	MVK
PNO1	ENSG00000115946	116.488	116.625	96.3378	98.4335	380.706	277.682	410.84	377.026									106.971	361.564	-1.75957	6.06706e-26	1.71928e-24	PNO1
CDK17	ENSG00000059758	363.169	432.449	299.45	346.621	120.893	95.2052	96.1297	105.43									360.422	104.414	1.7839	7.95929e-26	2.22163e-24	CDK17
NFIL3	ENSG00000165030	400.857	436.705	243.253	385.321	69.9905	78.0154	67.5197	103.138									366.534	79.6659	2.20216	1.43479e-25	3.91662e-24	NFIL3
SNRNP48	ENSG00000168566	580.728	655.483	416.661	512.359	172.855	150.742	145.339	181.064									541.308	162.5	1.73433	1.9217e-25	5.17605e-24	SNRNP48
IKZF2	ENSG00000030419	149.893	285.178	196.69	207.804	43.4789	19.8344	27.4656	34.3793									209.891	31.2896	2.73261	2.13507e-25	5.73691e-24	IKZF2
RAB30	ENSG00000137502	334.047	423.085	207.126	309.603	69.9905	27.7682	42.3428	57.2988									318.465	49.3501	2.6788	2.44089e-25	6.48829e-24	RAB30
SPATA13	ENSG00000182957	268.951	308.162	283.394	301.19	91.1997	40.9911	75.5305	52.7149									290.424	65.1091	2.14607	2.66417e-25	7.0482e-24	SPATA13
LNX2	ENSG00000139517	695.504	776.365	414.252	641.08	183.46	119.006	159.072	158.145									631.8	154.921	2.02437	3.5496e-25	9.26968e-24	LNX2
MAP3K14	ENSG00000006062	406.852	424.787	399.802	436.641	113.469	83.3045	155.639	134.079									417.021	121.623	1.77319	3.71301e-25	9.6851e-24	MAP3K14
ARC	ENSG00000198576	15.4176	16.1743	5.6197	19.3502	98.623	128.263	111.007	130.641									14.1404	117.133	-3.05493	3.97734e-25	1.03263e-23	ARC
RALY-AS1	ENSG00000285230	30.8351	22.1332	23.2816	30.2872	148.465	136.196	159.072	113.452									26.6343	139.296	-2.38862	1.29557e-24	3.2356e-23	RALY-AS1
EXOSC4	ENSG00000178896	141.328	129.394	171.802	146.388	399.794	446.935	615.688	658.937									147.228	530.339	-1.8484	1.36728e-24	3.39945e-23	EXOSC4
KCNK5	ENSG00000164626	1190.58	1180.72	704.871	1266.17	214.213	271.07	361.631	260.137									1085.59	276.763	1.97214	1.99159e-24	4.88093e-23	KCNK5
FOXK2	ENSG00000141568	1564.88	1494.84	1340.7	1485.76	530.231	314.706	572.201	495.062									1471.55	478.05	1.62	3.16481e-24	7.61398e-23	FOXK2
GCNT1	ENSG00000187210	413.705	553.33	403.013	522.455	132.558	46.2803	107.574	97.408									473.126	95.955	2.29328	3.43377e-24	8.23441e-23	GCNT1
PEX13	ENSG00000162928	841.114	1064.1	780.336	1049.12	353.134	198.344	284.956	284.202									933.666	280.159	1.7334	3.47997e-24	8.33623e-23	PEX13
HCN3	ENSG00000143630	627.838	638.458	478.478	529.185	167.553	144.13	226.591	143.247									568.49	170.38	1.7364	3.55869e-24	8.51566e-23	HCN3
H1F0	ENSG00000189060	13610.3	12364.8	8352.49	11947.5	4653.31	4281.59	3648.35	3742.76									11568.8	4081.5	1.50303	3.78277e-24	9.02281e-23	H1F0
KIAA1958	ENSG00000165185	123.341	128.543	102.76	149.754	22.2697	14.5452	19.4548	19.4816									126.099	18.9378	2.72422	4.88626e-24	1.15438e-22	KIAA1958
PHF3	ENSG00000118482	898.501	1202	831.716	918.713	394.492	306.772	279.234	335.771									962.733	329.067	1.54732	6.69003e-24	1.55742e-22	PHF3
SEC24D	ENSG00000150961	817.988	786.58	705.674	572.933	254.511	289.582	205.992	217.736									720.794	241.955	1.57651	6.82506e-24	1.58555e-22	SEC24D
TMF1	ENSG00000144747	375.161	440.11	332.365	340.731	130.437	89.916	120.162	122.62									372.092	115.784	1.67899	7.79016e-24	1.80224e-22	TMF1
LPAR3	ENSG00000171517	390.578	393.29	305.872	333.16	131.497	115.04	112.151	90.5322									355.725	112.305	1.66183	2.09479e-23	4.70947e-22	LPAR3
WHAMM	ENSG00000156232	747.752	808.713	705.674	774.848	242.846	120.329	219.725	263.575									759.247	211.619	1.83882	3.11312e-23	6.93593e-22	WHAMM
NCK1	ENSG00000158092	655.247	647.822	500.154	584.712	182.399	70.0816	143.05	160.437									596.983	138.992	2.09629	3.70604e-23	8.17528e-22	NCK1
RAB12	ENSG00000206418	455.675	514.171	341.999	414.767	142.102	62.1478	105.285	104.284									431.653	103.455	2.05304	5.22712e-23	1.13511e-21	RAB12
CEP170	ENSG00000143702	512.206	624.837	483.295	455.991	207.851	193.055	167.083	158.145									519.082	181.533	1.51544	7.27106e-23	1.56373e-21	CEP170
CARMN	ENSG00000249669	11.1349	6.81022	5.6197	1.68262	64.6882	119.006	108.718	75.6345									6.31186	92.0118	-3.86682	7.45075e-23	1.60083e-21	CARMN
AL645608.7	ENSG00000272512	10.2784	8.51277	21.676	10.0957	113.469	146.775	144.195	74.4885									12.6407	119.732	-3.23464	9.02136e-23	1.92346e-21	AL645608.7
TIPARP	ENSG00000163659	6954.18	6082.37	2469.46	4761.83	551.44	477.348	647.731	563.821									5066.96	560.085	3.17722	1.12627e-22	2.38538e-21	TIPARP
AL162377.1	ENSG00000231856	5.99572	3.40511	5.6197	3.36525	55.144	83.3045	66.3753	100.846									4.59645	76.4175	-4.05085	1.46831e-22	3.07187e-21	AL162377.1
ARHGAP5	ENSG00000100852	758.03	1093.04	573.21	760.546	227.999	140.163	242.613	202.838									796.206	203.403	1.96585	1.53452e-22	3.2014e-21	ARHGAP5
ARMC5	ENSG00000140691	65.9529	68.1022	106.774	96.7509	249.209	363.631	351.331	308.268									84.3951	318.11	-1.91119	2.09008e-22	4.29612e-21	ARMC5
RF00003	ENSG00000274210	3.42613	2.55383	0.802815	5.88918	68.93	59.5032	74.3861	77.9264									3.16799	70.1864	-4.48129	2.24575e-22	4.59082e-21	RF00003
TTK	ENSG00000112742	673.234	761.042	595.689	628.46	253.45	183.799	176.238	273.888									664.606	221.844	1.58035	2.2458e-22	4.59082e-21	TTK
AL451042.2	ENSG00000227959	10.2784	9.36405	16.8591	21.0328	79.5347	156.031	133.895	105.43									14.3836	118.723	-3.03844	3.20447e-22	6.46167e-21	AL451042.2
MIER1	ENSG00000198160	446.253	572.058	387.76	457.674	172.855	116.362	136.184	162.729									465.936	147.032	1.65976	3.28083e-22	6.60371e-21	MIER1
TOB1-AS1	ENSG00000229980	7.70878	5.95894	14.4507	6.7305	89.0788	80.6599	74.3861	81.3644									8.71222	81.3723	-3.2155	5.25461e-22	1.0389e-20	TOB1-AS1
DENND4C	ENSG00000137145	365.739	481.823	328.351	362.605	134.679	137.519	111.007	107.722									384.63	122.732	1.6488	5.2742e-22	1.04185e-20	DENND4C
CAMK2A	ENSG00000070808	197.859	307.311	294.633	329.794	69.9905	88.5937	69.8085	71.0506									282.399	74.8608	1.91968	6.08076e-22	1.19483e-20	CAMK2A
HIST1H2BD	ENSG00000158373	78.8009	105.558	75.4646	106.847	249.209	321.317	287.245	319.728									91.6676	294.375	-1.68261	9.70093e-22	1.87641e-20	HIST1H2BD
AP005264.1	ENSG00000267069	1.71306	3.40511	1.60563	4.20656	55.144	72.7262	65.2309	72.1965									2.73259	66.3244	-4.6038	1.67422e-21	3.16964e-20	AP005264.1
ARID4A	ENSG00000032219	207.281	366.049	286.605	263.331	78.4742	48.9249	62.9421	79.0724									280.816	67.3534	2.05361	1.73321e-21	3.27376e-20	ARID4A
LINP1	ENSG00000223784	126.767	74.0611	133.267	106.005	375.404	408.589	341.032	330.041									110.025	363.766	-1.72367	2.49843e-21	4.65108e-20	LINP1
RSPRY1	ENSG00000159579	413.705	487.782	397.393	403.83	158.009	76.6931	140.761	123.766									425.677	124.807	1.76304	3.63365e-21	6.64788e-20	RSPRY1
MED18	ENSG00000130772	114.775	110.666	172.605	144.706	411.459	429.746	450.894	349.523									135.688	410.405	-1.59516	4.80211e-21	8.6718e-20	MED18
IGF2BP3	ENSG00000136231	260.386	462.243	417.464	390.369	125.135	76.6931	99.5629	105.43									382.615	101.705	1.90669	5.5211e-21	9.91308e-20	IGF2BP3
LINC00909	ENSG00000264247	11.1349	7.66149	19.2676	10.0957	86.9579	116.362	83.5413	84.8023									12.0399	92.9158	-2.93829	5.69909e-21	1.01925e-19	LINC00909
RAB8B	ENSG00000166128	363.169	407.762	237.633	329.794	103.925	70.0816	91.5521	100.846									334.59	91.6012	1.86374	6.48208e-21	1.15466e-19	RAB8B
SH2B2	ENSG00000160999	230.407	174.512	223.183	222.106	56.2045	56.8586	67.5197	69.9046									212.552	62.6219	1.76235	8.51755e-21	1.49456e-19	SH2B2
PGBD5	ENSG00000177614	173.019	162.594	133.267	164.897	27.572	50.2472	37.7652	28.6494									158.444	36.0585	2.14863	1.39869e-20	2.40877e-19	PGBD5
SLC25A45	ENSG00000162241	25.6959	24.687	36.1267	30.2872	120.893	121.651	141.906	118.036									29.1992	125.621	-2.10262	2.12266e-20	3.58633e-19	SLC25A45
CENPC	ENSG00000145241	164.454	213.671	154.943	159.008	45.5999	25.1236	43.4872	45.8391									173.019	40.0124	2.10126	2.13331e-20	3.60159e-19	CENPC
PODXL2	ENSG00000114631	0	0	4.01407	3.36525	54.0836	97.8498	68.6641	68.7586									1.84483	72.339	-5.26306	2.2615e-20	3.81225e-19	PODXL2
CNIH2	ENSG00000174871	8.56531	10.2153	13.6479	17.6676	65.7487	126.94	99.5629	92.8241									12.524	96.269	-2.93565	3.5221e-20	5.85723e-19	CNIH2
MTF2	ENSG00000143033	474.518	543.966	382.943	397.941	131.497	46.2803	105.285	126.057									449.842	102.28	2.12936	4.72026e-20	7.73485e-19	MTF2
FOXN2	ENSG00000170802	275.803	378.818	195.084	270.902	81.6556	51.5695	70.9529	71.0506									280.152	68.8071	2.0194	7.73385e-20	1.24355e-18	FOXN2
IRF1	ENSG00000125347	4653.54	3629.85	1865.74	3948.28	534.473	342.474	555.035	527.149									3524.35	489.783	2.84665	1.14405e-19	1.8134e-18	IRF1
ARNTL	ENSG00000133794	290.364	315.824	247.267	273.426	97.5625	108.428	104.141	74.4885									281.72	96.1549	1.55279	1.28114e-19	2.02352e-18	ARNTL
RORA	ENSG00000069667	159.315	235.804	145.309	180.041	42.4185	54.2141	36.6208	35.5253									180.117	42.1947	2.09983	1.34532e-19	2.11888e-18	RORA
CDR2	ENSG00000140743	729.765	704.006	727.35	722.687	235.423	179.832	350.187	224.611									720.952	247.513	1.54026	1.65177e-19	2.58873e-18	CDR2
E2F5	ENSG00000133740	126.767	129.394	122.028	95.0683	26.5116	5.28918	21.7436	14.8977									118.314	17.1105	2.76152	1.8518e-19	2.89817e-18	E2F5
TFPI2	ENSG00000105825	195.289	135.353	114	86.6551	446.455	511.728	419.995	487.04									132.824	466.304	-1.81217	2.5853e-19	3.98186e-18	TFPI2
TLE4	ENSG00000106829	327.195	477.566	354.844	471.976	158.009	112.395	138.473	134.079									407.895	135.739	1.58374	2.76188e-19	4.24211e-18	TLE4
SRM	ENSG00000116649	892.506	517.576	728.153	560.314	1740.22	1724.27	2161.77	2550.94									674.637	2044.3	-1.5995	3.1871e-19	4.86841e-18	SRM
PELI1	ENSG00000197329	480.514	573.761	350.83	518.248	170.734	136.196	187.682	134.079									480.838	157.173	1.6108	3.99407e-19	6.05546e-18	PELI1
PPIAP29	ENSG00000214975	59.1007	63.8458	58.6055	59.7332	187.702	208.922	153.35	203.984									60.3213	188.489	-1.64269	5.09701e-19	7.67027e-18	PPIAP29
AFTPH	ENSG00000119844	753.748	756.785	586.858	645.286	269.357	125.618	225.447	232.633									685.669	213.264	1.68041	7.43226e-19	1.0999e-17	AFTPH
CRY1	ENSG00000008405	195.289	233.25	224.788	190.137	73.1719	74.0485	56.0757	72.1965									210.866	68.8731	1.61548	9.34498e-19	1.36753e-17	CRY1
AL031963.3	ENSG00000272277	3.42613	4.25638	4.01407	10.9371	51.9626	76.6931	72.0973	63.0287									5.65841	65.9454	-3.54086	1.05369e-18	1.5339e-17	AL031963.3
AL031058.1	ENSG00000261189	33.4047	40.8613	23.2816	29.4459	139.981	212.889	117.873	131.787									31.7484	150.633	-2.24496	1.14506e-18	1.6561e-17	AL031058.1
USP6NL	ENSG00000148429	250.964	304.757	289.013	290.253	101.804	67.437	93.8409	119.182									283.747	95.566	1.56421	2.24602e-18	3.1583e-17	USP6NL
CEP44	ENSG00000164118	226.124	192.389	169.394	175.834	50.9022	66.1147	64.0865	45.8391									190.935	56.7356	1.75532	2.3592e-18	3.31328e-17	CEP44
IL23A	ENSG00000110944	26.5525	22.9845	19.2676	11.7784	96.5021	115.04	90.4077	110.014									20.1457	102.991	-2.35397	2.51543e-18	3.52161e-17	IL23A
AL109614.1	ENSG00000276603	13.7045	12.7692	6.42252	15.9849	69.9905	95.2052	109.863	68.7586									12.2203	85.9542	-2.81715	3.19799e-18	4.43267e-17	AL109614.1
LHFPL2	ENSG00000145685	333.191	346.47	293.83	248.187	111.349	51.5695	99.5629	87.0942									305.419	87.3938	1.79674	3.97188e-18	5.45784e-17	LHFPL2
SESN1	ENSG00000080546	109.636	114.071	98.7462	91.703	22.2697	6.61147	13.7328	24.0655									103.539	16.6699	2.61128	4.01606e-18	5.51515e-17	SESN1
AC005256.1	ENSG00000267073	25.6959	8.51277	22.4788	10.0957	90.1393	132.229	104.141	107.722									16.6958	108.558	-2.69654	4.11449e-18	5.64686e-17	AC005256.1
TMEM263	ENSG00000151135	445.396	392.439	319.52	310.444	154.827	87.2714	109.863	108.868									366.95	115.207	1.6654	4.18714e-18	5.73597e-17	TMEM263
AC241952.1	ENSG00000275131	169.593	200.05	220.774	163.215	62.5673	55.5364	62.9421	57.2988									188.408	59.5861	1.65911	1.10296e-17	1.45897e-16	AC241952.1
BX255925.1	ENSG00000260996	2.56959	0	3.21126	0.841312	54.0836	55.5364	75.5305	45.8391									1.65554	57.7474	-5.11013	1.1314e-17	1.49482e-16	BX255925.1
IRAK2	ENSG00000134070	164.454	146.42	166.986	118.625	34.9953	35.7019	49.2093	22.9195									149.121	35.7065	2.06257	2.16245e-17	2.79415e-16	IRAK2
C14orf132	ENSG00000227051	273.234	258.788	276.971	275.95	103.925	115.04	72.0973	58.4448									271.236	87.3767	1.63797	5.0404e-17	6.32232e-16	C14orf132
SH3RF1	ENSG00000154447	400	400.1	337.182	375.225	136.8	47.6026	117.873	113.452									378.127	103.932	1.85506	6.51184e-17	8.08614e-16	SH3RF1
GPATCH4	ENSG00000160818	160.171	182.173	237.633	203.598	809.133	353.053	822.824	872.088									195.894	714.275	-1.86703	2.80814e-16	3.28234e-15	GPATCH4
AC084018.1	ENSG00000272849	6.85225	8.51277	26.4929	19.3502	109.228	145.452	85.8301	89.3862									15.302	107.474	-2.80288	4.0364e-16	4.65459e-15	AC084018.1
ELF1	ENSG00000120690	913.919	1156.89	756.252	852.249	331.925	140.163	310.133	313.998									919.826	274.055	1.74385	4.39543e-16	5.05032e-15	ELF1
TTC9	ENSG00000133985	192.72	205.158	198.295	188.454	81.6556	52.8918	77.8193	56.1529									196.157	67.1299	1.53981	4.49257e-16	5.15663e-15	TTC9
SNORD3A	ENSG00000263934	17.1306	14.4717	12.845	14.3023	68.93	68.7593	68.6641	85.9483									14.6874	73.0754	-2.31697	1.55123e-15	1.70253e-14	SNORD3A
FAM122A	ENSG00000187866	34.2613	46.8202	73.859	46.2722	169.674	140.163	210.57	228.049									50.3032	187.114	-1.89378	4.62187e-15	4.82344e-14	FAM122A
RF00003	ENSG00000270722	0	0	0	0	38.1766	68.7593	50.3537	41.2552									0	49.6362	-8.32634	9.79738e-15	9.86461e-14	RF00003
SMAD6	ENSG00000137834	165.311	268.152	283.394	335.684	78.4742	79.3376	90.4077	84.8023									263.135	83.2555	1.66021	1.05669e-14	1.06059e-13	SMAD6
CAMK1G	ENSG00000008118	10.2784	7.66149	3.21126	6.7305	48.7813	55.5364	59.5089	50.423									6.97041	53.5624	-2.94892	1.24773e-14	1.24283e-13	CAMK1G
LEKR1	ENSG00000197980	23.1263	18.7281	17.6619	16.8262	64.6882	93.8829	98.4185	79.0724									19.0857	84.0155	-2.13649	1.24976e-14	1.2443e-13	LEKR1
AL139393.2	ENSG00000272841	2.56959	0.851277	3.21126	1.68262	36.0557	43.6357	45.776	41.2552									2.07869	41.6807	-4.31573	1.35576e-14	1.34742e-13	AL139393.2
CEACAM6	ENSG00000086548	53.9615	48.5228	50.5773	46.2722	200.427	129.585	185.393	123.766									49.8334	159.793	-1.68407	1.57482e-14	1.55612e-13	CEACAM6
UTP3	ENSG00000132467	92.5054	131.948	180.633	137.975	445.394	288.26	407.407	412.552									135.765	388.403	-1.51671	2.77655e-14	2.68878e-13	UTP3
TRIM23	ENSG00000113595	226.124	226.44	142.098	146.388	59.3859	35.7019	59.5089	56.1529									185.263	52.6874	1.8063	3.11182e-14	3.00562e-13	TRIM23
AC083841.1	ENSG00000253196	113.919	206.009	223.183	213.693	64.6882	44.958	51.4981	52.7149									189.201	53.4648	1.81898	3.74866e-14	3.59118e-13	AC083841.1
SOX7	ENSG00000171056	498.501	726.139	397.393	752.974	244.967	185.121	219.725	178.772									593.752	207.146	1.51754	4.14357e-14	3.95421e-13	SOX7
TCTEX1D4	ENSG00000188396	19.7002	11.9179	9.63378	22.7154	79.5347	132.229	90.4077	60.7368									15.9918	90.7271	-2.503	4.52641e-14	4.29932e-13	TCTEX1D4
AL117332.1	ENSG00000275457	4.28266	0.851277	5.6197	8.41312	46.6603	56.8586	40.054	50.423									4.79169	48.499	-3.33249	5.53613e-14	5.21397e-13	AL117332.1
AC004057.1	ENSG00000196656	183.298	153.23	130.056	163.215	369.041	769.575	444.028	378.172									157.45	490.204	-1.63691	6.78901e-14	6.33244e-13	AC004057.1
LINC01002	ENSG00000282508	81.3705	97.0456	97.9434	95.0683	25.4511	13.2229	22.888	28.6494									92.8569	22.5529	2.02819	7.06492e-14	6.57878e-13	LINC01002
LCOR	ENSG00000196233	382.013	659.74	391.774	433.276	195.125	96.5275	156.783	156.999									466.701	151.359	1.62005	7.65165e-14	7.09847e-13	LCOR
AC080023.1	ENSG00000254554	2.56959	5.10766	4.01407	6.7305	51.9626	58.1809	56.0757	27.5034									4.60546	48.4307	-3.39262	8.39567e-14	7.75643e-13	AC080023.1
RF00004	ENSG00000278048	1.71306	3.40511	3.21126	5.04787	45.5999	35.7019	30.8988	68.7586									3.34433	45.2398	-3.75832	1.01562e-13	9.32492e-13	RF00004
FOXJ1	ENSG00000129654	1.71306	9.36405	14.4507	17.6676	55.144	120.329	89.2633	73.3425									10.7988	84.5197	-2.95987	1.24818e-13	1.13296e-12	FOXJ1
PBDC1	ENSG00000102390	103.64	90.2354	103.563	100.957	328.743	167.931	327.299	356.399									99.5991	295.093	-1.56934	1.60969e-13	1.44464e-12	PBDC1
PLLP	ENSG00000102934	183.298	141.312	125.239	150.595	47.7208	52.8918	58.3645	36.6713									150.111	48.9121	1.61924	1.96894e-13	1.75645e-12	PLLP
PRDM10	ENSG00000170325	163.598	179.619	203.915	185.089	69.9905	26.4459	59.5089	66.4667									183.055	55.603	1.70737	2.04839e-13	1.82514e-12	PRDM10
IL17C	ENSG00000124391	0	0.851277	1.60563	2.52394	46.6603	42.3134	32.0432	40.1092									1.24521	40.2815	-5.00498	2.16978e-13	1.92944e-12	IL17C
ZNF8	ENSG00000278129	124.197	137.907	187.859	130.403	43.4789	18.5121	51.4981	38.9632									145.091	38.1131	1.91729	2.27854e-13	2.02212e-12	ZNF8
AL354920.1	ENSG00000254473	5.13919	5.95894	2.40844	2.52394	27.572	63.4701	49.2093	42.4011									4.00763	45.6631	-3.51113	2.79589e-13	2.45488e-12	AL354920.1
AL356356.1	ENSG00000237781	107.066	98.7481	63.4224	121.99	21.2092	30.4128	12.5884	10.3138									97.8068	18.6311	2.40543	3.1576e-13	2.75835e-12	AL356356.1
SH2B3	ENSG00000111252	158.458	141.312	122.831	88.3378	26.5116	9.25606	42.3428	27.5034									127.735	26.4035	2.26072	3.49763e-13	3.0411e-12	SH2B3
AOC3	ENSG00000131471	23.9829	24.687	21.676	21.0328	67.8696	97.8498	121.307	76.7805									22.8447	90.9516	-1.99162	4.01661e-13	3.45729e-12	AOC3
CFAP45	ENSG00000213085	112.206	115.774	109.986	155.643	36.0557	43.6357	35.4764	42.4011									123.402	39.3923	1.65101	7.48354e-13	6.27672e-12	CFAP45
AP003469.4	ENSG00000261087	120.771	127.692	107.577	130.403	45.5999	38.3465	45.776	38.9632									121.611	42.1714	1.52399	1.24618e-12	1.01804e-11	AP003469.4
EXO5	ENSG00000164002	5.13919	8.51277	15.2535	5.04787	53.0231	51.5695	56.0757	56.1529									8.48833	54.2053	-2.66632	1.32268e-12	1.07532e-11	EXO5
UPK2	ENSG00000110375	23.1263	13.6204	26.4929	26.0807	67.8696	133.552	120.162	75.6345									22.3301	99.3045	-2.14698	1.41997e-12	1.14865e-11	UPK2
RBM47	ENSG00000163694	249.251	337.106	253.69	251.552	125.135	56.8586	77.8193	112.306									272.9	93.0296	1.54512	1.46441e-12	1.18288e-11	RBM47
C6orf99	ENSG00000203711	0.856531	4.25638	2.40844	2.52394	28.6325	54.2141	27.4656	45.8391									2.51132	39.0378	-3.95222	1.49631e-12	1.20821e-11	C6orf99
AC005076.1	ENSG00000224046	5.13919	0.851277	5.6197	2.52394	33.9348	43.6357	37.7652	41.2552									3.53353	39.1477	-3.46017	1.56858e-12	1.26428e-11	AC005076.1
SLC2A3	ENSG00000059804	763.17	446.069	252.084	444.213	158.009	158.675	94.9853	108.868									476.384	130.134	1.87258	1.68698e-12	1.35725e-11	SLC2A3
AC090970.2	ENSG00000274528	11.1349	8.51277	12.0422	9.25443	55.144	72.7262	38.9096	59.5908									10.2361	56.5927	-2.46145	2.18138e-12	1.73375e-11	AC090970.2
SPOPL	ENSG00000144228	249.251	235.804	146.915	222.106	83.7765	52.8918	89.2633	58.4448									213.519	71.0941	1.58045	2.21145e-12	1.75453e-11	SPOPL
UBAC2-AS1	ENSG00000228889	29.1221	18.7281	28.9013	34.4938	100.744	117.684	77.8193	93.9701									27.8113	97.5544	-1.80759	2.47855e-12	1.95738e-11	UBAC2-AS1
CHAC2	ENSG00000143942	13.7045	7.66149	8.83096	8.41312	73.1719	40.9911	69.8085	44.6931									9.65252	57.1661	-2.57272	2.48166e-12	1.95915e-11	CHAC2
LYSMD3	ENSG00000176018	234.69	297.096	165.38	217.9	81.6556	33.0574	65.2309	87.0942									228.766	66.7595	1.76809	2.57957e-12	2.03285e-11	LYSMD3
MT-TV	ENSG00000210077	17.9872	33.1998	24.8873	21.0328	89.0788	130.907	83.5413	74.4885									24.2768	94.5039	-1.95637	3.80949e-12	2.95917e-11	MT-TV
ZNF436-AS1	ENSG00000249087	131.906	110.666	162.169	139.658	45.5999	56.8586	25.1768	41.2552									136.1	42.2226	1.69567	3.93703e-12	3.05113e-11	ZNF436-AS1
LRAT	ENSG00000121207	20.5568	28.9434	15.2535	17.6676	86.9579	58.1809	96.1297	87.0942									20.6053	82.0907	-2.00046	4.84106e-12	3.72037e-11	LRAT
APOBEC3A	ENSG00000128383	19.7002	29.7947	17.6619	33.6525	101.804	81.9822	85.8301	88.2402									25.2023	89.4642	-1.83145	6.29988e-12	4.79032e-11	APOBEC3A
CSF3	ENSG00000108342	0.856531	0.851277	0.802815	0	29.6929	46.2803	49.2093	59.5908									0.627656	46.1933	-6.19875	6.34834e-12	4.82058e-11	CSF3
RNVU1-6	ENSG00000201558	0	0	0	0	34.9953	66.1147	13.7328	21.7736									0	34.1541	-7.78556	7.76096e-12	5.84154e-11	RNVU1-6
AC117394.2	ENSG00000244268	1.71306	1.70255	1.60563	1.68262	22.2697	54.2141	32.0432	32.0874									1.67597	35.1536	-4.38328	7.84207e-12	5.89662e-11	AC117394.2
PHACTR2	ENSG00000112419	129.336	159.189	97.9434	146.388	53.0231	43.6357	40.054	41.2552									133.214	44.492	1.57871	9.70623e-12	7.22524e-11	PHACTR2
TNFAIP8	ENSG00000145779	728.908	901.502	710.491	861.504	215.274	60.8255	96.1297	162.729									800.601	133.739	2.57886	1.12298e-11	8.31772e-11	TNFAIP8
FUT8	ENSG00000033170	145.61	163.445	173.408	112.736	55.144	62.1478	52.6425	36.6713									148.8	51.6514	1.53026	1.31057e-11	9.63613e-11	FUT8
ANXA10	ENSG00000109511	25.6959	46.8202	35.3239	43.7482	106.046	107.106	115.585	120.328									37.8971	112.266	-1.567	1.31091e-11	9.63613e-11	ANXA10
SLC25A30	ENSG00000174032	411.992	479.269	261.718	319.699	143.162	67.437	145.339	146.685									368.169	125.656	1.54589	4.61575e-11	3.23204e-10	SLC25A30
AL596244.1	ENSG00000261534	110.493	112.369	93.9293	101.799	29.6929	34.3796	46.9204	32.0874									104.647	35.7701	1.54952	5.40434e-11	3.75476e-10	AL596244.1
MIR212	ENSG00000267195	0	0.851277	0	0	26.5116	72.7262	40.054	20.6276									0.212819	39.9798	-7.29041	5.7471e-11	3.98544e-10	MIR212
AL157392.3	ENSG00000239665	107.923	115.774	114.803	104.323	40.2976	25.1236	51.4981	29.7954									110.705	36.6787	1.58498	6.54827e-11	4.51575e-10	AL157392.3
CYB561D2	ENSG00000114395	23.1263	30.646	36.1267	26.922	75.2928	84.6268	88.1189	122.62									29.2052	92.6645	-1.66368	1.76059e-10	1.16409e-09	CYB561D2
SLC11A1	ENSG00000018280	5.13919	5.95894	6.42252	4.20656	27.572	40.9911	38.9096	40.1092									5.4318	36.8955	-2.7586	1.80366e-10	1.19186e-09	SLC11A1
PLEKHA6	ENSG00000143850	130.193	91.0866	79.4787	91.703	24.3906	29.0905	30.8988	37.8172									98.1153	30.5493	1.68398	2.01126e-10	1.3216e-09	PLEKHA6
PIK3R3	ENSG00000117461	116.488	141.312	134.873	112.736	43.4789	14.5452	43.4872	52.7149									126.352	38.5566	1.69941	3.57713e-10	2.29311e-09	PIK3R3
C11orf91	ENSG00000205177	0	6.81022	2.40844	7.57181	25.4511	60.8255	43.4872	34.3793									4.19762	41.0358	-3.28554	5.20942e-10	3.28843e-09	C11orf91
MAPK6	ENSG00000069956	2366.6	2374.21	1586.36	2078.04	672.333	236.691	551.601	558.091									2101.3	504.679	2.05701	5.57015e-10	3.50721e-09	MAPK6
C15orf62	ENSG00000188277	71.9486	64.6971	73.0562	91.703	18.0279	15.8675	30.8988	21.7736									75.3512	21.6419	1.79507	7.98731e-10	4.95365e-09	C15orf62
IL20	ENSG00000162891	4.28266	9.36405	7.22533	6.7305	27.572	44.958	36.6208	52.7149									6.90063	40.4664	-2.54746	1.04992e-09	6.42573e-09	IL20
TOE1	ENSG00000132773	33.4047	37.4562	40.1407	33.6525	89.0788	71.4039	137.328	137.517									36.1635	108.832	-1.59125	1.05592e-09	6.45533e-09	TOE1
AL391069.2	ENSG00000232671	3.42613	0	7.22533	10.0957	38.1766	68.7593	27.4656	46.9851									5.1868	45.3467	-3.11704	1.20624e-09	7.3162e-09	AL391069.2
PTGER4	ENSG00000171522	69.379	68.9534	28.0985	72.3528	155.888	207.6	185.393	144.393									59.696	173.319	-1.53845	1.36836e-09	8.24121e-09	PTGER4
SLC52A1	ENSG00000132517	41.97	61.2919	57.8027	56.3679	9.54416	6.61147	11.444	19.4816									54.3581	11.7703	2.19784	1.67568e-09	9.98422e-09	SLC52A1
EID2	ENSG00000176396	23.9829	33.1998	70.6477	46.2722	143.162	116.362	132.751	153.561									43.5256	136.459	-1.64614	1.72612e-09	1.02793e-08	EID2
MB21D2	ENSG00000180611	151.606	147.271	105.972	113.577	33.9348	10.5784	59.5089	34.3793									129.606	34.6003	1.89376	1.81928e-09	1.08081e-08	MB21D2
AC139100.2	ENSG00000278000	1.71306	1.70255	4.81689	5.88918	25.4511	38.3465	29.7544	28.6494									3.53042	30.5504	-3.10116	2.03106e-09	1.20087e-08	AC139100.2
JADE3	ENSG00000102221	96.7881	91.0866	74.6618	105.164	37.1162	23.8013	37.7652	28.6494									91.9251	31.833	1.52079	2.22246e-09	1.30917e-08	JADE3
AP005432.2	ENSG00000273335	0	0	0	0.841312	25.4511	26.4459	22.888	24.0655									0.210328	24.7126	-6.60327	2.27045e-09	1.33638e-08	AP005432.2
SASH1	ENSG00000111961	72.8052	100.451	85.9012	103.481	26.5116	43.6357	22.888	29.7954									90.6596	30.7077	1.5738	3.46855e-09	1.99782e-08	SASH1
PDE5A	ENSG00000138735	59.9572	97.0456	113.197	50.4787	22.2697	18.5121	25.1768	17.1897									80.1696	20.7871	1.94494	3.96485e-09	2.26612e-08	PDE5A
AGAP1-IT1	ENSG00000235529	0	0.851277	0.802815	1.68262	30.7534	27.7682	19.4548	22.9195									0.834179	25.224	-4.91348	4.19773e-09	2.39065e-08	AGAP1-IT1
PER1	ENSG00000179094	7967.46	4739.06	2214.97	4391.65	922.602	1326.26	1209.63	1060.03									4828.28	1129.63	2.09575	1.70276e-08	9.12642e-08	PER1
CTSW	ENSG00000172543	5.13919	5.10766	8.83096	7.57181	28.6325	31.7351	46.9204	32.0874									6.66241	34.8438	-2.38225	2.11515e-08	1.12315e-07	CTSW
NAT1	ENSG00000171428	4.28266	5.10766	8.83096	5.88918	34.9953	27.7682	34.332	32.0874									6.02762	32.2957	-2.41819	2.40377e-08	1.27126e-07	NAT1
AL449106.1	ENSG00000273062	5.99572	7.66149	2.40844	0	30.7534	43.6357	24.0324	29.7954									4.01641	32.0542	-3.00058	2.75375e-08	1.44674e-07	AL449106.1
GPBP1	ENSG00000062194	781.157	879.369	653.491	711.75	243.906	80.6599	201.415	258.991									756.442	196.243	1.94469	3.38323e-08	1.76089e-07	GPBP1
AC010864.1	ENSG00000273008	8.56531	2.55383	4.01407	6.7305	24.3906	39.6688	27.4656	32.0874									5.46593	30.9031	-2.49742	9.53299e-08	4.72245e-07	AC010864.1
AC135983.2	ENSG00000223509	69.379	75.7637	52.9858	58.0505	27.572	15.8675	19.4548	21.7736									64.0448	21.167	1.58549	1.04188e-07	5.14412e-07	AC135983.2
AL136040.1	ENSG00000273783	0	0	1.60563	1.68262	18.0279	17.1898	24.0324	20.6276									0.822063	19.9694	-4.58096	1.0561e-07	5.20624e-07	AL136040.1
PIH1D2	ENSG00000150773	5.13919	5.10766	7.22533	6.7305	31.8139	26.4459	25.1768	38.9632									6.05067	30.5999	-2.33777	1.07478e-07	5.29133e-07	PIH1D2
DYRK2	ENSG00000127334	806.853	974.712	652.689	905.252	289.506	93.8829	256.346	264.721									834.876	226.114	1.88284	1.12898e-07	5.53495e-07	DYRK2
CLK4	ENSG00000113240	135.332	123.435	76.2674	116.942	44.5394	14.5452	35.4764	53.8609									112.994	37.1055	1.59418	1.33182e-07	6.47388e-07	CLK4
GZMB	ENSG00000100453	5.99572	3.40511	7.22533	4.20656	27.572	21.1567	28.61	36.6713									5.20818	28.5025	-2.45149	1.89045e-07	9.02221e-07	GZMB
SIRPB2	ENSG00000196209	11.1349	4.25638	8.02815	2.52394	38.1766	31.7351	33.1876	28.6494									6.48584	32.9372	-2.34539	1.96088e-07	9.34235e-07	SIRPB2
AC073111.5	ENSG00000284691	52.2484	61.2919	70.6477	80.766	26.5116	13.2229	17.166	29.7954									66.2385	21.674	1.59987	2.61526e-07	1.22932e-06	AC073111.5
ABCA1	ENSG00000165029	35.9743	40.8613	43.352	55.5266	11.6651	7.93376	12.5884	14.8977									43.9286	11.7712	1.89066	2.7079e-07	1.27087e-06	ABCA1
BLNK	ENSG00000095585	38.5439	53.6305	63.4224	70.6702	16.9674	18.5121	20.5992	14.8977									56.5667	17.7441	1.67517	2.9883e-07	1.39512e-06	BLNK
AC083880.1	ENSG00000273391	1.71306	1.70255	4.01407	1.68262	14.8465	35.7019	14.8772	21.7736									2.27808	21.7998	-3.23839	4.20099e-07	1.92265e-06	AC083880.1
TP53I3	ENSG00000115129	7.70878	21.2819	19.2676	20.1915	49.8417	64.7924	50.3537	50.423									17.1124	53.8527	-1.64901	6.03271e-07	2.70762e-06	TP53I3
SETMAR	ENSG00000170364	9.42185	9.36405	16.8591	12.6197	28.6325	39.6688	52.6425	49.277									12.0662	42.5552	-1.81295	9.05732e-07	3.97944e-06	SETMAR
PPFIA4	ENSG00000143847	59.1007	45.1177	53.7886	50.4787	21.2092	22.479	13.7328	13.7517									52.1214	17.7932	1.55503	1.06121e-06	4.61676e-06	PPFIA4
PAGR1	ENSG00000280789	25.6959	19.5794	27.2957	20.1915	78.4742	31.7351	98.4185	74.4885									23.1906	70.7791	-1.61447	1.06135e-06	4.61676e-06	PAGR1
S1PR5	ENSG00000180739	462.527	518.428	510.59	635.191	103.925	19.8344	130.462	120.328									531.684	93.6373	2.50321	1.09051e-06	4.73625e-06	S1PR5
ZNF189	ENSG00000136870	12.848	22.1332	37.7323	21.8741	73.1719	59.5032	57.2201	85.9483									23.6469	68.9609	-1.54143	1.17619e-06	5.0846e-06	ZNF189
F8A1	ENSG00000277203	20.5568	18.7281	20.0704	14.3023	57.265	33.0574	61.7977	61.8828									18.4144	53.5007	-1.54406	1.25916e-06	5.42224e-06	F8A1
AC107959.3	ENSG00000253616	7.70878	7.66149	15.2535	4.20656	31.8139	35.7019	36.6208	35.5253									8.70758	34.9155	-1.99583	1.43927e-06	6.15151e-06	AC107959.3
CHMP4BP1	ENSG00000258469	8.56531	1.70255	1.60563	11.7784	22.2697	37.0242	40.054	32.0874									5.91297	32.8588	-2.47722	1.75781e-06	7.42054e-06	CHMP4BP1
AC092368.3	ENSG00000261512	45.3962	45.969	44.1548	43.7482	13.786	13.2229	18.3104	14.8977									44.817	15.0543	1.57149	1.91719e-06	8.06131e-06	AC092368.3
FLI1	ENSG00000151702	41.1135	40.01	42.5492	30.2872	11.6651	11.9006	10.2996	11.4598									38.49	11.3313	1.7655	2.05115e-06	8.5825e-06	FLI1
RPL7P19	ENSG00000241458	1.71306	7.66149	4.81689	7.57181	30.7534	22.479	40.054	18.3356									5.44081	27.9055	-2.36125	2.51506e-06	1.04278e-05	RPL7P19
EID3	ENSG00000255150	6.85225	7.66149	8.83096	10.0957	30.7534	29.0905	25.1768	37.8172									8.36011	30.7095	-1.8766	3.68159e-06	1.49394e-05	EID3
AL139274.2	ENSG00000272008	0	0	0	0	5.30231	17.1898	5.72201	8.02184									0	9.05899	-5.86523	4.28333e-06	1.72462e-05	AL139274.2
RNF224	ENSG00000233198	16.2741	22.9845	34.521	26.922	47.7208	87.2714	100.707	50.423									25.1754	71.5306	-1.50032	4.4413e-06	1.78308e-05	RNF224
AP001273.1	ENSG00000279696	3.42613	17.0255	16.0563	9.25443	39.2371	50.2472	49.2093	29.7954									11.4406	42.1222	-1.87443	5.61398e-06	2.22346e-05	AP001273.1
MIR31HG	ENSG00000171889	17.1306	19.5794	14.4507	10.9371	27.572	58.1809	53.7869	46.9851									15.5244	46.6312	-1.58213	6.82264e-06	2.67367e-05	MIR31HG
ZNF775	ENSG00000196456	34.2613	41.7126	61.8167	64.781	25.4511	11.9006	14.8772	12.6057									50.6429	16.2087	1.63118	7.96857e-06	3.09231e-05	ZNF775
AC090114.2	ENSG00000273270	19.7002	3.40511	15.2535	10.0957	46.6603	42.3134	41.1984	36.6713									12.1136	41.7109	-1.78298	9.63235e-06	3.70508e-05	AC090114.2
PPP1R27	ENSG00000182676	5.99572	10.2153	8.02815	8.41312	29.6929	26.4459	28.61	29.7954									8.16308	28.6361	-1.81202	9.73393e-06	3.73835e-05	PPP1R27
FGF17	ENSG00000158815	23.9829	24.687	40.1407	50.4787	10.6046	10.5784	9.15521	8.02184									34.8223	9.59001	1.86276	1.44141e-05	5.4173e-05	FGF17
MATR3	ENSG00000015479	55.6745	46.8202	21.676	47.1135	18.0279	3.96688	10.2996	13.7517									42.8211	11.5115	1.87135	1.45858e-05	5.47815e-05	MATR3
UCN2	ENSG00000145040	5.99572	11.0666	6.42252	12.6197	29.6929	29.0905	37.7652	26.3575									9.02613	30.7265	-1.76966	1.71526e-05	6.3767e-05	UCN2
LINC00941	ENSG00000285517	17.9872	7.66149	13.6479	7.57181	37.1162	31.7351	35.4764	38.9632									11.7171	35.8227	-1.61379	2.44443e-05	8.90777e-05	LINC00941
PRC1	ENSG00000198901	61.6703	56.1843	33.7182	58.8918	30.7534	17.1898	16.0216	9.16782									52.6162	18.2832	1.51478	3.48366e-05	0.000124169	PRC1
B3GNT2	ENSG00000170340	407.709	400.1	223.985	342.414	130.437	35.7019	115.585	132.933									343.552	103.664	1.72584	5.16976e-05	0.000179477	B3GNT2
DOK3	ENSG00000146094	6.85225	9.36405	6.42252	10.9371	30.7534	14.5452	36.6208	29.7954									8.39397	27.9287	-1.7432	8.11068e-05	0.000274483	DOK3
AL136131.2	ENSG00000236961	4.28266	5.10766	9.63378	2.52394	26.5116	31.7351	16.0216	16.0437									5.38701	22.578	-2.05603	9.21814e-05	0.000309101	AL136131.2
RPL24P2	ENSG00000235065	7.70878	6.81022	4.01407	10.0957	24.3906	25.1236	18.3104	29.7954									7.1572	24.405	-1.77307	0.00010381	0.000345445	RPL24P2
PLCB2	ENSG00000137841	12.848	13.6204	8.83096	3.36525	36.0557	23.8013	34.332	26.3575									9.66615	30.1366	-1.64684	0.000145139	0.00047185	PLCB2
AC119427.1	ENSG00000282221	10.2784	2.55383	6.42252	4.20656	18.0279	14.5452	26.3212	33.2333									5.86532	23.0319	-1.97699	0.000147481	0.000479115	AC119427.1
FUT3	ENSG00000171124	31.6917	26.3896	24.8873	27.7633	8.4837	7.93376	12.5884	8.02184									27.683	9.25693	1.57681	0.000168303	0.000541942	FUT3
ZNF181	ENSG00000197841	4.28266	8.51277	23.2816	8.41312	24.3906	46.2803	32.0432	36.6713									11.1225	34.8464	-1.63488	0.000352577	0.00107922	ZNF181
MASP2	ENSG00000009724	0.856531	6.81022	19.2676	5.88918	27.572	39.6688	35.4764	19.4816									8.20587	30.5497	-1.88429	0.000532315	0.00158331	MASP2
RF00003	ENSG00000275405	0	0	0	0	4.24185	6.61147	4.5776	1.14598									0	4.14423	-4.74253	0.00157766	0.00431451	RF00003
RF00003	ENSG00000275291	0	0	0	0	4.24185	1.32229	3.4332	2.29195									0	2.82233	-4.20459	0.0104628	0.0241705	RF00003
RF00003	ENSG00000206828	0	0	0	0	0	1.32229	1.1444	9.16782									0	2.90863	-4.2388	0.0224551	0.047772	RF00003
MID1IP1	ENSG00000165175					1370.85	1363.59	1562.61	1528.12	6359.09	7530.01	6159.4	6194.6					6560.77	1456.29	2.1714	1.40204e-102	8.96481e-100	MID1IP1
EGR3	ENSG00000179388					1115.56	1367.43	1318.35	1036.5	116.35	110.905	175.928	138.155					135.334	1209.46	-3.16253	3.18426e-92	1.6099e-89	EGR3
KRT5	ENSG00000186081					211715	275248	245131	231557	57582.5	63309.9	64868	59129.4					61222.4	240913	-1.97638	4.35709e-89	2.01539e-86	KRT5
SLPI	ENSG00000124107					5395.18	6881.97	5384.94	6262.28	1114.34	1080.66	1383.25	1156.35					1183.65	5981.09	-2.33746	1.12924e-88	5.01013e-86	SLPI
INPP1	ENSG00000151689					487.735	430.203	489.642	488.287	1805.06	1951.93	1700.31	1879.06					1834.09	473.967	1.95108	2.7204e-88	1.15964e-85	INPP1
NCOA7	ENSG00000111912					950.564	857.846	919.054	943.282	2799.77	2803.68	2926	3179.15					2927.15	917.686	1.67285	6.61532e-78	2.21257e-75	NCOA7
MT-CYB	ENSG00000198727					57684.5	67900.4	60528.2	65611.4	12763.2	8266.42	12686.1	12348.5					11516.1	62931.1	-2.45011	1.3413e-74	3.99451e-72	MT-CYB
PTGS2	ENSG00000073756					2312.07	3284.14	2222.91	2263.88	273.668	179.223	340.256	286.691					269.959	2520.75	-3.22335	3.77096e-74	1.07869e-71	PTGS2
THBS1	ENSG00000137801					6329.14	5903.77	8279.29	6721.72	1720.67	1539.36	1437.39	1363.98					1515.35	6808.48	-2.16767	2.92484e-70	7.66097e-68	THBS1
TRIM25	ENSG00000121060					1693.58	1574.85	1796.84	1541.43	439.999	393.048	313.19	391.305					384.385	1651.68	-2.10177	4.00641e-70	1.0247e-67	TRIM25
DSP	ENSG00000096696					17287.6	16236.3	16104.6	13778.6	4128.78	3991.7	4835.11	4731.59					4421.79	15851.8	-1.84199	5.56123e-70	1.37388e-67	DSP
AMBRA1	ENSG00000110497					421.32	400.755	460.642	448.336	1547.78	1871.19	1709.01	1484.56					1653.14	432.763	1.93259	1.65799e-67	3.67803e-65	AMBRA1
SPINDOC	ENSG00000168005					452.452	491.661	543.179	544.884	1746.07	2078.8	1846.27	1757.68					1857.21	508.044	1.87013	2.18508e-67	4.79834e-65	SPINDOC
SREBF1	ENSG00000072310					10143.9	13879.2	12576.8	10912.1	44000.7	53609.7	50505.7	44617.5					48183.4	11878	2.02033	5.76706e-67	1.23432e-64	SREBF1
SPON2	ENSG00000159674					1940.56	2841.13	2321.06	2096.31	426.889	432.086	540.349	430.435					457.44	2299.76	-2.33038	1.1961e-65	2.47651e-63	SPON2
MYD88	ENSG00000172936					2901.5	4150.95	3739.79	3506.79	914.411	772.787	943.436	885.627					879.065	3574.76	-2.02357	8.38687e-62	1.54517e-59	MYD88
MT-ND3	ENSG00000198840					12190.3	10673.1	9393.53	11906.4	2964.46	2422.17	2206.83	2997.08					2647.63	11040.8	-2.05981	1.97609e-60	3.46454e-58	MT-ND3
KCNK5	ENSG00000164626					209.622	262.475	352.453	251.912	1550.24	2260.69	1550.48	1635.49					1749.23	269.115	2.70103	1.11684e-58	1.82557e-56	KCNK5
STC2	ENSG00000113739					1240.09	1299.57	1567.08	1257.34	349.869	373.528	310.29	382.52					354.052	1341.02	-1.92014	1.14617e-58	1.85954e-56	STC2
ACTB	ENSG00000075624					70275.4	87986.8	89380.2	85609	25670.7	29512.3	26047.9	27612.5					27210.9	83312.8	-1.61435	2.13568e-58	3.41395e-56	ACTB
EIF5	ENSG00000100664					5625.56	4814.18	5452.98	5264.62	1737.87	1217.29	1493.45	1367.97					1454.15	5289.33	-1.86291	1.35872e-57	2.14047e-55	EIF5
NRP2	ENSG00000118257					640.282	629.94	804.172	682.492	2204.09	2200.36	2025.1	2224.85					2163.6	689.222	1.65015	1.75499e-56	2.66808e-54	NRP2
CTSV	ENSG00000136943					2322.45	2230.4	2014.33	2211.72	816.907	693.822	785.874	787.401					771.001	2194.73	-1.50904	1.95938e-56	2.95811e-54	CTSV
PPIF	ENSG00000108179					3816.79	4800.09	5032.49	4695.33	1549.42	1351.27	1306.89	1332.03					1384.9	4586.17	-1.72716	1.25062e-55	1.84955e-53	PPIF
MEPCE	ENSG00000146834					1955.09	2154.86	2413.63	2165.11	734.151	723.101	611.88	612.512					670.411	2172.17	-1.69567	1.84574e-54	2.65738e-52	MEPCE
PTK2B	ENSG00000120899					402.641	480.137	508.603	541.555	2049.23	2903.05	1987.4	2097.07					2259.19	483.234	2.22539	2.07815e-54	2.9723e-52	PTK2B
KRT17	ENSG00000128422					88487.6	132298	116096	114099	27378.3	33726.7	29119.9	27044.8					29317.4	112745	-1.94324	9.35691e-54	1.31238e-51	KRT17
F3	ENSG00000117525					1769.34	1542.84	1944.07	1518.13	543.239	449.831	428.219	423.248					461.134	1693.59	-1.87656	6.31075e-52	8.52147e-50	F3
CEACAM6	ENSG00000086548					196.132	125.476	180.688	119.852	749.719	963.543	942.469	841.705					874.359	155.537	2.48661	9.81161e-52	1.29275e-49	CEACAM6
NAMPT	ENSG00000105835					1091.7	823.276	828.71	976.574	2763.72	2886.19	2874.77	2941.17					2866.46	930.064	1.62279	1.6215e-50	2.06148e-48	NAMPT
MTATP6P1	ENSG00000248527					4920.94	4921.73	4932.11	8600.51	1022.57	1016.78	895.104	1113.22					1011.92	5843.82	-2.52962	1.92208e-50	2.42942e-48	MTATP6P1
LGALS9	ENSG00000168961					108.962	129.317	156.15	137.608	546.516	568.721	638.946	529.459					570.911	133.009	2.10218	2.72351e-49	3.34515e-47	LGALS9
TSC22D1	ENSG00000102804					4707.16	6556.76	5083.8	5373.38	1829.64	1616.55	1732.21	1675.42					1713.46	5430.27	-1.66384	3.82614e-49	4.62113e-47	TSC22D1
PSRC1	ENSG00000134222					423.396	464.773	395.952	498.275	1315.9	1351.27	1231.49	1284.92					1295.89	445.599	1.54097	1.33705e-48	1.58839e-46	PSRC1
SIPA1	ENSG00000213445					489.81	631.221	571.063	531.567	1645.28	2101.87	2038.63	1740.91					1881.67	555.915	1.76015	6.75847e-48	7.98528e-46	SIPA1
PDIA5	ENSG00000065485					327.924	357.222	318.992	336.252	921.786	1029.2	943.436	1110.83					1001.31	335.098	1.58056	1.60007e-46	1.79307e-44	PDIA5
LYN	ENSG00000254087					374.622	293.204	307.838	370.654	1020.11	1037.18	1003.37	1062.11					1030.69	336.58	1.61234	3.60096e-46	3.96173e-44	LYN
RGS3	ENSG00000138835					243.868	275.279	213.033	216.4	785.771	846.428	754.942	740.285					781.856	237.145	1.72334	1.16538e-45	1.25423e-43	RGS3
SMAD6	ENSG00000137834					76.7923	76.822	88.1132	82.121	375.269	534.119	377.954	422.45					427.448	80.9621	2.39989	2.11444e-45	2.23145e-43	SMAD6
IFNGR2	ENSG00000159128					214.811	181.812	189.611	201.973	626.814	754.155	620.58	677.197					669.686	197.052	1.76293	4.90644e-45	5.07933e-43	IFNGR2
NCDN	ENSG00000020129					932.923	1044.78	1155.51	1076.45	379.366	384.175	360.555	344.987					367.271	1052.42	-1.51869	7.66987e-45	7.86524e-43	NCDN
IRF1	ENSG00000125347					523.018	331.615	540.948	510.482	2784.2	4565.74	2367.29	2775.07					3123.08	476.516	2.7112	1.69764e-44	1.7166e-42	IRF1
SH2D3A	ENSG00000125731					602.924	468.614	594.485	517.141	1543.68	1825.05	1694.51	1522.89					1646.54	545.791	1.59127	3.65647e-43	3.4412e-41	SH2D3A
DNAJB1	ENSG00000132002					2393.01	2136.93	2450.44	2262.77	8394.39	14821.4	8778.01	9532.67					10381.6	2310.79	2.16746	1.01847e-42	9.38202e-41	DNAJB1
ADA	ENSG00000196839					331.037	466.053	354.683	350.679	1135.64	1182.69	1197.66	1155.55					1167.88	375.613	1.63958	2.14607e-42	1.96859e-40	ADA
HIST1H2BD	ENSG00000158373					243.868	311.129	279.955	309.618	60.633	55.8962	55.0982	63.8865					58.8785	286.142	-2.27669	4.99181e-42	4.46592e-40	HIST1H2BD
ARHGEF3	ENSG00000163947					135.943	94.7471	114.882	127.621	435.902	537.668	459.152	479.947					478.167	118.298	2.00965	8.88506e-42	7.82029e-40	ARHGEF3
C11orf68	ENSG00000175573					4912.63	7697.56	6393.22	5687.44	1679.7	1227.05	1769.91	1541.26					1554.48	6172.71	-1.98938	2.00371e-41	1.74942e-39	C11orf68
LOXL2	ENSG00000134013					1313.77	1983.29	1710.96	1429.35	5049.75	4854.09	5466.32	5019.88					5097.51	1609.34	1.66405	8.30127e-40	6.65939e-38	LOXL2
DNMBP	ENSG00000107554					283.301	212.541	266.57	220.839	762.829	954.671	775.241	883.231					843.993	245.813	1.77725	1.05955e-39	8.4376e-38	DNMBP
GJA1	ENSG00000152661					701.508	612.015	644.676	614.798	211.396	239.555	226.193	196.451					218.399	643.249	-1.56066	1.416e-39	1.11941e-37	GJA1
CYTOR	ENSG00000222041					329.999	334.176	235.34	325.155	923.424	987.499	943.436	956.7					952.765	306.168	1.63836	2.31403e-39	1.79668e-37	CYTOR
P2RY6	ENSG00000171631					119.339	188.214	176.226	153.145	580.93	714.229	651.512	580.569					631.81	159.231	1.99238	4.05911e-39	3.12926e-37	P2RY6
FAM110C	ENSG00000184731					187.83	163.887	155.035	158.693	531.768	621.956	519.083	519.078					547.971	166.361	1.71826	7.43941e-39	5.69481e-37	FAM110C
TNFRSF12A	ENSG00000006327					3821.97	5719.4	4929.88	4711.97	1690.35	1276.74	1375.52	1241.79					1396.1	4795.8	-1.78009	1.35811e-38	1.02518e-36	TNFRSF12A
SLC38A2	ENSG00000134294					2828.86	2256.01	2497.28	2513.57	715.306	968.867	634.113	761.048					769.833	2523.93	-1.71307	3.87421e-38	2.80751e-36	SLC38A2
CCNO	ENSG00000152669					91.3206	111.392	117.112	98.7672	377.727	387.724	371.188	354.57					372.802	104.648	1.83567	1.02126e-37	7.32745e-36	CCNO
PI4K2A	ENSG00000155252					575.942	491.661	629.061	553.762	1665.77	2227.86	1582.38	1728.13					1801.04	562.607	1.67781	1.13918e-37	8.14662e-36	PI4K2A
TUBB2A	ENSG00000137267					1718.49	2491.59	2492.82	2127.38	630.092	538.555	737.543	657.232					640.855	2207.57	-1.78436	1.89594e-37	1.3296e-35	TUBB2A
EFNB2	ENSG00000125266					504.339	618.417	738.366	511.592	134.376	147.282	92.797	93.434					116.972	593.178	-2.34119	2.09603e-37	1.4652e-35	EFNB2
MAFB	ENSG00000204103					2274.71	3062.64	2181.64	2237.24	541.6	366.43	700.81	543.035					537.969	2439.06	-2.181	3.67587e-37	2.53694e-35	MAFB
MVK	ENSG00000110921					439.999	512.147	567.717	661.407	1858.32	2705.2	1905.24	1933.37					2100.53	545.317	1.94564	3.69314e-37	2.54079e-35	MVK
MHENCR	ENSG00000232442					108.962	104.99	111.536	110.974	353.966	383.288	355.722	360.959					363.484	109.116	1.73509	4.27374e-37	2.93095e-35	MHENCR
HOXC13	ENSG00000123364					135.943	94.7471	131.612	119.852	415.418	454.267	405.02	454.393					432.275	120.539	1.83731	9.64728e-37	6.51341e-35	HOXC13
RILPL2	ENSG00000150977					203.396	197.176	162.842	219.729	628.453	730.199	574.181	628.483					640.329	195.786	1.70948	1.24459e-36	8.35105e-35	RILPL2
IRX4	ENSG00000113430					420.282	334.176	423.836	350.679	1046.33	1389.42	1269.19	1108.43					1203.34	382.243	1.6526	1.45208e-36	9.62446e-35	IRX4
MYC	ENSG00000136997					2816.41	4216.25	4386.7	3290.39	979.141	875.706	585.781	592.547					758.294	3677.44	-2.27746	1.84839e-36	1.2177e-34	MYC
SERTAD1	ENSG00000197019					2024.62	3809.09	2972.43	2743.29	725.957	539.442	729.81	700.356					673.891	2887.36	-2.09876	4.55911e-36	2.95866e-34	SERTAD1
DHRS3	ENSG00000162496					688.018	1007.65	1037.28	924.416	2966.1	3867.48	2760.71	3119.26					3178.39	914.341	1.79821	9.03789e-36	5.77893e-34	DHRS3
PPFIA3	ENSG00000177380					134.905	190.775	165.073	175.339	512.103	516.374	559.682	510.293					524.613	166.523	1.65928	2.87645e-35	1.77653e-33	PPFIA3
ENC1	ENSG00000171617					475.282	510.866	582.216	477.19	140.111	175.674	130.496	163.709					152.497	511.389	-1.74403	3.03378e-35	1.86839e-33	ENC1
TXNIP	ENSG00000265972					1289.9	906.5	794.134	987.672	3346.29	4807.96	3365.82	3736.56					3814.16	994.552	1.93867	3.85827e-35	2.34955e-33	TXNIP
FASN	ENSG00000169710					13210.4	17470.6	19015.7	14433.3	43324.7	56332.7	53549.7	45094.3					49575.3	16032.5	1.62865	6.06594e-35	3.67336e-33	FASN
ARL8A	ENSG00000143862					356.981	294.484	469.565	433.91	1385.55	1826.83	1307.86	1371.96					1473.05	388.735	1.92066	6.24794e-35	3.77306e-33	ARL8A
CSF1	ENSG00000184371					119.339	74.2613	122.689	133.169	462.941	416.116	458.185	488.732					456.493	112.365	2.01624	6.4597e-35	3.89013e-33	CSF1
NR4A3	ENSG00000119508					132.83	230.466	210.802	178.669	22.1229	10.6469	25.1325	15.9716					18.4685	188.192	-3.35223	7.28026e-35	4.34815e-33	NR4A3
PRSS8	ENSG00000052344					471.131	364.904	523.102	500.494	2086.1	4222.38	2118.86	2203.29					2657.66	464.908	2.5144	7.67685e-35	4.57246e-33	PRSS8
TNK1	ENSG00000174292					868.583	1056.3	1041.74	1062.02	389.198	264.398	267.758	275.511					299.216	1007.16	-1.74942	2.40836e-34	1.39621e-32	TNK1
KLF3	ENSG00000109787					443.112	331.615	507.487	461.653	1261	1344.17	1226.66	1445.43					1319.32	435.967	1.59578	4.08995e-34	2.3585e-32	KLF3
PER1	ENSG00000179094					902.829	1284.21	1178.93	1026.51	2945.62	3795.62	3052.63	3113.67					3226.88	1098.12	1.55592	8.38383e-34	4.75887e-32	PER1
AP002387.1	ENSG00000254682					139.056	177.971	127.151	138.718	483.425	481.772	440.786	443.213					462.299	145.724	1.67027	1.88192e-33	1.05992e-31	AP002387.1
PTGS1	ENSG00000095303					1671.79	1842.45	1791.26	1660.18	443.276	712.454	585.781	530.258					567.942	1741.42	-1.61712	3.31913e-33	1.84076e-31	PTGS1
SUSD6	ENSG00000100647					517.829	282.961	568.832	511.592	1986.14	3004.2	1971.94	2184.92					2286.8	470.304	2.28008	3.57303e-33	1.96808e-31	SUSD6
HSD17B7	ENSG00000132196					114.151	78.1024	101.497	116.523	368.714	430.312	410.82	344.189					388.509	102.568	1.91478	5.2685e-33	2.85629e-31	HSD17B7
LIPE	ENSG00000079435					62.264	58.8969	64.6907	68.8041	267.113	357.558	246.492	282.698					288.465	63.6639	2.17858	6.0505e-33	3.25589e-31	LIPE
FSTL3	ENSG00000070404					3248.11	5465.88	4423.5	3780.9	1404.39	1205.76	1302.06	1257.77					1292.49	4229.6	-1.71003	8.56782e-33	4.57652e-31	FSTL3
TIPARP	ENSG00000163659					539.622	462.212	631.292	545.994	1579.74	2128.49	1494.42	1604.35					1701.75	544.78	1.64244	1.07908e-32	5.72178e-31	TIPARP
ICAM1	ENSG00000090339					67.4527	98.5882	99.2667	83.2308	341.675	296.338	352.822	339.397					332.558	87.1346	1.93755	1.37195e-32	7.23936e-31	ICAM1
SLC25A28	ENSG00000155287					623.678	476.296	714.944	690.261	1823.91	2431.93	1808.57	2015.62					2020.01	626.295	1.68834	2.41133e-32	1.26319e-30	SLC25A28
LINC01089	ENSG00000212694					339.339	510.866	539.833	332.923	72.1041	86.0623	104.397	91.0383					88.4003	430.74	-2.28588	2.45292e-31	1.23156e-29	LINC01089
MEG3	ENSG00000214548					196.132	211.26	205.226	214.181	40.9683	54.1217	44.4652	55.1021					48.6643	206.7	-2.08458	4.95844e-31	2.44992e-29	MEG3
ZNHIT2	ENSG00000174276					484.622	615.856	643.561	627.005	208.119	163.252	129.529	170.098					167.749	592.761	-1.8176	6.53395e-31	3.21376e-29	ZNHIT2
GJB5	ENSG00000189280					1489.15	1491.63	1805.76	1782.25	538.323	715.116	539.382	495.12					571.985	1642.2	-1.5221	2.05188e-30	9.84721e-29	GJB5
CXXC5	ENSG00000171604					244.905	148.523	218.61	239.705	735.79	1020.33	756.875	719.522					808.128	212.936	1.92044	4.14786e-30	1.96887e-28	CXXC5
SOX7	ENSG00000171056					239.717	179.251	214.148	173.12	584.207	884.579	637.013	753.062					714.715	201.559	1.82409	1.44937e-29	6.63352e-28	SOX7
AC020916.1	ENSG00000267519					463.867	445.568	498.564	380.642	64.7298	138.41	69.5977	81.4553					88.5481	447.16	-2.33714	2.38858e-29	1.06628e-27	AC020916.1
RNF19B	ENSG00000116514					431.697	279.12	585.562	500.494	1753.44	2316.59	1639.41	1749.69					1864.78	449.218	2.05209	5.64197e-29	2.48796e-27	RNF19B
CERK	ENSG00000100422					623.678	860.406	653.599	563.75	233.519	222.697	189.46	205.235					212.728	675.358	-1.66439	9.66122e-29	4.20912e-27	CERK
AREG	ENSG00000109321					1170.56	1883.42	1381.93	1366.09	441.638	462.252	541.316	459.184					476.098	1450.5	-1.6071	1.67563e-28	7.21348e-27	AREG
ETV7	ENSG00000010030					72.6414	102.429	92.5746	94.3282	289.236	339.813	311.257	286.691					306.749	90.4934	1.7655	2.05504e-28	8.77732e-27	ETV7
POLR2A	ENSG00000181222					6892.63	7520.87	11435.8	8038.98	2798.95	3131.07	2568.35	2525.11					2755.87	8472.06	-1.62022	4.29038e-28	1.80063e-26	POLR2A
PRKCE	ENSG00000171132					47.7358	78.1024	56.8832	56.5969	239.255	299	228.126	242.769					252.287	59.8296	2.08539	6.89977e-28	2.86262e-26	PRKCE
C6orf136	ENSG00000204564					185.754	148.523	147.227	194.205	489.161	676.965	508.45	508.696					545.818	168.927	1.68946	2.72866e-27	1.09854e-25	C6orf136
NOV	ENSG00000136999					268.773	349.54	272.147	297.411	85.214	45.2493	81.1974	62.2893					68.4875	296.968	-2.11574	3.38723e-27	1.35864e-25	NOV
SHB	ENSG00000107338					90.2829	87.0649	95.9207	102.096	282.681	296.338	284.191	269.92					283.283	93.8412	1.59229	6.78188e-27	2.67583e-25	SHB
BNIP1	ENSG00000113734					118.302	113.953	66.9214	114.304	369.534	372.641	347.989	362.556					363.18	103.37	1.8135	9.50981e-27	3.74535e-25	BNIP1
ANXA10	ENSG00000109511					103.773	103.71	112.651	116.523	283.5	361.107	374.088	337.001					338.924	109.164	1.6328	1.48409e-26	5.79987e-25	ANXA10
MRPS24	ENSG00000062582					349.716	555.679	523.102	392.849	99.9625	35.4896	92.797	70.2752					74.6311	455.337	-2.60833	1.94246e-26	7.51408e-25	MRPS24
MED18	ENSG00000130772					402.641	416.119	439.451	338.472	132.737	116.229	68.6311	94.2326					102.957	399.171	-1.95103	4.08253e-26	1.55709e-24	MED18
SLURP2	ENSG00000283992					174.339	279.12	166.188	149.815	27.8584	33.7151	38.6654	30.3461					32.6463	192.366	-2.56055	8.91848e-26	3.31432e-24	SLURP2
RFFL	ENSG00000092871					162.924	138.28	155.035	128.73	428.528	614.858	411.787	450.4					476.393	146.242	1.70229	3.10946e-25	1.12479e-23	RFFL
MND1	ENSG00000121211					49.8112	39.6914	31.23	46.6092	159.776	183.659	202.027	224.401					192.466	41.8355	2.19797	5.25624e-25	1.88255e-23	MND1
FAM3C	ENSG00000196937					653.772	355.942	518.641	501.604	1454.37	1395.63	1563.05	1629.9					1510.74	507.49	1.57164	6.09873e-25	2.17355e-23	FAM3C
ADPRM	ENSG00000170222					72.6414	66.5791	94.8053	82.121	290.055	260.849	253.258	242.769					261.733	79.0367	1.72513	6.51997e-25	2.31987e-23	ADPRM
LMTK3	ENSG00000142235					71.6037	85.7846	98.1514	75.4626	247.448	304.324	262.925	265.928					270.156	82.7505	1.709	8.39568e-25	2.96784e-23	LMTK3
TMEM150A	ENSG00000168890					351.792	372.587	485.18	403.947	154.041	113.567	125.663	138.953					133.056	403.376	-1.59815	1.17135e-24	4.10729e-23	TMEM150A
SETD7	ENSG00000145391					392.263	293.204	356.914	342.911	131.918	97.5965	115.996	121.384					116.724	346.323	-1.56918	2.53698e-24	8.7131e-23	SETD7
TOX2	ENSG00000124191					62.264	87.0649	78.075	56.5969	228.603	248.427	274.524	238.776					247.583	71.0002	1.80752	2.70208e-24	9.23636e-23	TOX2
LINC01133	ENSG00000224259					246.981	279.12	201.88	251.912	64.7298	77.1899	78.2974	75.8652					74.0206	244.973	-1.72697	2.89828e-24	9.86052e-23	LINC01133
ZXDB	ENSG00000198455					324.811	380.269	325.684	310.728	137.653	104.694	109.23	96.6283					112.051	335.373	-1.5797	3.28529e-24	1.11077e-22	ZXDB
TTK	ENSG00000112742					248.018	177.971	171.765	265.229	589.123	656.558	602.214	689.974					634.467	215.746	1.55359	3.69604e-24	1.24384e-22	TTK
LGALS7B	ENSG00000178934					2575.66	4296.91	2640.05	2906.42	1099.59	999.033	1148.36	915.174					1040.54	3104.76	-1.57698	4.9505e-24	1.6583e-22	LGALS7B
ADGRF1	ENSG00000153292					371.509	249.671	258.763	332.923	843.127	750.606	1016.9	867.259					869.473	303.217	1.51706	5.8264e-24	1.94273e-22	ADGRF1
FOXD2-AS1	ENSG00000237424					75.7546	84.5042	69.1521	73.2431	233.519	298.113	259.058	221.207					252.974	75.6635	1.74273	9.06844e-24	3.00073e-22	FOXD2-AS1
NIPAL4	ENSG00000172548					218.962	130.597	196.303	174.23	480.967	621.956	521.983	542.237					541.786	180.023	1.58482	2.07817e-23	6.74319e-22	NIPAL4
PEX13	ENSG00000162928					345.565	192.055	277.724	275.216	775.119	794.08	724.01	819.344					778.138	272.64	1.50941	2.92391e-23	9.37548e-22	PEX13
RTN4R	ENSG00000040608					92.3583	66.5791	82.5364	96.5477	325.288	598.887	360.555	299.468					396.05	84.5054	2.22465	2.93976e-23	9.41244e-22	RTN4R
NKX2-8	ENSG00000136327					35.283	12.8037	18.9611	39.9508	173.705	218.261	173.994	146.14					178.025	26.7496	2.71776	3.87775e-23	1.23792e-21	NKX2-8
DSC2	ENSG00000134755					1627.17	860.406	1094.16	1137.49	399.85	355.783	391.487	411.269					389.598	1179.81	-1.59915	5.2431e-22	1.56573e-20	DSC2
YEATS4	ENSG00000127337					250.094	121.635	137.189	205.303	605.511	584.692	687.278	644.455					630.484	178.555	1.81536	7.92021e-22	2.3363e-20	YEATS4
ZNF121	ENSG00000197961					314.433	313.69	330.146	302.96	122.085	104.694	69.5977	111.801					102.045	315.307	-1.62213	8.29112e-22	2.43909e-20	ZNF121
AL162458.1	ENSG00000285796					118.302	93.4668	123.805	78.7918	14.7486	13.3086	17.3994	18.3674					15.956	103.591	-2.69992	8.77233e-22	2.57717e-20	AL162458.1
STX1A	ENSG00000106089					143.207	240.709	269.916	179.778	608.788	676.965	644.746	632.476					640.744	208.403	1.62322	9.99002e-22	2.93095e-20	STX1A
CIR1	ENSG00000138433					160.849	106.27	114.882	183.108	435.083	423.214	446.585	409.672					428.639	141.277	1.59655	1.33474e-21	3.89494e-20	CIR1
AC079305.1	ENSG00000222043					140.094	267.597	178.457	203.083	49.9813	32.8279	47.3651	40.7276					42.7255	197.308	-2.20413	4.24735e-21	1.2086e-19	AC079305.1
STK17B	ENSG00000081320					97.547	64.0183	104.844	102.096	262.197	336.264	269.691	313.044					295.299	92.1263	1.67473	4.25673e-21	1.20969e-19	STK17B
CLDN6	ENSG00000184697					95.4715	189.494	173.996	129.84	22.9422	28.3917	26.0991	28.7489					26.5455	147.2	-2.4679	5.13646e-21	1.45021e-19	CLDN6
RF00003	ENSG00000274210					67.4527	57.6165	72.4982	75.4626	0	2.66172	1.93327	4.79149					2.34662	68.2575	-4.85002	7.04676e-21	1.96911e-19	RF00003
NR4A1	ENSG00000123358					1452.83	2524.88	2039.99	1783.36	458.025	814.487	491.051	487.135					562.674	1950.26	-1.79319	1.07604e-20	2.98763e-19	NR4A1
PTGER4	ENSG00000171522					152.547	201.018	180.688	139.828	36.0521	33.7151	41.5653	53.5049					41.2094	168.52	-2.0267	1.16226e-20	3.2106e-19	PTGER4
POLR1A	ENSG00000068654					712.923	482.698	795.249	737.979	284.32	236.006	214.593	227.596					240.629	682.213	-1.50363	1.8519e-20	5.0642e-19	POLR1A
ECHDC3	ENSG00000134463					71.6037	79.3827	79.1903	84.3405	254.823	247.54	196.227	231.589					232.545	78.6293	1.56681	2.05032e-20	5.58571e-19	ECHDC3
AL109614.1	ENSG00000276603					68.4905	92.1864	107.074	66.5846	10.6517	6.21068	7.73308	12.7773					9.3432	83.5839	-3.14523	2.91255e-20	7.85593e-19	AL109614.1
SLC9A3-AS1	ENSG00000225138					378.773	444.287	375.875	302.96	95.8657	150.831	128.562	128.572					125.958	375.474	-1.5762	3.02669e-20	8.1537e-19	SLC9A3-AS1
RBPMS	ENSG00000157110					110	162.607	120.459	118.743	331.023	428.537	369.255	325.821					363.659	127.952	1.51159	3.5686e-20	9.57796e-19	RBPMS
SMIM3	ENSG00000256235					130.754	70.4202	129.381	126.511	371.172	516.374	338.322	388.909					403.694	114.267	1.81537	4.02616e-20	1.07266e-18	SMIM3
AC008894.3	ENSG00000279198					122.453	177.971	149.458	157.584	47.5232	34.6024	39.632	31.1447					38.2256	151.866	-1.98803	9.14881e-20	2.3678e-18	AC008894.3
CSPG4P10	ENSG00000276710					38.3962	42.2521	46.845	38.841	137.653	178.335	136.296	168.501					155.196	41.5836	1.90218	1.71122e-19	4.3511e-18	CSPG4P10
GTPBP8	ENSG00000163607					81.981	46.0932	72.4982	71.0236	210.577	210.276	227.159	212.423					215.109	67.899	1.65397	2.14761e-19	5.41009e-18	GTPBP8
CARMN	ENSG00000249669					63.3018	115.233	105.959	73.2431	2.4581	4.4362	13.5329	10.3816					7.70219	89.4342	-3.55138	3.06332e-19	7.63721e-18	CARMN
TCTEX1D4	ENSG00000188396					77.8301	128.037	88.1132	58.8164	10.6517	0.887241	9.66635	5.59007					6.69885	88.1991	-3.7172	3.25725e-19	8.10212e-18	TCTEX1D4
L1CAM	ENSG00000198910					128.679	134.438	161.727	128.73	40.9683	36.3769	33.8322	41.5262					38.1759	138.394	-1.85376	3.44564e-19	8.53169e-18	L1CAM
OVOL1-AS1	ENSG00000255120					66.415	148.523	102.613	85.4503	9.01302	13.3086	12.5663	16.7702					12.9145	100.75	-2.95712	4.60913e-19	1.12841e-17	OVOL1-AS1
PGLYRP3	ENSG00000159527					107.924	162.607	103.728	102.096	20.4841	25.73	28.9991	19.166					23.5948	119.089	-2.33994	4.77613e-19	1.16666e-17	PGLYRP3
LINC02551	ENSG00000254842					115.188	153.644	86.9978	130.95	30.3165	10.6469	18.3661	16.7702					19.0249	121.695	-2.66942	5.95122e-19	1.44397e-17	LINC02551
MBIP	ENSG00000151332					86.1319	53.7754	85.8825	94.3282	271.21	259.074	213.626	248.359					248.067	80.0295	1.62608	1.11185e-18	2.6446e-17	MBIP
MAP3K14	ENSG00000006062					111.038	80.6631	151.689	129.84	356.424	504.84	333.489	356.966					387.93	118.307	1.70972	3.29063e-18	7.57821e-17	MAP3K14
AC004130.1	ENSG00000271133					213.773	207.419	153.919	195.315	51.62	44.362	74.4309	57.4979					56.9777	192.607	-1.76115	3.39085e-18	7.79104e-17	AC004130.1
NFIL3	ENSG00000165030					68.4905	75.5416	65.806	99.8769	213.854	294.564	232.959	222.006					240.846	77.4288	1.63698	5.56685e-18	1.26726e-16	NFIL3
EXOC3L4	ENSG00000205436					85.0942	140.84	81.421	90.999	321.191	255.525	357.655	301.065					308.859	99.5886	1.63971	8.42088e-18	1.90104e-16	EXOC3L4
HOXA5	ENSG00000106004					75.7546	74.2613	114.882	81.0113	256.461	327.392	234.892	245.963					266.177	86.4772	1.6207	8.60968e-18	1.93762e-16	HOXA5
TTC9	ENSG00000133985					79.9055	51.2147	75.8443	54.3774	204.022	306.985	195.26	222.804					232.268	65.3355	1.8243	1.25221e-17	2.78354e-16	TTC9
SPOCD1	ENSG00000134668					62.264	79.3827	73.6135	57.7067	229.422	189.869	208.793	176.486					201.143	68.2417	1.56382	1.85328e-17	4.05335e-16	SPOCD1
PADI3	ENSG00000142619					30.0943	74.2613	52.4218	59.9262	187.635	262.623	231.026	182.077					215.84	54.1759	2.00337	2.17735e-17	4.71469e-16	PADI3
AL645608.7	ENSG00000272512					111.038	142.121	140.535	72.1333	16.3873	13.3086	21.266	27.9503					19.7281	116.457	-2.55609	2.30302e-17	4.97197e-16	AL645608.7
SH2B2	ENSG00000160999					54.9999	55.0558	65.806	67.6944	163.873	233.344	177.861	186.069					190.287	60.889	1.64243	2.52724e-17	5.41836e-16	SH2B2
USP43	ENSG00000154914					101.698	74.2613	133.843	100.987	271.21	359.332	327.689	266.726					306.239	102.697	1.57121	3.21408e-17	6.8437e-16	USP43
FAM214B	ENSG00000005238					94.4338	87.0649	76.9596	82.121	244.99	461.365	230.059	304.259					310.168	85.1448	1.86479	3.9491e-17	8.35151e-16	FAM214B
SALL4	ENSG00000101115					41.5094	39.6914	31.23	47.719	129.46	132.199	136.296	141.349					134.826	40.0374	1.75082	8.55441e-17	1.75944e-15	SALL4
CYP4B1	ENSG00000142973					61.2263	104.99	97.036	61.0359	11.4711	7.98517	8.69972	15.9716					11.0319	81.0721	-2.86066	8.80683e-17	1.80965e-15	CYP4B1
EDN1	ENSG00000078401					145.283	170.289	144.996	135.389	36.8714	29.2789	51.2317	51.1092					42.1228	148.989	-1.82187	8.83742e-17	1.81422e-15	EDN1
PCOLCE	ENSG00000106333					88.2074	131.878	75.8443	86.56	274.487	298.113	234.892	281.101					272.148	95.6224	1.51663	1.11367e-16	2.26908e-15	PCOLCE
DUSP16	ENSG00000111266					51.8867	52.495	36.8068	59.9262	153.221	234.232	151.762	181.278					180.123	50.2787	1.84152	1.33395e-16	2.70775e-15	DUSP16
TBPL1	ENSG00000028839					100.66	35.8503	69.1521	69.9138	285.958	257.3	215.56	264.33					255.787	68.8941	1.88283	1.55899e-16	3.15278e-15	TBPL1
IL6	ENSG00000136244					967.168	1393.04	1181.16	1198.52	141.75	54.1217	188.494	171.695					139.015	1184.97	-3.09155	1.64648e-16	3.3143e-15	IL6
PPIAP29	ENSG00000214975					183.679	202.298	149.458	197.534	58.1749	65.6558	57.9981	73.4695					63.8246	183.242	-1.51824	2.09152e-16	4.14869e-15	PPIAP29
RNF169	ENSG00000166439					66.415	42.2521	74.7289	68.8041	223.687	186.321	169.161	208.43					196.9	63.05	1.63718	2.15128e-16	4.25945e-15	RNF169
EIF3J-DT	ENSG00000179523					50.849	20.4859	37.9221	25.5241	145.847	147.282	158.528	122.982					143.66	33.6953	2.07675	2.26263e-16	4.45961e-15	EIF3J-DT
NABP1	ENSG00000173559					275	170.289	277.724	243.034	85.214	93.1603	68.6311	65.4837					78.1222	241.511	-1.63069	2.6164e-16	5.13363e-15	NABP1
NOL6	ENSG00000165271					887.263	608.174	1190.09	1057.59	344.953	378.852	237.792	304.259					316.464	935.777	-1.56403	3.9376e-16	7.60919e-15	NOL6
DUSP4	ENSG00000120875					1266.04	1645.27	2060.06	1604.69	621.079	785.208	461.085	417.658					571.257	1644.01	-1.52494	6.08673e-16	1.15669e-14	DUSP4
AC084018.1	ENSG00000272849					106.887	140.84	83.6517	86.56	26.2197	20.4065	24.1659	24.756					23.887	104.485	-2.12374	9.2557e-16	1.73166e-14	AC084018.1
MAT2A	ENSG00000168906					1378.11	1437.85	2065.64	1586.93	446.554	363.769	202.027	229.193					310.386	1617.13	-2.38087	2.08406e-15	3.78192e-14	MAT2A
AC100861.1	ENSG00000246582					50.849	38.411	64.6907	36.6215	136.834	195.193	149.828	181.278					165.783	47.643	1.7947	2.14909e-15	3.89667e-14	AC100861.1
CASC8	ENSG00000246228					72.6414	111.392	92.5746	94.3282	27.8584	18.6321	15.4662	19.9645					20.4803	92.734	-2.16737	2.93243e-15	5.23408e-14	CASC8
AC083841.1	ENSG00000253196					63.3018	43.5325	50.191	51.0482	4.91619	6.21068	6.76645	6.38865					6.07049	52.0184	-3.10725	3.01111e-15	5.3701e-14	AC083841.1
AK6	ENSG00000085231					88.2074	47.3736	100.382	89.8892	209.757	310.534	250.358	264.33					258.745	81.4631	1.66019	3.18637e-15	5.67335e-14	AK6
FBXO32	ENSG00000156804					86.1319	80.6631	83.6517	123.182	263.016	456.042	254.225	271.518					311.2	93.4071	1.73472	3.59247e-15	6.37033e-14	FBXO32
HMCN1	ENSG00000143341					113.113	151.083	109.305	108.755	27.8584	33.7151	40.5987	36.7347					34.7267	120.564	-1.79619	4.1551e-15	7.30249e-14	HMCN1
IKZF2	ENSG00000030419					42.5471	19.2055	26.7686	33.2923	98.3238	144.62	119.863	138.155					125.24	30.4534	2.02658	5.31339e-15	9.27815e-14	IKZF2
CREB5	ENSG00000146592					217.924	366.185	253.186	296.302	68.8267	28.3917	95.6969	73.4695					66.5962	283.399	-2.08967	5.89149e-15	1.02547e-13	CREB5
LHFPL2	ENSG00000145685					108.962	49.9343	97.036	84.3405	245.81	265.285	232.959	250.755					248.702	85.0682	1.53918	6.3117e-15	1.09685e-13	LHFPL2
CALML5	ENSG00000178372					111.038	107.551	103.728	100.987	20.4841	38.1513	23.1992	31.1447					28.2448	105.826	-1.905	6.7847e-15	1.17436e-13	CALML5
AP005264.1	ENSG00000267069					53.9622	70.4202	63.5753	69.9138	16.3873	8.87241	8.69972	7.98581					10.4863	64.4679	-2.611	1.08406e-14	1.8412e-13	AP005264.1
TENT5B	ENSG00000158246					321.698	404.596	329.03	310.728	772.661	1634.3	862.239	846.496					1028.92	341.513	1.59183	1.31293e-14	2.20922e-13	TENT5B
ZNF227	ENSG00000131115					57.0754	48.6539	59.1139	43.28	153.221	163.252	135.329	144.543					149.086	52.0308	1.51662	1.32904e-14	2.23286e-13	ZNF227
SLC35B3	ENSG00000124786					47.7358	48.6539	44.6143	66.5846	145.028	134.861	169.161	174.091					155.785	51.8971	1.58507	1.55412e-14	2.59896e-13	SLC35B3
SLC39A10	ENSG00000196950					162.924	186.934	157.265	128.73	43.4263	59.4451	55.0982	60.6922					54.6655	158.963	-1.5389	1.88168e-14	3.12751e-13	SLC39A10
RAB12	ENSG00000206418					139.056	60.1772	102.613	100.987	285.139	295.451	276.458	289.885					286.733	100.708	1.50147	2.05085e-14	3.39312e-13	RAB12
C8orf44	ENSG00000213865					38.3962	33.2895	28.9993	27.7436	111.434	110.905	110.196	100.621					108.289	32.1071	1.75173	2.07598e-14	3.43208e-13	C8orf44
APOBEC3A	ENSG00000128383					99.6225	79.3827	83.6517	85.4503	13.1098	29.2789	19.3327	13.5759					18.8243	87.0268	-2.22	2.55909e-14	4.20201e-13	APOBEC3A
TAF1A	ENSG00000143498					65.3772	46.0932	64.6907	47.719	169.609	135.748	189.46	166.105					165.23	55.97	1.55568	2.6836e-14	4.39319e-13	TAF1A
PCDH7	ENSG00000169851					1242.17	618.417	1514.65	1469.3	436.722	385.062	421.453	394.499					409.434	1211.13	-1.56529	5.13448e-14	8.25008e-13	PCDH7
RF00003	ENSG00000270722					37.3584	66.5791	49.0757	39.9508	2.4581	2.66172	5.79981	6.38865					4.32707	48.241	-3.47671	5.98443e-14	9.53823e-13	RF00003
AC004233.2	ENSG00000270168					161.887	202.298	214.148	199.754	39.3295	84.2879	68.6311	62.2893					63.6345	194.522	-1.61512	9.08916e-14	1.4267e-12	AC004233.2
AP002800.1	ENSG00000280032					16.6037	6.40183	14.4996	11.0974	84.3946	86.9496	61.8646	57.4979					72.6767	12.1507	2.56129	9.94835e-14	1.54926e-12	AP002800.1
CDK5RAP3	ENSG00000108465					124.528	78.1024	122.689	79.9015	284.32	358.445	303.523	220.408					291.674	101.305	1.52043	1.07955e-13	1.674e-12	CDK5RAP3
FTH1P8	ENSG00000219507					121.415	161.326	159.496	215.29	54.0781	47.911	37.6988	62.2893					50.4943	164.382	-1.69628	1.16927e-13	1.81053e-12	FTH1P8
MTF2	ENSG00000143033					128.679	44.8128	102.613	122.072	308.081	408.131	296.757	325.023					334.498	99.5441	1.74157	1.57514e-13	2.40983e-12	MTF2
IRAK2	ENSG00000134070					34.2452	34.5699	47.9603	22.1949	135.195	114.454	104.397	132.564					121.653	34.7426	1.81009	1.68138e-13	2.56874e-12	IRAK2
PLEKHA6	ENSG00000143850					23.8679	28.1681	30.1146	36.6215	87.6721	119.777	108.263	99.0241					103.684	29.693	1.80367	2.42745e-13	3.65716e-12	PLEKHA6
AL031058.1	ENSG00000261189					136.981	206.139	114.882	127.621	47.5232	28.3917	48.3318	42.3248					41.6429	146.406	-1.81057	2.59074e-13	3.88969e-12	AL031058.1
LEKR1	ENSG00000197980					63.3018	90.906	95.9207	76.5723	22.9422	18.6321	21.266	19.9645					20.7012	81.6752	-1.9769	3.28027e-13	4.87444e-12	LEKR1
LINC01011	ENSG00000244041					41.5094	39.6914	28.9993	36.6215	111.434	98.4837	121.796	132.564					116.069	36.7054	1.66175	3.4452e-13	5.10904e-12	LINC01011
IGFL1P1	ENSG00000268879					77.8301	83.2238	114.882	49.9385	16.3873	15.9703	19.3327	15.173					16.7158	81.4685	-2.28853	4.75284e-13	6.93934e-12	IGFL1P1
CFAP45	ENSG00000213085					35.283	42.2521	34.5761	41.0605	99.9625	106.469	138.229	136.557					120.304	38.2929	1.6541	5.10138e-13	7.42329e-12	CFAP45
RF00004	ENSG00000278048					44.6226	34.5699	30.1146	66.5846	2.4581	1.77448	5.79981	0					2.5081	43.9729	-4.19149	9.09076e-13	1.29511e-11	RF00004
PXYLP1	ENSG00000155893					36.3207	44.8128	24.5378	44.3897	140.111	131.312	114.063	102.218					121.926	37.5153	1.70515	1.06623e-12	1.50812e-11	PXYLP1
ZNF436-AS1	ENSG00000249087					44.6226	55.0558	24.5378	39.9508	145.847	123.326	127.596	122.183					129.738	41.0417	1.66726	1.16663e-12	1.64265e-11	ZNF436-AS1
AOC3	ENSG00000131471					66.415	94.7471	118.228	74.3528	18.8454	20.4065	16.4328	27.9503					20.9088	88.4357	-2.07146	1.1906e-12	1.67423e-11	AOC3
GCNT1	ENSG00000187210					129.717	44.8128	104.844	94.3282	282.681	497.742	300.624	277.906					339.738	93.4253	1.85594	1.19143e-12	1.67432e-11	GCNT1
KCP	ENSG00000135253					92.3583	167.728	142.766	133.169	37.6908	51.46	42.5319	35.1376					41.7051	134.005	-1.68354	1.51824e-12	2.11174e-11	KCP
AC092368.3	ENSG00000261512					13.4905	12.8037	17.8457	14.4267	65.5492	84.2879	59.9314	62.2893					68.0144	14.6416	2.21322	1.87177e-12	2.58199e-11	AC092368.3
KYNU	ENSG00000115919					92.3583	103.71	93.69	61.0359	24.581	15.9703	14.4995	27.9503					20.7503	87.6985	-2.06601	2.04042e-12	2.80219e-11	KYNU
LRIG2	ENSG00000198799					110	30.7288	62.46	75.4626	253.184	385.062	210.726	247.56					274.133	69.6628	1.96797	2.33159e-12	3.17201e-11	LRIG2
CNIH2	ENSG00000174871					64.3395	122.915	97.036	89.8892	29.4971	12.4214	24.1659	12.7773					19.7154	93.545	-2.24516	2.56137e-12	3.47158e-11	CNIH2
LINC00909	ENSG00000264247					85.0942	112.672	81.421	82.121	21.3035	18.6321	35.7655	18.3674					23.5171	90.3271	-1.95023	2.58934e-12	3.50512e-11	LINC00909
MEIS3	ENSG00000105419					99.6225	103.71	109.305	102.096	35.2327	33.7151	32.8656	42.3248					36.0346	103.683	-1.52043	2.61776e-12	3.54139e-11	MEIS3
AL451042.2	ENSG00000227959					77.8301	151.083	130.497	102.096	29.4971	28.3917	42.5319	25.5546					31.4938	115.377	-1.87629	3.36866e-12	4.51508e-11	AL451042.2
LINC01588	ENSG00000214900					85.0942	113.953	109.305	96.5477	36.0521	32.8279	23.1992	35.9362					32.0038	101.225	-1.65147	4.21566e-12	5.58832e-11	LINC01588
KLF9	ENSG00000119138					35.283	19.2055	31.23	13.3169	90.1302	119.777	102.463	87.0454					99.8541	24.7588	2.00089	4.35405e-12	5.75773e-11	KLF9
TMCC1	ENSG00000172765					120.377	61.4576	93.69	82.121	263.016	365.543	184.627	263.532					269.18	89.4114	1.58512	7.32587e-12	9.4575e-11	TMCC1
MMP24	ENSG00000125966					31.132	47.3736	69.1521	36.6215	4.91619	7.09792	6.76645	2.39574					5.29408	46.0698	-3.13858	1.02315e-11	1.30536e-10	MMP24
AL162377.1	ENSG00000231856					53.9622	80.6631	64.6907	97.6574	20.4841	10.6469	9.66635	20.7631					15.3901	74.2433	-2.25343	1.43737e-11	1.80107e-10	AL162377.1
SH3RF1	ENSG00000154447					133.868	46.0932	114.882	109.865	285.139	306.098	276.458	294.677					290.593	101.177	1.51466	2.13142e-11	2.64029e-10	SH3RF1
BX255925.1	ENSG00000260996					52.9244	53.7754	73.6135	44.3897	5.73556	12.4214	15.4662	4.79149					9.60364	56.1758	-2.57361	3.62523e-11	4.36393e-10	BX255925.1
E2F5	ENSG00000133740					25.9434	5.12147	21.1918	14.4267	84.3946	80.7389	67.6645	76.6638					77.3654	16.6708	2.19111	3.86219e-11	4.63122e-10	E2F5
SPRY4	ENSG00000187678					83.0187	84.5042	70.2675	93.2185	22.1229	33.7151	24.1659	20.7631					25.1917	82.7522	-1.71969	4.54098e-11	5.39753e-10	SPRY4
ADAMTSL4-AS1	ENSG00000203804					40.4716	65.2987	74.7289	37.7313	4.09683	7.09792	14.4995	7.18723					8.22038	54.5576	-2.74944	4.87604e-11	5.7737e-10	ADAMTSL4-AS1
TOB1-AS1	ENSG00000229980					87.1697	78.1024	72.4982	78.7918	26.2197	10.6469	20.2993	27.1518					21.0794	79.1405	-1.90103	5.66094e-11	6.65237e-10	TOB1-AS1
KIAA1958	ENSG00000165185					21.7924	14.084	18.9611	18.8656	75.3816	59.4451	65.7312	72.6709					68.3072	18.4258	1.88229	1.0366e-10	1.17803e-09	KIAA1958
AC073111.5	ENSG00000284691					25.9434	12.8037	16.7303	28.8533	68.0073	92.273	86.9972	71.8723					79.7874	21.0827	1.90506	1.18854e-10	1.34437e-09	AC073111.5
POP1	ENSG00000104356					262.547	138.28	284.416	311.838	110.614	65.6558	67.6645	89.4411					83.3439	249.27	-1.57954	1.25595e-10	1.41767e-09	POP1
MIR212	ENSG00000267195					25.9434	70.4202	39.0375	19.9754	0.819365	0	3.86654	3.19433					1.97006	38.8441	-4.31	1.25782e-10	1.41905e-09	MIR212
CAMK1G	ENSG00000008118					47.7358	53.7754	57.9985	48.8287	13.9292	7.98517	2.89991	12.7773					9.39789	52.0846	-2.44437	1.27672e-10	1.43738e-09	CAMK1G
MATR3	ENSG00000015479					17.6415	3.8411	10.0382	13.3169	39.3295	78.9644	68.6311	69.4766					64.1004	11.2094	2.48929	1.61548e-10	1.79645e-09	MATR3
AMH	ENSG00000104899					101.698	209.98	161.727	87.6697	31.9552	48.7982	26.0991	43.1234					37.494	140.269	-1.89718	1.66926e-10	1.85246e-09	AMH
UPK2	ENSG00000110375					66.415	129.317	117.112	73.2431	18.8454	26.6172	28.9991	31.1447					26.4016	96.5219	-1.86759	1.77566e-10	1.96452e-09	UPK2
CIRBP-AS1	ENSG00000267493					53.9622	34.5699	73.6135	57.7067	16.3873	6.21068	8.69972	7.98581					9.82088	54.9631	-2.48035	1.86472e-10	2.05886e-09	CIRBP-AS1
TOLLIP-AS1	ENSG00000255153					25.9434	34.5699	28.9993	26.6338	92.5882	73.641	83.1306	95.8298					86.2974	29.0366	1.57955	2.85529e-10	3.0806e-09	TOLLIP-AS1
LRAT	ENSG00000121207					85.0942	56.3361	93.69	84.3405	21.3035	27.5045	26.0991	25.5546					25.1154	79.8652	-1.67521	3.64007e-10	3.87727e-09	LRAT
ZNF778	ENSG00000170100					107.924	97.3079	161.727	143.157	50.8006	52.3472	30.9323	26.3532					40.1083	127.529	-1.6695	4.04365e-10	4.28197e-09	ZNF778
SNORD3A	ENSG00000263934					67.4527	66.5791	66.9214	83.2308	22.1229	27.5045	10.633	15.173					18.8583	71.046	-1.90916	4.11311e-10	4.3534e-09	SNORD3A
ABCA1	ENSG00000165029					11.4151	7.6822	12.2689	14.4267	54.0781	48.7982	63.7979	43.922					52.6491	11.4482	2.18868	5.97598e-10	6.18362e-09	ABCA1
RTP4	ENSG00000136514					4.15094	6.40183	17.8457	16.6462	47.5232	66.543	83.1306	53.5049					62.6754	11.2612	2.47067	6.25645e-10	6.4646e-09	RTP4
AC005256.1	ENSG00000267073					88.2074	128.037	101.497	104.316	31.9552	28.3917	52.1983	23.1589					33.926	105.514	-1.64473	6.47973e-10	6.68578e-09	AC005256.1
PGBD5	ENSG00000177614					26.9811	48.6539	36.8068	27.7436	159.776	125.101	86.0305	90.2397					115.287	35.0463	1.72876	7.69626e-10	7.85525e-09	PGBD5
BTBD19	ENSG00000222009					75.7546	53.7754	98.1514	36.6215	1.63873	15.9703	1.93327	11.1801					7.68062	66.0757	-3.09896	8.12879e-10	8.25794e-09	BTBD19
AC117394.2	ENSG00000244268					21.7924	52.495	31.23	31.0728	4.91619	2.66172	1.93327	4.79149					3.57567	34.1476	-3.22389	9.43435e-10	9.4999e-09	AC117394.2
FTH1P23	ENSG00000242960					63.3018	65.2987	56.8832	86.56	22.1229	23.9555	15.4662	19.166					20.1776	68.0109	-1.74946	1.21355e-09	1.21021e-08	FTH1P23
MASP2	ENSG00000009724					26.9811	38.411	34.5761	18.8656	4.09683	2.66172	2.89991	1.59716					2.8139	29.7084	-3.39923	1.61989e-09	1.59351e-08	MASP2
SLC35D1	ENSG00000116704					124.528	67.8594	94.8053	120.962	43.4263	33.7151	32.8656	32.7418					35.6872	102.039	-1.51823	2.84842e-09	2.73881e-08	SLC35D1
RPL7P19	ENSG00000241458					30.0943	21.7662	39.0375	17.7559	0.819365	1.77448	0.966635	3.19433					1.6887	27.1635	-3.98603	2.96003e-09	2.83985e-08	RPL7P19
AL031963.3	ENSG00000272277					50.849	74.2613	70.2675	61.0359	17.2067	13.3086	27.0658	9.58298					16.791	64.1034	-1.94478	4.43612e-09	4.15337e-08	AL031963.3
SLC9A9	ENSG00000181804					22.8302	40.9717	36.8068	48.8287	96.6851	86.0623	127.596	113.399					105.935	37.3593	1.50844	5.34385e-09	4.94153e-08	SLC9A9
C11orf91	ENSG00000205177					24.9056	58.8969	42.3836	33.2923	0	3.54896	8.69972	6.38865					4.65933	39.8696	-3.11411	6.24035e-09	5.72186e-08	C11orf91
ZNF750	ENSG00000141579					36.3207	34.5699	31.23	16.6462	2.4581	3.54896	1.93327	5.59007					3.3826	29.6917	-3.11383	1.02817e-08	9.17967e-08	ZNF750
AC022613.2	ENSG00000259523					70.5659	88.3453	83.6517	76.5723	10.6517	9.75965	34.7989	26.3532					20.3909	79.7838	-1.9752	1.2854e-08	1.13274e-07	AC022613.2
ERVK3-1	ENSG00000142396					41.5094	39.6914	43.4989	57.7067	11.4711	7.98517	3.86654	15.173					9.62397	45.6016	-2.22303	1.49946e-08	1.31022e-07	ERVK3-1
DQX1	ENSG00000144045					49.8112	99.8686	81.421	72.1333	29.4971	22.181	19.3327	24.756					23.9417	75.8085	-1.65216	1.58932e-08	1.38484e-07	DQX1
RNVU1-6	ENSG00000201558					34.2452	64.0183	13.3843	21.0851	3.27746	0.887241	3.86654	3.19433					2.80639	33.1832	-3.55782	1.77687e-08	1.53963e-07	RNVU1-6
TMC5	ENSG00000103534					23.8679	26.8877	18.9611	28.8533	61.4524	83.4006	59.9314	97.4269					75.5528	24.6425	1.62089	2.3179e-08	1.97225e-07	TMC5
CTSW	ENSG00000172543					28.0188	30.7288	45.7296	31.0728	1.63873	5.32344	5.79981	8.78439					5.38659	33.8875	-2.65241	2.56179e-08	2.16368e-07	CTSW
SLC52A1	ENSG00000132517					9.33961	6.40183	11.1536	18.8656	35.2327	73.641	57.9981	44.7206					52.8981	11.4402	2.19711	3.32335e-08	2.75762e-07	SLC52A1
ZNF304	ENSG00000131845					89.2451	64.0183	64.6907	96.5477	22.1229	36.3769	22.2326	28.7489					27.3703	78.6255	-1.52445	3.64813e-08	3.00988e-07	ZNF304
AL139393.2	ENSG00000272841					35.283	42.2521	44.6143	39.9508	15.5679	7.09792	7.73308	7.18723					9.39654	40.525	-2.09924	5.72524e-08	4.58948e-07	AL139393.2
SESN1	ENSG00000080546					21.7924	6.40183	13.3843	23.3046	44.2457	102.033	53.1649	78.261					69.4261	16.2208	2.08172	6.1423e-08	4.89949e-07	SESN1
ZNF37A	ENSG00000075407					111.038	42.2521	111.536	85.4503	36.8714	20.4065	18.3661	24.756					25.1	87.5689	-1.80098	6.66537e-08	5.29624e-07	ZNF37A
ZNF775	ENSG00000196456					24.9056	11.5233	14.4996	12.2072	58.1749	117.116	40.5987	56.6993					68.1472	15.7839	2.09933	9.71613e-08	7.57907e-07	ZNF775
C2orf15	ENSG00000273045					19.7169	10.2429	13.3843	11.0974	45.0651	52.3472	47.3651	47.1163					47.9734	13.6104	1.80366	1.30669e-07	1.00168e-06	C2orf15
ADM2	ENSG00000128165					79.9055	72.9809	51.3064	54.3774	29.4971	14.1958	12.5663	23.1589					19.8545	64.6426	-1.69092	2.05023e-07	1.52958e-06	ADM2
NBPF20	ENSG00000162825					126.604	81.9435	54.6525	77.6821	25.4003	18.6321	29.9657	37.5333					27.8828	85.2204	-1.61157	2.07602e-07	1.54829e-06	NBPF20
ABHD12B	ENSG00000131969					48.7735	39.6914	40.1528	51.0482	10.6517	14.1958	13.5329	15.9716					13.588	44.9165	-1.72702	2.11866e-07	1.57792e-06	ABHD12B
UCN2	ENSG00000145040					29.0566	28.1681	36.8068	25.5241	7.37429	7.09792	5.79981	3.99291					6.06623	29.8889	-2.3045	2.3051e-07	1.70484e-06	UCN2
CRISPLD2	ENSG00000103196					12.4528	11.5233	20.0764	11.0974	66.3686	83.4006	27.0658	51.9078					57.1857	13.7875	2.05224	2.79607e-07	2.04187e-06	CRISPLD2
CD86	ENSG00000114013					24.9056	14.084	23.4225	38.841	68.8267	66.543	72.4976	81.4553					72.3307	25.3133	1.50511	2.81215e-07	2.05223e-06	CD86
CXCL1	ENSG00000163739					2587.07	3223.96	2565.32	3018.5	932.437	408.131	1186.06	1044.54					892.793	2848.71	-1.67391	3.03354e-07	2.19757e-06	CXCL1
SIRPB2	ENSG00000196209					37.3584	30.7288	32.3453	27.7436	11.4711	4.4362	2.89991	6.38865					6.29897	32.044	-2.32645	3.47787e-07	2.50112e-06	SIRPB2
FLRT2	ENSG00000185070					83.0187	46.0932	72.4982	63.2554	27.8584	20.4065	28.0324	16.7702					23.2669	66.2164	-1.51823	3.82506e-07	2.73614e-06	FLRT2
RPS10P3	ENSG00000217716					54.9999	52.495	83.6517	97.6574	30.3165	25.73	15.4662	25.5546					24.2668	72.201	-1.56753	3.82751e-07	2.73627e-06	RPS10P3
LINC01138	ENSG00000274020					22.8302	17.9251	12.2689	22.1949	54.8975	45.2493	66.6978	61.4908					57.0838	18.8048	1.59704	3.9045e-07	2.78673e-06	LINC01138
MIR17HG	ENSG00000215417					34.2452	34.5699	39.0375	26.6338	10.6517	7.09792	3.86654	8.78439					7.60015	33.6216	-2.12749	3.96603e-07	2.82693e-06	MIR17HG
AL449106.1	ENSG00000273062					30.0943	42.2521	23.4225	28.8533	0.819365	4.4362	8.69972	7.18723					5.28563	31.1556	-2.57174	4.00983e-07	2.85441e-06	AL449106.1
AP001273.1	ENSG00000279696					38.3962	48.6539	47.9603	28.8533	4.09683	15.0831	2.89991	11.1801					8.31499	40.9659	-2.29033	4.19057e-07	2.97043e-06	AP001273.1
ANKHD1	ENSG00000131503					23.8679	28.1681	21.1918	17.7559	45.8844	70.9792	65.7312	75.0666					64.4154	22.7459	1.50657	4.38717e-07	3.09968e-06	ANKHD1
AC090114.2	ENSG00000273270					45.6603	40.9717	40.1528	35.5118	12.2905	7.09792	17.3994	6.38865					10.7941	40.5742	-1.92554	5.87124e-07	4.0845e-06	AC090114.2
AC007325.2	ENSG00000277196					195.094	325.213	362.491	319.606	34.4133	125.101	53.1649	65.4837					69.5407	300.601	-2.11225	6.00795e-07	4.16495e-06	AC007325.2
PAGR1	ENSG00000280789					76.7923	30.7288	95.9207	72.1333	22.9422	18.6321	11.5996	25.5546					19.6821	68.8938	-1.80305	6.23647e-07	4.30826e-06	PAGR1
LINC00346	ENSG00000255874					25.9434	30.7288	11.1536	28.8533	3.27746	3.54896	4.83318	1.59716					3.31419	24.1698	-2.88481	7.36319e-07	5.0149e-06	LINC00346
TNFAIP8	ENSG00000145779					210.66	58.8969	93.69	157.584	444.915	633.49	421.453	497.516					499.344	130.208	1.93675	1.02465e-06	6.85414e-06	TNFAIP8
EID3	ENSG00000255150					30.0943	28.1681	24.5378	36.6215	5.73556	10.6469	4.83318	5.59007					6.70142	29.8554	-2.15743	1.14412e-06	7.61345e-06	EID3
SH2B3	ENSG00000111252					25.9434	8.96257	41.2682	26.6338	76.2009	102.033	55.0982	90.2397					80.8929	25.702	1.64437	1.57602e-06	1.02645e-05	SH2B3
Z95331.1	ENSG00000280383					5.18867	8.96257	6.69214	8.87795	27.8584	28.3917	28.0324	46.3177					32.6501	7.43033	2.1495	1.59663e-06	1.03862e-05	Z95331.1
AL139385.1	ENSG00000275880					21.7924	44.8128	45.7296	32.1826	7.37429	4.4362	11.5996	11.1801					8.64756	36.1294	-2.05965	1.90504e-06	1.22785e-05	AL139385.1
MIR193BHG	ENSG00000262454					50.849	47.3736	47.9603	23.3046	13.9292	12.4214	7.73308	13.5759					11.9149	42.3719	-1.82067	1.9642e-06	1.26374e-05	MIR193BHG
SNHG14	ENSG00000224078					44.6226	48.6539	37.9221	44.3897	14.7486	11.5341	18.3661	16.7702					15.3547	43.8971	-1.51571	3.19082e-06	1.98479e-05	SNHG14
RFXAP	ENSG00000133111					25.9434	2.56073	17.8457	14.4267	45.8844	60.3324	54.1316	57.4979					54.4616	15.1941	1.81665	3.36001e-06	2.08288e-05	RFXAP
SH3TC2	ENSG00000169247					71.6037	28.1681	53.5371	31.0728	18.8454	8.87241	12.5663	7.98581					12.0675	46.0954	-1.93839	3.59694e-06	2.22152e-05	SH3TC2
AC119427.1	ENSG00000282221					17.6415	14.084	25.6532	32.1826	4.09683	6.21068	0.966635	1.59716					3.21783	22.3903	-2.7959	4.06553e-06	2.48272e-05	AC119427.1
AC027796.4	ENSG00000262903					50.849	17.9251	56.8832	29.9631	9.01302	7.09792	10.633	11.9787					9.68066	38.9051	-2.01172	4.41791e-06	2.6776e-05	AC027796.4
AC080023.1	ENSG00000254554					50.849	56.3361	54.6525	26.6338	18.026	11.5341	11.5996	18.3674					14.8818	47.1179	-1.65188	4.51215e-06	2.73015e-05	AC080023.1
SPNS2	ENSG00000183018					36.3207	32.0092	35.6914	34.4021	15.5679	8.87241	9.66635	7.98581					10.5231	34.6058	-1.71534	6.5284e-06	3.85254e-05	SPNS2
AC007255.1	ENSG00000223813					16.6037	23.0466	8.92285	6.65846	53.2587	47.911	36.7321	41.5262					44.857	13.8079	1.71521	8.14686e-06	4.73944e-05	AC007255.1
RDH16	ENSG00000139547					51.8867	28.1681	50.191	49.9385	17.2067	13.3086	20.2993	11.1801					15.4987	45.0461	-1.55213	9.20234e-06	5.30519e-05	RDH16
PRKCG	ENSG00000126583					10.3773	17.9251	7.8075	19.9754	52.4394	44.362	45.4319	32.7418					43.7438	14.0213	1.65032	9.90416e-06	5.68267e-05	PRKCG
AC005829.2	ENSG00000262539					42.5471	52.495	42.3836	22.1949	13.9292	8.87241	9.66635	15.9716					12.1099	39.9051	-1.70736	1.23931e-05	6.99061e-05	AC005829.2
FUT3	ENSG00000171124					8.30187	7.6822	12.2689	7.76821	24.581	33.7151	33.8322	34.339					31.6168	9.0053	1.80768	1.27249e-05	7.15017e-05	FUT3
AP000648.3	ENSG00000280385					62.264	47.3736	42.3836	51.0482	12.2905	31.0534	8.69972	12.7773					16.2052	50.7673	-1.6492	1.34661e-05	7.53343e-05	AP000648.3
AC055811.4	ENSG00000278864					43.5848	38.411	35.6914	26.6338	11.4711	15.9703	8.69972	10.3816					11.6307	36.0803	-1.63211	1.39924e-05	7.80469e-05	AC055811.4
GPBP1	ENSG00000062194					238.679	78.1024	196.303	250.802	511.284	637.039	531.649	505.502					546.368	190.972	1.51461	1.57755e-05	8.70896e-05	GPBP1
EEF1A1P13	ENSG00000250182					61.2263	35.8503	61.3446	54.3774	21.3035	26.6172	7.73308	18.3674					18.5053	53.1997	-1.51973	1.80383e-05	9.85806e-05	EEF1A1P13
CSF3	ENSG00000108342					29.0566	44.8128	47.9603	57.7067	9.83238	24.8427	12.5663	11.1801					14.6054	44.8841	-1.62323	2.17238e-05	0.000117109	CSF3
AP003352.1	ENSG00000245970					49.8112	28.1681	31.23	32.1826	9.83238	13.3086	8.69972	15.173					11.7534	35.348	-1.58747	3.7965e-05	0.00019512	AP003352.1
MYL7	ENSG00000106631					26.9811	40.9717	33.4607	52.1579	13.1098	12.4214	17.3994	11.1801					13.5277	38.3929	-1.50937	3.99178e-05	0.000203664	MYL7
LINC00941	ENSG00000285517					36.3207	30.7288	34.5761	37.7313	4.91619	18.6321	7.73308	12.7773					11.0147	34.8392	-1.66317	5.67549e-05	0.000281894	LINC00941
ACSM3	ENSG00000005187					10.3773	12.8037	4.46143	8.87795	24.581	28.3917	31.899	33.5404					29.603	9.1301	1.70566	6.6982e-05	0.000327675	ACSM3
AC138969.1	ENSG00000227827					32.1698	35.8503	75.8443	77.6821	10.6517	26.6172	23.1992	15.173					18.9103	55.3866	-1.55944	6.89934e-05	0.00033653	AC138969.1
LSMEM1	ENSG00000181016					32.1698	40.9717	40.1528	28.8533	7.37429	16.8576	4.83318	15.9716					11.2592	35.5369	-1.64627	7.56894e-05	0.00036705	LSMEM1
GAS2L2	ENSG00000270765					36.3207	46.0932	24.5378	26.6338	8.19365	14.1958	9.66635	12.7773					11.2083	33.3964	-1.56969	7.66812e-05	0.000371529	GAS2L2
PSAPL1	ENSG00000178597					25.9434	35.8503	57.9985	16.6462	11.4711	4.4362	11.5996	10.3816					9.47212	34.1096	-1.84571	8.99075e-05	0.000428826	PSAPL1
AL022315.1	ENSG00000225867					14.5283	12.8037	20.0764	25.5241	4.09683	4.4362	3.86654	3.99291					4.09812	18.2331	-2.1561	0.00010416	0.000491307	AL022315.1
ULBP3	ENSG00000131019					40.4716	16.6448	45.7296	24.4144	7.37429	7.09792	11.5996	13.5759					9.91193	31.8151	-1.68854	0.00015855	0.00072065	ULBP3
AL136040.1	ENSG00000273783					17.6415	16.6448	23.4225	19.9754	4.09683	2.66172	9.66635	1.59716					4.50552	19.421	-2.14123	0.000189468	0.000849111	AL136040.1
S1PR5	ENSG00000180739					101.698	19.2055	127.151	116.523	340.856	443.62	314.156	303.461					350.523	91.1443	1.94119	0.000201895	0.000899059	S1PR5
IL17C	ENSG00000124391					45.6603	40.9717	31.23	38.841	19.6648	3.54896	11.5996	18.3674					13.2952	39.1758	-1.54823	0.000203415	0.000905301	IL17C
AC010186.2	ENSG00000256594					7.26414	16.6448	7.8075	16.6462	40.9683	26.6172	39.632	29.5475					34.1913	12.0906	1.51274	0.000204013	0.000907187	AC010186.2
ZFP42	ENSG00000179059					24.9056	20.4859	25.6532	28.8533	4.91619	7.98517	6.76645	11.9787					7.91163	24.9745	-1.65467	0.00020615	0.000916126	ZFP42
LRRC29	ENSG00000125122					23.8679	42.2521	32.3453	38.841	13.1098	3.54896	16.4328	13.5759					11.6669	34.3266	-1.55392	0.000258803	0.00112236	LRRC29
RPL13AP7	ENSG00000213885					22.8302	26.8877	23.4225	18.8656	6.55492	11.5341	5.79981	3.99291					6.97044	23.0015	-1.72615	0.000272049	0.00117302	RPL13AP7
AC135050.6	ENSG00000278133					18.6792	16.6448	34.5761	24.4144	5.73556	12.4214	5.79981	3.19433					6.78776	23.5786	-1.80753	0.000404112	0.00167351	AC135050.6
KLHL23	ENSG00000213160					34.2452	11.5233	11.1536	28.8533	7.37429	4.4362	6.76645	2.39574					5.24317	21.4439	-2.04773	0.00040523	0.00167644	KLHL23
AC008687.4	ENSG00000268655					8.30187	2.56073	11.1536	12.2072	24.581	19.5193	21.266	46.3177					27.921	8.55584	1.69527	0.00065326	0.00257935	AC008687.4
DOK3	ENSG00000146094					30.0943	14.084	35.6914	28.8533	11.4711	11.5341	4.83318	10.3816					9.55499	27.1808	-1.50491	0.000793071	0.00306895	DOK3
PKD1P1	ENSG00000183889					17.6415	69.1398	24.5378	19.9754	11.4711	9.75965	6.76645	14.3745					10.5929	32.8236	-1.61184	0.00118081	0.00438816	PKD1P1
AC016727.1	ENSG00000270820					15.566	17.9251	15.615	13.3169	4.91619	1.77448	4.83318	7.18723					4.67777	15.6058	-1.72535	0.00222086	0.00767348	AC016727.1
AL136131.2	ENSG00000236961					25.9434	30.7288	15.615	15.5364	10.6517	7.98517	8.69972	2.39574					7.43309	21.9559	-1.56634	0.00223754	0.00772741	AL136131.2
RF00003	ENSG00000275405					4.15094	6.40183	4.46143	1.10974	0	0	0	0					0	4.03098	-4.65597	0.00239457	0.00820328	RF00003
TEX22	ENSG00000226174					17.6415	21.7662	21.1918	7.76821	3.27746	7.09792	7.73308	1.59716					4.92641	17.0919	-1.81502	0.00258128	0.00876554	TEX22
PGAM1P8	ENSG00000255200					12.4528	14.084	14.4996	15.5364	6.55492	2.66172	2.89991	4.79149					4.22701	14.1432	-1.72564	0.00297769	0.00993953	PGAM1P8
SUCLA2-AS1	ENSG00000227848					8.30187	6.40183	3.34607	9.98769	14.7486	13.3086	36.7321	19.166					20.9888	7.00937	1.57097	0.00381524	0.0123593	SUCLA2-AS1
AL356356.1	ENSG00000237781					20.7547	29.4484	12.2689	9.98769	0.819365	11.5341	0.966635	6.38865					4.92719	18.1149	-1.86943	0.00684693	0.0206998	AL356356.1
RF00003	ENSG00000275291					4.15094	1.28037	3.34607	2.21949	0	0	0	0					0	2.74922	-4.11859	0.0141713	0.0385636	RF00003
MID1IP1	ENSG00000165175					1278.09	1272.18	1454.06	1424.49					4001.76	3509.75	3660.88	3452.63	3656.26	1357.21	1.4296	9.33205e-43	2.31029e-40	MID1IP1
DNAJB1	ENSG00000132002					2231.1	1993.68	2280.21	2109.32					6823.01	5565.61	6028.46	5342.39	5939.87	2153.58	1.4635	1.34002e-39	2.76451e-37	DNAJB1
KRT5	ENSG00000186081					197390	256797	228102	215854					84247.6	79955.1	89055.4	73173.9	81608	224536	-1.46017	2.99306e-38	5.67415e-36	KRT5
SREBF1	ENSG00000072310					9457.5	12948.8	11703.1	10172.1					33722.4	29192.2	29822.1	30637.2	30843.5	11070.4	1.47836	1.73488e-35	2.85212e-33	SREBF1
SPINDOC	ENSG00000168005					421.839	458.703	505.444	507.934					1496.87	1343.71	1235.94	1259.58	1334.02	473.48	1.4947	3.38779e-35	5.4007e-33	SPINDOC
PTGS1	ENSG00000095303					1558.67	1718.94	1666.82	1547.59					687.329	638.694	720.704	649.091	673.954	1623.01	-1.26803	7.39242e-34	1.08782e-31	PTGS1
CTSV	ENSG00000136943					2165.31	2080.89	1874.4	2061.74					870.212	873.358	863.593	745.981	838.286	2045.58	-1.2878	6.01137e-33	8.21411e-31	CTSV
LYN	ENSG00000254087					349.275	273.549	286.453	345.519					929.15	884.581	906.355	831.056	887.786	313.699	1.49868	7.74421e-32	9.99763e-30	LYN
INPP1	ENSG00000151689					454.734	401.365	455.626	455.175					1235.11	1204.95	1111.82	1026.41	1144.57	441.725	1.37236	1.41793e-31	1.79744e-29	INPP1
PDIA5	ENSG00000065485					305.736	333.276	296.832	313.45					880.613	831.526	755.122	795.609	815.717	312.323	1.38624	1.85796e-31	2.28637e-29	PDIA5
GJB5	ENSG00000189280					1388.39	1391.64	1680.32	1661.39					514.846	494.835	614.319	590.011	553.503	1530.43	-1.46731	2.15829e-31	2.64051e-29	GJB5
AMBRA1	ENSG00000110497					392.813	373.89	428.641	417.933					1198.71	1032.52	964.763	1018.54	1053.63	403.32	1.3852	2.54533e-30	2.92686e-28	AMBRA1
NCOA7	ENSG00000111912					886.248	800.341	855.207	879.315					2494.49	2649.66	2595.99	1842.5	2395.66	855.278	1.48519	1.15636e-29	1.25429e-27	NCOA7
SLPI	ENSG00000124107					5030.13	6420.64	5010.85	5837.62					1797.63	2112.99	2402	1822.02	2033.66	5574.81	-1.45522	8.78044e-29	9.01301e-27	SLPI
NAMPT	ENSG00000105835					1017.83	768.088	771.14	910.35					2407.82	2567.02	2336.29	2007.93	2329.76	866.852	1.4253	5.21535e-28	5.02424e-26	NAMPT
DSP	ENSG00000096696					16117.9	15147.9	14985.8	12844.2					6362.77	6675.68	7190.35	6331.78	6640.15	14774	-1.15387	5.57868e-28	5.31186e-26	DSP
FASN	ENSG00000169710					12316.5	16299.5	17694.7	13454.6					39573	34100.7	42197.2	39642.6	38878.4	14941.3	1.3797	5.14666e-26	4.31479e-24	FASN
SIPA1	ENSG00000213445					456.669	588.907	531.391	495.52					1346.05	1216.17	1197.35	1189.47	1237.26	518.122	1.25735	5.73864e-26	4.77305e-24	SIPA1
PRSS8	ENSG00000052344					439.254	340.443	486.762	466.554					1294.05	1166.18	1039.86	1107.55	1151.91	433.253	1.40945	1.01093e-24	7.79229e-23	PRSS8
ARL8A	ENSG00000143862					332.827	274.744	436.944	404.485					1028.83	984.568	975.193	1084.71	1018.32	362.25	1.48999	2.49373e-24	1.87413e-22	ARL8A
TSC22D1	ENSG00000102804					4388.67	6117.23	4730.62	5008.99					1910.31	2026.27	2351.94	1893.71	2045.55	5061.38	-1.30719	2.61711e-24	1.9529e-22	TSC22D1
ATP8B1	ENSG00000081923					445.059	450.341	407.884	328.967					1118.1	1179.44	1215.08	916.131	1107.19	408.063	1.43976	2.9068e-24	2.16141e-22	ATP8B1
IRX4	ENSG00000113430					391.845	311.774	394.392	326.898					880.613	795.816	945.989	994.905	904.331	356.227	1.34304	7.47423e-24	5.46112e-22	IRX4
RGS3	ENSG00000138835					227.367	256.826	198.234	201.725					672.594	649.917	570.514	529.355	605.595	221.038	1.45543	8.13655e-24	5.92448e-22	RGS3
NCDN	ENSG00000020129					869.8	974.743	1075.24	1003.45					357.099	323.428	345.229	458.46	371.054	980.808	-1.39965	9.16401e-24	6.62674e-22	NCDN
AKAP13	ENSG00000170776					707.257	707.167	707.829	636.21					1367.72	1398.8	1533.19	1403.74	1425.86	689.616	1.04779	1.87828e-23	1.33982e-21	AKAP13
PTK2B	ENSG00000120899					375.398	447.952	473.27	504.83					1075.63	991.71	1074.28	1172.93	1078.64	450.362	1.26103	2.72586e-23	1.91841e-21	PTK2B
PPTC7	ENSG00000196850					555.356	432.423	561.489	491.382					1097.3	1273.31	1269.31	1161.9	1200.46	510.163	1.23274	4.34201e-23	2.98591e-21	PPTC7
PI4K2A	ENSG00000155252					536.973	458.703	585.36	516.21					1274.98	1152.91	1113.91	1158.75	1175.14	524.312	1.16357	5.40088e-23	3.67802e-21	PI4K2A
FAM110C	ENSG00000184731					175.121	152.901	144.264	147.932					393.502	442.8	390.077	415.134	410.378	155.055	1.40284	6.06354e-23	4.11597e-21	FAM110C
CAVIN3	ENSG00000170955					2426.54	3203.75	2432.77	2510.7					1255.05	1149.85	1089.92	1065.01	1139.96	2643.44	-1.21305	1.2592e-22	8.34765e-21	CAVIN3
LINP1	ENSG00000223784					342.502	369.112	309.286	297.933					113.544	124.474	120.986	112.646	117.912	329.708	-1.48468	3.00113e-22	1.96126e-20	LINP1
TUBB2A	ENSG00000137267					1602.21	2324.57	2319.65	1983.11					725.465	741.742	926.172	799.547	798.232	2057.39	-1.366	7.29693e-22	4.59729e-20	TUBB2A
C16orf91	ENSG00000174109					611.472	934.129	855.207	743.797					272.158	240.785	277.434	319.819	277.549	786.151	-1.4994	7.7622e-22	4.87582e-20	C16orf91
DNMBP	ENSG00000107554					264.133	198.293	248.052	205.863					668.26	582.578	530.88	628.61	602.582	229.085	1.39396	7.95932e-22	4.98476e-20	DNMBP
TNK1	ENSG00000174292					809.814	985.494	969.373	990.006					304.227	284.657	320.197	442.705	337.947	938.672	-1.47086	8.82235e-22	5.47637e-20	TNK1
KLF3	ENSG00000109787					413.131	309.385	472.232	430.347					1078.23	1051.91	974.15	967.334	1017.91	406.274	1.32329	1.3099e-21	8.03619e-20	KLF3
LOXL2	ENSG00000134013					1224.88	1850.34	1592.1	1332.42					3803.28	4066.83	4427.48	3210	3876.9	1499.93	1.37036	1.01396e-20	5.78231e-19	LOXL2
MEPCE	ENSG00000146834					1822.81	2010.41	2245.96	2018.29					593.72	599.923	742.607	987.027	730.819	2024.36	-1.46878	2.11233e-20	1.16973e-18	MEPCE
SF3B4	ENSG00000143368					3214.1	3884.64	4134.89	4167.95					1715.29	1663.05	1823.14	2031.56	1808.26	3850.39	-1.09002	9.97568e-20	5.27433e-18	SF3B4
SRGAP2	ENSG00000266028					402.488	428.839	363.255	364.14					968.154	891.723	847.948	760.948	867.193	389.681	1.15453	1.00493e-19	5.29994e-18	SRGAP2
POLR2L	ENSG00000177700					1543.19	1988.91	1941.86	2416.57					839.009	858.053	821.874	845.236	841.043	1972.63	-1.22967	1.13603e-19	5.94666e-18	POLR2L
SNRNP48	ENSG00000168566					157.706	136.177	131.81	163.449					336.297	379.543	395.292	382.05	373.295	147.286	1.33938	1.87279e-19	9.45063e-18	SNRNP48
KHDC4	ENSG00000132680					471.182	499.317	509.596	440.692					1117.23	1078.43	1074.28	879.108	1037.26	480.197	1.11085	2.18729e-19	1.09589e-17	KHDC4
CYTOR	ENSG00000222041					307.671	311.774	218.991	303.105					805.206	771.33	685.242	630.185	722.991	285.385	1.34126	2.29664e-19	1.14794e-17	CYTOR
TIMM8B	ENSG00000150779					661.783	708.361	707.829	755.177					341.497	287.718	299.337	359.205	321.94	708.288	-1.13474	2.62936e-19	1.29578e-17	TIMM8B
HOXC13	ENSG00000123364					126.745	88.3958	122.469	111.725					346.698	274.455	333.756	316.668	317.894	112.334	1.49693	4.4525e-19	2.15884e-17	HOXC13
PHF21A	ENSG00000135365					232.205	279.522	248.052	221.381					604.121	611.146	528.794	522.266	566.582	245.29	1.20951	5.11098e-19	2.46111e-17	PHF21A
SH2D3A	ENSG00000125731					562.129	437.201	553.186	482.072					1202.18	1009.05	1063.85	1241.46	1129.14	508.647	1.14996	6.34988e-19	3.02994e-17	SH2D3A
SPON2	ENSG00000159674					1809.26	2650.68	2159.81	1954.15					959.486	865.195	1022.13	917.707	941.129	2143.48	-1.18711	7.23684e-19	3.44536e-17	SPON2
TENT5B	ENSG00000158246					299.931	377.474	306.172	289.657					680.395	701.951	783.283	682.175	711.951	318.309	1.16287	8.07572e-19	3.83606e-17	TENT5B
EMSY	ENSG00000158636					195.439	151.706	163.984	174.829					474.109	461.165	484.989	360.781	445.261	171.489	1.37282	8.73192e-19	4.10147e-17	EMSY
FCHSD2	ENSG00000137478					238.977	241.297	197.196	192.415					558.184	547.889	541.31	451.37	524.688	217.471	1.27053	1.09753e-18	5.10956e-17	FCHSD2
MVK	ENSG00000110921					410.228	477.815	528.277	616.555					1457.86	1313.1	1071.15	1174.51	1254.15	508.219	1.3035	1.94797e-18	8.87254e-17	MVK
TFPI2	ENSG00000105825					407.326	462.286	380.899	439.658					845.943	974.365	1279.74	975.211	1018.82	422.542	1.26966	2.65708e-18	1.19681e-16	TFPI2
RILPL2	ENSG00000150977					189.634	183.959	151.529	204.829					507.046	478.51	410.937	411.983	452.119	182.488	1.30873	4.02563e-18	1.77708e-16	RILPL2
H1F0	ENSG00000189060					4245.48	3867.91	3308.74	3378.64					7073.5	7202.14	8289.66	7090.37	7413.92	3700.19	1.00254	4.02826e-18	1.77708e-16	H1F0
NRP2	ENSG00000118257					596.96	587.713	748.306	636.21					1297.52	1251.88	1366.31	1266.67	1295.6	642.297	1.01183	4.04988e-18	1.78288e-16	NRP2
RICTOR	ENSG00000164327					200.277	138.566	155.681	138.621					401.303	372.401	454.742	426.163	413.652	158.286	1.38271	6.23551e-18	2.68881e-16	RICTOR
TSSC4	ENSG00000184281					1220.04	1383.28	1688.62	1541.39					547.783	540.747	608.061	752.283	612.219	1458.33	-1.25109	6.47294e-18	2.78548e-16	TSSC4
TIPARP	ENSG00000163659					503.11	431.228	587.436	508.968					1220.38	1071.29	1053.42	1015.39	1090.12	507.686	1.10156	7.53778e-18	3.21739e-16	TIPARP
CEP170	ENSG00000143702					189.634	174.403	151.529	142.759					456.774	454.023	474.559	343.451	432.202	164.581	1.39129	8.4492e-18	3.57021e-16	CEP170
EPB41	ENSG00000159023					112.232	103.925	101.712	86.897					267.824	272.414	305.595	244.197	272.508	101.191	1.4271	9.03592e-18	3.81048e-16	EPB41
LNX2	ENSG00000139517					167.381	107.508	144.264	142.759					335.43	384.645	372.346	358.418	362.71	140.478	1.36314	1.82776e-17	7.52674e-16	LNX2
ADA	ENSG00000196839					308.639	434.812	330.044	326.898					917.883	906.006	930.344	679.812	858.511	350.098	1.29533	1.93405e-17	7.94885e-16	ADA
FAM3C	ENSG00000196937					609.537	332.082	482.611	467.589					1148.44	1317.18	1275.57	1126.46	1216.91	472.955	1.36112	1.98254e-17	8.13229e-16	FAM3C
LGALS9	ENSG00000168961					101.59	120.648	145.302	128.277					317.229	361.178	346.272	284.371	327.262	123.954	1.39981	2.95359e-17	1.18611e-15	LGALS9
MHENCR	ENSG00000232442					101.59	97.9521	103.787	103.449					320.696	262.211	274.306	230.805	272.004	101.694	1.4183	5.53225e-17	2.16547e-15	MHENCR
CXXC5	ENSG00000171604					228.335	138.566	203.423	223.45					598.054	506.058	470.387	509.662	521.04	198.443	1.38954	6.45602e-17	2.502e-15	CXXC5
NOV	ENSG00000136999					250.588	326.109	253.241	277.243					94.4752	120.393	105.342	91.3768	102.897	276.795	-1.43038	7.14082e-17	2.75209e-15	NOV
DHRS3	ENSG00000162496					641.465	940.101	965.222	861.729					2226.67	1987.5	1627.06	2337.99	2044.8	852.129	1.26384	1.82295e-16	6.71809e-15	DHRS3
TLE4	ENSG00000106829					144.16	101.536	125.583	121.035					314.628	329.55	300.38	282.008	306.641	123.078	1.31207	2.81673e-16	1.02018e-14	TLE4
SUSD6	ENSG00000100647					482.792	263.993	529.315	476.899					1340.85	1102.92	1251.58	1118.58	1203.48	438.25	1.45558	3.17648e-16	1.14261e-14	SUSD6
UBE2H	ENSG00000186591					1712.51	1538.57	1225.73	1328.28					2777.92	2966.97	2819.19	3069	2908.27	1451.27	1.00285	3.26916e-16	1.17194e-14	UBE2H
RAB8B	ENSG00000166128					94.8169	63.3105	83.0298	91.035					224.487	247.927	256.575	207.173	234.041	83.0481	1.48729	4.46256e-16	1.57824e-14	RAB8B
RFFL	ENSG00000092871					151.901	129.01	144.264	120.001					335.43	316.286	333.756	296.975	320.612	136.294	1.23174	4.47862e-16	1.58127e-14	RFFL
SLC9A3-AS1	ENSG00000225138					353.145	414.505	349.763	282.415					116.144	109.17	134.545	158.334	129.548	349.957	-1.42951	4.53074e-16	1.59432e-14	SLC9A3-AS1
RSF1	ENSG00000048649					280.581	211.433	204.461	251.381					584.186	622.369	532.966	478.153	554.419	236.964	1.22363	5.36372e-16	1.87179e-14	RSF1
SETD7	ENSG00000145391					365.722	273.549	332.119	319.657					112.677	128.555	139.76	144.943	131.484	322.762	-1.29708	8.00165e-16	2.76031e-14	SETD7
SMAD6	ENSG00000137834					71.5965	71.6723	81.992	76.5522					251.356	203.035	186.695	200.871	210.489	75.4532	1.48092	8.49075e-16	2.9147e-14	SMAD6
KRT17	ENSG00000128422					82500.4	123429	108031	106362					40701.5	44969.8	58394.7	44791.2	47214.3	105081	-1.15421	1.18677e-15	4.00842e-14	KRT17
PEX13	ENSG00000162928					322.184	179.181	258.43	256.553					685.595	669.302	617.448	568.742	635.272	254.087	1.31846	1.2823e-15	4.29672e-14	PEX13
CERK	ENSG00000100422					581.479	802.73	608.193	525.52					302.494	261.191	253.446	233.168	262.575	629.481	-1.26035	1.53154e-15	5.09134e-14	CERK
ARHGEF3	ENSG00000163947					126.745	88.3958	106.901	118.966					344.098	340.773	249.274	268.616	300.69	110.252	1.44365	1.64218e-15	5.42485e-14	ARHGEF3
INTS5	ENSG00000185085					871.735	980.716	1300.45	1023.11					331.963	285.678	356.701	533.294	376.909	1044	-1.46755	2.10796e-15	6.87717e-14	INTS5
SHB	ENSG00000107338					84.1742	81.2286	89.2571	95.1729					245.289	207.116	207.554	233.956	223.479	87.4582	1.35424	2.45379e-15	7.95609e-14	SHB
MTATP6P1	ENSG00000248527					4587.98	4591.8	4589.47	8017.29					1841.83	1708.96	2551.15	1769.24	1967.8	5446.64	-1.46903	3.18294e-15	1.01946e-13	MTATP6P1
RAPGEF5	ENSG00000136237					273.808	200.682	263.62	270.002					569.451	541.767	590.33	493.12	548.667	252.028	1.11903	3.27763e-15	1.04819e-13	RAPGEF5
CIR1	ENSG00000138433					149.966	99.1467	106.901	170.691					432.506	377.503	333.756	333.21	369.244	131.676	1.48414	3.34541e-15	1.06663e-13	CIR1
SLC25A28	ENSG00000155287					581.479	444.368	665.276	643.452					1470	1251.88	1122.25	1293.45	1284.4	583.644	1.13721	4.53888e-15	1.42555e-13	SLC25A28
TNFRSF12A	ENSG00000006327					3563.37	5336	4587.4	4392.44					1583.54	1751.82	2246.59	2267.88	1962.46	4469.8	-1.18736	4.71262e-15	1.47571e-13	TNFRSF12A
NIPAL4	ENSG00000172548					204.147	121.843	182.666	162.415					388.302	438.719	444.312	386.776	414.527	167.767	1.29973	4.77222e-15	1.48994e-13	NIPAL4
MYD88	ENSG00000172936					2705.18	3872.69	3479.99	3268.98					1149.3	1391.66	1865.9	1286.37	1423.31	3331.71	-1.22746	5.40714e-15	1.67327e-13	MYD88
LMTK3	ENSG00000142235					66.7589	80.0341	91.3328	70.3452					212.352	176.508	250.317	226.079	216.314	77.1177	1.49009	6.61659e-15	2.03445e-13	LMTK3
TTK	ENSG00000112742					231.237	166.041	159.832	247.243					509.646	544.828	465.172	452.945	493.148	201.088	1.29138	7.02249e-15	2.15101e-13	TTK
MAFB	ENSG00000204103					2120.8	2857.34	2030.08	2085.53					1046.16	1035.58	1236.98	885.41	1051.03	2273.44	-1.11341	9.0939e-15	2.75342e-13	MAFB
STX1A	ENSG00000106089					133.518	224.573	251.165	167.587					533.048	522.382	482.903	489.181	506.879	194.211	1.38671	9.57236e-15	2.88583e-13	STX1A
TRIM25	ENSG00000121060					1578.99	1469.28	1672.01	1436.9					382.234	459.125	583.03	822.391	561.695	1539.3	-1.45339	1.02065e-14	3.06385e-13	TRIM25
CSF1	ENSG00000184371					111.265	69.2832	114.166	124.139					300.76	276.495	260.747	279.645	279.412	104.713	1.4111	1.25236e-14	3.72223e-13	CSF1
C11orf68	ENSG00000175573					4580.24	7181.56	5949.09	5301.75					2272.6	2381.33	3103.93	2664.11	2605.49	5753.16	-1.14276	1.45398e-14	4.29721e-13	C11orf68
C18orf25	ENSG00000152242					344.437	223.379	292.68	303.105					646.592	655.018	605.975	601.827	627.353	290.9	1.10574	1.54015e-14	4.53913e-13	C18orf25
ENC1	ENSG00000171617					443.124	476.621	541.77	444.83					155.147	161.204	248.231	212.687	194.317	476.586	-1.29512	1.659e-14	4.86895e-13	ENC1
HSD17B7	ENSG00000132196					106.427	72.8668	94.4464	108.621					275.625	312.205	230.5	224.503	260.708	95.5904	1.44209	1.90666e-14	5.55704e-13	HSD17B7
STC2	ENSG00000113739					1156.19	1212.46	1458.21	1172.08					322.429	381.584	473.516	667.996	461.381	1249.73	-1.43627	1.99573e-14	5.79257e-13	STC2
FSTL3	ENSG00000070404					3028.34	5099.48	4116.2	3524.5					1716.15	1666.11	1942.04	1852.74	1794.26	3942.13	-1.13532	2.54008e-14	7.30204e-13	FSTL3
SEC24D	ENSG00000150961					232.205	261.604	186.817	196.553					593.72	584.619	553.826	399.38	532.886	219.295	1.28133	2.58227e-14	7.40311e-13	SEC24D
MRPS24	ENSG00000062582					326.054	518.43	486.762	366.209					144.746	174.467	188.781	133.914	160.477	424.364	-1.40531	2.66665e-14	7.62423e-13	MRPS24
ATF2	ENSG00000115966					180.926	137.372	129.734	140.69					364.9	408.111	381.733	289.885	361.157	147.181	1.29107	2.81693e-14	8.03207e-13	ATF2
LGR4	ENSG00000205213					220.594	101.536	195.12	185.173					427.305	497.895	545.482	488.393	489.769	175.606	1.47482	3.24821e-14	9.21188e-13	LGR4
HNRNPAB	ENSG00000197451					3063.17	2926.62	2807.45	3037.26					1230.78	1215.15	1470.61	1835.41	1437.99	2958.62	-1.04033	3.75074e-14	1.05376e-12	HNRNPAB
RNF19B	ENSG00000116514					402.488	260.409	544.883	466.554					1281.92	1107	909.484	1161.12	1114.88	418.584	1.41226	4.6274e-14	1.28632e-12	RNF19B
PER1	ENSG00000179094					841.742	1198.12	1097.03	956.902					2440.75	1965.05	1894.06	2041.01	2085.22	1023.45	1.02775	4.76224e-14	1.31971e-12	PER1
PHF3	ENSG00000118482					359.917	277.133	253.241	303.105					663.926	655.018	602.846	571.105	623.224	298.349	1.06092	5.3735e-14	1.48197e-12	PHF3
IFNGR2	ENSG00000159128					200.277	169.624	176.438	188.277					470.642	488.713	381.733	343.451	421.135	183.654	1.19505	6.17147e-14	1.69508e-12	IFNGR2
AP002387.1	ENSG00000254682					129.648	166.041	118.318	129.311					404.77	417.293	294.122	288.31	351.124	135.829	1.37254	6.17844e-14	1.69508e-12	AP002387.1
RTN4R	ENSG00000040608					86.1092	62.116	76.8026	90.0005					240.088	203.035	183.566	210.324	209.253	78.7571	1.40666	6.67523e-14	1.82391e-12	RTN4R
EIF5	ENSG00000100664					5244.92	4491.46	5074.16	4907.61					1738.69	1985.46	2500.04	2890.97	2278.79	4929.54	-1.11307	7.34354e-14	1.9888e-12	EIF5
MT-ND3	ENSG00000198840					11365.5	9957.67	8740.96	11099					3819.74	4290.27	6190.13	4755.53	4763.92	10290.8	-1.11129	8.63818e-14	2.31854e-12	MT-ND3
ACTB	ENSG00000075624					65520.4	82088.7	83171	79803.6					29320.2	35081.2	46297.1	39736.3	37608.7	77645.9	-1.04585	1.59647e-13	4.16806e-12	ACTB
CHAC1	ENSG00000128965					783.691	1291.3	814.73	820.349					335.43	429.537	425.539	346.602	384.277	927.517	-1.27166	1.78546e-13	4.62133e-12	CHAC1
CEACAM6	ENSG00000086548					182.861	117.065	168.135	111.725					331.963	368.32	491.247	362.356	388.472	144.947	1.41799	2.17086e-13	5.57091e-12	CEACAM6
ARHGAP5	ENSG00000100852					208.017	126.621	220.029	183.104					492.311	515.24	700.887	375.748	521.047	184.443	1.49408	2.27533e-13	5.81771e-12	ARHGAP5
RRP9	ENSG00000114767					673.394	759.726	884.268	870.005					329.363	325.469	290.993	461.61	351.859	796.848	-1.17655	2.36395e-13	6.02287e-12	RRP9
EXOC3L4	ENSG00000205436					79.3366	131.399	75.7647	84.8281					261.757	285.678	258.661	212.687	254.696	92.8321	1.46151	2.53781e-13	6.4341e-12	EXOC3L4
ZXDB	ENSG00000198455					302.834	354.778	303.059	289.657					123.078	133.656	158.534	152.032	141.825	312.582	-1.13947	2.73637e-13	6.91254e-12	ZXDB
PPIF	ENSG00000108179					3558.54	4478.32	4682.88	4376.92					1252.45	1338.6	1839.83	2422.27	1713.29	4274.17	-1.31847	3.03452e-13	7.63819e-12	PPIF
BNIP1	ENSG00000113734					110.297	106.314	62.2724	106.552					266.957	248.948	233.629	248.923	249.614	96.359	1.37421	4.96474e-13	1.21763e-11	BNIP1
MRPL57	ENSG00000173141					714.029	809.897	689.148	819.315					375.3	303.022	343.143	450.582	368.012	758.097	-1.03957	5.89286e-13	1.43196e-11	MRPL57
RBPMS	ENSG00000157110					102.557	151.706	112.09	110.69					299.027	293.84	290.993	241.833	281.423	119.261	1.24241	6.60645e-13	1.60345e-11	RBPMS
MBIP	ENSG00000151332					80.3041	50.1706	79.9162	87.9315					231.421	186.711	204.425	186.692	202.312	74.5806	1.43371	7.28546e-13	1.7561e-11	MBIP
IL23A	ENSG00000110944					88.0443	103.925	81.992	99.3109					244.422	231.603	237.801	186.692	225.13	93.318	1.27124	8.57118e-13	2.05425e-11	IL23A
NR4A1	ENSG00000123358					1354.53	2355.63	1898.27	1662.42					544.316	582.578	981.451	696.354	701.175	1817.71	-1.37456	8.61822e-13	2.06318e-11	NR4A1
MT-CYB	ENSG00000198727					53781.5	63348.7	56323.3	61162.1					23502.7	27399.6	38190	26430.7	28880.7	58653.9	-1.02215	9.31373e-13	2.2221e-11	MT-CYB
ARID4A	ENSG00000032219					71.5965	44.1979	57.083	71.3797					189.817	177.528	158.534	155.971	170.463	61.0643	1.47414	9.46805e-13	2.25126e-11	ARID4A
REV1	ENSG00000135945					184.796	120.648	182.666	151.035					401.303	334.651	394.249	334.786	366.247	159.786	1.19262	9.8821e-13	2.33913e-11	REV1
HECA	ENSG00000112406					165.446	108.703	122.469	108.621					269.558	299.962	302.466	358.418	307.601	126.31	1.28128	9.90619e-13	2.3422e-11	HECA
P2RY6	ENSG00000171631					111.265	175.597	163.984	142.759					357.099	323.428	324.369	326.908	332.951	148.401	1.17012	1.25499e-12	2.92779e-11	P2RY6
MIER1	ENSG00000198160					157.706	105.119	123.507	146.897					303.361	285.678	304.552	298.55	298.035	133.307	1.15646	1.32653e-12	3.08786e-11	MIER1
AFTPH	ENSG00000119844					245.75	113.481	204.461	210.001					526.981	542.788	478.731	442.705	497.801	193.423	1.35931	1.47979e-12	3.41815e-11	AFTPH
SEC24A	ENSG00000113615					133.518	90.7849	115.204	139.656					325.029	274.455	275.348	256.013	282.711	119.791	1.23463	1.75512e-12	4.01881e-11	SEC24A
CXCL1	ENSG00000163739					2412.03	3007.85	2387.11	2813.81					1106.83	1512.05	1546.75	1123.3	1322.23	2655.2	-1.00653	2.02738e-12	4.59722e-11	CXCL1
HIST1H2BD	ENSG00000158373					227.367	290.273	260.506	288.622					96.2087	98.9669	133.502	126.037	113.679	266.692	-1.22918	2.06431e-12	4.67089e-11	HIST1H2BD
MED18	ENSG00000130772					375.398	388.225	408.922	315.519					95.3419	92.8453	161.663	181.966	132.954	372.016	-1.48195	2.13576e-12	4.8222e-11	MED18
FBXO32	ENSG00000156804					80.3041	75.2559	77.8405	114.828					237.488	203.035	228.414	200.871	217.452	87.0572	1.31866	2.51416e-12	5.60438e-11	FBXO32
ADGRF1	ENSG00000153292					346.372	232.935	240.786	310.347					741.067	579.518	542.353	616.794	619.933	282.61	1.13196	3.19467e-12	7.01727e-11	ADGRF1
IRF1	ENSG00000125347					487.63	309.385	503.368	475.865					1046.16	894.783	858.378	952.367	937.922	444.062	1.07726	3.57974e-12	7.78991e-11	IRF1
TAF1A	ENSG00000143498					60.9537	43.0034	60.1966	44.483					151.68	147.94	126.201	150.457	144.07	52.1592	1.46199	5.44403e-12	1.17016e-10	TAF1A
LINC01133	ENSG00000224259					230.27	260.409	187.855	234.829					115.277	88.7641	69.8801	89.0136	90.7337	228.341	-1.32618	5.61725e-12	1.20493e-10	LINC01133
PSRC1	ENSG00000134222					394.748	433.617	368.445	464.485					1123.3	899.885	743.65	737.316	876.038	415.324	1.07729	5.67783e-12	1.21545e-10	PSRC1
PPFIA3	ENSG00000177380					125.778	177.986	153.605	163.449					372.7	315.266	312.896	315.88	329.186	155.205	1.08852	6.14014e-12	1.30909e-10	PPFIA3
IER5L	ENSG00000188483					1248.1	2132.25	1488.31	1328.28					3385.51	3015.94	3671.31	3078.45	3287.8	1549.24	1.08621	6.18499e-12	1.31732e-10	IER5L
SOX7	ENSG00000171056					223.497	167.235	199.272	161.38					383.101	364.239	377.561	426.95	387.963	187.846	1.04496	6.541e-12	1.38892e-10	SOX7
CRY1	ENSG00000008405					66.7589	66.8941	50.8558	65.1728					157.748	182.63	171.05	137.853	162.32	62.4204	1.37672	6.58765e-12	1.39742e-10	CRY1
CDYL	ENSG00000153046					178.024	120.648	169.173	153.104					337.164	336.692	317.068	319.031	327.489	155.237	1.07289	7.13017e-12	1.50341e-10	CDYL
CDR2	ENSG00000140743					214.789	162.457	317.589	202.76					526.114	532.585	508.978	505.723	518.35	224.399	1.20581	1.1042e-11	2.278e-10	CDR2
ARNTL	ENSG00000133794					89.0118	97.9521	94.4464	67.2418					195.018	237.725	264.919	180.39	219.513	87.163	1.3312	1.51303e-11	3.07027e-10	ARNTL
ADPRM	ENSG00000170222					67.7264	62.116	88.2192	76.5522					243.555	183.65	160.62	178.815	191.66	73.6534	1.37932	1.51721e-11	3.07578e-10	ADPRM
AC004233.2	ENSG00000270168					150.933	188.737	199.272	186.208					71.0731	41.8314	66.7512	82.7118	65.5918	181.287	-1.4576	1.64797e-11	3.33765e-10	AC004233.2
L1CAM	ENSG00000198910					119.972	125.427	150.492	120.001					46.8042	38.7705	52.1493	51.2025	47.2317	128.973	-1.44667	1.766e-11	3.55277e-10	L1CAM
YEATS4	ENSG00000127337					233.172	113.481	127.658	191.38					519.18	551.97	387.991	371.021	457.541	166.423	1.4551	1.88422e-11	3.77616e-10	YEATS4
NIP7	ENSG00000132603					716.932	659.385	763.874	753.108					227.087	248.948	261.79	452.158	297.496	723.325	-1.279	1.97131e-11	3.92824e-10	NIP7
AC007325.2	ENSG00000277196					181.894	303.413	337.309	297.933					124.811	116.312	91.7828	81.924	103.707	280.137	-1.43362	1.97761e-11	3.93688e-10	AC007325.2
TXNIP	ENSG00000265972					1202.63	845.733	738.965	920.695					2861.99	2185.43	1861.73	1621.94	2132.77	927.005	1.20166	3.11495e-11	6.04128e-10	TXNIP
ARL5B	ENSG00000165997					224.465	155.29	146.34	155.173					354.499	361.178	391.12	347.389	363.547	170.317	1.09052	3.28247e-11	6.33698e-10	ARL5B
DUSP16	ENSG00000111266					48.376	48.9761	34.2498	55.8624					139.546	132.636	130.373	114.221	129.194	46.8661	1.46237	4.37201e-11	8.34848e-10	DUSP16
KCNK5	ENSG00000164626					195.439	244.88	327.968	234.829					731.533	459.125	507.935	645.94	586.133	250.779	1.22656	4.8105e-11	9.11137e-10	KCNK5
IL6	ENSG00000136244					901.728	1299.66	1099.11	1117.25					421.238	568.295	662.297	423.012	518.71	1104.44	-1.09181	5.49156e-11	1.03362e-09	IL6
PIK3C2B	ENSG00000133056					195.439	155.29	174.363	154.139					330.23	309.144	333.756	397.804	342.733	169.808	1.01278	6.58743e-11	1.23108e-09	PIK3C2B
ANXA10	ENSG00000109511					96.752	96.7576	104.825	108.621					276.492	239.765	224.242	182.754	230.813	101.739	1.18045	8.06011e-11	1.48649e-09	ANXA10
HCN3	ENSG00000143630					152.868	130.205	205.499	129.311					325.029	345.874	375.475	308.791	338.792	154.471	1.13021	8.24348e-11	1.51765e-09	HCN3
GTPBP8	ENSG00000163607					76.434	43.0034	67.4617	66.2073					183.75	172.427	142.889	157.546	164.153	63.2766	1.36852	8.54237e-11	1.56583e-09	GTPBP8
SLC35B3	ENSG00000124786					44.5059	45.3924	41.5149	62.0693					153.414	161.204	114.729	116.584	136.483	48.3706	1.49524	8.82754e-11	1.61529e-09	SLC35B3
SERTAD1	ENSG00000197019					1887.63	3553.75	2765.93	2557.26					947.352	1022.32	1589.51	1016.96	1144.04	2691.14	-1.23436	9.7857e-11	1.77824e-09	SERTAD1
PPIAP29	ENSG00000214975					171.251	188.737	139.075	184.139					60.6721	82.6425	70.9231	71.6835	71.4803	170.8	-1.2585	1.09559e-10	1.97995e-09	PPIAP29
NFIL3	ENSG00000165030					63.8563	70.4777	61.2345	93.104					183.75	203.035	164.792	157.546	177.281	72.1681	1.29591	1.10475e-10	1.99377e-09	NFIL3
TOX2	ENSG00000124191					58.0512	81.2286	72.6511	52.7589					188.084	146.92	236.758	148.881	180.161	66.1724	1.44756	1.17411e-10	2.1027e-09	TOX2
PELI1	ENSG00000197329					155.771	123.037	170.211	121.035					281.692	343.834	394.249	269.404	322.295	142.514	1.1729	1.18159e-10	2.1143e-09	PELI1
TMEM263	ENSG00000151135					141.258	78.8395	99.6358	98.2764					234.888	285.678	258.661	218.989	249.554	104.502	1.24868	1.26509e-10	2.24842e-09	TMEM263
GNA13	ENSG00000120063					222.53	97.9521	230.408	188.277					498.378	507.078	431.797	424.587	465.46	184.792	1.32869	1.58696e-10	2.78752e-09	GNA13
ZNF121	ENSG00000197961					293.158	292.662	307.21	282.415					79.7405	61.2166	127.244	154.395	105.649	293.862	-1.47166	1.74045e-10	3.03182e-09	ZNF121
PNPLA3	ENSG00000100344					31.9281	33.4471	44.6285	38.2761					104.009	98.9669	100.127	113.433	104.134	37.07	1.49117	1.9399e-10	3.34601e-09	PNPLA3
ARC	ENSG00000198576					89.9793	115.87	100.674	117.932					252.223	233.644	329.584	194.57	252.505	106.114	1.25023	1.9673e-10	3.38628e-09	ARC
C6orf136	ENSG00000204564					173.186	138.566	136.999	181.035					424.705	324.448	287.864	318.243	338.815	157.447	1.10481	2.10856e-10	3.60443e-09	C6orf136
ARID4B	ENSG00000054267					110.297	75.2559	69.5375	83.7936					189.817	207.116	201.296	185.117	195.837	84.721	1.20349	2.2273e-10	3.78835e-09	ARID4B
TMF1	ENSG00000144747					119.005	81.2286	108.977	110.69					212.352	235.684	221.113	227.654	224.201	104.975	1.08966	2.22876e-10	3.78835e-09	TMF1
SPOPL	ENSG00000144228					76.434	47.7815	80.9541	52.7589					143.88	169.366	179.394	168.574	165.303	64.4821	1.35129	2.43701e-10	4.10256e-09	SPOPL
AC079305.1	ENSG00000222043					130.615	249.658	166.06	189.311					70.2063	68.3586	78.224	48.0516	66.2101	183.911	-1.47654	2.69202e-10	4.48521e-09	AC079305.1
FOXK2	ENSG00000141568					483.76	284.3	518.936	446.899					943.885	833.567	907.398	863.353	887.051	433.474	1.03119	3.21256e-10	5.29796e-09	FOXK2
ECHDC3	ENSG00000134463					66.7589	74.0614	73.689	78.6211					170.749	206.096	170.007	140.216	171.767	73.2826	1.22699	3.60531e-10	5.89943e-09	ECHDC3
LPAR3	ENSG00000171517					119.972	103.925	101.712	81.7246					234.888	295.88	245.102	181.966	239.459	101.833	1.2301	3.66636e-10	5.99e-09	LPAR3
SEC24B	ENSG00000138802					166.413	106.314	171.249	159.311					342.364	372.401	307.681	278.857	325.326	150.822	1.1042	4.93116e-10	7.88498e-09	SEC24B
DSC2	ENSG00000134755					1517.07	802.73	1018.15	1060.35					442.907	426.476	524.622	611.279	501.321	1099.58	-1.13314	5.12148e-10	8.17689e-09	DSC2
LGALS7B	ENSG00000178934					2401.38	4008.87	2456.64	2709.33					1554.07	1524.29	1444.54	1107.55	1407.61	2894.06	-1.03983	6.61933e-10	1.03871e-08	LGALS7B
AREG	ENSG00000109321					1091.36	1757.17	1285.92	1273.46					546.916	564.213	854.206	453.733	604.767	1351.98	-1.16156	7.23651e-10	1.12966e-08	AREG
MEG3	ENSG00000214548					182.861	197.099	190.969	199.656					39.8703	52.0342	89.6969	93.74	68.8353	192.646	-1.48321	7.94906e-10	1.23357e-08	MEG3
WHAMM	ENSG00000156232					221.562	108.703	199.272	237.932					412.571	428.517	443.269	489.969	443.581	191.867	1.2056	8.03805e-10	1.24646e-08	WHAMM
CCNO	ENSG00000152669					85.1417	103.925	108.977	92.0695					240.955	184.67	197.124	206.386	207.284	97.5282	1.09143	8.67341e-10	1.3371e-08	CCNO
PRKCE	ENSG00000171132					44.5059	72.8668	52.9315	52.7589					186.35	142.839	126.201	128.4	145.948	55.7658	1.39605	9.08702e-10	1.39575e-08	PRKCE
ARMC5	ENSG00000140691					227.367	328.498	318.627	278.277					126.545	112.231	130.373	165.424	133.643	288.192	-1.10316	1.03306e-09	1.56732e-08	ARMC5
LIPE	ENSG00000079435					58.0512	54.9488	60.1966	64.1383					185.483	144.879	116.815	139.428	146.651	59.3337	1.3064	1.06468e-09	1.61297e-08	LIPE
ELF1	ENSG00000120690					302.834	126.621	281.264	283.45					589.386	644.815	626.835	531.719	598.189	248.542	1.26355	1.11462e-09	1.67776e-08	ELF1
ETV7	ENSG00000010030					67.7264	95.563	86.1434	87.9315					219.286	172.427	173.136	180.39	186.31	84.3411	1.14862	1.1334e-09	1.70237e-08	ETV7
MAP3K5	ENSG00000197442					80.3041	105.119	74.7268	66.2073					208.885	202.015	178.351	159.909	187.29	81.5894	1.20278	1.15421e-09	1.73115e-08	MAP3K5
MTF2	ENSG00000143033					119.972	41.8088	95.4843	113.794					280.825	261.191	220.07	252.862	253.737	92.7648	1.44527	1.68545e-09	2.47848e-08	MTF2
PCDH7	ENSG00000169851					1158.12	576.962	1409.43	1369.66					441.173	486.672	491.247	475.79	473.72	1128.54	-1.25315	1.8481e-09	2.6876e-08	PCDH7
F3	ENSG00000117525					1649.62	1439.42	1809.01	1415.18					457.641	614.207	804.143	985.452	715.361	1578.31	-1.14132	1.8612e-09	2.70478e-08	F3
LCOR	ENSG00000196233					178.024	87.2013	142.189	141.725					297.293	290.779	306.638	312.729	301.86	137.285	1.13138	1.94379e-09	2.81854e-08	LCOR
CDK17	ENSG00000059758					110.297	86.0067	87.1813	95.1729					177.683	206.096	196.082	204.81	196.168	94.6646	1.04788	1.94617e-09	2.81854e-08	CDK17
LINC01089	ENSG00000212694					316.379	476.621	502.33	310.347					108.343	97.9466	190.867	199.296	149.113	401.419	-1.42662	2.02972e-09	2.92946e-08	LINC01089
DHRS9	ENSG00000073737					195.439	101.536	201.347	191.38					51.1379	63.2572	64.6652	76.4099	63.8676	172.426	-1.43434	2.09481e-09	3.01512e-08	DHRS9
AIMP2	ENSG00000106305					796.269	721.501	978.714	923.798					414.304	353.016	314.982	564.016	411.579	855.07	-1.05248	2.17485e-09	3.12391e-08	AIMP2
CAMK2A	ENSG00000070808					63.8563	80.0341	63.3102	64.1383					131.745	179.569	153.319	152.82	154.363	67.8347	1.18843	2.34306e-09	3.34271e-08	CAMK2A
RSPRY1	ENSG00000159579					144.16	69.2832	127.658	111.725					273.025	252.009	253.446	251.286	257.441	113.207	1.17925	2.3615e-09	3.36663e-08	RSPRY1
SLC25A30	ENSG00000174032					130.615	60.9214	131.81	132.415					282.559	290.779	293.079	237.107	275.881	113.94	1.26919	2.36302e-09	3.36663e-08	SLC25A30
GJA1	ENSG00000152661					654.043	570.989	599.89	573.107					300.76	311.185	378.604	203.235	298.446	599.507	-1.01002	2.48453e-09	3.52543e-08	GJA1
SLC25A45	ENSG00000162241					110.297	109.898	128.696	106.552					25.1356	37.7503	57.3643	41.7498	40.5	113.861	-1.49924	2.75363e-09	3.87589e-08	SLC25A45
PHACTR2	ENSG00000112419					48.376	39.4198	36.3255	37.2416					90.1415	140.798	122.029	93.74	111.677	40.3407	1.46219	3.40722e-09	4.72943e-08	PHACTR2
FAM214B	ENSG00000005238					88.0443	81.2286	71.6132	76.5522					208.019	156.102	158.534	168.574	172.807	79.3596	1.12402	3.41262e-09	4.7338e-08	FAM214B
ICAM1	ENSG00000090339					62.8888	91.9794	92.3707	77.5866					198.485	190.792	199.21	145.73	183.554	81.2064	1.17824	3.63796e-09	5.0298e-08	ICAM1
KCP	ENSG00000135253					86.1092	156.484	132.848	124.139					44.204	44.8922	54.2353	45.6884	47.255	124.895	-1.40119	3.80033e-09	5.24052e-08	KCP
PCOLCE	ENSG00000106333					82.2392	123.037	70.5754	80.6901					241.822	173.447	250.317	182.754	212.085	89.1355	1.25542	3.82059e-09	5.26501e-08	PCOLCE
MN1	ENSG00000169184					324.119	166.041	283.339	251.381					78.007	99.9872	84.4819	137.853	100.082	256.22	-1.35441	3.95396e-09	5.43456e-08	MN1
TMCC1	ENSG00000172765					112.232	57.3378	87.1813	76.5522					211.486	198.954	193.996	172.513	194.237	83.3259	1.21343	4.07321e-09	5.59481e-08	TMCC1
TTC9	ENSG00000133985					74.499	47.7815	70.5754	50.6899					161.215	129.575	131.416	182.754	151.24	60.8865	1.3108	4.21217e-09	5.76311e-08	TTC9
USP43	ENSG00000154914					94.8169	69.2832	124.545	94.1385					226.22	192.832	198.167	222.14	209.84	95.6958	1.13022	4.36828e-09	5.95734e-08	USP43
CREB5	ENSG00000146592					203.179	341.638	235.597	276.208					121.344	94.8858	147.061	95.3155	114.652	264.156	-1.20467	4.71653e-09	6.40736e-08	CREB5
FOXD2-AS1	ENSG00000237424					70.6289	78.8395	64.3481	68.2762					182.016	120.393	181.48	162.273	161.54	70.5232	1.19885	5.0419e-09	6.80544e-08	FOXD2-AS1
POLR1A	ENSG00000068654					664.686	450.341	740.003	687.935					169.882	183.65	182.523	408.045	236.025	635.741	-1.42656	5.32587e-09	7.17033e-08	POLR1A
MEIS3	ENSG00000105419					92.8819	96.7576	101.712	95.1729					40.737	44.8922	32.3326	29.9338	36.9739	96.631	-1.39006	5.49632e-09	7.38092e-08	MEIS3
EGR3	ENSG00000179388					1040.08	1275.77	1226.77	966.212					333.697	411.172	740.521	534.87	505.065	1127.21	-1.15889	5.63721e-09	7.55565e-08	EGR3
TMEM150A	ENSG00000168890					327.989	347.611	451.475	376.554					124.811	157.123	189.824	228.442	175.05	375.907	-1.1012	5.93866e-09	7.93443e-08	TMEM150A
FOXJ1	ENSG00000129654					50.311	108.703	80.9541	66.2073					169.882	203.035	279.52	165.424	204.465	76.5438	1.42169	5.97402e-09	7.9766e-08	FOXJ1
CCDC186	ENSG00000165813					128.68	70.4777	102.749	79.6556					211.486	246.907	188.781	218.202	216.344	95.3907	1.17585	7.44839e-09	9.82674e-08	CCDC186
MT-TV	ENSG00000210077					81.2716	118.259	75.7647	67.2418					212.352	233.644	302.466	144.155	223.154	85.6343	1.38314	8.44712e-09	1.10268e-07	MT-TV
NR4A3	ENSG00000119508					123.843	215.017	196.158	166.553					47.671	73.46	89.6969	65.3817	69.0524	175.392	-1.34862	8.85633e-09	1.15182e-07	NR4A3
FAM122A	ENSG00000187866					154.803	126.621	190.969	205.863					56.3384	60.1964	50.0634	94.5277	65.2815	169.564	-1.37014	9.91082e-09	1.28183e-07	FAM122A
TBPL1	ENSG00000028839					93.8494	33.4471	64.3481	65.1728					167.282	190.792	142.889	187.48	172.111	64.2043	1.4142	1.13404e-08	1.44977e-07	TBPL1
PADI3	ENSG00000142619					28.0581	69.2832	48.78	55.8624					149.08	101.007	153.319	157.546	140.238	50.4959	1.48403	1.23746e-08	1.57436e-07	PADI3
SPOCD1	ENSG00000134668					58.0512	74.0614	68.4996	53.7934					152.547	132.636	141.846	129.976	139.251	63.6014	1.13455	1.71165e-08	2.12873e-07	SPOCD1
DENND4C	ENSG00000137145					122.875	124.232	100.674	97.2419					221.887	249.968	241.973	182.754	224.145	111.256	1.00891	1.74598e-08	2.16758e-07	DENND4C
RORA	ENSG00000069667					38.7008	48.9761	33.2119	32.0691					116.144	107.129	94.9118	82.7118	100.224	38.2395	1.39477	1.75578e-08	2.17847e-07	RORA
AC020916.1	ENSG00000267519					432.481	415.699	463.929	354.83					118.744	134.677	235.715	237.895	181.758	416.735	-1.1966	1.78666e-08	2.21548e-07	AC020916.1
SMIM3	ENSG00000256235					121.907	65.6996	120.393	117.932					270.424	249.968	183.566	266.253	242.553	106.483	1.18427	1.8034e-08	2.23361e-07	SMIM3
CDK5RAP3	ENSG00000108465					116.102	72.8668	114.166	74.4832					213.219	208.137	174.179	258.376	213.478	94.4046	1.17523	1.90167e-08	2.34428e-07	CDK5RAP3
HMCN1	ENSG00000143341					105.46	140.955	101.712	101.38					52.0047	38.7705	52.1493	37.8111	45.1839	112.377	-1.31409	2.09039e-08	2.55447e-07	HMCN1
JMY	ENSG00000152409					111.265	70.4777	74.7268	76.5522					175.082	181.609	168.964	183.541	177.299	83.2554	1.08592	2.22052e-08	2.70252e-07	JMY
STK17B	ENSG00000081320					90.9468	59.7269	97.56	95.1729					192.417	185.691	187.738	162.273	182.03	85.8517	1.07785	2.67133e-08	3.21768e-07	STK17B
RNF169	ENSG00000166439					61.9213	39.4198	69.5375	64.1383					167.282	121.413	139.76	126.037	138.623	58.7542	1.23292	3.89964e-08	4.59463e-07	RNF169
LHFPL2	ENSG00000145685					101.59	46.587	90.2949	78.6211					176.816	164.265	177.308	211.9	182.572	79.2732	1.19773	5.74742e-08	6.62338e-07	LHFPL2
RAB12	ENSG00000206418					129.648	56.1433	95.4843	94.1385					190.684	215.279	208.597	233.168	211.932	93.8534	1.16841	5.92797e-08	6.80907e-07	RAB12
MAPK6	ENSG00000069956					613.407	213.822	500.255	503.796					1087.76	1066.19	1121.21	918.495	1048.42	457.82	1.19339	6.31333e-08	7.21626e-07	MAPK6
ZNHIT2	ENSG00000174276					451.832	574.573	598.853	584.486					181.15	142.839	272.22	356.842	238.263	552.436	-1.21065	6.3337e-08	7.23561e-07	ZNHIT2
RALY-AS1	ENSG00000285230					135.453	123.037	144.264	102.414					29.4693	27.5475	55.2783	66.1694	44.6161	126.292	-1.49574	6.62407e-08	7.56323e-07	RALY-AS1
MAP3K14	ENSG00000006062					103.525	75.2559	141.151	121.035					259.157	237.725	213.812	207.173	229.467	110.242	1.05391	7.78087e-08	8.79339e-07	MAP3K14
FRK	ENSG00000111816					203.179	91.9794	146.34	173.794					406.503	389.746	288.907	288.31	343.367	153.823	1.15406	8.15918e-08	9.17162e-07	FRK
IGF2BP3	ENSG00000136231					114.167	69.2832	90.2949	95.1729					203.685	187.731	213.812	159.909	191.284	92.2296	1.04531	9.13459e-08	1.02081e-06	IGF2BP3
C8orf44	ENSG00000213865					35.7982	31.058	26.9847	25.8622					100.542	79.5816	62.5792	81.924	81.1568	29.9258	1.44139	1.12535e-07	1.23853e-06	C8orf44
CSPG4P10	ENSG00000276710					35.7982	39.4198	43.5907	36.2071					88.408	84.683	88.6539	110.282	93.0068	38.7539	1.26732	1.19937e-07	1.3104e-06	CSPG4P10
RNF38	ENSG00000137075					58.0512	34.6416	62.2724	69.3107					138.679	160.184	105.342	130.763	133.742	56.069	1.24799	1.61206e-07	1.72284e-06	RNF38
RBM47	ENSG00000163694					114.167	51.3651	70.5754	101.38					185.483	193.853	209.64	174.876	190.963	84.3719	1.17032	1.70356e-07	1.80868e-06	RBM47
AC004130.1	ENSG00000271133					199.309	193.515	143.226	182.07					71.9398	94.8858	103.256	88.2259	89.5768	179.53	-1.0067	1.78689e-07	1.89241e-06	AC004130.1
SLC38A2	ENSG00000134294					2637.46	2104.78	2323.8	2343.12					734.133	928.453	1798.11	1036.65	1124.34	2352.29	-1.06575	2.18023e-07	2.28024e-06	SLC38A2
CALML5	ENSG00000178372					103.525	100.341	96.5222	94.1385					32.0696	34.6894	58.4073	39.3866	41.1382	98.6316	-1.26887	2.31164e-07	2.40692e-06	CALML5
CYB561D2	ENSG00000114395					68.6939	76.4504	79.9162	110.69					33.803	33.6692	29.2036	34.6602	32.834	83.9377	-1.35128	2.39024e-07	2.47798e-06	CYB561D2
SLC39A10	ENSG00000196950					151.901	174.403	146.34	120.001					47.671	71.4194	80.31	74.0467	68.3618	148.161	-1.11768	2.66042e-07	2.73355e-06	SLC39A10
TRIM23	ENSG00000113595					54.1811	32.2525	53.9694	50.6899					113.544	105.089	103.256	110.282	108.043	47.7732	1.17063	3.04947e-07	3.1e-06	TRIM23
AC004057.1	ENSG00000196656					336.697	695.221	402.695	341.381					1056.56	1062.11	869.851	726.288	928.702	443.998	1.06642	3.41777e-07	3.43622e-06	AC004057.1
USP6NL	ENSG00000148429					92.8819	60.9214	85.1056	107.587					154.281	186.711	173.136	189.843	175.993	86.6239	1.01761	3.48886e-07	3.49434e-06	USP6NL
PGBD5	ENSG00000177614					25.1555	45.3924	34.2498	25.8622					94.4752	104.068	66.7512	79.5609	86.2139	32.665	1.41026	3.76573e-07	3.75377e-06	PGBD5
SH2B2	ENSG00000160999					51.2785	51.3651	61.2345	63.1038					150.814	129.575	106.385	106.344	123.279	56.7455	1.11877	3.801e-07	3.78177e-06	SH2B2
AC008894.3	ENSG00000279198					114.167	166.041	139.075	146.897					57.2052	66.318	85.5249	59.0798	67.032	141.545	-1.08227	4.11258e-07	4.06869e-06	AC008894.3
LINC00909	ENSG00000264247					79.3366	105.119	75.7647	76.5522					20.8019	28.5678	42.7625	36.2356	32.0919	84.1932	-1.3928	4.78242e-07	4.65274e-06	LINC00909
IKZF2	ENSG00000030419					39.6683	17.9181	24.9089	31.0347					97.0754	64.2775	79.267	74.0467	78.6667	28.3825	1.46087	5.13015e-07	4.94974e-06	IKZF2
AMH	ENSG00000104899					94.8169	195.904	150.492	81.7246					33.803	37.7503	60.4932	56.7166	47.1908	130.734	-1.46677	7.62e-07	7.11076e-06	AMH
NCK1	ENSG00000158092					166.413	63.3105	129.734	144.828					324.163	313.225	303.509	207.961	287.214	126.072	1.18182	7.62718e-07	7.1143e-06	NCK1
AL109614.1	ENSG00000276603					63.8563	86.0067	99.6358	62.0693					22.5354	29.588	39.6335	25.2074	29.2411	77.892	-1.42202	8.16049e-07	7.58151e-06	AL109614.1
LINC01011	ENSG00000244041					38.7008	37.0307	26.9847	34.1381					84.941	76.5208	83.4389	76.4099	80.3277	34.2136	1.23141	9.01422e-07	8.30863e-06	LINC01011
HOXA5	ENSG00000106004					70.6289	69.2832	106.901	75.5177					207.152	145.9	162.706	145.73	165.372	80.5827	1.03663	1.04012e-06	9.49141e-06	HOXA5
TMEM161B	ENSG00000164180					81.2716	50.1706	52.9315	65.1728					144.746	137.737	126.201	115.009	130.923	62.3866	1.06273	1.05569e-06	9.62519e-06	TMEM161B
THBS1	ENSG00000137801					5900.9	5508.02	7704.13	6265.9					1532.4	1712.03	2305	3510.13	2264.89	6344.74	-1.48599	1.05741e-06	9.63665e-06	THBS1
PRDM10	ENSG00000170325					63.8563	23.8908	53.9694	60.0003					131.745	144.879	131.416	94.5277	125.642	50.4292	1.30527	1.11603e-06	1.01009e-05	PRDM10
RAB30	ENSG00000137502					63.8563	25.0853	38.4013	51.7244					104.009	121.413	106.385	103.193	108.75	44.7668	1.26878	1.1951e-06	1.07106e-05	RAB30
GCNT1	ENSG00000187210					120.94	41.8088	97.56	87.9315					217.553	188.751	176.265	202.447	196.254	87.0601	1.16618	1.45251e-06	1.28102e-05	GCNT1
ZNF227	ENSG00000131115					53.2136	45.3924	55.0073	40.3451					109.21	128.555	114.729	79.5609	108.014	48.4896	1.14925	1.52793e-06	1.3408e-05	ZNF227
SH3RF1	ENSG00000154447					124.81	43.0034	106.901	102.414					209.752	216.299	184.609	241.046	212.926	94.2822	1.16956	1.57037e-06	1.37517e-05	SH3RF1
UTP3	ENSG00000132467					406.358	260.409	369.483	372.416					111.81	142.839	126.201	259.951	160.2	352.167	-1.13314	1.57806e-06	1.38075e-05	UTP3
MND1	ENSG00000121211					46.4409	37.0307	29.0604	43.4485					97.9422	118.352	92.8258	67.7449	94.2163	38.9951	1.2661	1.65684e-06	1.44011e-05	MND1
AL031058.1	ENSG00000261189					127.713	192.321	106.901	118.966					39.0035	68.3586	73.0091	56.7166	59.272	136.475	-1.20636	1.85197e-06	1.59652e-05	AL031058.1
UPK2	ENSG00000110375					61.9213	120.648	108.977	68.2762					29.4693	37.7503	36.5045	37.8111	35.3838	89.9556	-1.34293	1.96003e-06	1.68072e-05	UPK2
FTH1P8	ENSG00000219507					113.2	150.512	148.416	200.691					72.8066	45.9125	80.31	81.924	70.2383	153.205	-1.12069	2.12824e-06	1.81167e-05	FTH1P8
EFNB2	ENSG00000125266					470.215	576.962	687.072	476.899					180.283	205.076	355.658	352.116	273.283	552.787	-1.01581	2.15395e-06	1.82985e-05	EFNB2
GPBP1	ENSG00000062194					222.53	72.8668	182.666	233.794					436.839	382.604	338.971	467.125	406.385	177.964	1.18844	2.16709e-06	1.83953e-05	GPBP1
AL645608.7	ENSG00000272512					103.525	132.594	130.772	67.2418					26.8691	31.6286	56.3213	51.2025	41.5054	108.533	-1.38568	2.17213e-06	1.84307e-05	AL645608.7
KLF12	ENSG00000118922					44.5059	22.6962	29.0604	33.1036					82.3408	79.5816	71.9661	79.5609	78.3623	32.3415	1.26773	2.22535e-06	1.88178e-05	KLF12
PXYLP1	ENSG00000155893					33.8632	41.8088	22.8332	41.3795					107.476	93.8655	102.213	56.7166	90.0678	34.9712	1.36498	2.23589e-06	1.88879e-05	PXYLP1
PLEKHA6	ENSG00000143850					22.253	26.2798	28.0226	34.1381					79.7405	59.1761	62.5792	72.4713	68.4918	27.6734	1.31175	2.61102e-06	2.17685e-05	PLEKHA6
LINC01588	ENSG00000214900					79.3366	106.314	101.712	90.0005					38.1368	35.7097	57.3643	40.1743	42.8463	94.3406	-1.14164	3.01861e-06	2.48613e-05	LINC01588
LRIG2	ENSG00000198799					102.557	28.6689	58.1209	70.3452					160.348	144.879	153.319	170.15	157.174	64.923	1.26712	3.03001e-06	2.49356e-05	LRIG2
TOLLIP-AS1	ENSG00000255153					24.188	32.2525	26.9847	24.8277					63.2724	88.7641	58.4073	61.443	67.9717	27.0632	1.33157	3.06198e-06	2.51692e-05	TOLLIP-AS1
AK6	ENSG00000085231					82.2392	44.1979	93.4086	83.7936					156.014	187.731	135.588	153.608	158.235	75.9098	1.05321	3.24539e-06	2.65834e-05	AK6
TOB1-AS1	ENSG00000229980					81.2716	72.8668	67.4617	73.4487					23.4021	33.6692	30.2466	38.5988	31.4792	73.7622	-1.22684	3.44718e-06	2.80615e-05	TOB1-AS1
SLC2A3	ENSG00000059804					144.16	143.345	86.1434	98.2764					219.286	234.664	318.111	183.541	238.901	117.981	1.01639	3.49326e-06	2.83927e-05	SLC2A3
SLC9A9	ENSG00000181804					21.2854	38.2252	34.2498	45.5175					94.4752	105.089	77.181	66.9572	85.9255	34.8195	1.3061	3.5592e-06	2.8884e-05	SLC9A9
FOXN2	ENSG00000170802					74.499	46.587	64.3481	64.1383					126.545	152.021	100.127	133.127	127.955	62.3931	1.03125	3.65495e-06	2.95812e-05	FOXN2
CEP44	ENSG00000164118					46.4409	59.7269	58.1209	41.3795					110.077	111.21	90.7398	109.495	105.38	51.4171	1.04095	3.66019e-06	2.96122e-05	CEP44
AC100861.1	ENSG00000246582					47.4085	35.8361	60.1966	34.1381					79.7405	109.17	127.244	92.9523	102.277	44.3948	1.19652	3.84511e-06	3.09654e-05	AC100861.1
ZNF436-AS1	ENSG00000249087					41.6033	51.3651	22.8332	37.2416					100.542	77.5411	91.7828	85.8627	88.9323	38.2608	1.22321	4.14908e-06	3.31721e-05	ZNF436-AS1
NBPF20	ENSG00000162825					118.037	76.4504	50.8558	72.4142					24.2689	31.6286	31.2896	34.6602	30.4618	79.4394	-1.38503	4.21218e-06	3.36383e-05	NBPF20
NCOA2	ENSG00000140396					33.8632	31.058	28.0226	24.8277					67.6061	82.6425	88.6539	52.778	72.9201	29.4429	1.30196	4.2849e-06	3.41542e-05	NCOA2
LINC02551	ENSG00000254842					107.395	143.345	80.9541	122.07					22.5354	33.6692	64.6652	54.3535	43.8058	113.441	-1.37346	4.43145e-06	3.51891e-05	LINC02551
PTGER4	ENSG00000171522					142.225	187.542	168.135	130.346					40.737	55.095	114.729	55.1412	66.4254	157.062	-1.24858	5.06796e-06	3.96745e-05	PTGER4
AC241952.1	ENSG00000275131					57.0837	50.1706	57.083	51.7244					112.677	118.352	124.115	84.2872	109.858	54.0154	1.01819	5.1259e-06	4.00536e-05	AC241952.1
AP005264.1	ENSG00000267069					50.311	65.6996	59.1588	65.1728					20.8019	27.5475	28.1606	21.2687	24.4447	60.0855	-1.30462	6.03738e-06	4.65024e-05	AP005264.1
C15orf62	ENSG00000188277					16.4478	14.3345	28.0226	19.6553					55.4717	53.0544	57.3643	47.2639	53.2886	19.615	1.43559	7.38925e-06	5.61546e-05	C15orf62
DYRK2	ENSG00000127334					264.133	84.8122	232.484	238.967					433.372	418.314	399.464	484.455	433.901	205.099	1.07807	7.93111e-06	5.99908e-05	DYRK2
DQX1	ENSG00000144045					46.4409	93.174	75.7647	67.2418					20.8019	22.4461	36.5045	29.9338	27.4216	70.6553	-1.36372	8.76334e-06	6.5672e-05	DQX1
SRM	ENSG00000116649					1587.7	1557.68	1960.54	2302.77					574.652	545.848	506.892	1163.48	697.718	1852.17	-1.40783	1.02434e-05	7.58184e-05	SRM
SLC35D1	ENSG00000116704					116.102	63.3105	88.2192	112.759					35.5365	28.5678	34.4186	59.0798	39.4007	95.0978	-1.26354	1.14529e-05	8.39438e-05	SLC35D1
LINC01138	ENSG00000274020					21.2854	16.7235	11.4166	20.6898					51.1379	54.0747	36.5045	55.1412	49.2146	17.5288	1.48896	1.1634e-05	8.51231e-05	LINC01138
B3GNT2	ENSG00000170340					119.005	32.2525	104.825	120.001					193.284	241.806	212.769	222.14	217.5	94.0208	1.20359	1.1634e-05	8.51231e-05	B3GNT2
PLLP	ENSG00000102934					43.5384	47.7815	52.9315	33.1036					116.144	102.028	84.4819	76.4099	94.7659	44.3388	1.09686	1.2203e-05	8.8977e-05	PLLP
PGLYRP3	ENSG00000159527					100.622	151.706	96.5222	95.1729					49.4045	34.6894	73.0091	41.7498	49.7132	111.006	-1.16056	1.31186e-05	9.50602e-05	PGLYRP3
SALL4	ENSG00000101115					38.7008	37.0307	29.0604	44.483					81.474	96.9264	55.2783	115.009	87.1719	37.3187	1.2279	1.31973e-05	9.55646e-05	SALL4
TOE1	ENSG00000132773					81.2716	64.5051	124.545	124.139					32.0696	39.7908	37.5475	57.5044	41.7281	98.615	-1.23712	1.33974e-05	9.67806e-05	TOE1
CASC8	ENSG00000246228					67.7264	103.925	86.1434	87.9315					16.4682	27.5475	54.2353	37.0234	33.8186	86.4315	-1.35874	1.38438e-05	9.97652e-05	CASC8
AL162458.1	ENSG00000285796					110.297	87.2013	115.204	73.4487					21.6686	27.5475	64.6652	39.3866	38.317	96.5378	-1.34132	1.44488e-05	0.000103664	AL162458.1
SLURP2	ENSG00000283992					162.543	260.409	154.643	139.656					62.4056	88.7641	93.8688	107.919	88.2394	179.313	-1.01947	1.54527e-05	0.000110115	SLURP2
AC005256.1	ENSG00000267073					82.2392	119.454	94.4464	97.2419					36.4033	37.7503	43.8054	64.594	45.6382	98.3453	-1.09675	1.61074e-05	0.000114278	AC005256.1
NABP1	ENSG00000173559					256.393	158.874	258.43	226.553					64.1391	83.6628	112.643	162.273	105.679	225.062	-1.08871	1.7343e-05	0.000122023	NABP1
NKX2-8	ENSG00000136327					32.8957	11.9454	17.6438	37.2416					80.6073	77.5411	51.1063	64.594	68.4622	24.9316	1.44643	1.79339e-05	0.000125752	NKX2-8
FLRT2	ENSG00000185070					77.4016	43.0034	67.4617	58.9658					13.0012	15.3042	34.4186	26.7829	22.3767	61.7081	-1.4708	1.93071e-05	0.000134529	FLRT2
LYSMD3	ENSG00000176018					74.499	29.8635	59.1588	78.6211					105.743	148.961	148.104	124.462	131.817	60.5356	1.11262	1.96099e-05	0.000136413	LYSMD3
PNO1	ENSG00000115946					347.34	250.853	372.596	340.347					97.0754	136.717	98.0408	267.041	149.719	327.784	-1.12643	2.20256e-05	0.000151268	PNO1
SPATA13	ENSG00000182957					83.2067	37.0307	68.4996	47.5865					138.679	112.231	102.213	151.244	126.092	59.0809	1.08939	2.22335e-05	0.000152596	SPATA13
CYP4B1	ENSG00000142973					57.0837	97.9521	90.2949	56.8969					18.2016	47.953	25.0317	25.2074	29.0984	75.5569	-1.38289	2.5014e-05	0.000169933	CYP4B1
LEKR1	ENSG00000197980					59.0187	84.8122	89.2571	71.3797					24.2689	33.6692	47.9774	27.5706	33.3715	76.1169	-1.19915	2.52288e-05	0.000171144	LEKR1
FTH1P23	ENSG00000242960					59.0187	60.9214	52.9315	80.6901					32.0696	19.3853	31.2896	25.9951	27.1849	63.3904	-1.2196	2.84319e-05	0.000190479	FTH1P23
AC083841.1	ENSG00000253196					59.0187	40.6143	46.7043	47.5865					13.0012	25.5069	19.8167	16.5424	18.7168	48.4809	-1.3885	2.94802e-05	0.000196562	AC083841.1
UBAC2-AS1	ENSG00000228889					91.9144	106.314	70.5754	84.8281					39.8703	51.0139	37.5475	46.4761	43.7269	88.4079	-1.01283	3.04055e-05	0.000202283	UBAC2-AS1
CLK4	ENSG00000113240					40.6358	13.1399	32.1741	48.621					80.6073	81.6222	75.095	89.0136	81.5845	33.6427	1.26756	3.19335e-05	0.000211114	CLK4
LRAT	ENSG00000121207					79.3366	52.5597	87.1813	78.6211					26.0023	36.73	30.2466	41.7498	33.6822	74.4247	-1.14417	3.44643e-05	0.000225438	LRAT
IRAK2	ENSG00000134070					31.9281	32.2525	44.6285	20.6898					79.7405	72.4397	76.138	61.443	72.4403	32.3747	1.16052	3.60602e-05	0.000234854	IRAK2
CENPC	ENSG00000145241					41.6033	22.6962	39.4392	41.3795					88.408	83.6628	65.7082	74.8345	78.1533	36.2796	1.09953	3.67216e-05	0.000239014	CENPC
ZNF778	ENSG00000170100					100.622	90.7849	150.492	133.449					29.4693	19.3853	38.5905	86.6504	43.5239	118.837	-1.43749	3.82907e-05	0.000248612	ZNF778
AC084018.1	ENSG00000272849					99.6545	131.399	77.8405	80.6901					21.6686	35.7097	63.6222	44.1129	41.2784	97.3961	-1.24245	3.98627e-05	0.000257393	AC084018.1
EDN1	ENSG00000078401					135.453	158.874	134.923	126.208					34.6698	76.5208	99.0837	40.962	62.8091	138.864	-1.15559	4.10098e-05	0.000264228	EDN1
AOC3	ENSG00000131471					61.9213	88.3958	110.015	69.3107					19.0684	12.2433	40.6765	47.2639	29.813	82.4106	-1.45887	4.28781e-05	0.000275338	AOC3
AC092368.3	ENSG00000261512					12.5778	11.9454	16.606	13.4484					40.737	39.7908	36.5045	34.6602	37.9231	13.6444	1.47179	4.5266e-05	0.0002897	AC092368.3
SNORD3A	ENSG00000263934					62.8888	62.116	62.2724	77.5866					18.2016	24.4867	30.2466	40.962	28.4742	66.2159	-1.21152	4.65055e-05	0.00029691	SNORD3A
FUT8	ENSG00000033170					50.311	56.1433	47.7421	33.1036					85.8077	137.737	80.31	86.6504	97.6264	46.825	1.06018	5.67134e-05	0.000355926	FUT8
RPS10P3	ENSG00000217716					51.2785	48.9761	77.8405	91.035					28.6026	15.3042	20.8597	39.3866	26.0383	67.2825	-1.35493	5.78793e-05	0.000362454	RPS10P3
OVOL1-AS1	ENSG00000255120					61.9213	138.566	95.4843	79.6556					38.1368	39.7908	52.1493	43.3252	43.3505	93.9069	-1.11207	5.87041e-05	0.000367105	OVOL1-AS1
ADM2	ENSG00000128165					74.499	68.0887	47.7421	50.6899					28.6026	20.4055	32.3326	23.6319	26.2432	60.2549	-1.20103	5.92273e-05	0.000369938	ADM2
C14orf132	ENSG00000227051					94.8169	103.925	65.386	52.7589					49.4045	33.6692	15.6448	24.4197	30.7845	79.2217	-1.3568	6.0438e-05	0.000376383	C14orf132
AL162377.1	ENSG00000231856					50.311	75.2559	60.1966	91.035					21.6686	22.4461	44.8484	27.5706	29.1334	69.1996	-1.2538	6.3476e-05	0.000392745	AL162377.1
TNFAIP8	ENSG00000145779					196.406	54.9488	87.1813	146.897					330.23	260.171	235.715	230.018	264.033	121.358	1.11673	6.61435e-05	0.000407376	TNFAIP8
KIAA1958	ENSG00000165185					20.3179	13.1399	17.6438	17.5863					57.2052	39.7908	34.4186	46.4761	44.4727	17.172	1.3704	7.26534e-05	0.000441991	KIAA1958
SASH1	ENSG00000111961					24.188	39.4198	20.7575	26.8967					62.4056	74.4803	67.7941	48.0516	63.1829	27.8155	1.1887	7.3333e-05	0.000445352	SASH1
RDH16	ENSG00000139547					48.376	26.2798	46.7043	46.552					17.3349	11.2231	14.6018	18.9055	15.5163	41.978	-1.42985	7.92108e-05	0.000475423	RDH16
ZNF189	ENSG00000136870					66.7589	53.7542	51.8936	77.5866					28.6026	15.3042	26.0747	36.2356	26.5543	62.4983	-1.22373	7.96358e-05	0.000477733	ZNF189
EXO5	ENSG00000164002					48.376	46.587	50.8558	50.6899					15.6014	9.1825	15.6448	31.5092	17.9845	49.1272	-1.42785	8.1824e-05	0.000488876	EXO5
POLR2A	ENSG00000181222					6426.27	7016.72	10641.3	7493.84					2336.74	2154.83	3554.5	4851.64	3224.43	7894.53	-1.29173	8.29813e-05	0.000494808	POLR2A
AP000648.3	ENSG00000280385					58.0512	44.1979	39.4392	47.5865					13.0012	15.3042	14.6018	29.1461	18.0133	47.3187	-1.37934	9.43989e-05	0.000556269	AP000648.3
MYC	ENSG00000136997					2625.85	3933.61	4081.95	3067.26					835.542	970.284	2072.41	1632.97	1377.8	3427.17	-1.31468	9.45522e-05	0.000557016	MYC
PIK3R3	ENSG00000117461					39.6683	13.1399	39.4392	47.5865					81.474	63.2572	96.9978	84.2872	81.5041	34.9585	1.21092	0.000102028	0.000596215	PIK3R3
AC022613.2	ENSG00000259523					65.7913	82.4231	77.8405	71.3797					30.3361	28.5678	43.8054	44.1129	36.7056	74.3587	-1.01407	0.000102766	0.00060003	AC022613.2
BICRAL	ENSG00000112624					32.8957	13.1399	28.0226	22.7587					49.4045	60.1964	51.1063	67.7449	57.113	24.2042	1.22791	0.000114681	0.000661523	BICRAL
IL17C	ENSG00000124391					42.5709	38.2252	29.0604	36.2071					14.7347	19.3853	9.38688	8.66504	13.043	36.5159	-1.49478	0.000118331	0.00067978	IL17C
JADE3	ENSG00000102221					33.8632	21.5017	34.2498	25.8622					54.6049	69.3789	65.7082	57.5044	61.7991	28.8692	1.08778	0.000122373	0.00070147	JADE3
RNF224	ENSG00000233198					43.5384	78.8395	91.3328	45.5175					19.9351	27.5475	27.1177	33.8724	27.1182	64.8071	-1.25125	0.000131934	0.000750755	RNF224
TCTEX1D4	ENSG00000188396					72.564	119.454	81.992	54.8279					31.2028	43.8719	46.9344	31.5092	38.3796	82.2094	-1.10259	0.000141158	0.000797204	TCTEX1D4
EIF3J-DT	ENSG00000179523					47.4085	19.1126	35.2877	23.7932					66.7393	65.2978	67.7941	76.4099	69.0603	31.4005	1.12711	0.000154177	0.000862856	EIF3J-DT
EID2	ENSG00000176396					130.615	105.119	120.393	138.621					40.737	41.8314	59.4502	99.2541	60.3182	123.687	-1.02906	0.00015628	0.000873697	EID2
CD86	ENSG00000114013					23.2205	13.1399	21.7953	36.2071					49.4045	52.0342	81.353	48.8393	57.9077	23.5907	1.28295	0.000157689	0.000881059	CD86
AC090114.2	ENSG00000273270					42.5709	38.2252	37.3634	33.1036					9.53419	10.2028	11.4729	22.8442	13.5135	37.8158	-1.46563	0.000158991	0.000886968	AC090114.2
E2F5	ENSG00000133740					24.188	4.77815	19.7196	13.4484					52.8714	45.9125	37.5475	39.3866	43.9295	15.5335	1.48135	0.000167103	0.000925638	E2F5
AC090970.2	ENSG00000274528					50.311	65.6996	35.2877	53.7934					18.2016	17.3447	21.9027	29.1461	21.6488	51.2729	-1.23226	0.000179105	0.000986624	AC090970.2
ZNF304	ENSG00000131845					83.2067	59.7269	60.1966	90.0005					24.2689	26.5272	23.9887	53.5657	32.0876	73.2827	-1.17997	0.000180382	0.000992878	ZNF304
APOBEC3A	ENSG00000128383					92.8819	74.0614	77.8405	79.6556					38.1368	35.7097	60.4932	25.9951	40.0837	81.1098	-1.03018	0.000189435	0.00103728	APOBEC3A
BLNK	ENSG00000095585					15.4803	16.7235	18.6817	13.4484					43.3372	42.8517	33.3756	37.8111	39.3439	16.0835	1.293	0.000194686	0.00106162	BLNK
KLF9	ENSG00000119138					32.8957	17.9181	29.0604	12.4139					73.6733	64.2775	54.2353	37.8111	57.4993	23.072	1.30789	0.000200565	0.00108916	KLF9
CFAP45	ENSG00000213085					32.8957	39.4198	32.1741	38.2761					125.678	67.3383	55.2783	63.0185	77.8283	35.6914	1.13011	0.000208607	0.00112904	CFAP45
CLDN6	ENSG00000184697					89.0118	176.792	161.908	121.035					37.27	42.8517	77.181	96.1032	63.3515	137.187	-1.10905	0.000210199	0.00113678	CLDN6
PHF13	ENSG00000116273					302.834	146.928	326.93	293.795					104.876	87.7439	114.729	218.202	131.388	267.622	-1.02325	0.000211208	0.00114136	PHF13
ADAMTSL4-AS1	ENSG00000203804					37.7333	60.9214	69.5375	35.1726					9.53419	17.3447	25.0317	25.9951	19.4764	50.8412	-1.3819	0.000232915	0.00124176	ADAMTSL4-AS1
C2orf15	ENSG00000273045					18.3829	9.5563	12.4545	10.3449					30.3361	51.0139	25.0317	37.0234	35.8512	12.6846	1.48781	0.000249239	0.00131744	C2orf15
RF00003	ENSG00000270722					34.8307	62.116	45.6664	37.2416					17.3349	26.5272	16.6878	7.08958	16.9099	44.9637	-1.42404	0.000273235	0.00142885	RF00003
NAT1	ENSG00000171428					31.9281	25.0853	31.1362	28.9657					8.66745	7.14194	11.4729	14.1792	10.3654	29.2788	-1.48963	0.000311002	0.00160599	NAT1
NOL6	ENSG00000165271					827.229	567.406	1107.41	985.868					221.887	212.218	235.715	575.832	311.413	871.978	-1.48447	0.000312519	0.00161264	NOL6
TP53I3	ENSG00000115129					45.4734	58.5324	45.6664	45.5175					13.8679	23.4664	26.0747	25.2074	22.1541	48.7974	-1.14041	0.000348431	0.00177488	TP53I3
KYNU	ENSG00000115919					86.1092	96.7576	87.1813	56.8969					52.8714	41.8314	41.7195	20.481	39.2258	81.7363	-1.06399	0.000359512	0.00182602	KYNU
AL031963.3	ENSG00000272277					47.4085	69.2832	65.386	56.8969					18.2016	35.7097	28.1606	32.297	28.5922	59.7436	-1.06339	0.000364174	0.00184703	AL031963.3
ZNF37A	ENSG00000075407					103.525	39.4198	103.787	79.6556					16.4682	25.5069	15.6448	61.443	29.7657	81.5968	-1.44404	0.000367229	0.00185983	ZNF37A
ZNF775	ENSG00000196456					23.2205	10.7508	13.4923	11.3794					47.671	31.6286	29.2036	45.6884	38.5479	14.7108	1.38451	0.000369755	0.00187082	ZNF775
ABHD12B	ENSG00000131969					45.4734	37.0307	37.3634	47.5865					13.0012	16.3244	20.8597	22.8442	18.2574	41.8635	-1.19723	0.000413596	0.00206159	ABHD12B
CNIH2	ENSG00000174871					59.9862	114.676	90.2949	83.7936					39.8703	23.4664	66.7512	33.8724	40.9901	87.1876	-1.09077	0.000434652	0.00215159	CNIH2
CIRBP-AS1	ENSG00000267493					50.311	32.2525	68.4996	53.7934					11.2677	13.2636	15.6448	37.0234	19.2999	51.2141	-1.39333	0.000465873	0.00229051	CIRBP-AS1
AC007255.1	ENSG00000223813					15.4803	21.5017	8.30298	6.20693					42.4705	33.6692	31.2896	32.297	34.9316	12.873	1.45419	0.000475686	0.00233113	AC007255.1
PRKCG	ENSG00000126583					9.6752	16.7235	7.26511	18.6208					28.6026	34.6894	30.2466	44.9007	34.6098	13.0712	1.41731	0.000493965	0.0024106	PRKCG
LSMEM1	ENSG00000181016					29.9931	38.2252	37.3634	26.8967					8.66745	5.10139	16.6878	17.3301	11.9467	33.1196	-1.46002	0.000560838	0.00271054	LSMEM1
MIR31HG	ENSG00000171889					25.1555	52.5597	48.78	42.414					11.2677	20.4055	15.6448	22.0565	17.3436	42.2273	-1.27701	0.000562075	0.00271528	MIR31HG
IL20	ENSG00000162891					25.1555	40.6143	33.2119	47.5865					14.7347	12.2433	21.9027	7.08958	13.9926	36.6421	-1.40389	0.000576795	0.00277661	IL20
ERVK3-1	ENSG00000142396					38.7008	37.0307	40.477	53.7934					8.66745	8.16222	14.6018	30.7215	15.5382	42.5005	-1.43209	0.000600316	0.00287493	ERVK3-1
F8A1	ENSG00000277203					52.2461	29.8635	56.0451	55.8624					14.7347	16.3244	19.8167	32.297	20.7932	48.5043	-1.21504	0.000637116	0.00302228	F8A1
CARMN	ENSG00000249669					59.0187	107.508	98.5979	68.2762					18.2016	31.6286	68.8371	27.5706	36.5595	83.3503	-1.19859	0.00067092	0.00315984	CARMN
AC005076.1	ENSG00000224046					30.9606	39.4198	34.2498	37.2416					21.6686	5.10139	10.4299	15.7546	13.2386	35.4679	-1.39859	0.000678625	0.00319184	AC005076.1
POP1	ENSG00000104356					244.782	129.01	264.658	290.691					72.8066	45.9125	60.4932	148.881	82.0234	232.285	-1.49831	0.000689387	0.00323667	POP1
CSF3	ENSG00000108342					27.0905	41.8088	44.6285	53.7934					9.53419	14.2839	18.7738	25.2074	16.9498	41.8303	-1.29522	0.000696701	0.00326664	CSF3
ABCA1	ENSG00000165029					10.6427	7.16723	11.4166	13.4484					19.9351	25.5069	32.3326	40.1743	29.4872	10.6687	1.46172	0.000714283	0.00333792	ABCA1
SNHG14	ENSG00000224078					41.6033	45.3924	35.2877	41.3795					19.9351	18.365	12.5158	22.8442	18.415	40.9158	-1.13818	0.000724786	0.00338025	SNHG14
AC117394.2	ENSG00000244268					20.3179	48.9761	29.0604	28.9657					10.4009	9.1825	12.5158	14.9669	11.7665	31.83	-1.42007	0.000740624	0.00344267	AC117394.2
SH3TC2	ENSG00000169247					66.7589	26.2798	49.8179	28.9657					9.53419	11.2231	12.5158	28.3583	15.4079	42.9556	-1.4675	0.000751031	0.00348411	SH3TC2
AC073111.5	ENSG00000284691					24.188	11.9454	15.5681	26.8967					52.0047	33.6692	51.1063	42.5375	44.8294	19.6495	1.1803	0.000766197	0.00354821	AC073111.5
AC138969.1	ENSG00000227827					29.9931	33.4471	70.5754	72.4142					15.6014	11.2231	28.1606	26.7829	20.442	51.6074	-1.33421	0.00077786	0.00359609	AC138969.1
AL451042.2	ENSG00000227959					72.564	140.955	121.431	95.1729					21.6686	53.0544	78.224	53.5657	51.6282	107.531	-1.06227	0.000811454	0.00372744	AL451042.2
AL449106.1	ENSG00000273062					28.0581	39.4198	21.7953	26.8967					7.8007	8.16222	9.38688	16.5424	10.473	29.0425	-1.45026	0.000829282	0.00380104	AL449106.1
PAGR1	ENSG00000280789					71.5965	28.6689	89.2571	67.2418					19.9351	21.4258	19.8167	45.6884	26.7165	64.191	-1.25643	0.000830781	0.00380563	PAGR1
MRTO4	ENSG00000053372					1029.44	754.948	1055.52	1182.42					339.764	269.353	244.059	742.831	399.002	1005.58	-1.33257	0.00084377	0.0038582	MRTO4
PTGS2	ENSG00000073756					2155.63	3063.99	2068.48	2110.36					495.778	797.857	1693.81	656.18	910.906	2349.62	-1.36738	0.00086152	0.00392912	PTGS2
TMC5	ENSG00000103534					22.253	25.0853	17.6438	26.8967					59.8054	52.0342	43.8054	36.2356	47.9702	22.9697	1.06298	0.000954494	0.00428992	TMC5
GZMB	ENSG00000100453					25.1555	19.1126	25.9468	33.1036					9.53419	11.2231	9.38688	8.66504	9.70229	25.8296	-1.42119	0.000956539	0.00429728	GZMB
AP002800.1	ENSG00000280032					15.4803	5.97269	13.4923	10.3449					34.6698	31.6286	22.9457	29.9338	29.7945	11.3226	1.38327	0.000957642	0.00430132	AP002800.1
EEF1A1P13	ENSG00000250182					57.0837	33.4471	57.083	50.6899					23.4021	23.4664	23.9887	27.5706	24.6069	49.5759	-1.01265	0.00104045	0.00463271	EEF1A1P13
C6orf99	ENSG00000203711					26.123	48.9761	24.9089	41.3795					10.4009	13.2636	17.7308	16.5424	14.4844	35.3469	-1.2831	0.00108391	0.00480587	C6orf99
CRISPLD2	ENSG00000103196					11.6102	10.7508	18.6817	10.3449					37.27	20.4055	56.3213	24.4197	34.6041	12.8469	1.42251	0.00112032	0.00495061	CRISPLD2
SPRY4	ENSG00000187678					77.4016	78.8395	65.386	86.897					22.5354	24.4867	45.8914	59.8676	38.1953	77.131	-1.00735	0.00116751	0.00513972	SPRY4
ANKHD1	ENSG00000131503					22.253	26.2798	19.7196	16.5518					42.4705	35.7097	55.2783	43.3252	44.1959	21.201	1.06309	0.00117189	0.00515469	ANKHD1
EID3	ENSG00000255150					28.0581	26.2798	22.8332	34.1381					6.93396	8.16222	8.34389	17.3301	10.1925	27.8273	-1.4299	0.00117643	0.00517036	EID3
DUSP4	ENSG00000120875					1180.37	1534.98	1916.95	1495.87					372.7	264.252	490.204	1074.47	550.405	1532.04	-1.4763	0.00122234	0.00534644	DUSP4
MIR193BHG	ENSG00000262454					47.4085	44.1979	44.6285	21.7243					11.2677	13.2636	13.5588	25.9951	16.0213	39.4898	-1.28714	0.00122448	0.00535467	MIR193BHG
UCN2	ENSG00000145040					27.0905	26.2798	34.2498	23.7932					7.8007	14.2839	9.38688	12.6037	11.0188	27.8534	-1.33963	0.00122518	0.00535629	UCN2
AL139385.1	ENSG00000275880					20.3179	41.8088	42.5528	30.0002					13.0012	14.2839	15.6448	13.3914	14.0803	33.6699	-1.2563	0.00128687	0.00559613	AL139385.1
MIR212	ENSG00000267195					24.188	65.6996	36.3255	18.6208					12.1344	15.3042	10.4299	15.7546	13.4058	36.2085	-1.42032	0.00129222	0.00561473	MIR212
AP003352.1	ENSG00000245970					46.4409	26.2798	29.0604	30.0002					13.0012	10.2028	12.5158	18.9055	13.6563	32.9453	-1.2621	0.00136778	0.00590405	AP003352.1
AC010186.2	ENSG00000256594					6.77264	15.529	7.26511	15.5173					32.9363	31.6286	27.1177	23.6319	28.8286	11.271	1.36632	0.00149719	0.006375	AC010186.2
LRRC29	ENSG00000125122					22.253	39.4198	30.0983	36.2071					13.8679	20.4055	7.30091	9.45277	12.7568	31.9945	-1.32817	0.00150573	0.0064036	LRRC29
CHMP4BP1	ENSG00000258469					20.3179	33.4471	36.3255	28.9657					6.93396	9.1825	19.8167	10.2405	11.5434	29.7641	-1.37914	0.001533	0.00649988	CHMP4BP1
TRMT6	ENSG00000089195					877.54	527.986	885.306	881.384					268.691	285.678	258.661	624.671	359.425	793.054	-1.14084	0.00158952	0.00671786	TRMT6
SLC11A1	ENSG00000018280					25.1555	37.0307	35.2877	36.2071					12.1344	22.4461	8.34389	13.3914	14.079	33.4202	-1.24811	0.00159357	0.00673228	SLC11A1
MATR3	ENSG00000015479					16.4478	3.58361	9.34086	12.4139					38.1368	27.5475	25.0317	23.6319	28.587	10.4465	1.43278	0.00161581	0.00680983	MATR3
SETMAR	ENSG00000170364					26.123	35.8361	47.7421	44.483					15.6014	4.08111	10.4299	26.7829	14.2238	38.5461	-1.41089	0.00163172	0.00686587	SETMAR
AL391069.2	ENSG00000232671					34.8307	62.116	24.9089	42.414					18.2016	13.2636	17.7308	22.8442	18.0101	41.0674	-1.17393	0.00173092	0.00722551	AL391069.2
PODXL2	ENSG00000114631					49.3435	88.3958	62.2724	62.0693					30.3361	20.4055	55.2783	18.1178	31.0344	65.5203	-1.08573	0.00180436	0.00748161	PODXL2
LINC00941	ENSG00000285517					33.8632	28.6689	32.1741	35.1726					11.2677	12.2433	9.38688	22.0565	13.7386	32.4697	-1.22349	0.00185015	0.00765637	LINC00941
RF00004	ENSG00000278048					41.6033	32.2525	28.0226	62.0693					9.53419	11.2231	29.2036	18.1178	17.0197	40.9869	-1.27807	0.00194227	0.00799045	RF00004
DOK3	ENSG00000146094					28.0581	13.1399	33.2119	26.8967					8.66745	9.1825	7.30091	12.6037	9.43864	25.3267	-1.4188	0.00201062	0.0082234	DOK3
EXOSC4	ENSG00000178896					364.755	403.754	558.376	594.831					114.41	98.9669	115.772	357.63	171.695	480.429	-1.48256	0.00206888	0.00843056	EXOSC4
PIH1D2	ENSG00000150773					29.0256	23.8908	22.8332	35.1726					10.4009	10.2028	13.5588	12.6037	11.6916	27.7305	-1.24864	0.00208057	0.00847162	PIH1D2
AC080023.1	ENSG00000254554					47.4085	52.5597	50.8558	24.8277					6.93396	13.2636	28.1606	24.4197	18.1945	43.9129	-1.27251	0.00214913	0.00871537	AC080023.1
AL596244.1	ENSG00000261534					27.0905	31.058	42.5528	28.9657					15.6014	14.2839	17.7308	11.0282	14.6611	32.4168	-1.15291	0.00228649	0.00919621	AL596244.1
SESN1	ENSG00000080546					20.3179	5.97269	12.4545	21.7243					32.0696	38.7705	35.4615	34.6602	35.2405	15.1173	1.20358	0.00234046	0.0093885	SESN1
CAMK1G	ENSG00000008118					44.5059	50.1706	53.9694	45.5175					12.1344	17.3447	39.6335	23.6319	23.1861	48.5408	-1.07522	0.00239472	0.0095839	CAMK1G
SLC52A1	ENSG00000132517					8.70768	5.97269	10.3787	17.5863					26.8691	28.5678	30.2466	22.0565	26.935	10.6614	1.32471	0.00255089	0.0101395	SLC52A1
MYL7	ENSG00000106631					25.1555	38.2252	31.1362	48.621					17.3349	18.365	17.7308	13.3914	16.7055	35.7845	-1.10285	0.00267784	0.0105861	MYL7
ULBP3	ENSG00000131019					37.7333	15.529	42.5528	22.7587					8.66745	11.2231	16.6878	11.0282	11.9016	29.6434	-1.33285	0.00269528	0.0106431	ULBP3
AC055811.4	ENSG00000278864					40.6358	35.8361	33.2119	24.8277					7.8007	9.1825	15.6448	23.6319	14.065	33.6279	-1.24528	0.00282031	0.0110568	AC055811.4
C11orf91	ENSG00000205177					23.2205	54.9488	39.4392	31.0347					7.8007	5.10139	21.9027	22.0565	14.2153	37.1608	-1.37532	0.00282739	0.0110754	C11orf91
AGAP1-IT1	ENSG00000235529					28.0581	25.0853	17.6438	20.6898					6.06721	7.14194	6.25792	14.1792	8.41156	22.8692	-1.42195	0.00293063	0.0114393	AGAP1-IT1
AL354920.1	ENSG00000254473					25.1555	57.3378	44.6285	38.2761					19.0684	22.4461	22.9457	14.9669	19.8568	41.3495	-1.06067	0.00303398	0.0117815	AL354920.1
IGFL1P1	ENSG00000268879					72.564	77.645	106.901	46.552					17.3349	28.5678	22.9457	68.5326	34.3452	75.9155	-1.13231	0.00305065	0.0118316	IGFL1P1
AL117332.1	ENSG00000275457					42.5709	51.3651	36.3255	45.5175					7.8007	8.16222	21.9027	34.6602	18.1315	43.9448	-1.26283	0.00306233	0.0118741	AL117332.1
BX255925.1	ENSG00000260996					49.3435	50.1706	68.4996	41.3795					13.8679	15.3042	42.7625	28.3583	25.0732	52.3483	-1.06763	0.00338256	0.0129065	BX255925.1
SH2B3	ENSG00000111252					24.188	8.36177	38.4013	24.8277					52.8714	36.73	51.1063	63.0185	50.9316	23.9447	1.08222	0.00339282	0.0129386	SH2B3
RPL7P19	ENSG00000241458					28.0581	20.3071	36.3255	16.5518					4.33372	6.12166	14.6018	12.6037	9.41523	25.3106	-1.43117	0.00349584	0.013245	RPL7P19
AC135983.2	ENSG00000223509					25.1555	14.3345	17.6438	19.6553					29.4693	38.7705	44.8484	41.7498	38.7095	19.1973	1.00116	0.00388941	0.0145203	AC135983.2
SPNS2	ENSG00000183018					33.8632	29.8635	33.2119	32.0691					15.6014	10.2028	18.7738	17.3301	15.477	32.2519	-1.05658	0.0039359	0.014659	SPNS2
ZNF8	ENSG00000278129					39.6683	16.7235	46.7043	35.1726					12.1344	6.12166	6.25792	26.7829	12.8242	34.5672	-1.40656	0.00395683	0.0147213	ZNF8
AP001273.1	ENSG00000279696					35.7982	45.3924	44.6285	26.8967					13.8679	8.16222	29.2036	18.1178	17.3379	38.179	-1.14084	0.00401609	0.0149075	AP001273.1
BTBD19	ENSG00000222009					70.6289	50.1706	91.3328	34.1381					13.0012	16.3244	38.5905	43.3252	27.8103	61.5676	-1.14473	0.0040976	0.0151673	BTBD19
PLCB2	ENSG00000137841					32.8957	21.5017	31.1362	23.7932					9.53419	10.2028	6.25792	18.9055	11.2251	27.3317	-1.26513	0.00411875	0.0152402	PLCB2
MAT2A	ENSG00000168906					1284.87	1341.47	1922.14	1479.32					298.16	246.907	868.808	894.075	576.988	1506.95	-1.38491	0.00423613	0.0156251	MAT2A
PDE5A	ENSG00000138735					20.3179	16.7235	22.8332	15.5173					28.6026	59.1761	32.3326	36.2356	39.0867	18.848	1.04492	0.00437087	0.0160601	PDE5A
CTSW	ENSG00000172543					26.123	28.6689	42.5528	28.9657					3.46698	16.3244	9.38688	21.2687	12.6118	31.5776	-1.31699	0.00452197	0.0165152	CTSW
Z95331.1	ENSG00000280383					4.8376	8.36177	6.22724	8.27591					21.6686	14.2839	19.8167	18.9055	18.6687	6.92563	1.44234	0.00453597	0.0165511	Z95331.1
CHAC2	ENSG00000143942					66.7589	37.0307	63.3102	40.3451					13.0012	21.4258	18.7738	44.1129	24.3284	51.8612	-1.08302	0.00457927	0.0166831	CHAC2
PRC1	ENSG00000198901					28.0581	15.529	14.5302	8.27591					33.803	41.8314	37.5475	30.7215	35.9759	16.5983	1.10498	0.00488023	0.0176391	PRC1
ZFP42	ENSG00000179059					23.2205	19.1126	23.8711	26.8967					4.33372	7.14194	11.4729	14.1792	9.28192	23.2752	-1.32217	0.00494208	0.0178412	ZFP42
RPL13AP7	ENSG00000213885					21.2854	25.0853	21.7953	17.5863					4.33372	8.16222	11.4729	10.2405	8.55233	21.4381	-1.32931	0.00501939	0.018083	RPL13AP7
AC027796.4	ENSG00000262903					47.4085	16.7235	52.9315	27.9312					14.7347	7.14194	10.4299	25.9951	14.5754	36.2487	-1.29892	0.00504319	0.0181584	AC027796.4
AC010864.1	ENSG00000273008					22.253	35.8361	24.9089	28.9657					16.4682	12.2433	10.4299	11.816	12.7393	27.9909	-1.12524	0.00505252	0.0181775	AC010864.1
LINC01002	ENSG00000282508					23.2205	11.9454	20.7575	25.8622					45.9375	19.3853	50.0634	58.2921	43.4196	20.4464	1.08391	0.00532813	0.0190583	LINC01002
AC135050.6	ENSG00000278133					17.4154	15.529	32.1741	22.7587					6.93396	9.1825	7.30091	11.816	8.80833	21.9693	-1.31245	0.00580405	0.0205199	AC135050.6
MB21D2	ENSG00000180611					30.9606	9.5563	53.9694	31.0347					41.6037	62.2369	66.7512	90.5891	65.2952	31.3802	1.05056	0.0059138	0.0208449	MB21D2
PSAPL1	ENSG00000178597					24.188	33.4471	53.9694	15.5173					13.0012	15.3042	9.38688	16.5424	13.5586	31.7804	-1.22045	0.00592468	0.0208728	PSAPL1
ZNF750	ENSG00000141579					33.8632	32.2525	29.0604	15.5173					6.93396	9.1825	11.4729	18.9055	11.6237	27.6734	-1.2382	0.00605937	0.0212974	ZNF750
AC107959.3	ENSG00000253616					29.0256	32.2525	33.2119	32.0691					13.0012	20.4055	19.8167	7.08958	15.0783	31.6398	-1.09098	0.00617266	0.0216418	AC107959.3
AC005829.2	ENSG00000262539					39.6683	48.9761	39.4392	20.6898					25.1356	11.2231	21.9027	11.0282	17.3224	37.1933	-1.10219	0.00630313	0.0220254	AC005829.2
SIRPB2	ENSG00000196209					34.8307	28.6689	30.0983	25.8622					9.53419	7.14194	25.0317	11.816	13.3809	29.865	-1.17218	0.00633574	0.0221209	SIRPB2
LINC00346	ENSG00000255874					24.188	28.6689	10.3787	26.8967					5.20047	10.2028	12.5158	7.87731	8.9491	22.5331	-1.34497	0.00658476	0.0228426	LINC00346
RNVU1-6	ENSG00000201558					31.9281	59.7269	12.4545	19.6553					11.2677	14.2839	13.5588	11.0282	12.5347	30.9412	-1.30077	0.00671961	0.0232261	RNVU1-6
SUCLA2-AS1	ENSG00000227848					7.74016	5.97269	3.11362	9.3104					19.0684	19.3853	13.5588	18.9055	17.7295	6.53422	1.43838	0.00675147	0.0233248	SUCLA2-AS1
PBDC1	ENSG00000102390					299.931	151.706	296.832	321.726					91.0082	77.5411	68.8371	218.202	113.897	267.549	-1.2296	0.00702288	0.024112	PBDC1
S1PR5	ENSG00000180739					94.8169	17.9181	118.318	108.621					258.29	213.238	213.812	202.447	221.947	84.9184	1.38392	0.00703837	0.0241481	S1PR5
MASP2	ENSG00000009724					25.1555	35.8361	32.1741	17.5863					7.8007	5.10139	18.7738	14.9669	11.6607	27.688	-1.24329	0.00711379	0.0243368	MASP2
ZNF181	ENSG00000197841					22.253	41.8088	29.0604	33.1036					12.1344	22.4461	15.6448	10.2405	15.1165	31.5565	-1.07148	0.00731054	0.0248804	ZNF181
FLI1	ENSG00000151702					10.6427	10.7508	9.34086	10.3449					24.2689	29.588	27.1177	14.1792	23.7884	10.2698	1.20353	0.00737255	0.0250403	FLI1
ACSM3	ENSG00000005187					9.6752	11.9454	4.15149	8.27591					18.2016	33.6692	18.7738	15.7546	21.5998	8.51199	1.34395	0.00742138	0.0251722	ACSM3
AC139100.2	ENSG00000278000					23.2205	34.6416	26.9847	25.8622					10.4009	13.2636	17.7308	11.816	13.3028	27.6772	-1.06299	0.00757519	0.0256319	AC139100.2
AP005432.2	ENSG00000273335					23.2205	23.8908	20.7575	21.7243					10.4009	14.2839	9.38688	2.36319	9.10872	22.3982	-1.32124	0.00772953	0.0260912	AP005432.2
MMP24	ENSG00000125966					29.0256	44.1979	64.3481	34.1381					7.8007	16.3244	31.2896	25.2074	20.1555	42.9274	-1.09391	0.00789762	0.0265648	MMP24
AP003469.4	ENSG00000261087					41.6033	34.6416	41.5149	35.1726					16.4682	12.2433	8.34389	34.6602	17.9289	38.2331	-1.06893	0.00904165	0.0298032	AP003469.4
AL136131.2	ENSG00000236961					24.188	28.6689	14.5302	14.4828					3.46698	10.2028	10.4299	8.66504	8.19117	20.4675	-1.32979	0.00913367	0.0300782	AL136131.2
RPL24P2	ENSG00000235065					22.253	22.6962	16.606	26.8967					6.93396	9.1825	8.34389	14.1792	9.65988	22.113	-1.18282	0.00963542	0.0314354	RPL24P2
MIR17HG	ENSG00000215417					31.9281	32.2525	36.3255	24.8277					2.60023	12.2433	12.5158	25.2074	13.1417	31.3335	-1.24247	0.00965868	0.0314966	MIR17HG
RFXAP	ENSG00000133111					24.188	2.38908	16.606	13.4484					28.6026	28.5678	41.7195	30.7215	32.4028	14.1578	1.17228	0.0099842	0.0324224	RFXAP
AC119427.1	ENSG00000282221					16.4478	13.1399	23.8711	30.0002					7.8007	9.1825	8.34389	10.2405	8.8919	20.8647	-1.23122	0.0100358	0.0325598	AC119427.1
AL022315.1	ENSG00000225867					13.5453	11.9454	18.6817	23.7932					2.60023	5.10139	10.4299	7.08958	6.30527	16.9914	-1.44495	0.0100764	0.0326462	AL022315.1
AC016727.1	ENSG00000270820					14.5128	16.7235	14.5302	12.4139					7.8007	3.06083	3.12896	6.30185	5.07309	14.5451	-1.4905	0.0101438	0.0328344	AC016727.1
GAS2L2	ENSG00000270765					33.8632	43.0034	22.8332	24.8277					10.4009	16.3244	12.5158	21.2687	15.1275	31.1319	-1.0295	0.0102596	0.0331403	GAS2L2
FUT3	ENSG00000171124					7.74016	7.16723	11.4166	7.24142					19.0684	17.3447	16.6878	25.2074	19.5771	8.39135	1.22633	0.010881	0.0348453	FUT3
RTP4	ENSG00000136514					3.87008	5.97269	16.606	15.5173					27.7358	33.6692	18.7738	19.6933	24.968	10.4915	1.24632	0.0118124	0.0373283	RTP4
KLHL23	ENSG00000213160					31.9281	10.7508	10.3787	26.8967					2.60023	14.2839	6.25792	6.30185	7.36097	19.9886	-1.46541	0.0130642	0.0406131	KLHL23
AC083880.1	ENSG00000273391					13.5453	32.2525	13.4923	19.6553					6.93396	8.16222	6.25792	11.0282	8.09558	19.7364	-1.26474	0.0130894	0.0406735	AC083880.1
PPFIA4	ENSG00000143847					19.3504	20.3071	12.4545	12.4139					4.33372	5.10139	7.30091	8.66504	6.35027	16.1315	-1.33632	0.0135546	0.0419579	PPFIA4
GPATCH4	ENSG00000160818					738.217	318.942	746.231	787.246					237.488	217.319	192.953	545.11	298.217	647.659	-1.11809	0.0135748	0.042002	GPATCH4
AC008687.4	ENSG00000268655					7.74016	2.38908	10.3787	11.3794					29.4693	13.2636	26.0747	12.6037	20.3528	7.97183	1.33596	0.0138154	0.0426458	AC008687.4
AL139274.2	ENSG00000272008					4.8376	15.529	5.18936	7.24142					19.0684	25.5069	17.7308	15.7546	19.5152	8.19934	1.27175	0.0139572	0.0430267	AL139274.2
TEX22	ENSG00000226174					16.4478	20.3071	19.7196	7.24142					5.20047	3.06083	4.17195	10.2405	5.66844	15.929	-1.45797	0.014255	0.043791	TEX22
AL139393.2	ENSG00000272841					32.8957	39.4198	41.5149	37.2416					16.4682	5.10139	19.8167	32.297	18.4208	37.768	-1.01758	0.014755	0.0450966	AL139393.2
AL136040.1	ENSG00000273783					16.4478	15.529	21.7953	18.6208					3.46698	5.10139	9.38688	11.816	7.4428	18.0982	-1.27457	0.0149501	0.0455936	AL136040.1
FGF17	ENSG00000158815					9.6752	9.5563	8.30298	7.24142					13.0012	24.4867	11.4729	33.0847	20.5113	8.69398	1.24723	0.0154223	0.0467328	FGF17
AL157392.3	ENSG00000239665					36.7657	22.6962	46.7043	26.8967					6.93396	17.3447	6.25792	29.1461	14.9207	33.2657	-1.1437	0.0159386	0.0480786	AL157392.3
PGAM1P8	ENSG00000255200					11.6102	13.1399	13.4923	14.4828					3.46698	4.08111	2.08597	8.66504	4.57478	13.1813	-1.49263	0.0159633	0.0481133	PGAM1P8
PKD1P1	ENSG00000183889					16.4478	64.5051	22.8332	18.6208					16.4682	12.2433	12.5158	13.3914	13.6547	30.6017	-1.14894	0.016011	0.048207	PKD1P1
PPP1R27	ENSG00000182676					27.0905	23.8908	25.9468	26.8967					11.2677	20.4055	13.5588	6.30185	12.8835	25.9562	-1.03281	0.0160964	0.048395	PPP1R27
AL356356.1	ENSG00000237781					19.3504	27.4744	11.4166	9.3104					6.06721	4.08111	5.21493	10.2405	6.40094	16.8879	-1.37134	0.016556	0.0495856	AL356356.1
