# Supplementary material for: Ferulic acid in synergy with retinol alleviates oxidative injury of HaCaT cells during UVB-induced photoaging
Source: Aging (Albany NY). 2024 Apr 18;16(8):7153–73. doi: 10.18632/aging.205749 (PMC11087097; doi:10.18632/aging.205749)
Supplement: Supplementary Table 9 [file aging-16-205749-s009.xlsx]

## Sheet: VA-FA vs M
Category	GOID	Description	GeneRatio	BgRatio	pvalue	padj	geneID	geneName	Count	Up	Up_Gene_names	Down	Down_Gene_names
BP	GO:0070268	cornification	47/2247	105/14943	2.92193e-13	1.37953e-09	ENSG00000169469/ENSG00000163216/ENSG00000186832/ENSG00000241794/ENSG00000124102/ENSG00000167768/ENSG00000186081/ENSG00000163207/ENSG00000185479/ENSG00000205420/ENSG00000169474/ENSG00000096696/ENSG00000186847/ENSG00000203785/ENSG00000171403/ENSG00000128422/ENSG00000170465/ENSG00000143631/ENSG00000244094/ENSG00000170477/ENSG00000081277/ENSG00000052344/ENSG00000112378/ENSG00000167767/ENSG00000092295…	SPRR1B/SPRR2D/KRT16/SPRR2A/PI3/KRT1/KRT5/IVL/KRT6B/KRT6A/SPRR1A/DSP/KRT14/SPRR2E/KRT9/KRT17/KRT6C/FLG/SPRR2F/KRT4/PKP1/PRSS8/PERP/KRT80/TGM1/DSC2/PKP2/DSC3/KRT3/KLK13/RPTN/LCE3D/CASP14/KRT77/SPINK6/DSG1/DSG4/PCSK6/KRT76/KRT23/KRT36/SPRR3/KLK14/SPRR2B/KRT20/DSC1/LIPM	47	5	ENSG00000052344/ENSG00000167767/ENSG00000057294/ENSG00000167759/ENSG00000173239	42	ENSG00000169469/ENSG00000163216/ENSG00000186832/ENSG00000241794/ENSG00000124102/ENSG00000167768/ENSG00000186081/ENSG00000163207/ENSG00000185479/ENSG00000205420/ENSG00000169474/ENSG00000096696/ENSG00000186847/ENSG00000203785/ENSG00000171403/ENSG00000128422/ENSG00000170465/ENSG00000143631/ENSG00000244094/ENSG00000170477/ENSG00000081277/ENSG00000112378/ENSG00000092295/ENSG00000134755/ENSG00000134762…
BP	GO:0043588	skin development	100/2247	327/14943	4.86693e-13	1.37953e-09	ENSG00000169469/ENSG00000163216/ENSG00000186832/ENSG00000241794/ENSG00000124102/ENSG00000134363/ENSG00000167768/ENSG00000203783/ENSG00000122641/ENSG00000186081/ENSG00000163207/ENSG00000185479/ENSG00000205420/ENSG00000169474/ENSG00000096696/ENSG00000186847/ENSG00000175793/ENSG00000135960/ENSG00000203785/ENSG00000107984/ENSG00000136943/ENSG00000171403/ENSG00000128422/ENSG00000170465/ENSG00000143631…	SPRR1B/SPRR2D/KRT16/SPRR2A/PI3/FST/KRT1/PRR9/INHBA/KRT5/IVL/KRT6B/KRT6A/SPRR1A/DSP/KRT14/SFN/EDAR/SPRR2E/DKK1/CTSV/KRT9/KRT17/KRT6C/FLG/SPRR2F/KRT4/PKP1/ITGA6/HOXC13/TXNIP/AKR1C3/PRSS8/PERP/FOXN1/SRSF6/SPRR4/KRT80/MYO5A/TGM1/OVOL2/DSC2/SCEL/GJB3/PKP2/DSC3/LCE3E/ZFP36/FERMT1/PRKCH/KRT3/KLK13/CELSR1/PKD1/RPTN/OVOL1/NSUN2/LCE3D/ALOX15B/CASP14/KRT77/SPINK6/EDA/COL5A3/LGR4/FRAS1/DSG1/FOXE1/KRTAP13-2/L…	100	21	ENSG00000135960/ENSG00000123364/ENSG00000265972/ENSG00000052344/ENSG00000167767/ENSG00000125850/ENSG00000136155/ENSG00000057294/ENSG00000128016/ENSG00000027075/ENSG00000167759/ENSG00000158813/ENSG00000205213/ENSG00000107882/ENSG00000002745/ENSG00000092969/ENSG00000106689/ENSG00000132932/ENSG00000158055/ENSG00000173239/ENSG00000164692	79	ENSG00000169469/ENSG00000163216/ENSG00000186832/ENSG00000241794/ENSG00000124102/ENSG00000134363/ENSG00000167768/ENSG00000203783/ENSG00000122641/ENSG00000186081/ENSG00000163207/ENSG00000185479/ENSG00000205420/ENSG00000169474/ENSG00000096696/ENSG00000186847/ENSG00000175793/ENSG00000203785/ENSG00000107984/ENSG00000136943/ENSG00000171403/ENSG00000128422/ENSG00000170465/ENSG00000143631/ENSG00000244094…
BP	GO:0031424	keratinization	57/2247	151/14943	5.60851e-12	8.88014e-09	ENSG00000169469/ENSG00000163216/ENSG00000186832/ENSG00000241794/ENSG00000124102/ENSG00000167768/ENSG00000186081/ENSG00000163207/ENSG00000185479/ENSG00000205420/ENSG00000169474/ENSG00000096696/ENSG00000186847/ENSG00000175793/ENSG00000203785/ENSG00000171403/ENSG00000128422/ENSG00000170465/ENSG00000143631/ENSG00000244094/ENSG00000170477/ENSG00000081277/ENSG00000052344/ENSG00000112378/ENSG00000184148…	SPRR1B/SPRR2D/KRT16/SPRR2A/PI3/KRT1/KRT5/IVL/KRT6B/KRT6A/SPRR1A/DSP/KRT14/SFN/SPRR2E/KRT9/KRT17/KRT6C/FLG/SPRR2F/KRT4/PKP1/PRSS8/PERP/SPRR4/KRT80/TGM1/DSC2/PKP2/DSC3/LCE3E/KRT3/KLK13/RPTN/LCE3D/CASP14/KRT77/SPINK6/DSG1/KRTAP13-2/LCE1F/DSG4/PCSK6/KRT76/LCE1C/HRNR/KRT23/LCE3A/ABCA12/KRT36/SPRR3/KRTAP19-5/KLK14/SPRR2B/KRT20/DSC1/LIPM	57	5	ENSG00000052344/ENSG00000167767/ENSG00000057294/ENSG00000167759/ENSG00000173239	52	ENSG00000169469/ENSG00000163216/ENSG00000186832/ENSG00000241794/ENSG00000124102/ENSG00000167768/ENSG00000186081/ENSG00000163207/ENSG00000185479/ENSG00000205420/ENSG00000169474/ENSG00000096696/ENSG00000186847/ENSG00000175793/ENSG00000203785/ENSG00000171403/ENSG00000128422/ENSG00000170465/ENSG00000143631/ENSG00000244094/ENSG00000170477/ENSG00000081277/ENSG00000112378/ENSG00000184148/ENSG00000092295…
BP	GO:0008544	epidermis development	106/2247	368/14943	6.26576e-12	8.88014e-09	ENSG00000169469/ENSG00000087494/ENSG00000163216/ENSG00000186832/ENSG00000241794/ENSG00000124102/ENSG00000163435/ENSG00000134363/ENSG00000167768/ENSG00000203783/ENSG00000122641/ENSG00000186081/ENSG00000163207/ENSG00000185479/ENSG00000205420/ENSG00000169474/ENSG00000096696/ENSG00000186847/ENSG00000175793/ENSG00000135960/ENSG00000203785/ENSG00000107984/ENSG00000114270/ENSG00000136943/ENSG00000171403…	SPRR1B/PTHLH/SPRR2D/KRT16/SPRR2A/PI3/ELF3/FST/KRT1/PRR9/INHBA/KRT5/IVL/KRT6B/KRT6A/SPRR1A/DSP/KRT14/SFN/EDAR/SPRR2E/DKK1/COL7A1/CTSV/KRT9/KRT17/KRT6C/FLG/EMP1/SPRR2F/KRT4/PKP1/HOXC13/UGCG/TXNIP/AKR1C3/PRSS8/PERP/FOXN1/SRSF6/SPRR4/GJB5/KRT80/MYO5A/TGM1/OVOL2/DSC2/SCEL/PKP2/DSC3/MAFF/LCE3E/ZFP36/FERMT1/PRKCH/KRT3/KLK13/CELSR1/RPTN/OVOL1/NSUN2/LCE3D/ALOX15B/CALML5/CASP14/KRT77/SPINK6/SEC24B/KLF4/EDA…	106	26	ENSG00000163435/ENSG00000135960/ENSG00000134531/ENSG00000123364/ENSG00000148154/ENSG00000265972/ENSG00000052344/ENSG00000167767/ENSG00000125850/ENSG00000136155/ENSG00000057294/ENSG00000185022/ENSG00000128016/ENSG00000027075/ENSG00000167759/ENSG00000138802/ENSG00000158813/ENSG00000205213/ENSG00000114315/ENSG00000135547/ENSG00000002745/ENSG00000092969/ENSG00000106689/ENSG00000182568/ENSG00000158055…	80	ENSG00000169469/ENSG00000087494/ENSG00000163216/ENSG00000186832/ENSG00000241794/ENSG00000124102/ENSG00000134363/ENSG00000167768/ENSG00000203783/ENSG00000122641/ENSG00000186081/ENSG00000163207/ENSG00000185479/ENSG00000205420/ENSG00000169474/ENSG00000096696/ENSG00000186847/ENSG00000175793/ENSG00000203785/ENSG00000107984/ENSG00000114270/ENSG00000136943/ENSG00000171403/ENSG00000128422/ENSG00000170465…
BP	GO:0030216	keratinocyte differentiation	71/2247	224/14943	2.03363e-10	2.30572e-07	ENSG00000169469/ENSG00000163216/ENSG00000186832/ENSG00000241794/ENSG00000124102/ENSG00000167768/ENSG00000203783/ENSG00000186081/ENSG00000163207/ENSG00000185479/ENSG00000205420/ENSG00000169474/ENSG00000096696/ENSG00000186847/ENSG00000175793/ENSG00000203785/ENSG00000136943/ENSG00000171403/ENSG00000128422/ENSG00000170465/ENSG00000143631/ENSG00000244094/ENSG00000170477/ENSG00000081277/ENSG00000265972…	SPRR1B/SPRR2D/KRT16/SPRR2A/PI3/KRT1/PRR9/KRT5/IVL/KRT6B/KRT6A/SPRR1A/DSP/KRT14/SFN/SPRR2E/CTSV/KRT9/KRT17/KRT6C/FLG/SPRR2F/KRT4/PKP1/TXNIP/AKR1C3/PRSS8/PERP/FOXN1/SRSF6/SPRR4/KRT80/TGM1/OVOL2/DSC2/SCEL/PKP2/DSC3/LCE3E/ZFP36/PRKCH/KRT3/KLK13/RPTN/LCE3D/ALOX15B/CASP14/KRT77/SPINK6/DSG1/KRTAP13-2/LCE1F/DSG4/PCSK6/KRT76/LCE1C/HRNR/KRT23/WNT16/LCE3A/ABCA12/KRT36/LELP1/SPRR3/KRTAP19-5/KLK14/SPRR2B/KRT2…	71	11	ENSG00000265972/ENSG00000052344/ENSG00000167767/ENSG00000125850/ENSG00000136155/ENSG00000057294/ENSG00000128016/ENSG00000027075/ENSG00000167759/ENSG00000002745/ENSG00000173239	60	ENSG00000169469/ENSG00000163216/ENSG00000186832/ENSG00000241794/ENSG00000124102/ENSG00000167768/ENSG00000203783/ENSG00000186081/ENSG00000163207/ENSG00000185479/ENSG00000205420/ENSG00000169474/ENSG00000096696/ENSG00000186847/ENSG00000175793/ENSG00000203785/ENSG00000136943/ENSG00000171403/ENSG00000128422/ENSG00000170465/ENSG00000143631/ENSG00000244094/ENSG00000170477/ENSG00000081277/ENSG00000196139…
BP	GO:0009913	epidermal cell differentiation	79/2247	270/14943	1.40503e-09	1.32752e-06	ENSG00000169469/ENSG00000163216/ENSG00000186832/ENSG00000241794/ENSG00000124102/ENSG00000167768/ENSG00000203783/ENSG00000186081/ENSG00000163207/ENSG00000185479/ENSG00000205420/ENSG00000169474/ENSG00000096696/ENSG00000186847/ENSG00000175793/ENSG00000203785/ENSG00000136943/ENSG00000171403/ENSG00000128422/ENSG00000170465/ENSG00000143631/ENSG00000244094/ENSG00000170477/ENSG00000081277/ENSG00000265972…	SPRR1B/SPRR2D/KRT16/SPRR2A/PI3/KRT1/PRR9/KRT5/IVL/KRT6B/KRT6A/SPRR1A/DSP/KRT14/SFN/SPRR2E/CTSV/KRT9/KRT17/KRT6C/FLG/SPRR2F/KRT4/PKP1/TXNIP/AKR1C3/PRSS8/PERP/FOXN1/SRSF6/SPRR4/KRT80/TGM1/OVOL2/DSC2/SCEL/PKP2/DSC3/MAFF/LCE3E/ZFP36/PRKCH/KRT3/KLK13/RPTN/LCE3D/ALOX15B/CASP14/KRT77/SPINK6/SEC24B/KLF4/HES1/HEY2/DSG1/KRTAP13-2/LCE1F/DSG4/SULT2B1/PCSK6/KRT76/LCE1C/HRNR/KRT23/GLI1/WNT16/PTCH2/LCE3A/ABCA12…	79	15	ENSG00000265972/ENSG00000052344/ENSG00000167767/ENSG00000125850/ENSG00000136155/ENSG00000057294/ENSG00000185022/ENSG00000128016/ENSG00000027075/ENSG00000167759/ENSG00000138802/ENSG00000114315/ENSG00000135547/ENSG00000002745/ENSG00000173239	64	ENSG00000169469/ENSG00000163216/ENSG00000186832/ENSG00000241794/ENSG00000124102/ENSG00000167768/ENSG00000203783/ENSG00000186081/ENSG00000163207/ENSG00000185479/ENSG00000205420/ENSG00000169474/ENSG00000096696/ENSG00000186847/ENSG00000175793/ENSG00000203785/ENSG00000136943/ENSG00000171403/ENSG00000128422/ENSG00000170465/ENSG00000143631/ENSG00000244094/ENSG00000170477/ENSG00000081277/ENSG00000196139…
BP	GO:0018149	peptide cross-linking	25/2247	48/14943	2.13901e-09	1.73229e-06	ENSG00000169469/ENSG00000163216/ENSG00000241794/ENSG00000124102/ENSG00000167768/ENSG00000203783/ENSG00000163207/ENSG00000169474/ENSG00000137801/ENSG00000096696/ENSG00000203785/ENSG00000143631/ENSG00000244094/ENSG00000184148/ENSG00000092295/ENSG00000185966/ENSG00000163202/ENSG00000198959/ENSG00000240386/ENSG00000197084/ENSG00000182492/ENSG00000185962/ENSG00000203784/ENSG00000163209/ENSG00000196805	SPRR1B/SPRR2D/SPRR2A/PI3/KRT1/PRR9/IVL/SPRR1A/THBS1/DSP/SPRR2E/FLG/SPRR2F/SPRR4/TGM1/LCE3E/LCE3D/TGM2/LCE1F/LCE1C/BGN/LCE3A/LELP1/SPRR3/SPRR2B	25	0		25	ENSG00000169469/ENSG00000163216/ENSG00000241794/ENSG00000124102/ENSG00000167768/ENSG00000203783/ENSG00000163207/ENSG00000169474/ENSG00000137801/ENSG00000096696/ENSG00000203785/ENSG00000143631/ENSG00000244094/ENSG00000184148/ENSG00000092295/ENSG00000185966/ENSG00000163202/ENSG00000198959/ENSG00000240386/ENSG00000197084/ENSG00000182492/ENSG00000185962/ENSG00000203784/ENSG00000163209/ENSG00000196805
BP	GO:0045103	intermediate filament-based process	20/2247	42/14943	5.80682e-07	0.000411486	ENSG00000186832/ENSG00000205420/ENSG00000096696/ENSG00000186847/ENSG00000114796/ENSG00000151914/ENSG00000171403/ENSG00000128422/ENSG00000170465/ENSG00000081277/ENSG00000173744/ENSG00000057294/ENSG00000180921/ENSG00000186442/ENSG00000261150/ENSG00000112851/ENSG00000182253/ENSG00000132932/ENSG00000171431/ENSG00000162520	KRT16/KRT6A/DSP/KRT14/KLHL24/DST/KRT9/KRT17/KRT6C/PKP1/AGFG1/PKP2/FAM83H/KRT3/EPPK1/ERBIN/SYNM/ATP8A2/KRT20/SYNC	20	5	ENSG00000114796/ENSG00000173744/ENSG00000057294/ENSG00000112851/ENSG00000132932	15	ENSG00000186832/ENSG00000205420/ENSG00000096696/ENSG00000186847/ENSG00000151914/ENSG00000171403/ENSG00000128422/ENSG00000170465/ENSG00000081277/ENSG00000180921/ENSG00000186442/ENSG00000261150/ENSG00000182253/ENSG00000171431/ENSG00000162520
BP	GO:0016126	sterol biosynthetic process	28/2247	74/14943	1.28279e-06	0.000808013	ENSG00000052802/ENSG00000112972/ENSG00000079459/ENSG00000186480/ENSG00000072310/ENSG00000172893/ENSG00000133935/ENSG00000067064/ENSG00000110921/ENSG00000109929/ENSG00000169710/ENSG00000113161/ENSG00000132196/ENSG00000159348/ENSG00000167508/ENSG00000131473/ENSG00000160752/ENSG00000001630/ENSG00000185591/ENSG00000104549/ENSG00000143815/ENSG00000138135/ENSG00000125629/ENSG00000119927/ENSG00000166394…	MSMO1/HMGCS1/FDFT1/INSIG1/SREBF1/DHCR7/ERG28/IDI1/MVK/SC5D/FASN/HMGCR/HSD17B7/CYB5R1/MVD/ACLY/FDPS/CYP51A1/SP1/SQLE/LBR/CH25H/INSIG2/GPAM/CYB5R2/APOE/CES1/FAXDC2	28	23	ENSG00000052802/ENSG00000112972/ENSG00000079459/ENSG00000186480/ENSG00000072310/ENSG00000172893/ENSG00000133935/ENSG00000067064/ENSG00000110921/ENSG00000109929/ENSG00000169710/ENSG00000113161/ENSG00000132196/ENSG00000167508/ENSG00000131473/ENSG00000160752/ENSG00000001630/ENSG00000185591/ENSG00000104549/ENSG00000143815/ENSG00000138135/ENSG00000125629/ENSG00000170271	5	ENSG00000159348/ENSG00000119927/ENSG00000166394/ENSG00000130203/ENSG00000198848
BP	GO:0045104	intermediate filament cytoskeleton organization	19/2247	41/14943	1.86959e-06	0.00105987	ENSG00000186832/ENSG00000205420/ENSG00000096696/ENSG00000186847/ENSG00000114796/ENSG00000151914/ENSG00000171403/ENSG00000128422/ENSG00000170465/ENSG00000081277/ENSG00000173744/ENSG00000057294/ENSG00000180921/ENSG00000186442/ENSG00000261150/ENSG00000112851/ENSG00000182253/ENSG00000132932/ENSG00000171431	KRT16/KRT6A/DSP/KRT14/KLHL24/DST/KRT9/KRT17/KRT6C/PKP1/AGFG1/PKP2/FAM83H/KRT3/EPPK1/ERBIN/SYNM/ATP8A2/KRT20	19	5	ENSG00000114796/ENSG00000173744/ENSG00000057294/ENSG00000112851/ENSG00000132932	14	ENSG00000186832/ENSG00000205420/ENSG00000096696/ENSG00000186847/ENSG00000151914/ENSG00000171403/ENSG00000128422/ENSG00000170465/ENSG00000081277/ENSG00000180921/ENSG00000186442/ENSG00000261150/ENSG00000182253/ENSG00000171431
BP	GO:0008202	steroid metabolic process	70/2247	276/14943	4.48255e-06	0.00231014	ENSG00000052802/ENSG00000112972/ENSG00000079459/ENSG00000186480/ENSG00000072310/ENSG00000172893/ENSG00000187134/ENSG00000133935/ENSG00000067064/ENSG00000019186/ENSG00000151632/ENSG00000110921/ENSG00000109929/ENSG00000006025/ENSG00000095596/ENSG00000169710/ENSG00000196139/ENSG00000113161/ENSG00000132196/ENSG00000079435/ENSG00000163659/ENSG00000159348/ENSG00000167508/ENSG00000164211/ENSG00000131473…	MSMO1/HMGCS1/FDFT1/INSIG1/SREBF1/DHCR7/AKR1C1/ERG28/IDI1/CYP24A1/AKR1C2/MVK/SC5D/OSBPL7/CYP26A1/FASN/AKR1C3/HMGCR/HSD17B7/LIPE/TIPARP/CYB5R1/MVD/STARD4/ACLY/SNAI2/FDPS/CYP11A1/PCSK9/OSBPL9/ADM/NPC1/CYP1A1/STARD3NL/ATP8B1/CYP51A1/SP1/LDLR/BMP2/SQLE/LBR/ABCA1/CH25H/INSIG2/CLN8/SULT2B1/GPAM/CEL/LHB/RORA/HSD11B1/CYB5R2/HSD17B11/APOE/RDH8/TFCP2L1/DGAT2/GFI1/CYP2D6/NR0B2/CES1/FAXDC2/BAAT/NR5A2/AKR1B15/…	70	50	ENSG00000052802/ENSG00000112972/ENSG00000079459/ENSG00000186480/ENSG00000072310/ENSG00000172893/ENSG00000133935/ENSG00000067064/ENSG00000019186/ENSG00000110921/ENSG00000109929/ENSG00000006025/ENSG00000095596/ENSG00000169710/ENSG00000113161/ENSG00000132196/ENSG00000079435/ENSG00000163659/ENSG00000167508/ENSG00000164211/ENSG00000131473/ENSG00000160752/ENSG00000140459/ENSG00000169174/ENSG00000117859…	20	ENSG00000187134/ENSG00000151632/ENSG00000196139/ENSG00000159348/ENSG00000019549/ENSG00000125845/ENSG00000182372/ENSG00000088002/ENSG00000119927/ENSG00000166394/ENSG00000130203/ENSG00000080511/ENSG00000115112/ENSG00000062282/ENSG00000100197/ENSG00000198848/ENSG00000136881/ENSG00000227471/ENSG00000170099/ENSG00000106258
BP	GO:0006694	steroid biosynthetic process	47/2247	168/14943	1.0973e-05	0.00518383	ENSG00000052802/ENSG00000112972/ENSG00000079459/ENSG00000186480/ENSG00000072310/ENSG00000172893/ENSG00000133935/ENSG00000067064/ENSG00000110921/ENSG00000109929/ENSG00000006025/ENSG00000169710/ENSG00000196139/ENSG00000113161/ENSG00000132196/ENSG00000159348/ENSG00000167508/ENSG00000164211/ENSG00000131473/ENSG00000019549/ENSG00000160752/ENSG00000140459/ENSG00000117859/ENSG00000148926/ENSG00000010270…	MSMO1/HMGCS1/FDFT1/INSIG1/SREBF1/DHCR7/ERG28/IDI1/MVK/SC5D/OSBPL7/FASN/AKR1C3/HMGCR/HSD17B7/CYB5R1/MVD/STARD4/ACLY/SNAI2/FDPS/CYP11A1/OSBPL9/ADM/STARD3NL/CYP51A1/SP1/BMP2/SQLE/LBR/CH25H/INSIG2/GPAM/LHB/HSD11B1/CYB5R2/HSD17B11/APOE/RDH8/TFCP2L1/GFI1/CES1/FAXDC2/BAAT/AKR1B15/PROX1/PPARGC1A	47	35	ENSG00000052802/ENSG00000112972/ENSG00000079459/ENSG00000186480/ENSG00000072310/ENSG00000172893/ENSG00000133935/ENSG00000067064/ENSG00000110921/ENSG00000109929/ENSG00000006025/ENSG00000169710/ENSG00000113161/ENSG00000132196/ENSG00000167508/ENSG00000164211/ENSG00000131473/ENSG00000160752/ENSG00000140459/ENSG00000117859/ENSG00000148926/ENSG00000010270/ENSG00000001630/ENSG00000185591/ENSG00000104549…	12	ENSG00000196139/ENSG00000159348/ENSG00000019549/ENSG00000125845/ENSG00000119927/ENSG00000166394/ENSG00000130203/ENSG00000080511/ENSG00000115112/ENSG00000198848/ENSG00000136881/ENSG00000227471
BP	GO:0003281	ventricular septum development	23/2247	63/14943	2.20937e-05	0.00963454	ENSG00000137868/ENSG00000057657/ENSG00000137834/ENSG00000107485/ENSG00000162775/ENSG00000101115/ENSG00000164442/ENSG00000114315/ENSG00000142871/ENSG00000180340/ENSG00000164683/ENSG00000135547/ENSG00000127418/ENSG00000169641/ENSG00000107882/ENSG00000215417/ENSG00000197603/ENSG00000135111/ENSG00000125618/ENSG00000092969/ENSG00000085741/ENSG00000117707/ENSG00000183691	STRA6/PRDM1/SMAD6/GATA3/RBM15/SALL4/CITED2/HES1/CYR61/FZD2/HEY1/HEY2/FGFRL1/LUZP1/SUFU/MIR17HG/CPLANE1/TBX3/PAX8/TGFB2/WNT11/PROX1/NOG	23	14	ENSG00000137868/ENSG00000137834/ENSG00000107485/ENSG00000162775/ENSG00000101115/ENSG00000114315/ENSG00000180340/ENSG00000164683/ENSG00000135547/ENSG00000107882/ENSG00000092969/ENSG00000085741/ENSG00000117707/ENSG00000183691	9	ENSG00000057657/ENSG00000164442/ENSG00000142871/ENSG00000127418/ENSG00000169641/ENSG00000215417/ENSG00000197603/ENSG00000135111/ENSG00000125618
BP	GO:0034698	response to gonadotropin	13/2247	26/14943	2.93288e-05	0.0118761	ENSG00000112972/ENSG00000122641/ENSG00000165474/ENSG00000136943/ENSG00000090339/ENSG00000105641/ENSG00000145386/ENSG00000141448/ENSG00000070669/ENSG00000182752/ENSG00000184349/ENSG00000125618/ENSG00000109819	HMGCS1/INHBA/GJB2/CTSV/ICAM1/SLC5A5/CCNA2/GATA6/ASNS/PAPPA/EFNA5/PAX8/PPARGC1A	13	8	ENSG00000112972/ENSG00000090339/ENSG00000105641/ENSG00000145386/ENSG00000141448/ENSG00000182752/ENSG00000184349/ENSG00000109819	5	ENSG00000122641/ENSG00000165474/ENSG00000136943/ENSG00000070669/ENSG00000125618
BP	GO:1902653	secondary alcohol biosynthetic process	24/2247	69/14943	3.7238e-05	0.0140735	ENSG00000052802/ENSG00000112972/ENSG00000079459/ENSG00000186480/ENSG00000072310/ENSG00000172893/ENSG00000133935/ENSG00000067064/ENSG00000110921/ENSG00000109929/ENSG00000169710/ENSG00000113161/ENSG00000132196/ENSG00000167508/ENSG00000131473/ENSG00000160752/ENSG00000001630/ENSG00000185591/ENSG00000104549/ENSG00000143815/ENSG00000125629/ENSG00000119927/ENSG00000130203/ENSG00000198848	MSMO1/HMGCS1/FDFT1/INSIG1/SREBF1/DHCR7/ERG28/IDI1/MVK/SC5D/FASN/HMGCR/HSD17B7/MVD/ACLY/FDPS/CYP51A1/SP1/SQLE/LBR/INSIG2/GPAM/APOE/CES1	24	21	ENSG00000052802/ENSG00000112972/ENSG00000079459/ENSG00000186480/ENSG00000072310/ENSG00000172893/ENSG00000133935/ENSG00000067064/ENSG00000110921/ENSG00000109929/ENSG00000169710/ENSG00000113161/ENSG00000132196/ENSG00000167508/ENSG00000131473/ENSG00000160752/ENSG00000001630/ENSG00000185591/ENSG00000104549/ENSG00000143815/ENSG00000125629	3	ENSG00000119927/ENSG00000130203/ENSG00000198848
BP	GO:0071636	positive regulation of transforming growth factor beta production	10/2247	17/14943	4.0733e-05	0.0144322	ENSG00000073756/ENSG00000137801/ENSG00000168961/ENSG00000166949/ENSG00000117335/ENSG00000115966/ENSG00000118513/ENSG00000085741/ENSG00000006210/ENSG00000167711	PTGS2/THBS1/LGALS9/SMAD3/CD46/ATF2/MYB/WNT11/CX3CL1/SERPINF2	10	8	ENSG00000168961/ENSG00000166949/ENSG00000117335/ENSG00000115966/ENSG00000118513/ENSG00000085741/ENSG00000006210/ENSG00000167711	2	ENSG00000073756/ENSG00000137801
BP	GO:0016125	sterol metabolic process	40/2247	144/14943	5.73084e-05	0.0191107	ENSG00000052802/ENSG00000112972/ENSG00000079459/ENSG00000186480/ENSG00000072310/ENSG00000172893/ENSG00000133935/ENSG00000067064/ENSG00000110921/ENSG00000109929/ENSG00000095596/ENSG00000169710/ENSG00000113161/ENSG00000132196/ENSG00000079435/ENSG00000159348/ENSG00000167508/ENSG00000131473/ENSG00000160752/ENSG00000140459/ENSG00000169174/ENSG00000141458/ENSG00000001630/ENSG00000185591/ENSG00000130164…	MSMO1/HMGCS1/FDFT1/INSIG1/SREBF1/DHCR7/ERG28/IDI1/MVK/SC5D/CYP26A1/FASN/HMGCR/HSD17B7/LIPE/CYB5R1/MVD/ACLY/FDPS/CYP11A1/PCSK9/NPC1/CYP51A1/SP1/LDLR/SQLE/LBR/ABCA1/CH25H/INSIG2/CLN8/SULT2B1/GPAM/CEL/CYB5R2/APOE/DGAT2/NR0B2/CES1/FAXDC2	40	32	ENSG00000052802/ENSG00000112972/ENSG00000079459/ENSG00000186480/ENSG00000072310/ENSG00000172893/ENSG00000133935/ENSG00000067064/ENSG00000110921/ENSG00000109929/ENSG00000095596/ENSG00000169710/ENSG00000113161/ENSG00000132196/ENSG00000079435/ENSG00000167508/ENSG00000131473/ENSG00000160752/ENSG00000140459/ENSG00000169174/ENSG00000141458/ENSG00000001630/ENSG00000185591/ENSG00000130164/ENSG00000104549…	8	ENSG00000159348/ENSG00000182372/ENSG00000088002/ENSG00000119927/ENSG00000166394/ENSG00000130203/ENSG00000062282/ENSG00000198848
BP	GO:0006695	cholesterol biosynthetic process	23/2247	67/14943	6.79342e-05	0.0213955	ENSG00000052802/ENSG00000112972/ENSG00000079459/ENSG00000186480/ENSG00000072310/ENSG00000172893/ENSG00000067064/ENSG00000110921/ENSG00000109929/ENSG00000169710/ENSG00000113161/ENSG00000132196/ENSG00000167508/ENSG00000131473/ENSG00000160752/ENSG00000001630/ENSG00000185591/ENSG00000104549/ENSG00000143815/ENSG00000125629/ENSG00000119927/ENSG00000130203/ENSG00000198848	MSMO1/HMGCS1/FDFT1/INSIG1/SREBF1/DHCR7/IDI1/MVK/SC5D/FASN/HMGCR/HSD17B7/MVD/ACLY/FDPS/CYP51A1/SP1/SQLE/LBR/INSIG2/GPAM/APOE/CES1	23	20	ENSG00000052802/ENSG00000112972/ENSG00000079459/ENSG00000186480/ENSG00000072310/ENSG00000172893/ENSG00000067064/ENSG00000110921/ENSG00000109929/ENSG00000169710/ENSG00000113161/ENSG00000132196/ENSG00000167508/ENSG00000131473/ENSG00000160752/ENSG00000001630/ENSG00000185591/ENSG00000104549/ENSG00000143815/ENSG00000125629	3	ENSG00000119927/ENSG00000130203/ENSG00000198848
BP	GO:1901615	organic hydroxy compound metabolic process	97/2247	449/14943	0.000102711	0.0290297	ENSG00000052802/ENSG00000112972/ENSG00000079459/ENSG00000151689/ENSG00000165092/ENSG00000131069/ENSG00000186480/ENSG00000072310/ENSG00000120899/ENSG00000172893/ENSG00000187134/ENSG00000133935/ENSG00000067064/ENSG00000019186/ENSG00000110921/ENSG00000109929/ENSG00000006025/ENSG00000162496/ENSG00000095596/ENSG00000169710/ENSG00000196139/ENSG00000113161/ENSG00000107485/ENSG00000132196/ENSG00000079435…	MSMO1/HMGCS1/FDFT1/INPP1/ALDH1A1/ACSS2/INSIG1/SREBF1/PTK2B/DHCR7/AKR1C1/ERG28/IDI1/CYP24A1/MVK/SC5D/OSBPL7/DHRS3/CYP26A1/FASN/AKR1C3/HMGCR/GATA3/HSD17B7/LIPE/DUOXA1/CYB5R1/PTEN/MVD/DUOX1/STARD4/ACLY/SNAI2/FDPS/PFKFB2/CYP11A1/MYO5A/PCSK9/PSAT1/OSBPL9/NPC1/PLCH2/CYP1A1/ATP8B1/CYP51A1/SP1/SLC5A5/SPTLC2/ADH7/LDLR/BMP2/SQLE/INPP4B/LBR/MINPP1/AKR1B10/FOXE1/ALDH3B2/LRAT/ABCA1/CH25H/MAOB/INSIG2/CLN8/SULT…	97	60	ENSG00000052802/ENSG00000112972/ENSG00000079459/ENSG00000151689/ENSG00000131069/ENSG00000186480/ENSG00000072310/ENSG00000120899/ENSG00000172893/ENSG00000133935/ENSG00000067064/ENSG00000019186/ENSG00000110921/ENSG00000109929/ENSG00000006025/ENSG00000162496/ENSG00000095596/ENSG00000169710/ENSG00000113161/ENSG00000107485/ENSG00000132196/ENSG00000079435/ENSG00000171862/ENSG00000167508/ENSG00000164211…	37	ENSG00000165092/ENSG00000187134/ENSG00000196139/ENSG00000140254/ENSG00000159348/ENSG00000137857/ENSG00000019549/ENSG00000123836/ENSG00000197535/ENSG00000135069/ENSG00000149527/ENSG00000196344/ENSG00000125845/ENSG00000198074/ENSG00000178919/ENSG00000132746/ENSG00000121207/ENSG00000069535/ENSG00000182372/ENSG00000088002/ENSG00000119927/ENSG00000125618/ENSG00000164850/ENSG00000166394/ENSG00000185133…
BP	GO:0071496	cellular response to external stimulus	67/2247	287/14943	0.00011668	0.0290297	ENSG00000137193/ENSG00000073756/ENSG00000111321/ENSG00000110497/ENSG00000072310/ENSG00000172936/ENSG00000136943/ENSG00000175592/ENSG00000130956/ENSG00000213445/ENSG00000254087/ENSG00000125347/ENSG00000019186/ENSG00000091409/ENSG00000152661/ENSG00000134294/ENSG00000196139/ENSG00000135821/ENSG00000147883/ENSG00000090339/ENSG00000030110/ENSG00000019549/ENSG00000179295/ENSG00000183696/ENSG00000164136…	PIM1/PTGS2/LTBR/AMBRA1/SREBF1/MYD88/CTSV/FOSL1/HABP4/SIPA1/LYN/IRF1/CYP24A1/ITGA6/GJA1/SLC38A2/AKR1C3/GLUL/CDKN2B/ICAM1/BAK1/SNAI2/PTPN11/UPP1/IL15/XBP1/STK24/PCSK9/DSC2/PTGER4/BCL10/AOC1/SZT2/MAP3K14/EIF2AK3/PMAIP1/DAPL1/CASTOR1/ZFYVE1/PLEKHF2/MAP3K5/USF1/FOXO1/ASNS/NUAK2/PDK4/GDAP1/TNFRSF1A/SESN1/FAS/UCN2/TRPV1/PLEKHF1/TLR3/KCNB1/DEPDC5/BMT2/MAP3K1/GABARAP/WNT11/FOLR1/CADPS2/KRT20/UCP2/CBS/PCK1…	67	40	ENSG00000137193/ENSG00000111321/ENSG00000110497/ENSG00000072310/ENSG00000130956/ENSG00000213445/ENSG00000254087/ENSG00000125347/ENSG00000019186/ENSG00000135821/ENSG00000090339/ENSG00000030110/ENSG00000183696/ENSG00000164136/ENSG00000102572/ENSG00000169174/ENSG00000142867/ENSG00000002726/ENSG00000006062/ENSG00000172071/ENSG00000239282/ENSG00000165861/ENSG00000175895/ENSG00000197442/ENSG00000158773…	27	ENSG00000073756/ENSG00000172936/ENSG00000136943/ENSG00000175592/ENSG00000091409/ENSG00000152661/ENSG00000134294/ENSG00000196139/ENSG00000147883/ENSG00000019549/ENSG00000179295/ENSG00000100219/ENSG00000134755/ENSG00000171522/ENSG00000198198/ENSG00000141682/ENSG00000163331/ENSG00000070669/ENSG00000104381/ENSG00000145040/ENSG00000196689/ENSG00000166289/ENSG00000158445/ENSG00000110195/ENSG00000171431…
BP	GO:0003279	cardiac septum development	29/2247	96/14943	0.000117758	0.0290297	ENSG00000137868/ENSG00000057657/ENSG00000118257/ENSG00000137834/ENSG00000162496/ENSG00000107485/ENSG00000162775/ENSG00000099250/ENSG00000101115/ENSG00000141448/ENSG00000164442/ENSG00000114315/ENSG00000142871/ENSG00000180340/ENSG00000164683/ENSG00000135547/ENSG00000127418/ENSG00000169641/ENSG00000113196/ENSG00000107882/ENSG00000215417/ENSG00000197603/ENSG00000135111/ENSG00000125618/ENSG00000092969…	STRA6/PRDM1/NRP2/SMAD6/DHRS3/GATA3/RBM15/NRP1/SALL4/GATA6/CITED2/HES1/CYR61/FZD2/HEY1/HEY2/FGFRL1/LUZP1/HAND1/SUFU/MIR17HG/CPLANE1/TBX3/PAX8/TGFB2/WNT11/PROX1/RARB/NOG	29	20	ENSG00000137868/ENSG00000118257/ENSG00000137834/ENSG00000162496/ENSG00000107485/ENSG00000162775/ENSG00000099250/ENSG00000101115/ENSG00000141448/ENSG00000114315/ENSG00000180340/ENSG00000164683/ENSG00000135547/ENSG00000113196/ENSG00000107882/ENSG00000092969/ENSG00000085741/ENSG00000117707/ENSG00000077092/ENSG00000183691	9	ENSG00000057657/ENSG00000164442/ENSG00000142871/ENSG00000127418/ENSG00000169641/ENSG00000215417/ENSG00000197603/ENSG00000135111/ENSG00000125618
BP	GO:0010469	regulation of signaling receptor activity	92/2247	423/14943	0.000119263	0.0290297	ENSG00000087494/ENSG00000122641/ENSG00000121858/ENSG00000114796/ENSG00000113739/ENSG00000107984/ENSG00000125657/ENSG00000120899/ENSG00000188064/ENSG00000105835/ENSG00000136688/ENSG00000150551/ENSG00000184502/ENSG00000125726/ENSG00000196730/ENSG00000158458/ENSG00000184371/ENSG00000171862/ENSG00000188373/ENSG00000109321/ENSG00000115009/ENSG00000171132/ENSG00000136999/ENSG00000110492/ENSG00000164136…	PTHLH/INHBA/TNFSF10/KLHL24/STC2/DKK1/TNFSF9/PTK2B/WNT7B/NAMPT/IL36G/LYPD1/GAST/CD70/DAPK1/NRG2/CSF1/PTEN/C10orf99/AREG/CCL20/PRKCE/NOV/MDK/IL15/SLURP2/CCL26/CMTM7/FAM3C/PCSK9/NRP1/CMTM8/IL11/HBEGF/ADM/CCL2/TNFRSF11B/IL24/EDN1/IL6/CACNG8/IL36RN/NRG4/BMP3/LYNX1/PHLDA2/CNIH2/BMP2/CXCL8/MEF2C/AMH/VGF/GMFB/LTB/SHANK3/CXCL6/IL16/PDGFD/LYNX1-SLURP2/ADM2/UCN2/CXCL1/CGB7/CXCL14/LHB/CCL4L2/IL1F10/CKLF/CSF3…	92	41	ENSG00000121858/ENSG00000114796/ENSG00000125657/ENSG00000120899/ENSG00000188064/ENSG00000105835/ENSG00000150551/ENSG00000125726/ENSG00000196730/ENSG00000158458/ENSG00000184371/ENSG00000171862/ENSG00000171132/ENSG00000110492/ENSG00000164136/ENSG00000006606/ENSG00000153551/ENSG00000196937/ENSG00000169174/ENSG00000099250/ENSG00000170293/ENSG00000148926/ENSG00000108691/ENSG00000169752/ENSG00000152785…	51	ENSG00000087494/ENSG00000122641/ENSG00000113739/ENSG00000107984/ENSG00000136688/ENSG00000184502/ENSG00000188373/ENSG00000109321/ENSG00000115009/ENSG00000136999/ENSG00000283992/ENSG00000095752/ENSG00000113070/ENSG00000164761/ENSG00000162892/ENSG00000078401/ENSG00000136244/ENSG00000142408/ENSG00000136695/ENSG00000180155/ENSG00000181649/ENSG00000174871/ENSG00000125845/ENSG00000169429/ENSG00000104899…
BP	GO:0050810	regulation of steroid biosynthetic process	25/2247	78/14943	0.000119867	0.0290297	ENSG00000112972/ENSG00000079459/ENSG00000186480/ENSG00000072310/ENSG00000172893/ENSG00000067064/ENSG00000110921/ENSG00000109929/ENSG00000169710/ENSG00000196139/ENSG00000113161/ENSG00000167508/ENSG00000164211/ENSG00000019549/ENSG00000160752/ENSG00000001630/ENSG00000185591/ENSG00000125845/ENSG00000104549/ENSG00000125629/ENSG00000119927/ENSG00000130203/ENSG00000162676/ENSG00000117707/ENSG00000109819	HMGCS1/FDFT1/INSIG1/SREBF1/DHCR7/IDI1/MVK/SC5D/FASN/AKR1C3/HMGCR/MVD/STARD4/SNAI2/FDPS/CYP51A1/SP1/BMP2/SQLE/INSIG2/GPAM/APOE/GFI1/PROX1/PPARGC1A	25	20	ENSG00000112972/ENSG00000079459/ENSG00000186480/ENSG00000072310/ENSG00000172893/ENSG00000067064/ENSG00000110921/ENSG00000109929/ENSG00000169710/ENSG00000113161/ENSG00000167508/ENSG00000164211/ENSG00000160752/ENSG00000001630/ENSG00000185591/ENSG00000104549/ENSG00000125629/ENSG00000162676/ENSG00000117707/ENSG00000109819	5	ENSG00000196139/ENSG00000019549/ENSG00000125845/ENSG00000119927/ENSG00000130203
BP	GO:0071604	transforming growth factor beta production	13/2247	29/14943	0.000122899	0.0290297	ENSG00000073756/ENSG00000137801/ENSG00000168961/ENSG00000168056/ENSG00000166949/ENSG00000117335/ENSG00000115966/ENSG00000118513/ENSG00000141448/ENSG00000092969/ENSG00000085741/ENSG00000006210/ENSG00000167711	PTGS2/THBS1/LGALS9/LTBP3/SMAD3/CD46/ATF2/MYB/GATA6/TGFB2/WNT11/CX3CL1/SERPINF2	13	11	ENSG00000168961/ENSG00000168056/ENSG00000166949/ENSG00000117335/ENSG00000115966/ENSG00000118513/ENSG00000141448/ENSG00000092969/ENSG00000085741/ENSG00000006210/ENSG00000167711	2	ENSG00000073756/ENSG00000137801
BP	GO:0003007	heart morphogenesis	54/2247	221/14943	0.0001525	0.0334331	ENSG00000137193/ENSG00000096696/ENSG00000105429/ENSG00000107984/ENSG00000118257/ENSG00000137834/ENSG00000166949/ENSG00000152661/ENSG00000162496/ENSG00000107485/ENSG00000019549/ENSG00000147050/ENSG00000162775/ENSG00000169242/ENSG00000099250/ENSG00000125850/ENSG00000057294/ENSG00000154734/ENSG00000115966/ENSG00000141448/ENSG00000138802/ENSG00000103034/ENSG00000164741/ENSG00000139219/ENSG00000125845…	PIM1/DSP/MEGF8/DKK1/NRP2/SMAD6/SMAD3/GJA1/DHRS3/GATA3/SNAI2/KDM6A/RBM15/EFNA1/NRP1/OVOL2/PKP2/ADAMTS1/ATF2/GATA6/SEC24B/NDRG4/DLC1/COL2A1/BMP2/CITED2/HES1/TWIST1/CYR61/FZD2/MEF2C/HEY1/HEY2/FGFRL1/SETDB2/ZMIZ1/TTN/HAND1/SUFU/FLRT2/MIR17HG/TNNT2/TBX3/WNT16/TGFB2/OLFM1/MYOM2/WNT11/TNNI1/FOLR1/MSX1/PROX1/RARB/NOG	54	34	ENSG00000137193/ENSG00000118257/ENSG00000137834/ENSG00000166949/ENSG00000162496/ENSG00000107485/ENSG00000147050/ENSG00000162775/ENSG00000169242/ENSG00000099250/ENSG00000125850/ENSG00000057294/ENSG00000115966/ENSG00000141448/ENSG00000138802/ENSG00000164741/ENSG00000139219/ENSG00000114315/ENSG00000122691/ENSG00000180340/ENSG00000081189/ENSG00000164683/ENSG00000135547/ENSG00000136169/ENSG00000108175…	20	ENSG00000096696/ENSG00000105429/ENSG00000107984/ENSG00000152661/ENSG00000019549/ENSG00000154734/ENSG00000103034/ENSG00000125845/ENSG00000164442/ENSG00000142871/ENSG00000127418/ENSG00000155657/ENSG00000185070/ENSG00000215417/ENSG00000118194/ENSG00000135111/ENSG00000130558/ENSG00000036448/ENSG00000159173/ENSG00000110195
BP	GO:0070228	regulation of lymphocyte apoptotic process	18/2247	49/14943	0.0001543	0.0334331	ENSG00000157514/ENSG00000168961/ENSG00000254087/ENSG00000196839/ENSG00000171862/ENSG00000169242/ENSG00000142867/ENSG00000166925/ENSG00000107099/ENSG00000196950/ENSG00000120217/ENSG00000119927/ENSG00000131203/ENSG00000215417/ENSG00000129465/ENSG00000101197/ENSG00000196684/ENSG00000105639	TSC22D3/LGALS9/LYN/ADA/PTEN/EFNA1/BCL10/TSC22D4/DOCK8/SLC39A10/CD274/GPAM/IDO1/MIR17HG/RIPK3/BIRC7/HSH2D/JAK3	18	14	ENSG00000157514/ENSG00000168961/ENSG00000254087/ENSG00000196839/ENSG00000171862/ENSG00000169242/ENSG00000142867/ENSG00000166925/ENSG00000107099/ENSG00000120217/ENSG00000131203/ENSG00000101197/ENSG00000196684/ENSG00000105639	4	ENSG00000196950/ENSG00000119927/ENSG00000215417/ENSG00000129465
BP	GO:0010837	regulation of keratinocyte proliferation	12/2247	26/14943	0.000159233	0.0334331	ENSG00000175793/ENSG00000136943/ENSG00000125266/ENSG00000124193/ENSG00000019549/ENSG00000092295/ENSG00000125850/ENSG00000128016/ENSG00000261150/ENSG00000119138/ENSG00000166263/ENSG00000126233	SFN/CTSV/EFNB2/SRSF6/SNAI2/TGM1/OVOL2/ZFP36/EPPK1/KLF9/STXBP4/SLURP1	12	3	ENSG00000125850/ENSG00000128016/ENSG00000119138	9	ENSG00000175793/ENSG00000136943/ENSG00000125266/ENSG00000124193/ENSG00000019549/ENSG00000092295/ENSG00000261150/ENSG00000166263/ENSG00000126233
BP	GO:0006066	alcohol metabolic process	68/2247	297/14943	0.000191869	0.0384831	ENSG00000052802/ENSG00000112972/ENSG00000079459/ENSG00000151689/ENSG00000165092/ENSG00000131069/ENSG00000186480/ENSG00000072310/ENSG00000120899/ENSG00000172893/ENSG00000133935/ENSG00000067064/ENSG00000110921/ENSG00000109929/ENSG00000162496/ENSG00000169710/ENSG00000196139/ENSG00000113161/ENSG00000132196/ENSG00000079435/ENSG00000171862/ENSG00000167508/ENSG00000131473/ENSG00000160752/ENSG00000140459…	MSMO1/HMGCS1/FDFT1/INPP1/ALDH1A1/ACSS2/INSIG1/SREBF1/PTK2B/DHCR7/ERG28/IDI1/MVK/SC5D/DHRS3/FASN/AKR1C3/HMGCR/HSD17B7/LIPE/PTEN/MVD/ACLY/FDPS/CYP11A1/PCSK9/NPC1/PLCH2/CYP51A1/SP1/SPTLC2/ADH7/LDLR/SQLE/INPP4B/LBR/MINPP1/AKR1B10/ALDH3B2/LRAT/ABCA1/CH25H/INSIG2/CLN8/SULT2B1/GPAM/CEL/NAPEPLD/GPER1/INPP5J/APOE/RDH8/IPMK/DGAT2/DHDDS/PLCB2/GFI1/FGF2/NR0B2/CES1/PLD4/RPE65/RDH12/PCK1/SGPP2/PLCH1/INPP5D/PLC…	68	46	ENSG00000052802/ENSG00000112972/ENSG00000079459/ENSG00000151689/ENSG00000131069/ENSG00000186480/ENSG00000072310/ENSG00000120899/ENSG00000172893/ENSG00000133935/ENSG00000067064/ENSG00000110921/ENSG00000109929/ENSG00000162496/ENSG00000169710/ENSG00000113161/ENSG00000132196/ENSG00000079435/ENSG00000171862/ENSG00000167508/ENSG00000131473/ENSG00000160752/ENSG00000140459/ENSG00000169174/ENSG00000141458…	22	ENSG00000165092/ENSG00000196139/ENSG00000149527/ENSG00000196344/ENSG00000198074/ENSG00000132746/ENSG00000121207/ENSG00000182372/ENSG00000088002/ENSG00000119927/ENSG00000164850/ENSG00000185133/ENSG00000130203/ENSG00000080511/ENSG00000062282/ENSG00000137841/ENSG00000138685/ENSG00000198848/ENSG00000166428/ENSG00000116745/ENSG00000163082/ENSG00000168918
BP	GO:0032526	response to retinoic acid	28/2247	94/14943	0.000199574	0.0384831	ENSG00000148344/ENSG00000072310/ENSG00000165474/ENSG00000107984/ENSG00000120899/ENSG00000188064/ENSG00000254087/ENSG00000129355/ENSG00000152661/ENSG00000172819/ENSG00000204516/ENSG00000197081/ENSG00000111186/ENSG00000188910/ENSG00000118513/ENSG00000136826/ENSG00000120129/ENSG00000115457/ENSG00000165029/ENSG00000186010/ENSG00000132386/ENSG00000104381/ENSG00000085741/ENSG00000111432/ENSG00000198963…	PTGES/SREBF1/GJB2/DKK1/PTK2B/WNT7B/LYN/CDKN2D/GJA1/RARG/MICB/IGF2R/WNT5B/GJB3/MYB/KLF4/DUSP1/IGFBP2/ABCA1/NDUFA13/SERPINF1/GDAP1/WNT11/FZD10/RORB/RARB/PCK1/ZNF35	28	18	ENSG00000148344/ENSG00000072310/ENSG00000120899/ENSG00000188064/ENSG00000254087/ENSG00000129355/ENSG00000172819/ENSG00000204516/ENSG00000111186/ENSG00000118513/ENSG00000165029/ENSG00000186010/ENSG00000132386/ENSG00000085741/ENSG00000111432/ENSG00000198963/ENSG00000077092/ENSG00000124253	10	ENSG00000165474/ENSG00000107984/ENSG00000152661/ENSG00000197081/ENSG00000188910/ENSG00000136826/ENSG00000120129/ENSG00000115457/ENSG00000104381/ENSG00000169981
BP	GO:0046890	regulation of lipid biosynthetic process	40/2247	152/14943	0.000205749	0.0384831	ENSG00000123983/ENSG00000165175/ENSG00000112972/ENSG00000079459/ENSG00000073756/ENSG00000186480/ENSG00000072310/ENSG00000012660/ENSG00000156671/ENSG00000172893/ENSG00000067064/ENSG00000110921/ENSG00000109929/ENSG00000169710/ENSG00000196139/ENSG00000113161/ENSG00000167508/ENSG00000164211/ENSG00000019549/ENSG00000160752/ENSG00000123353/ENSG00000151468/ENSG00000001630/ENSG00000185591/ENSG00000197296…	ACSL3/MID1IP1/HMGCS1/FDFT1/PTGS2/INSIG1/SREBF1/ELOVL5/SAMD8/DHCR7/IDI1/MVK/SC5D/FASN/AKR1C3/HMGCR/MVD/STARD4/SNAI2/FDPS/ORMDL2/CCDC3/CYP51A1/SP1/FITM2/LDLR/BMP2/SQLE/CYR61/PDK4/PLIN5/INSIG2/TNFRSF1A/GPAM/GPER1/APOE/DGAT2/GFI1/PROX1/PPARGC1A	40	28	ENSG00000123983/ENSG00000165175/ENSG00000112972/ENSG00000079459/ENSG00000186480/ENSG00000072310/ENSG00000012660/ENSG00000156671/ENSG00000172893/ENSG00000067064/ENSG00000110921/ENSG00000109929/ENSG00000169710/ENSG00000113161/ENSG00000167508/ENSG00000164211/ENSG00000160752/ENSG00000001630/ENSG00000185591/ENSG00000130164/ENSG00000104549/ENSG00000004799/ENSG00000214456/ENSG00000125629/ENSG00000067182…	12	ENSG00000073756/ENSG00000196139/ENSG00000019549/ENSG00000123353/ENSG00000151468/ENSG00000197296/ENSG00000125845/ENSG00000142871/ENSG00000119927/ENSG00000164850/ENSG00000130203/ENSG00000062282
BP	GO:0045540	regulation of cholesterol biosynthetic process	16/2247	42/14943	0.000217832	0.0384831	ENSG00000112972/ENSG00000079459/ENSG00000072310/ENSG00000172893/ENSG00000067064/ENSG00000110921/ENSG00000109929/ENSG00000169710/ENSG00000113161/ENSG00000167508/ENSG00000160752/ENSG00000001630/ENSG00000185591/ENSG00000104549/ENSG00000119927/ENSG00000130203	HMGCS1/FDFT1/SREBF1/DHCR7/IDI1/MVK/SC5D/FASN/HMGCR/MVD/FDPS/CYP51A1/SP1/SQLE/GPAM/APOE	16	14	ENSG00000112972/ENSG00000079459/ENSG00000072310/ENSG00000172893/ENSG00000067064/ENSG00000110921/ENSG00000109929/ENSG00000169710/ENSG00000113161/ENSG00000167508/ENSG00000160752/ENSG00000001630/ENSG00000185591/ENSG00000104549	2	ENSG00000119927/ENSG00000130203
BP	GO:0008203	cholesterol metabolic process	35/2247	128/14943	0.000226387	0.0384831	ENSG00000052802/ENSG00000112972/ENSG00000079459/ENSG00000186480/ENSG00000072310/ENSG00000172893/ENSG00000067064/ENSG00000110921/ENSG00000109929/ENSG00000169710/ENSG00000113161/ENSG00000132196/ENSG00000079435/ENSG00000167508/ENSG00000131473/ENSG00000160752/ENSG00000140459/ENSG00000169174/ENSG00000141458/ENSG00000001630/ENSG00000185591/ENSG00000130164/ENSG00000104549/ENSG00000143815/ENSG00000165029…	MSMO1/HMGCS1/FDFT1/INSIG1/SREBF1/DHCR7/IDI1/MVK/SC5D/FASN/HMGCR/HSD17B7/LIPE/MVD/ACLY/FDPS/CYP11A1/PCSK9/NPC1/CYP51A1/SP1/LDLR/SQLE/LBR/ABCA1/CH25H/INSIG2/CLN8/SULT2B1/GPAM/CEL/APOE/DGAT2/NR0B2/CES1	35	29	ENSG00000052802/ENSG00000112972/ENSG00000079459/ENSG00000186480/ENSG00000072310/ENSG00000172893/ENSG00000067064/ENSG00000110921/ENSG00000109929/ENSG00000169710/ENSG00000113161/ENSG00000132196/ENSG00000079435/ENSG00000167508/ENSG00000131473/ENSG00000160752/ENSG00000140459/ENSG00000169174/ENSG00000141458/ENSG00000001630/ENSG00000185591/ENSG00000130164/ENSG00000104549/ENSG00000143815/ENSG00000165029…	6	ENSG00000182372/ENSG00000088002/ENSG00000119927/ENSG00000130203/ENSG00000062282/ENSG00000198848
BP	GO:0010817	regulation of hormone levels	93/2247	436/14943	0.000226529	0.0384831	ENSG00000122641/ENSG00000165092/ENSG00000137868/ENSG00000072310/ENSG00000182782/ENSG00000075142/ENSG00000113739/ENSG00000254087/ENSG00000172893/ENSG00000187134/ENSG00000155380/ENSG00000167755/ENSG00000152661/ENSG00000151632/ENSG00000162496/ENSG00000095596/ENSG00000196139/ENSG00000113161/ENSG00000135821/ENSG00000107485/ENSG00000132196/ENSG00000053438/ENSG00000163659/ENSG00000140254/ENSG00000137857…	INHBA/ALDH1A1/STRA6/SREBF1/HCAR2/SRI/STC2/LYN/DHCR7/AKR1C1/SLC16A1/KLK6/GJA1/AKR1C2/DHRS3/CYP26A1/AKR1C3/HMGCR/GLUL/GATA3/HSD17B7/NNAT/TIPARP/DUOXA1/DUOX1/CAMK2G/PRKCE/PFKFB2/NOV/PTPN11/CYP11A1/MYO5A/DYNLL1/STX1A/IL11/ADM/CYP1A1/KIF5B/RAB8B/STARD3NL/EDN1/IL6/IRS1/MYB/SLC5A5/KCNS3/ARNTL/ILDR1/ADH7/TIAM1/BMP2/MIDN/FOXA1/FOXE1/VGF/LRAT/SYBU/EFNA5/PCSK6/ACVR2B/LHB/TBX3/PAX8/GPER1/HSD11B1/KCNB1/KALRN/…	93	48	ENSG00000137868/ENSG00000072310/ENSG00000182782/ENSG00000075142/ENSG00000254087/ENSG00000172893/ENSG00000155380/ENSG00000167755/ENSG00000162496/ENSG00000095596/ENSG00000113161/ENSG00000135821/ENSG00000107485/ENSG00000132196/ENSG00000163659/ENSG00000148660/ENSG00000171132/ENSG00000140459/ENSG00000106089/ENSG00000148926/ENSG00000140465/ENSG00000166128/ENSG00000010270/ENSG00000118513/ENSG00000105641…	45	ENSG00000122641/ENSG00000165092/ENSG00000113739/ENSG00000187134/ENSG00000152661/ENSG00000151632/ENSG00000196139/ENSG00000053438/ENSG00000140254/ENSG00000137857/ENSG00000123836/ENSG00000136999/ENSG00000179295/ENSG00000197535/ENSG00000088986/ENSG00000095752/ENSG00000170759/ENSG00000078401/ENSG00000136244/ENSG00000169047/ENSG00000196344/ENSG00000125845/ENSG00000167470/ENSG00000178919/ENSG00000128564…
BP	GO:1902652	secondary alcohol metabolic process	36/2247	133/14943	0.000230804	0.0384831	ENSG00000052802/ENSG00000112972/ENSG00000079459/ENSG00000186480/ENSG00000072310/ENSG00000172893/ENSG00000133935/ENSG00000067064/ENSG00000110921/ENSG00000109929/ENSG00000169710/ENSG00000113161/ENSG00000132196/ENSG00000079435/ENSG00000167508/ENSG00000131473/ENSG00000160752/ENSG00000140459/ENSG00000169174/ENSG00000141458/ENSG00000001630/ENSG00000185591/ENSG00000130164/ENSG00000104549/ENSG00000143815…	MSMO1/HMGCS1/FDFT1/INSIG1/SREBF1/DHCR7/ERG28/IDI1/MVK/SC5D/FASN/HMGCR/HSD17B7/LIPE/MVD/ACLY/FDPS/CYP11A1/PCSK9/NPC1/CYP51A1/SP1/LDLR/SQLE/LBR/ABCA1/CH25H/INSIG2/CLN8/SULT2B1/GPAM/CEL/APOE/DGAT2/NR0B2/CES1	36	30	ENSG00000052802/ENSG00000112972/ENSG00000079459/ENSG00000186480/ENSG00000072310/ENSG00000172893/ENSG00000133935/ENSG00000067064/ENSG00000110921/ENSG00000109929/ENSG00000169710/ENSG00000113161/ENSG00000132196/ENSG00000079435/ENSG00000167508/ENSG00000131473/ENSG00000160752/ENSG00000140459/ENSG00000169174/ENSG00000141458/ENSG00000001630/ENSG00000185591/ENSG00000130164/ENSG00000104549/ENSG00000143815…	6	ENSG00000182372/ENSG00000088002/ENSG00000119927/ENSG00000130203/ENSG00000062282/ENSG00000198848
BP	GO:0045109	intermediate filament organization	10/2247	20/14943	0.000250707	0.0406074	ENSG00000096696/ENSG00000186847/ENSG00000114796/ENSG00000171403/ENSG00000128422/ENSG00000081277/ENSG00000173744/ENSG00000057294/ENSG00000261150/ENSG00000171431	DSP/KRT14/KLHL24/KRT9/KRT17/PKP1/AGFG1/PKP2/EPPK1/KRT20	10	3	ENSG00000114796/ENSG00000173744/ENSG00000057294	7	ENSG00000096696/ENSG00000186847/ENSG00000171403/ENSG00000128422/ENSG00000081277/ENSG00000261150/ENSG00000171431
BP	GO:0031668	cellular response to extracellular stimulus	53/2247	221/14943	0.000287259	0.0452354	ENSG00000137193/ENSG00000073756/ENSG00000110497/ENSG00000072310/ENSG00000136943/ENSG00000175592/ENSG00000213445/ENSG00000254087/ENSG00000019186/ENSG00000091409/ENSG00000134294/ENSG00000196139/ENSG00000135821/ENSG00000147883/ENSG00000090339/ENSG00000019549/ENSG00000183696/ENSG00000164136/ENSG00000100219/ENSG00000102572/ENSG00000169174/ENSG00000134755/ENSG00000002726/ENSG00000198198/ENSG00000172071…	PIM1/PTGS2/AMBRA1/SREBF1/CTSV/FOSL1/SIPA1/LYN/CYP24A1/ITGA6/SLC38A2/AKR1C3/GLUL/CDKN2B/ICAM1/SNAI2/UPP1/IL15/XBP1/STK24/PCSK9/DSC2/AOC1/SZT2/EIF2AK3/PMAIP1/DAPL1/CASTOR1/ZFYVE1/PLEKHF2/MAP3K5/USF1/FOXO1/ASNS/NUAK2/PDK4/GDAP1/SESN1/FAS/UCN2/TRPV1/PLEKHF1/KCNB1/DEPDC5/BMT2/GABARAP/FOLR1/CADPS2/KRT20/UCP2/CBS/PCK1/SLC1A2	53	30	ENSG00000137193/ENSG00000110497/ENSG00000072310/ENSG00000213445/ENSG00000254087/ENSG00000019186/ENSG00000135821/ENSG00000090339/ENSG00000183696/ENSG00000164136/ENSG00000102572/ENSG00000169174/ENSG00000002726/ENSG00000172071/ENSG00000239282/ENSG00000165861/ENSG00000175895/ENSG00000197442/ENSG00000158773/ENSG00000150907/ENSG00000163545/ENSG00000004799/ENSG00000080546/ENSG00000026103/ENSG00000100150…	23	ENSG00000073756/ENSG00000136943/ENSG00000175592/ENSG00000091409/ENSG00000134294/ENSG00000196139/ENSG00000147883/ENSG00000019549/ENSG00000100219/ENSG00000134755/ENSG00000198198/ENSG00000141682/ENSG00000163331/ENSG00000070669/ENSG00000104381/ENSG00000145040/ENSG00000196689/ENSG00000166289/ENSG00000158445/ENSG00000110195/ENSG00000171431/ENSG00000175567/ENSG00000160200
CC	GO:0001533	cornified envelope	32/2368	57/15750	7.92808e-13	5.14532e-10	ENSG00000169469/ENSG00000163216/ENSG00000241794/ENSG00000124102/ENSG00000167768/ENSG00000203783/ENSG00000163207/ENSG00000169474/ENSG00000096696/ENSG00000203785/ENSG00000143631/ENSG00000244094/ENSG00000081277/ENSG00000184148/ENSG00000092295/ENSG00000134755/ENSG00000136155/ENSG00000057294/ENSG00000134762/ENSG00000185966/ENSG00000215853/ENSG00000163202/ENSG00000134760/ENSG00000240386/ENSG00000175065…	SPRR1B/SPRR2D/SPRR2A/PI3/KRT1/PRR9/IVL/SPRR1A/DSP/SPRR2E/FLG/SPRR2F/PKP1/SPRR4/TGM1/DSC2/SCEL/PKP2/DSC3/LCE3E/RPTN/LCE3D/DSG1/LCE1F/DSG4/LCE1C/HRNR/LCE3A/LELP1/SPRR3/SPRR2B/DSC1	32	2	ENSG00000136155/ENSG00000057294	30	ENSG00000169469/ENSG00000163216/ENSG00000241794/ENSG00000124102/ENSG00000167768/ENSG00000203783/ENSG00000163207/ENSG00000169474/ENSG00000096696/ENSG00000203785/ENSG00000143631/ENSG00000244094/ENSG00000081277/ENSG00000184148/ENSG00000092295/ENSG00000134755/ENSG00000134762/ENSG00000185966/ENSG00000215853/ENSG00000163202/ENSG00000134760/ENSG00000240386/ENSG00000175065/ENSG00000197084/ENSG00000197915…
CC	GO:0045111	intermediate filament cytoskeleton	48/2368	164/15750	2.26941e-06	0.000736424	ENSG00000186832/ENSG00000167768/ENSG00000186081/ENSG00000185479/ENSG00000205420/ENSG00000096696/ENSG00000186847/ENSG00000151914/ENSG00000171403/ENSG00000128422/ENSG00000170465/ENSG00000143631/ENSG00000143546/ENSG00000170477/ENSG00000081277/ENSG00000152661/ENSG00000179335/ENSG00000178209/ENSG00000167767/ENSG00000197535/ENSG00000099250/ENSG00000057294/ENSG00000180921/ENSG00000186442/ENSG00000146872…	KRT16/KRT1/KRT5/KRT6B/KRT6A/DSP/KRT14/DST/KRT9/KRT17/KRT6C/FLG/S100A8/KRT4/PKP1/GJA1/CLK3/PLEC/KRT80/MYO5A/NRP1/PKP2/FAM83H/KRT3/TLK2/SYNE2/MDN1/CASP14/KRT77/EPPK1/EXOSC4/KRTAP13-2/MNS1/SESTD1/KRT76/KRT23/GPER1/PRPH/NOL9/SYNM/SHANK2/KRT36/KRTAP19-5/KRT20/CARMIL2/KRT87P/ADCY5/SYNC	48	8	ENSG00000179335/ENSG00000167767/ENSG00000099250/ENSG00000057294/ENSG00000146872/ENSG00000138587/ENSG00000187231/ENSG00000173175	40	ENSG00000186832/ENSG00000167768/ENSG00000186081/ENSG00000185479/ENSG00000205420/ENSG00000096696/ENSG00000186847/ENSG00000151914/ENSG00000171403/ENSG00000128422/ENSG00000170465/ENSG00000143631/ENSG00000143546/ENSG00000170477/ENSG00000081277/ENSG00000152661/ENSG00000178209/ENSG00000197535/ENSG00000180921/ENSG00000186442/ENSG00000054654/ENSG00000112159/ENSG00000105141/ENSG00000189182/ENSG00000261150…
CC	GO:0005882	intermediate filament	38/2368	126/15750	1.1678e-05	0.00252634	ENSG00000186832/ENSG00000167768/ENSG00000186081/ENSG00000185479/ENSG00000205420/ENSG00000096696/ENSG00000186847/ENSG00000151914/ENSG00000171403/ENSG00000128422/ENSG00000170465/ENSG00000143631/ENSG00000170477/ENSG00000081277/ENSG00000152661/ENSG00000167767/ENSG00000197535/ENSG00000099250/ENSG00000057294/ENSG00000180921/ENSG00000186442/ENSG00000146872/ENSG00000105141/ENSG00000189182/ENSG00000261150…	KRT16/KRT1/KRT5/KRT6B/KRT6A/DSP/KRT14/DST/KRT9/KRT17/KRT6C/FLG/KRT4/PKP1/GJA1/KRT80/MYO5A/NRP1/PKP2/FAM83H/KRT3/TLK2/CASP14/KRT77/EPPK1/KRTAP13-2/MNS1/KRT76/KRT23/GPER1/PRPH/SYNM/SHANK2/KRT36/KRTAP19-5/KRT20/KRT87P/SYNC	38	5	ENSG00000167767/ENSG00000099250/ENSG00000057294/ENSG00000146872/ENSG00000138587	33	ENSG00000186832/ENSG00000167768/ENSG00000186081/ENSG00000185479/ENSG00000205420/ENSG00000096696/ENSG00000186847/ENSG00000151914/ENSG00000171403/ENSG00000128422/ENSG00000170465/ENSG00000143631/ENSG00000170477/ENSG00000081277/ENSG00000152661/ENSG00000197535/ENSG00000180921/ENSG00000186442/ENSG00000105141/ENSG00000189182/ENSG00000261150/ENSG00000182816/ENSG00000185069/ENSG00000108244/ENSG00000164850…
MF	GO:0005125	cytokine activity	49/2288	169/14988	3.70535e-06	0.00274695	ENSG00000122641/ENSG00000121858/ENSG00000125657/ENSG00000105835/ENSG00000136688/ENSG00000125726/ENSG00000184371/ENSG00000188373/ENSG00000109321/ENSG00000115009/ENSG00000164136/ENSG00000006606/ENSG00000153551/ENSG00000196937/ENSG00000170293/ENSG00000095752/ENSG00000108691/ENSG00000164761/ENSG00000162892/ENSG00000078401/ENSG00000136244/ENSG00000136695/ENSG00000152785/ENSG00000125845/ENSG00000169429…	INHBA/TNFSF10/TNFSF9/NAMPT/IL36G/CD70/CSF1/C10orf99/AREG/CCL20/IL15/CCL26/CMTM7/FAM3C/CMTM8/IL11/CCL2/TNFRSF11B/IL24/EDN1/IL6/IL36RN/BMP3/BMP2/CXCL8/LTB/CXCL6/IL16/CXCL1/CXCL14/CCL4L2/IL1F10/CKLF/CSF3/IFNE/TGFB2/IL17C/IFNL1/CX3CL1/SLURP1/IL7/FGF2/CXCL3/IFNK/FLT3LG/CCL3L1/IFNL2/CNTF/GDF6	49	19	ENSG00000121858/ENSG00000125657/ENSG00000105835/ENSG00000125726/ENSG00000184371/ENSG00000164136/ENSG00000006606/ENSG00000153551/ENSG00000196937/ENSG00000170293/ENSG00000108691/ENSG00000152785/ENSG00000124875/ENSG00000217555/ENSG00000092969/ENSG00000006210/ENSG00000104432/ENSG00000090554/ENSG00000156466	30	ENSG00000122641/ENSG00000136688/ENSG00000188373/ENSG00000109321/ENSG00000115009/ENSG00000095752/ENSG00000164761/ENSG00000162892/ENSG00000078401/ENSG00000136244/ENSG00000136695/ENSG00000125845/ENSG00000169429/ENSG00000227507/ENSG00000172349/ENSG00000163739/ENSG00000145824/ENSG00000276070/ENSG00000136697/ENSG00000108342/ENSG00000184995/ENSG00000124391/ENSG00000182393/ENSG00000126233/ENSG00000138685…
MF	GO:0030280	structural constituent of epidermis	9/2288	12/14988	6.28771e-06	0.00274695	ENSG00000124102/ENSG00000167768/ENSG00000169474/ENSG00000203785/ENSG00000143631/ENSG00000081277/ENSG00000215853/ENSG00000197915/ENSG00000126337	PI3/KRT1/SPRR1A/SPRR2E/FLG/PKP1/RPTN/HRNR/KRT36	9	0		9	ENSG00000124102/ENSG00000167768/ENSG00000169474/ENSG00000203785/ENSG00000143631/ENSG00000081277/ENSG00000215853/ENSG00000197915/ENSG00000126337
MF	GO:0030545	receptor regulator activity	90/2288	379/14988	7.70894e-06	0.00274695	ENSG00000087494/ENSG00000122641/ENSG00000121858/ENSG00000164104/ENSG00000113739/ENSG00000107984/ENSG00000125657/ENSG00000125848/ENSG00000188064/ENSG00000105835/ENSG00000136688/ENSG00000150551/ENSG00000184502/ENSG00000125726/ENSG00000158458/ENSG00000184371/ENSG00000185033/ENSG00000188373/ENSG00000109321/ENSG00000115009/ENSG00000171132/ENSG00000136999/ENSG00000110492/ENSG00000164136/ENSG00000283992…	PTHLH/INHBA/TNFSF10/HMGB2/STC2/DKK1/TNFSF9/FLRT3/WNT7B/NAMPT/IL36G/LYPD1/GAST/CD70/NRG2/CSF1/SEMA4B/C10orf99/AREG/CCL20/PRKCE/NOV/MDK/IL15/SLURP2/CCL26/CMTM7/FAM3C/PCSK9/SAA2/CMTM8/IL11/HBEGF/ADM/CCL2/TNFRSF11B/IL24/EDN1/IL6/IL36RN/NRG4/BMP3/LYNX1/ADH7/BMP2/CXCL8/AMH/VGF/GMFB/LTB/CXCL6/IL16/PDGFD/EFNA5/LYNX1-SLURP2/ADM2/UCN2/CXCL1/FLRT2/ALKBH1/CGB7/CXCL14/LHB/CCL4L2/IL1F10/CKLF/CSF3/IFNE/TGFB2/SA…	90	40	ENSG00000121858/ENSG00000164104/ENSG00000125657/ENSG00000188064/ENSG00000105835/ENSG00000150551/ENSG00000125726/ENSG00000158458/ENSG00000184371/ENSG00000185033/ENSG00000171132/ENSG00000110492/ENSG00000164136/ENSG00000006606/ENSG00000153551/ENSG00000196937/ENSG00000169174/ENSG00000134339/ENSG00000170293/ENSG00000148926/ENSG00000108691/ENSG00000169752/ENSG00000152785/ENSG00000124875/ENSG00000170962…	50	ENSG00000087494/ENSG00000122641/ENSG00000113739/ENSG00000107984/ENSG00000125848/ENSG00000136688/ENSG00000184502/ENSG00000188373/ENSG00000109321/ENSG00000115009/ENSG00000136999/ENSG00000283992/ENSG00000095752/ENSG00000113070/ENSG00000164761/ENSG00000162892/ENSG00000078401/ENSG00000136244/ENSG00000136695/ENSG00000180155/ENSG00000196344/ENSG00000125845/ENSG00000169429/ENSG00000104899/ENSG00000128564…
MF	GO:0016709	oxidoreductase activity, acting on paired donors, with incorporation or reduction of molecular oxygen, NAD(P)H as one donor, and incorporation of one atom of oxygen	16/2288	37/14988	4.2969e-05	0.0114835	ENSG00000052802/ENSG00000007933/ENSG00000187134/ENSG00000151632/ENSG00000095596/ENSG00000196139/ENSG00000140459/ENSG00000089250/ENSG00000140465/ENSG00000001630/ENSG00000104549/ENSG00000138135/ENSG00000010932/ENSG00000076258/ENSG00000094963/ENSG00000170271	MSMO1/FMO3/AKR1C1/AKR1C2/CYP26A1/AKR1C3/CYP11A1/NOS1/CYP1A1/CYP51A1/SQLE/CH25H/FMO1/FMO4/FMO2/FAXDC2	16	12	ENSG00000052802/ENSG00000007933/ENSG00000095596/ENSG00000140459/ENSG00000140465/ENSG00000001630/ENSG00000104549/ENSG00000138135/ENSG00000010932/ENSG00000076258/ENSG00000094963/ENSG00000170271	4	ENSG00000187134/ENSG00000151632/ENSG00000196139/ENSG00000089250
MF	GO:0048018	receptor ligand activity	81/2288	353/14988	7.70157e-05	0.016466	ENSG00000087494/ENSG00000122641/ENSG00000121858/ENSG00000164104/ENSG00000113739/ENSG00000107984/ENSG00000125657/ENSG00000125848/ENSG00000188064/ENSG00000105835/ENSG00000136688/ENSG00000184502/ENSG00000125726/ENSG00000158458/ENSG00000184371/ENSG00000185033/ENSG00000188373/ENSG00000109321/ENSG00000115009/ENSG00000136999/ENSG00000110492/ENSG00000164136/ENSG00000006606/ENSG00000153551/ENSG00000196937…	PTHLH/INHBA/TNFSF10/HMGB2/STC2/DKK1/TNFSF9/FLRT3/WNT7B/NAMPT/IL36G/GAST/CD70/NRG2/CSF1/SEMA4B/C10orf99/AREG/CCL20/NOV/MDK/IL15/CCL26/CMTM7/FAM3C/SAA2/CMTM8/IL11/HBEGF/ADM/CCL2/TNFRSF11B/IL24/EDN1/IL6/IL36RN/NRG4/BMP3/BMP2/CXCL8/AMH/VGF/GMFB/LTB/CXCL6/IL16/PDGFD/EFNA5/ADM2/UCN2/CXCL1/FLRT2/ALKBH1/CGB7/CXCL14/LHB/CCL4L2/IL1F10/CKLF/CSF3/IFNE/TGFB2/SAA4/PSPN/IL17C/IFNL1/DEFB4A/CX3CL1/SLURP1/NGF/IL7/…	81	35	ENSG00000121858/ENSG00000164104/ENSG00000125657/ENSG00000188064/ENSG00000105835/ENSG00000125726/ENSG00000158458/ENSG00000184371/ENSG00000185033/ENSG00000110492/ENSG00000164136/ENSG00000006606/ENSG00000153551/ENSG00000196937/ENSG00000134339/ENSG00000170293/ENSG00000148926/ENSG00000108691/ENSG00000169752/ENSG00000152785/ENSG00000124875/ENSG00000170962/ENSG00000184349/ENSG00000100601/ENSG00000196337…	46	ENSG00000087494/ENSG00000122641/ENSG00000113739/ENSG00000107984/ENSG00000125848/ENSG00000136688/ENSG00000184502/ENSG00000188373/ENSG00000109321/ENSG00000115009/ENSG00000136999/ENSG00000095752/ENSG00000113070/ENSG00000164761/ENSG00000162892/ENSG00000078401/ENSG00000136244/ENSG00000136695/ENSG00000125845/ENSG00000169429/ENSG00000104899/ENSG00000128564/ENSG00000197045/ENSG00000227507/ENSG00000172349…
MF	GO:0000978	RNA polymerase II proximal promoter sequence-specific DNA binding	87/2288	392/14988	0.000147375	0.0260601	ENSG00000163435/ENSG00000123095/ENSG00000134107/ENSG00000072310/ENSG00000124813/ENSG00000075624/ENSG00000057657/ENSG00000175592/ENSG00000137834/ENSG00000125347/ENSG00000125740/ENSG00000166949/ENSG00000204103/ENSG00000136997/ENSG00000140455/ENSG00000119508/ENSG00000179094/ENSG00000107485/ENSG00000078399/ENSG00000139083/ENSG00000147050/ENSG00000198839/ENSG00000069812/ENSG00000124191/ENSG00000157557…	ELF3/BHLHE41/BHLHE40/SREBF1/RUNX2/ACTB/PRDM1/FOSL1/SMAD6/IRF1/FOSB/SMAD3/MAFB/MYC/USP3/NR4A3/PER1/GATA3/HOXA9/ETV6/KDM6A/ZNF277/HES2/TOX2/ETS2/NKX2-8/HSF2/NR4A1/HINFP/MED8/KDM6B/MUC1/NFIL3/HOXA5/TBPL1/ATF2/OVOL1/MYB/SP1/JDP2/ELK3/ARNTL/FOXK2/GATA2/GATA6/USF1/LMO2/SNAI3/KLF7/MEIS2/AEBP2/HES1/TWIST1/MEF2C/ARID3B/AGO1/HHEX/ELF1/ZNF202/HAND1/HOXB1/HMGA2/MYPOP/HOXA10/CIART/TBX3/DLX5/PAX8/HOXB7/KCNIP3/…	87	63	ENSG00000163435/ENSG00000123095/ENSG00000134107/ENSG00000072310/ENSG00000124813/ENSG00000137834/ENSG00000125347/ENSG00000166949/ENSG00000140455/ENSG00000179094/ENSG00000107485/ENSG00000078399/ENSG00000139083/ENSG00000147050/ENSG00000198839/ENSG00000124191/ENSG00000136327/ENSG00000025156/ENSG00000172273/ENSG00000159479/ENSG00000165030/ENSG00000106004/ENSG00000028839/ENSG00000115966/ENSG00000118513…	24	ENSG00000075624/ENSG00000057657/ENSG00000175592/ENSG00000125740/ENSG00000204103/ENSG00000136997/ENSG00000119508/ENSG00000069812/ENSG00000157557/ENSG00000123358/ENSG00000132510/ENSG00000185499/ENSG00000172818/ENSG00000092847/ENSG00000166261/ENSG00000149948/ENSG00000135111/ENSG00000105880/ENSG00000125618/ENSG00000115041/ENSG00000111087/ENSG00000179059/ENSG00000140009/ENSG00000183734
MF	GO:0043425	bHLH transcription factor binding	12/2288	26/14988	0.000184562	0.0260601	ENSG00000157514/ENSG00000123095/ENSG00000134107/ENSG00000124813/ENSG00000166949/ENSG00000185591/ENSG00000133794/ENSG00000158773/ENSG00000135363/ENSG00000122691/ENSG00000113196/ENSG00000123411	TSC22D3/BHLHE41/BHLHE40/RUNX2/SMAD3/SP1/ARNTL/USF1/LMO2/TWIST1/HAND1/IKZF4	12	12	ENSG00000157514/ENSG00000123095/ENSG00000134107/ENSG00000124813/ENSG00000166949/ENSG00000185591/ENSG00000133794/ENSG00000158773/ENSG00000135363/ENSG00000122691/ENSG00000113196/ENSG00000123411	0
MF	GO:0000987	proximal promoter sequence-specific DNA binding	89/2288	406/14988	0.000195024	0.0260601	ENSG00000163435/ENSG00000123095/ENSG00000134107/ENSG00000072310/ENSG00000124813/ENSG00000075624/ENSG00000057657/ENSG00000175592/ENSG00000137834/ENSG00000125347/ENSG00000125740/ENSG00000166949/ENSG00000204103/ENSG00000136997/ENSG00000140455/ENSG00000119508/ENSG00000179094/ENSG00000107485/ENSG00000078399/ENSG00000139083/ENSG00000147050/ENSG00000198839/ENSG00000069812/ENSG00000124191/ENSG00000157557…	ELF3/BHLHE41/BHLHE40/SREBF1/RUNX2/ACTB/PRDM1/FOSL1/SMAD6/IRF1/FOSB/SMAD3/MAFB/MYC/USP3/NR4A3/PER1/GATA3/HOXA9/ETV6/KDM6A/ZNF277/HES2/TOX2/ETS2/NKX2-8/HSF2/NR4A1/HINFP/MED8/KDM6B/MUC1/NFIL3/HOXA5/TBPL1/ATF2/OVOL1/MYB/SP1/JDP2/ZNF516/ELK3/ARNTL/FOXK2/GATA2/GATA6/KLF4/USF1/LMO2/SNAI3/KLF7/MEIS2/AEBP2/HES1/TWIST1/MEF2C/ARID3B/AGO1/HHEX/ELF1/ZNF202/HAND1/HOXB1/HMGA2/MYPOP/HOXA10/CIART/TBX3/DLX5/PAX8/H…	89	64	ENSG00000163435/ENSG00000123095/ENSG00000134107/ENSG00000072310/ENSG00000124813/ENSG00000137834/ENSG00000125347/ENSG00000166949/ENSG00000140455/ENSG00000179094/ENSG00000107485/ENSG00000078399/ENSG00000139083/ENSG00000147050/ENSG00000198839/ENSG00000124191/ENSG00000136327/ENSG00000025156/ENSG00000172273/ENSG00000159479/ENSG00000165030/ENSG00000106004/ENSG00000028839/ENSG00000115966/ENSG00000118513…	25	ENSG00000075624/ENSG00000057657/ENSG00000175592/ENSG00000125740/ENSG00000204103/ENSG00000136997/ENSG00000119508/ENSG00000069812/ENSG00000157557/ENSG00000123358/ENSG00000132510/ENSG00000185499/ENSG00000172818/ENSG00000136826/ENSG00000092847/ENSG00000166261/ENSG00000149948/ENSG00000135111/ENSG00000105880/ENSG00000125618/ENSG00000115041/ENSG00000111087/ENSG00000179059/ENSG00000140009/ENSG00000183734
MF	GO:0000982	transcription factor activity, RNA polymerase II proximal promoter sequence-specific DNA binding	83/2288	378/14988	0.000298135	0.0354119	ENSG00000163435/ENSG00000123095/ENSG00000105516/ENSG00000134107/ENSG00000072310/ENSG00000167074/ENSG00000124813/ENSG00000057657/ENSG00000175592/ENSG00000126603/ENSG00000125347/ENSG00000125740/ENSG00000204103/ENSG00000123364/ENSG00000136997/ENSG00000119508/ENSG00000107485/ENSG00000139083/ENSG00000019549/ENSG00000069812/ENSG00000124191/ENSG00000157557/ENSG00000136327/ENSG00000123358/ENSG00000172273…	ELF3/BHLHE41/DBP/BHLHE40/SREBF1/TEF/RUNX2/PRDM1/FOSL1/GLIS2/IRF1/FOSB/MAFB/HOXC13/MYC/NR4A3/GATA3/ETV6/SNAI2/HES2/TOX2/ETS2/NKX2-8/NR4A1/HINFP/NFIL3/HOXA5/TBPL1/ATF2/OVOL1/MYB/SP1/JDP2/ELK3/ARNTL/FOXK2/GATA2/KLF4/MEIS3/USF1/SNAI3/KLF7/MEIS2/FOXO1/FOXA1/AEBP2/HES1/MEF2C/IRF7/ARID3B/HHEX/ZNF750/ELF1/TSHZ3/ZNF202/HAND1/HOXB1/HMGA2/MYPOP/HOXA10/TBX3/DLX5/PAX8/HOXB7/KCNIP3/ZFP42/LHX2/SIX2/GFI1/MEIS1/A…	83	60	ENSG00000163435/ENSG00000123095/ENSG00000105516/ENSG00000134107/ENSG00000072310/ENSG00000167074/ENSG00000124813/ENSG00000126603/ENSG00000125347/ENSG00000123364/ENSG00000107485/ENSG00000139083/ENSG00000124191/ENSG00000136327/ENSG00000172273/ENSG00000165030/ENSG00000106004/ENSG00000028839/ENSG00000115966/ENSG00000118513/ENSG00000185591/ENSG00000140044/ENSG00000111145/ENSG00000133794/ENSG00000141568…	23	ENSG00000057657/ENSG00000175592/ENSG00000125740/ENSG00000204103/ENSG00000136997/ENSG00000119508/ENSG00000019549/ENSG00000069812/ENSG00000157557/ENSG00000123358/ENSG00000172818/ENSG00000136826/ENSG00000105419/ENSG00000185507/ENSG00000141579/ENSG00000166261/ENSG00000149948/ENSG00000135111/ENSG00000105880/ENSG00000125618/ENSG00000115041/ENSG00000179059/ENSG00000183734

## Sheet: VA vs M
Category	GOID	Description	GeneRatio	BgRatio	pvalue	padj	geneID	geneName	Count	Up	Up_Gene_names	Down	Down_Gene_names
BP	GO:0043588	skin development	87/1822	336/14946	3.1556e-12	1.7381e-08	ENSG00000167768/ENSG00000185479/ENSG00000124102/ENSG00000169469/ENSG00000203785/ENSG00000186832/ENSG00000203783/ENSG00000205420/ENSG00000163207/ENSG00000170465/ENSG00000135960/ENSG00000163216/ENSG00000186081/ENSG00000175793/ENSG00000244094/ENSG00000167767/ENSG00000092295/ENSG00000136943/ENSG00000186847/ENSG00000188910/ENSG00000171403/ENSG00000096696/ENSG00000241794/ENSG00000052344/ENSG00000185966…	KRT1/KRT6B/PI3/SPRR1B/SPRR2E/KRT16/PRR9/KRT6A/IVL/KRT6C/EDAR/SPRR2D/KRT5/SFN/SPRR2F/KRT80/TGM1/CTSV/KRT14/GJB3/KRT9/DSP/SPRR2A/PRSS8/LCE3E/SPRR4/FST/FLG/SCEL/KRT81/HOXC13/MET/TNF/TGFB2/KLK13/KRT3/ITGA6/INHBA/KRT17/FOXN1/RPTN/PKP2/PRKCH/LGR4/ITGA2/PDGFA/SPINK6/LCE3D/COL5A3/OVOL2/TXNIP/CASP14/DSC2/TGM5/KRT77/DSG1/SLC27A4/FOXE1/POU3F1/LCE1C/DSG4/EDA/KRTAP4-6/ALOX15B/KRTAP13-2/ATP8A2/LTB/TMEM79/KRTAP…	87	26	ENSG00000135960/ENSG00000167767/ENSG00000052344/ENSG00000136155/ENSG00000205426/ENSG00000123364/ENSG00000105976/ENSG00000092969/ENSG00000167759/ENSG00000057294/ENSG00000027075/ENSG00000205213/ENSG00000164171/ENSG00000125850/ENSG00000265972/ENSG00000104055/ENSG00000185668/ENSG00000158813/ENSG00000198090/ENSG00000132932/ENSG00000212901/ENSG00000106689/ENSG00000212900/ENSG00000221852/ENSG00000002745…	61	ENSG00000167768/ENSG00000185479/ENSG00000124102/ENSG00000169469/ENSG00000203785/ENSG00000186832/ENSG00000203783/ENSG00000205420/ENSG00000163207/ENSG00000170465/ENSG00000163216/ENSG00000186081/ENSG00000175793/ENSG00000244094/ENSG00000092295/ENSG00000136943/ENSG00000186847/ENSG00000188910/ENSG00000171403/ENSG00000096696/ENSG00000241794/ENSG00000185966/ENSG00000184148/ENSG00000134363/ENSG00000143631…
BP	GO:0031424	keratinization	51/1822	158/14946	2.19936e-11	6.05705e-08	ENSG00000167768/ENSG00000185479/ENSG00000124102/ENSG00000169469/ENSG00000203785/ENSG00000186832/ENSG00000205420/ENSG00000163207/ENSG00000170465/ENSG00000163216/ENSG00000186081/ENSG00000175793/ENSG00000244094/ENSG00000167767/ENSG00000092295/ENSG00000186847/ENSG00000171403/ENSG00000096696/ENSG00000241794/ENSG00000052344/ENSG00000185966/ENSG00000184148/ENSG00000143631/ENSG00000205426/ENSG00000167759…	KRT1/KRT6B/PI3/SPRR1B/SPRR2E/KRT16/KRT6A/IVL/KRT6C/SPRR2D/KRT5/SFN/SPRR2F/KRT80/TGM1/KRT14/KRT9/DSP/SPRR2A/PRSS8/LCE3E/SPRR4/FLG/KRT81/KLK13/KRT3/KRT17/RPTN/PKP2/SPINK6/LCE3D/CASP14/DSC2/TGM5/KRT77/DSG1/LCE1C/DSG4/KRTAP4-6/KRTAP13-2/TMEM79/KRTAP3-1/LCE3A/KRT36/LCE1F/KRT76/HRNR/KRTAP3-2/KRTAP1-5/KLK14/SPRR2B	51	10	ENSG00000167767/ENSG00000052344/ENSG00000205426/ENSG00000167759/ENSG00000057294/ENSG00000104055/ENSG00000198090/ENSG00000212901/ENSG00000212900/ENSG00000221852	41	ENSG00000167768/ENSG00000185479/ENSG00000124102/ENSG00000169469/ENSG00000203785/ENSG00000186832/ENSG00000205420/ENSG00000163207/ENSG00000170465/ENSG00000163216/ENSG00000186081/ENSG00000175793/ENSG00000244094/ENSG00000092295/ENSG00000186847/ENSG00000171403/ENSG00000096696/ENSG00000241794/ENSG00000185966/ENSG00000184148/ENSG00000143631/ENSG00000186442/ENSG00000128422/ENSG00000215853/ENSG00000178172…
BP	GO:0070268	cornification	39/1822	105/14946	4.3317e-11	7.953e-08	ENSG00000167768/ENSG00000185479/ENSG00000124102/ENSG00000169469/ENSG00000203785/ENSG00000186832/ENSG00000205420/ENSG00000163207/ENSG00000170465/ENSG00000163216/ENSG00000186081/ENSG00000244094/ENSG00000167767/ENSG00000092295/ENSG00000186847/ENSG00000171403/ENSG00000096696/ENSG00000241794/ENSG00000052344/ENSG00000143631/ENSG00000205426/ENSG00000167759/ENSG00000186442/ENSG00000128422/ENSG00000215853…	KRT1/KRT6B/PI3/SPRR1B/SPRR2E/KRT16/KRT6A/IVL/KRT6C/SPRR2D/KRT5/SPRR2F/KRT80/TGM1/KRT14/KRT9/DSP/SPRR2A/PRSS8/FLG/KRT81/KLK13/KRT3/KRT17/RPTN/PKP2/SPINK6/LCE3D/CASP14/DSC2/TGM5/KRT77/DSG1/DSG4/TMEM79/KRT36/KRT76/KLK14/SPRR2B	39	6	ENSG00000167767/ENSG00000052344/ENSG00000205426/ENSG00000167759/ENSG00000057294/ENSG00000104055	33	ENSG00000167768/ENSG00000185479/ENSG00000124102/ENSG00000169469/ENSG00000203785/ENSG00000186832/ENSG00000205420/ENSG00000163207/ENSG00000170465/ENSG00000163216/ENSG00000186081/ENSG00000244094/ENSG00000092295/ENSG00000186847/ENSG00000171403/ENSG00000096696/ENSG00000241794/ENSG00000143631/ENSG00000186442/ENSG00000128422/ENSG00000215853/ENSG00000178172/ENSG00000163202/ENSG00000105141/ENSG00000134755…
BP	GO:0030216	keratinocyte differentiation	63/1822	231/14946	3.27712e-10	4.5126e-07	ENSG00000167768/ENSG00000185479/ENSG00000124102/ENSG00000169469/ENSG00000203785/ENSG00000186832/ENSG00000203783/ENSG00000205420/ENSG00000163207/ENSG00000170465/ENSG00000163216/ENSG00000186081/ENSG00000175793/ENSG00000244094/ENSG00000167767/ENSG00000092295/ENSG00000136943/ENSG00000186847/ENSG00000171403/ENSG00000096696/ENSG00000241794/ENSG00000052344/ENSG00000185966/ENSG00000184148/ENSG00000143631…	KRT1/KRT6B/PI3/SPRR1B/SPRR2E/KRT16/PRR9/KRT6A/IVL/KRT6C/SPRR2D/KRT5/SFN/SPRR2F/KRT80/TGM1/CTSV/KRT14/KRT9/DSP/SPRR2A/PRSS8/LCE3E/SPRR4/FLG/SCEL/KRT81/KLK13/KRT3/KRT17/FOXN1/RPTN/PKP2/PRKCH/SPINK6/LCE3D/OVOL2/TXNIP/CASP14/DSC2/TGM5/KRT77/DSG1/POU3F1/LCE1C/DSG4/KRTAP4-6/ALOX15B/KRTAP13-2/TMEM79/KRTAP3-1/LCE3A/KRT36/LCE1F/KRT76/IL20/HRNR/KRTAP3-2/KRTAP1-5/DNASE1L2/WNT16/KLK14/SPRR2B	63	16	ENSG00000167767/ENSG00000052344/ENSG00000136155/ENSG00000205426/ENSG00000167759/ENSG00000057294/ENSG00000027075/ENSG00000125850/ENSG00000265972/ENSG00000104055/ENSG00000185668/ENSG00000198090/ENSG00000212901/ENSG00000212900/ENSG00000221852/ENSG00000002745	47	ENSG00000167768/ENSG00000185479/ENSG00000124102/ENSG00000169469/ENSG00000203785/ENSG00000186832/ENSG00000203783/ENSG00000205420/ENSG00000163207/ENSG00000170465/ENSG00000163216/ENSG00000186081/ENSG00000175793/ENSG00000244094/ENSG00000092295/ENSG00000136943/ENSG00000186847/ENSG00000171403/ENSG00000096696/ENSG00000241794/ENSG00000185966/ENSG00000184148/ENSG00000143631/ENSG00000186442/ENSG00000128422…
BP	GO:0018149	peptide cross-linking	23/1822	49/14946	2.03455e-09	2.24126e-06	ENSG00000167768/ENSG00000124102/ENSG00000169469/ENSG00000203785/ENSG00000203783/ENSG00000163207/ENSG00000163216/ENSG00000244094/ENSG00000092295/ENSG00000096696/ENSG00000241794/ENSG00000185966/ENSG00000184148/ENSG00000143631/ENSG00000198959/ENSG00000163202/ENSG00000104055/ENSG00000197084/ENSG00000137801/ENSG00000185962/ENSG00000240386/ENSG00000182492/ENSG00000196805	KRT1/PI3/SPRR1B/SPRR2E/PRR9/IVL/SPRR2D/SPRR2F/TGM1/DSP/SPRR2A/LCE3E/SPRR4/FLG/TGM2/LCE3D/TGM5/LCE1C/THBS1/LCE3A/LCE1F/BGN/SPRR2B	23	1	ENSG00000104055	22	ENSG00000167768/ENSG00000124102/ENSG00000169469/ENSG00000203785/ENSG00000203783/ENSG00000163207/ENSG00000163216/ENSG00000244094/ENSG00000092295/ENSG00000096696/ENSG00000241794/ENSG00000185966/ENSG00000184148/ENSG00000143631/ENSG00000198959/ENSG00000163202/ENSG00000197084/ENSG00000137801/ENSG00000185962/ENSG00000240386/ENSG00000182492/ENSG00000196805
BP	GO:0008544	epidermis development	87/1822	380/14946	2.81679e-09	2.58582e-06	ENSG00000167768/ENSG00000185479/ENSG00000087494/ENSG00000124102/ENSG00000169469/ENSG00000163435/ENSG00000203785/ENSG00000186832/ENSG00000203783/ENSG00000205420/ENSG00000163207/ENSG00000170465/ENSG00000135960/ENSG00000163216/ENSG00000186081/ENSG00000134531/ENSG00000175793/ENSG00000244094/ENSG00000167767/ENSG00000092295/ENSG00000136943/ENSG00000186847/ENSG00000189280/ENSG00000148154/ENSG00000171403…	KRT1/KRT6B/PTHLH/PI3/SPRR1B/ELF3/SPRR2E/KRT16/PRR9/KRT6A/IVL/KRT6C/EDAR/SPRR2D/KRT5/EMP1/SFN/SPRR2F/KRT80/TGM1/CTSV/KRT14/GJB5/UGCG/KRT9/DSP/COL7A1/SPRR2A/PRSS8/LCE3E/SPRR4/FST/FLG/SCEL/KRT81/HOXC13/MAFF/TNF/TGFB2/KLK13/KRT3/INHBA/KRT17/FOXN1/RPTN/PKP2/PRKCH/LGR4/PDGFA/SPINK6/LCE3D/OVOL2/TXNIP/CASP14/SEC24B/DSC2/TGM5/KRT77/DSG1/FOXE1/POU3F1/LCE1C/DSG4/EDA/KRTAP4-6/ALOX15B/CALML5/KRTAP13-2/HEY2/TM…	87	28	ENSG00000163435/ENSG00000135960/ENSG00000134531/ENSG00000167767/ENSG00000148154/ENSG00000052344/ENSG00000136155/ENSG00000205426/ENSG00000123364/ENSG00000185022/ENSG00000092969/ENSG00000167759/ENSG00000057294/ENSG00000027075/ENSG00000205213/ENSG00000125850/ENSG00000265972/ENSG00000138802/ENSG00000104055/ENSG00000185668/ENSG00000158813/ENSG00000198090/ENSG00000135547/ENSG00000212901/ENSG00000106689…	59	ENSG00000167768/ENSG00000185479/ENSG00000087494/ENSG00000124102/ENSG00000169469/ENSG00000203785/ENSG00000186832/ENSG00000203783/ENSG00000205420/ENSG00000163207/ENSG00000170465/ENSG00000163216/ENSG00000186081/ENSG00000175793/ENSG00000244094/ENSG00000092295/ENSG00000136943/ENSG00000186847/ENSG00000189280/ENSG00000171403/ENSG00000096696/ENSG00000114270/ENSG00000241794/ENSG00000185966/ENSG00000184148…
BP	GO:0009913	epidermal cell differentiation	66/1822	280/14946	7.23009e-08	5.68905e-05	ENSG00000167768/ENSG00000185479/ENSG00000124102/ENSG00000169469/ENSG00000203785/ENSG00000186832/ENSG00000203783/ENSG00000205420/ENSG00000163207/ENSG00000170465/ENSG00000163216/ENSG00000186081/ENSG00000175793/ENSG00000244094/ENSG00000167767/ENSG00000092295/ENSG00000136943/ENSG00000186847/ENSG00000171403/ENSG00000096696/ENSG00000241794/ENSG00000052344/ENSG00000185966/ENSG00000184148/ENSG00000143631…	KRT1/KRT6B/PI3/SPRR1B/SPRR2E/KRT16/PRR9/KRT6A/IVL/KRT6C/SPRR2D/KRT5/SFN/SPRR2F/KRT80/TGM1/CTSV/KRT14/KRT9/DSP/SPRR2A/PRSS8/LCE3E/SPRR4/FLG/SCEL/KRT81/MAFF/KLK13/KRT3/KRT17/FOXN1/RPTN/PKP2/PRKCH/SPINK6/LCE3D/OVOL2/TXNIP/CASP14/SEC24B/DSC2/TGM5/KRT77/DSG1/POU3F1/LCE1C/DSG4/KRTAP4-6/ALOX15B/KRTAP13-2/HEY2/TMEM79/KRTAP3-1/LCE3A/KRT36/LCE1F/KRT76/IL20/HRNR/KRTAP3-2/KRTAP1-5/DNASE1L2/WNT16/KLK14/SPRR2B	66	19	ENSG00000167767/ENSG00000052344/ENSG00000136155/ENSG00000205426/ENSG00000185022/ENSG00000167759/ENSG00000057294/ENSG00000027075/ENSG00000125850/ENSG00000265972/ENSG00000138802/ENSG00000104055/ENSG00000185668/ENSG00000198090/ENSG00000135547/ENSG00000212901/ENSG00000212900/ENSG00000221852/ENSG00000002745	47	ENSG00000167768/ENSG00000185479/ENSG00000124102/ENSG00000169469/ENSG00000203785/ENSG00000186832/ENSG00000203783/ENSG00000205420/ENSG00000163207/ENSG00000170465/ENSG00000163216/ENSG00000186081/ENSG00000175793/ENSG00000244094/ENSG00000092295/ENSG00000136943/ENSG00000186847/ENSG00000171403/ENSG00000096696/ENSG00000241794/ENSG00000185966/ENSG00000184148/ENSG00000143631/ENSG00000186442/ENSG00000128422…
BP	GO:0010469	regulation of signaling receptor activity	82/1822	423/14946	1.14126e-05	0.00785756	ENSG00000087494/ENSG00000125657/ENSG00000114796/ENSG00000121858/ENSG00000125726/ENSG00000158458/ENSG00000184502/ENSG00000105835/ENSG00000188064/ENSG00000196730/ENSG00000171862/ENSG00000169174/ENSG00000110492/ENSG00000006606/ENSG00000150551/ENSG00000130513/ENSG00000120899/ENSG00000170293/ENSG00000164136/ENSG00000232810/ENSG00000092969/ENSG00000196937/ENSG00000136999/ENSG00000091317/ENSG00000122641…	PTHLH/TNFSF9/KLHL24/TNFSF10/CD70/NRG2/GAST/NAMPT/WNT7B/DAPK1/PTEN/PCSK9/MDK/CCL26/LYPD1/GDF15/PTK2B/CMTM8/IL15/TNF/TGFB2/FAM3C/NOV/CMTM6/INHBA/TNFRSF11B/LYNX1/CSF1/STC2/PDGFA/C10orf99/IL36G/IL23A/CXCL1/CCL20/NRP1/HDGFL3/IL36RN/IL6/CACNG8/TXLNA/LYNX1-SLURP2/CHMP6/NRG4/ARC/AREG/PRKCE/BMP3/OSGIN2/AMH/IFNE/PDGFD/LTB/IL16/SLURP2/CGB7/PTN/EDN1/LHB/NGF/ADM2/CXCL14/C1QTNF12/PPARGC1A/IL17C/PSPN/DKK1/IL7/C…	82	42	ENSG00000125657/ENSG00000114796/ENSG00000121858/ENSG00000125726/ENSG00000158458/ENSG00000105835/ENSG00000188064/ENSG00000196730/ENSG00000171862/ENSG00000169174/ENSG00000110492/ENSG00000006606/ENSG00000150551/ENSG00000130513/ENSG00000120899/ENSG00000170293/ENSG00000164136/ENSG00000092969/ENSG00000196937/ENSG00000091317/ENSG00000184371/ENSG00000110944/ENSG00000099250/ENSG00000166503/ENSG00000284505…	40	ENSG00000087494/ENSG00000184502/ENSG00000232810/ENSG00000136999/ENSG00000122641/ENSG00000164761/ENSG00000180155/ENSG00000113739/ENSG00000197461/ENSG00000188373/ENSG00000136688/ENSG00000163739/ENSG00000115009/ENSG00000136695/ENSG00000136244/ENSG00000142408/ENSG00000084652/ENSG00000176108/ENSG00000109321/ENSG00000104899/ENSG00000184995/ENSG00000227507/ENSG00000172349/ENSG00000283992/ENSG00000078401…
BP	GO:0006694	steroid biosynthetic process	39/1822	166/14946	3.52605e-05	0.0197493	ENSG00000052802/ENSG00000112972/ENSG00000006025/ENSG00000186480/ENSG00000079459/ENSG00000109929/ENSG00000072310/ENSG00000164211/ENSG00000172893/ENSG00000132341/ENSG00000113161/ENSG00000169710/ENSG00000133935/ENSG00000067064/ENSG00000167508/ENSG00000001630/ENSG00000131473/ENSG00000140459/ENSG00000110921/ENSG00000232810/ENSG00000143815/ENSG00000126368/ENSG00000117859/ENSG00000010270/ENSG00000132196…	MSMO1/HMGCS1/OSBPL7/INSIG1/FDFT1/SC5D/SREBF1/STARD4/DHCR7/RAN/HMGCR/FASN/ERG28/IDI1/MVD/CYP51A1/ACLY/CYP11A1/MVK/TNF/LBR/NR1D1/OSBPL9/STARD3NL/HSD17B7/SQLE/HSD17B12/CH25H/LHB/PPARGC1A/CYB5R2/TFCP2L1/SDR42E1/HSD11B1/HSD17B11/FAXDC2/FGF19/HINT2/PROX1	39	33	ENSG00000052802/ENSG00000112972/ENSG00000006025/ENSG00000186480/ENSG00000079459/ENSG00000109929/ENSG00000072310/ENSG00000164211/ENSG00000172893/ENSG00000113161/ENSG00000169710/ENSG00000133935/ENSG00000067064/ENSG00000167508/ENSG00000001630/ENSG00000131473/ENSG00000140459/ENSG00000110921/ENSG00000143815/ENSG00000117859/ENSG00000010270/ENSG00000132196/ENSG00000104549/ENSG00000149084/ENSG00000138135…	6	ENSG00000132341/ENSG00000232810/ENSG00000126368/ENSG00000166394/ENSG00000115112/ENSG00000184860
BP	GO:0016126	sterol biosynthetic process	22/1822	73/14946	3.58557e-05	0.0197493	ENSG00000052802/ENSG00000112972/ENSG00000186480/ENSG00000079459/ENSG00000109929/ENSG00000072310/ENSG00000172893/ENSG00000132341/ENSG00000113161/ENSG00000169710/ENSG00000133935/ENSG00000067064/ENSG00000167508/ENSG00000001630/ENSG00000131473/ENSG00000110921/ENSG00000143815/ENSG00000132196/ENSG00000104549/ENSG00000138135/ENSG00000166394/ENSG00000170271	MSMO1/HMGCS1/INSIG1/FDFT1/SC5D/SREBF1/DHCR7/RAN/HMGCR/FASN/ERG28/IDI1/MVD/CYP51A1/ACLY/MVK/LBR/HSD17B7/SQLE/CH25H/CYB5R2/FAXDC2	22	20	ENSG00000052802/ENSG00000112972/ENSG00000186480/ENSG00000079459/ENSG00000109929/ENSG00000072310/ENSG00000172893/ENSG00000113161/ENSG00000169710/ENSG00000133935/ENSG00000067064/ENSG00000167508/ENSG00000001630/ENSG00000131473/ENSG00000110921/ENSG00000143815/ENSG00000132196/ENSG00000104549/ENSG00000138135/ENSG00000170271	2	ENSG00000132341/ENSG00000166394
BP	GO:0046890	regulation of lipid biosynthetic process	36/1822	150/14946	4.30299e-05	0.0215462	ENSG00000112972/ENSG00000186480/ENSG00000012660/ENSG00000123983/ENSG00000165175/ENSG00000079459/ENSG00000109929/ENSG00000156671/ENSG00000072310/ENSG00000164211/ENSG00000172893/ENSG00000132341/ENSG00000113161/ENSG00000169710/ENSG00000067064/ENSG00000167508/ENSG00000001630/ENSG00000123353/ENSG00000110921/ENSG00000232810/ENSG00000138413/ENSG00000126368/ENSG00000197461/ENSG00000125730/ENSG00000104549…	HMGCS1/INSIG1/ELOVL5/ACSL3/MID1IP1/FDFT1/SC5D/SAMD8/SREBF1/STARD4/DHCR7/RAN/HMGCR/FASN/IDI1/MVD/CYP51A1/ORMDL2/MVK/TNF/IDH1/NR1D1/PDGFA/C3/SQLE/CYR61/CCDC3/PDK4/PLIN5/PPARGC1A/GPER1/SMPD3/PTGS2/FGF19/SORBS1/PROX1	36	26	ENSG00000112972/ENSG00000186480/ENSG00000012660/ENSG00000123983/ENSG00000165175/ENSG00000079459/ENSG00000109929/ENSG00000156671/ENSG00000072310/ENSG00000164211/ENSG00000172893/ENSG00000113161/ENSG00000169710/ENSG00000067064/ENSG00000167508/ENSG00000001630/ENSG00000110921/ENSG00000138413/ENSG00000125730/ENSG00000104549/ENSG00000004799/ENSG00000214456/ENSG00000109819/ENSG00000162344/ENSG00000095637…	10	ENSG00000132341/ENSG00000123353/ENSG00000232810/ENSG00000126368/ENSG00000197461/ENSG00000142871/ENSG00000151468/ENSG00000164850/ENSG00000103056/ENSG00000073756
CC	GO:0001533	cornified envelope	26/1913	57/15747	3.70953e-10	2.27765e-07	ENSG00000167768/ENSG00000124102/ENSG00000169469/ENSG00000203785/ENSG00000203783/ENSG00000163207/ENSG00000163216/ENSG00000244094/ENSG00000092295/ENSG00000096696/ENSG00000241794/ENSG00000185966/ENSG00000184148/ENSG00000143631/ENSG00000136155/ENSG00000215853/ENSG00000057294/ENSG00000163202/ENSG00000134755/ENSG00000134760/ENSG00000197084/ENSG00000175065/ENSG00000185962/ENSG00000240386/ENSG00000197915…	KRT1/PI3/SPRR1B/SPRR2E/PRR9/IVL/SPRR2D/SPRR2F/TGM1/DSP/SPRR2A/LCE3E/SPRR4/FLG/SCEL/RPTN/PKP2/LCE3D/DSC2/DSG1/LCE1C/DSG4/LCE3A/LCE1F/HRNR/SPRR2B	26	2	ENSG00000136155/ENSG00000057294	24	ENSG00000167768/ENSG00000124102/ENSG00000169469/ENSG00000203785/ENSG00000203783/ENSG00000163207/ENSG00000163216/ENSG00000244094/ENSG00000092295/ENSG00000096696/ENSG00000241794/ENSG00000185966/ENSG00000184148/ENSG00000143631/ENSG00000215853/ENSG00000163202/ENSG00000134755/ENSG00000134760/ENSG00000197084/ENSG00000175065/ENSG00000185962/ENSG00000240386/ENSG00000197915/ENSG00000196805
CC	GO:0031012	extracellular matrix	76/1913	412/15747	0.000117543	0.0360856	ENSG00000167768/ENSG00000124102/ENSG00000142910/ENSG00000185585/ENSG00000166670/ENSG00000091986/ENSG00000021355/ENSG00000196611/ENSG00000149968/ENSG00000166833/ENSG00000168056/ENSG00000124107/ENSG00000140511/ENSG00000188064/ENSG00000114270/ENSG00000143369/ENSG00000134013/ENSG00000099783/ENSG00000159674/ENSG00000105825/ENSG00000092969/ENSG00000106278/ENSG00000136999/ENSG00000091409/ENSG00000138829…	KRT1/PI3/TINAGL1/OLFML2A/MMP10/CCDC80/SERPINB1/MMP1/MMP3/NAV2/LTBP3/SLPI/HAPLN3/WNT7B/COL7A1/ECM1/LOXL2/HNRNPM/SPON2/TFPI2/TGFB2/PTPRZ1/NOV/ITGA6/FBN2/TGM2/TNFRSF11B/ADAMTSL5/RPTN/WNT5B/HMCN2/ERBIN/COL5A3/CSPG4/NTN4/HSD17B12/CYR61/L1CAM/MMP13/PODNL1/SERPINF1/F3/COL2A1/ICAM1/PCOLCE/MMP9/HMCN1/MMP12/THBS1/FLRT3/HTRA1/MFAP5/MAMDC2/FLRT2/NPNT/PTN/SLIT1/LAMA4/ADAMTS15/ADAMTS14/BGN/COL4A4/SPON1/MMP25/L…	76	34	ENSG00000142910/ENSG00000091986/ENSG00000021355/ENSG00000166833/ENSG00000168056/ENSG00000140511/ENSG00000188064/ENSG00000134013/ENSG00000105825/ENSG00000092969/ENSG00000111186/ENSG00000148357/ENSG00000112851/ENSG00000074527/ENSG00000149084/ENSG00000137745/ENSG00000132386/ENSG00000139219/ENSG00000090339/ENSG00000106333/ENSG00000262406/ENSG00000165072/ENSG00000168743/ENSG00000105894/ENSG00000187122…	42	ENSG00000167768/ENSG00000124102/ENSG00000185585/ENSG00000166670/ENSG00000196611/ENSG00000149968/ENSG00000124107/ENSG00000114270/ENSG00000143369/ENSG00000099783/ENSG00000159674/ENSG00000106278/ENSG00000136999/ENSG00000091409/ENSG00000138829/ENSG00000198959/ENSG00000164761/ENSG00000185761/ENSG00000215853/ENSG00000080573/ENSG00000173546/ENSG00000142871/ENSG00000198910/ENSG00000132000/ENSG00000117525…
MF	GO:0030545	receptor regulator activity	81/1851	383/14974	6.59768e-07	0.000670984	ENSG00000087494/ENSG00000125657/ENSG00000121858/ENSG00000125726/ENSG00000158458/ENSG00000184502/ENSG00000105835/ENSG00000188064/ENSG00000164104/ENSG00000169174/ENSG00000110492/ENSG00000006606/ENSG00000150551/ENSG00000130513/ENSG00000170293/ENSG00000164136/ENSG00000232810/ENSG00000092969/ENSG00000196937/ENSG00000136999/ENSG00000091317/ENSG00000122641/ENSG00000164761/ENSG00000180155/ENSG00000184371…	PTHLH/TNFSF9/TNFSF10/CD70/NRG2/GAST/NAMPT/WNT7B/HMGB2/PCSK9/MDK/CCL26/LYPD1/GDF15/CMTM8/IL15/TNF/TGFB2/FAM3C/NOV/CMTM6/INHBA/TNFRSF11B/LYNX1/CSF1/STC2/PDGFA/C10orf99/IL36G/IL23A/CXCL1/CCL20/HDGFL3/IL36RN/IL6/TXLNA/LYNX1-SLURP2/SAA2/NRG4/SEMA3A/AREG/PRKCE/BMP3/OSGIN2/ADH7/AMH/IFNE/FLRT3/PDGFD/LTB/IL16/SLURP2/CGB7/FLRT2/PTN/EDN1/LHB/NGF/ADM2/CXCL14/C1QTNF12/IL17C/PSPN/DKK1/IL7/DEFB4A/IL1F10/IL20/CC…	81	40	ENSG00000125657/ENSG00000121858/ENSG00000125726/ENSG00000158458/ENSG00000105835/ENSG00000188064/ENSG00000164104/ENSG00000169174/ENSG00000110492/ENSG00000006606/ENSG00000150551/ENSG00000130513/ENSG00000170293/ENSG00000164136/ENSG00000092969/ENSG00000196937/ENSG00000091317/ENSG00000184371/ENSG00000110944/ENSG00000166503/ENSG00000284505/ENSG00000134339/ENSG00000169752/ENSG00000075213/ENSG00000171132…	41	ENSG00000087494/ENSG00000184502/ENSG00000232810/ENSG00000136999/ENSG00000122641/ENSG00000164761/ENSG00000180155/ENSG00000113739/ENSG00000197461/ENSG00000188373/ENSG00000136688/ENSG00000163739/ENSG00000115009/ENSG00000136695/ENSG00000136244/ENSG00000084652/ENSG00000109321/ENSG00000196344/ENSG00000104899/ENSG00000184995/ENSG00000125848/ENSG00000227507/ENSG00000172349/ENSG00000283992/ENSG00000185070…
MF	GO:0048018	receptor ligand activity	73/1851	357/14974	8.2485e-06	0.00419436	ENSG00000087494/ENSG00000125657/ENSG00000121858/ENSG00000125726/ENSG00000158458/ENSG00000184502/ENSG00000105835/ENSG00000188064/ENSG00000164104/ENSG00000110492/ENSG00000006606/ENSG00000130513/ENSG00000170293/ENSG00000164136/ENSG00000232810/ENSG00000092969/ENSG00000196937/ENSG00000136999/ENSG00000091317/ENSG00000122641/ENSG00000164761/ENSG00000184371/ENSG00000113739/ENSG00000197461/ENSG00000188373…	PTHLH/TNFSF9/TNFSF10/CD70/NRG2/GAST/NAMPT/WNT7B/HMGB2/MDK/CCL26/GDF15/CMTM8/IL15/TNF/TGFB2/FAM3C/NOV/CMTM6/INHBA/TNFRSF11B/CSF1/STC2/PDGFA/C10orf99/IL36G/IL23A/CXCL1/CCL20/HDGFL3/IL36RN/IL6/TXLNA/SAA2/NRG4/SEMA3A/AREG/BMP3/OSGIN2/AMH/IFNE/FLRT3/PDGFD/LTB/IL16/CGB7/FLRT2/PTN/EDN1/LHB/NGF/ADM2/CXCL14/C1QTNF12/IL17C/PSPN/DKK1/IL7/DEFB4A/IL1F10/IL20/CCL4L2/CSF3/CKLF/UCN2/SAA4/PYY/IFNL1/APLN/FGF19/ADA…	73	36	ENSG00000125657/ENSG00000121858/ENSG00000125726/ENSG00000158458/ENSG00000105835/ENSG00000188064/ENSG00000164104/ENSG00000110492/ENSG00000006606/ENSG00000130513/ENSG00000170293/ENSG00000164136/ENSG00000092969/ENSG00000196937/ENSG00000091317/ENSG00000184371/ENSG00000110944/ENSG00000166503/ENSG00000134339/ENSG00000169752/ENSG00000075213/ENSG00000152785/ENSG00000164823/ENSG00000170962/ENSG00000196337…	37	ENSG00000087494/ENSG00000184502/ENSG00000232810/ENSG00000136999/ENSG00000122641/ENSG00000164761/ENSG00000113739/ENSG00000197461/ENSG00000188373/ENSG00000136688/ENSG00000163739/ENSG00000115009/ENSG00000136695/ENSG00000136244/ENSG00000084652/ENSG00000109321/ENSG00000104899/ENSG00000184995/ENSG00000125848/ENSG00000227507/ENSG00000172349/ENSG00000185070/ENSG00000078401/ENSG00000134259/ENSG00000128165…
MF	GO:0005200	structural constituent of cytoskeleton	27/1851	102/14974	8.15445e-05	0.0276436	ENSG00000185479/ENSG00000167553/ENSG00000186832/ENSG00000123416/ENSG00000186081/ENSG00000188229/ENSG00000186847/ENSG00000127824/ENSG00000171403/ENSG00000096696/ENSG00000176014/ENSG00000137267/ENSG00000173898/ENSG00000131462/ENSG00000159023/ENSG00000128422/ENSG00000137285/ENSG00000075624/ENSG00000112851/ENSG00000171914/ENSG00000127337/ENSG00000148700/ENSG00000167552/ENSG00000198947/ENSG00000243910…	KRT6B/TUBA1C/KRT16/TUBA1B/KRT5/TUBB4B/KRT14/TUBA4A/KRT9/DSP/TUBB6/TUBB2A/SPTBN2/TUBG1/EPB41/KRT17/TUBB2B/ACTB/ERBIN/TLN2/YEATS4/ADD3/TUBA1A/DMD/TUBA4B/ACTA1/FRMD3	27	6	ENSG00000159023/ENSG00000112851/ENSG00000127337/ENSG00000148700/ENSG00000198947/ENSG00000172159	21	ENSG00000185479/ENSG00000167553/ENSG00000186832/ENSG00000123416/ENSG00000186081/ENSG00000188229/ENSG00000186847/ENSG00000127824/ENSG00000171403/ENSG00000096696/ENSG00000176014/ENSG00000137267/ENSG00000173898/ENSG00000131462/ENSG00000128422/ENSG00000137285/ENSG00000075624/ENSG00000171914/ENSG00000167552/ENSG00000243910/ENSG00000143632
MF	GO:0005125	cytokine activity	39/1851	174/14974	0.000142084	0.0361248	ENSG00000125657/ENSG00000121858/ENSG00000125726/ENSG00000105835/ENSG00000006606/ENSG00000130513/ENSG00000170293/ENSG00000164136/ENSG00000232810/ENSG00000092969/ENSG00000196937/ENSG00000091317/ENSG00000122641/ENSG00000164761/ENSG00000184371/ENSG00000188373/ENSG00000136688/ENSG00000110944/ENSG00000163739/ENSG00000115009/ENSG00000136695/ENSG00000136244/ENSG00000084652/ENSG00000109321/ENSG00000152785…	TNFSF9/TNFSF10/CD70/NAMPT/CCL26/GDF15/CMTM8/IL15/TNF/TGFB2/FAM3C/CMTM6/INHBA/TNFRSF11B/CSF1/C10orf99/IL36G/IL23A/CXCL1/CCL20/IL36RN/IL6/TXLNA/AREG/BMP3/IFNE/LTB/IL16/EDN1/CXCL14/IL17C/IL7/IL1F10/IL20/CCL4L2/CSF3/CKLF/IFNL1/IFNK	39	16	ENSG00000125657/ENSG00000121858/ENSG00000125726/ENSG00000105835/ENSG00000006606/ENSG00000130513/ENSG00000170293/ENSG00000164136/ENSG00000092969/ENSG00000196937/ENSG00000091317/ENSG00000184371/ENSG00000110944/ENSG00000152785/ENSG00000104432/ENSG00000217555	23	ENSG00000232810/ENSG00000122641/ENSG00000164761/ENSG00000188373/ENSG00000136688/ENSG00000163739/ENSG00000115009/ENSG00000136695/ENSG00000136244/ENSG00000084652/ENSG00000109321/ENSG00000184995/ENSG00000227507/ENSG00000172349/ENSG00000078401/ENSG00000145824/ENSG00000124391/ENSG00000136697/ENSG00000162891/ENSG00000276070/ENSG00000108342/ENSG00000182393/ENSG00000147896

## Sheet: FA vs M
Supplementary Table 9. Enrichment analysis by comparing the genes of each group with the photoaging HaCaT cell.
Category	GOID	Description	GeneRatio	BgRatio	pvalue	padj	geneID	geneName	Count	Up	Up_Gene_names	Down	Down_Gene_names
BP	GO:0016126	sterol biosynthetic process	17/216	74/14673	4.1616e-16	1.11697e-12	ENSG00000186480/ENSG00000052802/ENSG00000067064/ENSG00000169710/ENSG00000109929/ENSG00000167508/ENSG00000112972/ENSG00000113161/ENSG00000160752/ENSG00000172893/ENSG00000079459/ENSG00000133935/ENSG00000104549/ENSG00000138135/ENSG00000132196/ENSG00000110921/ENSG00000072310	INSIG1/MSMO1/IDI1/FASN/SC5D/MVD/HMGCS1/HMGCR/FDPS/DHCR7/FDFT1/ERG28/SQLE/CH25H/HSD17B7/MVK/SREBF1	17	17	ENSG00000186480/ENSG00000052802/ENSG00000067064/ENSG00000169710/ENSG00000109929/ENSG00000167508/ENSG00000112972/ENSG00000113161/ENSG00000160752/ENSG00000172893/ENSG00000079459/ENSG00000133935/ENSG00000104549/ENSG00000138135/ENSG00000132196/ENSG00000110921/ENSG00000072310	0
BP	GO:1902653	secondary alcohol biosynthetic process	16/216	69/14673	2.67515e-15	3.59005e-12	ENSG00000186480/ENSG00000052802/ENSG00000067064/ENSG00000169710/ENSG00000109929/ENSG00000167508/ENSG00000112972/ENSG00000113161/ENSG00000160752/ENSG00000172893/ENSG00000079459/ENSG00000133935/ENSG00000104549/ENSG00000132196/ENSG00000110921/ENSG00000072310	INSIG1/MSMO1/IDI1/FASN/SC5D/MVD/HMGCS1/HMGCR/FDPS/DHCR7/FDFT1/ERG28/SQLE/HSD17B7/MVK/SREBF1	16	16	ENSG00000186480/ENSG00000052802/ENSG00000067064/ENSG00000169710/ENSG00000109929/ENSG00000167508/ENSG00000112972/ENSG00000113161/ENSG00000160752/ENSG00000172893/ENSG00000079459/ENSG00000133935/ENSG00000104549/ENSG00000132196/ENSG00000110921/ENSG00000072310	0
BP	GO:0008202	steroid metabolic process	26/216	269/14673	2.43636e-14	2.17973e-11	ENSG00000186480/ENSG00000140465/ENSG00000052802/ENSG00000067064/ENSG00000169710/ENSG00000109929/ENSG00000167508/ENSG00000019186/ENSG00000164211/ENSG00000112972/ENSG00000113161/ENSG00000160752/ENSG00000172893/ENSG00000163659/ENSG00000169174/ENSG00000069667/ENSG00000079459/ENSG00000140459/ENSG00000133935/ENSG00000104549/ENSG00000138135/ENSG00000132196/ENSG00000006025/ENSG00000110921/ENSG00000072310…	INSIG1/CYP1A1/MSMO1/IDI1/FASN/SC5D/MVD/CYP24A1/STARD4/HMGCS1/HMGCR/FDPS/DHCR7/TIPARP/PCSK9/RORA/FDFT1/CYP11A1/ERG28/SQLE/CH25H/HSD17B7/OSBPL7/MVK/SREBF1/TFCP2L1	26	25	ENSG00000186480/ENSG00000140465/ENSG00000052802/ENSG00000067064/ENSG00000169710/ENSG00000109929/ENSG00000167508/ENSG00000019186/ENSG00000164211/ENSG00000112972/ENSG00000113161/ENSG00000160752/ENSG00000172893/ENSG00000163659/ENSG00000169174/ENSG00000069667/ENSG00000079459/ENSG00000140459/ENSG00000133935/ENSG00000104549/ENSG00000138135/ENSG00000132196/ENSG00000006025/ENSG00000110921/ENSG00000072310	1	ENSG00000115112
BP	GO:0006695	cholesterol biosynthetic process	15/216	67/14673	3.56973e-14	2.28828e-11	ENSG00000186480/ENSG00000052802/ENSG00000067064/ENSG00000169710/ENSG00000109929/ENSG00000167508/ENSG00000112972/ENSG00000113161/ENSG00000160752/ENSG00000172893/ENSG00000079459/ENSG00000104549/ENSG00000132196/ENSG00000110921/ENSG00000072310	INSIG1/MSMO1/IDI1/FASN/SC5D/MVD/HMGCS1/HMGCR/FDPS/DHCR7/FDFT1/SQLE/HSD17B7/MVK/SREBF1	15	15	ENSG00000186480/ENSG00000052802/ENSG00000067064/ENSG00000169710/ENSG00000109929/ENSG00000167508/ENSG00000112972/ENSG00000113161/ENSG00000160752/ENSG00000172893/ENSG00000079459/ENSG00000104549/ENSG00000132196/ENSG00000110921/ENSG00000072310	0
BP	GO:0006694	steroid biosynthetic process	21/216	166/14673	4.26282e-14	2.28828e-11	ENSG00000186480/ENSG00000052802/ENSG00000067064/ENSG00000169710/ENSG00000109929/ENSG00000167508/ENSG00000164211/ENSG00000112972/ENSG00000113161/ENSG00000160752/ENSG00000172893/ENSG00000079459/ENSG00000140459/ENSG00000133935/ENSG00000104549/ENSG00000138135/ENSG00000132196/ENSG00000006025/ENSG00000110921/ENSG00000072310/ENSG00000115112	INSIG1/MSMO1/IDI1/FASN/SC5D/MVD/STARD4/HMGCS1/HMGCR/FDPS/DHCR7/FDFT1/CYP11A1/ERG28/SQLE/CH25H/HSD17B7/OSBPL7/MVK/SREBF1/TFCP2L1	21	20	ENSG00000186480/ENSG00000052802/ENSG00000067064/ENSG00000169710/ENSG00000109929/ENSG00000167508/ENSG00000164211/ENSG00000112972/ENSG00000113161/ENSG00000160752/ENSG00000172893/ENSG00000079459/ENSG00000140459/ENSG00000133935/ENSG00000104549/ENSG00000138135/ENSG00000132196/ENSG00000006025/ENSG00000110921/ENSG00000072310	1	ENSG00000115112
BP	GO:1902652	secondary alcohol metabolic process	19/216	133/14673	7.69328e-14	3.44146e-11	ENSG00000186480/ENSG00000052802/ENSG00000067064/ENSG00000169710/ENSG00000109929/ENSG00000167508/ENSG00000112972/ENSG00000113161/ENSG00000160752/ENSG00000172893/ENSG00000169174/ENSG00000079459/ENSG00000140459/ENSG00000133935/ENSG00000104549/ENSG00000138135/ENSG00000132196/ENSG00000110921/ENSG00000072310	INSIG1/MSMO1/IDI1/FASN/SC5D/MVD/HMGCS1/HMGCR/FDPS/DHCR7/PCSK9/FDFT1/CYP11A1/ERG28/SQLE/CH25H/HSD17B7/MVK/SREBF1	19	19	ENSG00000186480/ENSG00000052802/ENSG00000067064/ENSG00000169710/ENSG00000109929/ENSG00000167508/ENSG00000112972/ENSG00000113161/ENSG00000160752/ENSG00000172893/ENSG00000169174/ENSG00000079459/ENSG00000140459/ENSG00000133935/ENSG00000104549/ENSG00000138135/ENSG00000132196/ENSG00000110921/ENSG00000072310	0
BP	GO:0016125	sterol metabolic process	19/216	143/14673	2.95958e-13	1.13479e-10	ENSG00000186480/ENSG00000052802/ENSG00000067064/ENSG00000169710/ENSG00000109929/ENSG00000167508/ENSG00000112972/ENSG00000113161/ENSG00000160752/ENSG00000172893/ENSG00000169174/ENSG00000079459/ENSG00000140459/ENSG00000133935/ENSG00000104549/ENSG00000138135/ENSG00000132196/ENSG00000110921/ENSG00000072310	INSIG1/MSMO1/IDI1/FASN/SC5D/MVD/HMGCS1/HMGCR/FDPS/DHCR7/PCSK9/FDFT1/CYP11A1/ERG28/SQLE/CH25H/HSD17B7/MVK/SREBF1	19	19	ENSG00000186480/ENSG00000052802/ENSG00000067064/ENSG00000169710/ENSG00000109929/ENSG00000167508/ENSG00000112972/ENSG00000113161/ENSG00000160752/ENSG00000172893/ENSG00000169174/ENSG00000079459/ENSG00000140459/ENSG00000133935/ENSG00000104549/ENSG00000138135/ENSG00000132196/ENSG00000110921/ENSG00000072310	0
BP	GO:0008203	cholesterol metabolic process	18/216	128/14673	4.71677e-13	1.58248e-10	ENSG00000186480/ENSG00000052802/ENSG00000067064/ENSG00000169710/ENSG00000109929/ENSG00000167508/ENSG00000112972/ENSG00000113161/ENSG00000160752/ENSG00000172893/ENSG00000169174/ENSG00000079459/ENSG00000140459/ENSG00000104549/ENSG00000138135/ENSG00000132196/ENSG00000110921/ENSG00000072310	INSIG1/MSMO1/IDI1/FASN/SC5D/MVD/HMGCS1/HMGCR/FDPS/DHCR7/PCSK9/FDFT1/CYP11A1/SQLE/CH25H/HSD17B7/MVK/SREBF1	18	18	ENSG00000186480/ENSG00000052802/ENSG00000067064/ENSG00000169710/ENSG00000109929/ENSG00000167508/ENSG00000112972/ENSG00000113161/ENSG00000160752/ENSG00000172893/ENSG00000169174/ENSG00000079459/ENSG00000140459/ENSG00000104549/ENSG00000138135/ENSG00000132196/ENSG00000110921/ENSG00000072310	0
BP	GO:0045540	regulation of cholesterol biosynthetic process	12/216	42/14673	5.7193e-13	1.70562e-10	ENSG00000067064/ENSG00000169710/ENSG00000109929/ENSG00000167508/ENSG00000112972/ENSG00000113161/ENSG00000160752/ENSG00000172893/ENSG00000079459/ENSG00000104549/ENSG00000110921/ENSG00000072310	IDI1/FASN/SC5D/MVD/HMGCS1/HMGCR/FDPS/DHCR7/FDFT1/SQLE/MVK/SREBF1	12	12	ENSG00000067064/ENSG00000169710/ENSG00000109929/ENSG00000167508/ENSG00000112972/ENSG00000113161/ENSG00000160752/ENSG00000172893/ENSG00000079459/ENSG00000104549/ENSG00000110921/ENSG00000072310	0
BP	GO:0050810	regulation of steroid biosynthetic process	14/216	78/14673	6.56489e-12	1.76202e-09	ENSG00000186480/ENSG00000067064/ENSG00000169710/ENSG00000109929/ENSG00000167508/ENSG00000164211/ENSG00000112972/ENSG00000113161/ENSG00000160752/ENSG00000172893/ENSG00000079459/ENSG00000104549/ENSG00000110921/ENSG00000072310	INSIG1/IDI1/FASN/SC5D/MVD/STARD4/HMGCS1/HMGCR/FDPS/DHCR7/FDFT1/SQLE/MVK/SREBF1	14	14	ENSG00000186480/ENSG00000067064/ENSG00000169710/ENSG00000109929/ENSG00000167508/ENSG00000164211/ENSG00000112972/ENSG00000113161/ENSG00000160752/ENSG00000172893/ENSG00000079459/ENSG00000104549/ENSG00000110921/ENSG00000072310	0
BP	GO:0090181	regulation of cholesterol metabolic process	12/216	53/14673	1.19701e-11	2.92071e-09	ENSG00000067064/ENSG00000169710/ENSG00000109929/ENSG00000167508/ENSG00000112972/ENSG00000113161/ENSG00000160752/ENSG00000172893/ENSG00000079459/ENSG00000104549/ENSG00000110921/ENSG00000072310	IDI1/FASN/SC5D/MVD/HMGCS1/HMGCR/FDPS/DHCR7/FDFT1/SQLE/MVK/SREBF1	12	12	ENSG00000067064/ENSG00000169710/ENSG00000109929/ENSG00000167508/ENSG00000112972/ENSG00000113161/ENSG00000160752/ENSG00000172893/ENSG00000079459/ENSG00000104549/ENSG00000110921/ENSG00000072310	0
BP	GO:0019218	regulation of steroid metabolic process	15/216	100/14673	1.70596e-11	3.81566e-09	ENSG00000186480/ENSG00000067064/ENSG00000169710/ENSG00000109929/ENSG00000167508/ENSG00000164211/ENSG00000112972/ENSG00000113161/ENSG00000160752/ENSG00000172893/ENSG00000069667/ENSG00000079459/ENSG00000104549/ENSG00000110921/ENSG00000072310	INSIG1/IDI1/FASN/SC5D/MVD/STARD4/HMGCS1/HMGCR/FDPS/DHCR7/RORA/FDFT1/SQLE/MVK/SREBF1	15	15	ENSG00000186480/ENSG00000067064/ENSG00000169710/ENSG00000109929/ENSG00000167508/ENSG00000164211/ENSG00000112972/ENSG00000113161/ENSG00000160752/ENSG00000172893/ENSG00000069667/ENSG00000079459/ENSG00000104549/ENSG00000110921/ENSG00000072310	0
BP	GO:1902930	regulation of alcohol biosynthetic process	12/216	58/14673	3.75107e-11	7.74452e-09	ENSG00000067064/ENSG00000169710/ENSG00000109929/ENSG00000167508/ENSG00000112972/ENSG00000113161/ENSG00000160752/ENSG00000172893/ENSG00000079459/ENSG00000104549/ENSG00000110921/ENSG00000072310	IDI1/FASN/SC5D/MVD/HMGCS1/HMGCR/FDPS/DHCR7/FDFT1/SQLE/MVK/SREBF1	12	12	ENSG00000067064/ENSG00000169710/ENSG00000109929/ENSG00000167508/ENSG00000112972/ENSG00000113161/ENSG00000160752/ENSG00000172893/ENSG00000079459/ENSG00000104549/ENSG00000110921/ENSG00000072310	0
BP	GO:0046165	alcohol biosynthetic process	16/216	129/14673	6.85341e-11	1.3139e-08	ENSG00000186480/ENSG00000052802/ENSG00000067064/ENSG00000169710/ENSG00000109929/ENSG00000167508/ENSG00000112972/ENSG00000113161/ENSG00000160752/ENSG00000172893/ENSG00000079459/ENSG00000133935/ENSG00000104549/ENSG00000132196/ENSG00000110921/ENSG00000072310	INSIG1/MSMO1/IDI1/FASN/SC5D/MVD/HMGCS1/HMGCR/FDPS/DHCR7/FDFT1/ERG28/SQLE/HSD17B7/MVK/SREBF1	16	16	ENSG00000186480/ENSG00000052802/ENSG00000067064/ENSG00000169710/ENSG00000109929/ENSG00000167508/ENSG00000112972/ENSG00000113161/ENSG00000160752/ENSG00000172893/ENSG00000079459/ENSG00000133935/ENSG00000104549/ENSG00000132196/ENSG00000110921/ENSG00000072310	0
BP	GO:1901617	organic hydroxy compound biosynthetic process	19/216	212/14673	3.27804e-10	5.86551e-08	ENSG00000186480/ENSG00000052802/ENSG00000067064/ENSG00000169710/ENSG00000109929/ENSG00000167508/ENSG00000164211/ENSG00000112972/ENSG00000113161/ENSG00000160752/ENSG00000172893/ENSG00000079459/ENSG00000133935/ENSG00000104549/ENSG00000138135/ENSG00000132196/ENSG00000006025/ENSG00000110921/ENSG00000072310	INSIG1/MSMO1/IDI1/FASN/SC5D/MVD/STARD4/HMGCS1/HMGCR/FDPS/DHCR7/FDFT1/ERG28/SQLE/CH25H/HSD17B7/OSBPL7/MVK/SREBF1	19	19	ENSG00000186480/ENSG00000052802/ENSG00000067064/ENSG00000169710/ENSG00000109929/ENSG00000167508/ENSG00000164211/ENSG00000112972/ENSG00000113161/ENSG00000160752/ENSG00000172893/ENSG00000079459/ENSG00000133935/ENSG00000104549/ENSG00000138135/ENSG00000132196/ENSG00000006025/ENSG00000110921/ENSG00000072310	0
BP	GO:0046890	regulation of lipid biosynthetic process	16/216	152/14673	8.1788e-10	1.37199e-07	ENSG00000186480/ENSG00000067064/ENSG00000169710/ENSG00000109929/ENSG00000167508/ENSG00000164211/ENSG00000112972/ENSG00000113161/ENSG00000160752/ENSG00000172893/ENSG00000079459/ENSG00000104549/ENSG00000110921/ENSG00000156671/ENSG00000072310/ENSG00000012660	INSIG1/IDI1/FASN/SC5D/MVD/STARD4/HMGCS1/HMGCR/FDPS/DHCR7/FDFT1/SQLE/MVK/SAMD8/SREBF1/ELOVL5	16	16	ENSG00000186480/ENSG00000067064/ENSG00000169710/ENSG00000109929/ENSG00000167508/ENSG00000164211/ENSG00000112972/ENSG00000113161/ENSG00000160752/ENSG00000172893/ENSG00000079459/ENSG00000104549/ENSG00000110921/ENSG00000156671/ENSG00000072310/ENSG00000012660	0
BP	GO:0008299	isoprenoid biosynthetic process	8/216	27/14673	3.38156e-09	5.33888e-07	ENSG00000140465/ENSG00000067064/ENSG00000167508/ENSG00000112972/ENSG00000113161/ENSG00000160752/ENSG00000079459/ENSG00000110921	CYP1A1/IDI1/MVD/HMGCS1/HMGCR/FDPS/FDFT1/MVK	8	8	ENSG00000140465/ENSG00000067064/ENSG00000167508/ENSG00000112972/ENSG00000113161/ENSG00000160752/ENSG00000079459/ENSG00000110921	0
BP	GO:0006066	alcohol metabolic process	20/216	292/14673	1.20646e-08	1.79897e-06	ENSG00000186480/ENSG00000052802/ENSG00000067064/ENSG00000169710/ENSG00000109929/ENSG00000167508/ENSG00000112972/ENSG00000113161/ENSG00000160752/ENSG00000172893/ENSG00000169174/ENSG00000131069/ENSG00000079459/ENSG00000140459/ENSG00000133935/ENSG00000104549/ENSG00000138135/ENSG00000132196/ENSG00000110921/ENSG00000072310	INSIG1/MSMO1/IDI1/FASN/SC5D/MVD/HMGCS1/HMGCR/FDPS/DHCR7/PCSK9/ACSS2/FDFT1/CYP11A1/ERG28/SQLE/CH25H/HSD17B7/MVK/SREBF1	20	20	ENSG00000186480/ENSG00000052802/ENSG00000067064/ENSG00000169710/ENSG00000109929/ENSG00000167508/ENSG00000112972/ENSG00000113161/ENSG00000160752/ENSG00000172893/ENSG00000169174/ENSG00000131069/ENSG00000079459/ENSG00000140459/ENSG00000133935/ENSG00000104549/ENSG00000138135/ENSG00000132196/ENSG00000110921/ENSG00000072310	0
BP	GO:0019216	regulation of lipid metabolic process	21/216	327/14673	1.58699e-08	2.24183e-06	ENSG00000186480/ENSG00000140465/ENSG00000067064/ENSG00000169710/ENSG00000109929/ENSG00000167508/ENSG00000164211/ENSG00000112972/ENSG00000113161/ENSG00000160752/ENSG00000172893/ENSG00000182782/ENSG00000069667/ENSG00000079459/ENSG00000119508/ENSG00000100100/ENSG00000104549/ENSG00000110921/ENSG00000156671/ENSG00000072310/ENSG00000012660	INSIG1/CYP1A1/IDI1/FASN/SC5D/MVD/STARD4/HMGCS1/HMGCR/FDPS/DHCR7/HCAR2/RORA/FDFT1/NR4A3/PIK3IP1/SQLE/MVK/SAMD8/SREBF1/ELOVL5	21	20	ENSG00000186480/ENSG00000140465/ENSG00000067064/ENSG00000169710/ENSG00000109929/ENSG00000167508/ENSG00000164211/ENSG00000112972/ENSG00000113161/ENSG00000160752/ENSG00000172893/ENSG00000182782/ENSG00000069667/ENSG00000079459/ENSG00000100100/ENSG00000104549/ENSG00000110921/ENSG00000156671/ENSG00000072310/ENSG00000012660	1	ENSG00000119508
BP	GO:1901615	organic hydroxy compound metabolic process	24/216	442/14673	3.67058e-08	4.92592e-06	ENSG00000186480/ENSG00000140465/ENSG00000052802/ENSG00000067064/ENSG00000169710/ENSG00000109929/ENSG00000167508/ENSG00000019186/ENSG00000164211/ENSG00000112972/ENSG00000113161/ENSG00000160752/ENSG00000172893/ENSG00000169174/ENSG00000131069/ENSG00000079459/ENSG00000140459/ENSG00000133935/ENSG00000104549/ENSG00000138135/ENSG00000132196/ENSG00000006025/ENSG00000110921/ENSG00000072310	INSIG1/CYP1A1/MSMO1/IDI1/FASN/SC5D/MVD/CYP24A1/STARD4/HMGCS1/HMGCR/FDPS/DHCR7/PCSK9/ACSS2/FDFT1/CYP11A1/ERG28/SQLE/CH25H/HSD17B7/OSBPL7/MVK/SREBF1	24	24	ENSG00000186480/ENSG00000140465/ENSG00000052802/ENSG00000067064/ENSG00000169710/ENSG00000109929/ENSG00000167508/ENSG00000019186/ENSG00000164211/ENSG00000112972/ENSG00000113161/ENSG00000160752/ENSG00000172893/ENSG00000169174/ENSG00000131069/ENSG00000079459/ENSG00000140459/ENSG00000133935/ENSG00000104549/ENSG00000138135/ENSG00000132196/ENSG00000006025/ENSG00000110921/ENSG00000072310	0
BP	GO:0006644	phospholipid metabolic process	19/216	419/14673	1.42658e-05	0.00182331	ENSG00000158201/ENSG00000067064/ENSG00000167508/ENSG00000112972/ENSG00000101670/ENSG00000160752/ENSG00000169174/ENSG00000125772/ENSG00000079459/ENSG00000158458/ENSG00000100100/ENSG00000069764/ENSG00000110921/ENSG00000100078/ENSG00000156671/ENSG00000100344/ENSG00000100439/ENSG00000121316/ENSG00000124882	ABHD3/IDI1/MVD/HMGCS1/LIPG/FDPS/PCSK9/GPCPD1/FDFT1/NRG2/PIK3IP1/PLA2G10/MVK/PLA2G3/SAMD8/PNPLA3/ABHD4/PLBD1/EREG	19	19	ENSG00000158201/ENSG00000067064/ENSG00000167508/ENSG00000112972/ENSG00000101670/ENSG00000160752/ENSG00000169174/ENSG00000125772/ENSG00000079459/ENSG00000158458/ENSG00000100100/ENSG00000069764/ENSG00000110921/ENSG00000100078/ENSG00000156671/ENSG00000100344/ENSG00000100439/ENSG00000121316/ENSG00000124882	0
BP	GO:0062012	regulation of small molecule metabolic process	19/216	422/14673	1.57605e-05	0.00192278	ENSG00000186480/ENSG00000067064/ENSG00000169710/ENSG00000109929/ENSG00000167508/ENSG00000164211/ENSG00000112972/ENSG00000113161/ENSG00000160752/ENSG00000172893/ENSG00000069667/ENSG00000079459/ENSG00000119508/ENSG00000168209/ENSG00000104549/ENSG00000205060/ENSG00000110921/ENSG00000072310/ENSG00000012660	INSIG1/IDI1/FASN/SC5D/MVD/STARD4/HMGCS1/HMGCR/FDPS/DHCR7/RORA/FDFT1/NR4A3/DDIT4/SQLE/SLC35B4/MVK/SREBF1/ELOVL5	19	17	ENSG00000186480/ENSG00000067064/ENSG00000169710/ENSG00000109929/ENSG00000167508/ENSG00000164211/ENSG00000112972/ENSG00000113161/ENSG00000160752/ENSG00000172893/ENSG00000069667/ENSG00000079459/ENSG00000168209/ENSG00000104549/ENSG00000110921/ENSG00000072310/ENSG00000012660	2	ENSG00000119508/ENSG00000205060
BP	GO:0072330	monocarboxylic acid biosynthetic process	14/216	268/14673	4.39607e-05	0.00513002	ENSG00000186480/ENSG00000140465/ENSG00000158201/ENSG00000169710/ENSG00000164211/ENSG00000131069/ENSG00000173546/ENSG00000168209/ENSG00000138135/ENSG00000006025/ENSG00000165434/ENSG00000109107/ENSG00000012779/ENSG00000012660	INSIG1/CYP1A1/ABHD3/FASN/STARD4/ACSS2/CSPG4/DDIT4/CH25H/OSBPL7/PGM2L1/ALDOC/ALOX5/ELOVL5	14	13	ENSG00000186480/ENSG00000140465/ENSG00000158201/ENSG00000169710/ENSG00000164211/ENSG00000131069/ENSG00000168209/ENSG00000138135/ENSG00000006025/ENSG00000165434/ENSG00000109107/ENSG00000012779/ENSG00000012660	1	ENSG00000173546
BP	GO:0036315	cellular response to sterol	4/216	15/14673	5.48891e-05	0.00613844	ENSG00000186480/ENSG00000112972/ENSG00000069667/ENSG00000006025	INSIG1/HMGCS1/RORA/OSBPL7	4	4	ENSG00000186480/ENSG00000112972/ENSG00000069667/ENSG00000006025	0
BP	GO:0006084	acetyl-CoA metabolic process	5/216	33/14673	0.00011195	0.012019	ENSG00000169710/ENSG00000167508/ENSG00000112972/ENSG00000131069/ENSG00000110921	FASN/MVD/HMGCS1/ACSS2/MVK	5	5	ENSG00000169710/ENSG00000167508/ENSG00000112972/ENSG00000131069/ENSG00000110921	0
BP	GO:0055088	lipid homeostasis	8/216	101/14673	0.00012108	0.0124992	ENSG00000186480/ENSG00000101670/ENSG00000169174/ENSG00000007944/ENSG00000069667/ENSG00000069764/ENSG00000100344/ENSG00000100439	INSIG1/LIPG/PCSK9/MYLIP/RORA/PLA2G10/PNPLA3/ABHD4	8	8	ENSG00000186480/ENSG00000101670/ENSG00000169174/ENSG00000007944/ENSG00000069667/ENSG00000069764/ENSG00000100344/ENSG00000100439	0
BP	GO:0006720	isoprenoid metabolic process	8/216	106/14673	0.000169697	0.0168692	ENSG00000140465/ENSG00000067064/ENSG00000167508/ENSG00000112972/ENSG00000113161/ENSG00000160752/ENSG00000079459/ENSG00000110921	CYP1A1/IDI1/MVD/HMGCS1/HMGCR/FDPS/FDFT1/MVK	8	8	ENSG00000140465/ENSG00000067064/ENSG00000167508/ENSG00000112972/ENSG00000113161/ENSG00000160752/ENSG00000079459/ENSG00000110921	0
BP	GO:0036314	response to sterol	4/216	22/14673	0.00027129	0.0260051	ENSG00000186480/ENSG00000112972/ENSG00000069667/ENSG00000006025	INSIG1/HMGCS1/RORA/OSBPL7	4	4	ENSG00000186480/ENSG00000112972/ENSG00000069667/ENSG00000006025	0
BP	GO:0031667	response to nutrient levels	16/216	403/14673	0.000316518	0.0292943	ENSG00000140465/ENSG00000019186/ENSG00000112972/ENSG00000113161/ENSG00000101670/ENSG00000137193/ENSG00000169174/ENSG00000175895/ENSG00000002726/ENSG00000166575/ENSG00000129355/ENSG00000102967/ENSG00000068366/ENSG00000072310/ENSG00000239282/ENSG00000170296	CYP1A1/CYP24A1/HMGCS1/HMGCR/LIPG/PIM1/PCSK9/PLEKHF2/AOC1/TMEM135/CDKN2D/DHODH/ACSL4/SREBF1/CASTOR1/GABARAP	16	15	ENSG00000140465/ENSG00000019186/ENSG00000112972/ENSG00000113161/ENSG00000101670/ENSG00000137193/ENSG00000169174/ENSG00000175895/ENSG00000002726/ENSG00000166575/ENSG00000129355/ENSG00000068366/ENSG00000072310/ENSG00000239282/ENSG00000170296	1	ENSG00000102967
BP	GO:0006631	fatty acid metabolic process	14/216	329/14673	0.000376965	0.0337258	ENSG00000186480/ENSG00000140465/ENSG00000052802/ENSG00000158201/ENSG00000169710/ENSG00000131069/ENSG00000119508/ENSG00000069764/ENSG00000100078/ENSG00000068366/ENSG00000012779/ENSG00000100344/ENSG00000072310/ENSG00000012660	INSIG1/CYP1A1/MSMO1/ABHD3/FASN/ACSS2/NR4A3/PLA2G10/PLA2G3/ACSL4/ALOX5/PNPLA3/SREBF1/ELOVL5	14	13	ENSG00000186480/ENSG00000140465/ENSG00000052802/ENSG00000158201/ENSG00000169710/ENSG00000131069/ENSG00000069764/ENSG00000100078/ENSG00000068366/ENSG00000012779/ENSG00000100344/ENSG00000072310/ENSG00000012660	1	ENSG00000119508
BP	GO:0006637	acyl-CoA metabolic process	7/216	93/14673	0.000441037	0.0345127	ENSG00000169710/ENSG00000167508/ENSG00000112972/ENSG00000131069/ENSG00000110921/ENSG00000068366/ENSG00000012660	FASN/MVD/HMGCS1/ACSS2/MVK/ACSL4/ELOVL5	7	7	ENSG00000169710/ENSG00000167508/ENSG00000112972/ENSG00000131069/ENSG00000110921/ENSG00000068366/ENSG00000012660	0
BP	GO:0035383	thioester metabolic process	7/216	93/14673	0.000441037	0.0345127	ENSG00000169710/ENSG00000167508/ENSG00000112972/ENSG00000131069/ENSG00000110921/ENSG00000068366/ENSG00000012660	FASN/MVD/HMGCS1/ACSS2/MVK/ACSL4/ELOVL5	7	7	ENSG00000169710/ENSG00000167508/ENSG00000112972/ENSG00000131069/ENSG00000110921/ENSG00000068366/ENSG00000012660	0
BP	GO:0046394	carboxylic acid biosynthetic process	15/216	375/14673	0.000450221	0.0345127	ENSG00000186480/ENSG00000140465/ENSG00000158201/ENSG00000169710/ENSG00000164211/ENSG00000131069/ENSG00000173546/ENSG00000168209/ENSG00000104524/ENSG00000138135/ENSG00000006025/ENSG00000165434/ENSG00000109107/ENSG00000012779/ENSG00000012660	INSIG1/CYP1A1/ABHD3/FASN/STARD4/ACSS2/CSPG4/DDIT4/PYCR3/CH25H/OSBPL7/PGM2L1/ALDOC/ALOX5/ELOVL5	15	13	ENSG00000186480/ENSG00000140465/ENSG00000158201/ENSG00000169710/ENSG00000164211/ENSG00000131069/ENSG00000168209/ENSG00000138135/ENSG00000006025/ENSG00000165434/ENSG00000109107/ENSG00000012779/ENSG00000012660	2	ENSG00000173546/ENSG00000104524
BP	GO:0036152	phosphatidylethanolamine acyl-chain remodeling	4/216	25/14673	0.000453197	0.0345127	ENSG00000069764/ENSG00000100078/ENSG00000100439/ENSG00000121316	PLA2G10/PLA2G3/ABHD4/PLBD1	4	4	ENSG00000069764/ENSG00000100078/ENSG00000100439/ENSG00000121316	0
BP	GO:0007584	response to nutrient	10/216	187/14673	0.000455324	0.0345127	ENSG00000140465/ENSG00000019186/ENSG00000112972/ENSG00000113161/ENSG00000101670/ENSG00000137193/ENSG00000129355/ENSG00000102967/ENSG00000068366/ENSG00000239282	CYP1A1/CYP24A1/HMGCS1/HMGCR/LIPG/PIM1/CDKN2D/DHODH/ACSL4/CASTOR1	10	9	ENSG00000140465/ENSG00000019186/ENSG00000112972/ENSG00000113161/ENSG00000101670/ENSG00000137193/ENSG00000129355/ENSG00000068366/ENSG00000239282	1	ENSG00000102967
BP	GO:0016053	organic acid biosynthetic process	15/216	376/14673	0.000462913	0.0345127	ENSG00000186480/ENSG00000140465/ENSG00000158201/ENSG00000169710/ENSG00000164211/ENSG00000131069/ENSG00000173546/ENSG00000168209/ENSG00000104524/ENSG00000138135/ENSG00000006025/ENSG00000165434/ENSG00000109107/ENSG00000012779/ENSG00000012660	INSIG1/CYP1A1/ABHD3/FASN/STARD4/ACSS2/CSPG4/DDIT4/PYCR3/CH25H/OSBPL7/PGM2L1/ALDOC/ALOX5/ELOVL5	15	13	ENSG00000186480/ENSG00000140465/ENSG00000158201/ENSG00000169710/ENSG00000164211/ENSG00000131069/ENSG00000168209/ENSG00000138135/ENSG00000006025/ENSG00000165434/ENSG00000109107/ENSG00000012779/ENSG00000012660	2	ENSG00000173546/ENSG00000104524
BP	GO:0009991	response to extracellular stimulus	16/216	430/14673	0.000642244	0.0465887	ENSG00000140465/ENSG00000019186/ENSG00000112972/ENSG00000113161/ENSG00000101670/ENSG00000137193/ENSG00000169174/ENSG00000175895/ENSG00000002726/ENSG00000166575/ENSG00000129355/ENSG00000102967/ENSG00000068366/ENSG00000072310/ENSG00000239282/ENSG00000170296	CYP1A1/CYP24A1/HMGCS1/HMGCR/LIPG/PIM1/PCSK9/PLEKHF2/AOC1/TMEM135/CDKN2D/DHODH/ACSL4/SREBF1/CASTOR1/GABARAP	16	15	ENSG00000140465/ENSG00000019186/ENSG00000112972/ENSG00000113161/ENSG00000101670/ENSG00000137193/ENSG00000169174/ENSG00000175895/ENSG00000002726/ENSG00000166575/ENSG00000129355/ENSG00000068366/ENSG00000072310/ENSG00000239282/ENSG00000170296	1	ENSG00000102967
MF	GO:0004623	phospholipase A2 activity	5/222	31/14701	9.25942e-05	0.0387044	ENSG00000158201/ENSG00000069764/ENSG00000100078/ENSG00000100344/ENSG00000121316	ABHD3/PLA2G10/PLA2G3/PNPLA3/PLBD1	5	5	ENSG00000158201/ENSG00000069764/ENSG00000100078/ENSG00000100344/ENSG00000121316	0
MF	GO:0016709	oxidoreductase activity, acting on paired donors, with incorporation or reduction of molecular oxygen, NAD(P)H as one donor, and incorporation of one atom of oxygen	5/222	36/14701	0.000193217	0.0403823	ENSG00000140465/ENSG00000052802/ENSG00000140459/ENSG00000104549/ENSG00000138135	CYP1A1/MSMO1/CYP11A1/SQLE/CH25H	5	5	ENSG00000140465/ENSG00000052802/ENSG00000140459/ENSG00000104549/ENSG00000138135	0

## Sheet: C vs M
Category	GOID	Description	GeneRatio	BgRatio	pvalue	padj	geneID	geneName	Count	Up	Up_Gene_names	Down	Down_Gene_names
BP	GO:0006614	SRP-dependent cotranslational protein targeting to membrane	72/3465	91/14357	2.29644e-28	1.32091e-24	ENSG00000089009/ENSG00000122026/ENSG00000156482/ENSG00000105372/ENSG00000186468/ENSG00000143947/ENSG00000008988/ENSG00000136942/ENSG00000147604/ENSG00000106803/ENSG00000137818/ENSG00000114391/ENSG00000137154/ENSG00000182899/ENSG00000171863/ENSG00000115268/ENSG00000168028/ENSG00000125691/ENSG00000130255/ENSG00000163682/ENSG00000149273/ENSG00000110700/ENSG00000142541/ENSG00000131469/ENSG00000122406…	RPL6/RPL21/RPL30/RPS19/RPS23/RPS27A/RPS20/RPL35/RPL7/SEC61B/RPLP1/RPL24/RPS6/RPL35A/RPS7/RPS15/RPSA/RPL23/RPL36/RPL9/RPS3/RPS13/RPL13A/RPL27/RPL5/RPLP2/RPS12/RPL13/SRP14/RPS9/RPL19/RPLP0/RPS16/RPS4X/RPL27A/RPL10/RPL15/RPL34/RPS11/RPL32/RPL11/RPL18/RPS26/UBA52/RPS3A/RPL8/RPS8/RPL41/RPL7A/RPL4/RPS2/RPL18A/RPL10A/RPL37A/RPL39/RPS18/RPL29/RPS5/RPL38/RPL37/RPL3/RPS25/RPS14/RPL26/RPS27/RPS28/RPS21/RPL2…	72	0		72	ENSG00000089009/ENSG00000122026/ENSG00000156482/ENSG00000105372/ENSG00000186468/ENSG00000143947/ENSG00000008988/ENSG00000136942/ENSG00000147604/ENSG00000106803/ENSG00000137818/ENSG00000114391/ENSG00000137154/ENSG00000182899/ENSG00000171863/ENSG00000115268/ENSG00000168028/ENSG00000125691/ENSG00000130255/ENSG00000163682/ENSG00000149273/ENSG00000110700/ENSG00000142541/ENSG00000131469/ENSG00000122406…
BP	GO:0006613	cotranslational protein targeting to membrane	72/3465	96/14357	8.69232e-26	2.49991e-22	ENSG00000089009/ENSG00000122026/ENSG00000156482/ENSG00000105372/ENSG00000186468/ENSG00000143947/ENSG00000008988/ENSG00000136942/ENSG00000147604/ENSG00000106803/ENSG00000137818/ENSG00000114391/ENSG00000137154/ENSG00000182899/ENSG00000171863/ENSG00000115268/ENSG00000168028/ENSG00000125691/ENSG00000130255/ENSG00000163682/ENSG00000149273/ENSG00000110700/ENSG00000142541/ENSG00000131469/ENSG00000122406…	RPL6/RPL21/RPL30/RPS19/RPS23/RPS27A/RPS20/RPL35/RPL7/SEC61B/RPLP1/RPL24/RPS6/RPL35A/RPS7/RPS15/RPSA/RPL23/RPL36/RPL9/RPS3/RPS13/RPL13A/RPL27/RPL5/RPLP2/RPS12/RPL13/SRP14/RPS9/RPL19/RPLP0/RPS16/RPS4X/RPL27A/RPL10/RPL15/RPL34/RPS11/RPL32/RPL11/RPL18/RPS26/UBA52/RPS3A/RPL8/RPS8/RPL41/RPL7A/RPL4/RPS2/RPL18A/RPL10A/RPL37A/RPL39/RPS18/RPL29/RPS5/RPL38/RPL37/RPL3/RPS25/RPS14/RPL26/RPS27/RPS28/RPS21/RPL2…	72	0		72	ENSG00000089009/ENSG00000122026/ENSG00000156482/ENSG00000105372/ENSG00000186468/ENSG00000143947/ENSG00000008988/ENSG00000136942/ENSG00000147604/ENSG00000106803/ENSG00000137818/ENSG00000114391/ENSG00000137154/ENSG00000182899/ENSG00000171863/ENSG00000115268/ENSG00000168028/ENSG00000125691/ENSG00000130255/ENSG00000163682/ENSG00000149273/ENSG00000110700/ENSG00000142541/ENSG00000131469/ENSG00000122406…
BP	GO:0045047	protein targeting to ER	74/3465	101/14357	2.20736e-25	4.23225e-22	ENSG00000089009/ENSG00000122026/ENSG00000156482/ENSG00000105372/ENSG00000186468/ENSG00000143947/ENSG00000008988/ENSG00000136942/ENSG00000147604/ENSG00000106803/ENSG00000137818/ENSG00000114391/ENSG00000137154/ENSG00000182899/ENSG00000171863/ENSG00000115268/ENSG00000168028/ENSG00000125691/ENSG00000130255/ENSG00000163682/ENSG00000149273/ENSG00000110700/ENSG00000142541/ENSG00000131469/ENSG00000122406…	RPL6/RPL21/RPL30/RPS19/RPS23/RPS27A/RPS20/RPL35/RPL7/SEC61B/RPLP1/RPL24/RPS6/RPL35A/RPS7/RPS15/RPSA/RPL23/RPL36/RPL9/RPS3/RPS13/RPL13A/RPL27/RPL5/RPLP2/RPS12/RPL13/SRP14/RPS9/RPL19/RPLP0/RPS16/RPS4X/RPL27A/RPL10/RPL15/RPL34/RPS11/RPL32/RPL11/RPL18/RPS26/UBA52/RPS3A/RPL8/RPS8/SPCS1/RPL41/RPL7A/SEC61G/RPL4/RPS2/RPL18A/RPL10A/RPL37A/RPL39/RPS18/RPL29/RPS5/RPL38/RPL37/RPL3/RPS25/RPS14/RPL26/RPS27/RPS…	74	0		74	ENSG00000089009/ENSG00000122026/ENSG00000156482/ENSG00000105372/ENSG00000186468/ENSG00000143947/ENSG00000008988/ENSG00000136942/ENSG00000147604/ENSG00000106803/ENSG00000137818/ENSG00000114391/ENSG00000137154/ENSG00000182899/ENSG00000171863/ENSG00000115268/ENSG00000168028/ENSG00000125691/ENSG00000130255/ENSG00000163682/ENSG00000149273/ENSG00000110700/ENSG00000142541/ENSG00000131469/ENSG00000122406…
BP	GO:0072599	establishment of protein localization to endoplasmic reticulum	74/3465	105/14357	1.15273e-23	1.65763e-20	ENSG00000089009/ENSG00000122026/ENSG00000156482/ENSG00000105372/ENSG00000186468/ENSG00000143947/ENSG00000008988/ENSG00000136942/ENSG00000147604/ENSG00000106803/ENSG00000137818/ENSG00000114391/ENSG00000137154/ENSG00000182899/ENSG00000171863/ENSG00000115268/ENSG00000168028/ENSG00000125691/ENSG00000130255/ENSG00000163682/ENSG00000149273/ENSG00000110700/ENSG00000142541/ENSG00000131469/ENSG00000122406…	RPL6/RPL21/RPL30/RPS19/RPS23/RPS27A/RPS20/RPL35/RPL7/SEC61B/RPLP1/RPL24/RPS6/RPL35A/RPS7/RPS15/RPSA/RPL23/RPL36/RPL9/RPS3/RPS13/RPL13A/RPL27/RPL5/RPLP2/RPS12/RPL13/SRP14/RPS9/RPL19/RPLP0/RPS16/RPS4X/RPL27A/RPL10/RPL15/RPL34/RPS11/RPL32/RPL11/RPL18/RPS26/UBA52/RPS3A/RPL8/RPS8/SPCS1/RPL41/RPL7A/SEC61G/RPL4/RPS2/RPL18A/RPL10A/RPL37A/RPL39/RPS18/RPL29/RPS5/RPL38/RPL37/RPL3/RPS25/RPS14/RPL26/RPS27/RPS…	74	0		74	ENSG00000089009/ENSG00000122026/ENSG00000156482/ENSG00000105372/ENSG00000186468/ENSG00000143947/ENSG00000008988/ENSG00000136942/ENSG00000147604/ENSG00000106803/ENSG00000137818/ENSG00000114391/ENSG00000137154/ENSG00000182899/ENSG00000171863/ENSG00000115268/ENSG00000168028/ENSG00000125691/ENSG00000130255/ENSG00000163682/ENSG00000149273/ENSG00000110700/ENSG00000142541/ENSG00000131469/ENSG00000122406…
BP	GO:0000184	nuclear-transcribed mRNA catabolic process, nonsense-mediated decay	77/3465	119/14357	5.62528e-21	6.47133e-18	ENSG00000265241/ENSG00000134030/ENSG00000089009/ENSG00000122026/ENSG00000156482/ENSG00000105372/ENSG00000186468/ENSG00000143947/ENSG00000008988/ENSG00000136942/ENSG00000162385/ENSG00000147604/ENSG00000137818/ENSG00000114391/ENSG00000137154/ENSG00000182899/ENSG00000171863/ENSG00000115268/ENSG00000168028/ENSG00000125691/ENSG00000130255/ENSG00000163682/ENSG00000149273/ENSG00000110700/ENSG00000142541…	RBM8A/CTIF/RPL6/RPL21/RPL30/RPS19/RPS23/RPS27A/RPS20/RPL35/MAGOH/RPL7/RPLP1/RPL24/RPS6/RPL35A/RPS7/RPS15/RPSA/RPL23/RPL36/RPL9/RPS3/RPS13/RPL13A/RPL27/RPL5/RPLP2/RPS12/RPL13/RPS9/RPL19/RPLP0/RPS16/RPS4X/RPL27A/RPL10/RPL15/RPL34/RPS11/RPL32/RPL11/RPL18/RPS26/UBA52/RPS3A/RPL8/RPS8/DCP1A/RPL41/RPL7A/RPL4/RPS2/RPL18A/RPL10A/RPL37A/RPL39/RPS18/RPL29/RPS5/RPL38/RPL37/RPL3/RPS25/RPS14/RPL26/SMG1/RPS27/R…	77	4	ENSG00000134030/ENSG00000272886/ENSG00000157106/ENSG00000172795	73	ENSG00000265241/ENSG00000089009/ENSG00000122026/ENSG00000156482/ENSG00000105372/ENSG00000186468/ENSG00000143947/ENSG00000008988/ENSG00000136942/ENSG00000162385/ENSG00000147604/ENSG00000137818/ENSG00000114391/ENSG00000137154/ENSG00000182899/ENSG00000171863/ENSG00000115268/ENSG00000168028/ENSG00000125691/ENSG00000130255/ENSG00000163682/ENSG00000149273/ENSG00000110700/ENSG00000142541/ENSG00000131469…
BP	GO:0006364	rRNA processing	130/3465	264/14357	4.15293e-19	3.98128e-16	ENSG00000101361/ENSG00000089009/ENSG00000122026/ENSG00000117395/ENSG00000156482/ENSG00000114767/ENSG00000105372/ENSG00000186468/ENSG00000143947/ENSG00000008988/ENSG00000136942/ENSG00000147604/ENSG00000136271/ENSG00000137818/ENSG00000114391/ENSG00000166197/ENSG00000137154/ENSG00000184967/ENSG00000182899/ENSG00000171863/ENSG00000047056/ENSG00000115268/ENSG00000168028/ENSG00000125691/ENSG00000130255…	NOP56/RPL6/RPL21/EBNA1BP2/RPL30/RRP9/RPS19/RPS23/RPS27A/RPS20/RPL35/RPL7/DDX56/RPLP1/RPL24/NOLC1/RPS6/NOC4L/RPL35A/RPS7/WDR37/RPS15/RPSA/RPL23/RPL36/RPL9/RPS3/RPS13/TRMT112/TSR3/RPL13A/MRTO4/PNO1/RPL27/RPL5/RPLP2/RPS12/RPL13/NOP10/RPS9/EXOSC4/ABT1/RPL19/RPLP0/EIF6/RPS16/RPS4X/RPL27A/RPL10/RPL15/RPL34/NHP2/RPS11/RPL32/RPL11/RPL18/RPS26/BUD23/UBA52/RPS3A/RPL8/RRP7A/RPS8/NOP58/RPL41/RPL7A/RPL4/RPS2/…	130	5	ENSG00000047056/ENSG00000164603/ENSG00000121274/ENSG00000171316/ENSG00000213782	125	ENSG00000101361/ENSG00000089009/ENSG00000122026/ENSG00000117395/ENSG00000156482/ENSG00000114767/ENSG00000105372/ENSG00000186468/ENSG00000143947/ENSG00000008988/ENSG00000136942/ENSG00000147604/ENSG00000136271/ENSG00000137818/ENSG00000114391/ENSG00000166197/ENSG00000137154/ENSG00000184967/ENSG00000182899/ENSG00000171863/ENSG00000115268/ENSG00000168028/ENSG00000125691/ENSG00000130255/ENSG00000163682…
BP	GO:0070972	protein localization to endoplasmic reticulum	77/3465	130/14357	1.13774e-17	9.34895e-15	ENSG00000186480/ENSG00000089009/ENSG00000122026/ENSG00000156482/ENSG00000105372/ENSG00000186468/ENSG00000143947/ENSG00000008988/ENSG00000136942/ENSG00000147604/ENSG00000106803/ENSG00000137818/ENSG00000114391/ENSG00000137154/ENSG00000182899/ENSG00000171863/ENSG00000115268/ENSG00000168028/ENSG00000125691/ENSG00000197858/ENSG00000130255/ENSG00000163682/ENSG00000149273/ENSG00000110700/ENSG00000142541…	INSIG1/RPL6/RPL21/RPL30/RPS19/RPS23/RPS27A/RPS20/RPL35/RPL7/SEC61B/RPLP1/RPL24/RPS6/RPL35A/RPS7/RPS15/RPSA/RPL23/GPAA1/RPL36/RPL9/RPS3/RPS13/RPL13A/RPL27/RPL5/RPLP2/RPS12/RPL13/SRP14/RPS9/RPL19/RPLP0/RPS16/RPS4X/RPL27A/RPL10/RPL15/RPL34/RPS11/RPL32/RPL11/RPL18/RPS26/UBA52/RPS3A/RPL8/RPS8/SPCS1/RPL41/RPL7A/SEC61G/RPL4/RPS2/RPL18A/RPL10A/RPL37A/RPL39/RPS18/RPL29/RPS5/RPL38/RPL37/RPL3/RPS25/RPS14/RP…	77	1	ENSG00000186480	76	ENSG00000089009/ENSG00000122026/ENSG00000156482/ENSG00000105372/ENSG00000186468/ENSG00000143947/ENSG00000008988/ENSG00000136942/ENSG00000147604/ENSG00000106803/ENSG00000137818/ENSG00000114391/ENSG00000137154/ENSG00000182899/ENSG00000171863/ENSG00000115268/ENSG00000168028/ENSG00000125691/ENSG00000197858/ENSG00000130255/ENSG00000163682/ENSG00000149273/ENSG00000110700/ENSG00000142541/ENSG00000131469…
BP	GO:0019083	viral transcription	94/3465	174/14357	1.57554e-17	1.13281e-14	ENSG00000185591/ENSG00000089009/ENSG00000122026/ENSG00000156482/ENSG00000165916/ENSG00000105372/ENSG00000186468/ENSG00000154370/ENSG00000143947/ENSG00000008988/ENSG00000136942/ENSG00000147604/ENSG00000137818/ENSG00000114391/ENSG00000048649/ENSG00000137154/ENSG00000182899/ENSG00000171863/ENSG00000115268/ENSG00000168028/ENSG00000125691/ENSG00000130255/ENSG00000163682/ENSG00000149273/ENSG00000110700…	SP1/RPL6/RPL21/RPL30/PSMC3/RPS19/RPS23/TRIM11/RPS27A/RPS20/RPL35/RPL7/RPLP1/RPL24/RSF1/RPS6/RPL35A/RPS7/RPS15/RPSA/RPL23/RPL36/RPL9/RPS3/RPS13/POLR2L/RPL13A/POLR2K/RPL27/RPL5/RPLP2/RPS12/RPL13/RPS9/RPL19/RPLP0/RPS16/RPS4X/RPL27A/RPL10/RPL15/RPL34/RPS11/RPL32/RPL11/RPL18/RPS26/UBA52/RPS3A/POLR2G/RPL8/RPS8/RPL41/RPL7A/NELFE/RPL4/RPS2/RPL18A/RPL10A/RPL37A/RPL39/POLR2C/RPS18/RPL29/USF1/RPS5/RPL38/RPL…	94	14	ENSG00000185591/ENSG00000154370/ENSG00000048649/ENSG00000158773/ENSG00000139496/ENSG00000129315/ENSG00000080561/ENSG00000137709/ENSG00000100393/ENSG00000084093/ENSG00000128016/ENSG00000064995/ENSG00000204977/ENSG00000153922	80	ENSG00000089009/ENSG00000122026/ENSG00000156482/ENSG00000165916/ENSG00000105372/ENSG00000186468/ENSG00000143947/ENSG00000008988/ENSG00000136942/ENSG00000147604/ENSG00000137818/ENSG00000114391/ENSG00000137154/ENSG00000182899/ENSG00000171863/ENSG00000115268/ENSG00000168028/ENSG00000125691/ENSG00000130255/ENSG00000163682/ENSG00000149273/ENSG00000110700/ENSG00000177700/ENSG00000142541/ENSG00000147669…
BP	GO:0016072	rRNA metabolic process	137/3465	297/14357	5.64281e-17	3.60638e-14	ENSG00000101361/ENSG00000089009/ENSG00000122026/ENSG00000117395/ENSG00000156482/ENSG00000114767/ENSG00000105372/ENSG00000186468/ENSG00000143947/ENSG00000008988/ENSG00000136942/ENSG00000147604/ENSG00000136271/ENSG00000137818/ENSG00000114391/ENSG00000166197/ENSG00000123144/ENSG00000137154/ENSG00000184967/ENSG00000182899/ENSG00000171863/ENSG00000047056/ENSG00000115268/ENSG00000168028/ENSG00000125691…	NOP56/RPL6/RPL21/EBNA1BP2/RPL30/RRP9/RPS19/RPS23/RPS27A/RPS20/RPL35/RPL7/DDX56/RPLP1/RPL24/NOLC1/TRIR/RPS6/NOC4L/RPL35A/RPS7/WDR37/RPS15/RPSA/RPL23/RPL36/RPL9/RPS3/RPS13/TRMT112/TSR3/RPL13A/MRTO4/PNO1/RPL27/RPL5/RPLP2/RPS12/RPL13/NOP10/RPS9/EXOSC4/ABT1/RPL19/RPLP0/EIF6/RPS16/RPS4X/RPL27A/RPL10/RPL15/RPL34/NHP2/RPS11/RPL32/RPL11/RPL18/RPS26/BUD23/UBA52/RPS3A/RPL8/RRP7A/RPS8/NOP58/RPL41/RPL7A/RPL4/…	137	6	ENSG00000047056/ENSG00000114127/ENSG00000164603/ENSG00000121274/ENSG00000171316/ENSG00000213782	131	ENSG00000101361/ENSG00000089009/ENSG00000122026/ENSG00000117395/ENSG00000156482/ENSG00000114767/ENSG00000105372/ENSG00000186468/ENSG00000143947/ENSG00000008988/ENSG00000136942/ENSG00000147604/ENSG00000136271/ENSG00000137818/ENSG00000114391/ENSG00000166197/ENSG00000123144/ENSG00000137154/ENSG00000184967/ENSG00000182899/ENSG00000171863/ENSG00000115268/ENSG00000168028/ENSG00000125691/ENSG00000130255…
BP	GO:0042254	ribosome biogenesis	146/3465	328/14357	2.48037e-16	1.42671e-13	ENSG00000101361/ENSG00000132603/ENSG00000089009/ENSG00000122026/ENSG00000117395/ENSG00000156482/ENSG00000114767/ENSG00000105372/ENSG00000186468/ENSG00000125445/ENSG00000182810/ENSG00000132341/ENSG00000143947/ENSG00000008988/ENSG00000136942/ENSG00000147604/ENSG00000136271/ENSG00000137818/ENSG00000114391/ENSG00000166197/ENSG00000137154/ENSG00000184967/ENSG00000182899/ENSG00000171863/ENSG00000047056…	NOP56/NIP7/RPL6/RPL21/EBNA1BP2/RPL30/RRP9/RPS19/RPS23/MRPS7/DDX28/RAN/RPS27A/RPS20/RPL35/RPL7/DDX56/RPLP1/RPL24/NOLC1/RPS6/NOC4L/RPL35A/RPS7/WDR37/RPS15/ERAL1/RPSA/RPL23/RPL36/RPL9/RPS3/RPS13/TRMT112/TSR3/RPL13A/MRTO4/PNO1/WDR74/RPL27/RPL26L1/RPL5/RPLP2/RPS12/RPL13/NOP10/RPS9/EXOSC4/ABT1/RPL19/RPLP0/EIF6/RPS16/RPS4X/RPL27A/RPL10/RPL15/RPL34/NHP2/RPS11/RPL32/RPL11/RPL18/RPS26/BUD23/UBA52/RPS3A/RPL…	146	7	ENSG00000047056/ENSG00000165699/ENSG00000164603/ENSG00000171862/ENSG00000121274/ENSG00000171316/ENSG00000213782	139	ENSG00000101361/ENSG00000132603/ENSG00000089009/ENSG00000122026/ENSG00000117395/ENSG00000156482/ENSG00000114767/ENSG00000105372/ENSG00000186468/ENSG00000125445/ENSG00000182810/ENSG00000132341/ENSG00000143947/ENSG00000008988/ENSG00000136942/ENSG00000147604/ENSG00000136271/ENSG00000137818/ENSG00000114391/ENSG00000166197/ENSG00000137154/ENSG00000184967/ENSG00000182899/ENSG00000171863/ENSG00000115268…
BP	GO:0019080	viral gene expression	96/3465	188/14357	9.496e-16	4.96554e-13	ENSG00000185591/ENSG00000089009/ENSG00000122026/ENSG00000156482/ENSG00000165916/ENSG00000105372/ENSG00000186468/ENSG00000154370/ENSG00000143947/ENSG00000008988/ENSG00000136942/ENSG00000147604/ENSG00000137818/ENSG00000114391/ENSG00000048649/ENSG00000137154/ENSG00000182899/ENSG00000171863/ENSG00000115268/ENSG00000168028/ENSG00000125691/ENSG00000130255/ENSG00000163682/ENSG00000149273/ENSG00000110700…	SP1/RPL6/RPL21/RPL30/PSMC3/RPS19/RPS23/TRIM11/RPS27A/RPS20/RPL35/RPL7/RPLP1/RPL24/RSF1/RPS6/RPL35A/RPS7/RPS15/RPSA/RPL23/RPL36/RPL9/RPS3/RPS13/POLR2L/RPL13A/POLR2K/RPL27/RPL5/RPLP2/RPS12/RPL13/RPS9/RPL19/RPLP0/RPS16/RPS4X/RPL27A/RPL10/RPL15/RPL34/RPS11/RPL32/RPL11/RPL18/RPS26/UBA52/RPS3A/POLR2G/RPL8/RPS8/RPL41/RPL7A/NELFE/RPL4/RPS2/RPL18A/RPL10A/RPL37A/RPL39/POLR2C/RPS18/RPL29/USF1/RPS5/RPL38/RPL…	96	14	ENSG00000185591/ENSG00000154370/ENSG00000048649/ENSG00000158773/ENSG00000139496/ENSG00000129315/ENSG00000080561/ENSG00000137709/ENSG00000100393/ENSG00000084093/ENSG00000128016/ENSG00000064995/ENSG00000204977/ENSG00000153922	82	ENSG00000089009/ENSG00000122026/ENSG00000156482/ENSG00000165916/ENSG00000105372/ENSG00000186468/ENSG00000143947/ENSG00000008988/ENSG00000136942/ENSG00000147604/ENSG00000137818/ENSG00000114391/ENSG00000137154/ENSG00000182899/ENSG00000171863/ENSG00000115268/ENSG00000168028/ENSG00000125691/ENSG00000130255/ENSG00000163682/ENSG00000149273/ENSG00000110700/ENSG00000177700/ENSG00000142541/ENSG00000147669…
BP	GO:0000956	nuclear-transcribed mRNA catabolic process	101/3465	206/14357	5.51575e-15	2.64388e-12	ENSG00000265241/ENSG00000134030/ENSG00000089009/ENSG00000122026/ENSG00000156482/ENSG00000105372/ENSG00000186468/ENSG00000159388/ENSG00000143947/ENSG00000008988/ENSG00000136942/ENSG00000162385/ENSG00000147604/ENSG00000138767/ENSG00000137818/ENSG00000114391/ENSG00000137154/ENSG00000161960/ENSG00000182899/ENSG00000171863/ENSG00000115268/ENSG00000168028/ENSG00000125691/ENSG00000130255/ENSG00000163682…	RBM8A/CTIF/RPL6/RPL21/RPL30/RPS19/RPS23/BTG2/RPS27A/RPS20/RPL35/MAGOH/RPL7/CNOT6L/RPLP1/RPL24/RPS6/EIF4A1/RPL35A/RPS7/RPS15/RPSA/RPL23/RPL36/RPL9/RPS3/RPS13/RPL13A/MRTO4/RPL27/RPL5/RPLP2/RPS12/RPL13/RPS9/EXOSC4/RPL19/RPLP0/RPS16/RPS4X/RPL27A/RPL10/RPL15/RPL34/RPS11/RPL32/RPL11/RPL18/RPS26/UBA52/RPS3A/POLR2G/RPL8/RPS8/DCP1A/RPL41/RPL7A/RPL4/RPS2/RPL18A/RPL10A/SAMD4A/RPL37A/LSM4/RPL39/RC3H1/RPS18/R…	101	21	ENSG00000134030/ENSG00000159388/ENSG00000138767/ENSG00000161960/ENSG00000272886/ENSG00000020577/ENSG00000135870/ENSG00000155508/ENSG00000149115/ENSG00000114127/ENSG00000157106/ENSG00000100354/ENSG00000152520/ENSG00000172795/ENSG00000134744/ENSG00000080802/ENSG00000107864/ENSG00000121274/ENSG00000185650/ENSG00000128016/ENSG00000110367	80	ENSG00000265241/ENSG00000089009/ENSG00000122026/ENSG00000156482/ENSG00000105372/ENSG00000186468/ENSG00000143947/ENSG00000008988/ENSG00000136942/ENSG00000162385/ENSG00000147604/ENSG00000137818/ENSG00000114391/ENSG00000137154/ENSG00000182899/ENSG00000171863/ENSG00000115268/ENSG00000168028/ENSG00000125691/ENSG00000130255/ENSG00000163682/ENSG00000149273/ENSG00000110700/ENSG00000142541/ENSG00000053372…
BP	GO:0006413	translational initiation	92/3465	187/14357	6.91961e-14	3.06166e-11	ENSG00000134030/ENSG00000089009/ENSG00000122026/ENSG00000110321/ENSG00000156482/ENSG00000105372/ENSG00000100664/ENSG00000186468/ENSG00000172071/ENSG00000130956/ENSG00000143947/ENSG00000008988/ENSG00000128272/ENSG00000136942/ENSG00000147604/ENSG00000137818/ENSG00000114391/ENSG00000102580/ENSG00000186350/ENSG00000137154/ENSG00000161960/ENSG00000182899/ENSG00000171863/ENSG00000115268/ENSG00000168028…	CTIF/RPL6/RPL21/EIF4G2/RPL30/RPS19/EIF5/RPS23/EIF2AK3/HABP4/RPS27A/RPS20/ATF4/RPL35/RPL7/RPLP1/RPL24/DNAJC3/RXRA/RPS6/EIF4A1/RPL35A/RPS7/RPS15/RPSA/RPL23/RPL36/RPL9/RPS3/RPS13/RPL13A/RPL27/RPL5/RPLP2/RPS12/RPL13/RPS9/RPL19/RPLP0/EIF6/RPS16/RPS4X/RPL27A/RPL10/RPL15/RPL34/NCK1/RPS11/RPL32/FMR1/RPL11/RPL18/RPS26/EIF1/UBA52/RPS3A/EIF3I/POLR2G/RPL8/RPS8/RPL41/RPL7A/PPP1CA/EIF3K/RPL4/RPS2/RPL18A/RPL10A…	92	11	ENSG00000134030/ENSG00000172071/ENSG00000130956/ENSG00000102580/ENSG00000186350/ENSG00000161960/ENSG00000158092/ENSG00000102081/ENSG00000158615/ENSG00000183655/ENSG00000124374	81	ENSG00000089009/ENSG00000122026/ENSG00000110321/ENSG00000156482/ENSG00000105372/ENSG00000100664/ENSG00000186468/ENSG00000143947/ENSG00000008988/ENSG00000128272/ENSG00000136942/ENSG00000147604/ENSG00000137818/ENSG00000114391/ENSG00000137154/ENSG00000182899/ENSG00000171863/ENSG00000115268/ENSG00000168028/ENSG00000125691/ENSG00000130255/ENSG00000163682/ENSG00000149273/ENSG00000110700/ENSG00000142541…
BP	GO:0006612	protein targeting to membrane	87/3465	174/14357	1.01646e-13	4.17621e-11	ENSG00000089009/ENSG00000122026/ENSG00000156482/ENSG00000105372/ENSG00000186468/ENSG00000143947/ENSG00000008988/ENSG00000136942/ENSG00000147604/ENSG00000106803/ENSG00000137818/ENSG00000114391/ENSG00000137154/ENSG00000182899/ENSG00000171863/ENSG00000115268/ENSG00000168028/ENSG00000125691/ENSG00000130255/ENSG00000163682/ENSG00000149273/ENSG00000110700/ENSG00000142541/ENSG00000131469/ENSG00000136247…	RPL6/RPL21/RPL30/RPS19/RPS23/RPS27A/RPS20/RPL35/RPL7/SEC61B/RPLP1/RPL24/RPS6/RPL35A/RPS7/RPS15/RPSA/RPL23/RPL36/RPL9/RPS3/RPS13/RPL13A/RPL27/ZDHHC4/RPL5/RPLP2/RPS12/RPL13/SRP14/RPS9/RPL19/RPLP0/RPS16/RPS4X/RPL27A/RPL10/RPL15/RPL34/RPS11/RPL32/RPL11/RPL18/RPS26/UBA52/RPS3A/CEMIP/RPL8/RPS8/RPL41/RPL7A/CHP1/RAB8B/RPL4/RPS2/RPL18A/RPL10A/RPL37A/RPL39/RPS18/RPL29/RPS5/RPL38/RPL37/RPL3/RPS25/RPS14/RPL2…	87	8	ENSG00000103888/ENSG00000187446/ENSG00000166128/ENSG00000153786/ENSG00000177427/ENSG00000184307/ENSG00000206077/ENSG00000169896	79	ENSG00000089009/ENSG00000122026/ENSG00000156482/ENSG00000105372/ENSG00000186468/ENSG00000143947/ENSG00000008988/ENSG00000136942/ENSG00000147604/ENSG00000106803/ENSG00000137818/ENSG00000114391/ENSG00000137154/ENSG00000182899/ENSG00000171863/ENSG00000115268/ENSG00000168028/ENSG00000125691/ENSG00000130255/ENSG00000163682/ENSG00000149273/ENSG00000110700/ENSG00000142541/ENSG00000131469/ENSG00000136247…
BP	GO:0034470	ncRNA processing	165/3465	410/14357	1.81924e-13	6.97618e-11	ENSG00000101361/ENSG00000141994/ENSG00000166949/ENSG00000168806/ENSG00000166166/ENSG00000089009/ENSG00000122026/ENSG00000117395/ENSG00000156482/ENSG00000114767/ENSG00000105372/ENSG00000196976/ENSG00000186468/ENSG00000185085/ENSG00000143947/ENSG00000008988/ENSG00000136942/ENSG00000147604/ENSG00000136271/ENSG00000137818/ENSG00000114391/ENSG00000166197/ENSG00000137154/ENSG00000126814/ENSG00000184967…	NOP56/DUS3L/SMAD3/LCMT2/TRMT61A/RPL6/RPL21/EBNA1BP2/RPL30/RRP9/RPS19/LAGE3/RPS23/INTS5/RPS27A/RPS20/RPL35/RPL7/DDX56/RPLP1/RPL24/NOLC1/RPS6/TRMT5/NOC4L/RPL35A/TRMT6/RPS7/WDR37/RPS15/ELAC1/RPSA/RPL23/YRDC/RPL36/RPL9/RPS3/RPS13/TRMT112/TSR3/RPL13A/MRTO4/METTL1/PNO1/RPL27/RPL5/RPLP2/RPS12/RPL13/NOP10/RPS9/EXOSC4/ABT1/RPL19/RPLP0/EIF6/TRMT1/RPS16/RPS4X/RPL27A/RPL10/RPL15/RPL34/NHP2/RPS11/RPL32/RPL11/…	165	10	ENSG00000166949/ENSG00000047056/ENSG00000164603/ENSG00000162927/ENSG00000134744/ENSG00000189007/ENSG00000121274/ENSG00000171316/ENSG00000162971/ENSG00000213782	155	ENSG00000101361/ENSG00000141994/ENSG00000168806/ENSG00000166166/ENSG00000089009/ENSG00000122026/ENSG00000117395/ENSG00000156482/ENSG00000114767/ENSG00000105372/ENSG00000196976/ENSG00000186468/ENSG00000185085/ENSG00000143947/ENSG00000008988/ENSG00000136942/ENSG00000147604/ENSG00000136271/ENSG00000137818/ENSG00000114391/ENSG00000166197/ENSG00000137154/ENSG00000126814/ENSG00000184967/ENSG00000182899…
BP	GO:0006119	oxidative phosphorylation	69/3465	129/14357	5.83427e-13	2.09742e-10	ENSG00000108179/ENSG00000198888/ENSG00000090266/ENSG00000164405/ENSG00000198763/ENSG00000147684/ENSG00000198804/ENSG00000172115/ENSG00000154723/ENSG00000116288/ENSG00000198727/ENSG00000124172/ENSG00000147123/ENSG00000189043/ENSG00000145494/ENSG00000198712/ENSG00000168653/ENSG00000159199/ENSG00000241468/ENSG00000131143/ENSG00000164919/ENSG00000111775/ENSG00000184983/ENSG00000176340/ENSG00000099795…	PPIF/MT-ND1/NDUFB2/UQCRQ/MT-ND2/NDUFB9/MT-CO1/CYCS/ATP5PF/PARK7/MT-CYB/ATP5F1E/NDUFB11/NDUFA4/NDUFS6/MT-CO2/NDUFS5/ATP5MC1/ATP5MF/COX4I1/COX6C/COX6A1/NDUFA6/COX8A/NDUFB7/UQCC2/MT-CO3/COX5B/NDUFC2/UQCRH/ATP5PD/NDUFA1/ATP5F1D/NDUFA2/NDUFB10/NDUFB1/NDUFA8/NDUFC1/NDUFA11/ATP5PB/ATP5MC3/NDUFAB1/ATP5ME/CYC1/COX7C/SURF1/MT-ND3/NDUFS4/NDUFB5/UQCR11/NDUFA3/NDUFB4/COX6B1/NDUFB6/UQCR10/COX10/STOML2/NDUFAF1/…	69	4	ENSG00000006695/ENSG00000178127/ENSG00000165240/ENSG00000135537	65	ENSG00000108179/ENSG00000198888/ENSG00000090266/ENSG00000164405/ENSG00000198763/ENSG00000147684/ENSG00000198804/ENSG00000172115/ENSG00000154723/ENSG00000116288/ENSG00000198727/ENSG00000124172/ENSG00000147123/ENSG00000189043/ENSG00000145494/ENSG00000198712/ENSG00000168653/ENSG00000159199/ENSG00000241468/ENSG00000131143/ENSG00000164919/ENSG00000111775/ENSG00000184983/ENSG00000176340/ENSG00000099795…
BP	GO:0022613	ribonucleoprotein complex biogenesis	180/3465	467/14357	1.4056e-12	4.7559e-10	ENSG00000101361/ENSG00000132603/ENSG00000089009/ENSG00000122026/ENSG00000117395/ENSG00000156482/ENSG00000114767/ENSG00000105372/ENSG00000099622/ENSG00000186468/ENSG00000125445/ENSG00000132680/ENSG00000273841/ENSG00000182810/ENSG00000132341/ENSG00000143947/ENSG00000008988/ENSG00000136942/ENSG00000147604/ENSG00000138767/ENSG00000136271/ENSG00000137818/ENSG00000114391/ENSG00000166197/ENSG00000149187…	NOP56/NIP7/RPL6/RPL21/EBNA1BP2/RPL30/RRP9/RPS19/CIRBP/RPS23/MRPS7/KHDC4/TAF9/DDX28/RAN/RPS27A/RPS20/RPL35/RPL7/CNOT6L/DDX56/RPLP1/RPL24/NOLC1/CELF1/LUC7L3/RPS6/NOC4L/RPL35A/RPS7/WDR37/RPS15/TXNL4A/ERAL1/RPSA/RPL23/RPL36/RPL9/RPS3/RPS13/WDR77/SNRPF/TRMT112/TSR3/GRB7/RPL13A/MRTO4/PNO1/WDR74/RPL27/RPL26L1/RPL5/RUVBL1/RPLP2/RPS12/RPL13/NOP10/RPS9/EXOSC4/ABT1/RPL19/RPLP0/ATXN2/EIF6/RPS16/RPS4X/RPL27A/…	180	21	ENSG00000132680/ENSG00000138767/ENSG00000149187/ENSG00000108848/ENSG00000047056/ENSG00000141738/ENSG00000204842/ENSG00000165699/ENSG00000061936/ENSG00000135870/ENSG00000164603/ENSG00000055917/ENSG00000152520/ENSG00000171862/ENSG00000135250/ENSG00000003756/ENSG00000121274/ENSG00000075856/ENSG00000171316/ENSG00000213782/ENSG00000110367	159	ENSG00000101361/ENSG00000132603/ENSG00000089009/ENSG00000122026/ENSG00000117395/ENSG00000156482/ENSG00000114767/ENSG00000105372/ENSG00000099622/ENSG00000186468/ENSG00000125445/ENSG00000273841/ENSG00000182810/ENSG00000132341/ENSG00000143947/ENSG00000008988/ENSG00000136942/ENSG00000147604/ENSG00000136271/ENSG00000137818/ENSG00000114391/ENSG00000166197/ENSG00000137154/ENSG00000184967/ENSG00000182899…
BP	GO:0042775	mitochondrial ATP synthesis coupled electron transport	52/3465	92/14357	2.63111e-11	8.40785e-09	ENSG00000198888/ENSG00000090266/ENSG00000164405/ENSG00000198763/ENSG00000147684/ENSG00000198804/ENSG00000172115/ENSG00000116288/ENSG00000198727/ENSG00000147123/ENSG00000189043/ENSG00000145494/ENSG00000198712/ENSG00000168653/ENSG00000131143/ENSG00000164919/ENSG00000111775/ENSG00000184983/ENSG00000176340/ENSG00000099795/ENSG00000198938/ENSG00000135940/ENSG00000151366/ENSG00000173660/ENSG00000125356…	MT-ND1/NDUFB2/UQCRQ/MT-ND2/NDUFB9/MT-CO1/CYCS/PARK7/MT-CYB/NDUFB11/NDUFA4/NDUFS6/MT-CO2/NDUFS5/COX4I1/COX6C/COX6A1/NDUFA6/COX8A/NDUFB7/MT-CO3/COX5B/NDUFC2/UQCRH/NDUFA1/NDUFA2/NDUFB10/NDUFB1/NDUFA8/NDUFC1/NDUFA11/NDUFAB1/CYC1/COX7C/MT-ND3/NDUFS4/NDUFB5/UQCR11/NDUFA3/NDUFB4/COX6B1/NDUFB6/UQCR10/COX10/NDUFAF1/NDUFB3/UQCC3/NDUFB8/UQCRHL/SDHAF2/NDUFV2/AFG1L	52	3	ENSG00000006695/ENSG00000178127/ENSG00000135537	49	ENSG00000198888/ENSG00000090266/ENSG00000164405/ENSG00000198763/ENSG00000147684/ENSG00000198804/ENSG00000172115/ENSG00000116288/ENSG00000198727/ENSG00000147123/ENSG00000189043/ENSG00000145494/ENSG00000198712/ENSG00000168653/ENSG00000131143/ENSG00000164919/ENSG00000111775/ENSG00000184983/ENSG00000176340/ENSG00000099795/ENSG00000198938/ENSG00000135940/ENSG00000151366/ENSG00000173660/ENSG00000125356…
BP	GO:0042773	ATP synthesis coupled electron transport	52/3465	93/14357	4.575e-11	1.38502e-08	ENSG00000198888/ENSG00000090266/ENSG00000164405/ENSG00000198763/ENSG00000147684/ENSG00000198804/ENSG00000172115/ENSG00000116288/ENSG00000198727/ENSG00000147123/ENSG00000189043/ENSG00000145494/ENSG00000198712/ENSG00000168653/ENSG00000131143/ENSG00000164919/ENSG00000111775/ENSG00000184983/ENSG00000176340/ENSG00000099795/ENSG00000198938/ENSG00000135940/ENSG00000151366/ENSG00000173660/ENSG00000125356…	MT-ND1/NDUFB2/UQCRQ/MT-ND2/NDUFB9/MT-CO1/CYCS/PARK7/MT-CYB/NDUFB11/NDUFA4/NDUFS6/MT-CO2/NDUFS5/COX4I1/COX6C/COX6A1/NDUFA6/COX8A/NDUFB7/MT-CO3/COX5B/NDUFC2/UQCRH/NDUFA1/NDUFA2/NDUFB10/NDUFB1/NDUFA8/NDUFC1/NDUFA11/NDUFAB1/CYC1/COX7C/MT-ND3/NDUFS4/NDUFB5/UQCR11/NDUFA3/NDUFB4/COX6B1/NDUFB6/UQCR10/COX10/NDUFAF1/NDUFB3/UQCC3/NDUFB8/UQCRHL/SDHAF2/NDUFV2/AFG1L	52	3	ENSG00000006695/ENSG00000178127/ENSG00000135537	49	ENSG00000198888/ENSG00000090266/ENSG00000164405/ENSG00000198763/ENSG00000147684/ENSG00000198804/ENSG00000172115/ENSG00000116288/ENSG00000198727/ENSG00000147123/ENSG00000189043/ENSG00000145494/ENSG00000198712/ENSG00000168653/ENSG00000131143/ENSG00000164919/ENSG00000111775/ENSG00000184983/ENSG00000176340/ENSG00000099795/ENSG00000198938/ENSG00000135940/ENSG00000151366/ENSG00000173660/ENSG00000125356…
BP	GO:0006402	mRNA catabolic process	134/3465	336/14357	7.33803e-11	2.11042e-08	ENSG00000172936/ENSG00000265241/ENSG00000134030/ENSG00000089009/ENSG00000122026/ENSG00000156482/ENSG00000165916/ENSG00000105372/ENSG00000099622/ENSG00000186468/ENSG00000159388/ENSG00000073792/ENSG00000143947/ENSG00000008988/ENSG00000136942/ENSG00000162385/ENSG00000147604/ENSG00000138767/ENSG00000137818/ENSG00000114391/ENSG00000137154/ENSG00000013275/ENSG00000161960/ENSG00000182899/ENSG00000171863…	MYD88/RBM8A/CTIF/RPL6/RPL21/RPL30/PSMC3/RPS19/CIRBP/RPS23/BTG2/IGF2BP2/RPS27A/RPS20/RPL35/MAGOH/RPL7/CNOT6L/RPLP1/RPL24/RPS6/PSMC4/EIF4A1/RPL35A/RPS7/RPS15/RPSA/RPL23/PRKCD/PSMB4/PSMC5/RPL36/RPL9/RPS3/PSMA7/RPS13/RPL13A/MRTO4/RPL27/PKP3/RPL5/RPLP2/RPS12/RPL13/PSMB5/YBX1/RPS9/EXOSC4/RPL19/RPLP0/RPS16/GIGYF2/RPS4X/RPL27A/RPL10/PSMB6/RPL15/RPL34/RPS11/RPL32/FMR1/PSMB2/RPL11/RPL18/RPS26/UBA52/RPS3A/P…	134	34	ENSG00000134030/ENSG00000159388/ENSG00000073792/ENSG00000138767/ENSG00000161960/ENSG00000163932/ENSG00000204120/ENSG00000102081/ENSG00000272886/ENSG00000136231/ENSG00000020577/ENSG00000150991/ENSG00000135870/ENSG00000155508/ENSG00000149115/ENSG00000114127/ENSG00000178764/ENSG00000162889/ENSG00000112531/ENSG00000157106/ENSG00000100354/ENSG00000055917/ENSG00000152520/ENSG00000134644/ENSG00000172795…	100	ENSG00000172936/ENSG00000265241/ENSG00000089009/ENSG00000122026/ENSG00000156482/ENSG00000165916/ENSG00000105372/ENSG00000099622/ENSG00000186468/ENSG00000143947/ENSG00000008988/ENSG00000136942/ENSG00000162385/ENSG00000147604/ENSG00000137818/ENSG00000114391/ENSG00000137154/ENSG00000013275/ENSG00000182899/ENSG00000171863/ENSG00000115268/ENSG00000168028/ENSG00000125691/ENSG00000159377/ENSG00000087191…
BP	GO:0006401	RNA catabolic process	142/3465	365/14357	1.58935e-10	4.3533e-08	ENSG00000172936/ENSG00000265241/ENSG00000134030/ENSG00000089009/ENSG00000122026/ENSG00000156482/ENSG00000165916/ENSG00000105372/ENSG00000099622/ENSG00000186468/ENSG00000159388/ENSG00000073792/ENSG00000143947/ENSG00000008988/ENSG00000136942/ENSG00000162385/ENSG00000147604/ENSG00000138767/ENSG00000137818/ENSG00000172922/ENSG00000114391/ENSG00000119705/ENSG00000123144/ENSG00000137154/ENSG00000013275…	MYD88/RBM8A/CTIF/RPL6/RPL21/RPL30/PSMC3/RPS19/CIRBP/RPS23/BTG2/IGF2BP2/RPS27A/RPS20/RPL35/MAGOH/RPL7/CNOT6L/RPLP1/RNASEH2C/RPL24/SLIRP/TRIR/RPS6/PSMC4/EIF4A1/RPL35A/RPS7/RPS15/RPSA/RPL23/PRKCD/PSMB4/PSMC5/RPL36/RPL9/RPS3/PSMA7/RPS13/RPL13A/MRTO4/RPL27/PKP3/RPL5/RPLP2/RPS12/RPL13/PSMB5/YBX1/RPS9/EXOSC4/RPL19/RPLP0/RPS16/GIGYF2/RPS4X/RPL27A/RPL10/PSMB6/RPL15/RPL34/RPS11/RPL32/FMR1/PSMB2/RPL11/RPL18…	142	35	ENSG00000134030/ENSG00000159388/ENSG00000073792/ENSG00000138767/ENSG00000161960/ENSG00000163932/ENSG00000204120/ENSG00000102081/ENSG00000272886/ENSG00000136231/ENSG00000020577/ENSG00000150991/ENSG00000135870/ENSG00000155508/ENSG00000149115/ENSG00000114127/ENSG00000178764/ENSG00000162889/ENSG00000112531/ENSG00000157106/ENSG00000100354/ENSG00000055917/ENSG00000152520/ENSG00000134644/ENSG00000172795…	107	ENSG00000172936/ENSG00000265241/ENSG00000089009/ENSG00000122026/ENSG00000156482/ENSG00000165916/ENSG00000105372/ENSG00000099622/ENSG00000186468/ENSG00000143947/ENSG00000008988/ENSG00000136942/ENSG00000162385/ENSG00000147604/ENSG00000137818/ENSG00000172922/ENSG00000114391/ENSG00000119705/ENSG00000123144/ENSG00000137154/ENSG00000013275/ENSG00000182899/ENSG00000171863/ENSG00000115268/ENSG00000168028…
BP	GO:0002181	cytoplasmic translation	48/3465	86/14357	2.75732e-10	7.20914e-08	ENSG00000132768/ENSG00000089009/ENSG00000156482/ENSG00000186468/ENSG00000008988/ENSG00000147604/ENSG00000137818/ENSG00000114391/ENSG00000182899/ENSG00000171863/ENSG00000130255/ENSG00000163682/ENSG00000149273/ENSG00000142541/ENSG00000053372/ENSG00000037241/ENSG00000177600/ENSG00000108298/ENSG00000089157/ENSG00000166441/ENSG00000174748/ENSG00000158092/ENSG00000144713/ENSG00000102081/ENSG00000142676…	DPH2/RPL6/RPL30/RPS23/RPS20/RPL7/RPLP1/RPL24/RPL35A/RPS7/RPL36/RPL9/RPS3/RPL13A/MRTO4/RPL26L1/RPLP2/RPL19/RPLP0/RPL27A/RPL15/NCK1/RPL32/FMR1/RPL11/RPL18/RPS26/RPS3A/RPL8/RPL41/RPL4/RPL18A/RPL10A/RPL39/RPL7L1/RPL29/RPL38/EIF3D/CPEB2/MCTS1/RPL26/RPL22L1/RPS28/RPS21/RPL22/CPEB3/RPS29/CPEB4	48	6	ENSG00000158092/ENSG00000102081/ENSG00000137449/ENSG00000163584/ENSG00000107864/ENSG00000113742	42	ENSG00000132768/ENSG00000089009/ENSG00000156482/ENSG00000186468/ENSG00000008988/ENSG00000147604/ENSG00000137818/ENSG00000114391/ENSG00000182899/ENSG00000171863/ENSG00000130255/ENSG00000163682/ENSG00000149273/ENSG00000142541/ENSG00000053372/ENSG00000037241/ENSG00000177600/ENSG00000108298/ENSG00000089157/ENSG00000166441/ENSG00000174748/ENSG00000144713/ENSG00000142676/ENSG00000063177/ENSG00000197728…
BP	GO:0022904	respiratory electron transport chain	56/3465	109/14357	6.66753e-10	1.66746e-07	ENSG00000198888/ENSG00000090266/ENSG00000164405/ENSG00000198763/ENSG00000147684/ENSG00000198804/ENSG00000172115/ENSG00000116288/ENSG00000198727/ENSG00000147123/ENSG00000115840/ENSG00000189043/ENSG00000145494/ENSG00000198712/ENSG00000168653/ENSG00000131143/ENSG00000164919/ENSG00000109819/ENSG00000111775/ENSG00000184983/ENSG00000176340/ENSG00000099795/ENSG00000198938/ENSG00000135940/ENSG00000151366…	MT-ND1/NDUFB2/UQCRQ/MT-ND2/NDUFB9/MT-CO1/CYCS/PARK7/MT-CYB/NDUFB11/SLC25A12/NDUFA4/NDUFS6/MT-CO2/NDUFS5/COX4I1/COX6C/PPARGC1A/COX6A1/NDUFA6/COX8A/NDUFB7/MT-CO3/COX5B/NDUFC2/UQCRH/NDUFA1/ETFB/NDUFA2/NDUFB10/NDUFB1/NDUFA8/NDUFC1/NDUFA11/NDUFAB1/CYC1/COX7C/MT-ND3/NDUFS4/NDUFB5/UQCR11/NDUFA3/NDUFB4/COX6B1/NDUFB6/UQCR10/COX10/NDUFAF1/NDUFB3/UQCC3/NDUFB8/UQCRHL/SDHAF2/NDUFV2/AFG1L/GPD1	56	5	ENSG00000115840/ENSG00000109819/ENSG00000006695/ENSG00000178127/ENSG00000135537	51	ENSG00000198888/ENSG00000090266/ENSG00000164405/ENSG00000198763/ENSG00000147684/ENSG00000198804/ENSG00000172115/ENSG00000116288/ENSG00000198727/ENSG00000147123/ENSG00000189043/ENSG00000145494/ENSG00000198712/ENSG00000168653/ENSG00000131143/ENSG00000164919/ENSG00000111775/ENSG00000184983/ENSG00000176340/ENSG00000099795/ENSG00000198938/ENSG00000135940/ENSG00000151366/ENSG00000173660/ENSG00000125356…
BP	GO:0090150	establishment of protein localization to membrane	114/3465	285/14357	1.55985e-09	3.73844e-07	ENSG00000104081/ENSG00000088986/ENSG00000143457/ENSG00000175793/ENSG00000089009/ENSG00000122026/ENSG00000156482/ENSG00000078900/ENSG00000105372/ENSG00000143153/ENSG00000186468/ENSG00000143947/ENSG00000141682/ENSG00000008988/ENSG00000136942/ENSG00000147604/ENSG00000106803/ENSG00000137818/ENSG00000114391/ENSG00000137154/ENSG00000182899/ENSG00000171863/ENSG00000115268/ENSG00000105327/ENSG00000168028…	BMF/DYNLL1/GOLPH3L/SFN/RPL6/RPL21/RPL30/TP73/RPS19/ATP1B1/RPS23/RPS27A/PMAIP1/RPS20/RPL35/RPL7/SEC61B/RPLP1/RPL24/RPS6/RPL35A/RPS7/RPS15/BBC3/RPSA/RPL23/RPL36/RPL9/RPS3/TIMM13/RPS13/RPL13A/RPL27/ZDHHC4/RPL5/RPLP2/RPS12/RPL13/SRP14/RPS9/RPL19/RPLP0/TOMM7/RPS16/RPS4X/RPL27A/RPL10/TP63/RPL15/RPL34/TIMM10/RPS11/KRT18/RPL32/RPL11/RPL18/RPS26/UBA52/RPS3A/CEMIP/RPL8/RPS8/RPL41/RPL7A/CHP1/RAB8B/SPTBN1/RP…	114	24	ENSG00000104081/ENSG00000143457/ENSG00000078900/ENSG00000143153/ENSG00000105327/ENSG00000073282/ENSG00000103888/ENSG00000187446/ENSG00000166128/ENSG00000115306/ENSG00000088808/ENSG00000123983/ENSG00000065308/ENSG00000130779/ENSG00000153786/ENSG00000166900/ENSG00000177427/ENSG00000157764/ENSG00000125149/ENSG00000184307/ENSG00000206077/ENSG00000099365/ENSG00000174483/ENSG00000169896	90	ENSG00000088986/ENSG00000175793/ENSG00000089009/ENSG00000122026/ENSG00000156482/ENSG00000105372/ENSG00000186468/ENSG00000143947/ENSG00000141682/ENSG00000008988/ENSG00000136942/ENSG00000147604/ENSG00000106803/ENSG00000137818/ENSG00000114391/ENSG00000137154/ENSG00000182899/ENSG00000171863/ENSG00000115268/ENSG00000168028/ENSG00000125691/ENSG00000130255/ENSG00000163682/ENSG00000149273/ENSG00000099800…
BP	GO:0006120	mitochondrial electron transport, NADH to ubiquinone	30/3465	51/14357	1.24899e-07	2.87368e-05	ENSG00000198888/ENSG00000090266/ENSG00000198763/ENSG00000147684/ENSG00000116288/ENSG00000147123/ENSG00000189043/ENSG00000145494/ENSG00000168653/ENSG00000184983/ENSG00000099795/ENSG00000151366/ENSG00000125356/ENSG00000131495/ENSG00000140990/ENSG00000183648/ENSG00000119421/ENSG00000109390/ENSG00000174886/ENSG00000004779/ENSG00000198840/ENSG00000164258/ENSG00000136521/ENSG00000170906/ENSG00000065518…	MT-ND1/NDUFB2/MT-ND2/NDUFB9/PARK7/NDUFB11/NDUFA4/NDUFS6/NDUFS5/NDUFA6/NDUFB7/NDUFC2/NDUFA1/NDUFA2/NDUFB10/NDUFB1/NDUFA8/NDUFC1/NDUFA11/NDUFAB1/MT-ND3/NDUFS4/NDUFB5/NDUFA3/NDUFB4/NDUFB6/NDUFAF1/NDUFB3/NDUFB8/NDUFV2	30	1	ENSG00000178127	29	ENSG00000198888/ENSG00000090266/ENSG00000198763/ENSG00000147684/ENSG00000116288/ENSG00000147123/ENSG00000189043/ENSG00000145494/ENSG00000168653/ENSG00000184983/ENSG00000099795/ENSG00000151366/ENSG00000125356/ENSG00000131495/ENSG00000140990/ENSG00000183648/ENSG00000119421/ENSG00000109390/ENSG00000174886/ENSG00000004779/ENSG00000198840/ENSG00000164258/ENSG00000136521/ENSG00000170906/ENSG00000065518…
BP	GO:0000028	ribosomal small subunit assembly	15/3465	18/14357	2.03577e-07	4.50375e-05	ENSG00000105372/ENSG00000125445/ENSG00000115268/ENSG00000132591/ENSG00000168028/ENSG00000146109/ENSG00000189306/ENSG00000083845/ENSG00000172809/ENSG00000164587/ENSG00000181991/ENSG00000177954/ENSG00000233927/ENSG00000185088/ENSG00000241945	RPS19/MRPS7/RPS15/ERAL1/RPSA/ABT1/RRP7A/RPS5/RPL38/RPS14/MRPS11/RPS27/RPS28/RPS27L/PWP2	15	0		15	ENSG00000105372/ENSG00000125445/ENSG00000115268/ENSG00000132591/ENSG00000168028/ENSG00000146109/ENSG00000189306/ENSG00000083845/ENSG00000172809/ENSG00000164587/ENSG00000181991/ENSG00000177954/ENSG00000233927/ENSG00000185088/ENSG00000241945
BP	GO:0022900	electron transport chain	70/3465	168/14357	3.56018e-07	7.5845e-05	ENSG00000198888/ENSG00000090266/ENSG00000164405/ENSG00000198763/ENSG00000147684/ENSG00000198804/ENSG00000172115/ENSG00000116288/ENSG00000112695/ENSG00000198727/ENSG00000147123/ENSG00000115840/ENSG00000189043/ENSG00000145494/ENSG00000198712/ENSG00000168653/ENSG00000131143/ENSG00000164919/ENSG00000109819/ENSG00000111775/ENSG00000051523/ENSG00000184983/ENSG00000176340/ENSG00000099795/ENSG00000198938…	MT-ND1/NDUFB2/UQCRQ/MT-ND2/NDUFB9/MT-CO1/CYCS/PARK7/COX7A2/MT-CYB/NDUFB11/SLC25A12/NDUFA4/NDUFS6/MT-CO2/NDUFS5/COX4I1/COX6C/PPARGC1A/COX6A1/CYBA/NDUFA6/COX8A/NDUFB7/MT-CO3/COX5B/NDUFC2/SH3BGRL3/UQCRH/NDUFA1/ETFB/NDUFA2/NDUFB10/NDUFB1/NDUFA8/NDUFC1/NDUFA11/NDUFAB1/TXNRD1/CYC1/COX7C/AKR1B1/CYB5A/SURF1/MT-ND3/NDUFS4/NDUFB5/UQCR11/AKR7A2/NDUFA3/PHGDH/NDUFB4/COX6B1/TSTA3/NDUFB6/UQCR10/COX10/NDUFAF1/ND…	70	7	ENSG00000115840/ENSG00000109819/ENSG00000198431/ENSG00000006695/ENSG00000162496/ENSG00000178127/ENSG00000135537	63	ENSG00000198888/ENSG00000090266/ENSG00000164405/ENSG00000198763/ENSG00000147684/ENSG00000198804/ENSG00000172115/ENSG00000116288/ENSG00000112695/ENSG00000198727/ENSG00000147123/ENSG00000189043/ENSG00000145494/ENSG00000198712/ENSG00000168653/ENSG00000131143/ENSG00000164919/ENSG00000111775/ENSG00000051523/ENSG00000184983/ENSG00000176340/ENSG00000099795/ENSG00000198938/ENSG00000135940/ENSG00000151366…
BP	GO:0061458	reproductive system development	130/3465	366/14357	4.99683e-07	0.000102649	ENSG00000175592/ENSG00000129194/ENSG00000124216/ENSG00000128564/ENSG00000073756/ENSG00000205213/ENSG00000117139/ENSG00000123131/ENSG00000112972/ENSG00000164442/ENSG00000106571/ENSG00000057657/ENSG00000130726/ENSG00000121858/ENSG00000070404/ENSG00000113739/ENSG00000136943/ENSG00000188910/ENSG00000189280/ENSG00000186350/ENSG00000137075/ENSG00000054267/ENSG00000186792/ENSG00000101109/ENSG00000137154…	FOSL1/SOX15/SNAI1/VGF/PTGS2/LGR4/KDM5B/PRDX4/HMGCS1/CITED2/GLI3/PRDM1/TRIM28/TNFSF10/FSTL3/STC2/CTSV/GJB3/GJB5/RXRA/RNF38/ARID4B/HYAL3/STK4/RPS6/NOTCH1/CBL/SOD1/MEA1/WDR77/AMH/PHLDA2/NDUFS6/PLEKHA5/CSF2/CDKN1B/WNT7B/KLHL26/TMF1/TP63/NUDT1/TIPARP/GGNBP2/SOCS3/RBM15/SPINT1/PTCH1/ARID4A/WDR48/BIK/ARNT/PPARD/OVOL2/FNDC3A/BSG/HES1/FOXO3/EPAS1/SIX4/ERCC1/ZP3/GATA3/LRP6/CST3/VDR/TBX3/RBPJ/ARID5B/FEM1B/S…	130	88	ENSG00000205213/ENSG00000117139/ENSG00000112972/ENSG00000106571/ENSG00000121858/ENSG00000186350/ENSG00000137075/ENSG00000054267/ENSG00000101109/ENSG00000148400/ENSG00000110395/ENSG00000052126/ENSG00000111276/ENSG00000188064/ENSG00000167487/ENSG00000144747/ENSG00000073282/ENSG00000163659/ENSG00000278311/ENSG00000184557/ENSG00000162775/ENSG00000166145/ENSG00000185920/ENSG00000032219/ENSG00000114742…	42	ENSG00000175592/ENSG00000129194/ENSG00000124216/ENSG00000128564/ENSG00000073756/ENSG00000123131/ENSG00000164442/ENSG00000057657/ENSG00000130726/ENSG00000070404/ENSG00000113739/ENSG00000136943/ENSG00000188910/ENSG00000189280/ENSG00000186792/ENSG00000137154/ENSG00000142168/ENSG00000124733/ENSG00000116455/ENSG00000104899/ENSG00000181649/ENSG00000145494/ENSG00000164400/ENSG00000106268/ENSG00000100290…
BP	GO:0042273	ribosomal large subunit biogenesis	36/3465	70/14357	7.09428e-07	0.000140711	ENSG00000132603/ENSG00000089009/ENSG00000117395/ENSG00000182810/ENSG00000136942/ENSG00000147604/ENSG00000114391/ENSG00000182899/ENSG00000047056/ENSG00000053372/ENSG00000133316/ENSG00000037241/ENSG00000122406/ENSG00000242372/ENSG00000147403/ENSG00000145912/ENSG00000142676/ENSG00000174547/ENSG00000148303/ENSG00000198755/ENSG00000146223/ENSG00000172809/ENSG00000067533/ENSG00000100316/ENSG00000122034…	NIP7/RPL6/EBNA1BP2/DDX28/RPL35/RPL7/RPL24/RPL35A/WDR37/MRTO4/WDR74/RPL26L1/RPL5/EIF6/RPL10/NHP2/RPL11/MRPL11/RPL7A/RPL10A/RPL7L1/RPL38/RRP15/RPL3/GTF3A/RPL26/BOP1/NOP16/WDR18/PES1/FTSJ3/RRS1/RPF2/MAK16/PAK1IP1/NWD2	36	1	ENSG00000047056	35	ENSG00000132603/ENSG00000089009/ENSG00000117395/ENSG00000182810/ENSG00000136942/ENSG00000147604/ENSG00000114391/ENSG00000182899/ENSG00000053372/ENSG00000133316/ENSG00000037241/ENSG00000122406/ENSG00000242372/ENSG00000147403/ENSG00000145912/ENSG00000142676/ENSG00000174547/ENSG00000148303/ENSG00000198755/ENSG00000146223/ENSG00000172809/ENSG00000067533/ENSG00000100316/ENSG00000122034/ENSG00000161970…
BP	GO:0048608	reproductive structure development	128/3465	363/14357	9.5258e-07	0.000182641	ENSG00000175592/ENSG00000129194/ENSG00000124216/ENSG00000128564/ENSG00000073756/ENSG00000205213/ENSG00000117139/ENSG00000123131/ENSG00000112972/ENSG00000164442/ENSG00000106571/ENSG00000057657/ENSG00000130726/ENSG00000121858/ENSG00000070404/ENSG00000113739/ENSG00000136943/ENSG00000188910/ENSG00000189280/ENSG00000186350/ENSG00000137075/ENSG00000054267/ENSG00000186792/ENSG00000101109/ENSG00000137154…	FOSL1/SOX15/SNAI1/VGF/PTGS2/LGR4/KDM5B/PRDX4/HMGCS1/CITED2/GLI3/PRDM1/TRIM28/TNFSF10/FSTL3/STC2/CTSV/GJB3/GJB5/RXRA/RNF38/ARID4B/HYAL3/STK4/RPS6/NOTCH1/CBL/SOD1/MEA1/WDR77/AMH/PHLDA2/CSF2/CDKN1B/WNT7B/KLHL26/TMF1/TP63/NUDT1/TIPARP/GGNBP2/SOCS3/RBM15/SPINT1/PTCH1/ARID4A/WDR48/BIK/ARNT/PPARD/OVOL2/FNDC3A/BSG/HES1/FOXO3/EPAS1/SIX4/ERCC1/ZP3/GATA3/LRP6/CST3/VDR/TBX3/RBPJ/ARID5B/FEM1B/SPINT2/STK11/GRH…	128	87	ENSG00000205213/ENSG00000117139/ENSG00000112972/ENSG00000106571/ENSG00000121858/ENSG00000186350/ENSG00000137075/ENSG00000054267/ENSG00000101109/ENSG00000148400/ENSG00000110395/ENSG00000111276/ENSG00000188064/ENSG00000167487/ENSG00000144747/ENSG00000073282/ENSG00000163659/ENSG00000278311/ENSG00000184557/ENSG00000162775/ENSG00000166145/ENSG00000185920/ENSG00000032219/ENSG00000114742/ENSG00000143437…	41	ENSG00000175592/ENSG00000129194/ENSG00000124216/ENSG00000128564/ENSG00000073756/ENSG00000123131/ENSG00000164442/ENSG00000057657/ENSG00000130726/ENSG00000070404/ENSG00000113739/ENSG00000136943/ENSG00000188910/ENSG00000189280/ENSG00000186792/ENSG00000137154/ENSG00000142168/ENSG00000124733/ENSG00000116455/ENSG00000104899/ENSG00000181649/ENSG00000164400/ENSG00000106268/ENSG00000100290/ENSG00000172270…
BP	GO:1903706	regulation of hemopoiesis	136/3465	394/14357	1.67914e-06	0.000311561	ENSG00000108175/ENSG00000185507/ENSG00000204103/ENSG00000198435/ENSG00000101384/ENSG00000106571/ENSG00000165916/ENSG00000057657/ENSG00000078900/ENSG00000121210/ENSG00000070404/ENSG00000120899/ENSG00000143947/ENSG00000169230/ENSG00000254087/ENSG00000118058/ENSG00000119508/ENSG00000239672/ENSG00000135503/ENSG00000055609/ENSG00000100320/ENSG00000143575/ENSG00000148400/ENSG00000163041/ENSG00000013275…	ZMIZ1/IRF7/MAFB/NRARP/JAG1/GLI3/PSMC3/PRDM1/TP73/TMEM131L/FSTL3/PTK2B/RPS27A/PRELID1/LYN/KMT2A/NR4A3/NME1/ACVR1B/KMT2C/RBFOX2/HAX1/NOTCH1/H3F3A/PSMC4/ITCH/NOTCH2/SOD1/PSMB4/PSMC5/PSMA7/TCTA/SIN3A/FBXW7/CSF2/PSMB5/L3MBTL1/HIST1H3B/EIF6/PSMB6/PSMB2/GP1BA/CD46/UBA52/RBM15/FOS/ABL1/DUSP10/ZBTB7B/ARNT/HES1/FOXO3/KMT2D/IRF1/UBC/RC3H1/PAF1/KMT2E/KLF13/GATA3/FOXN1/IL23A/BCL6/SOX13/PSMD8/LDB1/PSMB3/PSME3/…	136	73	ENSG00000108175/ENSG00000101384/ENSG00000106571/ENSG00000078900/ENSG00000121210/ENSG00000120899/ENSG00000254087/ENSG00000118058/ENSG00000135503/ENSG00000055609/ENSG00000100320/ENSG00000148400/ENSG00000078747/ENSG00000134250/ENSG00000169375/ENSG00000109670/ENSG00000185513/ENSG00000185245/ENSG00000117335/ENSG00000162775/ENSG00000170345/ENSG00000097007/ENSG00000143507/ENSG00000160685/ENSG00000143437…	63	ENSG00000185507/ENSG00000204103/ENSG00000198435/ENSG00000165916/ENSG00000057657/ENSG00000070404/ENSG00000143947/ENSG00000169230/ENSG00000119508/ENSG00000239672/ENSG00000143575/ENSG00000163041/ENSG00000013275/ENSG00000142168/ENSG00000159377/ENSG00000087191/ENSG00000101182/ENSG00000145022/ENSG00000164400/ENSG00000100804/ENSG00000274267/ENSG00000242372/ENSG00000142507/ENSG00000126067/ENSG00000221983…
BP	GO:0009205	purine ribonucleoside triphosphate metabolic process	106/3465	292/14357	1.76559e-06	0.000311667	ENSG00000168209/ENSG00000108179/ENSG00000198888/ENSG00000090266/ENSG00000164405/ENSG00000198763/ENSG00000147684/ENSG00000198804/ENSG00000172115/ENSG00000143153/ENSG00000154723/ENSG00000132341/ENSG00000116288/ENSG00000239672/ENSG00000125877/ENSG00000074800/ENSG00000171723/ENSG00000198727/ENSG00000124172/ENSG00000147123/ENSG00000151332/ENSG00000178035/ENSG00000189043/ENSG00000100300/ENSG00000145494…	DDIT4/PPIF/MT-ND1/NDUFB2/UQCRQ/MT-ND2/NDUFB9/MT-CO1/CYCS/ATP1B1/ATP5PF/RAN/PARK7/NME1/ITPA/ENO1/GPHN/MT-CYB/ATP5F1E/NDUFB11/MBIP/IMPDH2/NDUFA4/TSPO/NDUFS6/MT-CO2/NDUFS5/TPI1/ATP5MC1/ATP5MF/COX4I1/COX6C/PPARGC1A/COX6A1/EIF6/NDUFA6/COX8A/NDUFB7/UQCC2/MT-CO3/COX5B/NDUFC2/UQCRH/ATP5PD/PGM2L1/NDUFA1/NME2/ATP5F1D/PKM/PGAM1/ARNT/NDUFA2/NDUFB10/NDUFB1/GUK1/NDUFA8/NDUFC1/NDUFA11/ATP5PB/ATP5MC3/NDUFAB1/ATP…	106	18	ENSG00000168209/ENSG00000143153/ENSG00000171723/ENSG00000151332/ENSG00000109819/ENSG00000165434/ENSG00000143437/ENSG00000186951/ENSG00000139496/ENSG00000006695/ENSG00000100644/ENSG00000114573/ENSG00000171105/ENSG00000178127/ENSG00000165240/ENSG00000116039/ENSG00000181322/ENSG00000135537	88	ENSG00000108179/ENSG00000198888/ENSG00000090266/ENSG00000164405/ENSG00000198763/ENSG00000147684/ENSG00000198804/ENSG00000172115/ENSG00000154723/ENSG00000132341/ENSG00000116288/ENSG00000239672/ENSG00000125877/ENSG00000074800/ENSG00000198727/ENSG00000124172/ENSG00000147123/ENSG00000178035/ENSG00000189043/ENSG00000100300/ENSG00000145494/ENSG00000198712/ENSG00000168653/ENSG00000111669/ENSG00000159199…
BP	GO:0009144	purine nucleoside triphosphate metabolic process	108/3465	299/14357	1.85576e-06	0.000311667	ENSG00000168209/ENSG00000108179/ENSG00000198888/ENSG00000090266/ENSG00000164405/ENSG00000198763/ENSG00000147684/ENSG00000198804/ENSG00000172115/ENSG00000143153/ENSG00000154723/ENSG00000132341/ENSG00000116288/ENSG00000239672/ENSG00000125877/ENSG00000074800/ENSG00000171723/ENSG00000198727/ENSG00000124172/ENSG00000147123/ENSG00000151332/ENSG00000178035/ENSG00000189043/ENSG00000100300/ENSG00000145494…	DDIT4/PPIF/MT-ND1/NDUFB2/UQCRQ/MT-ND2/NDUFB9/MT-CO1/CYCS/ATP1B1/ATP5PF/RAN/PARK7/NME1/ITPA/ENO1/GPHN/MT-CYB/ATP5F1E/NDUFB11/MBIP/IMPDH2/NDUFA4/TSPO/NDUFS6/MT-CO2/NDUFS5/TPI1/ATP5MC1/ATP5MF/COX4I1/COX6C/PPARGC1A/COX6A1/EIF6/NDUFA6/COX8A/NDUFB7/NUDT1/UQCC2/MT-CO3/COX5B/NDUFC2/UQCRH/ATP5PD/PGM2L1/NDUFA1/NME2/ATP5F1D/PKM/PGAM1/ARNT/NDUFA2/NDUFB10/NDUFB1/GUK1/NDUFA8/NDUFC1/NDUFA11/ATP5PB/ATP5MC3/NDUFA…	108	18	ENSG00000168209/ENSG00000143153/ENSG00000171723/ENSG00000151332/ENSG00000109819/ENSG00000165434/ENSG00000143437/ENSG00000186951/ENSG00000139496/ENSG00000006695/ENSG00000100644/ENSG00000114573/ENSG00000171105/ENSG00000178127/ENSG00000165240/ENSG00000116039/ENSG00000181322/ENSG00000135537	90	ENSG00000108179/ENSG00000198888/ENSG00000090266/ENSG00000164405/ENSG00000198763/ENSG00000147684/ENSG00000198804/ENSG00000172115/ENSG00000154723/ENSG00000132341/ENSG00000116288/ENSG00000239672/ENSG00000125877/ENSG00000074800/ENSG00000198727/ENSG00000124172/ENSG00000147123/ENSG00000178035/ENSG00000189043/ENSG00000100300/ENSG00000145494/ENSG00000198712/ENSG00000168653/ENSG00000111669/ENSG00000159199…
BP	GO:0010257	NADH dehydrogenase complex assembly	33/3465	64/14357	1.89645e-06	0.000311667	ENSG00000224877/ENSG00000198888/ENSG00000090266/ENSG00000198763/ENSG00000147684/ENSG00000113845/ENSG00000147123/ENSG00000145494/ENSG00000168653/ENSG00000184983/ENSG00000099795/ENSG00000151366/ENSG00000125356/ENSG00000178057/ENSG00000131495/ENSG00000140990/ENSG00000183648/ENSG00000119421/ENSG00000109390/ENSG00000174886/ENSG00000004779/ENSG00000074582/ENSG00000198840/ENSG00000164258/ENSG00000136521…	NDUFAF8/MT-ND1/NDUFB2/MT-ND2/NDUFB9/TIMMDC1/NDUFB11/NDUFS6/NDUFS5/NDUFA6/NDUFB7/NDUFC2/NDUFA1/NDUFAF3/NDUFA2/NDUFB10/NDUFB1/NDUFA8/NDUFC1/NDUFA11/NDUFAB1/BCS1L/MT-ND3/NDUFS4/NDUFB5/NDUFA3/NDUFB4/ACAD9/NDUFB6/NDUFAF1/NDUFB3/NDUFB8/NDUFV2	33	1	ENSG00000178127	32	ENSG00000224877/ENSG00000198888/ENSG00000090266/ENSG00000198763/ENSG00000147684/ENSG00000113845/ENSG00000147123/ENSG00000145494/ENSG00000168653/ENSG00000184983/ENSG00000099795/ENSG00000151366/ENSG00000125356/ENSG00000178057/ENSG00000131495/ENSG00000140990/ENSG00000183648/ENSG00000119421/ENSG00000109390/ENSG00000174886/ENSG00000004779/ENSG00000074582/ENSG00000198840/ENSG00000164258/ENSG00000136521…
BP	GO:0032981	mitochondrial respiratory chain complex I assembly	33/3465	64/14357	1.89645e-06	0.000311667	ENSG00000224877/ENSG00000198888/ENSG00000090266/ENSG00000198763/ENSG00000147684/ENSG00000113845/ENSG00000147123/ENSG00000145494/ENSG00000168653/ENSG00000184983/ENSG00000099795/ENSG00000151366/ENSG00000125356/ENSG00000178057/ENSG00000131495/ENSG00000140990/ENSG00000183648/ENSG00000119421/ENSG00000109390/ENSG00000174886/ENSG00000004779/ENSG00000074582/ENSG00000198840/ENSG00000164258/ENSG00000136521…	NDUFAF8/MT-ND1/NDUFB2/MT-ND2/NDUFB9/TIMMDC1/NDUFB11/NDUFS6/NDUFS5/NDUFA6/NDUFB7/NDUFC2/NDUFA1/NDUFAF3/NDUFA2/NDUFB10/NDUFB1/NDUFA8/NDUFC1/NDUFA11/NDUFAB1/BCS1L/MT-ND3/NDUFS4/NDUFB5/NDUFA3/NDUFB4/ACAD9/NDUFB6/NDUFAF1/NDUFB3/NDUFB8/NDUFV2	33	1	ENSG00000178127	32	ENSG00000224877/ENSG00000198888/ENSG00000090266/ENSG00000198763/ENSG00000147684/ENSG00000113845/ENSG00000147123/ENSG00000145494/ENSG00000168653/ENSG00000184983/ENSG00000099795/ENSG00000151366/ENSG00000125356/ENSG00000178057/ENSG00000131495/ENSG00000140990/ENSG00000183648/ENSG00000119421/ENSG00000109390/ENSG00000174886/ENSG00000004779/ENSG00000074582/ENSG00000198840/ENSG00000164258/ENSG00000136521…
BP	GO:0009141	nucleoside triphosphate metabolic process	113/3465	318/14357	2.67634e-06	0.000427619	ENSG00000168209/ENSG00000108179/ENSG00000198888/ENSG00000090266/ENSG00000164405/ENSG00000198763/ENSG00000147684/ENSG00000198804/ENSG00000172115/ENSG00000143153/ENSG00000154723/ENSG00000132341/ENSG00000116288/ENSG00000239672/ENSG00000125877/ENSG00000074800/ENSG00000179958/ENSG00000171723/ENSG00000198727/ENSG00000124172/ENSG00000147123/ENSG00000151332/ENSG00000178035/ENSG00000189043/ENSG00000100300…	DDIT4/PPIF/MT-ND1/NDUFB2/UQCRQ/MT-ND2/NDUFB9/MT-CO1/CYCS/ATP1B1/ATP5PF/RAN/PARK7/NME1/ITPA/ENO1/DCTPP1/GPHN/MT-CYB/ATP5F1E/NDUFB11/MBIP/IMPDH2/NDUFA4/TSPO/NDUFS6/MT-CO2/NDUFS5/TPI1/ATP5MC1/ATP5MF/COX4I1/COX6C/DTYMK/PPARGC1A/COX6A1/EIF6/NDUFA6/COX8A/NDUFB7/NUDT1/UQCC2/MT-CO3/COX5B/NDUFC2/UQCRH/ATP5PD/PGM2L1/NDUFA1/NME2/ATP5F1D/PKM/PGAM1/ARNT/NDUFA2/NDUFB10/NDUFB1/GUK1/NDUFA8/NDUFC1/NDUFA11/ATP5PB/…	113	19	ENSG00000168209/ENSG00000143153/ENSG00000171723/ENSG00000151332/ENSG00000109819/ENSG00000165434/ENSG00000143437/ENSG00000186951/ENSG00000139496/ENSG00000006695/ENSG00000100644/ENSG00000114573/ENSG00000028839/ENSG00000171105/ENSG00000178127/ENSG00000165240/ENSG00000116039/ENSG00000181322/ENSG00000135537	94	ENSG00000108179/ENSG00000198888/ENSG00000090266/ENSG00000164405/ENSG00000198763/ENSG00000147684/ENSG00000198804/ENSG00000172115/ENSG00000154723/ENSG00000132341/ENSG00000116288/ENSG00000239672/ENSG00000125877/ENSG00000074800/ENSG00000179958/ENSG00000198727/ENSG00000124172/ENSG00000147123/ENSG00000178035/ENSG00000189043/ENSG00000100300/ENSG00000145494/ENSG00000198712/ENSG00000168653/ENSG00000111669…
BP	GO:0009199	ribonucleoside triphosphate metabolic process	107/3465	298/14357	2.83695e-06	0.000441031	ENSG00000168209/ENSG00000108179/ENSG00000198888/ENSG00000090266/ENSG00000164405/ENSG00000198763/ENSG00000147684/ENSG00000198804/ENSG00000172115/ENSG00000143153/ENSG00000154723/ENSG00000132341/ENSG00000116288/ENSG00000239672/ENSG00000125877/ENSG00000074800/ENSG00000171723/ENSG00000198727/ENSG00000124172/ENSG00000147123/ENSG00000151332/ENSG00000178035/ENSG00000189043/ENSG00000100300/ENSG00000145494…	DDIT4/PPIF/MT-ND1/NDUFB2/UQCRQ/MT-ND2/NDUFB9/MT-CO1/CYCS/ATP1B1/ATP5PF/RAN/PARK7/NME1/ITPA/ENO1/GPHN/MT-CYB/ATP5F1E/NDUFB11/MBIP/IMPDH2/NDUFA4/TSPO/NDUFS6/MT-CO2/NDUFS5/TPI1/ATP5MC1/ATP5MF/COX4I1/COX6C/PPARGC1A/COX6A1/EIF6/NDUFA6/COX8A/NDUFB7/UQCC2/MT-CO3/COX5B/NDUFC2/UQCRH/ATP5PD/PGM2L1/NDUFA1/NME2/ATP5F1D/PKM/PGAM1/ARNT/NDUFA2/NDUFB10/NDUFB1/GUK1/NDUFA8/NDUFC1/NDUFA11/ATP5PB/ATP5MC3/NDUFAB1/ATP…	107	18	ENSG00000168209/ENSG00000143153/ENSG00000171723/ENSG00000151332/ENSG00000109819/ENSG00000165434/ENSG00000143437/ENSG00000186951/ENSG00000139496/ENSG00000006695/ENSG00000100644/ENSG00000114573/ENSG00000171105/ENSG00000178127/ENSG00000165240/ENSG00000116039/ENSG00000181322/ENSG00000135537	89	ENSG00000108179/ENSG00000198888/ENSG00000090266/ENSG00000164405/ENSG00000198763/ENSG00000147684/ENSG00000198804/ENSG00000172115/ENSG00000154723/ENSG00000132341/ENSG00000116288/ENSG00000239672/ENSG00000125877/ENSG00000074800/ENSG00000198727/ENSG00000124172/ENSG00000147123/ENSG00000178035/ENSG00000189043/ENSG00000100300/ENSG00000145494/ENSG00000198712/ENSG00000168653/ENSG00000111669/ENSG00000159199…
BP	GO:0032922	circadian regulation of gene expression	28/3465	52/14357	3.75382e-06	0.00056821	ENSG00000170955/ENSG00000205213/ENSG00000134107/ENSG00000128272/ENSG00000118058/ENSG00000140396/ENSG00000198380/ENSG00000109819/ENSG00000140464/ENSG00000121671/ENSG00000100462/ENSG00000108557/ENSG00000172531/ENSG00000140836/ENSG00000133794/ENSG00000069667/ENSG00000008405/ENSG00000132326/ENSG00000105835/ENSG00000123095/ENSG00000186951/ENSG00000064300/ENSG00000179094/ENSG00000159208/ENSG00000049246…	CAVIN3/LGR4/BHLHE40/ATF4/KMT2A/NCOA2/GFPT1/PPARGC1A/PML/CRY2/PRMT5/RAI1/PPP1CA/ZFHX3/ARNTL/RORA/CRY1/PER2/NAMPT/BHLHE41/PPARA/NGFR/PER1/CIART/PER3/USP2/HNF1B/NRIP1	28	23	ENSG00000205213/ENSG00000134107/ENSG00000118058/ENSG00000140396/ENSG00000198380/ENSG00000109819/ENSG00000140464/ENSG00000121671/ENSG00000108557/ENSG00000140836/ENSG00000133794/ENSG00000069667/ENSG00000008405/ENSG00000132326/ENSG00000105835/ENSG00000123095/ENSG00000186951/ENSG00000064300/ENSG00000179094/ENSG00000159208/ENSG00000049246/ENSG00000036672/ENSG00000180530	5	ENSG00000170955/ENSG00000128272/ENSG00000100462/ENSG00000172531/ENSG00000275410
BP	GO:0042255	ribosome assembly	30/3465	58/14357	5.08082e-06	0.000749356	ENSG00000132603/ENSG00000089009/ENSG00000105372/ENSG00000125445/ENSG00000182810/ENSG00000114391/ENSG00000115268/ENSG00000132591/ENSG00000168028/ENSG00000053372/ENSG00000122406/ENSG00000146109/ENSG00000242372/ENSG00000147403/ENSG00000142676/ENSG00000189306/ENSG00000174547/ENSG00000083845/ENSG00000172809/ENSG00000100316/ENSG00000164587/ENSG00000181991/ENSG00000177954/ENSG00000233927/ENSG00000261236…	NIP7/RPL6/RPS19/MRPS7/DDX28/RPL24/RPS15/ERAL1/RPSA/MRTO4/RPL5/ABT1/EIF6/RPL10/RPL11/RRP7A/MRPL11/RPS5/RPL38/RPL3/RPS14/MRPS11/RPS27/RPS28/BOP1/WDR18/RPS27L/RRS1/RPF2/PWP2	30	0		30	ENSG00000132603/ENSG00000089009/ENSG00000105372/ENSG00000125445/ENSG00000182810/ENSG00000114391/ENSG00000115268/ENSG00000132591/ENSG00000168028/ENSG00000053372/ENSG00000122406/ENSG00000146109/ENSG00000242372/ENSG00000147403/ENSG00000142676/ENSG00000189306/ENSG00000174547/ENSG00000083845/ENSG00000172809/ENSG00000100316/ENSG00000164587/ENSG00000181991/ENSG00000177954/ENSG00000233927/ENSG00000261236…
BP	GO:0045637	regulation of myeloid cell differentiation	81/3465	215/14357	5.77379e-06	0.000830271	ENSG00000185507/ENSG00000204103/ENSG00000101384/ENSG00000070404/ENSG00000120899/ENSG00000254087/ENSG00000118058/ENSG00000119508/ENSG00000239672/ENSG00000135503/ENSG00000055609/ENSG00000100320/ENSG00000143575/ENSG00000163041/ENSG00000134250/ENSG00000145022/ENSG00000169375/ENSG00000109670/ENSG00000164400/ENSG00000185513/ENSG00000274267/ENSG00000242372/ENSG00000185245/ENSG00000162775/ENSG00000170345…	IRF7/MAFB/JAG1/FSTL3/PTK2B/LYN/KMT2A/NR4A3/NME1/ACVR1B/KMT2C/RBFOX2/HAX1/H3F3A/NOTCH2/TCTA/SIN3A/FBXW7/CSF2/L3MBTL1/HIST1H3B/EIF6/GP1BA/RBM15/FOS/ARNT/FOXO3/KMT2D/PAF1/KMT2E/KLF13/IL23A/LDB1/HIST1H3H/TJP2/HIST1H3A/TNRC6B/ITPKB/HOXA9/TRIB1/HIST1H4I/HMGB2/TNRC6A/PIK3R1/TRAF6/HIF1A/PRMT6/CSF3/HIST1H4H/PPARGC1B/JUN/MEIS2/NFE2/MEIS1/INHBA/IL20/EP300/ZFP36L1/ZFP36/HOXA5/HIST1H3C/ACVR2A/CEACAM1/HIST1H3E…	81	42	ENSG00000101384/ENSG00000120899/ENSG00000254087/ENSG00000118058/ENSG00000135503/ENSG00000055609/ENSG00000100320/ENSG00000134250/ENSG00000169375/ENSG00000109670/ENSG00000185513/ENSG00000185245/ENSG00000162775/ENSG00000170345/ENSG00000143437/ENSG00000118689/ENSG00000167548/ENSG00000005483/ENSG00000169926/ENSG00000198728/ENSG00000119139/ENSG00000100354/ENSG00000143772/ENSG00000078399/ENSG00000164104…	39	ENSG00000185507/ENSG00000204103/ENSG00000070404/ENSG00000119508/ENSG00000239672/ENSG00000143575/ENSG00000163041/ENSG00000145022/ENSG00000164400/ENSG00000274267/ENSG00000242372/ENSG00000006712/ENSG00000110944/ENSG00000278828/ENSG00000275714/ENSG00000173334/ENSG00000276180/ENSG00000198890/ENSG00000108342/ENSG00000158406/ENSG00000177606/ENSG00000122641/ENSG00000162891/ENSG00000278272/ENSG00000079385…
BP	GO:1903707	negative regulation of hemopoiesis	51/3465	120/14357	6.76124e-06	0.000948552	ENSG00000204103/ENSG00000198435/ENSG00000106571/ENSG00000121210/ENSG00000070404/ENSG00000120899/ENSG00000254087/ENSG00000239672/ENSG00000148400/ENSG00000145022/ENSG00000109670/ENSG00000162775/ENSG00000160685/ENSG00000114315/ENSG00000125347/ENSG00000135870/ENSG00000006712/ENSG00000169926/ENSG00000113916/ENSG00000198728/ENSG00000119139/ENSG00000143772/ENSG00000078399/ENSG00000173334/ENSG00000276180…	MAFB/NRARP/GLI3/TMEM131L/FSTL3/PTK2B/LYN/NME1/NOTCH1/TCTA/FBXW7/RBM15/ZBTB7B/HES1/IRF1/RC3H1/PAF1/KLF13/BCL6/LDB1/TJP2/ITPKB/HOXA9/TRIB1/HIST1H4I/FOXJ1/PIK3R1/SMAD7/HIST1H4H/MEIS2/MEIS1/INHBA/ZFP36L1/SOCS5/ZFP36/HOXA5/IFNL1/JAK3/CEACAM1/HIST1H4E/HES5/HIST1H4D/FBN1/PGLYRP2/INHA/HIST1H4J/HIST2H4B/MIR221/HIST1H4C/HIST1H4K/LRRC17	51	30	ENSG00000106571/ENSG00000121210/ENSG00000120899/ENSG00000254087/ENSG00000148400/ENSG00000109670/ENSG00000162775/ENSG00000160685/ENSG00000114315/ENSG00000125347/ENSG00000135870/ENSG00000169926/ENSG00000113916/ENSG00000198728/ENSG00000119139/ENSG00000143772/ENSG00000078399/ENSG00000145675/ENSG00000101665/ENSG00000134138/ENSG00000143995/ENSG00000185650/ENSG00000171150/ENSG00000128016/ENSG00000106004…	21	ENSG00000204103/ENSG00000198435/ENSG00000070404/ENSG00000239672/ENSG00000145022/ENSG00000006712/ENSG00000173334/ENSG00000276180/ENSG00000129654/ENSG00000158406/ENSG00000122641/ENSG00000182393/ENSG00000079385/ENSG00000276966/ENSG00000277157/ENSG00000161031/ENSG00000197238/ENSG00000270276/ENSG00000197061/ENSG00000273542/ENSG00000128606
BP	GO:0046034	ATP metabolic process	96/3465	266/14357	7.0717e-06	0.000953854	ENSG00000168209/ENSG00000108179/ENSG00000198888/ENSG00000090266/ENSG00000164405/ENSG00000198763/ENSG00000147684/ENSG00000198804/ENSG00000172115/ENSG00000143153/ENSG00000154723/ENSG00000116288/ENSG00000074800/ENSG00000198727/ENSG00000124172/ENSG00000147123/ENSG00000189043/ENSG00000100300/ENSG00000145494/ENSG00000198712/ENSG00000168653/ENSG00000111669/ENSG00000159199/ENSG00000241468/ENSG00000131143…	DDIT4/PPIF/MT-ND1/NDUFB2/UQCRQ/MT-ND2/NDUFB9/MT-CO1/CYCS/ATP1B1/ATP5PF/PARK7/ENO1/MT-CYB/ATP5F1E/NDUFB11/NDUFA4/TSPO/NDUFS6/MT-CO2/NDUFS5/TPI1/ATP5MC1/ATP5MF/COX4I1/COX6C/PPARGC1A/COX6A1/EIF6/NDUFA6/COX8A/NDUFB7/UQCC2/MT-CO3/COX5B/NDUFC2/UQCRH/ATP5PD/PGM2L1/NDUFA1/ATP5F1D/PKM/PGAM1/ARNT/NDUFA2/NDUFB10/NDUFB1/GUK1/NDUFA8/NDUFC1/NDUFA11/ATP5PB/ATP5MC3/NDUFAB1/ATP5ME/CYC1/COX7C/PGK1/SLC25A25/GAPDH/A…	96	15	ENSG00000168209/ENSG00000143153/ENSG00000109819/ENSG00000165434/ENSG00000143437/ENSG00000186951/ENSG00000139496/ENSG00000006695/ENSG00000100644/ENSG00000114573/ENSG00000171105/ENSG00000178127/ENSG00000165240/ENSG00000116039/ENSG00000135537	81	ENSG00000108179/ENSG00000198888/ENSG00000090266/ENSG00000164405/ENSG00000198763/ENSG00000147684/ENSG00000198804/ENSG00000172115/ENSG00000154723/ENSG00000116288/ENSG00000074800/ENSG00000198727/ENSG00000124172/ENSG00000147123/ENSG00000189043/ENSG00000100300/ENSG00000145494/ENSG00000198712/ENSG00000168653/ENSG00000111669/ENSG00000159199/ENSG00000241468/ENSG00000131143/ENSG00000164919/ENSG00000111775…
BP	GO:0006123	mitochondrial electron transport, cytochrome c to oxygen	14/3465	19/14357	7.29652e-06	0.000953854	ENSG00000198804/ENSG00000172115/ENSG00000189043/ENSG00000198712/ENSG00000131143/ENSG00000164919/ENSG00000111775/ENSG00000176340/ENSG00000198938/ENSG00000135940/ENSG00000127184/ENSG00000126267/ENSG00000006695/ENSG00000135537	MT-CO1/CYCS/NDUFA4/MT-CO2/COX4I1/COX6C/COX6A1/COX8A/MT-CO3/COX5B/COX7C/COX6B1/COX10/AFG1L	14	2	ENSG00000006695/ENSG00000135537	12	ENSG00000198804/ENSG00000172115/ENSG00000189043/ENSG00000198712/ENSG00000131143/ENSG00000164919/ENSG00000111775/ENSG00000176340/ENSG00000198938/ENSG00000135940/ENSG00000127184/ENSG00000126267
BP	GO:0019646	aerobic electron transport chain	14/3465	19/14357	7.29652e-06	0.000953854	ENSG00000198804/ENSG00000172115/ENSG00000189043/ENSG00000198712/ENSG00000131143/ENSG00000164919/ENSG00000111775/ENSG00000176340/ENSG00000198938/ENSG00000135940/ENSG00000127184/ENSG00000126267/ENSG00000006695/ENSG00000135537	MT-CO1/CYCS/NDUFA4/MT-CO2/COX4I1/COX6C/COX6A1/COX8A/MT-CO3/COX5B/COX7C/COX6B1/COX10/AFG1L	14	2	ENSG00000006695/ENSG00000135537	12	ENSG00000198804/ENSG00000172115/ENSG00000189043/ENSG00000198712/ENSG00000131143/ENSG00000164919/ENSG00000111775/ENSG00000176340/ENSG00000198938/ENSG00000135940/ENSG00000127184/ENSG00000126267
BP	GO:0045652	regulation of megakaryocyte differentiation	35/3465	73/14357	7.93162e-06	0.00100795	ENSG00000118058/ENSG00000119508/ENSG00000055609/ENSG00000163041/ENSG00000169375/ENSG00000185513/ENSG00000274267/ENSG00000242372/ENSG00000185245/ENSG00000167548/ENSG00000005483/ENSG00000278828/ENSG00000275714/ENSG00000100354/ENSG00000276180/ENSG00000164104/ENSG00000090905/ENSG00000198890/ENSG00000158406/ENSG00000123405/ENSG00000100393/ENSG00000278272/ENSG00000274750/ENSG00000276966/ENSG00000101335…	KMT2A/NR4A3/KMT2C/H3F3A/SIN3A/L3MBTL1/HIST1H3B/EIF6/GP1BA/KMT2D/KMT2E/HIST1H3H/HIST1H3A/TNRC6B/HIST1H4I/HMGB2/TNRC6A/PRMT6/HIST1H4H/NFE2/EP300/HIST1H3C/HIST1H3E/HIST1H4E/MYL9/ZNF16/HIST2H3D/HIST1H4D/HIST1H3J/HIST1H4J/HIST1H3G/HIST2H4B/HIST1H4C/HIST1H4K/THPO	35	13	ENSG00000118058/ENSG00000055609/ENSG00000169375/ENSG00000185513/ENSG00000185245/ENSG00000167548/ENSG00000005483/ENSG00000100354/ENSG00000164104/ENSG00000090905/ENSG00000123405/ENSG00000100393/ENSG00000170631	22	ENSG00000119508/ENSG00000163041/ENSG00000274267/ENSG00000242372/ENSG00000278828/ENSG00000275714/ENSG00000276180/ENSG00000198890/ENSG00000158406/ENSG00000278272/ENSG00000274750/ENSG00000276966/ENSG00000101335/ENSG00000183598/ENSG00000277157/ENSG00000197153/ENSG00000197238/ENSG00000273983/ENSG00000270276/ENSG00000197061/ENSG00000273542/ENSG00000090534
BP	GO:0035148	tube formation	55/3465	133/14357	8.06081e-06	0.00100795	ENSG00000135960/ENSG00000147050/ENSG00000136848/ENSG00000160007/ENSG00000172757/ENSG00000138802/ENSG00000162738/ENSG00000101109/ENSG00000148400/ENSG00000171863/ENSG00000107882/ENSG00000204138/ENSG00000138771/ENSG00000108518/ENSG00000166145/ENSG00000185920/ENSG00000105991/ENSG00000165699/ENSG00000097007/ENSG00000101752/ENSG00000125850/ENSG00000128567/ENSG00000100625/ENSG00000164741/ENSG00000158813…	EDAR/KDM6A/DAB2IP/ARHGAP35/CFL1/SEC24B/VANGL2/STK4/NOTCH1/RPS7/SUFU/PHACTR4/SHROOM3/PFN1/SPINT1/PTCH1/HOXA1/TSC1/ABL1/MIB1/OVOL2/PODXL/SIX4/DLC1/EDA/GATA3/LRP6/BCL10/ITGB1BP1/SPINT2/GRHL2/SETD2/APAF1/SEMA4C/FZD2/TRAF6/HIF1A/IRX3/ADM/ARID1A/SOX4/IRX1/NFIB/SALL4/TWIST1/GRHL3/HES5/PROX1/TGFB2/WNT5A/FOLR1/SKI/NODAL/PAX8/HNF1B	55	46	ENSG00000135960/ENSG00000147050/ENSG00000136848/ENSG00000160007/ENSG00000138802/ENSG00000162738/ENSG00000101109/ENSG00000148400/ENSG00000107882/ENSG00000204138/ENSG00000138771/ENSG00000166145/ENSG00000185920/ENSG00000105991/ENSG00000165699/ENSG00000097007/ENSG00000101752/ENSG00000125850/ENSG00000128567/ENSG00000100625/ENSG00000164741/ENSG00000158813/ENSG00000107485/ENSG00000070018/ENSG00000142867…	9	ENSG00000172757/ENSG00000171863/ENSG00000108518/ENSG00000119185/ENSG00000167642/ENSG00000170549/ENSG00000110195/ENSG00000125618/ENSG00000275410
BP	GO:0030219	megakaryocyte differentiation	40/3465	89/14357	1.32675e-05	0.00162372	ENSG00000118058/ENSG00000119508/ENSG00000055609/ENSG00000163041/ENSG00000169375/ENSG00000185513/ENSG00000274267/ENSG00000242372/ENSG00000185245/ENSG00000167548/ENSG00000005483/ENSG00000278828/ENSG00000275714/ENSG00000100354/ENSG00000276180/ENSG00000164104/ENSG00000090905/ENSG00000150867/ENSG00000172845/ENSG00000198890/ENSG00000158406/ENSG00000123405/ENSG00000143995/ENSG00000100393/ENSG00000278272…	KMT2A/NR4A3/KMT2C/H3F3A/SIN3A/L3MBTL1/HIST1H3B/EIF6/GP1BA/KMT2D/KMT2E/HIST1H3H/HIST1H3A/TNRC6B/HIST1H4I/HMGB2/TNRC6A/PIP4K2A/SP3/PRMT6/HIST1H4H/NFE2/MEIS1/EP300/HIST1H3C/FLI1/HIST1H3E/VPS33B/HIST1H4E/MYL9/ZNF16/HIST2H3D/HIST1H4D/HIST1H3J/HIST1H4J/HIST1H3G/HIST2H4B/HIST1H4C/HIST1H4K/THPO	40	18	ENSG00000118058/ENSG00000055609/ENSG00000169375/ENSG00000185513/ENSG00000185245/ENSG00000167548/ENSG00000005483/ENSG00000100354/ENSG00000164104/ENSG00000090905/ENSG00000150867/ENSG00000172845/ENSG00000123405/ENSG00000143995/ENSG00000100393/ENSG00000151702/ENSG00000184056/ENSG00000170631	22	ENSG00000119508/ENSG00000163041/ENSG00000274267/ENSG00000242372/ENSG00000278828/ENSG00000275714/ENSG00000276180/ENSG00000198890/ENSG00000158406/ENSG00000278272/ENSG00000274750/ENSG00000276966/ENSG00000101335/ENSG00000183598/ENSG00000277157/ENSG00000197153/ENSG00000197238/ENSG00000273983/ENSG00000270276/ENSG00000197061/ENSG00000273542/ENSG00000090534
BP	GO:0045333	cellular respiration	68/3465	177/14357	1.49596e-05	0.00179266	ENSG00000198888/ENSG00000090266/ENSG00000164405/ENSG00000198763/ENSG00000147684/ENSG00000198804/ENSG00000172115/ENSG00000169230/ENSG00000116288/ENSG00000119508/ENSG00000198727/ENSG00000147123/ENSG00000115840/ENSG00000189043/ENSG00000145494/ENSG00000198712/ENSG00000168653/ENSG00000131143/ENSG00000164919/ENSG00000109819/ENSG00000111775/ENSG00000184983/ENSG00000176340/ENSG00000099795/ENSG00000198938…	MT-ND1/NDUFB2/UQCRQ/MT-ND2/NDUFB9/MT-CO1/CYCS/PRELID1/PARK7/NR4A3/MT-CYB/NDUFB11/SLC25A12/NDUFA4/NDUFS6/MT-CO2/NDUFS5/COX4I1/COX6C/PPARGC1A/COX6A1/NDUFA6/COX8A/NDUFB7/MT-CO3/COX5B/NDUFC2/UQCRH/NDUFA1/ETFB/NDUFA2/NDUFB10/NDUFB1/NDUFA8/NDUFC1/NDUFA11/NDUFAB1/CYC1/COX7C/MDH2/SLC25A25/SURF1/MT-ND3/NDUFS4/NDUFB5/UQCR11/NDUFA3/NDUFB4/COX6B1/NDUFB6/UQCR10/COX10/NDUFAF1/NDUFB3/UQCC3/CISD1/IDH3G/HIF1A/COQ…	68	7	ENSG00000115840/ENSG00000109819/ENSG00000006695/ENSG00000100644/ENSG00000121879/ENSG00000178127/ENSG00000135537	61	ENSG00000198888/ENSG00000090266/ENSG00000164405/ENSG00000198763/ENSG00000147684/ENSG00000198804/ENSG00000172115/ENSG00000169230/ENSG00000116288/ENSG00000119508/ENSG00000198727/ENSG00000147123/ENSG00000189043/ENSG00000145494/ENSG00000198712/ENSG00000168653/ENSG00000131143/ENSG00000164919/ENSG00000111775/ENSG00000184983/ENSG00000176340/ENSG00000099795/ENSG00000198938/ENSG00000135940/ENSG00000151366…
BP	GO:0033108	mitochondrial respiratory chain complex assembly	43/3465	99/14357	1.82415e-05	0.00214133	ENSG00000224877/ENSG00000198888/ENSG00000090266/ENSG00000198763/ENSG00000147684/ENSG00000113845/ENSG00000147123/ENSG00000183978/ENSG00000145494/ENSG00000168653/ENSG00000184983/ENSG00000099795/ENSG00000137288/ENSG00000151366/ENSG00000125356/ENSG00000178057/ENSG00000131495/ENSG00000140990/ENSG00000183648/ENSG00000119421/ENSG00000109390/ENSG00000174886/ENSG00000004779/ENSG00000074582/ENSG00000148290…	NDUFAF8/MT-ND1/NDUFB2/MT-ND2/NDUFB9/TIMMDC1/NDUFB11/COA3/NDUFS6/NDUFS5/NDUFA6/NDUFB7/UQCC2/NDUFC2/NDUFA1/NDUFAF3/NDUFA2/NDUFB10/NDUFB1/NDUFA8/NDUFC1/NDUFA11/NDUFAB1/BCS1L/SURF1/MT-ND3/NDUFS4/NDUFB5/NDUFA3/NDUFB4/ACAD9/NDUFB6/UQCR10/NDUFAF1/NDUFB3/UQCC3/COX17/COA4/NDUFB8/SDHAF2/NDUFV2/SMIM20/SLC25A33	43	1	ENSG00000178127	42	ENSG00000224877/ENSG00000198888/ENSG00000090266/ENSG00000198763/ENSG00000147684/ENSG00000113845/ENSG00000147123/ENSG00000183978/ENSG00000145494/ENSG00000168653/ENSG00000184983/ENSG00000099795/ENSG00000137288/ENSG00000151366/ENSG00000125356/ENSG00000178057/ENSG00000131495/ENSG00000140990/ENSG00000183648/ENSG00000119421/ENSG00000109390/ENSG00000174886/ENSG00000004779/ENSG00000074582/ENSG00000148290…
BP	GO:0003183	mitral valve morphogenesis	9/3465	10/14357	2.1588e-05	0.00248348	ENSG00000148400/ENSG00000115170/ENSG00000169242/ENSG00000107779/ENSG00000137834/ENSG00000204217/ENSG00000124766/ENSG00000122691/ENSG00000166341	NOTCH1/ACVR1/EFNA1/BMPR1A/SMAD6/BMPR2/SOX4/TWIST1/DCHS1	9	8	ENSG00000148400/ENSG00000115170/ENSG00000169242/ENSG00000107779/ENSG00000137834/ENSG00000204217/ENSG00000124766/ENSG00000122691	1	ENSG00000166341
BP	GO:0003281	ventricular septum development	29/3465	59/14357	2.58729e-05	0.00291806	ENSG00000173706/ENSG00000164442/ENSG00000057657/ENSG00000162738/ENSG00000148400/ENSG00000107882/ENSG00000115170/ENSG00000162775/ENSG00000114315/ENSG00000107485/ENSG00000135111/ENSG00000137834/ENSG00000180340/ENSG00000101665/ENSG00000204217/ENSG00000166225/ENSG00000163513/ENSG00000124766/ENSG00000164683/ENSG00000101115/ENSG00000117707/ENSG00000069702/ENSG00000092969/ENSG00000114251/ENSG00000215417…	HEG1/CITED2/PRDM1/VANGL2/NOTCH1/SUFU/ACVR1/RBM15/HES1/GATA3/TBX3/SMAD6/FZD2/SMAD7/BMPR2/FRS2/TGFBR2/SOX4/HEY1/SALL4/PROX1/TGFBR3/TGFB2/WNT5A/MIR17HG/HEY2/PAX8/SALL1/WNT11	29	24	ENSG00000173706/ENSG00000162738/ENSG00000148400/ENSG00000107882/ENSG00000115170/ENSG00000162775/ENSG00000114315/ENSG00000107485/ENSG00000137834/ENSG00000180340/ENSG00000101665/ENSG00000204217/ENSG00000166225/ENSG00000163513/ENSG00000124766/ENSG00000164683/ENSG00000101115/ENSG00000117707/ENSG00000069702/ENSG00000092969/ENSG00000114251/ENSG00000135547/ENSG00000103449/ENSG00000085741	5	ENSG00000164442/ENSG00000057657/ENSG00000135111/ENSG00000215417/ENSG00000125618
BP	GO:0048511	rhythmic process	84/3465	233/14357	2.69623e-05	0.00298245	ENSG00000117318/ENSG00000081913/ENSG00000170955/ENSG00000169136/ENSG00000205213/ENSG00000167074/ENSG00000185591/ENSG00000117139/ENSG00000116560/ENSG00000179388/ENSG00000119138/ENSG00000134107/ENSG00000082701/ENSG00000128272/ENSG00000118058/ENSG00000140396/ENSG00000178035/ENSG00000104899/ENSG00000169375/ENSG00000165030/ENSG00000156052/ENSG00000164400/ENSG00000198380/ENSG00000135446/ENSG00000109819…	ID3/PHLPP1/CAVIN3/ATF5/LGR4/TEF/SP1/KDM5B/SFPQ/EGR3/KLF9/BHLHE40/GSK3B/ATF4/KMT2A/NCOA2/IMPDH2/AMH/SIN3A/NFIL3/GNAQ/CSF2/GFPT1/CDK4/PPARGC1A/PML/CRY2/SREBF1/TOP2A/EGR1/FBXW11/PRMT5/RAI1/PPP1CA/ZFHX3/DYRK1A/GPR157/FOXO3/ARNTL/RORA/CRY1/ZP3/PER2/CST3/NAMPT/BHLHE41/BTRC/CDK5/PPARA/PTEN/HS3ST2/DBP/BTBD9/ADAMTS1/CASP2/ID1/NGFR/SRC/NFYA/ADNP/JUN/INHBA/SIK1/EP300/PER1/TYMS/BMPR1B/NR1D2/CLDN4/DRD4/CIART/…	84	62	ENSG00000117318/ENSG00000081913/ENSG00000205213/ENSG00000167074/ENSG00000185591/ENSG00000117139/ENSG00000119138/ENSG00000134107/ENSG00000082701/ENSG00000118058/ENSG00000140396/ENSG00000169375/ENSG00000165030/ENSG00000156052/ENSG00000198380/ENSG00000109819/ENSG00000140464/ENSG00000121671/ENSG00000072310/ENSG00000131747/ENSG00000120738/ENSG00000072803/ENSG00000108557/ENSG00000140836/ENSG00000157540…	22	ENSG00000170955/ENSG00000169136/ENSG00000116560/ENSG00000179388/ENSG00000128272/ENSG00000178035/ENSG00000104899/ENSG00000164400/ENSG00000135446/ENSG00000100462/ENSG00000172531/ENSG00000188372/ENSG00000101439/ENSG00000164885/ENSG00000122254/ENSG00000154734/ENSG00000177606/ENSG00000122641/ENSG00000176890/ENSG00000189143/ENSG00000275410/ENSG00000105509
BP	GO:0060412	ventricular septum morphogenesis	20/3465	35/14357	2.90213e-05	0.00312227	ENSG00000164442/ENSG00000162738/ENSG00000148400/ENSG00000115170/ENSG00000162775/ENSG00000114315/ENSG00000135111/ENSG00000180340/ENSG00000101665/ENSG00000204217/ENSG00000163513/ENSG00000124766/ENSG00000164683/ENSG00000117707/ENSG00000069702/ENSG00000092969/ENSG00000114251/ENSG00000215417/ENSG00000135547/ENSG00000085741	CITED2/VANGL2/NOTCH1/ACVR1/RBM15/HES1/TBX3/FZD2/SMAD7/BMPR2/TGFBR2/SOX4/HEY1/PROX1/TGFBR3/TGFB2/WNT5A/MIR17HG/HEY2/WNT11	20	17	ENSG00000162738/ENSG00000148400/ENSG00000115170/ENSG00000162775/ENSG00000114315/ENSG00000180340/ENSG00000101665/ENSG00000204217/ENSG00000163513/ENSG00000124766/ENSG00000164683/ENSG00000117707/ENSG00000069702/ENSG00000092969/ENSG00000114251/ENSG00000135547/ENSG00000085741	3	ENSG00000164442/ENSG00000135111/ENSG00000215417
BP	GO:0043410	positive regulation of MAPK cascade	150/3465	464/14357	2.96064e-05	0.00312227	ENSG00000136244/ENSG00000115009/ENSG00000118523/ENSG00000170955/ENSG00000135960/ENSG00000182580/ENSG00000107984/ENSG00000170776/ENSG00000141441/ENSG00000065361/ENSG00000113161/ENSG00000177283/ENSG00000078900/ENSG00000136848/ENSG00000140443/ENSG00000067182/ENSG00000006432/ENSG00000120899/ENSG00000162738/ENSG00000143947/ENSG00000241484/ENSG00000078401/ENSG00000110514/ENSG00000141068/ENSG00000101109…	IL6/CCL20/CTGF/CAVIN3/EDAR/EPHB3/DKK1/AKAP13/GAREM1/ERBB3/HMGCR/FZD8/TP73/DAB2IP/IGF1R/TNFRSF1A/MAP3K9/PTK2B/VANGL2/RPS27A/ARHGAP8/EDN1/MADD/KSR1/STK4/NOTCH1/MAP3K8/MAP3K3/MAP3K5/NOTCH2/DUSP6/SOD1/MINK1/FGD2/RPS3/TNFRSF10D/MAP3K1/TIAM1/MET/FBXW7/WNT7B/MAP3K14/INAVA/LPAR3/UBA52/CCL22/EFNA1/PHB/ABL1/FGFR3/NELFE/WWC1/TNIK/NDST1/IL1B/MAP3K21/UBC/PTPN1/MAP2K7/LMTK2/NOD1/IRAK1/NENF/MID1/MAP3K2/MARCO/CS…	150	111	ENSG00000135960/ENSG00000182580/ENSG00000170776/ENSG00000141441/ENSG00000065361/ENSG00000113161/ENSG00000078900/ENSG00000136848/ENSG00000140443/ENSG00000067182/ENSG00000006432/ENSG00000120899/ENSG00000162738/ENSG00000241484/ENSG00000110514/ENSG00000141068/ENSG00000101109/ENSG00000148400/ENSG00000107968/ENSG00000198909/ENSG00000197442/ENSG00000134250/ENSG00000141503/ENSG00000095015/ENSG00000156299…	39	ENSG00000136244/ENSG00000115009/ENSG00000118523/ENSG00000170955/ENSG00000107984/ENSG00000177283/ENSG00000143947/ENSG00000078401/ENSG00000139318/ENSG00000142168/ENSG00000146192/ENSG00000149273/ENSG00000173530/ENSG00000221983/ENSG00000167085/ENSG00000204356/ENSG00000125538/ENSG00000184216/ENSG00000117691/ENSG00000019169/ENSG00000129474/ENSG00000116717/ENSG00000143556/ENSG00000177606/ENSG00000187796…
BP	GO:0043009	chordate embryonic development	160/3465	500/14357	2.99059e-05	0.00312227	ENSG00000175592/ENSG00000163435/ENSG00000108175/ENSG00000173706/ENSG00000124216/ENSG00000124813/ENSG00000107984/ENSG00000166949/ENSG00000198435/ENSG00000182197/ENSG00000106571/ENSG00000147050/ENSG00000120549/ENSG00000165916/ENSG00000057657/ENSG00000130726/ENSG00000160007/ENSG00000143816/ENSG00000172757/ENSG00000138802/ENSG00000188910/ENSG00000162738/ENSG00000078401/ENSG00000189280/ENSG00000166197…	FOSL1/ELF3/ZMIZ1/HEG1/SNAI1/RUNX2/DKK1/SMAD3/NRARP/EXT1/GLI3/KDM6A/KIAA1217/PSMC3/PRDM1/TRIM28/ARHGAP35/WNT9A/CFL1/SEC24B/GJB3/VANGL2/EDN1/GJB5/NOLC1/ACVR1B/RXRA/STK4/LATS2/NOTCH1/PSMC4/RPS7/GNA13/SUFU/HINFP/ADAM10/SIN3A/PHLDA2/PHACTR4/CSF2/ENDOG/WNT7B/TFAP2A/YBX1/SHROOM3/TAF8/ACVR1/SEC24D/ZFAND5/DAD1/PFN1/SF3B6/GGNBP2/SOCS3/SPINT1/RRP7A/BTF3/PTCH1/HOXA1/TSC1/BMPR1A/ABL1/MIB1/COL4A3BP/ARNT/NDST1/…	160	111	ENSG00000163435/ENSG00000108175/ENSG00000173706/ENSG00000124813/ENSG00000166949/ENSG00000182197/ENSG00000106571/ENSG00000147050/ENSG00000120549/ENSG00000160007/ENSG00000143816/ENSG00000138802/ENSG00000162738/ENSG00000135503/ENSG00000186350/ENSG00000101109/ENSG00000150457/ENSG00000148400/ENSG00000120063/ENSG00000107882/ENSG00000172273/ENSG00000137845/ENSG00000169375/ENSG00000204138/ENSG00000188064…	49	ENSG00000175592/ENSG00000124216/ENSG00000107984/ENSG00000198435/ENSG00000165916/ENSG00000057657/ENSG00000130726/ENSG00000172757/ENSG00000188910/ENSG00000078401/ENSG00000189280/ENSG00000166197/ENSG00000013275/ENSG00000171863/ENSG00000181649/ENSG00000164400/ENSG00000167136/ENSG00000065978/ENSG00000129562/ENSG00000108518/ENSG00000115128/ENSG00000189306/ENSG00000145741/ENSG00000146223/ENSG00000254999…
BP	GO:0007623	circadian rhythm	63/3465	164/14357	3.03977e-05	0.00312227	ENSG00000117318/ENSG00000081913/ENSG00000170955/ENSG00000169136/ENSG00000205213/ENSG00000116560/ENSG00000179388/ENSG00000119138/ENSG00000134107/ENSG00000082701/ENSG00000128272/ENSG00000118058/ENSG00000140396/ENSG00000178035/ENSG00000169375/ENSG00000165030/ENSG00000156052/ENSG00000164400/ENSG00000198380/ENSG00000135446/ENSG00000109819/ENSG00000140464/ENSG00000121671/ENSG00000072310/ENSG00000131747…	ID3/PHLPP1/CAVIN3/ATF5/LGR4/SFPQ/EGR3/KLF9/BHLHE40/GSK3B/ATF4/KMT2A/NCOA2/IMPDH2/SIN3A/NFIL3/GNAQ/CSF2/GFPT1/CDK4/PPARGC1A/PML/CRY2/SREBF1/TOP2A/FBXW11/PRMT5/RAI1/PPP1CA/ZFHX3/DYRK1A/GPR157/ARNTL/RORA/CRY1/PER2/CST3/NAMPT/BHLHE41/BTRC/PPARA/PTEN/HS3ST2/DBP/BTBD9/ID1/NGFR/JUN/SIK1/EP300/PER1/TYMS/NR1D2/CLDN4/DRD4/CIART/CIPC/PER3/USP2/PROX1/HNF1B/NRIP1/RORB	63	47	ENSG00000117318/ENSG00000081913/ENSG00000205213/ENSG00000119138/ENSG00000134107/ENSG00000082701/ENSG00000118058/ENSG00000140396/ENSG00000169375/ENSG00000165030/ENSG00000156052/ENSG00000198380/ENSG00000109819/ENSG00000140464/ENSG00000121671/ENSG00000072310/ENSG00000131747/ENSG00000072803/ENSG00000108557/ENSG00000140836/ENSG00000157540/ENSG00000180758/ENSG00000133794/ENSG00000069667/ENSG00000008405…	16	ENSG00000170955/ENSG00000169136/ENSG00000116560/ENSG00000179388/ENSG00000128272/ENSG00000178035/ENSG00000164400/ENSG00000135446/ENSG00000100462/ENSG00000172531/ENSG00000101439/ENSG00000122254/ENSG00000177606/ENSG00000176890/ENSG00000189143/ENSG00000275410
BP	GO:1902600	proton transmembrane transport	53/3465	132/14357	3.12652e-05	0.00315504	ENSG00000108179/ENSG00000198804/ENSG00000154723/ENSG00000116288/ENSG00000112695/ENSG00000124172/ENSG00000189043/ENSG00000198712/ENSG00000159199/ENSG00000241468/ENSG00000131143/ENSG00000164919/ENSG00000111775/ENSG00000176340/ENSG00000065923/ENSG00000198938/ENSG00000135940/ENSG00000167863/ENSG00000187446/ENSG00000119899/ENSG00000099624/ENSG00000198689/ENSG00000167700/ENSG00000116459/ENSG00000154518…	PPIF/MT-CO1/ATP5PF/PARK7/COX7A2/ATP5F1E/NDUFA4/MT-CO2/ATP5MC1/ATP5MF/COX4I1/COX6C/COX6A1/COX8A/SLC9A7/MT-CO3/COX5B/ATP5PD/CHP1/SLC17A5/ATP5F1D/SLC9A6/MFSD3/ATP5PB/ATP5MC3/ATP5ME/CYC1/COX7C/CYB5A/SLC2A12/SURF1/ATP6V0B/ATP6V1F/COX6B1/COX10/STOML2/COX17/ATP5MC2/NDUFA4L2/ATP5MG/ATP6V1A/SLC33A1/DRD4/ATP6V0C/ATP6V0D2/TWIST1/ATP7A/ATP6V1C2/ATP6V1B1/C15orf48/ATP12A/UCP3/SLC9A4	53	15	ENSG00000065923/ENSG00000187446/ENSG00000119899/ENSG00000198689/ENSG00000146411/ENSG00000006695/ENSG00000114573/ENSG00000169359/ENSG00000069696/ENSG00000147614/ENSG00000122691/ENSG00000165240/ENSG00000143882/ENSG00000116039/ENSG00000075673	38	ENSG00000108179/ENSG00000198804/ENSG00000154723/ENSG00000116288/ENSG00000112695/ENSG00000124172/ENSG00000189043/ENSG00000198712/ENSG00000159199/ENSG00000241468/ENSG00000131143/ENSG00000164919/ENSG00000111775/ENSG00000176340/ENSG00000198938/ENSG00000135940/ENSG00000167863/ENSG00000099624/ENSG00000167700/ENSG00000116459/ENSG00000154518/ENSG00000169020/ENSG00000179091/ENSG00000127184/ENSG00000166347…
BP	GO:0002009	morphogenesis of an epithelium	154/3465	480/14357	3.61375e-05	0.00358384	ENSG00000124216/ENSG00000198742/ENSG00000107984/ENSG00000205213/ENSG00000143878/ENSG00000166949/ENSG00000113070/ENSG00000198435/ENSG00000117139/ENSG00000133816/ENSG00000101384/ENSG00000106571/ENSG00000147050/ENSG00000165916/ENSG00000130726/ENSG00000160007/ENSG00000172757/ENSG00000138802/ENSG00000136943/ENSG00000124782/ENSG00000125848/ENSG00000162738/ENSG00000143947/ENSG00000078401/ENSG00000186350…	SNAI1/SMURF1/DKK1/LGR4/RHOB/SMAD3/HBEGF/NRARP/KDM5B/MICAL2/JAG1/GLI3/KDM6A/PSMC3/TRIM28/ARHGAP35/CFL1/SEC24B/CTSV/RREB1/FLRT3/VANGL2/RPS27A/EDN1/RXRA/DAAM1/STK4/NOTCH1/ARHGAP12/PSMC4/RPS7/GNA13/SUFU/PSMB4/PSMC5/RIPK4/PSMA7/PHACTR4/TIAM1/MET/WNT7B/PSMB5/TFAP2A/DAG1/SHROOM3/PML/ACVR1/TP63/PSMB6/PFN1/PSMB2/UBA52/SOCS3/RBM15/SPINT1/PTCH1/TSC1/ABL1/PPP1CA/CLASP1/MIB1/PRKX/OVOL2/HES1/CD151/UBC/PODXL/SI…	154	103	ENSG00000198742/ENSG00000205213/ENSG00000166949/ENSG00000117139/ENSG00000133816/ENSG00000101384/ENSG00000106571/ENSG00000147050/ENSG00000160007/ENSG00000138802/ENSG00000124782/ENSG00000162738/ENSG00000186350/ENSG00000100592/ENSG00000101109/ENSG00000148400/ENSG00000165322/ENSG00000120063/ENSG00000107882/ENSG00000183421/ENSG00000204138/ENSG00000156299/ENSG00000105976/ENSG00000188064/ENSG00000137203…	51	ENSG00000124216/ENSG00000107984/ENSG00000143878/ENSG00000113070/ENSG00000198435/ENSG00000165916/ENSG00000130726/ENSG00000172757/ENSG00000136943/ENSG00000125848/ENSG00000143947/ENSG00000078401/ENSG00000013275/ENSG00000171863/ENSG00000159377/ENSG00000087191/ENSG00000101182/ENSG00000100804/ENSG00000142507/ENSG00000108518/ENSG00000126067/ENSG00000221983/ENSG00000172531/ENSG00000177697/ENSG00000128422…
BP	GO:0045814	negative regulation of gene expression, epigenetic	48/3465	117/14357	3.78604e-05	0.00369107	ENSG00000188486/ENSG00000008083/ENSG00000164032/ENSG00000130726/ENSG00000137504/ENSG00000076108/ENSG00000163041/ENSG00000169375/ENSG00000274267/ENSG00000197724/ENSG00000198160/ENSG00000139154/ENSG00000093009/ENSG00000266074/ENSG00000143033/ENSG00000167548/ENSG00000119772/ENSG00000277075/ENSG00000172943/ENSG00000128708/ENSG00000278828/ENSG00000275714/ENSG00000276180/ENSG00000140320/ENSG00000088305…	H2AFX/JARID2/H2AFZ/TRIM28/CREBZF/BAZ2A/H3F3A/SIN3A/HIST1H3B/PHF2/MIER1/AEBP2/CDC45/BAHCC1/MTF2/KMT2D/DNMT3A/HIST1H2AE/PHF8/HAT1/HIST1H3H/HIST1H3A/HIST1H4I/BAHD1/DNMT3B/HIST1H4H/ATAD2B/ARID1A/HIST1H2AG/HIST1H2AI/HIST1H3C/HIST2H2AA4/HIST1H3E/HIST1H4E/HIST2H3D/HIST1H4D/HIST2H2AA3/HIST2H2AC/HIST1H3J/HIST1H4J/HIST1H2AH/HIST1H3G/HIST2H4B/HIST1H4C/HIST1H2AL/HIST1H4K/MSL3P1/HIST1H2AB	48	17	ENSG00000008083/ENSG00000137504/ENSG00000076108/ENSG00000169375/ENSG00000197724/ENSG00000198160/ENSG00000139154/ENSG00000266074/ENSG00000143033/ENSG00000167548/ENSG00000119772/ENSG00000172943/ENSG00000140320/ENSG00000088305/ENSG00000119778/ENSG00000117713/ENSG00000224287	31	ENSG00000188486/ENSG00000164032/ENSG00000130726/ENSG00000163041/ENSG00000274267/ENSG00000093009/ENSG00000277075/ENSG00000128708/ENSG00000278828/ENSG00000275714/ENSG00000276180/ENSG00000158406/ENSG00000196787/ENSG00000196747/ENSG00000278272/ENSG00000272196/ENSG00000274750/ENSG00000276966/ENSG00000183598/ENSG00000277157/ENSG00000203812/ENSG00000184260/ENSG00000197153/ENSG00000197238/ENSG00000274997…
BP	GO:0006342	chromatin silencing	43/3465	102/14357	4.37659e-05	0.00415458	ENSG00000188486/ENSG00000164032/ENSG00000130726/ENSG00000076108/ENSG00000163041/ENSG00000169375/ENSG00000274267/ENSG00000197724/ENSG00000198160/ENSG00000093009/ENSG00000266074/ENSG00000167548/ENSG00000119772/ENSG00000277075/ENSG00000172943/ENSG00000128708/ENSG00000278828/ENSG00000275714/ENSG00000276180/ENSG00000140320/ENSG00000158406/ENSG00000119778/ENSG00000117713/ENSG00000196787/ENSG00000196747…	H2AFX/H2AFZ/TRIM28/BAZ2A/H3F3A/SIN3A/HIST1H3B/PHF2/MIER1/CDC45/BAHCC1/KMT2D/DNMT3A/HIST1H2AE/PHF8/HAT1/HIST1H3H/HIST1H3A/HIST1H4I/BAHD1/HIST1H4H/ATAD2B/ARID1A/HIST1H2AG/HIST1H2AI/HIST1H3C/HIST2H2AA4/HIST1H3E/HIST1H4E/HIST2H3D/HIST1H4D/HIST2H2AA3/HIST2H2AC/HIST1H3J/HIST1H4J/HIST1H2AH/HIST1H3G/HIST2H4B/HIST1H4C/HIST1H2AL/HIST1H4K/MSL3P1/HIST1H2AB	43	12	ENSG00000076108/ENSG00000169375/ENSG00000197724/ENSG00000198160/ENSG00000266074/ENSG00000167548/ENSG00000119772/ENSG00000172943/ENSG00000140320/ENSG00000119778/ENSG00000117713/ENSG00000224287	31	ENSG00000188486/ENSG00000164032/ENSG00000130726/ENSG00000163041/ENSG00000274267/ENSG00000093009/ENSG00000277075/ENSG00000128708/ENSG00000278828/ENSG00000275714/ENSG00000276180/ENSG00000158406/ENSG00000196787/ENSG00000196747/ENSG00000278272/ENSG00000272196/ENSG00000274750/ENSG00000276966/ENSG00000183598/ENSG00000277157/ENSG00000203812/ENSG00000184260/ENSG00000197153/ENSG00000197238/ENSG00000274997…
BP	GO:0042776	mitochondrial ATP synthesis coupled proton transport	14/3465	21/14357	4.40593e-05	0.00415458	ENSG00000154723/ENSG00000124172/ENSG00000159199/ENSG00000241468/ENSG00000135940/ENSG00000167863/ENSG00000099624/ENSG00000116459/ENSG00000154518/ENSG00000169020/ENSG00000179091/ENSG00000165283/ENSG00000135390/ENSG00000167283	ATP5PF/ATP5F1E/ATP5MC1/ATP5MF/COX5B/ATP5PD/ATP5F1D/ATP5PB/ATP5MC3/ATP5ME/CYC1/STOML2/ATP5MC2/ATP5MG	14	0		14	ENSG00000154723/ENSG00000124172/ENSG00000159199/ENSG00000241468/ENSG00000135940/ENSG00000167863/ENSG00000099624/ENSG00000116459/ENSG00000154518/ENSG00000169020/ENSG00000179091/ENSG00000165283/ENSG00000135390/ENSG00000167283
BP	GO:0019730	antimicrobial humoral response	33/3465	72/14357	4.54922e-05	0.0042205	ENSG00000124107/ENSG00000156482/ENSG00000165799/ENSG00000184678/ENSG00000105372/ENSG00000125995/ENSG00000148346/ENSG00000198918/ENSG00000167754/ENSG00000111640/ENSG00000120509/ENSG00000136695/ENSG00000273802/ENSG00000177556/ENSG00000197903/ENSG00000124102/ENSG00000120885/ENSG00000143556/ENSG00000163220/ENSG00000018280/ENSG00000069399/ENSG00000124875/ENSG00000143546/ENSG00000274290/ENSG00000163221…	SLPI/RPL30/RNASE7/HIST2H2BE/RPS19/ROMO1/LCN2/RPL39/KLK5/GAPDH/PDZD11/IL36RN/HIST1H2BG/ATOX1/HIST1H2BK/PI3/CLU/S100A7/S100A9/SLC11A1/BCL3/CXCL6/S100A8/HIST1H2BE/S100A12/ATP7A/PGLYRP2/HIST1H2BI/HIST1H2BJ/DEFB1/EPPIN/SFTPD/SEMG1	33	3	ENSG00000069399/ENSG00000165240/ENSG00000124635	30	ENSG00000124107/ENSG00000156482/ENSG00000165799/ENSG00000184678/ENSG00000105372/ENSG00000125995/ENSG00000148346/ENSG00000198918/ENSG00000167754/ENSG00000111640/ENSG00000120509/ENSG00000136695/ENSG00000273802/ENSG00000177556/ENSG00000197903/ENSG00000124102/ENSG00000120885/ENSG00000143556/ENSG00000163220/ENSG00000018280/ENSG00000124875/ENSG00000143546/ENSG00000274290/ENSG00000163221/ENSG00000161031…
BP	GO:0001838	embryonic epithelial tube formation	46/3465	112/14357	5.26718e-05	0.00480902	ENSG00000147050/ENSG00000160007/ENSG00000172757/ENSG00000138802/ENSG00000162738/ENSG00000101109/ENSG00000171863/ENSG00000107882/ENSG00000204138/ENSG00000138771/ENSG00000108518/ENSG00000166145/ENSG00000185920/ENSG00000165699/ENSG00000097007/ENSG00000101752/ENSG00000125850/ENSG00000100625/ENSG00000164741/ENSG00000107485/ENSG00000070018/ENSG00000142867/ENSG00000167642/ENSG00000083307/ENSG00000181555…	KDM6A/ARHGAP35/CFL1/SEC24B/VANGL2/STK4/RPS7/SUFU/PHACTR4/SHROOM3/PFN1/SPINT1/PTCH1/TSC1/ABL1/MIB1/OVOL2/SIX4/DLC1/GATA3/LRP6/BCL10/SPINT2/GRHL2/SETD2/APAF1/SEMA4C/FZD2/TRAF6/HIF1A/IRX3/ADM/ARID1A/SOX4/IRX1/SALL4/TWIST1/GRHL3/HES5/TGFB2/WNT5A/FOLR1/SKI/NODAL/PAX8/HNF1B	46	38	ENSG00000147050/ENSG00000160007/ENSG00000138802/ENSG00000162738/ENSG00000101109/ENSG00000107882/ENSG00000204138/ENSG00000138771/ENSG00000166145/ENSG00000185920/ENSG00000165699/ENSG00000097007/ENSG00000101752/ENSG00000125850/ENSG00000100625/ENSG00000164741/ENSG00000107485/ENSG00000070018/ENSG00000142867/ENSG00000083307/ENSG00000181555/ENSG00000120868/ENSG00000168758/ENSG00000180340/ENSG00000175104…	8	ENSG00000172757/ENSG00000171863/ENSG00000108518/ENSG00000167642/ENSG00000170549/ENSG00000110195/ENSG00000125618/ENSG00000275410
BP	GO:0015980	energy derivation by oxidation of organic compounds	89/3465	254/14357	5.37701e-05	0.00483259	ENSG00000170955/ENSG00000198888/ENSG00000090266/ENSG00000164405/ENSG00000198763/ENSG00000147684/ENSG00000198804/ENSG00000172115/ENSG00000198668/ENSG00000082701/ENSG00000143947/ENSG00000169230/ENSG00000116288/ENSG00000119508/ENSG00000198727/ENSG00000147123/ENSG00000115840/ENSG00000189043/ENSG00000181649/ENSG00000145494/ENSG00000198712/ENSG00000168653/ENSG00000198380/ENSG00000131143/ENSG00000164919…	CAVIN3/MT-ND1/NDUFB2/UQCRQ/MT-ND2/NDUFB9/MT-CO1/CYCS/CALM1/GSK3B/RPS27A/PRELID1/PARK7/NR4A3/MT-CYB/NDUFB11/SLC25A12/NDUFA4/PHLDA2/NDUFS6/MT-CO2/NDUFS5/GFPT1/COX4I1/COX6C/PPARGC1A/COX6A1/NDUFA6/COX8A/NHLRC1/NDUFB7/UBA52/MT-CO3/COX5B/NDUFC2/UQCRH/PPP1CA/STK40/PGM2L1/NDUFA1/ETFB/NDUFA2/NDUFB10/NDUFB1/UBC/NDUFA8/NDUFC1/NDUFA11/NDUFAB1/PER2/CYC1/COX7C/MDH2/SLC25A25/SURF1/MT-ND3/NDUFS4/NDUFB5/UQCR11/PY…	89	18	ENSG00000082701/ENSG00000115840/ENSG00000198380/ENSG00000109819/ENSG00000196182/ENSG00000165434/ENSG00000150991/ENSG00000132326/ENSG00000006695/ENSG00000023287/ENSG00000100644/ENSG00000121879/ENSG00000171105/ENSG00000178127/ENSG00000127334/ENSG00000095637/ENSG00000135537/ENSG00000173281	71	ENSG00000170955/ENSG00000198888/ENSG00000090266/ENSG00000164405/ENSG00000198763/ENSG00000147684/ENSG00000198804/ENSG00000172115/ENSG00000198668/ENSG00000143947/ENSG00000169230/ENSG00000116288/ENSG00000119508/ENSG00000198727/ENSG00000147123/ENSG00000189043/ENSG00000181649/ENSG00000145494/ENSG00000198712/ENSG00000168653/ENSG00000131143/ENSG00000164919/ENSG00000111775/ENSG00000184983/ENSG00000176340…
BP	GO:0003181	atrioventricular valve morphogenesis	13/3465	19/14357	5.54744e-05	0.00485382	ENSG00000148400/ENSG00000115170/ENSG00000169242/ENSG00000107779/ENSG00000137834/ENSG00000204217/ENSG00000163513/ENSG00000124766/ENSG00000164683/ENSG00000122691/ENSG00000166341/ENSG00000092969/ENSG00000135547	NOTCH1/ACVR1/EFNA1/BMPR1A/SMAD6/BMPR2/TGFBR2/SOX4/HEY1/TWIST1/DCHS1/TGFB2/HEY2	13	12	ENSG00000148400/ENSG00000115170/ENSG00000169242/ENSG00000107779/ENSG00000137834/ENSG00000204217/ENSG00000163513/ENSG00000124766/ENSG00000164683/ENSG00000122691/ENSG00000092969/ENSG00000135547	1	ENSG00000166341
BP	GO:0019216	regulation of lipid metabolic process	108/3465	320/14357	5.5694e-05	0.00485382	ENSG00000118523/ENSG00000140465/ENSG00000186480/ENSG00000124216/ENSG00000073756/ENSG00000156671/ENSG00000126775/ENSG00000185591/ENSG00000134215/ENSG00000146072/ENSG00000165175/ENSG00000112972/ENSG00000113161/ENSG00000136848/ENSG00000130164/ENSG00000067182/ENSG00000120899/ENSG00000012660/ENSG00000132341/ENSG00000108389/ENSG00000254087/ENSG00000119508/ENSG00000164211/ENSG00000186350/ENSG00000163344…	CTGF/CYP1A1/INSIG1/SNAI1/PTGS2/SAMD8/ATG14/SP1/VAV3/TNFRSF21/MID1IP1/HMGCS1/HMGCR/DAB2IP/LDLR/TNFRSF1A/PTK2B/ELOVL5/RAN/MTMR4/LYN/NR4A3/STARD4/RXRA/PMVK/NCOA2/EDF1/INSIG2/PRKAB2/SOD1/PRKCD/SIN3A/TSPO/GRHL1/MVK/FBXW7/CDK4/PPARGC1A/PIK3IP1/EIF6/SREBF1/EGR1/FGFR3/CHD9/PPARD/IL1B/ACSL3/RORA/ADIPOR2/ORMDL2/AMBRA1/TM7SF2/ZP3/TXNRD1/VDR/SNAI2/PDP2/IGFBP7/FASN/CNEP1R1/STK11/RBL2/PDP1/PPARA/STOML2/MTMR3/R…	108	81	ENSG00000140465/ENSG00000186480/ENSG00000156671/ENSG00000126775/ENSG00000185591/ENSG00000134215/ENSG00000146072/ENSG00000165175/ENSG00000112972/ENSG00000113161/ENSG00000136848/ENSG00000130164/ENSG00000067182/ENSG00000120899/ENSG00000012660/ENSG00000108389/ENSG00000254087/ENSG00000164211/ENSG00000186350/ENSG00000140396/ENSG00000125629/ENSG00000131791/ENSG00000163932/ENSG00000169375/ENSG00000134317…	27	ENSG00000118523/ENSG00000124216/ENSG00000073756/ENSG00000132341/ENSG00000119508/ENSG00000163344/ENSG00000107223/ENSG00000142168/ENSG00000100300/ENSG00000135446/ENSG00000242372/ENSG00000125538/ENSG00000123353/ENSG00000149809/ENSG00000188372/ENSG00000019549/ENSG00000163453/ENSG00000165283/ENSG00000135587/ENSG00000117054/ENSG00000130203/ENSG00000067992/ENSG00000079385/ENSG00000164850/ENSG00000204624…
BP	GO:0072175	epithelial tube formation	48/3465	119/14357	6.31564e-05	0.00542203	ENSG00000147050/ENSG00000160007/ENSG00000172757/ENSG00000138802/ENSG00000162738/ENSG00000101109/ENSG00000171863/ENSG00000107882/ENSG00000204138/ENSG00000138771/ENSG00000108518/ENSG00000166145/ENSG00000185920/ENSG00000165699/ENSG00000097007/ENSG00000101752/ENSG00000125850/ENSG00000128567/ENSG00000100625/ENSG00000164741/ENSG00000107485/ENSG00000070018/ENSG00000142867/ENSG00000167642/ENSG00000083307…	KDM6A/ARHGAP35/CFL1/SEC24B/VANGL2/STK4/RPS7/SUFU/PHACTR4/SHROOM3/PFN1/SPINT1/PTCH1/TSC1/ABL1/MIB1/OVOL2/PODXL/SIX4/DLC1/GATA3/LRP6/BCL10/SPINT2/GRHL2/SETD2/APAF1/SEMA4C/FZD2/TRAF6/HIF1A/IRX3/ADM/ARID1A/SOX4/IRX1/SALL4/TWIST1/GRHL3/HES5/PROX1/TGFB2/WNT5A/FOLR1/SKI/NODAL/PAX8/HNF1B	48	40	ENSG00000147050/ENSG00000160007/ENSG00000138802/ENSG00000162738/ENSG00000101109/ENSG00000107882/ENSG00000204138/ENSG00000138771/ENSG00000166145/ENSG00000185920/ENSG00000165699/ENSG00000097007/ENSG00000101752/ENSG00000125850/ENSG00000128567/ENSG00000100625/ENSG00000164741/ENSG00000107485/ENSG00000070018/ENSG00000142867/ENSG00000083307/ENSG00000181555/ENSG00000120868/ENSG00000168758/ENSG00000180340…	8	ENSG00000172757/ENSG00000171863/ENSG00000108518/ENSG00000167642/ENSG00000170549/ENSG00000110195/ENSG00000125618/ENSG00000275410
BP	GO:0006605	protein targeting	130/3465	399/14357	6.63791e-05	0.00561489	ENSG00000198742/ENSG00000089009/ENSG00000122026/ENSG00000156482/ENSG00000148154/ENSG00000198258/ENSG00000182606/ENSG00000150779/ENSG00000105372/ENSG00000186468/ENSG00000109519/ENSG00000143947/ENSG00000008988/ENSG00000136942/ENSG00000147604/ENSG00000106803/ENSG00000137818/ENSG00000114391/ENSG00000143575/ENSG00000137154/ENSG00000182899/ENSG00000171863/ENSG00000115268/ENSG00000168028/ENSG00000125691…	SMURF1/RPL6/RPL21/RPL30/UGCG/UBL5/TRAK1/TIMM8B/RPS19/RPS23/GRPEL1/RPS27A/RPS20/RPL35/RPL7/SEC61B/RPLP1/RPL24/HAX1/RPS6/RPL35A/RPS7/RPS15/RPSA/RPL23/RPL36/RPL9/RPS3/TIMM13/RPS13/RPL13A/TSPO/RPL27/ZDHHC4/CYB5R1/RPL5/RUVBL1/FBXW7/RPLP2/RPS12/RPL13/SRP14/RPS9/RPL19/RPLP0/PEX13/CDC37/TOMM7/RPS16/RPS4X/RPL27A/RPL10/SREBF1/RPL15/RPL34/TIMM10/RPS11/RPL32/RPL11/RPL18/PEX14/RPS26/UBA52/RPS3A/CEMIP/RPL8/RPS…	130	26	ENSG00000198742/ENSG00000148154/ENSG00000182606/ENSG00000109670/ENSG00000162928/ENSG00000072310/ENSG00000142655/ENSG00000103888/ENSG00000187446/ENSG00000166128/ENSG00000114315/ENSG00000152520/ENSG00000153786/ENSG00000213463/ENSG00000129003/ENSG00000177427/ENSG00000154174/ENSG00000184307/ENSG00000156735/ENSG00000135968/ENSG00000206077/ENSG00000143387/ENSG00000104497/ENSG00000169896/ENSG00000179841…	104	ENSG00000089009/ENSG00000122026/ENSG00000156482/ENSG00000198258/ENSG00000150779/ENSG00000105372/ENSG00000186468/ENSG00000109519/ENSG00000143947/ENSG00000008988/ENSG00000136942/ENSG00000147604/ENSG00000106803/ENSG00000137818/ENSG00000114391/ENSG00000143575/ENSG00000137154/ENSG00000182899/ENSG00000171863/ENSG00000115268/ENSG00000168028/ENSG00000125691/ENSG00000130255/ENSG00000163682/ENSG00000149273…
BP	GO:0001763	morphogenesis of a branching structure	63/3465	168/14357	7.06096e-05	0.00588618	ENSG00000205213/ENSG00000198435/ENSG00000117139/ENSG00000106571/ENSG00000057657/ENSG00000162738/ENSG00000078401/ENSG00000186350/ENSG00000101109/ENSG00000148400/ENSG00000120063/ENSG00000105976/ENSG00000173402/ENSG00000140464/ENSG00000115170/ENSG00000073282/ENSG00000184557/ENSG00000119866/ENSG00000162775/ENSG00000166145/ENSG00000185920/ENSG00000097007/ENSG00000172531/ENSG00000100625/ENSG00000070018…	LGR4/NRARP/KDM5B/GLI3/PRDM1/VANGL2/EDN1/RXRA/STK4/NOTCH1/GNA13/MET/DAG1/PML/ACVR1/TP63/SOCS3/BCL11A/RBM15/SPINT1/PTCH1/ABL1/PPP1CA/SIX4/LRP6/VDR/TBX3/FOXD1/CTSH/SNAI2/PBX1/FEM1B/SPINT2/BTRC/RERE/GRHL2/NKX3-1/KRAS/SETD2/TACSTD2/SEMA3A/DLX2/SRC/BTBD7/SEMA3C/WNT2B/AREG/ENG/ADM/FRS2/TGFBR2/HOXA5/LHX1/PROX1/HOXA11/DCHS1/WNT5A/DLL4/PAX8/SPRY1/SALL1/HNF1B/GLI2	63	45	ENSG00000205213/ENSG00000117139/ENSG00000106571/ENSG00000162738/ENSG00000186350/ENSG00000101109/ENSG00000148400/ENSG00000120063/ENSG00000105976/ENSG00000173402/ENSG00000140464/ENSG00000115170/ENSG00000073282/ENSG00000184557/ENSG00000119866/ENSG00000162775/ENSG00000166145/ENSG00000185920/ENSG00000097007/ENSG00000100625/ENSG00000070018/ENSG00000111424/ENSG00000185630/ENSG00000169018/ENSG00000166167…	18	ENSG00000198435/ENSG00000057657/ENSG00000078401/ENSG00000172531/ENSG00000135111/ENSG00000251493/ENSG00000103811/ENSG00000019549/ENSG00000167642/ENSG00000167034/ENSG00000184292/ENSG00000115844/ENSG00000109321/ENSG00000005073/ENSG00000166341/ENSG00000128917/ENSG00000125618/ENSG00000275410
BP	GO:0048568	embryonic organ development	119/3465	361/14357	7.64365e-05	0.0062809	ENSG00000117318/ENSG00000186480/ENSG00000124216/ENSG00000124813/ENSG00000204103/ENSG00000166949/ENSG00000133816/ENSG00000164442/ENSG00000106571/ENSG00000147050/ENSG00000057657/ENSG00000130726/ENSG00000169429/ENSG00000143816/ENSG00000138802/ENSG00000162738/ENSG00000078401/ENSG00000189280/ENSG00000118058/ENSG00000119508/ENSG00000101109/ENSG00000148400/ENSG00000107882/ENSG00000125629/ENSG00000142168…	ID3/INSIG1/SNAI1/RUNX2/MAFB/SMAD3/MICAL2/CITED2/GLI3/KDM6A/PRDM1/TRIM28/CXCL8/WNT9A/SEC24B/VANGL2/EDN1/GJB5/KMT2A/NR4A3/STK4/NOTCH1/SUFU/INSIG2/SOD1/PHLDA2/PHACTR4/CSF2/WNT7B/TFAP2A/ACVR1/RPL10/TEAD1/GGNBP2/SOCS3/SPINT1/PTCH1/HOXA1/EFNA1/BMPR1A/WDR48/MIB1/ARNT/NDST1/OVOL2/HES1/EPAS1/SIX4/RPL38/ERCC1/GATA3/LRP6/TBX3/RBPJ/EPHB2/TBC1D23/TEAD3/PBX1/SPINT2/GRHL2/HIPK1/KRT8/SETD2/NIPBL/SH2B3/FZD2/WDR60…	119	91	ENSG00000117318/ENSG00000186480/ENSG00000124813/ENSG00000166949/ENSG00000133816/ENSG00000106571/ENSG00000147050/ENSG00000143816/ENSG00000138802/ENSG00000162738/ENSG00000118058/ENSG00000101109/ENSG00000148400/ENSG00000107882/ENSG00000125629/ENSG00000204138/ENSG00000188064/ENSG00000137203/ENSG00000115170/ENSG00000187079/ENSG00000278311/ENSG00000184557/ENSG00000166145/ENSG00000185920/ENSG00000105991…	28	ENSG00000124216/ENSG00000204103/ENSG00000164442/ENSG00000057657/ENSG00000130726/ENSG00000169429/ENSG00000078401/ENSG00000189280/ENSG00000119508/ENSG00000142168/ENSG00000181649/ENSG00000164400/ENSG00000147403/ENSG00000172809/ENSG00000012061/ENSG00000135111/ENSG00000167642/ENSG00000170421/ENSG00000115844/ENSG00000141873/ENSG00000129749/ENSG00000143570/ENSG00000005073/ENSG00000110195/ENSG00000125618…
BP	GO:1905314	semi-lunar valve development	11/3465	15/14357	8.07605e-05	0.00654274	ENSG00000101384/ENSG00000148400/ENSG00000134250/ENSG00000169242/ENSG00000107485/ENSG00000137834/ENSG00000204217/ENSG00000164683/ENSG00000122691/ENSG00000092969/ENSG00000135547	JAG1/NOTCH1/NOTCH2/EFNA1/GATA3/SMAD6/BMPR2/HEY1/TWIST1/TGFB2/HEY2	11	11	ENSG00000101384/ENSG00000148400/ENSG00000134250/ENSG00000169242/ENSG00000107485/ENSG00000137834/ENSG00000204217/ENSG00000164683/ENSG00000122691/ENSG00000092969/ENSG00000135547	0
BP	GO:0060562	epithelial tube morphogenesis	96/3465	281/14357	8.43785e-05	0.00670529	ENSG00000205213/ENSG00000143878/ENSG00000166949/ENSG00000198435/ENSG00000117139/ENSG00000133816/ENSG00000106571/ENSG00000147050/ENSG00000160007/ENSG00000172757/ENSG00000138802/ENSG00000162738/ENSG00000078401/ENSG00000101109/ENSG00000148400/ENSG00000171863/ENSG00000120063/ENSG00000107882/ENSG00000204138/ENSG00000105976/ENSG00000173402/ENSG00000138771/ENSG00000140464/ENSG00000115170/ENSG00000108518…	LGR4/RHOB/SMAD3/NRARP/KDM5B/MICAL2/GLI3/KDM6A/ARHGAP35/CFL1/SEC24B/VANGL2/EDN1/STK4/NOTCH1/RPS7/GNA13/SUFU/PHACTR4/MET/DAG1/SHROOM3/PML/ACVR1/PFN1/RBM15/SPINT1/PTCH1/TSC1/ABL1/PPP1CA/MIB1/PRKX/OVOL2/HES1/PODXL/SIX4/DLC1/GATA3/LRP6/VDR/BCL10/TBX3/FOXD1/CTSH/RBPJ/PBX1/SPINT2/BTRC/GRHL2/NKX3-1/KRAS/SETD2/APAF1/TACSTD2/SEMA4C/FZD2/EFNB2/TRAF6/STARD13/SRC/MTSS1/HIF1A/WNT2B/IRX3/AREG/ENG/ADM/ARID1A/TGF…	96	72	ENSG00000205213/ENSG00000166949/ENSG00000117139/ENSG00000133816/ENSG00000106571/ENSG00000147050/ENSG00000160007/ENSG00000138802/ENSG00000162738/ENSG00000101109/ENSG00000148400/ENSG00000120063/ENSG00000107882/ENSG00000204138/ENSG00000105976/ENSG00000173402/ENSG00000138771/ENSG00000140464/ENSG00000115170/ENSG00000162775/ENSG00000166145/ENSG00000185920/ENSG00000165699/ENSG00000097007/ENSG00000101752…	24	ENSG00000143878/ENSG00000198435/ENSG00000172757/ENSG00000078401/ENSG00000171863/ENSG00000108518/ENSG00000172531/ENSG00000135111/ENSG00000251493/ENSG00000103811/ENSG00000167642/ENSG00000167034/ENSG00000184292/ENSG00000125266/ENSG00000109321/ENSG00000170549/ENSG00000005073/ENSG00000166341/ENSG00000110195/ENSG00000128917/ENSG00000125618/ENSG00000126562/ENSG00000275410/ENSG00000169245
BP	GO:0000183	chromatin silencing at rDNA	20/3465	37/14357	8.50985e-05	0.00670529	ENSG00000076108/ENSG00000163041/ENSG00000274267/ENSG00000197724/ENSG00000172943/ENSG00000278828/ENSG00000275714/ENSG00000276180/ENSG00000158406/ENSG00000278272/ENSG00000274750/ENSG00000276966/ENSG00000183598/ENSG00000277157/ENSG00000197153/ENSG00000197238/ENSG00000273983/ENSG00000270276/ENSG00000197061/ENSG00000273542	BAZ2A/H3F3A/HIST1H3B/PHF2/PHF8/HIST1H3H/HIST1H3A/HIST1H4I/HIST1H4H/HIST1H3C/HIST1H3E/HIST1H4E/HIST2H3D/HIST1H4D/HIST1H3J/HIST1H4J/HIST1H3G/HIST2H4B/HIST1H4C/HIST1H4K	20	3	ENSG00000076108/ENSG00000197724/ENSG00000172943	17	ENSG00000163041/ENSG00000274267/ENSG00000278828/ENSG00000275714/ENSG00000276180/ENSG00000158406/ENSG00000278272/ENSG00000274750/ENSG00000276966/ENSG00000183598/ENSG00000277157/ENSG00000197153/ENSG00000197238/ENSG00000273983/ENSG00000270276/ENSG00000197061/ENSG00000273542
BP	GO:0045638	negative regulation of myeloid cell differentiation	34/3465	77/14357	8.91411e-05	0.00692891	ENSG00000204103/ENSG00000070404/ENSG00000120899/ENSG00000254087/ENSG00000239672/ENSG00000145022/ENSG00000109670/ENSG00000162775/ENSG00000006712/ENSG00000169926/ENSG00000198728/ENSG00000119139/ENSG00000143772/ENSG00000078399/ENSG00000173334/ENSG00000276180/ENSG00000145675/ENSG00000158406/ENSG00000134138/ENSG00000143995/ENSG00000122641/ENSG00000185650/ENSG00000128016/ENSG00000106004/ENSG00000079385…	MAFB/FSTL3/PTK2B/LYN/NME1/TCTA/FBXW7/RBM15/PAF1/KLF13/LDB1/TJP2/ITPKB/HOXA9/TRIB1/HIST1H4I/PIK3R1/HIST1H4H/MEIS2/MEIS1/INHBA/ZFP36L1/ZFP36/HOXA5/CEACAM1/HIST1H4E/HIST1H4D/FBN1/INHA/HIST1H4J/HIST2H4B/HIST1H4C/HIST1H4K/LRRC17	34	17	ENSG00000120899/ENSG00000254087/ENSG00000109670/ENSG00000162775/ENSG00000169926/ENSG00000198728/ENSG00000119139/ENSG00000143772/ENSG00000078399/ENSG00000145675/ENSG00000134138/ENSG00000143995/ENSG00000185650/ENSG00000128016/ENSG00000106004/ENSG00000166147/ENSG00000123999	17	ENSG00000204103/ENSG00000070404/ENSG00000239672/ENSG00000145022/ENSG00000006712/ENSG00000173334/ENSG00000276180/ENSG00000158406/ENSG00000122641/ENSG00000079385/ENSG00000276966/ENSG00000277157/ENSG00000197238/ENSG00000270276/ENSG00000197061/ENSG00000273542/ENSG00000128606
BP	GO:0003174	mitral valve development	9/3465	11/14357	9.30647e-05	0.00713744	ENSG00000148400/ENSG00000115170/ENSG00000169242/ENSG00000107779/ENSG00000137834/ENSG00000204217/ENSG00000124766/ENSG00000122691/ENSG00000166341	NOTCH1/ACVR1/EFNA1/BMPR1A/SMAD6/BMPR2/SOX4/TWIST1/DCHS1	9	8	ENSG00000148400/ENSG00000115170/ENSG00000169242/ENSG00000107779/ENSG00000137834/ENSG00000204217/ENSG00000124766/ENSG00000122691	1	ENSG00000166341
BP	GO:0008544	epidermis development	117/3465	356/14357	0.000100706	0.00762182	ENSG00000163216/ENSG00000265972/ENSG00000203783/ENSG00000185479/ENSG00000118523/ENSG00000163435/ENSG00000241794/ENSG00000124151/ENSG00000135960/ENSG00000203785/ENSG00000124216/ENSG00000107984/ENSG00000205213/ENSG00000134363/ENSG00000075426/ENSG00000175793/ENSG00000101384/ENSG00000087494/ENSG00000148154/ENSG00000052344/ENSG00000244094/ENSG00000138802/ENSG00000136943/ENSG00000162738/ENSG00000189280…	SPRR2D/TXNIP/PRR9/KRT6B/CTGF/ELF3/SPRR2A/NCOA3/EDAR/SPRR2E/SNAI1/DKK1/LGR4/FST/FOSL2/SFN/JAG1/PTHLH/UGCG/PRSS8/SPRR2F/SEC24B/CTSV/VANGL2/GJB5/ACVR1B/SPRR1B/STK4/LATS2/LCE3E/NOTCH1/SOD1/NAB2/GRHL1/PKP3/SPRR4/TP63/KRT18/PTCH1/PRKCH/NME2/KRT9/PPARD/OVOL2/HES1/HOXC13/EDA/SHARPIN/FOXN1/VDR/KLK5/KRT17/RBPJ/LDB1/LCE3D/SPRR1A/SPINK6/KRT6C/GRHL2/KRT8/PPARA/KAZN/PI3/NAB1/FA2H/S100A7/MYSM1/KRTAP13-2/FLG/LCE…	117	53	ENSG00000265972/ENSG00000163435/ENSG00000124151/ENSG00000135960/ENSG00000205213/ENSG00000075426/ENSG00000101384/ENSG00000148154/ENSG00000052344/ENSG00000138802/ENSG00000162738/ENSG00000135503/ENSG00000101109/ENSG00000150457/ENSG00000148400/ENSG00000166886/ENSG00000134317/ENSG00000073282/ENSG00000185920/ENSG00000027075/ENSG00000112033/ENSG00000125850/ENSG00000114315/ENSG00000123364/ENSG00000158813…	64	ENSG00000163216/ENSG00000203783/ENSG00000185479/ENSG00000118523/ENSG00000241794/ENSG00000203785/ENSG00000124216/ENSG00000107984/ENSG00000134363/ENSG00000175793/ENSG00000087494/ENSG00000244094/ENSG00000136943/ENSG00000189280/ENSG00000169469/ENSG00000185966/ENSG00000142168/ENSG00000184363/ENSG00000184148/ENSG00000111057/ENSG00000243678/ENSG00000171403/ENSG00000179526/ENSG00000167754/ENSG00000128422…
BP	GO:0048732	gland development	123/3465	378/14357	0.000109613	0.00818826	ENSG00000163435/ENSG00000008083/ENSG00000135960/ENSG00000182580/ENSG00000140465/ENSG00000183779/ENSG00000143061/ENSG00000204103/ENSG00000166949/ENSG00000117139/ENSG00000198931/ENSG00000112972/ENSG00000164442/ENSG00000106571/ENSG00000160007/ENSG00000070404/ENSG00000124782/ENSG00000239672/ENSG00000233276/ENSG00000186350/ENSG00000148400/ENSG00000070159/ENSG00000142168/ENSG00000116455/ENSG00000100300…	ELF3/JARID2/EDAR/EPHB3/CYP1A1/ZNF703/IGSF3/MAFB/SMAD3/KDM5B/APRT/HMGCS1/CITED2/GLI3/ARHGAP35/FSTL3/RREB1/NME1/GPX1/RXRA/NOTCH1/PTPN3/SOD1/WDR77/TSPO/MET/MT-CO2/FBXW7/CDKN1B/WNT7B/DAG1/PML/RPS16/TP63/PHF2/PRMT5/ARHGAP5/PTCH1/BMPR1A/ABL1/PKM/ITGA2/HES1/SIX4/ASNS/EDA/GATA3/LRP6/CST3/FOXN1/VDR/TBX3/RBPJ/SNAI2/RHBDD3/ARID5B/FASN/PBX1/FEM1B/BTRC/STK11/XBP1/ASH1L/PPDPF/NKX3-1/AURKA/HOXA9/PLAG1/PTEN/KRAS…	123	85	ENSG00000163435/ENSG00000008083/ENSG00000135960/ENSG00000182580/ENSG00000140465/ENSG00000143061/ENSG00000166949/ENSG00000117139/ENSG00000112972/ENSG00000106571/ENSG00000160007/ENSG00000124782/ENSG00000186350/ENSG00000148400/ENSG00000070159/ENSG00000105976/ENSG00000109670/ENSG00000111276/ENSG00000188064/ENSG00000173402/ENSG00000140464/ENSG00000073282/ENSG00000197724/ENSG00000100852/ENSG00000185920…	38	ENSG00000183779/ENSG00000204103/ENSG00000198931/ENSG00000164442/ENSG00000070404/ENSG00000239672/ENSG00000233276/ENSG00000142168/ENSG00000116455/ENSG00000100300/ENSG00000198712/ENSG00000105193/ENSG00000100462/ENSG00000067225/ENSG00000070669/ENSG00000101439/ENSG00000135111/ENSG00000019549/ENSG00000100263/ENSG00000100219/ENSG00000125534/ENSG00000167034/ENSG00000213145/ENSG00000100889/ENSG00000136450…
BP	GO:0009991	response to extracellular stimulus	134/3465	418/14357	0.000118028	0.00870384	ENSG00000175592/ENSG00000019186/ENSG00000133056/ENSG00000140465/ENSG00000128564/ENSG00000073756/ENSG00000126775/ENSG00000184502/ENSG00000101670/ENSG00000175895/ENSG00000112972/ENSG00000177169/ENSG00000113161/ENSG00000177000/ENSG00000137193/ENSG00000130164/ENSG00000160007/ENSG00000084207/ENSG00000105372/ENSG00000113739/ENSG00000172071/ENSG00000136943/ENSG00000141682/ENSG00000128272/ENSG00000150907…	FOSL1/CYP24A1/PIK3C2B/CYP1A1/VGF/PTGS2/ATG14/GAST/LIPG/PLEKHF2/HMGCS1/ULK1/HMGCR/MTHFR/PIM1/LDLR/ARHGAP35/GSTP1/RPS19/STC2/EIF2AK3/CTSV/PMAIP1/ATF4/FOXO1/LYN/GIPR/GCLC/DCTPP1/MAP3K5/SLC2A1/MT-CYB/CBL/SOD1/TSPO/COX4I1/NUAK2/PPARGC1A/CYBA/ZFYVE1/SREBF1/DAD1/RNF152/NUDT1/NQO1/BCL11A/TSC1/FOS/TAF1/KDM4A/PKM/PPARD/ITGA2/KANK2/IL1B/ACSL3/FOXO3/ADIPOR2/USF1/ACSL4/SLC39A4/AMBRA1/ASNS/COMT/ERCC1/NENF/CST3…	134	79	ENSG00000019186/ENSG00000133056/ENSG00000140465/ENSG00000126775/ENSG00000101670/ENSG00000175895/ENSG00000112972/ENSG00000177169/ENSG00000113161/ENSG00000177000/ENSG00000137193/ENSG00000130164/ENSG00000160007/ENSG00000172071/ENSG00000150907/ENSG00000254087/ENSG00000010310/ENSG00000001084/ENSG00000197442/ENSG00000117394/ENSG00000110395/ENSG00000163545/ENSG00000109819/ENSG00000165861/ENSG00000072310…	55	ENSG00000175592/ENSG00000128564/ENSG00000073756/ENSG00000184502/ENSG00000084207/ENSG00000105372/ENSG00000113739/ENSG00000136943/ENSG00000141682/ENSG00000128272/ENSG00000179958/ENSG00000198727/ENSG00000142168/ENSG00000100300/ENSG00000131143/ENSG00000051523/ENSG00000129562/ENSG00000106268/ENSG00000181019/ENSG00000067225/ENSG00000125538/ENSG00000147804/ENSG00000070669/ENSG00000093010/ENSG00000012061…
BP	GO:0043588	skin development	105/3465	315/14357	0.000121685	0.00885993	ENSG00000163216/ENSG00000265972/ENSG00000203783/ENSG00000185479/ENSG00000241794/ENSG00000124151/ENSG00000135960/ENSG00000203785/ENSG00000124216/ENSG00000107984/ENSG00000205213/ENSG00000134363/ENSG00000075426/ENSG00000175793/ENSG00000101384/ENSG00000052344/ENSG00000244094/ENSG00000136943/ENSG00000188910/ENSG00000162738/ENSG00000135503/ENSG00000169469/ENSG00000101109/ENSG00000150457/ENSG00000185966…	SPRR2D/TXNIP/PRR9/KRT6B/SPRR2A/NCOA3/EDAR/SPRR2E/SNAI1/DKK1/LGR4/FST/FOSL2/SFN/JAG1/PRSS8/SPRR2F/CTSV/GJB3/VANGL2/ACVR1B/SPRR1B/STK4/LATS2/LCE3E/NOTCH1/SUFU/ARRDC3/GRHL1/MET/PKP3/SPRR4/TP63/KRT18/PRKCH/WDR48/NME2/KRT9/ITGA2/OVOL2/HOXC13/EDA/SHARPIN/FOXN1/VDR/KLK5/KRT17/RBPJ/LDB1/LCE3D/SPRR1A/SPINK6/KRT6C/GRHL2/ASH1L/KRT8/KAZN/PI3/FA2H/S100A7/MYSM1/KRTAP13-2/FLG/LTB/LCE1C/INHBA/IL20/EXPH5/POU3F1/L…	105	46	ENSG00000265972/ENSG00000124151/ENSG00000135960/ENSG00000205213/ENSG00000075426/ENSG00000101384/ENSG00000052344/ENSG00000162738/ENSG00000135503/ENSG00000101109/ENSG00000150457/ENSG00000148400/ENSG00000107882/ENSG00000113369/ENSG00000134317/ENSG00000105976/ENSG00000073282/ENSG00000027075/ENSG00000114742/ENSG00000164171/ENSG00000125850/ENSG00000123364/ENSG00000158813/ENSG00000109101/ENSG00000111424…	59	ENSG00000163216/ENSG00000203783/ENSG00000185479/ENSG00000241794/ENSG00000203785/ENSG00000124216/ENSG00000107984/ENSG00000134363/ENSG00000175793/ENSG00000244094/ENSG00000136943/ENSG00000188910/ENSG00000169469/ENSG00000185966/ENSG00000184363/ENSG00000184148/ENSG00000111057/ENSG00000243678/ENSG00000171403/ENSG00000179526/ENSG00000167754/ENSG00000128422/ENSG00000163202/ENSG00000169474/ENSG00000178172…
BP	GO:0030099	myeloid cell differentiation	116/3465	354/14357	0.000123303	0.00886545	ENSG00000185507/ENSG00000204103/ENSG00000101384/ENSG00000070404/ENSG00000105372/ENSG00000120899/ENSG00000254087/ENSG00000118058/ENSG00000119508/ENSG00000100985/ENSG00000239672/ENSG00000107957/ENSG00000135503/ENSG00000055609/ENSG00000100320/ENSG00000143575/ENSG00000137154/ENSG00000163041/ENSG00000134250/ENSG00000243364/ENSG00000083168/ENSG00000145022/ENSG00000169375/ENSG00000109670/ENSG00000164400…	IRF7/MAFB/JAG1/FSTL3/RPS19/PTK2B/LYN/KMT2A/NR4A3/MMP9/NME1/SH3PXD2A/ACVR1B/KMT2C/RBFOX2/HAX1/RPS6/H3F3A/NOTCH2/EFNA4/KAT6A/TCTA/SIN3A/FBXW7/CSF2/L3MBTL1/HIST1H3B/PML/EIF6/GP1BA/RBM15/SMAD5/ARID4A/FOS/PRKX/NFE2L1/ARNT/FOXO3/KMT2D/PAF1/KMT2E/EPAS1/KLF13/GATA3/IL23A/RPS14/BCL6/RBPJ/LDB1/PTBP3/ATP5IF1/HIST1H3H/TJP2/HIST1H3A/TNRC6B/GAB2/ITPKB/JAGN1/HOXA9/TRIB1/HIST1H4I/HMGB2/TNRC6A/PIK3R1/PIP4K2A/SP3/…	116	68	ENSG00000101384/ENSG00000120899/ENSG00000254087/ENSG00000118058/ENSG00000107957/ENSG00000135503/ENSG00000055609/ENSG00000100320/ENSG00000134250/ENSG00000243364/ENSG00000083168/ENSG00000169375/ENSG00000109670/ENSG00000185513/ENSG00000140464/ENSG00000185245/ENSG00000162775/ENSG00000113658/ENSG00000032219/ENSG00000170345/ENSG00000183943/ENSG00000082641/ENSG00000143437/ENSG00000118689/ENSG00000167548…	48	ENSG00000185507/ENSG00000204103/ENSG00000070404/ENSG00000105372/ENSG00000119508/ENSG00000100985/ENSG00000239672/ENSG00000143575/ENSG00000137154/ENSG00000163041/ENSG00000145022/ENSG00000164400/ENSG00000274267/ENSG00000242372/ENSG00000006712/ENSG00000110944/ENSG00000164587/ENSG00000130770/ENSG00000278828/ENSG00000275714/ENSG00000171135/ENSG00000173334/ENSG00000276180/ENSG00000198890/ENSG00000108342…
BP	GO:0006335	DNA replication-dependent nucleosome assembly	17/3465	30/14357	0.000133448	0.00936089	ENSG00000274267/ENSG00000128708/ENSG00000278828/ENSG00000275714/ENSG00000276180/ENSG00000158406/ENSG00000278272/ENSG00000274750/ENSG00000276966/ENSG00000277157/ENSG00000196497/ENSG00000197153/ENSG00000197238/ENSG00000273983/ENSG00000270276/ENSG00000197061/ENSG00000273542	HIST1H3B/HAT1/HIST1H3H/HIST1H3A/HIST1H4I/HIST1H4H/HIST1H3C/HIST1H3E/HIST1H4E/HIST1H4D/IPO4/HIST1H3J/HIST1H4J/HIST1H3G/HIST2H4B/HIST1H4C/HIST1H4K	17	0		17	ENSG00000274267/ENSG00000128708/ENSG00000278828/ENSG00000275714/ENSG00000276180/ENSG00000158406/ENSG00000278272/ENSG00000274750/ENSG00000276966/ENSG00000277157/ENSG00000196497/ENSG00000197153/ENSG00000197238/ENSG00000273983/ENSG00000270276/ENSG00000197061/ENSG00000273542
BP	GO:0034723	DNA replication-dependent nucleosome organization	17/3465	30/14357	0.000133448	0.00936089	ENSG00000274267/ENSG00000128708/ENSG00000278828/ENSG00000275714/ENSG00000276180/ENSG00000158406/ENSG00000278272/ENSG00000274750/ENSG00000276966/ENSG00000277157/ENSG00000196497/ENSG00000197153/ENSG00000197238/ENSG00000273983/ENSG00000270276/ENSG00000197061/ENSG00000273542	HIST1H3B/HAT1/HIST1H3H/HIST1H3A/HIST1H4I/HIST1H4H/HIST1H3C/HIST1H3E/HIST1H4E/HIST1H4D/IPO4/HIST1H3J/HIST1H4J/HIST1H3G/HIST2H4B/HIST1H4C/HIST1H4K	17	0		17	ENSG00000274267/ENSG00000128708/ENSG00000278828/ENSG00000275714/ENSG00000276180/ENSG00000158406/ENSG00000278272/ENSG00000274750/ENSG00000276966/ENSG00000277157/ENSG00000196497/ENSG00000197153/ENSG00000197238/ENSG00000273983/ENSG00000270276/ENSG00000197061/ENSG00000273542
BP	GO:0002251	organ or tissue specific immune response	15/3465	25/14357	0.000138283	0.00958318	ENSG00000136244/ENSG00000184678/ENSG00000264522/ENSG00000198918/ENSG00000185436/ENSG00000273802/ENSG00000197903/ENSG00000160712/ENSG00000140297/ENSG00000274290/ENSG00000278588/ENSG00000124635/ENSG00000126262/ENSG00000183709/ENSG00000164825	IL6/HIST2H2BE/OTUD7B/RPL39/IFNLR1/HIST1H2BG/HIST1H2BK/IL6R/GCNT3/HIST1H2BE/HIST1H2BI/HIST1H2BJ/FFAR2/IFNL2/DEFB1	15	5	ENSG00000264522/ENSG00000185436/ENSG00000160712/ENSG00000140297/ENSG00000124635	10	ENSG00000136244/ENSG00000184678/ENSG00000198918/ENSG00000273802/ENSG00000197903/ENSG00000274290/ENSG00000278588/ENSG00000126262/ENSG00000183709/ENSG00000164825
BP	GO:0060411	cardiac septum morphogenesis	28/3465	61/14357	0.000162632	0.0110661	ENSG00000101384/ENSG00000164442/ENSG00000162738/ENSG00000148400/ENSG00000134250/ENSG00000115170/ENSG00000162775/ENSG00000107779/ENSG00000114315/ENSG00000135111/ENSG00000137834/ENSG00000180340/ENSG00000101665/ENSG00000204217/ENSG00000075223/ENSG00000162496/ENSG00000106991/ENSG00000163513/ENSG00000124766/ENSG00000164683/ENSG00000171316/ENSG00000117707/ENSG00000069702/ENSG00000092969/ENSG00000114251…	JAG1/CITED2/VANGL2/NOTCH1/NOTCH2/ACVR1/RBM15/BMPR1A/HES1/TBX3/SMAD6/FZD2/SMAD7/BMPR2/SEMA3C/DHRS3/ENG/TGFBR2/SOX4/HEY1/CHD7/PROX1/TGFBR3/TGFB2/WNT5A/MIR17HG/HEY2/WNT11	28	25	ENSG00000101384/ENSG00000162738/ENSG00000148400/ENSG00000134250/ENSG00000115170/ENSG00000162775/ENSG00000107779/ENSG00000114315/ENSG00000137834/ENSG00000180340/ENSG00000101665/ENSG00000204217/ENSG00000075223/ENSG00000162496/ENSG00000106991/ENSG00000163513/ENSG00000124766/ENSG00000164683/ENSG00000171316/ENSG00000117707/ENSG00000069702/ENSG00000092969/ENSG00000114251/ENSG00000135547/ENSG00000085741	3	ENSG00000164442/ENSG00000135111/ENSG00000215417
BP	GO:0001701	in utero embryonic development	95/3465	282/14357	0.00016353	0.0110661	ENSG00000175592/ENSG00000163435/ENSG00000108175/ENSG00000173706/ENSG00000124216/ENSG00000166949/ENSG00000106571/ENSG00000147050/ENSG00000165916/ENSG00000057657/ENSG00000130726/ENSG00000188910/ENSG00000078401/ENSG00000189280/ENSG00000135503/ENSG00000186350/ENSG00000101109/ENSG00000150457/ENSG00000148400/ENSG00000013275/ENSG00000120063/ENSG00000172273/ENSG00000137845/ENSG00000169375/ENSG00000181649…	FOSL1/ELF3/ZMIZ1/HEG1/SNAI1/SMAD3/GLI3/KDM6A/PSMC3/PRDM1/TRIM28/GJB3/EDN1/GJB5/ACVR1B/RXRA/STK4/LATS2/NOTCH1/PSMC4/GNA13/HINFP/ADAM10/SIN3A/PHLDA2/CSF2/ENDOG/WNT7B/YBX1/TAF8/ACVR1/SEC24D/ZFAND5/DAD1/SF3B6/GGNBP2/SOCS3/SPINT1/RRP7A/BTF3/PTCH1/BMPR1A/MIB1/COL4A3BP/ARNT/OVOL2/RPL7L1/HES1/BRK1/ZPR1/EPAS1/ZP3/GATA3/TBX3/RBPJ/SPINT2/GRHL2/KRT8/AMOT/NDEL1/MBNL1/SETD2/RTF1/TFEB/SP3/HIF1A/INPP5B/FUT8/SRSF…	95	59	ENSG00000163435/ENSG00000108175/ENSG00000173706/ENSG00000166949/ENSG00000106571/ENSG00000147050/ENSG00000135503/ENSG00000186350/ENSG00000101109/ENSG00000150457/ENSG00000148400/ENSG00000120063/ENSG00000172273/ENSG00000137845/ENSG00000169375/ENSG00000188064/ENSG00000137413/ENSG00000115170/ENSG00000150961/ENSG00000107372/ENSG00000278311/ENSG00000184557/ENSG00000166145/ENSG00000185920/ENSG00000107779…	36	ENSG00000175592/ENSG00000124216/ENSG00000165916/ENSG00000057657/ENSG00000130726/ENSG00000188910/ENSG00000078401/ENSG00000189280/ENSG00000013275/ENSG00000181649/ENSG00000164400/ENSG00000167136/ENSG00000065978/ENSG00000129562/ENSG00000115128/ENSG00000189306/ENSG00000145741/ENSG00000146223/ENSG00000254999/ENSG00000109917/ENSG00000188372/ENSG00000135111/ENSG00000167642/ENSG00000170421/ENSG00000136450…
BP	GO:0061311	cell surface receptor signaling pathway involved in heart development	14/3465	23/14357	0.000187296	0.0125271	ENSG00000124216/ENSG00000107984/ENSG00000101384/ENSG00000162738/ENSG00000148400/ENSG00000134250/ENSG00000115170/ENSG00000107779/ENSG00000168214/ENSG00000164683/ENSG00000114251/ENSG00000128917/ENSG00000135547/ENSG00000163132	SNAI1/DKK1/JAG1/VANGL2/NOTCH1/NOTCH2/ACVR1/BMPR1A/RBPJ/HEY1/WNT5A/DLL4/HEY2/MSX1	14	10	ENSG00000101384/ENSG00000162738/ENSG00000148400/ENSG00000134250/ENSG00000115170/ENSG00000107779/ENSG00000168214/ENSG00000164683/ENSG00000114251/ENSG00000135547	4	ENSG00000124216/ENSG00000107984/ENSG00000128917/ENSG00000163132
BP	GO:0003231	cardiac ventricle development	41/3465	102/14357	0.000229068	0.0150438	ENSG00000173706/ENSG00000101384/ENSG00000164442/ENSG00000057657/ENSG00000162738/ENSG00000186350/ENSG00000148400/ENSG00000107882/ENSG00000115170/ENSG00000162775/ENSG00000107779/ENSG00000114315/ENSG00000107485/ENSG00000135111/ENSG00000168214/ENSG00000083307/ENSG00000137834/ENSG00000180340/ENSG00000100644/ENSG00000101665/ENSG00000204217/ENSG00000075223/ENSG00000106991/ENSG00000166225/ENSG00000163513…	HEG1/JAG1/CITED2/PRDM1/VANGL2/RXRA/NOTCH1/SUFU/ACVR1/RBM15/BMPR1A/HES1/GATA3/TBX3/RBPJ/GRHL2/SMAD6/FZD2/HIF1A/SMAD7/BMPR2/SEMA3C/ENG/FRS2/TGFBR2/SOX4/HEY1/CHD7/SALL4/TNNT2/PROX1/TGFBR3/TGFB2/WNT5A/DLL4/MIR17HG/HEY2/TNNI1/PAX8/SALL1/WNT11	41	34	ENSG00000173706/ENSG00000101384/ENSG00000162738/ENSG00000186350/ENSG00000148400/ENSG00000107882/ENSG00000115170/ENSG00000162775/ENSG00000107779/ENSG00000114315/ENSG00000107485/ENSG00000168214/ENSG00000083307/ENSG00000137834/ENSG00000180340/ENSG00000100644/ENSG00000101665/ENSG00000204217/ENSG00000075223/ENSG00000106991/ENSG00000166225/ENSG00000163513/ENSG00000124766/ENSG00000164683/ENSG00000171316…	7	ENSG00000164442/ENSG00000057657/ENSG00000135111/ENSG00000128917/ENSG00000215417/ENSG00000159173/ENSG00000125618
BP	GO:0042274	ribosomal small subunit biogenesis	31/3465	71/14357	0.000230156	0.0150438	ENSG00000105372/ENSG00000125445/ENSG00000137154/ENSG00000184967/ENSG00000171863/ENSG00000115268/ENSG00000132591/ENSG00000168028/ENSG00000007520/ENSG00000146109/ENSG00000105193/ENSG00000189306/ENSG00000142937/ENSG00000227057/ENSG00000156697/ENSG00000083845/ENSG00000172809/ENSG00000164587/ENSG00000141076/ENSG00000181991/ENSG00000177954/ENSG00000233927/ENSG00000171858/ENSG00000132467/ENSG00000183520…	RPS19/MRPS7/RPS6/NOC4L/RPS7/RPS15/ERAL1/RPSA/TSR3/ABT1/RPS16/RRP7A/RPS8/WDR46/UTP14A/RPS5/RPL38/RPS14/UTP4/MRPS11/RPS27/RPS28/RPS21/UTP3/UTP11/RPS27L/RRS1/UTP23/BYSL/LTV1/PWP2	31	0		31	ENSG00000105372/ENSG00000125445/ENSG00000137154/ENSG00000184967/ENSG00000171863/ENSG00000115268/ENSG00000132591/ENSG00000168028/ENSG00000007520/ENSG00000146109/ENSG00000105193/ENSG00000189306/ENSG00000142937/ENSG00000227057/ENSG00000156697/ENSG00000083845/ENSG00000172809/ENSG00000164587/ENSG00000141076/ENSG00000181991/ENSG00000177954/ENSG00000233927/ENSG00000171858/ENSG00000132467/ENSG00000183520…
BP	GO:0046890	regulation of lipid biosynthetic process	55/3465	148/14357	0.000258101	0.0165734	ENSG00000186480/ENSG00000124216/ENSG00000073756/ENSG00000156671/ENSG00000185591/ENSG00000165175/ENSG00000112972/ENSG00000113161/ENSG00000130164/ENSG00000067182/ENSG00000012660/ENSG00000132341/ENSG00000164211/ENSG00000163344/ENSG00000125629/ENSG00000131791/ENSG00000142168/ENSG00000163932/ENSG00000100300/ENSG00000110921/ENSG00000109670/ENSG00000135446/ENSG00000109819/ENSG00000242372/ENSG00000072310…	INSIG1/SNAI1/PTGS2/SAMD8/SP1/MID1IP1/HMGCS1/HMGCR/LDLR/TNFRSF1A/ELOVL5/RAN/STARD4/PMVK/INSIG2/PRKAB2/SOD1/PRKCD/TSPO/MVK/FBXW7/CDK4/PPARGC1A/EIF6/SREBF1/EGR1/IL1B/ACSL3/ADIPOR2/ORMDL2/TM7SF2/ZP3/VDR/SNAI2/IGFBP7/FASN/CNEP1R1/STK11/SQLE/SMPD2/CYP51A1/NFYA/SLC27A1/APOE/SIK1/REST/LPCAT1/CEACAM1/ABCG1/PDK4/GPER1/PROX1/SORBS1/PLIN5/FGF19	55	37	ENSG00000186480/ENSG00000156671/ENSG00000185591/ENSG00000165175/ENSG00000112972/ENSG00000113161/ENSG00000130164/ENSG00000067182/ENSG00000012660/ENSG00000164211/ENSG00000125629/ENSG00000131791/ENSG00000163932/ENSG00000110921/ENSG00000109670/ENSG00000109819/ENSG00000072310/ENSG00000120738/ENSG00000123983/ENSG00000006831/ENSG00000111424/ENSG00000169710/ENSG00000205423/ENSG00000118046/ENSG00000104549…	18	ENSG00000124216/ENSG00000073756/ENSG00000132341/ENSG00000163344/ENSG00000142168/ENSG00000100300/ENSG00000135446/ENSG00000242372/ENSG00000125538/ENSG00000123353/ENSG00000149809/ENSG00000188372/ENSG00000019549/ENSG00000163453/ENSG00000135587/ENSG00000130203/ENSG00000079385/ENSG00000164850
BP	GO:0061138	morphogenesis of a branching epithelium	58/3465	158/14357	0.00025932	0.0165734	ENSG00000205213/ENSG00000198435/ENSG00000117139/ENSG00000106571/ENSG00000162738/ENSG00000078401/ENSG00000186350/ENSG00000101109/ENSG00000148400/ENSG00000120063/ENSG00000105976/ENSG00000173402/ENSG00000140464/ENSG00000115170/ENSG00000073282/ENSG00000184557/ENSG00000162775/ENSG00000166145/ENSG00000185920/ENSG00000097007/ENSG00000172531/ENSG00000100625/ENSG00000070018/ENSG00000111424/ENSG00000135111…	LGR4/NRARP/KDM5B/GLI3/VANGL2/EDN1/RXRA/STK4/NOTCH1/GNA13/MET/DAG1/PML/ACVR1/TP63/SOCS3/RBM15/SPINT1/PTCH1/ABL1/PPP1CA/SIX4/LRP6/VDR/TBX3/FOXD1/CTSH/SNAI2/PBX1/FEM1B/SPINT2/BTRC/GRHL2/NKX3-1/KRAS/TACSTD2/SEMA3A/SRC/BTBD7/SEMA3C/WNT2B/AREG/ENG/ADM/FRS2/TGFBR2/HOXA5/LHX1/PROX1/HOXA11/DCHS1/WNT5A/DLL4/PAX8/SPRY1/SALL1/HNF1B/GLI2	58	42	ENSG00000205213/ENSG00000117139/ENSG00000106571/ENSG00000162738/ENSG00000186350/ENSG00000101109/ENSG00000148400/ENSG00000120063/ENSG00000105976/ENSG00000173402/ENSG00000140464/ENSG00000115170/ENSG00000073282/ENSG00000184557/ENSG00000162775/ENSG00000166145/ENSG00000185920/ENSG00000097007/ENSG00000100625/ENSG00000070018/ENSG00000111424/ENSG00000185630/ENSG00000169018/ENSG00000166167/ENSG00000083307…	16	ENSG00000198435/ENSG00000078401/ENSG00000172531/ENSG00000135111/ENSG00000251493/ENSG00000103811/ENSG00000019549/ENSG00000167642/ENSG00000167034/ENSG00000184292/ENSG00000109321/ENSG00000005073/ENSG00000166341/ENSG00000128917/ENSG00000125618/ENSG00000275410
BP	GO:0016331	morphogenesis of embryonic epithelium	51/3465	135/14357	0.000268612	0.0169786	ENSG00000147050/ENSG00000160007/ENSG00000172757/ENSG00000138802/ENSG00000162738/ENSG00000101109/ENSG00000171863/ENSG00000107882/ENSG00000204138/ENSG00000188064/ENSG00000137203/ENSG00000138771/ENSG00000073282/ENSG00000108518/ENSG00000166145/ENSG00000185920/ENSG00000165699/ENSG00000097007/ENSG00000101752/ENSG00000125850/ENSG00000100625/ENSG00000164741/ENSG00000107485/ENSG00000070018/ENSG00000142867…	KDM6A/ARHGAP35/CFL1/SEC24B/VANGL2/STK4/RPS7/SUFU/PHACTR4/WNT7B/TFAP2A/SHROOM3/TP63/PFN1/SPINT1/PTCH1/TSC1/ABL1/MIB1/OVOL2/SIX4/DLC1/GATA3/LRP6/BCL10/SPINT2/GRHL2/SETD2/APAF1/SEMA4C/FZD2/TRAF6/HIF1A/WNT2B/IRX3/ADM/ARID1A/SOX4/IRX1/SALL4/TWIST1/GRHL3/HES5/TGFB2/WNT5A/FOLR1/SKI/NODAL/PAX8/HNF1B/GLI2	51	43	ENSG00000147050/ENSG00000160007/ENSG00000138802/ENSG00000162738/ENSG00000101109/ENSG00000107882/ENSG00000204138/ENSG00000188064/ENSG00000137203/ENSG00000138771/ENSG00000073282/ENSG00000166145/ENSG00000185920/ENSG00000165699/ENSG00000097007/ENSG00000101752/ENSG00000125850/ENSG00000100625/ENSG00000164741/ENSG00000107485/ENSG00000070018/ENSG00000142867/ENSG00000083307/ENSG00000181555/ENSG00000120868…	8	ENSG00000172757/ENSG00000171863/ENSG00000108518/ENSG00000167642/ENSG00000170549/ENSG00000110195/ENSG00000125618/ENSG00000275410
BP	GO:0001890	placenta development	50/3465	132/14357	0.00028494	0.0178149	ENSG00000175592/ENSG00000124216/ENSG00000073756/ENSG00000057657/ENSG00000130726/ENSG00000113739/ENSG00000136943/ENSG00000188910/ENSG00000189280/ENSG00000186350/ENSG00000101109/ENSG00000137154/ENSG00000142168/ENSG00000181649/ENSG00000164400/ENSG00000111276/ENSG00000188064/ENSG00000278311/ENSG00000184557/ENSG00000162775/ENSG00000166145/ENSG00000143437/ENSG00000112033/ENSG00000125850/ENSG00000172270…	FOSL1/SNAI1/PTGS2/PRDM1/TRIM28/STC2/CTSV/GJB3/GJB5/RXRA/STK4/RPS6/SOD1/PHLDA2/CSF2/CDKN1B/WNT7B/GGNBP2/SOCS3/RBM15/SPINT1/ARNT/PPARD/OVOL2/BSG/HES1/EPAS1/VDR/RBPJ/SPINT2/GRHL2/ASH1L/KRT8/SETD2/TFEB/SP3/HIF1A/BMPR2/TEX19/ADM/ARID1A/ZFP36L1/CCNF/HEY1/NCOA1/E2F8/STC1/HEY2/NODAL/ASCL2	50	32	ENSG00000186350/ENSG00000101109/ENSG00000111276/ENSG00000188064/ENSG00000278311/ENSG00000184557/ENSG00000162775/ENSG00000166145/ENSG00000143437/ENSG00000112033/ENSG00000125850/ENSG00000114315/ENSG00000116016/ENSG00000111424/ENSG00000168214/ENSG00000083307/ENSG00000116539/ENSG00000181555/ENSG00000112561/ENSG00000172845/ENSG00000100644/ENSG00000204217/ENSG00000182459/ENSG00000148926/ENSG00000117713…	18	ENSG00000175592/ENSG00000124216/ENSG00000073756/ENSG00000057657/ENSG00000130726/ENSG00000113739/ENSG00000136943/ENSG00000188910/ENSG00000189280/ENSG00000137154/ENSG00000142168/ENSG00000181649/ENSG00000164400/ENSG00000172270/ENSG00000167642/ENSG00000170421/ENSG00000159167/ENSG00000183734
BP	GO:0007254	JNK cascade	67/3465	189/14357	0.000292669	0.0180618	ENSG00000118523/ENSG00000081913/ENSG00000135960/ENSG00000095370/ENSG00000107984/ENSG00000177283/ENSG00000078900/ENSG00000136848/ENSG00000140443/ENSG00000084207/ENSG00000006432/ENSG00000120899/ENSG00000162738/ENSG00000143947/ENSG00000078401/ENSG00000132522/ENSG00000197442/ENSG00000078747/ENSG00000141503/ENSG00000146192/ENSG00000149273/ENSG00000156299/ENSG00000188064/ENSG00000125249/ENSG00000221983…	CTGF/PHLPP1/EDAR/SH2D3C/DKK1/FZD8/TP73/DAB2IP/IGF1R/GSTP1/MAP3K9/PTK2B/VANGL2/RPS27A/EDN1/GPS2/MAP3K5/ITCH/MINK1/FGD2/RPS3/TIAM1/WNT7B/RAP2A/UBA52/DUSP10/TNIK/IL1B/MAP3K21/UBC/PTPN1/MAP2K7/NOD1/IRAK1/MAP3K2/IRAK2/SH3RF1/TAB2/MAP4K3/TAOK1/TRIB1/TAOK3/RB1CC1/TAB3/CRKL/GADD45A/TRAF6/SEMA3A/HIPK2/AXIN1/DACT1/PTGER4/CARD9/MAGI3/SASH1/PER1/MECOM/FZD10/MAP2K4/TLR6/UBE2V1/UNC5CL/WNT5A/GADD45B/NOD2/FGF19/…	67	50	ENSG00000081913/ENSG00000135960/ENSG00000095370/ENSG00000078900/ENSG00000136848/ENSG00000140443/ENSG00000006432/ENSG00000120899/ENSG00000162738/ENSG00000197442/ENSG00000078747/ENSG00000141503/ENSG00000156299/ENSG00000188064/ENSG00000125249/ENSG00000143507/ENSG00000154310/ENSG00000143674/ENSG00000150991/ENSG00000196396/ENSG00000076984/ENSG00000106100/ENSG00000169967/ENSG00000134070/ENSG00000154447…	17	ENSG00000118523/ENSG00000107984/ENSG00000177283/ENSG00000084207/ENSG00000143947/ENSG00000078401/ENSG00000132522/ENSG00000146192/ENSG00000149273/ENSG00000221983/ENSG00000125538/ENSG00000184216/ENSG00000173334/ENSG00000116717/ENSG00000171522/ENSG00000187796/ENSG00000099860
BP	GO:0030216	keratinocyte differentiation	74/3465	213/14357	0.000295168	0.0180618	ENSG00000163216/ENSG00000265972/ENSG00000203783/ENSG00000185479/ENSG00000241794/ENSG00000124151/ENSG00000203785/ENSG00000075426/ENSG00000175793/ENSG00000101384/ENSG00000052344/ENSG00000244094/ENSG00000136943/ENSG00000169469/ENSG00000101109/ENSG00000150457/ENSG00000185966/ENSG00000148400/ENSG00000134317/ENSG00000184363/ENSG00000184148/ENSG00000073282/ENSG00000111057/ENSG00000027075/ENSG00000243678…	SPRR2D/TXNIP/PRR9/KRT6B/SPRR2A/NCOA3/SPRR2E/FOSL2/SFN/JAG1/PRSS8/SPRR2F/CTSV/SPRR1B/STK4/LATS2/LCE3E/NOTCH1/GRHL1/PKP3/SPRR4/TP63/KRT18/PRKCH/NME2/KRT9/OVOL2/SHARPIN/FOXN1/VDR/KLK5/KRT17/RBPJ/LCE3D/SPRR1A/SPINK6/KRT6C/GRHL2/KRT8/KAZN/PI3/S100A7/KRTAP13-2/FLG/LCE1C/IL20/EXPH5/POU3F1/LCE1F/ZFP36L1/ZFP36/KRT32/KRT81/EREG/CTSK/LCE3A/KRT23/SPRR3/LCE1E/C1orf68/LELP1/BCL11B/KRT34/WNT5A/KRTAP19-5/KRT36/K…	74	25	ENSG00000265972/ENSG00000124151/ENSG00000075426/ENSG00000101384/ENSG00000052344/ENSG00000101109/ENSG00000150457/ENSG00000148400/ENSG00000134317/ENSG00000073282/ENSG00000027075/ENSG00000125850/ENSG00000109101/ENSG00000111424/ENSG00000168214/ENSG00000083307/ENSG00000189337/ENSG00000110723/ENSG00000185650/ENSG00000128016/ENSG00000124882/ENSG00000143387/ENSG00000127152/ENSG00000114251/ENSG00000173239	49	ENSG00000163216/ENSG00000203783/ENSG00000185479/ENSG00000241794/ENSG00000203785/ENSG00000175793/ENSG00000244094/ENSG00000136943/ENSG00000169469/ENSG00000185966/ENSG00000184363/ENSG00000184148/ENSG00000111057/ENSG00000243678/ENSG00000171403/ENSG00000179526/ENSG00000167754/ENSG00000128422/ENSG00000163202/ENSG00000169474/ENSG00000178172/ENSG00000170465/ENSG00000170421/ENSG00000124102/ENSG00000143556…
BP	GO:0009123	nucleoside monophosphate metabolic process	109/3465	336/14357	0.000298775	0.0180901	ENSG00000168209/ENSG00000108179/ENSG00000198888/ENSG00000090266/ENSG00000164405/ENSG00000198763/ENSG00000147684/ENSG00000198931/ENSG00000198804/ENSG00000172115/ENSG00000143153/ENSG00000154723/ENSG00000116288/ENSG00000074800/ENSG00000198727/ENSG00000124172/ENSG00000147123/ENSG00000178035/ENSG00000189043/ENSG00000100300/ENSG00000145494/ENSG00000198712/ENSG00000168653/ENSG00000111669/ENSG00000159199…	DDIT4/PPIF/MT-ND1/NDUFB2/UQCRQ/MT-ND2/NDUFB9/APRT/MT-CO1/CYCS/ATP1B1/ATP5PF/PARK7/ENO1/MT-CYB/ATP5F1E/NDUFB11/IMPDH2/NDUFA4/TSPO/NDUFS6/MT-CO2/NDUFS5/TPI1/ATP5MC1/ATP5MF/COX4I1/COX6C/DTYMK/PPARGC1A/COX6A1/EIF6/TK1/NDUFA6/COX8A/NDUFB7/UQCC2/MT-CO3/COX5B/NDUFC2/UQCRH/ATP5PD/DNPH1/PGM2L1/NDUFA1/ATP5F1D/PKM/PGAM1/ARNT/NDUFA2/NDUFB10/NDUFB1/GUK1/NDUFA8/NDUFC1/NDUFA11/ATP5PB/ATP5MC3/NDUFAB1/ATP5ME/CYC1…	109	18	ENSG00000168209/ENSG00000143153/ENSG00000109819/ENSG00000165434/ENSG00000143437/ENSG00000119139/ENSG00000186951/ENSG00000139496/ENSG00000006695/ENSG00000100644/ENSG00000114573/ENSG00000081026/ENSG00000171105/ENSG00000085231/ENSG00000178127/ENSG00000165240/ENSG00000116039/ENSG00000135537	91	ENSG00000108179/ENSG00000198888/ENSG00000090266/ENSG00000164405/ENSG00000198763/ENSG00000147684/ENSG00000198931/ENSG00000198804/ENSG00000172115/ENSG00000154723/ENSG00000116288/ENSG00000074800/ENSG00000198727/ENSG00000124172/ENSG00000147123/ENSG00000178035/ENSG00000189043/ENSG00000100300/ENSG00000145494/ENSG00000198712/ENSG00000168653/ENSG00000111669/ENSG00000159199/ENSG00000241468/ENSG00000131143…
BP	GO:0060021	roof of mouth development	32/3465	75/14357	0.000306548	0.0183673	ENSG00000182580/ENSG00000186480/ENSG00000124216/ENSG00000106571/ENSG00000125629/ENSG00000137203/ENSG00000163659/ENSG00000107779/ENSG00000070018/ENSG00000135111/ENSG00000133216/ENSG00000019549/ENSG00000150347/ENSG00000180340/ENSG00000114739/ENSG00000162496/ENSG00000178860/ENSG00000122641/ENSG00000119042/ENSG00000111845/ENSG00000163513/ENSG00000171316/ENSG00000122691/ENSG00000179981/ENSG00000006377…	EPHB3/INSIG1/SNAI1/GLI3/INSIG2/TFAP2A/TIPARP/BMPR1A/LRP6/TBX3/EPHB2/SNAI2/ARID5B/FZD2/ACVR2B/DHRS3/MSC/INHBA/SATB2/PAK1IP1/TGFBR2/CHD7/TWIST1/TSHZ1/DLX6/BCOR/TGFBR3/TGFB2/WNT5A/SKI/MSX1/WNT11	32	25	ENSG00000182580/ENSG00000186480/ENSG00000106571/ENSG00000125629/ENSG00000137203/ENSG00000163659/ENSG00000107779/ENSG00000070018/ENSG00000133216/ENSG00000150347/ENSG00000180340/ENSG00000114739/ENSG00000162496/ENSG00000119042/ENSG00000163513/ENSG00000171316/ENSG00000122691/ENSG00000179981/ENSG00000006377/ENSG00000183337/ENSG00000069702/ENSG00000092969/ENSG00000114251/ENSG00000157933/ENSG00000085741	7	ENSG00000124216/ENSG00000135111/ENSG00000019549/ENSG00000178860/ENSG00000122641/ENSG00000111845/ENSG00000163132
BP	GO:0035909	aorta morphogenesis	16/3465	29/14357	0.000319212	0.018778	ENSG00000101384/ENSG00000138802/ENSG00000148400/ENSG00000107779/ENSG00000114315/ENSG00000168214/ENSG00000125266/ENSG00000284485/ENSG00000106991/ENSG00000124766/ENSG00000164683/ENSG00000171316/ENSG00000117707/ENSG00000092969/ENSG00000128917/ENSG00000135547	JAG1/SEC24B/NOTCH1/BMPR1A/HES1/RBPJ/EFNB2/MIR205/ENG/SOX4/HEY1/CHD7/PROX1/TGFB2/DLL4/HEY2	16	14	ENSG00000101384/ENSG00000138802/ENSG00000148400/ENSG00000107779/ENSG00000114315/ENSG00000168214/ENSG00000284485/ENSG00000106991/ENSG00000124766/ENSG00000164683/ENSG00000171316/ENSG00000117707/ENSG00000092969/ENSG00000135547	2	ENSG00000125266/ENSG00000128917
BP	GO:0001841	neural tube formation	39/3465	97/14357	0.000319932	0.018778	ENSG00000147050/ENSG00000160007/ENSG00000172757/ENSG00000138802/ENSG00000162738/ENSG00000101109/ENSG00000171863/ENSG00000107882/ENSG00000204138/ENSG00000138771/ENSG00000108518/ENSG00000166145/ENSG00000185920/ENSG00000165699/ENSG00000097007/ENSG00000101752/ENSG00000125850/ENSG00000164741/ENSG00000070018/ENSG00000142867/ENSG00000167642/ENSG00000083307/ENSG00000181555/ENSG00000120868/ENSG00000168758…	KDM6A/ARHGAP35/CFL1/SEC24B/VANGL2/STK4/RPS7/SUFU/PHACTR4/SHROOM3/PFN1/SPINT1/PTCH1/TSC1/ABL1/MIB1/OVOL2/DLC1/LRP6/BCL10/SPINT2/GRHL2/SETD2/APAF1/SEMA4C/FZD2/TRAF6/HIF1A/ADM/ARID1A/SOX4/SALL4/TWIST1/GRHL3/TGFB2/WNT5A/FOLR1/SKI/NODAL	39	34	ENSG00000147050/ENSG00000160007/ENSG00000138802/ENSG00000162738/ENSG00000101109/ENSG00000107882/ENSG00000204138/ENSG00000138771/ENSG00000166145/ENSG00000185920/ENSG00000165699/ENSG00000097007/ENSG00000101752/ENSG00000125850/ENSG00000164741/ENSG00000070018/ENSG00000142867/ENSG00000083307/ENSG00000181555/ENSG00000120868/ENSG00000168758/ENSG00000180340/ENSG00000175104/ENSG00000100644/ENSG00000148926…	5	ENSG00000172757/ENSG00000171863/ENSG00000108518/ENSG00000167642/ENSG00000110195
BP	GO:0003279	cardiac septum development	37/3465	91/14357	0.000347066	0.0201231	ENSG00000173706/ENSG00000101384/ENSG00000164442/ENSG00000057657/ENSG00000162738/ENSG00000148400/ENSG00000134250/ENSG00000107882/ENSG00000115170/ENSG00000162775/ENSG00000107779/ENSG00000070614/ENSG00000114315/ENSG00000107485/ENSG00000135111/ENSG00000137834/ENSG00000180340/ENSG00000101665/ENSG00000204217/ENSG00000075223/ENSG00000162496/ENSG00000106991/ENSG00000166225/ENSG00000163513/ENSG00000124766…	HEG1/JAG1/CITED2/PRDM1/VANGL2/NOTCH1/NOTCH2/SUFU/ACVR1/RBM15/BMPR1A/NDST1/HES1/GATA3/TBX3/SMAD6/FZD2/SMAD7/BMPR2/SEMA3C/DHRS3/ENG/FRS2/TGFBR2/SOX4/HEY1/CHD7/SALL4/PROX1/TGFBR3/TGFB2/WNT5A/MIR17HG/HEY2/PAX8/SALL1/WNT11	37	32	ENSG00000173706/ENSG00000101384/ENSG00000162738/ENSG00000148400/ENSG00000134250/ENSG00000107882/ENSG00000115170/ENSG00000162775/ENSG00000107779/ENSG00000070614/ENSG00000114315/ENSG00000107485/ENSG00000137834/ENSG00000180340/ENSG00000101665/ENSG00000204217/ENSG00000075223/ENSG00000162496/ENSG00000106991/ENSG00000166225/ENSG00000163513/ENSG00000124766/ENSG00000164683/ENSG00000171316/ENSG00000101115…	5	ENSG00000164442/ENSG00000057657/ENSG00000135111/ENSG00000215417/ENSG00000125618
BP	GO:0000470	maturation of LSU-rRNA	14/3465	24/14357	0.000349845	0.0201231	ENSG00000136942/ENSG00000147604/ENSG00000047056/ENSG00000242372/ENSG00000145912/ENSG00000148303/ENSG00000198755/ENSG00000146223/ENSG00000067533/ENSG00000261236/ENSG00000100029/ENSG00000108592/ENSG00000197498/ENSG00000198042	RPL35/RPL7/WDR37/EIF6/NHP2/RPL7A/RPL10A/RPL7L1/RRP15/BOP1/PES1/FTSJ3/RPF2/MAK16	14	1	ENSG00000047056	13	ENSG00000136942/ENSG00000147604/ENSG00000242372/ENSG00000145912/ENSG00000148303/ENSG00000198755/ENSG00000146223/ENSG00000067533/ENSG00000261236/ENSG00000100029/ENSG00000108592/ENSG00000197498/ENSG00000198042
BP	GO:1901532	regulation of hematopoietic progenitor cell differentiation	42/3465	107/14357	0.000354199	0.0201718	ENSG00000165916/ENSG00000078900/ENSG00000143947/ENSG00000118058/ENSG00000148400/ENSG00000163041/ENSG00000013275/ENSG00000078747/ENSG00000159377/ENSG00000087191/ENSG00000101182/ENSG00000100804/ENSG00000274267/ENSG00000142507/ENSG00000126067/ENSG00000221983/ENSG00000097007/ENSG00000114315/ENSG00000150991/ENSG00000107485/ENSG00000099341/ENSG00000198728/ENSG00000277791/ENSG00000131467/ENSG00000278828…	PSMC3/TP73/RPS27A/KMT2A/NOTCH1/H3F3A/PSMC4/ITCH/PSMB4/PSMC5/PSMA7/PSMB5/HIST1H3B/PSMB6/PSMB2/UBA52/ABL1/HES1/UBC/GATA3/PSMD8/LDB1/PSMB3/PSME3/HIST1H3H/HIST1H3A/FNIP1/HIST1H4I/HIST1H4H/HIST1H3C/HIST1H3E/HIST1H4E/HES5/HIST2H3D/HIST1H4D/HIST1H3J/HIST1H4J/MYB/HIST1H3G/HIST2H4B/HIST1H4C/HIST1H4K	42	12	ENSG00000078900/ENSG00000118058/ENSG00000148400/ENSG00000078747/ENSG00000097007/ENSG00000114315/ENSG00000150991/ENSG00000107485/ENSG00000198728/ENSG00000217128/ENSG00000197921/ENSG00000118513	30	ENSG00000165916/ENSG00000143947/ENSG00000163041/ENSG00000013275/ENSG00000159377/ENSG00000087191/ENSG00000101182/ENSG00000100804/ENSG00000274267/ENSG00000142507/ENSG00000126067/ENSG00000221983/ENSG00000099341/ENSG00000277791/ENSG00000131467/ENSG00000278828/ENSG00000275714/ENSG00000276180/ENSG00000158406/ENSG00000278272/ENSG00000274750/ENSG00000276966/ENSG00000183598/ENSG00000277157/ENSG00000197153…
BP	GO:0044843	cell cycle G1/S phase transition	86/3465	256/14357	0.000360692	0.0203402	ENSG00000140465/ENSG00000115350/ENSG00000175793/ENSG00000146834/ENSG00000078900/ENSG00000100297/ENSG00000166483/ENSG00000148660/ENSG00000159388/ENSG00000143947/ENSG00000138767/ENSG00000099901/ENSG00000135503/ENSG00000150457/ENSG00000137154/ENSG00000172273/ENSG00000076003/ENSG00000109670/ENSG00000111276/ENSG00000135446/ENSG00000175215/ENSG00000137210/ENSG00000140464/ENSG00000151893/ENSG00000058668…	CYP1A1/POLE4/SFN/MEPCE/TP73/MCM5/WEE1/CAMK2G/BTG2/RPS27A/CNOT6L/RANBP1/ACVR1B/LATS2/RPS6/HINFP/MCM6/FBXW7/CDKN1B/CDK4/CTDSP2/TMEM14B/PML/CACUL1/ATP2B4/ACVR1/GIGYF2/MCM7/TP63/POLE3/UBA52/CAMK2A/CDK7/PIAS1/TAF1/CDC45/KANK2/ZPR1/UBC/PAF1/KMT2E/ARID3A/CCNA1/RPA3/CNOT8/BACH1/FBXO31/BRD4/ADAM17/TNKS1BP1/RPL26/LSM11/PSME3/PHF8/DBF4/RBL2/FAM83D/CCNA2/AURKA/PTEN/E2F1/DHFR/GTSE1/CASP2/GADD45A/CNOT4/RPS27L/…	86	54	ENSG00000140465/ENSG00000078900/ENSG00000166483/ENSG00000148660/ENSG00000159388/ENSG00000138767/ENSG00000135503/ENSG00000150457/ENSG00000172273/ENSG00000109670/ENSG00000111276/ENSG00000175215/ENSG00000140464/ENSG00000151893/ENSG00000058668/ENSG00000115170/ENSG00000204120/ENSG00000073282/ENSG00000070808/ENSG00000134058/ENSG00000033800/ENSG00000147133/ENSG00000197256/ENSG00000150991/ENSG00000005483…	32	ENSG00000115350/ENSG00000175793/ENSG00000146834/ENSG00000100297/ENSG00000143947/ENSG00000099901/ENSG00000137154/ENSG00000076003/ENSG00000135446/ENSG00000137210/ENSG00000166508/ENSG00000148229/ENSG00000221983/ENSG00000093009/ENSG00000109917/ENSG00000006712/ENSG00000133101/ENSG00000106399/ENSG00000161970/ENSG00000131467/ENSG00000101412/ENSG00000228716/ENSG00000116717/ENSG00000185088/ENSG00000147889…
BP	GO:0018149	peptide cross-linking	22/3465	46/14357	0.000392896	0.0217302	ENSG00000163216/ENSG00000203783/ENSG00000241794/ENSG00000203785/ENSG00000244094/ENSG00000169469/ENSG00000185966/ENSG00000184148/ENSG00000163202/ENSG00000169474/ENSG00000124102/ENSG00000143631/ENSG00000197084/ENSG00000240386/ENSG00000185962/ENSG00000163209/ENSG00000186226/ENSG00000198854/ENSG00000203784/ENSG00000163207/ENSG00000196734/ENSG00000196805	SPRR2D/PRR9/SPRR2A/SPRR2E/SPRR2F/SPRR1B/LCE3E/SPRR4/LCE3D/SPRR1A/PI3/FLG/LCE1C/LCE1F/LCE3A/SPRR3/LCE1E/C1orf68/LELP1/IVL/LCE1B/SPRR2B	22	0		22	ENSG00000163216/ENSG00000203783/ENSG00000241794/ENSG00000203785/ENSG00000244094/ENSG00000169469/ENSG00000185966/ENSG00000184148/ENSG00000163202/ENSG00000169474/ENSG00000124102/ENSG00000143631/ENSG00000197084/ENSG00000240386/ENSG00000185962/ENSG00000163209/ENSG00000186226/ENSG00000198854/ENSG00000203784/ENSG00000163207/ENSG00000196734/ENSG00000196805
BP	GO:0051290	protein heterotetramerization	22/3465	46/14357	0.000392896	0.0217302	ENSG00000111605/ENSG00000274267/ENSG00000196419/ENSG00000116120/ENSG00000278828/ENSG00000275714/ENSG00000179115/ENSG00000204228/ENSG00000139496/ENSG00000276180/ENSG00000158406/ENSG00000171105/ENSG00000278272/ENSG00000274750/ENSG00000276966/ENSG00000277157/ENSG00000197153/ENSG00000197238/ENSG00000273983/ENSG00000270276/ENSG00000197061/ENSG00000273542	CPSF6/HIST1H3B/XRCC6/FARSB/HIST1H3H/HIST1H3A/FARSA/HSD17B8/NUP58/HIST1H4I/HIST1H4H/INSR/HIST1H3C/HIST1H3E/HIST1H4E/HIST1H4D/HIST1H3J/HIST1H4J/HIST1H3G/HIST2H4B/HIST1H4C/HIST1H4K	22	2	ENSG00000139496/ENSG00000171105	20	ENSG00000111605/ENSG00000274267/ENSG00000196419/ENSG00000116120/ENSG00000278828/ENSG00000275714/ENSG00000179115/ENSG00000204228/ENSG00000276180/ENSG00000158406/ENSG00000278272/ENSG00000274750/ENSG00000276966/ENSG00000277157/ENSG00000197153/ENSG00000197238/ENSG00000273983/ENSG00000270276/ENSG00000197061/ENSG00000273542
BP	GO:0009126	purine nucleoside monophosphate metabolic process	101/3465	310/14357	0.000411836	0.0223479	ENSG00000168209/ENSG00000108179/ENSG00000198888/ENSG00000090266/ENSG00000164405/ENSG00000198763/ENSG00000147684/ENSG00000198931/ENSG00000198804/ENSG00000172115/ENSG00000143153/ENSG00000154723/ENSG00000116288/ENSG00000074800/ENSG00000198727/ENSG00000124172/ENSG00000147123/ENSG00000178035/ENSG00000189043/ENSG00000100300/ENSG00000145494/ENSG00000198712/ENSG00000168653/ENSG00000111669/ENSG00000159199…	DDIT4/PPIF/MT-ND1/NDUFB2/UQCRQ/MT-ND2/NDUFB9/APRT/MT-CO1/CYCS/ATP1B1/ATP5PF/PARK7/ENO1/MT-CYB/ATP5F1E/NDUFB11/IMPDH2/NDUFA4/TSPO/NDUFS6/MT-CO2/NDUFS5/TPI1/ATP5MC1/ATP5MF/COX4I1/COX6C/PPARGC1A/COX6A1/EIF6/NDUFA6/COX8A/NDUFB7/UQCC2/MT-CO3/COX5B/NDUFC2/UQCRH/ATP5PD/PGM2L1/NDUFA1/ATP5F1D/PKM/PGAM1/ARNT/NDUFA2/NDUFB10/NDUFB1/GUK1/NDUFA8/NDUFC1/NDUFA11/ATP5PB/ATP5MC3/NDUFAB1/ATP5ME/CYC1/COX7C/PGK1/SLC2…	101	17	ENSG00000168209/ENSG00000143153/ENSG00000109819/ENSG00000165434/ENSG00000143437/ENSG00000119139/ENSG00000186951/ENSG00000139496/ENSG00000006695/ENSG00000100644/ENSG00000114573/ENSG00000081026/ENSG00000171105/ENSG00000178127/ENSG00000165240/ENSG00000116039/ENSG00000135537	84	ENSG00000108179/ENSG00000198888/ENSG00000090266/ENSG00000164405/ENSG00000198763/ENSG00000147684/ENSG00000198931/ENSG00000198804/ENSG00000172115/ENSG00000154723/ENSG00000116288/ENSG00000074800/ENSG00000198727/ENSG00000124172/ENSG00000147123/ENSG00000178035/ENSG00000189043/ENSG00000100300/ENSG00000145494/ENSG00000198712/ENSG00000168653/ENSG00000111669/ENSG00000159199/ENSG00000241468/ENSG00000131143…
BP	GO:0009167	purine ribonucleoside monophosphate metabolic process	101/3465	310/14357	0.000411836	0.0223479	ENSG00000168209/ENSG00000108179/ENSG00000198888/ENSG00000090266/ENSG00000164405/ENSG00000198763/ENSG00000147684/ENSG00000198931/ENSG00000198804/ENSG00000172115/ENSG00000143153/ENSG00000154723/ENSG00000116288/ENSG00000074800/ENSG00000198727/ENSG00000124172/ENSG00000147123/ENSG00000178035/ENSG00000189043/ENSG00000100300/ENSG00000145494/ENSG00000198712/ENSG00000168653/ENSG00000111669/ENSG00000159199…	DDIT4/PPIF/MT-ND1/NDUFB2/UQCRQ/MT-ND2/NDUFB9/APRT/MT-CO1/CYCS/ATP1B1/ATP5PF/PARK7/ENO1/MT-CYB/ATP5F1E/NDUFB11/IMPDH2/NDUFA4/TSPO/NDUFS6/MT-CO2/NDUFS5/TPI1/ATP5MC1/ATP5MF/COX4I1/COX6C/PPARGC1A/COX6A1/EIF6/NDUFA6/COX8A/NDUFB7/UQCC2/MT-CO3/COX5B/NDUFC2/UQCRH/ATP5PD/PGM2L1/NDUFA1/ATP5F1D/PKM/PGAM1/ARNT/NDUFA2/NDUFB10/NDUFB1/GUK1/NDUFA8/NDUFC1/NDUFA11/ATP5PB/ATP5MC3/NDUFAB1/ATP5ME/CYC1/COX7C/PGK1/SLC2…	101	17	ENSG00000168209/ENSG00000143153/ENSG00000109819/ENSG00000165434/ENSG00000143437/ENSG00000119139/ENSG00000186951/ENSG00000139496/ENSG00000006695/ENSG00000100644/ENSG00000114573/ENSG00000081026/ENSG00000171105/ENSG00000178127/ENSG00000165240/ENSG00000116039/ENSG00000135537	84	ENSG00000108179/ENSG00000198888/ENSG00000090266/ENSG00000164405/ENSG00000198763/ENSG00000147684/ENSG00000198931/ENSG00000198804/ENSG00000172115/ENSG00000154723/ENSG00000116288/ENSG00000074800/ENSG00000198727/ENSG00000124172/ENSG00000147123/ENSG00000178035/ENSG00000189043/ENSG00000100300/ENSG00000145494/ENSG00000198712/ENSG00000168653/ENSG00000111669/ENSG00000159199/ENSG00000241468/ENSG00000131143…
BP	GO:0060840	artery development	31/3465	73/14357	0.000417914	0.0224658	ENSG00000108175/ENSG00000101384/ENSG00000106571/ENSG00000057657/ENSG00000138802/ENSG00000148400/ENSG00000107882/ENSG00000105991/ENSG00000107779/ENSG00000070614/ENSG00000114315/ENSG00000168214/ENSG00000167034/ENSG00000137834/ENSG00000125266/ENSG00000114739/ENSG00000101665/ENSG00000204217/ENSG00000130203/ENSG00000284485/ENSG00000106991/ENSG00000189079/ENSG00000124766/ENSG00000164683/ENSG00000171316…	ZMIZ1/JAG1/GLI3/PRDM1/SEC24B/NOTCH1/SUFU/HOXA1/BMPR1A/NDST1/HES1/RBPJ/NKX3-1/SMAD6/EFNB2/ACVR2B/SMAD7/BMPR2/APOE/MIR205/ENG/ARID2/SOX4/HEY1/CHD7/PROX1/TGFB2/FOLR1/DLL4/HEY2/WNT11	31	25	ENSG00000108175/ENSG00000101384/ENSG00000106571/ENSG00000138802/ENSG00000148400/ENSG00000107882/ENSG00000105991/ENSG00000107779/ENSG00000070614/ENSG00000114315/ENSG00000168214/ENSG00000137834/ENSG00000114739/ENSG00000101665/ENSG00000204217/ENSG00000284485/ENSG00000106991/ENSG00000189079/ENSG00000124766/ENSG00000164683/ENSG00000171316/ENSG00000117707/ENSG00000092969/ENSG00000135547/ENSG00000085741	6	ENSG00000057657/ENSG00000167034/ENSG00000125266/ENSG00000130203/ENSG00000110195/ENSG00000128917
BP	GO:0002011	morphogenesis of an epithelial sheet	24/3465	52/14357	0.000423375	0.0225486	ENSG00000113070/ENSG00000101384/ENSG00000160007/ENSG00000124782/ENSG00000125848/ENSG00000162738/ENSG00000148400/ENSG00000165322/ENSG00000204138/ENSG00000173402/ENSG00000074054/ENSG00000177697/ENSG00000070018/ENSG00000155366/ENSG00000151694/ENSG00000072415/ENSG00000171862/ENSG00000129474/ENSG00000161638/ENSG00000079385/ENSG00000262406/ENSG00000114251/ENSG00000128917/ENSG00000207870	HBEGF/JAG1/ARHGAP35/RREB1/FLRT3/VANGL2/NOTCH1/ARHGAP12/PHACTR4/DAG1/CLASP1/CD151/LRP6/RHOC/ADAM17/MPP5/PTEN/AJUBA/ITGA5/CEACAM1/MMP12/WNT5A/DLL4/MIR221	24	16	ENSG00000101384/ENSG00000160007/ENSG00000124782/ENSG00000162738/ENSG00000148400/ENSG00000165322/ENSG00000204138/ENSG00000173402/ENSG00000074054/ENSG00000070018/ENSG00000151694/ENSG00000072415/ENSG00000171862/ENSG00000161638/ENSG00000114251/ENSG00000207870	8	ENSG00000113070/ENSG00000125848/ENSG00000177697/ENSG00000155366/ENSG00000129474/ENSG00000079385/ENSG00000262406/ENSG00000128917
BP	GO:0048844	artery morphogenesis	25/3465	55/14357	0.000431979	0.0227958	ENSG00000108175/ENSG00000101384/ENSG00000057657/ENSG00000138802/ENSG00000148400/ENSG00000105991/ENSG00000107779/ENSG00000114315/ENSG00000168214/ENSG00000125266/ENSG00000101665/ENSG00000204217/ENSG00000130203/ENSG00000284485/ENSG00000106991/ENSG00000189079/ENSG00000124766/ENSG00000164683/ENSG00000171316/ENSG00000117707/ENSG00000092969/ENSG00000110195/ENSG00000128917/ENSG00000135547/ENSG00000085741	ZMIZ1/JAG1/PRDM1/SEC24B/NOTCH1/HOXA1/BMPR1A/HES1/RBPJ/EFNB2/SMAD7/BMPR2/APOE/MIR205/ENG/ARID2/SOX4/HEY1/CHD7/PROX1/TGFB2/FOLR1/DLL4/HEY2/WNT11	25	20	ENSG00000108175/ENSG00000101384/ENSG00000138802/ENSG00000148400/ENSG00000105991/ENSG00000107779/ENSG00000114315/ENSG00000168214/ENSG00000101665/ENSG00000204217/ENSG00000284485/ENSG00000106991/ENSG00000189079/ENSG00000124766/ENSG00000164683/ENSG00000171316/ENSG00000117707/ENSG00000092969/ENSG00000135547/ENSG00000085741	5	ENSG00000057657/ENSG00000125266/ENSG00000130203/ENSG00000110195/ENSG00000128917
BP	GO:2000736	regulation of stem cell differentiation	49/3465	131/14357	0.000457936	0.0239459	ENSG00000101384/ENSG00000165916/ENSG00000078900/ENSG00000143947/ENSG00000118058/ENSG00000148400/ENSG00000163041/ENSG00000013275/ENSG00000078747/ENSG00000159377/ENSG00000087191/ENSG00000101182/ENSG00000100804/ENSG00000274267/ENSG00000142507/ENSG00000126067/ENSG00000221983/ENSG00000097007/ENSG00000114315/ENSG00000150991/ENSG00000107485/ENSG00000099341/ENSG00000198728/ENSG00000277791/ENSG00000131467…	JAG1/PSMC3/TP73/RPS27A/KMT2A/NOTCH1/H3F3A/PSMC4/ITCH/PSMB4/PSMC5/PSMA7/PSMB5/HIST1H3B/PSMB6/PSMB2/UBA52/ABL1/HES1/UBC/GATA3/PSMD8/LDB1/PSMB3/PSME3/HIST1H3H/HIST1H3A/HIST1H4I/TACSTD2/LBH/KDM3A/HIST1H4H/SEMA3C/REST/HIST1H3C/HIST1H3E/HIST1H4E/HES5/HIST2H3D/HIST1H4D/HIST1H3J/HIST1H4J/TGFB2/TRIM6/MYB/HIST1H3G/HIST2H4B/HIST1H4C/HIST1H4K	49	18	ENSG00000101384/ENSG00000078900/ENSG00000118058/ENSG00000148400/ENSG00000078747/ENSG00000097007/ENSG00000114315/ENSG00000150991/ENSG00000107485/ENSG00000198728/ENSG00000213626/ENSG00000115548/ENSG00000075223/ENSG00000084093/ENSG00000197921/ENSG00000092969/ENSG00000121236/ENSG00000118513	31	ENSG00000165916/ENSG00000143947/ENSG00000163041/ENSG00000013275/ENSG00000159377/ENSG00000087191/ENSG00000101182/ENSG00000100804/ENSG00000274267/ENSG00000142507/ENSG00000126067/ENSG00000221983/ENSG00000099341/ENSG00000277791/ENSG00000131467/ENSG00000278828/ENSG00000275714/ENSG00000276180/ENSG00000184292/ENSG00000158406/ENSG00000278272/ENSG00000274750/ENSG00000276966/ENSG00000183598/ENSG00000277157…
BP	GO:0061844	antimicrobial humoral immune response mediated by antimicrobial peptide	19/3465	38/14357	0.000479725	0.0246903	ENSG00000156482/ENSG00000165799/ENSG00000184678/ENSG00000105372/ENSG00000125995/ENSG00000198918/ENSG00000167754/ENSG00000111640/ENSG00000273802/ENSG00000197903/ENSG00000143556/ENSG00000163220/ENSG00000124875/ENSG00000274290/ENSG00000163221/ENSG00000278588/ENSG00000124635/ENSG00000164825/ENSG00000124233	RPL30/RNASE7/HIST2H2BE/RPS19/ROMO1/RPL39/KLK5/GAPDH/HIST1H2BG/HIST1H2BK/S100A7/S100A9/CXCL6/HIST1H2BE/S100A12/HIST1H2BI/HIST1H2BJ/DEFB1/SEMG1	19	1	ENSG00000124635	18	ENSG00000156482/ENSG00000165799/ENSG00000184678/ENSG00000105372/ENSG00000125995/ENSG00000198918/ENSG00000167754/ENSG00000111640/ENSG00000273802/ENSG00000197903/ENSG00000143556/ENSG00000163220/ENSG00000124875/ENSG00000274290/ENSG00000163221/ENSG00000278588/ENSG00000164825/ENSG00000124233
BP	GO:0003171	atrioventricular valve development	13/3465	22/14357	0.000480758	0.0246903	ENSG00000148400/ENSG00000115170/ENSG00000169242/ENSG00000107779/ENSG00000137834/ENSG00000204217/ENSG00000163513/ENSG00000124766/ENSG00000164683/ENSG00000122691/ENSG00000166341/ENSG00000092969/ENSG00000135547	NOTCH1/ACVR1/EFNA1/BMPR1A/SMAD6/BMPR2/TGFBR2/SOX4/HEY1/TWIST1/DCHS1/TGFB2/HEY2	13	12	ENSG00000148400/ENSG00000115170/ENSG00000169242/ENSG00000107779/ENSG00000137834/ENSG00000204217/ENSG00000163513/ENSG00000124766/ENSG00000164683/ENSG00000122691/ENSG00000092969/ENSG00000135547	1	ENSG00000166341
BP	GO:0071496	cellular response to external stimulus	92/3465	280/14357	0.000533364	0.0271496	ENSG00000175592/ENSG00000019186/ENSG00000172936/ENSG00000133056/ENSG00000073756/ENSG00000126775/ENSG00000175895/ENSG00000177169/ENSG00000137193/ENSG00000160007/ENSG00000084207/ENSG00000067182/ENSG00000172071/ENSG00000136943/ENSG00000130956/ENSG00000141682/ENSG00000128272/ENSG00000150907/ENSG00000254087/ENSG00000001084/ENSG00000179958/ENSG00000197442/ENSG00000117394/ENSG00000110395/ENSG00000142168…	FOSL1/CYP24A1/MYD88/PIK3C2B/PTGS2/ATG14/PLEKHF2/ULK1/PIM1/ARHGAP35/GSTP1/TNFRSF1A/EIF2AK3/CTSV/HABP4/PMAIP1/ATF4/FOXO1/LYN/GCLC/DCTPP1/MAP3K5/SLC2A1/CBL/SOD1/MAP3K1/MAP3K14/DAG1/NUAK2/CYBA/ZFYVE1/SREBF1/RNF152/NUDT1/BCL11A/TSC1/FOS/TAF1/ITGA2/KANK2/IL1B/IRF1/USF1/SLC39A4/AMBRA1/ASNS/COMT/VDR/SESN1/MAP3K2/BCL10/SESN3/SLC38A2/SNAI2/KPTN/BMT2/DEPDC5/MAP1LC3A/GLUL/XBP1/BAK1/FNIP1/ATF3/TNFRSF10B/MTMR3…	92	61	ENSG00000019186/ENSG00000133056/ENSG00000126775/ENSG00000175895/ENSG00000177169/ENSG00000137193/ENSG00000160007/ENSG00000067182/ENSG00000172071/ENSG00000130956/ENSG00000150907/ENSG00000254087/ENSG00000001084/ENSG00000197442/ENSG00000117394/ENSG00000110395/ENSG00000095015/ENSG00000006062/ENSG00000173402/ENSG00000163545/ENSG00000165861/ENSG00000072310/ENSG00000176641/ENSG00000119866/ENSG00000165699…	31	ENSG00000175592/ENSG00000172936/ENSG00000073756/ENSG00000084207/ENSG00000136943/ENSG00000141682/ENSG00000128272/ENSG00000179958/ENSG00000142168/ENSG00000051523/ENSG00000106268/ENSG00000125538/ENSG00000147804/ENSG00000070669/ENSG00000093010/ENSG00000019549/ENSG00000118162/ENSG00000101460/ENSG00000100219/ENSG00000162772/ENSG00000116717/ENSG00000183696/ENSG00000002330/ENSG00000177606/ENSG00000171522…
BP	GO:0007548	sex differentiation	74/3465	217/14357	0.00055072	0.0277872	ENSG00000129194/ENSG00000128564/ENSG00000205213/ENSG00000123131/ENSG00000112972/ENSG00000164442/ENSG00000121858/ENSG00000070404/ENSG00000136943/ENSG00000135503/ENSG00000137075/ENSG00000054267/ENSG00000186792/ENSG00000110395/ENSG00000142168/ENSG00000124733/ENSG00000104899/ENSG00000167487/ENSG00000144747/ENSG00000073282/ENSG00000106268/ENSG00000163659/ENSG00000113658/ENSG00000032219/ENSG00000107779…	SOX15/VGF/LGR4/PRDX4/HMGCS1/CITED2/TNFSF10/FSTL3/CTSV/ACVR1B/RNF38/ARID4B/HYAL3/CBL/SOD1/MEA1/AMH/KLHL26/TMF1/TP63/NUDT1/TIPARP/SMAD5/ARID4A/BMPR1A/WDR48/BIK/FNDC3A/FOXO3/SIX4/ERCC1/ZP3/GATA3/LRP6/CST3/LHFPL2/TBX3/ARID5B/PBX1/BAK1/NKX3-1/HOXA9/NIPBL/HMGB2/ADAMTS1/CASP2/TBC1D20/SEMA3A/SRC/KIF18A/TEX19/WNT2B/INHBA/TFAP2C/INSR/BMPR1B/CHD7/ACVR2A/EREG/LHX1/MAMLD1/NUP210L/HOXA11/INHA/ING2/TGFB2/WNT5A/…	74	51	ENSG00000205213/ENSG00000112972/ENSG00000121858/ENSG00000135503/ENSG00000137075/ENSG00000054267/ENSG00000110395/ENSG00000167487/ENSG00000144747/ENSG00000073282/ENSG00000163659/ENSG00000113658/ENSG00000032219/ENSG00000107779/ENSG00000114742/ENSG00000102531/ENSG00000118689/ENSG00000100625/ENSG00000107485/ENSG00000070018/ENSG00000145685/ENSG00000150347/ENSG00000185630/ENSG00000030110/ENSG00000078399…	23	ENSG00000129194/ENSG00000128564/ENSG00000123131/ENSG00000164442/ENSG00000070404/ENSG00000136943/ENSG00000186792/ENSG00000142168/ENSG00000124733/ENSG00000104899/ENSG00000106268/ENSG00000100290/ENSG00000012061/ENSG00000188372/ENSG00000101439/ENSG00000135111/ENSG00000167034/ENSG00000154734/ENSG00000122641/ENSG00000143552/ENSG00000005073/ENSG00000057468/ENSG00000177398
BP	GO:0071396	cellular response to lipid	151/3465	495/14357	0.000593091	0.0296649	ENSG00000136244/ENSG00000117318/ENSG00000115009/ENSG00000168209/ENSG00000019186/ENSG00000124151/ENSG00000156804/ENSG00000183779/ENSG00000186480/ENSG00000170776/ENSG00000164032/ENSG00000178913/ENSG00000119138/ENSG00000112972/ENSG00000164463/ENSG00000137193/ENSG00000057657/ENSG00000136848/ENSG00000169429/ENSG00000130164/ENSG00000084207/ENSG00000143816/ENSG00000006025/ENSG00000120899/ENSG00000188910…	IL6/ID3/CCL20/DDIT4/CYP24A1/NCOA3/FBXO32/ZNF703/INSIG1/AKAP13/H2AFZ/TAF7/KLF9/HMGCS1/CREBRF/PIM1/PRDM1/DAB2IP/CXCL8/LDLR/GSTP1/WNT9A/OSBPL7/PTK2B/GJB3/RAN/EDN1/FOXO1/LYN/PARK7/NR4A3/NME1/PAQR7/RXRA/RBFOX2/ABHD2/EFNA5/TSPO/CSF2/WNT7B/CDK4/DAG1/PPARGC1A/ADNP2/CRY2/SREBF1/TP63/PGRMC2/PTCH1/CDK7/PHB/ABL1/PIAS1/TAF1/IL24/PPARD/NR3C1/ITGA2/KANK2/IL1B/FOXO3/KMT2D/ARNTL/RORA/PAF1/CRY1/IRAK1/LRP6/VDR/IRAK…	151	104	ENSG00000117318/ENSG00000168209/ENSG00000019186/ENSG00000124151/ENSG00000156804/ENSG00000186480/ENSG00000170776/ENSG00000119138/ENSG00000112972/ENSG00000164463/ENSG00000137193/ENSG00000136848/ENSG00000130164/ENSG00000143816/ENSG00000006025/ENSG00000120899/ENSG00000150907/ENSG00000254087/ENSG00000182749/ENSG00000186350/ENSG00000100320/ENSG00000140526/ENSG00000184349/ENSG00000188064/ENSG00000173402…	47	ENSG00000136244/ENSG00000115009/ENSG00000183779/ENSG00000164032/ENSG00000178913/ENSG00000057657/ENSG00000169429/ENSG00000084207/ENSG00000188910/ENSG00000132341/ENSG00000078401/ENSG00000116288/ENSG00000119508/ENSG00000239672/ENSG00000100300/ENSG00000164400/ENSG00000135446/ENSG00000167085/ENSG00000162892/ENSG00000125538/ENSG00000006712/ENSG00000184216/ENSG00000019549/ENSG00000104825/ENSG00000198840…
BP	GO:0014020	primary neural tube formation	36/3465	90/14357	0.000598898	0.0296971	ENSG00000147050/ENSG00000160007/ENSG00000172757/ENSG00000138802/ENSG00000162738/ENSG00000171863/ENSG00000107882/ENSG00000204138/ENSG00000138771/ENSG00000108518/ENSG00000166145/ENSG00000185920/ENSG00000165699/ENSG00000097007/ENSG00000125850/ENSG00000164741/ENSG00000070018/ENSG00000142867/ENSG00000167642/ENSG00000083307/ENSG00000181555/ENSG00000120868/ENSG00000168758/ENSG00000180340/ENSG00000175104…	KDM6A/ARHGAP35/CFL1/SEC24B/VANGL2/RPS7/SUFU/PHACTR4/SHROOM3/PFN1/SPINT1/PTCH1/TSC1/ABL1/OVOL2/DLC1/LRP6/BCL10/SPINT2/GRHL2/SETD2/APAF1/SEMA4C/FZD2/TRAF6/HIF1A/ADM/ARID1A/SALL4/TWIST1/GRHL3/TGFB2/WNT5A/FOLR1/SKI/NODAL	36	31	ENSG00000147050/ENSG00000160007/ENSG00000138802/ENSG00000162738/ENSG00000107882/ENSG00000204138/ENSG00000138771/ENSG00000166145/ENSG00000185920/ENSG00000165699/ENSG00000097007/ENSG00000125850/ENSG00000164741/ENSG00000070018/ENSG00000142867/ENSG00000083307/ENSG00000181555/ENSG00000120868/ENSG00000168758/ENSG00000180340/ENSG00000175104/ENSG00000100644/ENSG00000148926/ENSG00000117713/ENSG00000101115…	5	ENSG00000172757/ENSG00000171863/ENSG00000108518/ENSG00000167642/ENSG00000110195
BP	GO:0031667	response to nutrient levels	123/3465	393/14357	0.000637208	0.0313267	ENSG00000019186/ENSG00000133056/ENSG00000140465/ENSG00000128564/ENSG00000073756/ENSG00000126775/ENSG00000184502/ENSG00000101670/ENSG00000175895/ENSG00000112972/ENSG00000177169/ENSG00000113161/ENSG00000177000/ENSG00000137193/ENSG00000130164/ENSG00000084207/ENSG00000113739/ENSG00000172071/ENSG00000136943/ENSG00000141682/ENSG00000128272/ENSG00000150907/ENSG00000010310/ENSG00000001084/ENSG00000197442…	CYP24A1/PIK3C2B/CYP1A1/VGF/PTGS2/ATG14/GAST/LIPG/PLEKHF2/HMGCS1/ULK1/HMGCR/MTHFR/PIM1/LDLR/GSTP1/STC2/EIF2AK3/CTSV/PMAIP1/ATF4/FOXO1/GIPR/GCLC/MAP3K5/SLC2A1/MT-CYB/CBL/SOD1/TSPO/COX4I1/NUAK2/PPARGC1A/CYBA/ZFYVE1/SREBF1/DAD1/RNF152/NQO1/BCL11A/TSC1/TAF1/KDM4A/PKM/PPARD/ITGA2/KANK2/IL1B/ACSL3/FOXO3/ADIPOR2/USF1/ACSL4/SLC39A4/AMBRA1/ASNS/COMT/ERCC1/NENF/CST3/VDR/SESN1/BCL10/SESN3/SLC38A2/SLC16A1/DNM…	123	73	ENSG00000019186/ENSG00000133056/ENSG00000140465/ENSG00000126775/ENSG00000101670/ENSG00000175895/ENSG00000112972/ENSG00000177169/ENSG00000113161/ENSG00000177000/ENSG00000137193/ENSG00000130164/ENSG00000172071/ENSG00000150907/ENSG00000010310/ENSG00000001084/ENSG00000197442/ENSG00000117394/ENSG00000110395/ENSG00000163545/ENSG00000109819/ENSG00000165861/ENSG00000072310/ENSG00000176641/ENSG00000119866…	50	ENSG00000128564/ENSG00000073756/ENSG00000184502/ENSG00000084207/ENSG00000113739/ENSG00000136943/ENSG00000141682/ENSG00000128272/ENSG00000198727/ENSG00000142168/ENSG00000100300/ENSG00000131143/ENSG00000051523/ENSG00000129562/ENSG00000181019/ENSG00000067225/ENSG00000125538/ENSG00000147804/ENSG00000070669/ENSG00000093010/ENSG00000012061/ENSG00000117691/ENSG00000101439/ENSG00000019549/ENSG00000148339…
BP	GO:0006091	generation of precursor metabolites and energy	141/3465	459/14357	0.000644988	0.0314404	ENSG00000168209/ENSG00000170955/ENSG00000108179/ENSG00000128564/ENSG00000198888/ENSG00000090266/ENSG00000164405/ENSG00000198763/ENSG00000131069/ENSG00000147684/ENSG00000198804/ENSG00000172115/ENSG00000198668/ENSG00000154723/ENSG00000082701/ENSG00000143947/ENSG00000169230/ENSG00000116288/ENSG00000119508/ENSG00000010310/ENSG00000112695/ENSG00000074800/ENSG00000198727/ENSG00000124172/ENSG00000147123…	DDIT4/CAVIN3/PPIF/VGF/MT-ND1/NDUFB2/UQCRQ/MT-ND2/ACSS2/NDUFB9/MT-CO1/CYCS/CALM1/ATP5PF/GSK3B/RPS27A/PRELID1/PARK7/NR4A3/GIPR/COX7A2/ENO1/MT-CYB/ATP5F1E/NDUFB11/SLC25A12/NDUFA4/SLC25A4/PHLDA2/NDUFS6/MT-CO2/NDUFS5/TPI1/ATP5MC1/ATP5MF/GFPT1/COX4I1/COX6C/PPARGC1A/COX6A1/CYBA/EIF6/NDUFA6/COX8A/NHLRC1/NDUFB7/UQCC2/UBA52/MT-CO3/COX5B/NDUFC2/SH3BGRL3/UQCRH/ATP5PD/PPP1CA/STK40/PGM2L1/NDUFA1/ETFB/ATP5F1D/P…	141	29	ENSG00000168209/ENSG00000131069/ENSG00000082701/ENSG00000010310/ENSG00000115840/ENSG00000198380/ENSG00000109819/ENSG00000196182/ENSG00000165434/ENSG00000143437/ENSG00000112033/ENSG00000150991/ENSG00000132326/ENSG00000198431/ENSG00000186951/ENSG00000139496/ENSG00000006695/ENSG00000023287/ENSG00000100644/ENSG00000162496/ENSG00000121879/ENSG00000171105/ENSG00000178127/ENSG00000106459/ENSG00000127334…	112	ENSG00000170955/ENSG00000108179/ENSG00000128564/ENSG00000198888/ENSG00000090266/ENSG00000164405/ENSG00000198763/ENSG00000147684/ENSG00000198804/ENSG00000172115/ENSG00000198668/ENSG00000154723/ENSG00000143947/ENSG00000169230/ENSG00000116288/ENSG00000119508/ENSG00000112695/ENSG00000074800/ENSG00000198727/ENSG00000124172/ENSG00000147123/ENSG00000189043/ENSG00000151729/ENSG00000181649/ENSG00000145494…
BP	GO:0045860	positive regulation of protein kinase activity	140/3465	456/14357	0.000690211	0.0333621	ENSG00000107984/ENSG00000170776/ENSG00000065361/ENSG00000177283/ENSG00000078900/ENSG00000136848/ENSG00000198668/ENSG00000006432/ENSG00000120899/ENSG00000162738/ENSG00000143947/ENSG00000078401/ENSG00000164327/ENSG00000137818/ENSG00000116288/ENSG00000110514/ENSG00000101109/ENSG00000107968/ENSG00000198909/ENSG00000197442/ENSG00000139318/ENSG00000142168/ENSG00000141503/ENSG00000163932/ENSG00000146192…	DKK1/AKAP13/ERBB3/FZD8/TP73/DAB2IP/CALM1/MAP3K9/PTK2B/VANGL2/RPS27A/EDN1/RICTOR/RPLP1/PARK7/MADD/STK4/MAP3K8/MAP3K3/MAP3K5/DUSP6/SOD1/MINK1/PRKCD/FGD2/RPS3/NAB2/EFNA5/MAP3K1/TIAM1/FBXW7/CDKN1B/WNT7B/MAP3K14/TXN/DAG1/CACUL1/ATP2B4/INAVA/LPAR3/EGR1/UBA52/CEMIP/EFNA1/WNK1/ABL1/ETAA1/TNIK/IL1B/XRCC6/MAP3K21/UBC/PTPN1/MAP2K7/NOD1/IRAK1/IL23A/MAP3K2/CSPG4/IRAK2/ADAM17/TELO2/MAPKAPK2/TAB2/ITGB1BP1/MAP4K…	140	105	ENSG00000170776/ENSG00000065361/ENSG00000078900/ENSG00000136848/ENSG00000006432/ENSG00000120899/ENSG00000162738/ENSG00000164327/ENSG00000110514/ENSG00000101109/ENSG00000107968/ENSG00000198909/ENSG00000197442/ENSG00000141503/ENSG00000163932/ENSG00000166886/ENSG00000184349/ENSG00000095015/ENSG00000156299/ENSG00000109670/ENSG00000111276/ENSG00000188064/ENSG00000006062/ENSG00000173402/ENSG00000151893…	35	ENSG00000107984/ENSG00000177283/ENSG00000198668/ENSG00000143947/ENSG00000078401/ENSG00000137818/ENSG00000116288/ENSG00000139318/ENSG00000142168/ENSG00000146192/ENSG00000149273/ENSG00000136810/ENSG00000221983/ENSG00000125538/ENSG00000196419/ENSG00000184216/ENSG00000110944/ENSG00000100726/ENSG00000119185/ENSG00000164885/ENSG00000185338/ENSG00000104872/ENSG00000167034/ENSG00000129474/ENSG00000120885…
BP	GO:0044706	multi-multicellular organism process	64/3465	184/14357	0.000704232	0.0337562	ENSG00000175592/ENSG00000140465/ENSG00000073756/ENSG00000087494/ENSG00000057657/ENSG00000130726/ENSG00000113739/ENSG00000136943/ENSG00000078401/ENSG00000100985/ENSG00000135503/ENSG00000186350/ENSG00000186792/ENSG00000117394/ENSG00000142168/ENSG00000102265/ENSG00000170345/ENSG00000112033/ENSG00000164171/ENSG00000125538/ENSG00000172270/ENSG00000133794/ENSG00000006831/ENSG00000162244/ENSG00000068366…	FOSL1/CYP1A1/PTGS2/PTHLH/PRDM1/TRIM28/STC2/CTSV/EDN1/MMP9/ACVR1B/RXRA/HYAL3/SLC2A1/SOD1/TIMP1/FOS/PPARD/ITGA2/IL1B/BSG/ARNTL/ADIPOR2/RPL29/ACSL4/COMT/CST3/VDR/AKR1B1/SLC38A2/IGFBP7/TEAD3/NAMPT/PLA2G4B/PSG1/ASH1L/ARHGDIB/KRAS/PSG7/SP3/PTAFR/KPNA6/PSG6/BMPR2/LNPEP/ADM/ADRA2B/SCGB1A1/ARID1A/TGFBR2/BYSL/CLDN4/PSG5/KALRN/ACVR2A/PSG9/UMPS/PSG4/STC1/PSG2/IGFBP2/NODAL/SEMG1/PSG11	64	29	ENSG00000140465/ENSG00000135503/ENSG00000186350/ENSG00000117394/ENSG00000170345/ENSG00000112033/ENSG00000164171/ENSG00000133794/ENSG00000006831/ENSG00000068366/ENSG00000111424/ENSG00000134294/ENSG00000007866/ENSG00000105835/ENSG00000243708/ENSG00000116539/ENSG00000133703/ENSG00000172845/ENSG00000169403/ENSG00000025800/ENSG00000204217/ENSG00000113441/ENSG00000148926/ENSG00000274286/ENSG00000117713…	35	ENSG00000175592/ENSG00000073756/ENSG00000087494/ENSG00000057657/ENSG00000130726/ENSG00000113739/ENSG00000136943/ENSG00000078401/ENSG00000100985/ENSG00000186792/ENSG00000142168/ENSG00000102265/ENSG00000125538/ENSG00000172270/ENSG00000162244/ENSG00000093010/ENSG00000101439/ENSG00000085662/ENSG00000163453/ENSG00000231924/ENSG00000111348/ENSG00000221878/ENSG00000170848/ENSG00000149021/ENSG00000112578…
BP	GO:0051056	regulation of small GTPase mediated signal transduction	102/3465	318/14357	0.000712455	0.0338681	ENSG00000170776/ENSG00000104140/ENSG00000163947/ENSG00000008256/ENSG00000008323/ENSG00000143878/ENSG00000134215/ENSG00000074964/ENSG00000107554/ENSG00000105738/ENSG00000108669/ENSG00000266028/ENSG00000136848/ENSG00000160007/ENSG00000040608/ENSG00000196220/ENSG00000125733/ENSG00000241484/ENSG00000110514/ENSG00000174292/ENSG00000148400/ENSG00000165322/ENSG00000120063/ENSG00000134250/ENSG00000158321…	AKAP13/RHOV/ARHGEF3/CYTH3/PLEKHG6/RHOB/VAV3/ARHGEF10L/DNMBP/SIPA1L3/CYTH1/SRGAP2/DAB2IP/ARHGAP35/RTN4R/SRGAP3/TRIP10/ARHGAP8/MADD/TNK1/NOTCH1/ARHGAP12/GNA13/NOTCH2/AUTS2/ARHGAP23/FGD2/FGD4/TIAM1/ARHGAP21/MET/FGD6/SPATA13/ASAP2/ARHGEF4/ARHGAP5/ARFGAP3/ARHGAP29/ABL1/ARHGDIA/DYNLT1/RASAL2/EPS8/ARHGAP42/PLEKHG3/RASA2/DLC1/RHOD/ACAP1/BCL6/RHOC/EPHB2/ARHGEF12/ARHGAP32/ASAP1/RHOF/ARFGEF2/RALGPS1/ARHGEF2…	102	88	ENSG00000170776/ENSG00000104140/ENSG00000163947/ENSG00000008256/ENSG00000008323/ENSG00000134215/ENSG00000074964/ENSG00000107554/ENSG00000105738/ENSG00000108669/ENSG00000266028/ENSG00000136848/ENSG00000160007/ENSG00000040608/ENSG00000196220/ENSG00000125733/ENSG00000241484/ENSG00000110514/ENSG00000148400/ENSG00000165322/ENSG00000120063/ENSG00000134250/ENSG00000158321/ENSG00000275832/ENSG00000139132…	14	ENSG00000143878/ENSG00000174292/ENSG00000146192/ENSG00000141522/ENSG00000146425/ENSG00000173156/ENSG00000072818/ENSG00000155366/ENSG00000139725/ENSG00000111348/ENSG00000130203/ENSG00000059915/ENSG00000189056/ENSG00000058335
BP	GO:0045815	positive regulation of gene expression, epigenetic	31/3465	75/14357	0.000729815	0.034409	ENSG00000075624/ENSG00000163041/ENSG00000177700/ENSG00000147669/ENSG00000274267/ENSG00000049618/ENSG00000197724/ENSG00000166012/ENSG00000171453/ENSG00000100142/ENSG00000172943/ENSG00000278828/ENSG00000275714/ENSG00000117877/ENSG00000276180/ENSG00000158406/ENSG00000119778/ENSG00000100393/ENSG00000117713/ENSG00000278272/ENSG00000274750/ENSG00000276966/ENSG00000183598/ENSG00000277157/ENSG00000197153…	ACTB/H3F3A/POLR2L/POLR2K/HIST1H3B/ARID1B/PHF2/TAF1D/POLR1C/POLR2F/PHF8/HIST1H3H/HIST1H3A/CD3EAP/HIST1H4I/HIST1H4H/ATAD2B/EP300/ARID1A/HIST1H3C/HIST1H3E/HIST1H4E/HIST2H3D/HIST1H4D/HIST1H3J/HIST1H4J/HIST1H3G/HIST2H4B/HIST1H4C/PADI2/HIST1H4K	31	8	ENSG00000049618/ENSG00000197724/ENSG00000166012/ENSG00000172943/ENSG00000119778/ENSG00000100393/ENSG00000117713/ENSG00000117115	23	ENSG00000075624/ENSG00000163041/ENSG00000177700/ENSG00000147669/ENSG00000274267/ENSG00000171453/ENSG00000100142/ENSG00000278828/ENSG00000275714/ENSG00000117877/ENSG00000276180/ENSG00000158406/ENSG00000278272/ENSG00000274750/ENSG00000276966/ENSG00000183598/ENSG00000277157/ENSG00000197153/ENSG00000197238/ENSG00000273983/ENSG00000270276/ENSG00000197061/ENSG00000273542
BP	GO:2000027	regulation of organ morphogenesis	74/3465	219/14357	0.000741791	0.0344106	ENSG00000198742/ENSG00000124813/ENSG00000107984/ENSG00000205213/ENSG00000164442/ENSG00000137193/ENSG00000165916/ENSG00000138802/ENSG00000162738/ENSG00000143947/ENSG00000078401/ENSG00000198807/ENSG00000186350/ENSG00000100592/ENSG00000148400/ENSG00000013275/ENSG00000159377/ENSG00000087191/ENSG00000101182/ENSG00000156299/ENSG00000109670/ENSG00000100804/ENSG00000137203/ENSG00000115170/ENSG00000142507…	SMURF1/RUNX2/DKK1/LGR4/CITED2/PIM1/PSMC3/SEC24B/VANGL2/RPS27A/EDN1/PAX9/RXRA/DAAM1/NOTCH1/PSMC4/PSMB4/PSMC5/PSMA7/TIAM1/FBXW7/PSMB5/TFAP2A/ACVR1/PSMB6/PFN1/PSMB2/UBA52/BMPR1A/ABL1/HES1/UBC/SIX4/GATA3/VDR/PSMD8/RBPJ/SNAI2/PSMB3/CELSR2/PSME3/XBP1/TNFRSF11B/MLLT3/ZNRF3/TACSTD2/FZD2/GNG5/BTBD7/BMPR2/SEMA3C/WNT2B/ENG/DACT1/FRS2/TGFBR2/NFIB/TWIST1/CEACAM1/LHX1/CHAD/PRICKLE2/GRHL3/AMTN/BCOR/HOXA11/TGFB2…	74	46	ENSG00000198742/ENSG00000124813/ENSG00000205213/ENSG00000137193/ENSG00000138802/ENSG00000162738/ENSG00000198807/ENSG00000186350/ENSG00000100592/ENSG00000148400/ENSG00000156299/ENSG00000109670/ENSG00000137203/ENSG00000115170/ENSG00000107779/ENSG00000097007/ENSG00000114315/ENSG00000150991/ENSG00000100625/ENSG00000107485/ENSG00000111424/ENSG00000168214/ENSG00000143126/ENSG00000171843/ENSG00000183579…	28	ENSG00000107984/ENSG00000164442/ENSG00000165916/ENSG00000143947/ENSG00000078401/ENSG00000013275/ENSG00000159377/ENSG00000087191/ENSG00000101182/ENSG00000100804/ENSG00000142507/ENSG00000108518/ENSG00000126067/ENSG00000221983/ENSG00000099341/ENSG00000019549/ENSG00000277791/ENSG00000131467/ENSG00000100219/ENSG00000164761/ENSG00000184292/ENSG00000174021/ENSG00000079385/ENSG00000187689/ENSG00000005073…
BP	GO:0060317	cardiac epithelial to mesenchymal transition	15/3465	28/14357	0.000744859	0.0344106	ENSG00000124216/ENSG00000148400/ENSG00000115170/ENSG00000169242/ENSG00000168214/ENSG00000019549/ENSG00000106991/ENSG00000163513/ENSG00000164683/ENSG00000122691/ENSG00000069702/ENSG00000092969/ENSG00000135547/ENSG00000164056/ENSG00000163132	SNAI1/NOTCH1/ACVR1/EFNA1/RBPJ/SNAI2/ENG/TGFBR2/HEY1/TWIST1/TGFBR3/TGFB2/HEY2/SPRY1/MSX1	15	12	ENSG00000148400/ENSG00000115170/ENSG00000169242/ENSG00000168214/ENSG00000106991/ENSG00000163513/ENSG00000164683/ENSG00000122691/ENSG00000069702/ENSG00000092969/ENSG00000135547/ENSG00000164056	3	ENSG00000124216/ENSG00000019549/ENSG00000163132
BP	GO:0009161	ribonucleoside monophosphate metabolic process	103/3465	322/14357	0.000747795	0.0344106	ENSG00000168209/ENSG00000108179/ENSG00000198888/ENSG00000090266/ENSG00000164405/ENSG00000198763/ENSG00000147684/ENSG00000198931/ENSG00000198804/ENSG00000172115/ENSG00000143153/ENSG00000154723/ENSG00000116288/ENSG00000074800/ENSG00000198727/ENSG00000124172/ENSG00000147123/ENSG00000178035/ENSG00000189043/ENSG00000100300/ENSG00000145494/ENSG00000198712/ENSG00000168653/ENSG00000111669/ENSG00000159199…	DDIT4/PPIF/MT-ND1/NDUFB2/UQCRQ/MT-ND2/NDUFB9/APRT/MT-CO1/CYCS/ATP1B1/ATP5PF/PARK7/ENO1/MT-CYB/ATP5F1E/NDUFB11/IMPDH2/NDUFA4/TSPO/NDUFS6/MT-CO2/NDUFS5/TPI1/ATP5MC1/ATP5MF/COX4I1/COX6C/PPARGC1A/COX6A1/EIF6/NDUFA6/COX8A/NDUFB7/UQCC2/MT-CO3/COX5B/NDUFC2/UQCRH/ATP5PD/PGM2L1/NDUFA1/ATP5F1D/PKM/PGAM1/ARNT/NDUFA2/NDUFB10/NDUFB1/GUK1/NDUFA8/NDUFC1/NDUFA11/ATP5PB/ATP5MC3/NDUFAB1/ATP5ME/CYC1/COX7C/PGK1/SLC2…	103	17	ENSG00000168209/ENSG00000143153/ENSG00000109819/ENSG00000165434/ENSG00000143437/ENSG00000119139/ENSG00000186951/ENSG00000139496/ENSG00000006695/ENSG00000100644/ENSG00000114573/ENSG00000081026/ENSG00000171105/ENSG00000178127/ENSG00000165240/ENSG00000116039/ENSG00000135537	86	ENSG00000108179/ENSG00000198888/ENSG00000090266/ENSG00000164405/ENSG00000198763/ENSG00000147684/ENSG00000198931/ENSG00000198804/ENSG00000172115/ENSG00000154723/ENSG00000116288/ENSG00000074800/ENSG00000198727/ENSG00000124172/ENSG00000147123/ENSG00000178035/ENSG00000189043/ENSG00000100300/ENSG00000145494/ENSG00000198712/ENSG00000168653/ENSG00000111669/ENSG00000159199/ENSG00000241468/ENSG00000131143…
BP	GO:0046546	development of primary male sexual characteristics	44/3465	117/14357	0.000763792	0.0348677	ENSG00000129194/ENSG00000123131/ENSG00000112972/ENSG00000164442/ENSG00000121858/ENSG00000070404/ENSG00000136943/ENSG00000137075/ENSG00000054267/ENSG00000110395/ENSG00000124733/ENSG00000167487/ENSG00000144747/ENSG00000106268/ENSG00000032219/ENSG00000114742/ENSG00000100290/ENSG00000102531/ENSG00000100625/ENSG00000012061/ENSG00000107485/ENSG00000101439/ENSG00000145685/ENSG00000150347/ENSG00000167034…	SOX15/PRDX4/HMGCS1/CITED2/TNFSF10/FSTL3/CTSV/RNF38/ARID4B/CBL/MEA1/KLHL26/TMF1/NUDT1/ARID4A/WDR48/BIK/FNDC3A/SIX4/ERCC1/GATA3/CST3/LHFPL2/ARID5B/NKX3-1/HOXA9/HMGB2/TBC1D20/SEMA3A/KIF18A/TEX19/WNT2B/INHBA/TFAP2C/INSR/ACVR2A/MAMLD1/NUP210L/HOXA11/INHA/ING2/TGFB2/WNT5A/FGF9	44	30	ENSG00000112972/ENSG00000121858/ENSG00000137075/ENSG00000054267/ENSG00000110395/ENSG00000167487/ENSG00000144747/ENSG00000032219/ENSG00000114742/ENSG00000102531/ENSG00000100625/ENSG00000107485/ENSG00000145685/ENSG00000150347/ENSG00000078399/ENSG00000164104/ENSG00000125875/ENSG00000075213/ENSG00000121621/ENSG00000182459/ENSG00000134245/ENSG00000087510/ENSG00000171105/ENSG00000121989/ENSG00000013619…	14	ENSG00000129194/ENSG00000123131/ENSG00000164442/ENSG00000070404/ENSG00000136943/ENSG00000124733/ENSG00000106268/ENSG00000100290/ENSG00000012061/ENSG00000101439/ENSG00000167034/ENSG00000122641/ENSG00000143552/ENSG00000005073
BP	GO:0036294	cellular response to decreased oxygen levels	65/3465	188/14357	0.000770013	0.0348749	ENSG00000073756/ENSG00000164442/ENSG00000165916/ENSG00000113739/ENSG00000143947/ENSG00000141682/ENSG00000078401/ENSG00000148400/ENSG00000013275/ENSG00000074800/ENSG00000110395/ENSG00000159377/ENSG00000087191/ENSG00000101182/ENSG00000114023/ENSG00000167136/ENSG00000100804/ENSG00000106153/ENSG00000109819/ENSG00000142507/ENSG00000120738/ENSG00000126067/ENSG00000221983/ENSG00000168140/ENSG00000165699…	PTGS2/CITED2/PSMC3/STC2/RPS27A/PMAIP1/EDN1/NOTCH1/PSMC4/ENO1/CBL/PSMB4/PSMC5/PSMA7/FAM162A/ENDOG/PSMB5/CHCHD2/PPARGC1A/PSMB6/EGR1/PSMB2/UBA52/VASN/TSC1/ARNT/PPARD/FOXO3/RORA/UBC/EPAS1/IRAK1/BACH1/PGK1/PSMD8/RBPJ/ELOB/DNMT3A/CPEB2/PSMB3/EEF2K/PSME3/CCNA2/NKX3-1/PTEN/E2F1/AJUBA/SLC2A4/SRC/HIF1A/BAD/HIPK2/HIGD1A/EP300/ZFP36L1/MDM4/PDK3/CPEB4/PRKCE/TWIST1/ATP7A/HILPDA/EGLN2/STC1/TIGAR	65	31	ENSG00000148400/ENSG00000110395/ENSG00000109819/ENSG00000120738/ENSG00000165699/ENSG00000143437/ENSG00000112033/ENSG00000118689/ENSG00000069667/ENSG00000150991/ENSG00000116016/ENSG00000156273/ENSG00000168214/ENSG00000119772/ENSG00000137449/ENSG00000103319/ENSG00000145386/ENSG00000171862/ENSG00000181856/ENSG00000197122/ENSG00000100644/ENSG00000064393/ENSG00000100393/ENSG00000185650/ENSG00000198625…	34	ENSG00000073756/ENSG00000164442/ENSG00000165916/ENSG00000113739/ENSG00000143947/ENSG00000141682/ENSG00000078401/ENSG00000013275/ENSG00000074800/ENSG00000159377/ENSG00000087191/ENSG00000101182/ENSG00000114023/ENSG00000167136/ENSG00000100804/ENSG00000106153/ENSG00000142507/ENSG00000126067/ENSG00000221983/ENSG00000168140/ENSG00000184216/ENSG00000102144/ENSG00000099341/ENSG00000103363/ENSG00000277791…
BP	GO:0046661	male sex differentiation	49/3465	134/14357	0.000827008	0.0371637	ENSG00000129194/ENSG00000205213/ENSG00000123131/ENSG00000112972/ENSG00000164442/ENSG00000121858/ENSG00000070404/ENSG00000136943/ENSG00000137075/ENSG00000054267/ENSG00000110395/ENSG00000124733/ENSG00000104899/ENSG00000167487/ENSG00000144747/ENSG00000106268/ENSG00000113658/ENSG00000032219/ENSG00000107779/ENSG00000114742/ENSG00000100290/ENSG00000102531/ENSG00000100625/ENSG00000012061/ENSG00000107485…	SOX15/LGR4/PRDX4/HMGCS1/CITED2/TNFSF10/FSTL3/CTSV/RNF38/ARID4B/CBL/MEA1/AMH/KLHL26/TMF1/NUDT1/SMAD5/ARID4A/BMPR1A/WDR48/BIK/FNDC3A/SIX4/ERCC1/GATA3/CST3/LHFPL2/TBX3/ARID5B/NKX3-1/HOXA9/HMGB2/TBC1D20/SEMA3A/KIF18A/TEX19/WNT2B/INHBA/TFAP2C/INSR/ACVR2A/MAMLD1/NUP210L/HOXA11/INHA/ING2/TGFB2/WNT5A/FGF9	49	33	ENSG00000205213/ENSG00000112972/ENSG00000121858/ENSG00000137075/ENSG00000054267/ENSG00000110395/ENSG00000167487/ENSG00000144747/ENSG00000113658/ENSG00000032219/ENSG00000107779/ENSG00000114742/ENSG00000102531/ENSG00000100625/ENSG00000107485/ENSG00000145685/ENSG00000150347/ENSG00000078399/ENSG00000164104/ENSG00000125875/ENSG00000075213/ENSG00000121621/ENSG00000182459/ENSG00000134245/ENSG00000087510…	16	ENSG00000129194/ENSG00000123131/ENSG00000164442/ENSG00000070404/ENSG00000136943/ENSG00000124733/ENSG00000104899/ENSG00000106268/ENSG00000100290/ENSG00000012061/ENSG00000101439/ENSG00000135111/ENSG00000167034/ENSG00000122641/ENSG00000143552/ENSG00000005073
BP	GO:0006163	purine nucleotide metabolic process	147/3465	484/14357	0.000852594	0.0377459	ENSG00000168209/ENSG00000108179/ENSG00000198888/ENSG00000090266/ENSG00000164405/ENSG00000198763/ENSG00000147684/ENSG00000087494/ENSG00000198931/ENSG00000113161/ENSG00000198804/ENSG00000172115/ENSG00000198668/ENSG00000143153/ENSG00000154723/ENSG00000120899/ENSG00000132341/ENSG00000116288/ENSG00000239672/ENSG00000233276/ENSG00000125877/ENSG00000074800/ENSG00000171723/ENSG00000198727/ENSG00000124172…	DDIT4/PPIF/MT-ND1/NDUFB2/UQCRQ/MT-ND2/NDUFB9/PTHLH/APRT/HMGCR/MT-CO1/CYCS/CALM1/ATP1B1/ATP5PF/PTK2B/RAN/PARK7/NME1/GPX1/ITPA/ENO1/GPHN/MT-CYB/ATP5F1E/HINT1/NDUFB11/MBIP/IMPDH2/NDUFA4/TSPO/NDUFS6/MT-CO2/NDUFS5/PDE7A/TPI1/ATP5MC1/ATP5MF/COX4I1/COX6C/DCAKD/PPARGC1A/COX6A1/EIF6/NDUFA6/COX8A/NDUFB7/NUDT1/UQCC2/MT-CO3/COX5B/NDUFC2/UQCRH/ATP5PD/DNPH1/PGM2L1/NDUFA1/NME2/ATP5F1D/PKM/PGAM1/PODXL2/ARNT/NDUF…	147	43	ENSG00000168209/ENSG00000113161/ENSG00000143153/ENSG00000120899/ENSG00000171723/ENSG00000151332/ENSG00000205268/ENSG00000172992/ENSG00000109819/ENSG00000165434/ENSG00000143437/ENSG00000069667/ENSG00000131473/ENSG00000120137/ENSG00000157881/ENSG00000119139/ENSG00000162104/ENSG00000186951/ENSG00000139496/ENSG00000006695/ENSG00000180340/ENSG00000213906/ENSG00000100644/ENSG00000101126/ENSG00000138271…	104	ENSG00000108179/ENSG00000198888/ENSG00000090266/ENSG00000164405/ENSG00000198763/ENSG00000147684/ENSG00000087494/ENSG00000198931/ENSG00000198804/ENSG00000172115/ENSG00000198668/ENSG00000154723/ENSG00000132341/ENSG00000116288/ENSG00000239672/ENSG00000233276/ENSG00000125877/ENSG00000074800/ENSG00000198727/ENSG00000124172/ENSG00000169567/ENSG00000147123/ENSG00000178035/ENSG00000189043/ENSG00000100300…
BP	GO:0048863	stem cell differentiation	78/3465	234/14357	0.000853089	0.0377459	ENSG00000008083/ENSG00000124813/ENSG00000173575/ENSG00000101384/ENSG00000165916/ENSG00000078900/ENSG00000172757/ENSG00000185033/ENSG00000143947/ENSG00000078401/ENSG00000118058/ENSG00000166197/ENSG00000148400/ENSG00000163041/ENSG00000013275/ENSG00000078747/ENSG00000159377/ENSG00000087191/ENSG00000101182/ENSG00000204138/ENSG00000100804/ENSG00000274267/ENSG00000001617/ENSG00000115170/ENSG00000090776…	JARID2/RUNX2/CHD2/JAG1/PSMC3/TP73/CFL1/SEMA4B/RPS27A/EDN1/KMT2A/NOLC1/NOTCH1/H3F3A/PSMC4/ITCH/PSMB4/PSMC5/PSMA7/PHACTR4/PSMB5/HIST1H3B/SEMA3F/ACVR1/EFNB1/TP63/PSMB6/PSMB2/UBA52/BMPR1A/ABL1/OVOL2/MTF2/HES1/UBC/GATA3/LRP6/PSMD8/RBPJ/LDB1/SNAI2/PSMB3/PSME3/HIST1H3H/HIST1H3A/HIST1H4I/SETD2/PUM1/TACSTD2/SEMA4C/LBH/SEMA3A/KDM3A/HIF1A/HIST1H4H/EPOP/SEMA3C/REST/HIST1H3C/TWIST1/HIST1H3E/HIST1H4E/HES5/HIST…	78	38	ENSG00000008083/ENSG00000124813/ENSG00000173575/ENSG00000101384/ENSG00000078900/ENSG00000185033/ENSG00000118058/ENSG00000148400/ENSG00000078747/ENSG00000204138/ENSG00000001617/ENSG00000115170/ENSG00000090776/ENSG00000073282/ENSG00000107779/ENSG00000097007/ENSG00000125850/ENSG00000143033/ENSG00000114315/ENSG00000150991/ENSG00000107485/ENSG00000070018/ENSG00000168214/ENSG00000198728/ENSG00000181555…	40	ENSG00000165916/ENSG00000172757/ENSG00000143947/ENSG00000078401/ENSG00000166197/ENSG00000163041/ENSG00000013275/ENSG00000159377/ENSG00000087191/ENSG00000101182/ENSG00000100804/ENSG00000274267/ENSG00000142507/ENSG00000126067/ENSG00000221983/ENSG00000099341/ENSG00000019549/ENSG00000277791/ENSG00000131467/ENSG00000278828/ENSG00000275714/ENSG00000276180/ENSG00000184292/ENSG00000158406/ENSG00000273604…
BP	GO:0002385	mucosal immune response	13/3465	23/14357	0.000862257	0.0378603	ENSG00000184678/ENSG00000264522/ENSG00000198918/ENSG00000185436/ENSG00000273802/ENSG00000197903/ENSG00000140297/ENSG00000274290/ENSG00000278588/ENSG00000124635/ENSG00000126262/ENSG00000183709/ENSG00000164825	HIST2H2BE/OTUD7B/RPL39/IFNLR1/HIST1H2BG/HIST1H2BK/GCNT3/HIST1H2BE/HIST1H2BI/HIST1H2BJ/FFAR2/IFNL2/DEFB1	13	4	ENSG00000264522/ENSG00000185436/ENSG00000140297/ENSG00000124635	9	ENSG00000184678/ENSG00000198918/ENSG00000273802/ENSG00000197903/ENSG00000274290/ENSG00000278588/ENSG00000126262/ENSG00000183709/ENSG00000164825
BP	GO:0071453	cellular response to oxygen levels	69/3465	203/14357	0.000917793	0.0399935	ENSG00000073756/ENSG00000164442/ENSG00000165916/ENSG00000113739/ENSG00000143947/ENSG00000141682/ENSG00000078401/ENSG00000150907/ENSG00000148400/ENSG00000013275/ENSG00000074800/ENSG00000110395/ENSG00000159377/ENSG00000087191/ENSG00000101182/ENSG00000114023/ENSG00000167136/ENSG00000100804/ENSG00000106153/ENSG00000109819/ENSG00000142507/ENSG00000120738/ENSG00000126067/ENSG00000221983/ENSG00000168140…	PTGS2/CITED2/PSMC3/STC2/RPS27A/PMAIP1/EDN1/FOXO1/NOTCH1/PSMC4/ENO1/CBL/PSMB4/PSMC5/PSMA7/FAM162A/ENDOG/PSMB5/CHCHD2/PPARGC1A/PSMB6/EGR1/PSMB2/UBA52/VASN/TSC1/ARNT/PPARD/FOXO3/RORA/UBC/EPAS1/IRAK1/BACH1/PGK1/PSMD8/RBPJ/ELOB/DNMT3A/CPEB2/PSMB3/EEF2K/PSME3/CCNA2/NKX3-1/PTEN/E2F1/AJUBA/SLC2A4/DNMT3B/SRC/HIF1A/BAD/HIPK2/ATP6V1A/HIGD1A/EP300/ZFP36L1/LPAR1/MDM4/PDK3/CPEB4/PRKCE/TWIST1/ATP7A/HILPDA/EGLN2…	69	35	ENSG00000150907/ENSG00000148400/ENSG00000110395/ENSG00000109819/ENSG00000120738/ENSG00000165699/ENSG00000143437/ENSG00000112033/ENSG00000118689/ENSG00000069667/ENSG00000150991/ENSG00000116016/ENSG00000156273/ENSG00000168214/ENSG00000119772/ENSG00000137449/ENSG00000103319/ENSG00000145386/ENSG00000171862/ENSG00000181856/ENSG00000088305/ENSG00000197122/ENSG00000100644/ENSG00000064393/ENSG00000114573…	34	ENSG00000073756/ENSG00000164442/ENSG00000165916/ENSG00000113739/ENSG00000143947/ENSG00000141682/ENSG00000078401/ENSG00000013275/ENSG00000074800/ENSG00000159377/ENSG00000087191/ENSG00000101182/ENSG00000114023/ENSG00000167136/ENSG00000100804/ENSG00000106153/ENSG00000142507/ENSG00000126067/ENSG00000221983/ENSG00000168140/ENSG00000184216/ENSG00000102144/ENSG00000099341/ENSG00000103363/ENSG00000277791…
BP	GO:0031331	positive regulation of cellular catabolic process	100/3465	313/14357	0.000925846	0.0400411	ENSG00000198742/ENSG00000100596/ENSG00000177169/ENSG00000051108/ENSG00000165916/ENSG00000136848/ENSG00000116514/ENSG00000130164/ENSG00000006025/ENSG00000159388/ENSG00000082701/ENSG00000120899/ENSG00000150907/ENSG00000138767/ENSG00000116288/ENSG00000001084/ENSG00000013275/ENSG00000078747/ENSG00000163932/ENSG00000087191/ENSG00000198382/ENSG00000196730/ENSG00000109670/ENSG00000167136/ENSG00000105401…	SMURF1/SPTLC2/ULK1/HERPUD1/PSMC3/DAB2IP/RNF19B/LDLR/OSBPL7/BTG2/GSK3B/PTK2B/FOXO1/CNOT6L/PARK7/GCLC/PSMC4/ITCH/PRKCD/PSMC5/UVRAG/DAPK1/FBXW7/ENDOG/CDC37/TOMM7/GIGYF2/SNX33/RNF152/ARIH1/RAB12/FMR1/UQCC2/POLR2G/TSC1/LONRF1/PIAS1/TAF1/ARNT/RNF217/IL1B/RNF19A/RNF144B/HSPBP1/RC3H1/PTPN1/NOD1/AMBRA1/CNOT8/EDEM1/SESN1/SESN3/QKI/BCAP31/ATP5IF1/STK11/TNRC6B/TP53INP1/XBP1/AURKA/PIK3CB/PPARA/TRIB1/PTEN/DXO/…	100	76	ENSG00000198742/ENSG00000100596/ENSG00000177169/ENSG00000051108/ENSG00000136848/ENSG00000116514/ENSG00000130164/ENSG00000006025/ENSG00000159388/ENSG00000082701/ENSG00000120899/ENSG00000150907/ENSG00000138767/ENSG00000001084/ENSG00000078747/ENSG00000163932/ENSG00000198382/ENSG00000196730/ENSG00000109670/ENSG00000204120/ENSG00000173548/ENSG00000176641/ENSG00000166233/ENSG00000206418/ENSG00000102081…	24	ENSG00000165916/ENSG00000116288/ENSG00000013275/ENSG00000087191/ENSG00000167136/ENSG00000105401/ENSG00000196683/ENSG00000137288/ENSG00000168002/ENSG00000125538/ENSG00000133265/ENSG00000185825/ENSG00000130770/ENSG00000100219/ENSG00000173334/ENSG00000204348/ENSG00000080824/ENSG00000101997/ENSG00000120885/ENSG00000002330/ENSG00000130203/ENSG00000116299/ENSG00000198168/ENSG00000167588
BP	GO:0019827	stem cell population maintenance	50/3465	138/14357	0.000933872	0.0400868	ENSG00000124151/ENSG00000101384/ENSG00000162738/ENSG00000150907/ENSG00000148400/ENSG00000116128/ENSG00000134250/ENSG00000177700/ENSG00000147669/ENSG00000073282/ENSG00000168002/ENSG00000107779/ENSG00000143033/ENSG00000114315/ENSG00000102978/ENSG00000118689/ENSG00000006712/ENSG00000116016/ENSG00000186174/ENSG00000135111/ENSG00000168214/ENSG00000198728/ENSG00000100142/ENSG00000178764/ENSG00000087087…	NCOA3/JAG1/VANGL2/FOXO1/NOTCH1/BCL9/NOTCH2/POLR2L/POLR2K/TP63/POLR2G/BMPR1A/MTF2/HES1/POLR2C/FOXO3/PAF1/EPAS1/BCL9L/TBX3/RBPJ/LDB1/POLR2F/ZHX2/SRRT/PBX1/EPHA1/NIPBL/RTF1/TUT4/LBH/KDM3A/HOOK3/BRAF/ZNF322/ARID1A/SOX4/EIF4ENIF1/SOX2/SALL4/METTL14/HES5/PROX1/MMP24/SKI/DDX6/NODAL/PAX8/SALL1/HNF1B	50	39	ENSG00000124151/ENSG00000101384/ENSG00000162738/ENSG00000150907/ENSG00000148400/ENSG00000116128/ENSG00000134250/ENSG00000073282/ENSG00000107779/ENSG00000143033/ENSG00000114315/ENSG00000118689/ENSG00000116016/ENSG00000186174/ENSG00000168214/ENSG00000198728/ENSG00000178764/ENSG00000185630/ENSG00000146904/ENSG00000164190/ENSG00000137815/ENSG00000134744/ENSG00000213626/ENSG00000115548/ENSG00000168172…	11	ENSG00000177700/ENSG00000147669/ENSG00000168002/ENSG00000102978/ENSG00000006712/ENSG00000135111/ENSG00000100142/ENSG00000087087/ENSG00000125966/ENSG00000125618/ENSG00000275410
BP	GO:0045137	development of primary sexual characteristics	62/3465	179/14357	0.00095398	0.0406466	ENSG00000129194/ENSG00000128564/ENSG00000123131/ENSG00000112972/ENSG00000164442/ENSG00000121858/ENSG00000070404/ENSG00000136943/ENSG00000135503/ENSG00000137075/ENSG00000054267/ENSG00000186792/ENSG00000110395/ENSG00000142168/ENSG00000124733/ENSG00000104899/ENSG00000167487/ENSG00000144747/ENSG00000106268/ENSG00000163659/ENSG00000032219/ENSG00000114742/ENSG00000100290/ENSG00000102531/ENSG00000118689…	SOX15/VGF/PRDX4/HMGCS1/CITED2/TNFSF10/FSTL3/CTSV/ACVR1B/RNF38/ARID4B/HYAL3/CBL/SOD1/MEA1/AMH/KLHL26/TMF1/NUDT1/TIPARP/ARID4A/WDR48/BIK/FNDC3A/FOXO3/SIX4/ERCC1/ZP3/GATA3/CST3/LHFPL2/ARID5B/NKX3-1/HOXA9/HMGB2/ADAMTS1/CASP2/TBC1D20/SEMA3A/SRC/KIF18A/TEX19/WNT2B/INHBA/TFAP2C/INSR/BMPR1B/ACVR2A/EREG/MAMLD1/NUP210L/HOXA11/INHA/ING2/TGFB2/WNT5A/MSH4/SALL1/NRIP1/FGF9/GDF9/UMODL1	62	40	ENSG00000112972/ENSG00000121858/ENSG00000135503/ENSG00000137075/ENSG00000054267/ENSG00000110395/ENSG00000167487/ENSG00000144747/ENSG00000163659/ENSG00000032219/ENSG00000114742/ENSG00000102531/ENSG00000118689/ENSG00000100625/ENSG00000107485/ENSG00000145685/ENSG00000150347/ENSG00000078399/ENSG00000164104/ENSG00000106144/ENSG00000125875/ENSG00000075213/ENSG00000197122/ENSG00000121621/ENSG00000182459…	22	ENSG00000129194/ENSG00000128564/ENSG00000123131/ENSG00000164442/ENSG00000070404/ENSG00000136943/ENSG00000186792/ENSG00000142168/ENSG00000124733/ENSG00000104899/ENSG00000106268/ENSG00000100290/ENSG00000012061/ENSG00000188372/ENSG00000101439/ENSG00000167034/ENSG00000154734/ENSG00000122641/ENSG00000143552/ENSG00000005073/ENSG00000057468/ENSG00000177398
BP	GO:0003206	cardiac chamber morphogenesis	40/3465	105/14357	0.00096978	0.041016	ENSG00000173706/ENSG00000101384/ENSG00000164442/ENSG00000162738/ENSG00000186350/ENSG00000148400/ENSG00000134250/ENSG00000115170/ENSG00000162775/ENSG00000107779/ENSG00000125850/ENSG00000114315/ENSG00000107485/ENSG00000135111/ENSG00000168214/ENSG00000112414/ENSG00000083307/ENSG00000137834/ENSG00000154734/ENSG00000180340/ENSG00000100644/ENSG00000101665/ENSG00000204217/ENSG00000075223/ENSG00000162496…	HEG1/JAG1/CITED2/VANGL2/RXRA/NOTCH1/NOTCH2/ACVR1/RBM15/BMPR1A/OVOL2/HES1/GATA3/TBX3/RBPJ/ADGRG6/GRHL2/SMAD6/ADAMTS1/FZD2/HIF1A/SMAD7/BMPR2/SEMA3C/DHRS3/ENG/TGFBR2/SOX4/HEY1/CHD7/TNNT2/PROX1/TGFBR3/TGFB2/WNT5A/DLL4/MIR17HG/HEY2/TNNI1/WNT11	40	34	ENSG00000173706/ENSG00000101384/ENSG00000162738/ENSG00000186350/ENSG00000148400/ENSG00000134250/ENSG00000115170/ENSG00000162775/ENSG00000107779/ENSG00000125850/ENSG00000114315/ENSG00000107485/ENSG00000168214/ENSG00000112414/ENSG00000083307/ENSG00000137834/ENSG00000180340/ENSG00000100644/ENSG00000101665/ENSG00000204217/ENSG00000075223/ENSG00000162496/ENSG00000106991/ENSG00000163513/ENSG00000124766…	6	ENSG00000164442/ENSG00000135111/ENSG00000154734/ENSG00000128917/ENSG00000215417/ENSG00000159173
BP	GO:0045682	regulation of epidermis development	30/3465	73/14357	0.000987407	0.0414567	ENSG00000124151/ENSG00000134363/ENSG00000175793/ENSG00000136943/ENSG00000148400/ENSG00000166886/ENSG00000134317/ENSG00000073282/ENSG00000185920/ENSG00000027075/ENSG00000243678/ENSG00000112033/ENSG00000125850/ENSG00000114315/ENSG00000109101/ENSG00000111424/ENSG00000128422/ENSG00000083307/ENSG00000138386/ENSG00000162601/ENSG00000162891/ENSG00000185650/ENSG00000128016/ENSG00000143387/ENSG00000197921…	NCOA3/FST/SFN/CTSV/NOTCH1/NAB2/GRHL1/TP63/PTCH1/PRKCH/NME2/PPARD/OVOL2/HES1/FOXN1/VDR/KRT17/GRHL2/NAB1/MYSM1/IL20/ZFP36L1/ZFP36/CTSK/HES5/PTCH2/TGFB2/WNT5A/HEY2/KRT36	30	22	ENSG00000124151/ENSG00000148400/ENSG00000166886/ENSG00000134317/ENSG00000073282/ENSG00000185920/ENSG00000027075/ENSG00000112033/ENSG00000125850/ENSG00000114315/ENSG00000109101/ENSG00000111424/ENSG00000083307/ENSG00000138386/ENSG00000162601/ENSG00000185650/ENSG00000128016/ENSG00000143387/ENSG00000197921/ENSG00000092969/ENSG00000114251/ENSG00000135547	8	ENSG00000134363/ENSG00000175793/ENSG00000136943/ENSG00000243678/ENSG00000128422/ENSG00000162891/ENSG00000117425/ENSG00000126337
BP	GO:0006334	nucleosome assembly	46/3465	125/14357	0.00100627	0.0419424	ENSG00000188486/ENSG00000184678/ENSG00000048649/ENSG00000163041/ENSG00000083168/ENSG00000175792/ENSG00000274267/ENSG00000189060/ENSG00000196890/ENSG00000158373/ENSG00000145241/ENSG00000100162/ENSG00000156650/ENSG00000123485/ENSG00000128708/ENSG00000278828/ENSG00000275714/ENSG00000273802/ENSG00000197903/ENSG00000276180/ENSG00000104147/ENSG00000164104/ENSG00000158406/ENSG00000129534/ENSG00000275713…	H2AFX/HIST2H2BE/RSF1/H3F3A/KAT6A/RUVBL1/HIST1H3B/H1F0/HIST3H2BB/HIST1H2BD/CENPC/CENPM/KAT6B/HJURP/HAT1/HIST1H3H/HIST1H3A/HIST1H2BG/HIST1H2BK/HIST1H4I/OIP5/HMGB2/HIST1H4H/MIS18BP1/HIST1H2BH/SART3/HIST1H2BE/HIST1H3C/HIST1H3E/GRWD1/HIST1H4E/HIST2H3D/HIST1H4D/CENPL/IPO4/HIST1H3J/CENPS/HIST1H2BI/HIST1H4J/HIST1H2BJ/HIST1H3G/HIST2H4B/NAP1L5/HIST1H4C/HIST1H4K/HIST1H2BL	46	11	ENSG00000048649/ENSG00000083168/ENSG00000189060/ENSG00000145241/ENSG00000156650/ENSG00000123485/ENSG00000164104/ENSG00000129534/ENSG00000075856/ENSG00000120334/ENSG00000124635	35	ENSG00000188486/ENSG00000184678/ENSG00000163041/ENSG00000175792/ENSG00000274267/ENSG00000196890/ENSG00000158373/ENSG00000100162/ENSG00000128708/ENSG00000278828/ENSG00000275714/ENSG00000273802/ENSG00000197903/ENSG00000276180/ENSG00000104147/ENSG00000158406/ENSG00000275713/ENSG00000274290/ENSG00000278272/ENSG00000274750/ENSG00000105447/ENSG00000276966/ENSG00000183598/ENSG00000277157/ENSG00000196497…
BP	GO:0044783	G1 DNA damage checkpoint	29/3465	70/14357	0.00102195	0.0422897	ENSG00000175793/ENSG00000078900/ENSG00000159388/ENSG00000143947/ENSG00000138767/ENSG00000111276/ENSG00000140464/ENSG00000204120/ENSG00000073282/ENSG00000221983/ENSG00000150991/ENSG00000116017/ENSG00000155508/ENSG00000103264/ENSG00000149115/ENSG00000161970/ENSG00000103479/ENSG00000087586/ENSG00000101412/ENSG00000075218/ENSG00000106144/ENSG00000116717/ENSG00000080802/ENSG00000185088/ENSG00000095787…	SFN/TP73/BTG2/RPS27A/CNOT6L/CDKN1B/PML/GIGYF2/TP63/UBA52/UBC/ARID3A/CNOT8/FBXO31/TNKS1BP1/RPL26/RBL2/AURKA/E2F1/GTSE1/CASP2/GADD45A/CNOT4/RPS27L/WAC/EP300/SOX4/MDM4/E2F8	29	22	ENSG00000078900/ENSG00000159388/ENSG00000138767/ENSG00000111276/ENSG00000140464/ENSG00000204120/ENSG00000073282/ENSG00000150991/ENSG00000116017/ENSG00000155508/ENSG00000103264/ENSG00000149115/ENSG00000103479/ENSG00000087586/ENSG00000075218/ENSG00000106144/ENSG00000080802/ENSG00000095787/ENSG00000100393/ENSG00000124766/ENSG00000198625/ENSG00000129173	7	ENSG00000175793/ENSG00000143947/ENSG00000221983/ENSG00000161970/ENSG00000101412/ENSG00000116717/ENSG00000185088
BP	GO:0051403	stress-activated MAPK cascade	81/3465	246/14357	0.00103414	0.0424882	ENSG00000118523/ENSG00000081913/ENSG00000135960/ENSG00000095370/ENSG00000107984/ENSG00000113161/ENSG00000177283/ENSG00000078900/ENSG00000136848/ENSG00000140443/ENSG00000084207/ENSG00000006432/ENSG00000120899/ENSG00000162738/ENSG00000143947/ENSG00000078401/ENSG00000150907/ENSG00000132522/ENSG00000107968/ENSG00000198909/ENSG00000197442/ENSG00000078747/ENSG00000141503/ENSG00000146192/ENSG00000149273…	CTGF/PHLPP1/EDAR/SH2D3C/DKK1/HMGCR/FZD8/TP73/DAB2IP/IGF1R/GSTP1/MAP3K9/PTK2B/VANGL2/RPS27A/EDN1/FOXO1/GPS2/MAP3K8/MAP3K3/MAP3K5/ITCH/MINK1/FGD2/RPS3/TIAM1/WNT7B/RAP2A/INAVA/FBXW11/UBA52/DUSP10/TNIK/IL1B/MAP3K21/UBC/PTPN1/MAP2K7/NOD1/IRAK1/MID1/MAP3K2/IRAK2/SH3RF1/MAPKAPK2/TAB2/MAP4K3/BTRC/TAOK1/TRIB1/TAOK3/RB1CC1/SEMA4C/TAB3/CRKL/GADD45A/TRAF6/SEMA3A/HIPK2/AXIN1/DACT1/PTGER4/CARD9/MAGI3/SASH1/ZFP…	81	64	ENSG00000081913/ENSG00000135960/ENSG00000095370/ENSG00000113161/ENSG00000078900/ENSG00000136848/ENSG00000140443/ENSG00000006432/ENSG00000120899/ENSG00000162738/ENSG00000150907/ENSG00000107968/ENSG00000198909/ENSG00000197442/ENSG00000078747/ENSG00000141503/ENSG00000156299/ENSG00000188064/ENSG00000125249/ENSG00000163362/ENSG00000072803/ENSG00000143507/ENSG00000154310/ENSG00000143674/ENSG00000150991…	17	ENSG00000118523/ENSG00000107984/ENSG00000177283/ENSG00000084207/ENSG00000143947/ENSG00000078401/ENSG00000132522/ENSG00000146192/ENSG00000149273/ENSG00000221983/ENSG00000125538/ENSG00000184216/ENSG00000173334/ENSG00000116717/ENSG00000171522/ENSG00000187796/ENSG00000099860
BP	GO:0009896	positive regulation of catabolic process	114/3465	365/14357	0.00106953	0.0436307	ENSG00000198742/ENSG00000100596/ENSG00000177169/ENSG00000051108/ENSG00000165916/ENSG00000136848/ENSG00000116514/ENSG00000130164/ENSG00000006025/ENSG00000159388/ENSG00000082701/ENSG00000120899/ENSG00000150907/ENSG00000138767/ENSG00000116288/ENSG00000001084/ENSG00000013275/ENSG00000078747/ENSG00000163932/ENSG00000087191/ENSG00000198382/ENSG00000104904/ENSG00000196730/ENSG00000109670/ENSG00000167136…	SMURF1/SPTLC2/ULK1/HERPUD1/PSMC3/DAB2IP/RNF19B/LDLR/OSBPL7/BTG2/GSK3B/PTK2B/FOXO1/CNOT6L/PARK7/GCLC/PSMC4/ITCH/PRKCD/PSMC5/UVRAG/OAZ1/DAPK1/FBXW7/ENDOG/CDKN1B/CDC37/TOMM7/GIGYF2/SNX33/RNF152/ARIH1/RAB12/FMR1/TIPARP/UQCC2/POLR2G/TSC1/LONRF1/PIAS1/TAF1/ARNT/RNF217/IL1B/RNF19A/RNF144B/HSPBP1/RC3H1/PTPN1/NOD1/AMBRA1/CNOT8/EDEM1/SESN1/SESN3/RHBDD3/QKI/BCAP31/ATP5IF1/STK11/TNRC6B/TP53INP1/XBP1/AURKA/WW…	114	87	ENSG00000198742/ENSG00000100596/ENSG00000177169/ENSG00000051108/ENSG00000136848/ENSG00000116514/ENSG00000130164/ENSG00000006025/ENSG00000159388/ENSG00000082701/ENSG00000120899/ENSG00000150907/ENSG00000138767/ENSG00000001084/ENSG00000078747/ENSG00000163932/ENSG00000198382/ENSG00000196730/ENSG00000109670/ENSG00000111276/ENSG00000204120/ENSG00000173548/ENSG00000176641/ENSG00000166233/ENSG00000206418…	27	ENSG00000165916/ENSG00000116288/ENSG00000013275/ENSG00000087191/ENSG00000104904/ENSG00000167136/ENSG00000105401/ENSG00000196683/ENSG00000137288/ENSG00000168002/ENSG00000125538/ENSG00000133265/ENSG00000100263/ENSG00000185825/ENSG00000130770/ENSG00000100219/ENSG00000173334/ENSG00000204348/ENSG00000080824/ENSG00000101997/ENSG00000120885/ENSG00000002330/ENSG00000130203/ENSG00000123843/ENSG00000116299…
BP	GO:0009150	purine ribonucleotide metabolic process	142/3465	468/14357	0.00108122	0.0437701	ENSG00000168209/ENSG00000108179/ENSG00000198888/ENSG00000090266/ENSG00000164405/ENSG00000198763/ENSG00000147684/ENSG00000087494/ENSG00000198931/ENSG00000113161/ENSG00000198804/ENSG00000172115/ENSG00000198668/ENSG00000143153/ENSG00000154723/ENSG00000120899/ENSG00000132341/ENSG00000116288/ENSG00000239672/ENSG00000125877/ENSG00000074800/ENSG00000171723/ENSG00000198727/ENSG00000124172/ENSG00000169567…	DDIT4/PPIF/MT-ND1/NDUFB2/UQCRQ/MT-ND2/NDUFB9/PTHLH/APRT/HMGCR/MT-CO1/CYCS/CALM1/ATP1B1/ATP5PF/PTK2B/RAN/PARK7/NME1/ITPA/ENO1/GPHN/MT-CYB/ATP5F1E/HINT1/NDUFB11/MBIP/IMPDH2/NDUFA4/TSPO/NDUFS6/MT-CO2/NDUFS5/PDE7A/TPI1/ATP5MC1/ATP5MF/COX4I1/COX6C/DCAKD/PPARGC1A/COX6A1/EIF6/NDUFA6/COX8A/NDUFB7/UQCC2/MT-CO3/COX5B/NDUFC2/UQCRH/ATP5PD/PGM2L1/NDUFA1/NME2/ATP5F1D/PKM/PGAM1/PODXL2/ARNT/NDUFA2/NDUFB10/RORA/N…	142	42	ENSG00000168209/ENSG00000113161/ENSG00000143153/ENSG00000120899/ENSG00000171723/ENSG00000151332/ENSG00000205268/ENSG00000172992/ENSG00000109819/ENSG00000165434/ENSG00000143437/ENSG00000069667/ENSG00000131473/ENSG00000120137/ENSG00000157881/ENSG00000119139/ENSG00000162104/ENSG00000186951/ENSG00000139496/ENSG00000006695/ENSG00000180340/ENSG00000213906/ENSG00000100644/ENSG00000101126/ENSG00000138271…	100	ENSG00000108179/ENSG00000198888/ENSG00000090266/ENSG00000164405/ENSG00000198763/ENSG00000147684/ENSG00000087494/ENSG00000198931/ENSG00000198804/ENSG00000172115/ENSG00000198668/ENSG00000154723/ENSG00000132341/ENSG00000116288/ENSG00000239672/ENSG00000125877/ENSG00000074800/ENSG00000198727/ENSG00000124172/ENSG00000169567/ENSG00000147123/ENSG00000178035/ENSG00000189043/ENSG00000100300/ENSG00000145494…
BP	GO:1902036	regulation of hematopoietic stem cell differentiation	38/3465	99/14357	0.00108816	0.0437701	ENSG00000165916/ENSG00000078900/ENSG00000143947/ENSG00000118058/ENSG00000163041/ENSG00000013275/ENSG00000078747/ENSG00000159377/ENSG00000087191/ENSG00000101182/ENSG00000100804/ENSG00000274267/ENSG00000142507/ENSG00000126067/ENSG00000221983/ENSG00000097007/ENSG00000150991/ENSG00000107485/ENSG00000099341/ENSG00000198728/ENSG00000277791/ENSG00000131467/ENSG00000278828/ENSG00000275714/ENSG00000276180…	PSMC3/TP73/RPS27A/KMT2A/H3F3A/PSMC4/ITCH/PSMB4/PSMC5/PSMA7/PSMB5/HIST1H3B/PSMB6/PSMB2/UBA52/ABL1/UBC/GATA3/PSMD8/LDB1/PSMB3/PSME3/HIST1H3H/HIST1H3A/HIST1H4I/HIST1H4H/HIST1H3C/HIST1H3E/HIST1H4E/HIST2H3D/HIST1H4D/HIST1H3J/HIST1H4J/MYB/HIST1H3G/HIST2H4B/HIST1H4C/HIST1H4K	38	8	ENSG00000078900/ENSG00000118058/ENSG00000078747/ENSG00000097007/ENSG00000150991/ENSG00000107485/ENSG00000198728/ENSG00000118513	30	ENSG00000165916/ENSG00000143947/ENSG00000163041/ENSG00000013275/ENSG00000159377/ENSG00000087191/ENSG00000101182/ENSG00000100804/ENSG00000274267/ENSG00000142507/ENSG00000126067/ENSG00000221983/ENSG00000099341/ENSG00000277791/ENSG00000131467/ENSG00000278828/ENSG00000275714/ENSG00000276180/ENSG00000158406/ENSG00000278272/ENSG00000274750/ENSG00000276966/ENSG00000183598/ENSG00000277157/ENSG00000197153…
BP	GO:0007566	embryo implantation	20/3465	43/14357	0.00111112	0.0443829	ENSG00000073756/ENSG00000130726/ENSG00000113739/ENSG00000100985/ENSG00000135503/ENSG00000186350/ENSG00000142168/ENSG00000102265/ENSG00000112033/ENSG00000125538/ENSG00000172270/ENSG00000162244/ENSG00000101439/ENSG00000163453/ENSG00000111348/ENSG00000149021/ENSG00000117713/ENSG00000163513/ENSG00000159167/ENSG00000156574	PTGS2/TRIM28/STC2/MMP9/ACVR1B/RXRA/SOD1/TIMP1/PPARD/IL1B/BSG/RPL29/CST3/IGFBP7/ARHGDIB/SCGB1A1/ARID1A/TGFBR2/STC1/NODAL	20	6	ENSG00000135503/ENSG00000186350/ENSG00000112033/ENSG00000117713/ENSG00000163513/ENSG00000156574	14	ENSG00000073756/ENSG00000130726/ENSG00000113739/ENSG00000100985/ENSG00000142168/ENSG00000102265/ENSG00000125538/ENSG00000172270/ENSG00000162244/ENSG00000101439/ENSG00000163453/ENSG00000111348/ENSG00000149021/ENSG00000159167
BP	GO:0098727	maintenance of cell number	50/3465	139/14357	0.00112192	0.0445055	ENSG00000124151/ENSG00000101384/ENSG00000162738/ENSG00000150907/ENSG00000148400/ENSG00000116128/ENSG00000134250/ENSG00000177700/ENSG00000147669/ENSG00000073282/ENSG00000168002/ENSG00000107779/ENSG00000143033/ENSG00000114315/ENSG00000102978/ENSG00000118689/ENSG00000006712/ENSG00000116016/ENSG00000186174/ENSG00000135111/ENSG00000168214/ENSG00000198728/ENSG00000100142/ENSG00000178764/ENSG00000087087…	NCOA3/JAG1/VANGL2/FOXO1/NOTCH1/BCL9/NOTCH2/POLR2L/POLR2K/TP63/POLR2G/BMPR1A/MTF2/HES1/POLR2C/FOXO3/PAF1/EPAS1/BCL9L/TBX3/RBPJ/LDB1/POLR2F/ZHX2/SRRT/PBX1/EPHA1/NIPBL/RTF1/TUT4/LBH/KDM3A/HOOK3/BRAF/ZNF322/ARID1A/SOX4/EIF4ENIF1/SOX2/SALL4/METTL14/HES5/PROX1/MMP24/SKI/DDX6/NODAL/PAX8/SALL1/HNF1B	50	39	ENSG00000124151/ENSG00000101384/ENSG00000162738/ENSG00000150907/ENSG00000148400/ENSG00000116128/ENSG00000134250/ENSG00000073282/ENSG00000107779/ENSG00000143033/ENSG00000114315/ENSG00000118689/ENSG00000116016/ENSG00000186174/ENSG00000168214/ENSG00000198728/ENSG00000178764/ENSG00000185630/ENSG00000146904/ENSG00000164190/ENSG00000137815/ENSG00000134744/ENSG00000213626/ENSG00000115548/ENSG00000168172…	11	ENSG00000177700/ENSG00000147669/ENSG00000168002/ENSG00000102978/ENSG00000006712/ENSG00000135111/ENSG00000100142/ENSG00000087087/ENSG00000125966/ENSG00000125618/ENSG00000275410
BP	GO:0035904	aorta development	21/3465	46/14357	0.0011361	0.0447591	ENSG00000101384/ENSG00000057657/ENSG00000138802/ENSG00000148400/ENSG00000107882/ENSG00000107779/ENSG00000070614/ENSG00000114315/ENSG00000168214/ENSG00000167034/ENSG00000137834/ENSG00000125266/ENSG00000284485/ENSG00000106991/ENSG00000124766/ENSG00000164683/ENSG00000171316/ENSG00000117707/ENSG00000092969/ENSG00000128917/ENSG00000135547	JAG1/PRDM1/SEC24B/NOTCH1/SUFU/BMPR1A/NDST1/HES1/RBPJ/NKX3-1/SMAD6/EFNB2/MIR205/ENG/SOX4/HEY1/CHD7/PROX1/TGFB2/DLL4/HEY2	21	17	ENSG00000101384/ENSG00000138802/ENSG00000148400/ENSG00000107882/ENSG00000107779/ENSG00000070614/ENSG00000114315/ENSG00000168214/ENSG00000137834/ENSG00000284485/ENSG00000106991/ENSG00000124766/ENSG00000164683/ENSG00000171316/ENSG00000117707/ENSG00000092969/ENSG00000135547	4	ENSG00000057657/ENSG00000167034/ENSG00000125266/ENSG00000128917
BP	GO:0021915	neural tube development	52/3465	146/14357	0.00116892	0.0457389	ENSG00000106571/ENSG00000147050/ENSG00000160007/ENSG00000172757/ENSG00000138802/ENSG00000162738/ENSG00000101109/ENSG00000148400/ENSG00000171863/ENSG00000107882/ENSG00000204138/ENSG00000138771/ENSG00000108518/ENSG00000166145/ENSG00000185920/ENSG00000165699/ENSG00000097007/ENSG00000101752/ENSG00000125850/ENSG00000114315/ENSG00000110497/ENSG00000164741/ENSG00000070018/ENSG00000142867/ENSG00000167642…	GLI3/KDM6A/ARHGAP35/CFL1/SEC24B/VANGL2/STK4/NOTCH1/RPS7/SUFU/PHACTR4/SHROOM3/PFN1/SPINT1/PTCH1/TSC1/ABL1/MIB1/OVOL2/HES1/AMBRA1/DLC1/LRP6/BCL10/SPINT2/GRHL2/SETD2/FKBP8/APAF1/SEMA4C/FZD2/TRAF6/HIF1A/SEMA3C/DACT1/ADM/ARID1A/ZFP36L1/SOX4/SALL4/TWIST1/GRHL3/HES5/PROX1/DCHS1/TGFB2/WNT5A/FOLR1/SKI/NODAL/INKA1/GLI2	52	44	ENSG00000106571/ENSG00000147050/ENSG00000160007/ENSG00000138802/ENSG00000162738/ENSG00000101109/ENSG00000148400/ENSG00000107882/ENSG00000204138/ENSG00000138771/ENSG00000166145/ENSG00000185920/ENSG00000165699/ENSG00000097007/ENSG00000101752/ENSG00000125850/ENSG00000114315/ENSG00000110497/ENSG00000164741/ENSG00000070018/ENSG00000142867/ENSG00000083307/ENSG00000181555/ENSG00000120868/ENSG00000168758…	8	ENSG00000172757/ENSG00000171863/ENSG00000108518/ENSG00000167642/ENSG00000105701/ENSG00000166341/ENSG00000110195/ENSG00000185614
BP	GO:0048562	embryonic organ morphogenesis	79/3465	240/14357	0.00119542	0.0457512	ENSG00000186480/ENSG00000124813/ENSG00000204103/ENSG00000166949/ENSG00000133816/ENSG00000106571/ENSG00000147050/ENSG00000143816/ENSG00000138802/ENSG00000162738/ENSG00000078401/ENSG00000119508/ENSG00000148400/ENSG00000107882/ENSG00000125629/ENSG00000142168/ENSG00000204138/ENSG00000137203/ENSG00000115170/ENSG00000105991/ENSG00000169242/ENSG00000101752/ENSG00000070614/ENSG00000125850/ENSG00000114315…	INSIG1/RUNX2/MAFB/SMAD3/MICAL2/GLI3/KDM6A/WNT9A/SEC24B/VANGL2/EDN1/NR4A3/NOTCH1/SUFU/INSIG2/SOD1/PHACTR4/TFAP2A/ACVR1/HOXA1/EFNA1/MIB1/NDST1/OVOL2/HES1/SIX4/RPL38/GATA3/LRP6/TBX3/EPHB2/GRHL2/HIPK1/SETD2/NIPBL/FZD2/WDR60/SP3/DLX2/HOXA3/HIF1A/HIPK2/ENG/AXIN1/LRIG3/SATB2/FRS2/USH1G/ARID1A/SLC39A3/TGFBR2/HOXA5/CHRNA10/CHD7/SLC39A1/STRC/TWIST1/LHX1/GRHL3/TSHZ1/DLX6/PROX1/OTX1/FBN1/HOXA11/HOXC11/WNT5A/…	79	64	ENSG00000186480/ENSG00000124813/ENSG00000166949/ENSG00000133816/ENSG00000106571/ENSG00000147050/ENSG00000143816/ENSG00000138802/ENSG00000162738/ENSG00000148400/ENSG00000107882/ENSG00000125629/ENSG00000204138/ENSG00000137203/ENSG00000115170/ENSG00000105991/ENSG00000169242/ENSG00000101752/ENSG00000070614/ENSG00000125850/ENSG00000114315/ENSG00000100625/ENSG00000107485/ENSG00000070018/ENSG00000133216…	15	ENSG00000204103/ENSG00000078401/ENSG00000119508/ENSG00000142168/ENSG00000172809/ENSG00000135111/ENSG00000115844/ENSG00000141873/ENSG00000129749/ENSG00000143570/ENSG00000005073/ENSG00000110195/ENSG00000125618/ENSG00000275410/ENSG00000163132
BP	GO:0070304	positive regulation of stress-activated protein kinase signaling cascade	49/3465	136/14357	0.00120105	0.0457512	ENSG00000118523/ENSG00000135960/ENSG00000107984/ENSG00000113161/ENSG00000177283/ENSG00000136848/ENSG00000006432/ENSG00000120899/ENSG00000162738/ENSG00000078401/ENSG00000254087/ENSG00000198909/ENSG00000197442/ENSG00000141503/ENSG00000146192/ENSG00000149273/ENSG00000156299/ENSG00000188064/ENSG00000163362/ENSG00000154310/ENSG00000125538/ENSG00000143674/ENSG00000196396/ENSG00000076984/ENSG00000106100…	CTGF/EDAR/DKK1/HMGCR/FZD8/DAB2IP/MAP3K9/PTK2B/VANGL2/EDN1/LYN/MAP3K3/MAP3K5/MINK1/FGD2/RPS3/TIAM1/WNT7B/INAVA/TNIK/IL1B/MAP3K21/PTPN1/MAP2K7/NOD1/MID1/MAP3K2/TAOK1/TAOK3/RB1CC1/SEMA4C/GADD45A/TRAF6/SEMA3A/HIPK2/AXIN1/CARD9/SASH1/FZD10/MAP2K4/TLR6/UNC5CL/TGFB2/WNT5A/GADD45B/NOD2/FGF19/GDF6/RASGRP1	49	39	ENSG00000135960/ENSG00000113161/ENSG00000136848/ENSG00000006432/ENSG00000120899/ENSG00000162738/ENSG00000254087/ENSG00000198909/ENSG00000197442/ENSG00000141503/ENSG00000156299/ENSG00000188064/ENSG00000163362/ENSG00000154310/ENSG00000143674/ENSG00000196396/ENSG00000076984/ENSG00000106100/ENSG00000101871/ENSG00000169967/ENSG00000160551/ENSG00000135090/ENSG00000023287/ENSG00000168758/ENSG00000175104…	10	ENSG00000118523/ENSG00000107984/ENSG00000177283/ENSG00000078401/ENSG00000146192/ENSG00000149273/ENSG00000125538/ENSG00000116717/ENSG00000187796/ENSG00000099860
BP	GO:0071772	response to BMP	49/3465	136/14357	0.00120105	0.0457512	ENSG00000198742/ENSG00000124813/ENSG00000107984/ENSG00000070404/ENSG00000148400/ENSG00000175931/ENSG00000104899/ENSG00000115170/ENSG00000141622/ENSG00000120738/ENSG00000166145/ENSG00000113658/ENSG00000107779/ENSG00000097007/ENSG00000114315/ENSG00000107485/ENSG00000251493/ENSG00000168214/ENSG00000167642/ENSG00000182175/ENSG00000137834/ENSG00000105701/ENSG00000278129/ENSG00000125968/ENSG00000100614…	SMURF1/RUNX2/DKK1/FSTL3/NOTCH1/UBE2O/AMH/ACVR1/RNF165/EGR1/SPINT1/SMAD5/BMPR1A/ABL1/HES1/GATA3/FOXD1/RBPJ/SPINT2/RGMA/SMAD6/FKBP8/ZNF8/ID1/PPM1A/ACVR2B/TRIM33/SMAD7/BMPR2/HIPK2/ENG/XIAP/SLC33A1/BMPR1B/LEMD3/ACVR2A/HES5/TGFBR3/FBN1/INHA/TGFB2/WNT5A/SKI/NODAL/GDF6/SOST/MSX1/GDF9/SFRP5	49	40	ENSG00000198742/ENSG00000124813/ENSG00000148400/ENSG00000175931/ENSG00000115170/ENSG00000141622/ENSG00000120738/ENSG00000166145/ENSG00000113658/ENSG00000107779/ENSG00000097007/ENSG00000114315/ENSG00000107485/ENSG00000168214/ENSG00000182175/ENSG00000137834/ENSG00000278129/ENSG00000125968/ENSG00000100614/ENSG00000114739/ENSG00000197323/ENSG00000101665/ENSG00000204217/ENSG00000064393/ENSG00000106991…	9	ENSG00000107984/ENSG00000070404/ENSG00000104899/ENSG00000251493/ENSG00000167642/ENSG00000105701/ENSG00000167941/ENSG00000163132/ENSG00000120057
BP	GO:0071773	cellular response to BMP stimulus	49/3465	136/14357	0.00120105	0.0457512	ENSG00000198742/ENSG00000124813/ENSG00000107984/ENSG00000070404/ENSG00000148400/ENSG00000175931/ENSG00000104899/ENSG00000115170/ENSG00000141622/ENSG00000120738/ENSG00000166145/ENSG00000113658/ENSG00000107779/ENSG00000097007/ENSG00000114315/ENSG00000107485/ENSG00000251493/ENSG00000168214/ENSG00000167642/ENSG00000182175/ENSG00000137834/ENSG00000105701/ENSG00000278129/ENSG00000125968/ENSG00000100614…	SMURF1/RUNX2/DKK1/FSTL3/NOTCH1/UBE2O/AMH/ACVR1/RNF165/EGR1/SPINT1/SMAD5/BMPR1A/ABL1/HES1/GATA3/FOXD1/RBPJ/SPINT2/RGMA/SMAD6/FKBP8/ZNF8/ID1/PPM1A/ACVR2B/TRIM33/SMAD7/BMPR2/HIPK2/ENG/XIAP/SLC33A1/BMPR1B/LEMD3/ACVR2A/HES5/TGFBR3/FBN1/INHA/TGFB2/WNT5A/SKI/NODAL/GDF6/SOST/MSX1/GDF9/SFRP5	49	40	ENSG00000198742/ENSG00000124813/ENSG00000148400/ENSG00000175931/ENSG00000115170/ENSG00000141622/ENSG00000120738/ENSG00000166145/ENSG00000113658/ENSG00000107779/ENSG00000097007/ENSG00000114315/ENSG00000107485/ENSG00000168214/ENSG00000182175/ENSG00000137834/ENSG00000278129/ENSG00000125968/ENSG00000100614/ENSG00000114739/ENSG00000197323/ENSG00000101665/ENSG00000204217/ENSG00000064393/ENSG00000106991…	9	ENSG00000107984/ENSG00000070404/ENSG00000104899/ENSG00000251493/ENSG00000167642/ENSG00000105701/ENSG00000167941/ENSG00000163132/ENSG00000120057
BP	GO:0032868	response to insulin	75/3465	226/14357	0.00121832	0.0459039	ENSG00000128564/ENSG00000185591/ENSG00000198931/ENSG00000140443/ENSG00000121858/ENSG00000084207/ENSG00000150907/ENSG00000254087/ENSG00000001084/ENSG00000149639/ENSG00000117394/ENSG00000125629/ENSG00000163932/ENSG00000011454/ENSG00000135446/ENSG00000124160/ENSG00000187210/ENSG00000242372/ENSG00000072310/ENSG00000158092/ENSG00000120738/ENSG00000048052/ENSG00000116350/ENSG00000184557/ENSG00000137145…	VGF/SP1/APRT/IGF1R/TNFSF10/GSTP1/FOXO1/LYN/GCLC/SOGA1/SLC2A1/INSIG2/PRKCD/RABGAP1/CDK4/NCOA5/GCNT1/EIF6/SREBF1/NCK1/EGR1/HDAC9/SRSF4/SOCS3/DENND4C/TSC1/RAB8B/SH2B2/PKM/IL1B/PTPN1/GGH/USF1/CRY1/SESN3/SIK2/CPEB2/EEF2K/ATP6V0B/XBP1/SOCS1/ATP6V1F/PIK3C2A/NDEL1/GAB1/PPARA/CISH/PTEN/SOCS7/PIK3R1/PCK2/LPIN1/SLC2A4/OSBPL8/NGFR/SRC/SLC27A1/PIK3CA/PHIP/PIK3R3/ATP6V1A/ADM/ZFP36L1/INSR/ATP6V0C/ATP6V0D2/CEACA…	75	57	ENSG00000185591/ENSG00000140443/ENSG00000121858/ENSG00000150907/ENSG00000254087/ENSG00000001084/ENSG00000149639/ENSG00000117394/ENSG00000125629/ENSG00000163932/ENSG00000011454/ENSG00000187210/ENSG00000072310/ENSG00000158092/ENSG00000120738/ENSG00000048052/ENSG00000116350/ENSG00000184557/ENSG00000137145/ENSG00000165699/ENSG00000166128/ENSG00000160999/ENSG00000196396/ENSG00000158773/ENSG00000008405…	18	ENSG00000128564/ENSG00000198931/ENSG00000084207/ENSG00000135446/ENSG00000124160/ENSG00000242372/ENSG00000067225/ENSG00000125538/ENSG00000137563/ENSG00000117410/ENSG00000100219/ENSG00000185338/ENSG00000128524/ENSG00000100889/ENSG00000185883/ENSG00000079385/ENSG00000171612/ENSG00000175564
BP	GO:0008584	male gonad development	43/3465	116/14357	0.00122102	0.0459039	ENSG00000129194/ENSG00000123131/ENSG00000112972/ENSG00000164442/ENSG00000121858/ENSG00000070404/ENSG00000136943/ENSG00000137075/ENSG00000054267/ENSG00000110395/ENSG00000124733/ENSG00000167487/ENSG00000144747/ENSG00000106268/ENSG00000032219/ENSG00000114742/ENSG00000100290/ENSG00000102531/ENSG00000100625/ENSG00000012061/ENSG00000107485/ENSG00000101439/ENSG00000150347/ENSG00000167034/ENSG00000078399…	SOX15/PRDX4/HMGCS1/CITED2/TNFSF10/FSTL3/CTSV/RNF38/ARID4B/CBL/MEA1/KLHL26/TMF1/NUDT1/ARID4A/WDR48/BIK/FNDC3A/SIX4/ERCC1/GATA3/CST3/ARID5B/NKX3-1/HOXA9/HMGB2/TBC1D20/SEMA3A/KIF18A/TEX19/WNT2B/INHBA/TFAP2C/INSR/ACVR2A/MAMLD1/NUP210L/HOXA11/INHA/ING2/TGFB2/WNT5A/FGF9	43	29	ENSG00000112972/ENSG00000121858/ENSG00000137075/ENSG00000054267/ENSG00000110395/ENSG00000167487/ENSG00000144747/ENSG00000032219/ENSG00000114742/ENSG00000102531/ENSG00000100625/ENSG00000107485/ENSG00000150347/ENSG00000078399/ENSG00000164104/ENSG00000125875/ENSG00000075213/ENSG00000121621/ENSG00000182459/ENSG00000134245/ENSG00000087510/ENSG00000171105/ENSG00000121989/ENSG00000013619/ENSG00000123999…	14	ENSG00000129194/ENSG00000123131/ENSG00000164442/ENSG00000070404/ENSG00000136943/ENSG00000124733/ENSG00000106268/ENSG00000100290/ENSG00000012061/ENSG00000101439/ENSG00000167034/ENSG00000122641/ENSG00000143552/ENSG00000005073
BP	GO:0043405	regulation of MAP kinase activity	97/3465	305/14357	0.00128911	0.048149	ENSG00000107984/ENSG00000108465/ENSG00000170776/ENSG00000113161/ENSG00000177283/ENSG00000078900/ENSG00000136848/ENSG00000140443/ENSG00000084207/ENSG00000111266/ENSG00000006432/ENSG00000120899/ENSG00000162738/ENSG00000143947/ENSG00000078401/ENSG00000254087/ENSG00000110514/ENSG00000101109/ENSG00000132522/ENSG00000107968/ENSG00000198909/ENSG00000197442/ENSG00000139318/ENSG00000142168/ENSG00000141503…	DKK1/CDK5RAP3/AKAP13/HMGCR/FZD8/TP73/DAB2IP/IGF1R/GSTP1/DUSP16/MAP3K9/PTK2B/VANGL2/RPS27A/EDN1/LYN/MADD/STK4/GPS2/MAP3K8/MAP3K3/MAP3K5/DUSP6/SOD1/MINK1/PRKCD/MBIP/FGD2/RPS3/RGS3/MAP3K1/TIAM1/WNT7B/MAP3K14/RGS2/INAVA/LPAR3/DUSP4/UBA52/SPRED2/DUSP10/TNIK/IL1B/MAP3K21/UBC/PTPN1/MAP2K7/NOD1/IRAK1/MAP3K2/CSPG4/EPHB2/IRAK2/MAPKAPK2/TAB2/MAP4K3/TAOK1/PIK3CB/TRIB1/KRAS/AJUBA/TAOK3/TAB3/SMPD1/CRKL/GADD45A…	97	72	ENSG00000108465/ENSG00000170776/ENSG00000113161/ENSG00000078900/ENSG00000136848/ENSG00000140443/ENSG00000111266/ENSG00000006432/ENSG00000120899/ENSG00000162738/ENSG00000254087/ENSG00000110514/ENSG00000101109/ENSG00000107968/ENSG00000198909/ENSG00000197442/ENSG00000141503/ENSG00000163932/ENSG00000151332/ENSG00000138835/ENSG00000095015/ENSG00000156299/ENSG00000188064/ENSG00000006062/ENSG00000163362…	25	ENSG00000107984/ENSG00000177283/ENSG00000084207/ENSG00000143947/ENSG00000078401/ENSG00000132522/ENSG00000139318/ENSG00000142168/ENSG00000146192/ENSG00000149273/ENSG00000116741/ENSG00000120875/ENSG00000221983/ENSG00000125538/ENSG00000184216/ENSG00000173334/ENSG00000129474/ENSG00000166311/ENSG00000116717/ENSG00000130203/ENSG00000184545/ENSG00000163221/ENSG00000185527/ENSG00000099860/ENSG00000176945
BP	GO:0014009	glial cell proliferation	16/3465	32/14357	0.00132815	0.0489711	ENSG00000153902/ENSG00000120899/ENSG00000254087/ENSG00000148400/ENSG00000100300/ENSG00000027075/ENSG00000114315/ENSG00000181690/ENSG00000120885/ENSG00000109321/ENSG00000014123/ENSG00000124766/ENSG00000226979/ENSG00000157933/ENSG00000118513/ENSG00000207870	LGI4/PTK2B/LYN/NOTCH1/TSPO/PRKCH/HES1/PLAG1/CLU/AREG/UFL1/SOX4/LTA/SKI/MYB/MIR221	16	11	ENSG00000120899/ENSG00000254087/ENSG00000148400/ENSG00000027075/ENSG00000114315/ENSG00000181690/ENSG00000014123/ENSG00000124766/ENSG00000157933/ENSG00000118513/ENSG00000207870	5	ENSG00000153902/ENSG00000100300/ENSG00000120885/ENSG00000109321/ENSG00000226979
BP	GO:0032924	activin receptor signaling pathway	16/3465	32/14357	0.00132815	0.0489711	ENSG00000134363/ENSG00000166949/ENSG00000164442/ENSG00000070404/ENSG00000135503/ENSG00000115170/ENSG00000114739/ENSG00000101665/ENSG00000204217/ENSG00000122641/ENSG00000174106/ENSG00000121989/ENSG00000157933/ENSG00000156574/ENSG00000156466/ENSG00000102678	FST/SMAD3/CITED2/FSTL3/ACVR1B/ACVR1/ACVR2B/SMAD7/BMPR2/INHBA/LEMD3/ACVR2A/SKI/NODAL/GDF6/FGF9	16	12	ENSG00000166949/ENSG00000135503/ENSG00000115170/ENSG00000114739/ENSG00000101665/ENSG00000204217/ENSG00000174106/ENSG00000121989/ENSG00000157933/ENSG00000156574/ENSG00000156466/ENSG00000102678	4	ENSG00000134363/ENSG00000164442/ENSG00000070404/ENSG00000122641
BP	GO:0000082	G1/S transition of mitotic cell cycle	79/3465	241/14357	0.00136496	0.0499912	ENSG00000140465/ENSG00000115350/ENSG00000175793/ENSG00000146834/ENSG00000078900/ENSG00000100297/ENSG00000166483/ENSG00000148660/ENSG00000159388/ENSG00000143947/ENSG00000138767/ENSG00000099901/ENSG00000135503/ENSG00000150457/ENSG00000137154/ENSG00000172273/ENSG00000076003/ENSG00000111276/ENSG00000135446/ENSG00000175215/ENSG00000137210/ENSG00000140464/ENSG00000151893/ENSG00000115170/ENSG00000204120…	CYP1A1/POLE4/SFN/MEPCE/TP73/MCM5/WEE1/CAMK2G/BTG2/RPS27A/CNOT6L/RANBP1/ACVR1B/LATS2/RPS6/HINFP/MCM6/CDKN1B/CDK4/CTDSP2/TMEM14B/PML/CACUL1/ACVR1/GIGYF2/MCM7/TP63/POLE3/UBA52/CAMK2A/CDK7/PIAS1/CDC45/KANK2/ZPR1/UBC/KMT2E/ARID3A/CCNA1/RPA3/CNOT8/BACH1/FBXO31/BRD4/ADAM17/TNKS1BP1/RPL26/LSM11/PSME3/PHF8/DBF4/RBL2/AURKA/PTEN/E2F1/DHFR/GTSE1/CASP2/GADD45A/CNOT4/RPS27L/CDKN2A/DACT1/INHBA/EP300/DCUN1D3/SOX…	79	49	ENSG00000140465/ENSG00000078900/ENSG00000166483/ENSG00000148660/ENSG00000159388/ENSG00000138767/ENSG00000135503/ENSG00000150457/ENSG00000172273/ENSG00000111276/ENSG00000175215/ENSG00000140464/ENSG00000151893/ENSG00000115170/ENSG00000204120/ENSG00000073282/ENSG00000070808/ENSG00000134058/ENSG00000033800/ENSG00000197256/ENSG00000150991/ENSG00000005483/ENSG00000116017/ENSG00000155508/ENSG00000156273…	30	ENSG00000115350/ENSG00000175793/ENSG00000146834/ENSG00000100297/ENSG00000143947/ENSG00000099901/ENSG00000137154/ENSG00000076003/ENSG00000135446/ENSG00000137210/ENSG00000166508/ENSG00000148229/ENSG00000221983/ENSG00000093009/ENSG00000109917/ENSG00000133101/ENSG00000106399/ENSG00000161970/ENSG00000131467/ENSG00000101412/ENSG00000228716/ENSG00000116717/ENSG00000185088/ENSG00000147889/ENSG00000122641…
BP	GO:0010469	regulation of signaling receptor activity	121/3465	393/14357	0.00137319	0.0499912	ENSG00000136244/ENSG00000163739/ENSG00000163734/ENSG00000115009/ENSG00000118523/ENSG00000124151/ENSG00000114796/ENSG00000128564/ENSG00000107984/ENSG00000113070/ENSG00000184502/ENSG00000101384/ENSG00000087494/ENSG00000081041/ENSG00000136688/ENSG00000169429/ENSG00000121858/ENSG00000143816/ENSG00000113739/ENSG00000120899/ENSG00000183723/ENSG00000078401/ENSG00000116288/ENSG00000110395/ENSG00000141503…	IL6/CXCL1/CXCL3/CCL20/CTGF/NCOA3/KLHL24/VGF/DKK1/HBEGF/GAST/JAG1/PTHLH/CXCL2/IL36G/CXCL8/TNFSF10/WNT9A/STC2/PTK2B/CMTM4/EDN1/PARK7/CBL/MINK1/NRG2/PRKCD/NMB/AMH/DAPK1/PHLDA2/FBXW7/CSF2/WNT7B/ARC/ARTN/PPARGC1A/SRA1/CLCF1/CCL22/CD320/TIMP1/TAF1/IL24/CNIH2/IL1B/NLGN2/ZP3/NENF/IL23A/OSGIN1/EPHB2/ADAM17/CHMP6/NAMPT/IL36RN/CDK5/TNFRSF11B/PTEN/MACC1/IL17C/FGF11/CBLB/CSF3/GPRC5A/AREG/LTB/P2RY1/IL1F10/ADM/…	121	55	ENSG00000124151/ENSG00000114796/ENSG00000101384/ENSG00000121858/ENSG00000143816/ENSG00000120899/ENSG00000183723/ENSG00000110395/ENSG00000141503/ENSG00000158458/ENSG00000163932/ENSG00000196730/ENSG00000109670/ENSG00000188064/ENSG00000117407/ENSG00000109819/ENSG00000102962/ENSG00000147133/ENSG00000169992/ENSG00000133216/ENSG00000151694/ENSG00000105835/ENSG00000171862/ENSG00000183742/ENSG00000161958…	66	ENSG00000136244/ENSG00000163739/ENSG00000163734/ENSG00000115009/ENSG00000118523/ENSG00000128564/ENSG00000107984/ENSG00000113070/ENSG00000184502/ENSG00000087494/ENSG00000081041/ENSG00000136688/ENSG00000169429/ENSG00000113739/ENSG00000078401/ENSG00000116288/ENSG00000197696/ENSG00000104899/ENSG00000181649/ENSG00000164400/ENSG00000198576/ENSG00000213523/ENSG00000175505/ENSG00000167775/ENSG00000102265…
CC	GO:0022626	cytosolic ribosome	79/3635	114/15126	1.57925e-24	1.11021e-21	ENSG00000089009/ENSG00000122026/ENSG00000156482/ENSG00000105372/ENSG00000186468/ENSG00000143947/ENSG00000008988/ENSG00000136942/ENSG00000147604/ENSG00000137818/ENSG00000114391/ENSG00000137154/ENSG00000182899/ENSG00000171863/ENSG00000115268/ENSG00000168028/ENSG00000125691/ENSG00000130255/ENSG00000163682/ENSG00000149273/ENSG00000110700/ENSG00000142541/ENSG00000053372/ENSG00000131469/ENSG00000037241…	RPL6/RPL21/RPL30/RPS19/RPS23/RPS27A/RPS20/RPL35/RPL7/RPLP1/RPL24/RPS6/RPL35A/RPS7/RPS15/RPSA/RPL23/RPL36/RPL9/RPS3/RPS13/RPL13A/MRTO4/RPL27/RPL26L1/RPL5/RPLP2/RPS12/RPL13/RPS9/RPL19/PPARGC1A/RPLP0/RPS16/RPS4X/RPL27A/RPL10/RPL15/RPL34/NHP2/RPS11/RPL32/RPL11/RPL18/RPS26/UBA52/RPS3A/RPL8/RPS8/RPL41/RPL7A/RPL4/RPS2/RPL18A/RPL10A/RPL37A/RPL39/RPL7L1/RPS18/RPL29/RPS5/RPL38/RPL37/RPL3/RPS25/RPS14/MCTS1/…	79	2	ENSG00000109819/ENSG00000163584	77	ENSG00000089009/ENSG00000122026/ENSG00000156482/ENSG00000105372/ENSG00000186468/ENSG00000143947/ENSG00000008988/ENSG00000136942/ENSG00000147604/ENSG00000137818/ENSG00000114391/ENSG00000137154/ENSG00000182899/ENSG00000171863/ENSG00000115268/ENSG00000168028/ENSG00000125691/ENSG00000130255/ENSG00000163682/ENSG00000149273/ENSG00000110700/ENSG00000142541/ENSG00000053372/ENSG00000131469/ENSG00000037241…
CC	GO:0044391	ribosomal subunit	99/3635	186/15126	6.4254e-18	2.25853e-15	ENSG00000062582/ENSG00000111639/ENSG00000089009/ENSG00000122026/ENSG00000156482/ENSG00000105372/ENSG00000186468/ENSG00000125445/ENSG00000182180/ENSG00000143947/ENSG00000008988/ENSG00000136942/ENSG00000147604/ENSG00000137818/ENSG00000114391/ENSG00000143314/ENSG00000137154/ENSG00000182899/ENSG00000171863/ENSG00000115268/ENSG00000168028/ENSG00000125691/ENSG00000172590/ENSG00000130255/ENSG00000163682…	MRPS24/MRPL51/RPL6/RPL21/RPL30/RPS19/RPS23/MRPS7/MRPS16/RPS27A/RPS20/RPL35/RPL7/RPLP1/RPL24/MRPL24/RPS6/RPL35A/RPS7/RPS15/RPSA/RPL23/MRPL52/RPL36/RPL9/RPS3/RPS13/MRPS12/RPL13A/MRTO4/RPL27/RPL26L1/RPL5/RPLP2/RPS12/RPL13/RPS9/RPL19/RPLP0/RPS16/RPS4X/RPL27A/RPL10/RPL15/RPL34/NHP2/MRPL40/RPS11/RPL32/RPL11/RPL18/RPS26/UBA52/RPS3A/RPL8/RPS8/MRPS33/MRPL11/RPL41/RPL7A/RPL4/RPS2/RBM3/MRPL37/RPL18A/RPL10A/…	99	1	ENSG00000163584	98	ENSG00000062582/ENSG00000111639/ENSG00000089009/ENSG00000122026/ENSG00000156482/ENSG00000105372/ENSG00000186468/ENSG00000125445/ENSG00000182180/ENSG00000143947/ENSG00000008988/ENSG00000136942/ENSG00000147604/ENSG00000137818/ENSG00000114391/ENSG00000143314/ENSG00000137154/ENSG00000182899/ENSG00000171863/ENSG00000115268/ENSG00000168028/ENSG00000125691/ENSG00000172590/ENSG00000130255/ENSG00000163682…
CC	GO:0022625	cytosolic large ribosomal subunit	46/3635	64/15126	8.06556e-16	1.89003e-13	ENSG00000089009/ENSG00000122026/ENSG00000156482/ENSG00000136942/ENSG00000147604/ENSG00000137818/ENSG00000114391/ENSG00000182899/ENSG00000125691/ENSG00000130255/ENSG00000163682/ENSG00000142541/ENSG00000053372/ENSG00000131469/ENSG00000037241/ENSG00000122406/ENSG00000177600/ENSG00000167526/ENSG00000108298/ENSG00000089157/ENSG00000166441/ENSG00000147403/ENSG00000174748/ENSG00000109475/ENSG00000145912…	RPL6/RPL21/RPL30/RPL35/RPL7/RPLP1/RPL24/RPL35A/RPL23/RPL36/RPL9/RPL13A/MRTO4/RPL27/RPL26L1/RPL5/RPLP2/RPL13/RPL19/RPLP0/RPL27A/RPL10/RPL15/RPL34/NHP2/RPL32/RPL11/RPL18/UBA52/RPL8/RPL41/RPL7A/RPL4/RPL18A/RPL10A/RPL37A/RPL39/RPL7L1/RPL29/RPL38/RPL37/RPL3/RPL26/RPL22L1/RPL28/RPL22	46	1	ENSG00000163584	45	ENSG00000089009/ENSG00000122026/ENSG00000156482/ENSG00000136942/ENSG00000147604/ENSG00000137818/ENSG00000114391/ENSG00000182899/ENSG00000125691/ENSG00000130255/ENSG00000163682/ENSG00000142541/ENSG00000053372/ENSG00000131469/ENSG00000037241/ENSG00000122406/ENSG00000177600/ENSG00000167526/ENSG00000108298/ENSG00000089157/ENSG00000166441/ENSG00000147403/ENSG00000174748/ENSG00000109475/ENSG00000145912…
CC	GO:0044445	cytosolic part	108/3635	230/15126	1.99833e-14	3.51207e-12	ENSG00000089009/ENSG00000122026/ENSG00000156482/ENSG00000165916/ENSG00000105372/ENSG00000186468/ENSG00000143947/ENSG00000008988/ENSG00000136942/ENSG00000147604/ENSG00000137818/ENSG00000114391/ENSG00000155252/ENSG00000137154/ENSG00000013275/ENSG00000182899/ENSG00000074800/ENSG00000171863/ENSG00000115268/ENSG00000168028/ENSG00000125691/ENSG00000087191/ENSG00000130255/ENSG00000163682/ENSG00000149273…	RPL6/RPL21/RPL30/PSMC3/RPS19/RPS23/RPS27A/RPS20/RPL35/RPL7/RPLP1/RPL24/PI4K2A/RPS6/PSMC4/RPL35A/ENO1/RPS7/RPS15/RPSA/RPL23/PSMC5/RPL36/RPL9/RPS3/RPS13/RPL13A/MRTO4/RPL27/RPL26L1/RPL5/RPLP2/RPS12/RPL13/RPS9/RPL19/PPARGC1A/RPLP0/CCT2/RPS16/RPS4X/RPL27A/RPL10/RPL15/RPL34/NHP2/RPS11/RPL32/RPL11/RPL18/RPS26/UBA52/RPS3A/RPL8/RPS8/TSC1/RPL41/RPL7A/CCT7/RPL4/RPS2/RPL18A/RPL10A/RPL37A/HPS3/RPL39/CCT6A/RPL…	108	12	ENSG00000155252/ENSG00000109819/ENSG00000165699/ENSG00000163755/ENSG00000082805/ENSG00000163584/ENSG00000162104/ENSG00000188428/ENSG00000120868/ENSG00000117758/ENSG00000196544/ENSG00000129467	96	ENSG00000089009/ENSG00000122026/ENSG00000156482/ENSG00000165916/ENSG00000105372/ENSG00000186468/ENSG00000143947/ENSG00000008988/ENSG00000136942/ENSG00000147604/ENSG00000137818/ENSG00000114391/ENSG00000137154/ENSG00000013275/ENSG00000182899/ENSG00000074800/ENSG00000171863/ENSG00000115268/ENSG00000168028/ENSG00000125691/ENSG00000087191/ENSG00000130255/ENSG00000163682/ENSG00000149273/ENSG00000110700…
CC	GO:0005840	ribosome	107/3635	232/15126	1.1594e-13	1.63012e-11	ENSG00000062582/ENSG00000111639/ENSG00000089009/ENSG00000122026/ENSG00000156482/ENSG00000173141/ENSG00000105372/ENSG00000186468/ENSG00000125445/ENSG00000182180/ENSG00000143947/ENSG00000008988/ENSG00000136942/ENSG00000147604/ENSG00000137818/ENSG00000114391/ENSG00000143314/ENSG00000137154/ENSG00000182899/ENSG00000171863/ENSG00000115268/ENSG00000168028/ENSG00000125691/ENSG00000172590/ENSG00000130255…	MRPS24/MRPL51/RPL6/RPL21/RPL30/MRPL57/RPS19/RPS23/MRPS7/MRPS16/RPS27A/RPS20/RPL35/RPL7/RPLP1/RPL24/MRPL24/RPS6/RPL35A/RPS7/RPS15/RPSA/RPL23/MRPL52/RPL36/RPL9/RPS3/RPS13/MRPS12/RPL13A/MRTO4/AURKAIP1/RPL27/RPL26L1/RPL5/RPLP2/RPS12/RPL13/RPS9/RPL19/GADD45GIP1/PPARGC1A/RPLP0/RPS16/RPS4X/RPL27A/RPL10/RPL15/RPL34/NHP2/MRPL40/NCK1/RPS11/RPL32/FMR1/RPL11/RPL18/RPS26/UBA52/RPS3A/RPL8/RPS8/MRPS33/MRPL11/RP…	107	5	ENSG00000109819/ENSG00000158092/ENSG00000102081/ENSG00000108256/ENSG00000163584	102	ENSG00000062582/ENSG00000111639/ENSG00000089009/ENSG00000122026/ENSG00000156482/ENSG00000173141/ENSG00000105372/ENSG00000186468/ENSG00000125445/ENSG00000182180/ENSG00000143947/ENSG00000008988/ENSG00000136942/ENSG00000147604/ENSG00000137818/ENSG00000114391/ENSG00000143314/ENSG00000137154/ENSG00000182899/ENSG00000171863/ENSG00000115268/ENSG00000168028/ENSG00000125691/ENSG00000172590/ENSG00000130255…
CC	GO:0070469	respiratory chain	54/3635	95/15126	6.81944e-12	7.99011e-10	ENSG00000198888/ENSG00000090266/ENSG00000164405/ENSG00000198763/ENSG00000147684/ENSG00000198804/ENSG00000172115/ENSG00000116288/ENSG00000112695/ENSG00000198727/ENSG00000147123/ENSG00000189043/ENSG00000145494/ENSG00000198712/ENSG00000168653/ENSG00000131143/ENSG00000111775/ENSG00000184983/ENSG00000176340/ENSG00000099795/ENSG00000198938/ENSG00000135940/ENSG00000151366/ENSG00000173660/ENSG00000125356…	MT-ND1/NDUFB2/UQCRQ/MT-ND2/NDUFB9/MT-CO1/CYCS/PARK7/COX7A2/MT-CYB/NDUFB11/NDUFA4/NDUFS6/MT-CO2/NDUFS5/COX4I1/COX6A1/NDUFA6/COX8A/NDUFB7/MT-CO3/COX5B/NDUFC2/UQCRH/NDUFA1/NDUFA2/NDUFB10/NDUFB1/NDUFA8/NDUFC1/NDUFA11/NDUFAB1/CYC1/COX7C/HIGD2A/BCS1L/SURF1/MT-ND3/NDUFS4/NDUFB5/UQCR11/NDUFA3/NDUFB4/NDUFB6/UQCR10/NDUFAF1/NDUFB3/UQCC3/NDUFA4L2/NDUFB8/HIGD1A/UQCRHL/NDUFV2/C15orf48	54	1	ENSG00000178127	53	ENSG00000198888/ENSG00000090266/ENSG00000164405/ENSG00000198763/ENSG00000147684/ENSG00000198804/ENSG00000172115/ENSG00000116288/ENSG00000112695/ENSG00000198727/ENSG00000147123/ENSG00000189043/ENSG00000145494/ENSG00000198712/ENSG00000168653/ENSG00000131143/ENSG00000111775/ENSG00000184983/ENSG00000176340/ENSG00000099795/ENSG00000198938/ENSG00000135940/ENSG00000151366/ENSG00000173660/ENSG00000125356…
CC	GO:0098800	inner mitochondrial membrane protein complex	70/3635	139/15126	1.38458e-11	1.39051e-09	ENSG00000108179/ENSG00000198888/ENSG00000090266/ENSG00000164405/ENSG00000198763/ENSG00000147684/ENSG00000198804/ENSG00000174917/ENSG00000109519/ENSG00000154723/ENSG00000116288/ENSG00000198727/ENSG00000124172/ENSG00000147123/ENSG00000189043/ENSG00000145494/ENSG00000198712/ENSG00000168653/ENSG00000159199/ENSG00000241468/ENSG00000131143/ENSG00000111775/ENSG00000173915/ENSG00000134809/ENSG00000184983…	PPIF/MT-ND1/NDUFB2/UQCRQ/MT-ND2/NDUFB9/MT-CO1/C19orf70/GRPEL1/ATP5PF/PARK7/MT-CYB/ATP5F1E/NDUFB11/NDUFA4/NDUFS6/MT-CO2/NDUFS5/ATP5MC1/ATP5MF/COX4I1/COX6A1/ATP5MD/TIMM10/NDUFA6/COX8A/NDUFB7/MT-CO3/COX5B/NDUFC2/UQCRH/ATP5PD/NDUFA1/ATP5F1D/TIMM50/NDUFA2/NDUFB10/NDUFB1/NDUFA8/NDUFC1/NDUFA11/ATP5PB/ATP5MC3/NDUFAB1/ATP5ME/ATP5MPL/CYC1/COX7C/BCS1L/ATP5IF1/MT-ND3/NDUFS4/NDUFB5/NDUFA3/NDUFB4/MCU/NDUFB6/UQ…	70	2	ENSG00000156026/ENSG00000178127	68	ENSG00000108179/ENSG00000198888/ENSG00000090266/ENSG00000164405/ENSG00000198763/ENSG00000147684/ENSG00000198804/ENSG00000174917/ENSG00000109519/ENSG00000154723/ENSG00000116288/ENSG00000198727/ENSG00000124172/ENSG00000147123/ENSG00000189043/ENSG00000145494/ENSG00000198712/ENSG00000168653/ENSG00000159199/ENSG00000241468/ENSG00000131143/ENSG00000111775/ENSG00000173915/ENSG00000134809/ENSG00000184983…
CC	GO:0098803	respiratory chain complex	48/3635	82/15126	2.37512e-11	2.08713e-09	ENSG00000198888/ENSG00000090266/ENSG00000164405/ENSG00000198763/ENSG00000147684/ENSG00000198804/ENSG00000116288/ENSG00000198727/ENSG00000147123/ENSG00000189043/ENSG00000145494/ENSG00000198712/ENSG00000168653/ENSG00000131143/ENSG00000111775/ENSG00000184983/ENSG00000176340/ENSG00000099795/ENSG00000198938/ENSG00000135940/ENSG00000151366/ENSG00000173660/ENSG00000125356/ENSG00000131495/ENSG00000140990…	MT-ND1/NDUFB2/UQCRQ/MT-ND2/NDUFB9/MT-CO1/PARK7/MT-CYB/NDUFB11/NDUFA4/NDUFS6/MT-CO2/NDUFS5/COX4I1/COX6A1/NDUFA6/COX8A/NDUFB7/MT-CO3/COX5B/NDUFC2/UQCRH/NDUFA1/NDUFA2/NDUFB10/NDUFB1/NDUFA8/NDUFC1/NDUFA11/NDUFAB1/CYC1/COX7C/BCS1L/MT-ND3/NDUFS4/NDUFB5/NDUFA3/NDUFB4/NDUFB6/UQCR10/NDUFAF1/NDUFB3/UQCC3/NDUFA4L2/NDUFB8/UQCRHL/NDUFV2/C15orf48	48	1	ENSG00000178127	47	ENSG00000198888/ENSG00000090266/ENSG00000164405/ENSG00000198763/ENSG00000147684/ENSG00000198804/ENSG00000116288/ENSG00000198727/ENSG00000147123/ENSG00000189043/ENSG00000145494/ENSG00000198712/ENSG00000168653/ENSG00000131143/ENSG00000111775/ENSG00000184983/ENSG00000176340/ENSG00000099795/ENSG00000198938/ENSG00000135940/ENSG00000151366/ENSG00000173660/ENSG00000125356/ENSG00000131495/ENSG00000140990…
CC	GO:0005746	mitochondrial respiratory chain	50/3635	89/15126	7.30041e-11	5.70243e-09	ENSG00000198888/ENSG00000090266/ENSG00000164405/ENSG00000198763/ENSG00000147684/ENSG00000198804/ENSG00000116288/ENSG00000112695/ENSG00000198727/ENSG00000147123/ENSG00000189043/ENSG00000145494/ENSG00000198712/ENSG00000168653/ENSG00000131143/ENSG00000111775/ENSG00000184983/ENSG00000176340/ENSG00000099795/ENSG00000198938/ENSG00000135940/ENSG00000151366/ENSG00000173660/ENSG00000125356/ENSG00000131495…	MT-ND1/NDUFB2/UQCRQ/MT-ND2/NDUFB9/MT-CO1/PARK7/COX7A2/MT-CYB/NDUFB11/NDUFA4/NDUFS6/MT-CO2/NDUFS5/COX4I1/COX6A1/NDUFA6/COX8A/NDUFB7/MT-CO3/COX5B/NDUFC2/UQCRH/NDUFA1/NDUFA2/NDUFB10/NDUFB1/NDUFA8/NDUFC1/NDUFA11/NDUFAB1/CYC1/COX7C/BCS1L/SURF1/MT-ND3/NDUFS4/NDUFB5/NDUFA3/NDUFB4/NDUFB6/UQCR10/NDUFAF1/NDUFB3/UQCC3/NDUFA4L2/NDUFB8/UQCRHL/NDUFV2/C15orf48	50	1	ENSG00000178127	49	ENSG00000198888/ENSG00000090266/ENSG00000164405/ENSG00000198763/ENSG00000147684/ENSG00000198804/ENSG00000116288/ENSG00000112695/ENSG00000198727/ENSG00000147123/ENSG00000189043/ENSG00000145494/ENSG00000198712/ENSG00000168653/ENSG00000131143/ENSG00000111775/ENSG00000184983/ENSG00000176340/ENSG00000099795/ENSG00000198938/ENSG00000135940/ENSG00000151366/ENSG00000173660/ENSG00000125356/ENSG00000131495…
CC	GO:0015934	large ribosomal subunit	60/3635	117/15126	1.52676e-10	1.07332e-08	ENSG00000111639/ENSG00000089009/ENSG00000122026/ENSG00000156482/ENSG00000136942/ENSG00000147604/ENSG00000137818/ENSG00000114391/ENSG00000143314/ENSG00000182899/ENSG00000125691/ENSG00000172590/ENSG00000130255/ENSG00000163682/ENSG00000142541/ENSG00000053372/ENSG00000131469/ENSG00000037241/ENSG00000122406/ENSG00000177600/ENSG00000167526/ENSG00000108298/ENSG00000089157/ENSG00000166441/ENSG00000147403…	MRPL51/RPL6/RPL21/RPL30/RPL35/RPL7/RPLP1/RPL24/MRPL24/RPL35A/RPL23/MRPL52/RPL36/RPL9/RPL13A/MRTO4/RPL27/RPL26L1/RPL5/RPLP2/RPL13/RPL19/RPLP0/RPL27A/RPL10/RPL15/RPL34/NHP2/MRPL40/RPL32/RPL11/RPL18/UBA52/RPL8/MRPL11/RPL41/RPL7A/RPL4/RBM3/MRPL37/RPL18A/RPL10A/RPL37A/RPL39/RPL7L1/RPL29/RPL38/RPL37/RPL3/RPL26/MRPL4/RPL22L1/MRPL28/MRPL41/RPL28/MRPL23/MRPL54/RPL22/MRPL12/MRPL48	60	1	ENSG00000163584	59	ENSG00000111639/ENSG00000089009/ENSG00000122026/ENSG00000156482/ENSG00000136942/ENSG00000147604/ENSG00000137818/ENSG00000114391/ENSG00000143314/ENSG00000182899/ENSG00000125691/ENSG00000172590/ENSG00000130255/ENSG00000163682/ENSG00000142541/ENSG00000053372/ENSG00000131469/ENSG00000037241/ENSG00000122406/ENSG00000177600/ENSG00000167526/ENSG00000108298/ENSG00000089157/ENSG00000166441/ENSG00000147403…
CC	GO:0022627	cytosolic small ribosomal subunit	31/3635	45/15126	2.44268e-10	1.5611e-08	ENSG00000105372/ENSG00000186468/ENSG00000143947/ENSG00000008988/ENSG00000137154/ENSG00000171863/ENSG00000115268/ENSG00000168028/ENSG00000149273/ENSG00000110700/ENSG00000112306/ENSG00000170889/ENSG00000105193/ENSG00000198034/ENSG00000142534/ENSG00000197728/ENSG00000145425/ENSG00000142937/ENSG00000140988/ENSG00000231500/ENSG00000083845/ENSG00000118181/ENSG00000164587/ENSG00000232119/ENSG00000177954…	RPS19/RPS23/RPS27A/RPS20/RPS6/RPS7/RPS15/RPSA/RPS3/RPS13/RPS12/RPS9/RPS16/RPS4X/RPS11/RPS26/RPS3A/RPS8/RPS2/RPS18/RPS5/RPS25/RPS14/MCTS1/RPS27/RPS28/MRPS18C/RPS21/RPS15A/RPS27L/RPS29	31	0		31	ENSG00000105372/ENSG00000186468/ENSG00000143947/ENSG00000008988/ENSG00000137154/ENSG00000171863/ENSG00000115268/ENSG00000168028/ENSG00000149273/ENSG00000110700/ENSG00000112306/ENSG00000170889/ENSG00000105193/ENSG00000198034/ENSG00000142534/ENSG00000197728/ENSG00000145425/ENSG00000142937/ENSG00000140988/ENSG00000231500/ENSG00000083845/ENSG00000118181/ENSG00000164587/ENSG00000232119/ENSG00000177954…
CC	GO:0042788	polysomal ribosome	22/3635	29/15126	5.76819e-09	3.3792e-07	ENSG00000089009/ENSG00000156482/ENSG00000186468/ENSG00000114391/ENSG00000130255/ENSG00000108298/ENSG00000144713/ENSG00000102081/ENSG00000142676/ENSG00000063177/ENSG00000197728/ENSG00000161016/ENSG00000229117/ENSG00000148303/ENSG00000105640/ENSG00000198755/ENSG00000198918/ENSG00000172809/ENSG00000108256/ENSG00000233927/ENSG00000171858/ENSG00000213741	RPL6/RPL30/RPS23/RPL24/RPL36/RPL19/RPL32/FMR1/RPL11/RPL18/RPS26/RPL8/RPL41/RPL7A/RPL18A/RPL10A/RPL39/RPL38/NUFIP2/RPS28/RPS21/RPS29	22	2	ENSG00000102081/ENSG00000108256	20	ENSG00000089009/ENSG00000156482/ENSG00000186468/ENSG00000114391/ENSG00000130255/ENSG00000108298/ENSG00000144713/ENSG00000142676/ENSG00000063177/ENSG00000197728/ENSG00000161016/ENSG00000229117/ENSG00000148303/ENSG00000105640/ENSG00000198755/ENSG00000198918/ENSG00000172809/ENSG00000233927/ENSG00000171858/ENSG00000213741
CC	GO:0015935	small ribosomal subunit	39/3635	70/15126	1.21762e-08	6.58452e-07	ENSG00000062582/ENSG00000105372/ENSG00000186468/ENSG00000125445/ENSG00000182180/ENSG00000143947/ENSG00000008988/ENSG00000137154/ENSG00000171863/ENSG00000115268/ENSG00000168028/ENSG00000149273/ENSG00000110700/ENSG00000128626/ENSG00000112306/ENSG00000170889/ENSG00000105193/ENSG00000198034/ENSG00000142534/ENSG00000197728/ENSG00000145425/ENSG00000142937/ENSG00000090263/ENSG00000140988/ENSG00000231500…	MRPS24/RPS19/RPS23/MRPS7/MRPS16/RPS27A/RPS20/RPS6/RPS7/RPS15/RPSA/RPS3/RPS13/MRPS12/RPS12/RPS9/RPS16/RPS4X/RPS11/RPS26/RPS3A/RPS8/MRPS33/RPS2/RPS18/RPS5/RPS25/RPS14/MRPS17/MRPS11/MCTS1/RPS27/RPS28/MRPS18C/RPS21/RPS15A/RPS27L/RPS29/MRPS36	39	0		39	ENSG00000062582/ENSG00000105372/ENSG00000186468/ENSG00000125445/ENSG00000182180/ENSG00000143947/ENSG00000008988/ENSG00000137154/ENSG00000171863/ENSG00000115268/ENSG00000168028/ENSG00000149273/ENSG00000110700/ENSG00000128626/ENSG00000112306/ENSG00000170889/ENSG00000105193/ENSG00000198034/ENSG00000142534/ENSG00000197728/ENSG00000145425/ENSG00000142937/ENSG00000090263/ENSG00000140988/ENSG00000231500…
CC	GO:0098798	mitochondrial protein complex	101/3635	260/15126	6.14844e-08	3.08739e-06	ENSG00000062582/ENSG00000108179/ENSG00000198888/ENSG00000090266/ENSG00000164405/ENSG00000111639/ENSG00000198763/ENSG00000147684/ENSG00000198804/ENSG00000150779/ENSG00000173141/ENSG00000174917/ENSG00000125445/ENSG00000109519/ENSG00000182180/ENSG00000154723/ENSG00000116288/ENSG00000143314/ENSG00000163516/ENSG00000198727/ENSG00000124172/ENSG00000147123/ENSG00000172590/ENSG00000099800/ENSG00000189043…	MRPS24/PPIF/MT-ND1/NDUFB2/UQCRQ/MRPL51/MT-ND2/NDUFB9/MT-CO1/TIMM8B/MRPL57/C19orf70/MRPS7/GRPEL1/MRPS16/ATP5PF/PARK7/MRPL24/ANKZF1/MT-CYB/ATP5F1E/NDUFB11/MRPL52/TIMM13/NDUFA4/MRPS12/NDUFS6/MT-CO2/NDUFS5/ATP5MC1/ATP5MF/COX4I1/GADD45GIP1/COX6A1/TOMM7/ATP5MD/TIMM10/MRPL40/NDUFA6/COX8A/NDUFB7/MT-CO3/COX5B/MRPS33/NDUFC2/MRPL11/UQCRH/ATP5PD/NDUFA1/MRPL37/ATP5F1D/TIMM50/NDUFA2/NDUFB10/NDUFB1/NDUFA8/NDUFC…	101	4	ENSG00000163516/ENSG00000156026/ENSG00000154174/ENSG00000178127	97	ENSG00000062582/ENSG00000108179/ENSG00000198888/ENSG00000090266/ENSG00000164405/ENSG00000111639/ENSG00000198763/ENSG00000147684/ENSG00000198804/ENSG00000150779/ENSG00000173141/ENSG00000174917/ENSG00000125445/ENSG00000109519/ENSG00000182180/ENSG00000154723/ENSG00000116288/ENSG00000143314/ENSG00000198727/ENSG00000124172/ENSG00000147123/ENSG00000172590/ENSG00000099800/ENSG00000189043/ENSG00000128626…
CC	GO:0005747	mitochondrial respiratory chain complex I	30/3635	51/15126	1.13138e-07	4.67857e-06	ENSG00000198888/ENSG00000090266/ENSG00000198763/ENSG00000147684/ENSG00000116288/ENSG00000147123/ENSG00000189043/ENSG00000145494/ENSG00000168653/ENSG00000184983/ENSG00000099795/ENSG00000151366/ENSG00000125356/ENSG00000131495/ENSG00000140990/ENSG00000183648/ENSG00000119421/ENSG00000109390/ENSG00000174886/ENSG00000004779/ENSG00000198840/ENSG00000164258/ENSG00000136521/ENSG00000170906/ENSG00000065518…	MT-ND1/NDUFB2/MT-ND2/NDUFB9/PARK7/NDUFB11/NDUFA4/NDUFS6/NDUFS5/NDUFA6/NDUFB7/NDUFC2/NDUFA1/NDUFA2/NDUFB10/NDUFB1/NDUFA8/NDUFC1/NDUFA11/NDUFAB1/MT-ND3/NDUFS4/NDUFB5/NDUFA3/NDUFB4/NDUFB6/NDUFAF1/NDUFB3/NDUFB8/NDUFV2	30	1	ENSG00000178127	29	ENSG00000198888/ENSG00000090266/ENSG00000198763/ENSG00000147684/ENSG00000116288/ENSG00000147123/ENSG00000189043/ENSG00000145494/ENSG00000168653/ENSG00000184983/ENSG00000099795/ENSG00000151366/ENSG00000125356/ENSG00000131495/ENSG00000140990/ENSG00000183648/ENSG00000119421/ENSG00000109390/ENSG00000174886/ENSG00000004779/ENSG00000198840/ENSG00000164258/ENSG00000136521/ENSG00000170906/ENSG00000065518…
CC	GO:0030964	NADH dehydrogenase complex	30/3635	51/15126	1.13138e-07	4.67857e-06	ENSG00000198888/ENSG00000090266/ENSG00000198763/ENSG00000147684/ENSG00000116288/ENSG00000147123/ENSG00000189043/ENSG00000145494/ENSG00000168653/ENSG00000184983/ENSG00000099795/ENSG00000151366/ENSG00000125356/ENSG00000131495/ENSG00000140990/ENSG00000183648/ENSG00000119421/ENSG00000109390/ENSG00000174886/ENSG00000004779/ENSG00000198840/ENSG00000164258/ENSG00000136521/ENSG00000170906/ENSG00000065518…	MT-ND1/NDUFB2/MT-ND2/NDUFB9/PARK7/NDUFB11/NDUFA4/NDUFS6/NDUFS5/NDUFA6/NDUFB7/NDUFC2/NDUFA1/NDUFA2/NDUFB10/NDUFB1/NDUFA8/NDUFC1/NDUFA11/NDUFAB1/MT-ND3/NDUFS4/NDUFB5/NDUFA3/NDUFB4/NDUFB6/NDUFAF1/NDUFB3/NDUFB8/NDUFV2	30	1	ENSG00000178127	29	ENSG00000198888/ENSG00000090266/ENSG00000198763/ENSG00000147684/ENSG00000116288/ENSG00000147123/ENSG00000189043/ENSG00000145494/ENSG00000168653/ENSG00000184983/ENSG00000099795/ENSG00000151366/ENSG00000125356/ENSG00000131495/ENSG00000140990/ENSG00000183648/ENSG00000119421/ENSG00000109390/ENSG00000174886/ENSG00000004779/ENSG00000198840/ENSG00000164258/ENSG00000136521/ENSG00000170906/ENSG00000065518…
CC	GO:0045271	respiratory chain complex I	30/3635	51/15126	1.13138e-07	4.67857e-06	ENSG00000198888/ENSG00000090266/ENSG00000198763/ENSG00000147684/ENSG00000116288/ENSG00000147123/ENSG00000189043/ENSG00000145494/ENSG00000168653/ENSG00000184983/ENSG00000099795/ENSG00000151366/ENSG00000125356/ENSG00000131495/ENSG00000140990/ENSG00000183648/ENSG00000119421/ENSG00000109390/ENSG00000174886/ENSG00000004779/ENSG00000198840/ENSG00000164258/ENSG00000136521/ENSG00000170906/ENSG00000065518…	MT-ND1/NDUFB2/MT-ND2/NDUFB9/PARK7/NDUFB11/NDUFA4/NDUFS6/NDUFS5/NDUFA6/NDUFB7/NDUFC2/NDUFA1/NDUFA2/NDUFB10/NDUFB1/NDUFA8/NDUFC1/NDUFA11/NDUFAB1/MT-ND3/NDUFS4/NDUFB5/NDUFA3/NDUFB4/NDUFB6/NDUFAF1/NDUFB3/NDUFB8/NDUFV2	30	1	ENSG00000178127	29	ENSG00000198888/ENSG00000090266/ENSG00000198763/ENSG00000147684/ENSG00000116288/ENSG00000147123/ENSG00000189043/ENSG00000145494/ENSG00000168653/ENSG00000184983/ENSG00000099795/ENSG00000151366/ENSG00000125356/ENSG00000131495/ENSG00000140990/ENSG00000183648/ENSG00000119421/ENSG00000109390/ENSG00000174886/ENSG00000004779/ENSG00000198840/ENSG00000164258/ENSG00000136521/ENSG00000170906/ENSG00000065518…
CC	GO:0070069	cytochrome complex	21/3635	30/15126	1.32483e-07	5.17418e-06	ENSG00000164405/ENSG00000198804/ENSG00000198727/ENSG00000189043/ENSG00000198712/ENSG00000131143/ENSG00000111775/ENSG00000176340/ENSG00000198938/ENSG00000135940/ENSG00000173660/ENSG00000179091/ENSG00000127184/ENSG00000074582/ENSG00000184076/ENSG00000006695/ENSG00000204922/ENSG00000185633/ENSG00000233954/ENSG00000241635/ENSG00000166920	UQCRQ/MT-CO1/MT-CYB/NDUFA4/MT-CO2/COX4I1/COX6A1/COX8A/MT-CO3/COX5B/UQCRH/CYC1/COX7C/BCS1L/UQCR10/COX10/UQCC3/NDUFA4L2/UQCRHL/UGT1A1/C15orf48	21	2	ENSG00000006695/ENSG00000241635	19	ENSG00000164405/ENSG00000198804/ENSG00000198727/ENSG00000189043/ENSG00000198712/ENSG00000131143/ENSG00000111775/ENSG00000176340/ENSG00000198938/ENSG00000135940/ENSG00000173660/ENSG00000179091/ENSG00000127184/ENSG00000074582/ENSG00000184076/ENSG00000204922/ENSG00000185633/ENSG00000233954/ENSG00000166920
CC	GO:0044455	mitochondrial membrane part	84/3635	213/15126	3.67286e-07	1.35896e-05	ENSG00000108179/ENSG00000198888/ENSG00000090266/ENSG00000164405/ENSG00000198763/ENSG00000147684/ENSG00000198804/ENSG00000174917/ENSG00000109519/ENSG00000154723/ENSG00000254087/ENSG00000116288/ENSG00000112695/ENSG00000163516/ENSG00000198727/ENSG00000124172/ENSG00000147123/ENSG00000189043/ENSG00000183978/ENSG00000151729/ENSG00000145494/ENSG00000198712/ENSG00000168653/ENSG00000159199/ENSG00000241468…	PPIF/MT-ND1/NDUFB2/UQCRQ/MT-ND2/NDUFB9/MT-CO1/C19orf70/GRPEL1/ATP5PF/LYN/PARK7/COX7A2/ANKZF1/MT-CYB/ATP5F1E/NDUFB11/NDUFA4/COA3/SLC25A4/NDUFS6/MT-CO2/NDUFS5/ATP5MC1/ATP5MF/COX4I1/COX6A1/TOMM7/ATP5MD/TIMM10/NDUFA6/COX8A/NDUFB7/MT-CO3/COX5B/NDUFC2/UQCRH/ATP5PD/COX6B2/NDUFA1/ATP5F1D/TIMM50/NDUFA2/NDUFB10/NDUFB1/NDUFA8/NDUFC1/NDUFA11/ATP5PB/ATP5MC3/NDUFAB1/ATP5ME/ATP5MPL/CYC1/COX7C/BCS1L/ATP5IF1/SURF…	84	9	ENSG00000254087/ENSG00000163516/ENSG00000160471/ENSG00000156026/ENSG00000030110/ENSG00000213463/ENSG00000154174/ENSG00000178127/ENSG00000160785	75	ENSG00000108179/ENSG00000198888/ENSG00000090266/ENSG00000164405/ENSG00000198763/ENSG00000147684/ENSG00000198804/ENSG00000174917/ENSG00000109519/ENSG00000154723/ENSG00000116288/ENSG00000112695/ENSG00000198727/ENSG00000124172/ENSG00000147123/ENSG00000189043/ENSG00000183978/ENSG00000151729/ENSG00000145494/ENSG00000198712/ENSG00000168653/ENSG00000159199/ENSG00000241468/ENSG00000131143/ENSG00000111775…
CC	GO:0000786	nucleosome	41/3635	83/15126	4.45906e-07	1.56736e-05	ENSG00000188486/ENSG00000164032/ENSG00000184678/ENSG00000163041/ENSG00000083168/ENSG00000274267/ENSG00000189060/ENSG00000196890/ENSG00000158373/ENSG00000277075/ENSG00000156650/ENSG00000278828/ENSG00000275714/ENSG00000273802/ENSG00000197903/ENSG00000276180/ENSG00000158406/ENSG00000196787/ENSG00000275713/ENSG00000274290/ENSG00000196747/ENSG00000278272/ENSG00000272196/ENSG00000274750/ENSG00000276966…	H2AFX/H2AFZ/HIST2H2BE/H3F3A/KAT6A/HIST1H3B/H1F0/HIST3H2BB/HIST1H2BD/HIST1H2AE/KAT6B/HIST1H3H/HIST1H3A/HIST1H2BG/HIST1H2BK/HIST1H4I/HIST1H4H/HIST1H2AG/HIST1H2BH/HIST1H2BE/HIST1H2AI/HIST1H3C/HIST2H2AA4/HIST1H3E/HIST1H4E/HIST2H3D/HIST1H4D/HIST2H2AA3/HIST2H2AC/HIST1H3J/HIST1H2BI/HIST1H4J/HIST1H2AH/HIST1H2BJ/HIST1H3G/HIST2H4B/HIST1H4C/HIST1H2AL/HIST1H4K/HIST1H2BL/HIST1H2AB	41	4	ENSG00000083168/ENSG00000189060/ENSG00000156650/ENSG00000124635	37	ENSG00000188486/ENSG00000164032/ENSG00000184678/ENSG00000163041/ENSG00000274267/ENSG00000196890/ENSG00000158373/ENSG00000277075/ENSG00000278828/ENSG00000275714/ENSG00000273802/ENSG00000197903/ENSG00000276180/ENSG00000158406/ENSG00000196787/ENSG00000275713/ENSG00000274290/ENSG00000196747/ENSG00000278272/ENSG00000272196/ENSG00000274750/ENSG00000276966/ENSG00000183598/ENSG00000277157/ENSG00000203812…
CC	GO:0005667	transcription factor complex	111/3635	307/15126	1.03238e-06	3.45603e-05	ENSG00000129194/ENSG00000197451/ENSG00000169136/ENSG00000124813/ENSG00000204103/ENSG00000166949/ENSG00000144485/ENSG00000116560/ENSG00000178913/ENSG00000124496/ENSG00000078900/ENSG00000130726/ENSG00000143190/ENSG00000089902/ENSG00000273841/ENSG00000148737/ENSG00000128272/ENSG00000116679/ENSG00000119508/ENSG00000186350/ENSG00000143575/ENSG00000116128/ENSG00000204304/ENSG00000107223/ENSG00000171681…	SOX15/HNRNPAB/ATF5/RUNX2/MAFB/SMAD3/HES6/SFPQ/TAF7/TRERF1/TP73/TRIM28/POU2F1/RCOR1/TAF9/TCF7L2/ATF4/IVNS1ABP/NR4A3/RXRA/HAX1/BCL9/PBX2/EDF1/ATF7IP/NFAT5/SIN3A/CDK4/ABT1/TAF8/TP63/HDAC9/TEAD1/SMAD5/FOS/CDK7/MED18/TAF1/ZFHX3/ARNT/PPARD/XRCC6/ARNTL/RORA/E2F5/TLE4/EPAS1/USF1/BCL9L/SNAI3/TAF1D/ERCC1/GATA3/VDR/RBPJ/REL/LDB1/TEAD3/GTF2A2/PBX1/TLE3/CD3EAP/RBL2/GTF3C6/ELMSAN1/HOXA9/SMAD6/PPARA/E2F1/AJUBA/…	111	79	ENSG00000124813/ENSG00000166949/ENSG00000124496/ENSG00000078900/ENSG00000143190/ENSG00000089902/ENSG00000148737/ENSG00000116679/ENSG00000186350/ENSG00000116128/ENSG00000204304/ENSG00000171681/ENSG00000102908/ENSG00000169375/ENSG00000137413/ENSG00000073282/ENSG00000048052/ENSG00000187079/ENSG00000113658/ENSG00000170345/ENSG00000134058/ENSG00000147133/ENSG00000140836/ENSG00000143437/ENSG00000112033…	32	ENSG00000129194/ENSG00000197451/ENSG00000169136/ENSG00000204103/ENSG00000144485/ENSG00000116560/ENSG00000178913/ENSG00000130726/ENSG00000273841/ENSG00000128272/ENSG00000119508/ENSG00000143575/ENSG00000107223/ENSG00000135446/ENSG00000146109/ENSG00000130772/ENSG00000196419/ENSG00000012061/ENSG00000140307/ENSG00000117877/ENSG00000155115/ENSG00000101412/ENSG00000129474/ENSG00000272047/ENSG00000160783…
CC	GO:0044815	DNA packaging complex	41/3635	90/15126	6.18435e-06	0.000197618	ENSG00000188486/ENSG00000164032/ENSG00000184678/ENSG00000163041/ENSG00000083168/ENSG00000274267/ENSG00000189060/ENSG00000196890/ENSG00000158373/ENSG00000277075/ENSG00000156650/ENSG00000278828/ENSG00000275714/ENSG00000273802/ENSG00000197903/ENSG00000276180/ENSG00000158406/ENSG00000196787/ENSG00000275713/ENSG00000274290/ENSG00000196747/ENSG00000278272/ENSG00000272196/ENSG00000274750/ENSG00000276966…	H2AFX/H2AFZ/HIST2H2BE/H3F3A/KAT6A/HIST1H3B/H1F0/HIST3H2BB/HIST1H2BD/HIST1H2AE/KAT6B/HIST1H3H/HIST1H3A/HIST1H2BG/HIST1H2BK/HIST1H4I/HIST1H4H/HIST1H2AG/HIST1H2BH/HIST1H2BE/HIST1H2AI/HIST1H3C/HIST2H2AA4/HIST1H3E/HIST1H4E/HIST2H3D/HIST1H4D/HIST2H2AA3/HIST2H2AC/HIST1H3J/HIST1H2BI/HIST1H4J/HIST1H2AH/HIST1H2BJ/HIST1H3G/HIST2H4B/HIST1H4C/HIST1H2AL/HIST1H4K/HIST1H2BL/HIST1H2AB	41	4	ENSG00000083168/ENSG00000189060/ENSG00000156650/ENSG00000124635	37	ENSG00000188486/ENSG00000164032/ENSG00000184678/ENSG00000163041/ENSG00000274267/ENSG00000196890/ENSG00000158373/ENSG00000277075/ENSG00000278828/ENSG00000275714/ENSG00000273802/ENSG00000197903/ENSG00000276180/ENSG00000158406/ENSG00000196787/ENSG00000275713/ENSG00000274290/ENSG00000196747/ENSG00000278272/ENSG00000272196/ENSG00000274750/ENSG00000276966/ENSG00000183598/ENSG00000277157/ENSG00000203812…
CC	GO:0005753	mitochondrial proton-transporting ATP synthase complex	15/3635	23/15126	3.2578e-05	0.000995754	ENSG00000108179/ENSG00000154723/ENSG00000124172/ENSG00000159199/ENSG00000241468/ENSG00000173915/ENSG00000167863/ENSG00000099624/ENSG00000116459/ENSG00000154518/ENSG00000169020/ENSG00000156411/ENSG00000130770/ENSG00000135390/ENSG00000167283	PPIF/ATP5PF/ATP5F1E/ATP5MC1/ATP5MF/ATP5MD/ATP5PD/ATP5F1D/ATP5PB/ATP5MC3/ATP5ME/ATP5MPL/ATP5IF1/ATP5MC2/ATP5MG	15	0		15	ENSG00000108179/ENSG00000154723/ENSG00000124172/ENSG00000159199/ENSG00000241468/ENSG00000173915/ENSG00000167863/ENSG00000099624/ENSG00000116459/ENSG00000154518/ENSG00000169020/ENSG00000156411/ENSG00000130770/ENSG00000135390/ENSG00000167283
CC	GO:0005743	mitochondrial inner membrane	154/3635	484/15126	4.66445e-05	0.0013663	ENSG00000062582/ENSG00000108179/ENSG00000198888/ENSG00000090266/ENSG00000164405/ENSG00000197119/ENSG00000111639/ENSG00000198763/ENSG00000147684/ENSG00000113845/ENSG00000198804/ENSG00000172115/ENSG00000150779/ENSG00000173141/ENSG00000174917/ENSG00000125445/ENSG00000109519/ENSG00000182180/ENSG00000154723/ENSG00000254087/ENSG00000125995/ENSG00000116288/ENSG00000143314/ENSG00000004961/ENSG00000112695…	MRPS24/PPIF/MT-ND1/NDUFB2/UQCRQ/SLC25A29/MRPL51/MT-ND2/NDUFB9/TIMMDC1/MT-CO1/CYCS/TIMM8B/MRPL57/C19orf70/MRPS7/GRPEL1/MRPS16/ATP5PF/LYN/ROMO1/PARK7/MRPL24/HCCS/COX7A2/MT-CYB/ERAL1/ATP5F1E/NDUFB11/MRPL52/RPS3/TIMM13/SLC25A12/NDUFA4/MRPS12/COA3/SLC25A4/NDUFS6/MT-CO2/AURKAIP1/NDUFS5/ATP5MC1/ATP5MF/COX4I1/COX6C/COX6A1/ATP5MD/TIMM10/MRPL40/NDUFA6/COX8A/NDUFB7/SLC25A36/UQCC2/MT-CO3/COX5B/SHMT2/MRPS33/N…	154	18	ENSG00000197119/ENSG00000254087/ENSG00000115840/ENSG00000114120/ENSG00000160471/ENSG00000155287/ENSG00000243708/ENSG00000156026/ENSG00000006695/ENSG00000153291/ENSG00000197122/ENSG00000174032/ENSG00000178127/ENSG00000004799/ENSG00000181035/ENSG00000160785/ENSG00000140459/ENSG00000169682	136	ENSG00000062582/ENSG00000108179/ENSG00000198888/ENSG00000090266/ENSG00000164405/ENSG00000111639/ENSG00000198763/ENSG00000147684/ENSG00000113845/ENSG00000198804/ENSG00000172115/ENSG00000150779/ENSG00000173141/ENSG00000174917/ENSG00000125445/ENSG00000109519/ENSG00000182180/ENSG00000154723/ENSG00000125995/ENSG00000116288/ENSG00000143314/ENSG00000004961/ENSG00000112695/ENSG00000198727/ENSG00000132591…
CC	GO:0045259	proton-transporting ATP synthase complex	15/3635	24/15126	6.75514e-05	0.00189954	ENSG00000108179/ENSG00000154723/ENSG00000124172/ENSG00000159199/ENSG00000241468/ENSG00000173915/ENSG00000167863/ENSG00000099624/ENSG00000116459/ENSG00000154518/ENSG00000169020/ENSG00000156411/ENSG00000130770/ENSG00000135390/ENSG00000167283	PPIF/ATP5PF/ATP5F1E/ATP5MC1/ATP5MF/ATP5MD/ATP5PD/ATP5F1D/ATP5PB/ATP5MC3/ATP5ME/ATP5MPL/ATP5IF1/ATP5MC2/ATP5MG	15	0		15	ENSG00000108179/ENSG00000154723/ENSG00000124172/ENSG00000159199/ENSG00000241468/ENSG00000173915/ENSG00000167863/ENSG00000099624/ENSG00000116459/ENSG00000154518/ENSG00000169020/ENSG00000156411/ENSG00000130770/ENSG00000135390/ENSG00000167283
CC	GO:0005751	mitochondrial respiratory chain complex IV	11/3635	15/15126	7.74496e-05	0.00209412	ENSG00000198804/ENSG00000189043/ENSG00000198712/ENSG00000131143/ENSG00000111775/ENSG00000176340/ENSG00000198938/ENSG00000135940/ENSG00000127184/ENSG00000185633/ENSG00000166920	MT-CO1/NDUFA4/MT-CO2/COX4I1/COX6A1/COX8A/MT-CO3/COX5B/COX7C/NDUFA4L2/C15orf48	11	0		11	ENSG00000198804/ENSG00000189043/ENSG00000198712/ENSG00000131143/ENSG00000111775/ENSG00000176340/ENSG00000198938/ENSG00000135940/ENSG00000127184/ENSG00000185633/ENSG00000166920
CC	GO:0000276	mitochondrial proton-transporting ATP synthase complex, coupling factor F(o)	9/3635	11/15126	8.97862e-05	0.00233777	ENSG00000154723/ENSG00000159199/ENSG00000241468/ENSG00000167863/ENSG00000116459/ENSG00000154518/ENSG00000169020/ENSG00000135390/ENSG00000167283	ATP5PF/ATP5MC1/ATP5MF/ATP5PD/ATP5PB/ATP5MC3/ATP5ME/ATP5MC2/ATP5MG	9	0		9	ENSG00000154723/ENSG00000159199/ENSG00000241468/ENSG00000167863/ENSG00000116459/ENSG00000154518/ENSG00000169020/ENSG00000135390/ENSG00000167283
CC	GO:0045277	respiratory chain complex IV	11/3635	16/15126	0.000193808	0.00486597	ENSG00000198804/ENSG00000189043/ENSG00000198712/ENSG00000131143/ENSG00000111775/ENSG00000176340/ENSG00000198938/ENSG00000135940/ENSG00000127184/ENSG00000185633/ENSG00000166920	MT-CO1/NDUFA4/MT-CO2/COX4I1/COX6A1/COX8A/MT-CO3/COX5B/COX7C/NDUFA4L2/C15orf48	11	0		11	ENSG00000198804/ENSG00000189043/ENSG00000198712/ENSG00000131143/ENSG00000111775/ENSG00000176340/ENSG00000198938/ENSG00000135940/ENSG00000127184/ENSG00000185633/ENSG00000166920
CC	GO:0001533	cornified envelope	26/3635	56/15126	0.0002043	0.0049525	ENSG00000163216/ENSG00000203783/ENSG00000241794/ENSG00000203785/ENSG00000244094/ENSG00000169469/ENSG00000185966/ENSG00000184363/ENSG00000184148/ENSG00000163202/ENSG00000169474/ENSG00000189337/ENSG00000124102/ENSG00000143631/ENSG00000197084/ENSG00000240386/ENSG00000185962/ENSG00000175315/ENSG00000163209/ENSG00000186226/ENSG00000198854/ENSG00000203784/ENSG00000163207/ENSG00000197915/ENSG00000196734…	SPRR2D/PRR9/SPRR2A/SPRR2E/SPRR2F/SPRR1B/LCE3E/PKP3/SPRR4/LCE3D/SPRR1A/KAZN/PI3/FLG/LCE1C/LCE1F/LCE3A/CST6/SPRR3/LCE1E/C1orf68/LELP1/IVL/HRNR/LCE1B/SPRR2B	26	1	ENSG00000189337	25	ENSG00000163216/ENSG00000203783/ENSG00000241794/ENSG00000203785/ENSG00000244094/ENSG00000169469/ENSG00000185966/ENSG00000184363/ENSG00000184148/ENSG00000163202/ENSG00000169474/ENSG00000124102/ENSG00000143631/ENSG00000197084/ENSG00000240386/ENSG00000185962/ENSG00000175315/ENSG00000163209/ENSG00000186226/ENSG00000198854/ENSG00000203784/ENSG00000163207/ENSG00000197915/ENSG00000196734/ENSG00000196805
CC	GO:0000785	chromatin	150/3635	486/15126	0.000288319	0.00675629	ENSG00000188486/ENSG00000124151/ENSG00000124216/ENSG00000124813/ENSG00000133247/ENSG00000143614/ENSG00000166949/ENSG00000164032/ENSG00000185591/ENSG00000172428/ENSG00000116560/ENSG00000149503/ENSG00000164442/ENSG00000147050/ENSG00000078900/ENSG00000130726/ENSG00000171988/ENSG00000184678/ENSG00000076108/ENSG00000132341/ENSG00000148737/ENSG00000253368/ENSG00000075624/ENSG00000174744/ENSG00000116288…	H2AFX/NCOA3/SNAI1/RUNX2/KMT5C/GATAD2B/SMAD3/H2AFZ/SP1/COPS9/SFPQ/INCENP/CITED2/KDM6A/TP73/TRIM28/JMJD1C/HIST2H2BE/BAZ2A/RAN/TCF7L2/TRNP1/ACTB/BRMS1/PARK7/RXRA/USP3/ETV3/RSF1/H3F3A/MEF2D/POGZ/KAT6A/BRD8/SIN3A/CPSF6/CBX6/RUVBL1/SAP130/CDK4/L3MBTL1/HIST1H3B/EXOSC4/PPARGC1A/PML/H1F0/HIST3H2BB/ARID1B/MCM7/TP63/HIST1H2BD/MXD1/TAF1/KDM4A/SS18L1/CENPC/BAHCC1/PPARD/CHMP2A/TIPIN/IRF1/KMT2E/USF1/GATA3/ZNHIT…	150	75	ENSG00000124151/ENSG00000124813/ENSG00000133247/ENSG00000143614/ENSG00000166949/ENSG00000185591/ENSG00000149503/ENSG00000147050/ENSG00000078900/ENSG00000171988/ENSG00000076108/ENSG00000148737/ENSG00000186350/ENSG00000140455/ENSG00000117036/ENSG00000048649/ENSG00000116604/ENSG00000143442/ENSG00000083168/ENSG00000112983/ENSG00000169375/ENSG00000183741/ENSG00000136715/ENSG00000185513/ENSG00000109819…	75	ENSG00000188486/ENSG00000124216/ENSG00000164032/ENSG00000172428/ENSG00000116560/ENSG00000164442/ENSG00000130726/ENSG00000184678/ENSG00000132341/ENSG00000253368/ENSG00000075624/ENSG00000174744/ENSG00000116288/ENSG00000163041/ENSG00000111605/ENSG00000175792/ENSG00000135446/ENSG00000274267/ENSG00000178896/ENSG00000196890/ENSG00000166508/ENSG00000158373/ENSG00000130724/ENSG00000075131/ENSG00000106400…
CC	GO:0090575	RNA polymerase II transcription factor complex	52/3635	142/15126	0.000505795	0.0111935	ENSG00000197451/ENSG00000116560/ENSG00000178913/ENSG00000130726/ENSG00000143190/ENSG00000273841/ENSG00000148737/ENSG00000128272/ENSG00000186350/ENSG00000116128/ENSG00000107223/ENSG00000137413/ENSG00000187079/ENSG00000170345/ENSG00000134058/ENSG00000130772/ENSG00000147133/ENSG00000143437/ENSG00000112033/ENSG00000069667/ENSG00000106829/ENSG00000186174/ENSG00000012061/ENSG00000111424/ENSG00000198728…	HNRNPAB/SFPQ/TAF7/TRIM28/POU2F1/TAF9/TCF7L2/ATF4/RXRA/BCL9/EDF1/TAF8/TEAD1/FOS/CDK7/MED18/TAF1/ARNT/PPARD/RORA/TLE4/BCL9L/ERCC1/VDR/LDB1/GTF2A2/PBX1/TLE3/PPARA/E2F1/HIF1A/NFYA/GTF2H5/JUN/TAF3/HIPK2/TBPL1/E2F2/NR1D2/TAF10/TCF4/TAF11/TAF5/GTF2A1/TAF6L/ING2/POU2AF1/GTF2H4/ASCL5/RORB/ASCL2/NR1I3	52	36	ENSG00000143190/ENSG00000148737/ENSG00000186350/ENSG00000116128/ENSG00000137413/ENSG00000187079/ENSG00000170345/ENSG00000134058/ENSG00000147133/ENSG00000143437/ENSG00000112033/ENSG00000069667/ENSG00000106829/ENSG00000186174/ENSG00000111424/ENSG00000198728/ENSG00000185630/ENSG00000140332/ENSG00000186951/ENSG00000100644/ENSG00000001167/ENSG00000165632/ENSG00000064393/ENSG00000028839/ENSG00000007968…	16	ENSG00000197451/ENSG00000116560/ENSG00000178913/ENSG00000130726/ENSG00000273841/ENSG00000128272/ENSG00000107223/ENSG00000130772/ENSG00000012061/ENSG00000140307/ENSG00000101412/ENSG00000272047/ENSG00000177606/ENSG00000166337/ENSG00000162227/ENSG00000183734
CC	GO:1990204	oxidoreductase complex	42/3635	109/15126	0.000509521	0.0111935	ENSG00000198888/ENSG00000090266/ENSG00000164405/ENSG00000198763/ENSG00000147684/ENSG00000198804/ENSG00000116288/ENSG00000198727/ENSG00000147123/ENSG00000189043/ENSG00000145494/ENSG00000168653/ENSG00000051523/ENSG00000184983/ENSG00000099795/ENSG00000151366/ENSG00000173660/ENSG00000125356/ENSG00000131495/ENSG00000140990/ENSG00000183648/ENSG00000119421/ENSG00000109390/ENSG00000174886/ENSG00000004779…	MT-ND1/NDUFB2/UQCRQ/MT-ND2/NDUFB9/MT-CO1/PARK7/MT-CYB/NDUFB11/NDUFA4/NDUFS6/NDUFS5/CYBA/NDUFA6/NDUFB7/NDUFC2/UQCRH/NDUFA1/NDUFA2/NDUFB10/NDUFB1/NDUFA8/NDUFC1/NDUFA11/NDUFAB1/CYC1/BCS1L/MT-ND3/NDUFS4/NDUFB5/NDUFA3/NDUFB4/NDUFB6/UQCR10/NDUFAF1/NDUFB3/UQCC3/NDUFB8/UQCRHL/MRPS36/NDUFV2/GPD1	42	1	ENSG00000178127	41	ENSG00000198888/ENSG00000090266/ENSG00000164405/ENSG00000198763/ENSG00000147684/ENSG00000198804/ENSG00000116288/ENSG00000198727/ENSG00000147123/ENSG00000189043/ENSG00000145494/ENSG00000168653/ENSG00000051523/ENSG00000184983/ENSG00000099795/ENSG00000151366/ENSG00000173660/ENSG00000125356/ENSG00000131495/ENSG00000140990/ENSG00000183648/ENSG00000119421/ENSG00000109390/ENSG00000174886/ENSG00000004779…
CC	GO:0045263	proton-transporting ATP synthase complex, coupling factor F(o)	9/3635	13/15126	0.000720446	0.0149062	ENSG00000154723/ENSG00000159199/ENSG00000241468/ENSG00000167863/ENSG00000116459/ENSG00000154518/ENSG00000169020/ENSG00000135390/ENSG00000167283	ATP5PF/ATP5MC1/ATP5MF/ATP5PD/ATP5PB/ATP5MC3/ATP5ME/ATP5MC2/ATP5MG	9	0		9	ENSG00000154723/ENSG00000159199/ENSG00000241468/ENSG00000167863/ENSG00000116459/ENSG00000154518/ENSG00000169020/ENSG00000135390/ENSG00000167283
CC	GO:0005844	polysome	29/3635	69/15126	0.000720923	0.0149062	ENSG00000089009/ENSG00000156482/ENSG00000186468/ENSG00000114391/ENSG00000089280/ENSG00000137154/ENSG00000130255/ENSG00000149273/ENSG00000108298/ENSG00000204842/ENSG00000198034/ENSG00000144713/ENSG00000102081/ENSG00000183011/ENSG00000142676/ENSG00000063177/ENSG00000197728/ENSG00000161016/ENSG00000229117/ENSG00000148303/ENSG00000105640/ENSG00000198755/ENSG00000198918/ENSG00000172809/ENSG00000108256…	RPL6/RPL30/RPS23/RPL24/FUS/RPS6/RPL36/RPS3/RPL19/ATXN2/RPS4X/RPL32/FMR1/NAA38/RPL11/RPL18/RPS26/RPL8/RPL41/RPL7A/RPL18A/RPL10A/RPL39/RPL38/NUFIP2/RPS28/RPS21/NAA30/RPS29	29	4	ENSG00000204842/ENSG00000102081/ENSG00000108256/ENSG00000139977	25	ENSG00000089009/ENSG00000156482/ENSG00000186468/ENSG00000114391/ENSG00000089280/ENSG00000137154/ENSG00000130255/ENSG00000149273/ENSG00000108298/ENSG00000198034/ENSG00000144713/ENSG00000183011/ENSG00000142676/ENSG00000063177/ENSG00000197728/ENSG00000161016/ENSG00000229117/ENSG00000148303/ENSG00000105640/ENSG00000198755/ENSG00000198918/ENSG00000172809/ENSG00000233927/ENSG00000171858/ENSG00000213741
CC	GO:0000788	nuclear nucleosome	16/3635	31/15126	0.000812618	0.016322	ENSG00000163041/ENSG00000274267/ENSG00000278828/ENSG00000275714/ENSG00000276180/ENSG00000158406/ENSG00000278272/ENSG00000274750/ENSG00000276966/ENSG00000277157/ENSG00000197153/ENSG00000197238/ENSG00000273983/ENSG00000270276/ENSG00000197061/ENSG00000273542	H3F3A/HIST1H3B/HIST1H3H/HIST1H3A/HIST1H4I/HIST1H4H/HIST1H3C/HIST1H3E/HIST1H4E/HIST1H4D/HIST1H3J/HIST1H4J/HIST1H3G/HIST2H4B/HIST1H4C/HIST1H4K	16	0		16	ENSG00000163041/ENSG00000274267/ENSG00000278828/ENSG00000275714/ENSG00000276180/ENSG00000158406/ENSG00000278272/ENSG00000274750/ENSG00000276966/ENSG00000277157/ENSG00000197153/ENSG00000197238/ENSG00000273983/ENSG00000270276/ENSG00000197061/ENSG00000273542
CC	GO:0044798	nuclear transcription factor complex	59/3635	169/15126	0.0009014	0.0176023	ENSG00000129194/ENSG00000197451/ENSG00000166949/ENSG00000116560/ENSG00000178913/ENSG00000130726/ENSG00000143190/ENSG00000273841/ENSG00000148737/ENSG00000128272/ENSG00000186350/ENSG00000116128/ENSG00000107223/ENSG00000102908/ENSG00000137413/ENSG00000187079/ENSG00000170345/ENSG00000134058/ENSG00000130772/ENSG00000147133/ENSG00000143437/ENSG00000112033/ENSG00000069667/ENSG00000106829/ENSG00000186174…	SOX15/HNRNPAB/SMAD3/SFPQ/TAF7/TRIM28/POU2F1/TAF9/TCF7L2/ATF4/RXRA/BCL9/EDF1/NFAT5/TAF8/TEAD1/FOS/CDK7/MED18/TAF1/ARNT/PPARD/RORA/TLE4/BCL9L/TAF1D/ERCC1/VDR/LDB1/GTF2A2/PBX1/TLE3/CD3EAP/GTF3C6/PPARA/E2F1/HIF1A/NFYA/GTF2H5/JUN/TAF3/HIPK2/SOX4/TBPL1/E2F2/NR1D2/TAF10/TCF4/TAF11/TAF5/GTF2A1/TAF6L/ING2/POU2AF1/GTF2H4/ASCL5/RORB/ASCL2/NR1I3	59	40	ENSG00000166949/ENSG00000143190/ENSG00000148737/ENSG00000186350/ENSG00000116128/ENSG00000102908/ENSG00000137413/ENSG00000187079/ENSG00000170345/ENSG00000134058/ENSG00000147133/ENSG00000143437/ENSG00000112033/ENSG00000069667/ENSG00000106829/ENSG00000186174/ENSG00000166012/ENSG00000111424/ENSG00000198728/ENSG00000185630/ENSG00000140332/ENSG00000186951/ENSG00000100644/ENSG00000001167/ENSG00000165632…	19	ENSG00000129194/ENSG00000197451/ENSG00000116560/ENSG00000178913/ENSG00000130726/ENSG00000273841/ENSG00000128272/ENSG00000107223/ENSG00000130772/ENSG00000012061/ENSG00000140307/ENSG00000117877/ENSG00000155115/ENSG00000101412/ENSG00000272047/ENSG00000177606/ENSG00000166337/ENSG00000162227/ENSG00000183734
CC	GO:0030687	preribosome, large subunit precursor	13/3635	24/15126	0.00140746	0.0267418	ENSG00000132603/ENSG00000117395/ENSG00000047056/ENSG00000133316/ENSG00000242372/ENSG00000067533/ENSG00000261236/ENSG00000100029/ENSG00000108592/ENSG00000179041/ENSG00000198042/ENSG00000160214/ENSG00000174145	NIP7/EBNA1BP2/WDR37/WDR74/EIF6/RRP15/BOP1/PES1/FTSJ3/RRS1/MAK16/RRP1/NWD2	13	1	ENSG00000047056	12	ENSG00000132603/ENSG00000117395/ENSG00000133316/ENSG00000242372/ENSG00000067533/ENSG00000261236/ENSG00000100029/ENSG00000108592/ENSG00000179041/ENSG00000198042/ENSG00000160214/ENSG00000174145
CC	GO:0016469	proton-transporting two-sector ATPase complex	22/3635	50/15126	0.0014988	0.0277277	ENSG00000108179/ENSG00000154723/ENSG00000124172/ENSG00000159199/ENSG00000241468/ENSG00000173915/ENSG00000167863/ENSG00000099624/ENSG00000116459/ENSG00000154518/ENSG00000169020/ENSG00000156411/ENSG00000130770/ENSG00000117410/ENSG00000128524/ENSG00000135390/ENSG00000167283/ENSG00000114573/ENSG00000185883/ENSG00000147614/ENSG00000143882/ENSG00000116039	PPIF/ATP5PF/ATP5F1E/ATP5MC1/ATP5MF/ATP5MD/ATP5PD/ATP5F1D/ATP5PB/ATP5MC3/ATP5ME/ATP5MPL/ATP5IF1/ATP6V0B/ATP6V1F/ATP5MC2/ATP5MG/ATP6V1A/ATP6V0C/ATP6V0D2/ATP6V1C2/ATP6V1B1	22	4	ENSG00000114573/ENSG00000147614/ENSG00000143882/ENSG00000116039	18	ENSG00000108179/ENSG00000154723/ENSG00000124172/ENSG00000159199/ENSG00000241468/ENSG00000173915/ENSG00000167863/ENSG00000099624/ENSG00000116459/ENSG00000154518/ENSG00000169020/ENSG00000156411/ENSG00000130770/ENSG00000117410/ENSG00000128524/ENSG00000135390/ENSG00000167283/ENSG00000185883
CC	GO:0005750	mitochondrial respiratory chain complex III	9/3635	14/15126	0.00158681	0.0278882	ENSG00000164405/ENSG00000198804/ENSG00000198727/ENSG00000173660/ENSG00000179091/ENSG00000074582/ENSG00000184076/ENSG00000204922/ENSG00000233954	UQCRQ/MT-CO1/MT-CYB/UQCRH/CYC1/BCS1L/UQCR10/UQCC3/UQCRHL	9	0		9	ENSG00000164405/ENSG00000198804/ENSG00000198727/ENSG00000173660/ENSG00000179091/ENSG00000074582/ENSG00000184076/ENSG00000204922/ENSG00000233954
CC	GO:0045275	respiratory chain complex III	9/3635	14/15126	0.00158681	0.0278882	ENSG00000164405/ENSG00000198804/ENSG00000198727/ENSG00000173660/ENSG00000179091/ENSG00000074582/ENSG00000184076/ENSG00000204922/ENSG00000233954	UQCRQ/MT-CO1/MT-CYB/UQCRH/CYC1/BCS1L/UQCR10/UQCC3/UQCRHL	9	0		9	ENSG00000164405/ENSG00000198804/ENSG00000198727/ENSG00000173660/ENSG00000179091/ENSG00000074582/ENSG00000184076/ENSG00000204922/ENSG00000233954
CC	GO:0030684	preribosome	30/3635	76/15126	0.00196553	0.0337016	ENSG00000101361/ENSG00000132603/ENSG00000117395/ENSG00000114767/ENSG00000184967/ENSG00000171863/ENSG00000047056/ENSG00000168028/ENSG00000133316/ENSG00000242372/ENSG00000189306/ENSG00000055044/ENSG00000227057/ENSG00000156697/ENSG00000067533/ENSG00000261236/ENSG00000100029/ENSG00000132467/ENSG00000108592/ENSG00000165271/ENSG00000183520/ENSG00000179041/ENSG00000198042/ENSG00000147679/ENSG00000160214…	NOP56/NIP7/EBNA1BP2/RRP9/NOC4L/RPS7/WDR37/RPSA/WDR74/EIF6/RRP7A/NOP58/WDR46/UTP14A/RRP15/BOP1/PES1/UTP3/FTSJ3/NOL6/UTP11/RRS1/MAK16/UTP23/RRP1/BYSL/LTV1/NWD2/FBLL1/PWP2	30	1	ENSG00000047056	29	ENSG00000101361/ENSG00000132603/ENSG00000117395/ENSG00000114767/ENSG00000184967/ENSG00000171863/ENSG00000168028/ENSG00000133316/ENSG00000242372/ENSG00000189306/ENSG00000055044/ENSG00000227057/ENSG00000156697/ENSG00000067533/ENSG00000261236/ENSG00000100029/ENSG00000132467/ENSG00000108592/ENSG00000165271/ENSG00000183520/ENSG00000179041/ENSG00000198042/ENSG00000147679/ENSG00000160214/ENSG00000112578…
CC	GO:1990907	beta-catenin-TCF complex	7/3635	10/15126	0.0027361	0.0448452	ENSG00000148737/ENSG00000116128/ENSG00000106829/ENSG00000186174/ENSG00000198728/ENSG00000140332/ENSG00000196628	TCF7L2/BCL9/TLE4/BCL9L/LDB1/TLE3/TCF4	7	7	ENSG00000148737/ENSG00000116128/ENSG00000106829/ENSG00000186174/ENSG00000198728/ENSG00000140332/ENSG00000196628	0
CC	GO:0000790	nuclear chromatin	100/3635	324/15126	0.00274302	0.0448452	ENSG00000188486/ENSG00000124151/ENSG00000124813/ENSG00000133247/ENSG00000143614/ENSG00000166949/ENSG00000164032/ENSG00000185591/ENSG00000172428/ENSG00000164442/ENSG00000147050/ENSG00000130726/ENSG00000148737/ENSG00000253368/ENSG00000075624/ENSG00000174744/ENSG00000186350/ENSG00000140455/ENSG00000117036/ENSG00000048649/ENSG00000163041/ENSG00000116604/ENSG00000143442/ENSG00000112983/ENSG00000169375…	H2AFX/NCOA3/RUNX2/KMT5C/GATAD2B/SMAD3/H2AFZ/SP1/COPS9/CITED2/KDM6A/TRIM28/TCF7L2/TRNP1/ACTB/BRMS1/RXRA/USP3/ETV3/RSF1/H3F3A/MEF2D/POGZ/BRD8/SIN3A/CPSF6/RUVBL1/SAP130/HIST1H3B/PPARGC1A/H1F0/ARID1B/TP63/MXD1/TAF1/SS18L1/CENPC/PPARD/TIPIN/IRF1/USF1/GATA3/ZNHIT1/PHF12/DNMT3A/LDB1/SNAI2/TNKS1BP1/TELO2/HIST1H2AE/HAT1/HIST1H3H/HIST1H3A/E2F1/RNF2/HIST1H4I/SMARCE1/NSMF/NIPBL/HMGB2/SINHCAF/HIST1H4H/SFR1/JU…	100	51	ENSG00000124151/ENSG00000124813/ENSG00000133247/ENSG00000143614/ENSG00000166949/ENSG00000185591/ENSG00000147050/ENSG00000148737/ENSG00000186350/ENSG00000140455/ENSG00000117036/ENSG00000048649/ENSG00000116604/ENSG00000143442/ENSG00000112983/ENSG00000169375/ENSG00000136715/ENSG00000109819/ENSG00000189060/ENSG00000049618/ENSG00000073282/ENSG00000059728/ENSG00000147133/ENSG00000184402/ENSG00000145241…	49	ENSG00000188486/ENSG00000164032/ENSG00000172428/ENSG00000164442/ENSG00000130726/ENSG00000253368/ENSG00000075624/ENSG00000174744/ENSG00000163041/ENSG00000111605/ENSG00000175792/ENSG00000274267/ENSG00000075131/ENSG00000106400/ENSG00000019549/ENSG00000100726/ENSG00000277075/ENSG00000128708/ENSG00000278828/ENSG00000275714/ENSG00000101412/ENSG00000276180/ENSG00000165802/ENSG00000158406/ENSG00000156384…
MF	GO:0003735	structural constituent of ribosome	94/3507	154/14419	2.45697e-22	2.68302e-19	ENSG00000062582/ENSG00000111639/ENSG00000089009/ENSG00000122026/ENSG00000156482/ENSG00000173141/ENSG00000105372/ENSG00000186468/ENSG00000125445/ENSG00000182180/ENSG00000143947/ENSG00000008988/ENSG00000136942/ENSG00000147604/ENSG00000137818/ENSG00000114391/ENSG00000143314/ENSG00000137154/ENSG00000182899/ENSG00000171863/ENSG00000115268/ENSG00000168028/ENSG00000125691/ENSG00000172590/ENSG00000130255…	MRPS24/MRPL51/RPL6/RPL21/RPL30/MRPL57/RPS19/RPS23/MRPS7/MRPS16/RPS27A/RPS20/RPL35/RPL7/RPLP1/RPL24/MRPL24/RPS6/RPL35A/RPS7/RPS15/RPSA/RPL23/MRPL52/RPL36/RPL9/RPS3/RPS13/MRPS12/RPL13A/MRTO4/RPL27/RPL26L1/RPL5/RPLP2/RPS12/RPL13/RPS9/RPL19/RPLP0/RPS16/RPS4X/RPL27A/RPL10/RPL15/RPL34/RPS11/RPL32/RPL11/RPL18/RPS26/UBA52/RPS3A/RPL8/RPS8/MRPS33/MRPL11/RPL41/RPL7A/RPL4/RPS2/MRPL37/RPL18A/RPL10A/RPL37A/RPL…	94	1	ENSG00000163584	93	ENSG00000062582/ENSG00000111639/ENSG00000089009/ENSG00000122026/ENSG00000156482/ENSG00000173141/ENSG00000105372/ENSG00000186468/ENSG00000125445/ENSG00000182180/ENSG00000143947/ENSG00000008988/ENSG00000136942/ENSG00000147604/ENSG00000137818/ENSG00000114391/ENSG00000143314/ENSG00000137154/ENSG00000182899/ENSG00000171863/ENSG00000115268/ENSG00000168028/ENSG00000125691/ENSG00000172590/ENSG00000130255…
MF	GO:0046982	protein heterodimerization activity	157/3507	430/14419	6.85932e-09	3.74519e-06	ENSG00000188486/ENSG00000129194/ENSG00000124151/ENSG00000088986/ENSG00000115350/ENSG00000204103/ENSG00000166949/ENSG00000164032/ENSG00000182197/ENSG00000110400/ENSG00000178913/ENSG00000134107/ENSG00000065361/ENSG00000184678/ENSG00000273841/ENSG00000132341/ENSG00000148343/ENSG00000128272/ENSG00000166197/ENSG00000001084/ENSG00000186350/ENSG00000130202/ENSG00000175550/ENSG00000148400/ENSG00000163041…	H2AFX/SOX15/NCOA3/DYNLL1/POLE4/MAFB/SMAD3/H2AFZ/EXT1/NECTIN1/TAF7/BHLHE40/ERBB3/HIST2H2BE/TAF9/RAN/MIGA2/ATF4/NOLC1/GCLC/RXRA/NECTIN2/DRAP1/NOTCH1/H3F3A/MEF2D/TMCC1/ATF2/TRMT112/IKZF2/HIST1H3B/HIST3H2BB/TAF8/CYBA/TOP2A/TUBB2B/POLE3/FMR1/PRMT5/TEAD1/BUD23/CLCF1/MCL1/HIST1H2BD/FOS/HMG20A/TAF1/LIMK1/IKZF4/ARNT/PPARD/ITGA2/ARNTL/ADIPOR2/EPAS1/USF1/IRAK1/MID1/IRAK2/SRGAP2C/BCL2A1/ZHX2/GTF2A2/HIST1H2AE…	157	78	ENSG00000124151/ENSG00000166949/ENSG00000182197/ENSG00000110400/ENSG00000134107/ENSG00000065361/ENSG00000148343/ENSG00000001084/ENSG00000186350/ENSG00000130202/ENSG00000148400/ENSG00000116604/ENSG00000172765/ENSG00000115966/ENSG00000030419/ENSG00000137413/ENSG00000131747/ENSG00000102081/ENSG00000187079/ENSG00000143384/ENSG00000170345/ENSG00000140382/ENSG00000147133/ENSG00000106683/ENSG00000123411…	79	ENSG00000188486/ENSG00000129194/ENSG00000088986/ENSG00000115350/ENSG00000204103/ENSG00000164032/ENSG00000178913/ENSG00000184678/ENSG00000273841/ENSG00000132341/ENSG00000128272/ENSG00000166197/ENSG00000175550/ENSG00000163041/ENSG00000173113/ENSG00000274267/ENSG00000196890/ENSG00000051523/ENSG00000137285/ENSG00000148229/ENSG00000100462/ENSG00000071462/ENSG00000175505/ENSG00000158373/ENSG00000184216…
MF	GO:0000982	transcription factor activity, RNA polymerase II proximal promoter sequence-specific DNA binding	133/3507	362/14419	6.39232e-08	2.3268e-05	ENSG00000175592/ENSG00000163435/ENSG00000185507/ENSG00000124216/ENSG00000124813/ENSG00000075426/ENSG00000204103/ENSG00000167074/ENSG00000185591/ENSG00000134107/ENSG00000106571/ENSG00000057657/ENSG00000078900/ENSG00000089902/ENSG00000159388/ENSG00000128272/ENSG00000150907/ENSG00000119508/ENSG00000179361/ENSG00000116604/ENSG00000074800/ENSG00000162599/ENSG00000171940/ENSG00000118263/ENSG00000172273…	FOSL1/ELF3/IRF7/SNAI1/RUNX2/FOSL2/MAFB/TEF/SP1/BHLHE40/GLI3/PRDM1/TP73/RCOR1/BTG2/ATF4/FOXO1/NR4A3/ARID3B/MEF2D/ENO1/NFIA/ZNF217/KLF7/HINFP/ATF2/NFAT5/GRHL1/NFIL3/TFAP2A/YBX1/KLF8/FOXK2/SREBF1/TP63/EGR1/TEAD1/BCL11A/FOS/AEBP2/MXD1/ZFHX3/ZBTB7B/NR3C1/KLF5/HES1/CREB3L2/IRF1/ARNTL/ZBTB7A/EPAS1/USF1/SIX4/KLF13/SNAI3/HOXC13/SOX12/GATA3/BACH1/NFIC/TBX3/FOXD1/RBPJ/SNAI2/EHF/DDN/PBX1/ETV6/ELF1/BHLHE41/TS…	133	108	ENSG00000163435/ENSG00000124813/ENSG00000075426/ENSG00000167074/ENSG00000185591/ENSG00000134107/ENSG00000106571/ENSG00000078900/ENSG00000089902/ENSG00000159388/ENSG00000150907/ENSG00000179361/ENSG00000116604/ENSG00000162599/ENSG00000171940/ENSG00000118263/ENSG00000172273/ENSG00000115966/ENSG00000102908/ENSG00000134317/ENSG00000165030/ENSG00000137203/ENSG00000102349/ENSG00000141568/ENSG00000072310…	25	ENSG00000175592/ENSG00000185507/ENSG00000124216/ENSG00000204103/ENSG00000057657/ENSG00000128272/ENSG00000119508/ENSG00000074800/ENSG00000065978/ENSG00000135111/ENSG00000251493/ENSG00000019549/ENSG00000181418/ENSG00000162772/ENSG00000182759/ENSG00000129654/ENSG00000177606/ENSG00000164379/ENSG00000172818/ENSG00000092067/ENSG00000129535/ENSG00000125492/ENSG00000125618/ENSG00000163132/ENSG00000183734
MF	GO:0008137	NADH dehydrogenase (ubiquinone) activity	26/3507	45/14419	1.63648e-06	0.00027285	ENSG00000198888/ENSG00000090266/ENSG00000198763/ENSG00000147684/ENSG00000189043/ENSG00000145494/ENSG00000168653/ENSG00000184983/ENSG00000099795/ENSG00000151366/ENSG00000125356/ENSG00000131495/ENSG00000140990/ENSG00000183648/ENSG00000119421/ENSG00000109390/ENSG00000004779/ENSG00000198840/ENSG00000164258/ENSG00000136521/ENSG00000170906/ENSG00000065518/ENSG00000165264/ENSG00000119013/ENSG00000166136…	MT-ND1/NDUFB2/MT-ND2/NDUFB9/NDUFA4/NDUFS6/NDUFS5/NDUFA6/NDUFB7/NDUFC2/NDUFA1/NDUFA2/NDUFB10/NDUFB1/NDUFA8/NDUFC1/NDUFAB1/MT-ND3/NDUFS4/NDUFB5/NDUFA3/NDUFB4/NDUFB6/NDUFB3/NDUFB8/NDUFV2	26	1	ENSG00000178127	25	ENSG00000198888/ENSG00000090266/ENSG00000198763/ENSG00000147684/ENSG00000189043/ENSG00000145494/ENSG00000168653/ENSG00000184983/ENSG00000099795/ENSG00000151366/ENSG00000125356/ENSG00000131495/ENSG00000140990/ENSG00000183648/ENSG00000119421/ENSG00000109390/ENSG00000004779/ENSG00000198840/ENSG00000164258/ENSG00000136521/ENSG00000170906/ENSG00000065518/ENSG00000165264/ENSG00000119013/ENSG00000166136
MF	GO:0050136	NADH dehydrogenase (quinone) activity	26/3507	45/14419	1.63648e-06	0.00027285	ENSG00000198888/ENSG00000090266/ENSG00000198763/ENSG00000147684/ENSG00000189043/ENSG00000145494/ENSG00000168653/ENSG00000184983/ENSG00000099795/ENSG00000151366/ENSG00000125356/ENSG00000131495/ENSG00000140990/ENSG00000183648/ENSG00000119421/ENSG00000109390/ENSG00000004779/ENSG00000198840/ENSG00000164258/ENSG00000136521/ENSG00000170906/ENSG00000065518/ENSG00000165264/ENSG00000119013/ENSG00000166136…	MT-ND1/NDUFB2/MT-ND2/NDUFB9/NDUFA4/NDUFS6/NDUFS5/NDUFA6/NDUFB7/NDUFC2/NDUFA1/NDUFA2/NDUFB10/NDUFB1/NDUFA8/NDUFC1/NDUFAB1/MT-ND3/NDUFS4/NDUFB5/NDUFA3/NDUFB4/NDUFB6/NDUFB3/NDUFB8/NDUFV2	26	1	ENSG00000178127	25	ENSG00000198888/ENSG00000090266/ENSG00000198763/ENSG00000147684/ENSG00000189043/ENSG00000145494/ENSG00000168653/ENSG00000184983/ENSG00000099795/ENSG00000151366/ENSG00000125356/ENSG00000131495/ENSG00000140990/ENSG00000183648/ENSG00000119421/ENSG00000109390/ENSG00000004779/ENSG00000198840/ENSG00000164258/ENSG00000136521/ENSG00000170906/ENSG00000065518/ENSG00000165264/ENSG00000119013/ENSG00000166136
MF	GO:0004129	cytochrome-c oxidase activity	17/3507	24/14419	1.9989e-06	0.00027285	ENSG00000198804/ENSG00000112695/ENSG00000189043/ENSG00000198712/ENSG00000131143/ENSG00000164919/ENSG00000111775/ENSG00000176340/ENSG00000198938/ENSG00000135940/ENSG00000127184/ENSG00000166347/ENSG00000148290/ENSG00000126267/ENSG00000006695/ENSG00000185633/ENSG00000166920	MT-CO1/COX7A2/NDUFA4/MT-CO2/COX4I1/COX6C/COX6A1/COX8A/MT-CO3/COX5B/COX7C/CYB5A/SURF1/COX6B1/COX10/NDUFA4L2/C15orf48	17	1	ENSG00000006695	16	ENSG00000198804/ENSG00000112695/ENSG00000189043/ENSG00000198712/ENSG00000131143/ENSG00000164919/ENSG00000111775/ENSG00000176340/ENSG00000198938/ENSG00000135940/ENSG00000127184/ENSG00000166347/ENSG00000148290/ENSG00000126267/ENSG00000185633/ENSG00000166920
MF	GO:0015002	heme-copper terminal oxidase activity	17/3507	24/14419	1.9989e-06	0.00027285	ENSG00000198804/ENSG00000112695/ENSG00000189043/ENSG00000198712/ENSG00000131143/ENSG00000164919/ENSG00000111775/ENSG00000176340/ENSG00000198938/ENSG00000135940/ENSG00000127184/ENSG00000166347/ENSG00000148290/ENSG00000126267/ENSG00000006695/ENSG00000185633/ENSG00000166920	MT-CO1/COX7A2/NDUFA4/MT-CO2/COX4I1/COX6C/COX6A1/COX8A/MT-CO3/COX5B/COX7C/CYB5A/SURF1/COX6B1/COX10/NDUFA4L2/C15orf48	17	1	ENSG00000006695	16	ENSG00000198804/ENSG00000112695/ENSG00000189043/ENSG00000198712/ENSG00000131143/ENSG00000164919/ENSG00000111775/ENSG00000176340/ENSG00000198938/ENSG00000135940/ENSG00000127184/ENSG00000166347/ENSG00000148290/ENSG00000126267/ENSG00000185633/ENSG00000166920
MF	GO:0016676	oxidoreductase activity, acting on a heme group of donors, oxygen as acceptor	17/3507	24/14419	1.9989e-06	0.00027285	ENSG00000198804/ENSG00000112695/ENSG00000189043/ENSG00000198712/ENSG00000131143/ENSG00000164919/ENSG00000111775/ENSG00000176340/ENSG00000198938/ENSG00000135940/ENSG00000127184/ENSG00000166347/ENSG00000148290/ENSG00000126267/ENSG00000006695/ENSG00000185633/ENSG00000166920	MT-CO1/COX7A2/NDUFA4/MT-CO2/COX4I1/COX6C/COX6A1/COX8A/MT-CO3/COX5B/COX7C/CYB5A/SURF1/COX6B1/COX10/NDUFA4L2/C15orf48	17	1	ENSG00000006695	16	ENSG00000198804/ENSG00000112695/ENSG00000189043/ENSG00000198712/ENSG00000131143/ENSG00000164919/ENSG00000111775/ENSG00000176340/ENSG00000198938/ENSG00000135940/ENSG00000127184/ENSG00000166347/ENSG00000148290/ENSG00000126267/ENSG00000185633/ENSG00000166920
MF	GO:0001228	transcriptional activator activity, RNA polymerase II transcription regulatory region sequence-specific DNA binding	122/3507	346/14419	2.58459e-06	0.000313597	ENSG00000175592/ENSG00000163435/ENSG00000169136/ENSG00000124813/ENSG00000075426/ENSG00000204103/ENSG00000167074/ENSG00000185591/ENSG00000164463/ENSG00000106571/ENSG00000078900/ENSG00000124782/ENSG00000128272/ENSG00000119508/ENSG00000198807/ENSG00000179361/ENSG00000116604/ENSG00000204304/ENSG00000162599/ENSG00000118263/ENSG00000115966/ENSG00000102908/ENSG00000134317/ENSG00000137203/ENSG00000065978…	FOSL1/ELF3/ATF5/RUNX2/FOSL2/MAFB/TEF/SP1/CREBRF/GLI3/TP73/RREB1/ATF4/NR4A3/PAX9/ARID3B/MEF2D/PBX2/NFIA/KLF7/ATF2/NFAT5/GRHL1/TFAP2A/YBX1/FOXK2/HSF2/SREBF1/TP63/EGR1/HOXA1/FOS/ZBTB7B/NFE2L1/NR3C1/OVOL2/KLF5/CREB3L2/FOXO3/IRF1/RORA/EPAS1/USF1/SIX4/KLF13/ARID3A/HOXC13/SOX12/GATA3/FOXN1/BACH1/NFIC/IRF2/FOXD1/RBPJ/REL/EHF/PBX1/ETV6/ELF1/GRHL2/GLIS2/PLAG1/NR2C2/PPARA/ATF3/AKNA/ZNF467/VEZF1/DBP/FOXJ2/ML…	122	103	ENSG00000163435/ENSG00000124813/ENSG00000075426/ENSG00000167074/ENSG00000185591/ENSG00000164463/ENSG00000106571/ENSG00000078900/ENSG00000124782/ENSG00000198807/ENSG00000179361/ENSG00000116604/ENSG00000204304/ENSG00000162599/ENSG00000118263/ENSG00000115966/ENSG00000102908/ENSG00000134317/ENSG00000137203/ENSG00000141568/ENSG00000025156/ENSG00000072310/ENSG00000073282/ENSG00000120738/ENSG00000105991…	19	ENSG00000175592/ENSG00000169136/ENSG00000204103/ENSG00000128272/ENSG00000119508/ENSG00000065978/ENSG00000251493/ENSG00000162772/ENSG00000182759/ENSG00000129654/ENSG00000115844/ENSG00000135625/ENSG00000177606/ENSG00000092067/ENSG00000171786/ENSG00000129535/ENSG00000125492/ENSG00000125618/ENSG00000163132
MF	GO:0016675	oxidoreductase activity, acting on a heme group of donors	17/3507	25/14419	4.8263e-06	0.000494691	ENSG00000198804/ENSG00000112695/ENSG00000189043/ENSG00000198712/ENSG00000131143/ENSG00000164919/ENSG00000111775/ENSG00000176340/ENSG00000198938/ENSG00000135940/ENSG00000127184/ENSG00000166347/ENSG00000148290/ENSG00000126267/ENSG00000006695/ENSG00000185633/ENSG00000166920	MT-CO1/COX7A2/NDUFA4/MT-CO2/COX4I1/COX6C/COX6A1/COX8A/MT-CO3/COX5B/COX7C/CYB5A/SURF1/COX6B1/COX10/NDUFA4L2/C15orf48	17	1	ENSG00000006695	16	ENSG00000198804/ENSG00000112695/ENSG00000189043/ENSG00000198712/ENSG00000131143/ENSG00000164919/ENSG00000111775/ENSG00000176340/ENSG00000198938/ENSG00000135940/ENSG00000127184/ENSG00000166347/ENSG00000148290/ENSG00000126267/ENSG00000185633/ENSG00000166920
MF	GO:0003954	NADH dehydrogenase activity	26/3507	47/14419	4.98315e-06	0.000494691	ENSG00000198888/ENSG00000090266/ENSG00000198763/ENSG00000147684/ENSG00000189043/ENSG00000145494/ENSG00000168653/ENSG00000184983/ENSG00000099795/ENSG00000151366/ENSG00000125356/ENSG00000131495/ENSG00000140990/ENSG00000183648/ENSG00000119421/ENSG00000109390/ENSG00000004779/ENSG00000198840/ENSG00000164258/ENSG00000136521/ENSG00000170906/ENSG00000065518/ENSG00000165264/ENSG00000119013/ENSG00000166136…	MT-ND1/NDUFB2/MT-ND2/NDUFB9/NDUFA4/NDUFS6/NDUFS5/NDUFA6/NDUFB7/NDUFC2/NDUFA1/NDUFA2/NDUFB10/NDUFB1/NDUFA8/NDUFC1/NDUFAB1/MT-ND3/NDUFS4/NDUFB5/NDUFA3/NDUFB4/NDUFB6/NDUFB3/NDUFB8/NDUFV2	26	1	ENSG00000178127	25	ENSG00000198888/ENSG00000090266/ENSG00000198763/ENSG00000147684/ENSG00000189043/ENSG00000145494/ENSG00000168653/ENSG00000184983/ENSG00000099795/ENSG00000151366/ENSG00000125356/ENSG00000131495/ENSG00000140990/ENSG00000183648/ENSG00000119421/ENSG00000109390/ENSG00000004779/ENSG00000198840/ENSG00000164258/ENSG00000136521/ENSG00000170906/ENSG00000065518/ENSG00000165264/ENSG00000119013/ENSG00000166136
MF	GO:0016655	oxidoreductase activity, acting on NAD(P)H, quinone or similar compound as acceptor	29/3507	57/14419	1.2999e-05	0.00118291	ENSG00000198888/ENSG00000090266/ENSG00000198763/ENSG00000147684/ENSG00000189043/ENSG00000145494/ENSG00000168653/ENSG00000184983/ENSG00000099795/ENSG00000181019/ENSG00000151366/ENSG00000125356/ENSG00000131495/ENSG00000140990/ENSG00000183648/ENSG00000119421/ENSG00000169738/ENSG00000109390/ENSG00000004779/ENSG00000198840/ENSG00000164258/ENSG00000136521/ENSG00000170906/ENSG00000065518/ENSG00000165264…	MT-ND1/NDUFB2/MT-ND2/NDUFB9/NDUFA4/NDUFS6/NDUFS5/NDUFA6/NDUFB7/NQO1/NDUFC2/NDUFA1/NDUFA2/NDUFB10/NDUFB1/NDUFA8/DCXR/NDUFC1/NDUFAB1/MT-ND3/NDUFS4/NDUFB5/NDUFA3/NDUFB4/NDUFB6/NDUFB3/NDUFB8/NDUFV2/TP53I3	29	1	ENSG00000178127	28	ENSG00000198888/ENSG00000090266/ENSG00000198763/ENSG00000147684/ENSG00000189043/ENSG00000145494/ENSG00000168653/ENSG00000184983/ENSG00000099795/ENSG00000181019/ENSG00000151366/ENSG00000125356/ENSG00000131495/ENSG00000140990/ENSG00000183648/ENSG00000119421/ENSG00000169738/ENSG00000109390/ENSG00000004779/ENSG00000198840/ENSG00000164258/ENSG00000136521/ENSG00000170906/ENSG00000065518/ENSG00000165264…
MF	GO:0001046	core promoter sequence-specific DNA binding	36/3507	77/14419	1.45127e-05	0.00121907	ENSG00000185507/ENSG00000173575/ENSG00000164032/ENSG00000185591/ENSG00000143190/ENSG00000124782/ENSG00000076108/ENSG00000128272/ENSG00000118058/ENSG00000119508/ENSG00000163041/ENSG00000137203/ENSG00000100462/ENSG00000170345/ENSG00000147133/ENSG00000140836/ENSG00000133794/ENSG00000069667/ENSG00000008405/ENSG00000107485/ENSG00000196705/ENSG00000104872/ENSG00000170325/ENSG00000116717/ENSG00000115548…	IRF7/CHD2/H2AFZ/SP1/POU2F1/RREB1/BAZ2A/ATF4/KMT2A/NR4A3/H3F3A/TFAP2A/PRMT5/FOS/TAF1/ZFHX3/ARNTL/RORA/CRY1/GATA3/ZNF431/PIH1D1/PRDM10/GADD45A/KDM3A/ZNF277/NFYA/REST/SOX4/NR1D2/NRF1/CIART/PROX1/POU2AF1/PAX8/NRIP1	36	27	ENSG00000173575/ENSG00000185591/ENSG00000143190/ENSG00000124782/ENSG00000076108/ENSG00000118058/ENSG00000137203/ENSG00000170345/ENSG00000147133/ENSG00000140836/ENSG00000133794/ENSG00000069667/ENSG00000008405/ENSG00000107485/ENSG00000196705/ENSG00000170325/ENSG00000115548/ENSG00000198839/ENSG00000001167/ENSG00000084093/ENSG00000124766/ENSG00000174738/ENSG00000106459/ENSG00000159208/ENSG00000117707…	9	ENSG00000185507/ENSG00000164032/ENSG00000128272/ENSG00000119508/ENSG00000163041/ENSG00000100462/ENSG00000104872/ENSG00000116717/ENSG00000125618
MF	GO:0001077	transcriptional activator activity, RNA polymerase II proximal promoter sequence-specific DNA binding	87/3507	239/14419	1.75314e-05	0.0013393	ENSG00000175592/ENSG00000163435/ENSG00000124813/ENSG00000204103/ENSG00000167074/ENSG00000185591/ENSG00000106571/ENSG00000078900/ENSG00000128272/ENSG00000119508/ENSG00000179361/ENSG00000116604/ENSG00000162599/ENSG00000118263/ENSG00000115966/ENSG00000102908/ENSG00000134317/ENSG00000137203/ENSG00000065978/ENSG00000141568/ENSG00000072310/ENSG00000073282/ENSG00000120738/ENSG00000170345/ENSG00000160685…	FOSL1/ELF3/RUNX2/MAFB/TEF/SP1/GLI3/TP73/ATF4/NR4A3/ARID3B/MEF2D/NFIA/KLF7/ATF2/NFAT5/GRHL1/TFAP2A/YBX1/FOXK2/SREBF1/TP63/EGR1/FOS/ZBTB7B/NR3C1/KLF5/CREB3L2/IRF1/EPAS1/USF1/SIX4/KLF13/HOXC13/SOX12/GATA3/NFIC/FOXD1/RBPJ/EHF/PBX1/ETV6/ELF1/GLIS2/PLAG1/NR2C2/PPARA/AKNA/ZNF467/DBP/FOXJ2/MAFA/FOXJ1/ELK4/TFEB/ELF4/HIF1A/NR6A1/JUN/MEIS2/MEIS1/MTF1/POU2F3/SATB2/TFAP2C/SOX4/TBPL1/HOXA5/SOX2/NFIB/NRF1/TCF4/…	87	74	ENSG00000163435/ENSG00000124813/ENSG00000167074/ENSG00000185591/ENSG00000106571/ENSG00000078900/ENSG00000179361/ENSG00000116604/ENSG00000162599/ENSG00000118263/ENSG00000115966/ENSG00000102908/ENSG00000134317/ENSG00000137203/ENSG00000141568/ENSG00000072310/ENSG00000073282/ENSG00000120738/ENSG00000170345/ENSG00000160685/ENSG00000113580/ENSG00000102554/ENSG00000182158/ENSG00000125347/ENSG00000116016…	13	ENSG00000175592/ENSG00000204103/ENSG00000128272/ENSG00000119508/ENSG00000065978/ENSG00000251493/ENSG00000182759/ENSG00000129654/ENSG00000177606/ENSG00000092067/ENSG00000129535/ENSG00000125492/ENSG00000125618
MF	GO:0001047	core promoter binding	53/3507	129/14419	1.8397e-05	0.0013393	ENSG00000185507/ENSG00000173575/ENSG00000164032/ENSG00000185591/ENSG00000116560/ENSG00000143190/ENSG00000120071/ENSG00000124782/ENSG00000076108/ENSG00000128272/ENSG00000118058/ENSG00000119508/ENSG00000148400/ENSG00000163041/ENSG00000137203/ENSG00000100462/ENSG00000170345/ENSG00000147133/ENSG00000140836/ENSG00000113580/ENSG00000118689/ENSG00000133794/ENSG00000069667/ENSG00000008405/ENSG00000107485…	IRF7/CHD2/H2AFZ/SP1/SFPQ/POU2F1/KANSL1/RREB1/BAZ2A/ATF4/KMT2A/NR4A3/NOTCH1/H3F3A/TFAP2A/PRMT5/FOS/TAF1/ZFHX3/NR3C1/FOXO3/ARNTL/RORA/CRY1/GATA3/ZNF431/XBP1/PIH1D1/NKX3-1/E2F1/IRF9/PRDM10/ELK4/GADD45A/KDM3A/ZNF277/NFYA/KANSL1L/MTF1/EP300/REST/TFAP2C/SOX4/E2F2/NR1D2/NRF1/E2F8/CIART/MMP12/PROX1/POU2AF1/PAX8/NRIP1	53	39	ENSG00000173575/ENSG00000185591/ENSG00000143190/ENSG00000120071/ENSG00000124782/ENSG00000076108/ENSG00000118058/ENSG00000148400/ENSG00000137203/ENSG00000170345/ENSG00000147133/ENSG00000140836/ENSG00000113580/ENSG00000118689/ENSG00000133794/ENSG00000069667/ENSG00000008405/ENSG00000107485/ENSG00000196705/ENSG00000213928/ENSG00000170325/ENSG00000158711/ENSG00000115548/ENSG00000198839/ENSG00000001167…	14	ENSG00000185507/ENSG00000164032/ENSG00000116560/ENSG00000128272/ENSG00000119508/ENSG00000163041/ENSG00000100462/ENSG00000100219/ENSG00000104872/ENSG00000167034/ENSG00000101412/ENSG00000116717/ENSG00000262406/ENSG00000125618
MF	GO:0048185	activin binding	10/3507	12/14419	2.87803e-05	0.00196426	ENSG00000198742/ENSG00000134363/ENSG00000070404/ENSG00000135503/ENSG00000115170/ENSG00000114739/ENSG00000101665/ENSG00000106991/ENSG00000121989/ENSG00000069702	SMURF1/FST/FSTL3/ACVR1B/ACVR1/ACVR2B/SMAD7/ENG/ACVR2A/TGFBR3	10	8	ENSG00000198742/ENSG00000135503/ENSG00000115170/ENSG00000114739/ENSG00000101665/ENSG00000106991/ENSG00000121989/ENSG00000069702	2	ENSG00000134363/ENSG00000070404
MF	GO:0000987	proximal promoter sequence-specific DNA binding	129/3507	388/14419	3.65608e-05	0.00234849	ENSG00000175592/ENSG00000163435/ENSG00000101493/ENSG00000124813/ENSG00000143614/ENSG00000075426/ENSG00000204103/ENSG00000166949/ENSG00000164032/ENSG00000185591/ENSG00000134107/ENSG00000106571/ENSG00000147050/ENSG00000057657/ENSG00000078900/ENSG00000148737/ENSG00000128272/ENSG00000075624/ENSG00000119508/ENSG00000186350/ENSG00000179361/ENSG00000140455/ENSG00000116604/ENSG00000140396/ENSG00000162599…	FOSL1/ELF3/ZNF516/RUNX2/GATAD2B/FOSL2/MAFB/SMAD3/H2AFZ/SP1/BHLHE40/GLI3/KDM6A/PRDM1/TP73/TCF7L2/ATF4/ACTB/NR4A3/RXRA/ARID3B/USP3/MEF2D/NCOA2/NFIA/ZNF217/KLF7/HINFP/ATF2/NFAT5/GRHL1/NFIL3/TFAP2A/YBX1/KLF8/FOXK2/HSF2/SREBF1/TEAD1/BCL11A/SMAD5/FOS/AEBP2/MXD1/ZFHX3/ZBTB7B/NR3C1/KLF5/HES1/CREB3L2/IRF1/ARNTL/ZBTB7A/USF1/SIX4/KLF13/SNAI3/GATA3/VDR/NFIC/TBX3/FOXD1/RBPJ/EHF/DDN/PBX1/ETV6/ELF1/BHLHE41/RFX7…	129	107	ENSG00000163435/ENSG00000101493/ENSG00000124813/ENSG00000143614/ENSG00000075426/ENSG00000166949/ENSG00000185591/ENSG00000134107/ENSG00000106571/ENSG00000147050/ENSG00000078900/ENSG00000148737/ENSG00000186350/ENSG00000179361/ENSG00000140455/ENSG00000116604/ENSG00000140396/ENSG00000162599/ENSG00000171940/ENSG00000118263/ENSG00000172273/ENSG00000115966/ENSG00000102908/ENSG00000134317/ENSG00000165030…	22	ENSG00000175592/ENSG00000204103/ENSG00000164032/ENSG00000057657/ENSG00000128272/ENSG00000075624/ENSG00000119508/ENSG00000065978/ENSG00000135111/ENSG00000251493/ENSG00000181418/ENSG00000162772/ENSG00000182759/ENSG00000129654/ENSG00000177606/ENSG00000164379/ENSG00000172818/ENSG00000092067/ENSG00000129535/ENSG00000125618/ENSG00000275410/ENSG00000183734
MF	GO:0019843	rRNA binding	28/3507	57/14419	4.18538e-05	0.00253913	ENSG00000099622/ENSG00000125445/ENSG00000182810/ENSG00000132591/ENSG00000125691/ENSG00000163682/ENSG00000149273/ENSG00000110700/ENSG00000122406/ENSG00000170889/ENSG00000198034/ENSG00000142534/ENSG00000142676/ENSG00000161016/ENSG00000174547/ENSG00000231500/ENSG00000083845/ENSG00000145592/ENSG00000100316/ENSG00000164587/ENSG00000239789/ENSG00000181991/ENSG00000122034/ENSG00000179041/ENSG00000197498…	CIRBP/MRPS7/DDX28/ERAL1/RPL23/RPL9/RPS3/RPS13/RPL5/RPS9/RPS4X/RPS11/RPL11/RPL8/MRPL11/RPS18/RPS5/RPL37/RPL3/RPS14/MRPS17/MRPS11/GTF3A/RRS1/RPF2/FASTKD5/NOL12/UTP23	28	1	ENSG00000273899	27	ENSG00000099622/ENSG00000125445/ENSG00000182810/ENSG00000132591/ENSG00000125691/ENSG00000163682/ENSG00000149273/ENSG00000110700/ENSG00000122406/ENSG00000170889/ENSG00000198034/ENSG00000142534/ENSG00000142676/ENSG00000161016/ENSG00000174547/ENSG00000231500/ENSG00000083845/ENSG00000145592/ENSG00000100316/ENSG00000164587/ENSG00000239789/ENSG00000181991/ENSG00000122034/ENSG00000179041/ENSG00000197498…
MF	GO:0000978	RNA polymerase II proximal promoter sequence-specific DNA binding	125/3507	377/14419	5.50607e-05	0.00316454	ENSG00000175592/ENSG00000163435/ENSG00000124813/ENSG00000143614/ENSG00000075426/ENSG00000204103/ENSG00000166949/ENSG00000164032/ENSG00000185591/ENSG00000134107/ENSG00000106571/ENSG00000147050/ENSG00000057657/ENSG00000078900/ENSG00000148737/ENSG00000128272/ENSG00000075624/ENSG00000119508/ENSG00000186350/ENSG00000179361/ENSG00000140455/ENSG00000116604/ENSG00000140396/ENSG00000162599/ENSG00000171940…	FOSL1/ELF3/RUNX2/GATAD2B/FOSL2/MAFB/SMAD3/H2AFZ/SP1/BHLHE40/GLI3/KDM6A/PRDM1/TP73/TCF7L2/ATF4/ACTB/NR4A3/RXRA/ARID3B/USP3/MEF2D/NCOA2/NFIA/ZNF217/KLF7/HINFP/ATF2/NFAT5/GRHL1/NFIL3/TFAP2A/YBX1/KLF8/FOXK2/HSF2/SREBF1/BCL11A/SMAD5/FOS/AEBP2/MXD1/ZFHX3/ZBTB7B/NR3C1/KLF5/HES1/CREB3L2/IRF1/ARNTL/ZBTB7A/USF1/SIX4/KLF13/SNAI3/GATA3/VDR/NFIC/TBX3/FOXD1/RBPJ/EHF/DDN/PBX1/ETV6/ELF1/BHLHE41/RFX7/HOXA9/PLAG1/…	125	104	ENSG00000163435/ENSG00000124813/ENSG00000143614/ENSG00000075426/ENSG00000166949/ENSG00000185591/ENSG00000134107/ENSG00000106571/ENSG00000147050/ENSG00000078900/ENSG00000148737/ENSG00000186350/ENSG00000179361/ENSG00000140455/ENSG00000116604/ENSG00000140396/ENSG00000162599/ENSG00000171940/ENSG00000118263/ENSG00000172273/ENSG00000115966/ENSG00000102908/ENSG00000134317/ENSG00000165030/ENSG00000137203…	21	ENSG00000175592/ENSG00000204103/ENSG00000164032/ENSG00000057657/ENSG00000128272/ENSG00000075624/ENSG00000119508/ENSG00000065978/ENSG00000135111/ENSG00000251493/ENSG00000181418/ENSG00000162772/ENSG00000182759/ENSG00000129654/ENSG00000177606/ENSG00000164379/ENSG00000172818/ENSG00000092067/ENSG00000129535/ENSG00000125618/ENSG00000183734
MF	GO:0003713	transcription coactivator activity	100/3507	292/14419	7.51588e-05	0.00410367	ENSG00000163435/ENSG00000124151/ENSG00000178913/ENSG00000124496/ENSG00000164442/ENSG00000070444/ENSG00000130726/ENSG00000179833/ENSG00000171222/ENSG00000186260/ENSG00000273841/ENSG00000184384/ENSG00000152409/ENSG00000132341/ENSG00000116288/ENSG00000186350/ENSG00000111912/ENSG00000089280/ENSG00000116128/ENSG00000140396/ENSG00000107223/ENSG00000118263/ENSG00000172273/ENSG00000115966/ENSG00000083168…	ELF3/NCOA3/TAF7/TRERF1/CITED2/MNT/TRIM28/SERTAD2/SCAND1/MRTFB/TAF9/MAML2/JMY/RAN/PARK7/RXRA/NCOA7/FUS/BCL9/NCOA2/EDF1/KLF7/HINFP/ATF2/KAT6A/WDR77/MRTFA/TCF20/RUVBL1/TFAP2A/ABT1/ZBTB18/PPARGC1A/HSF2/ARID1B/PHF2/SRA1/CDK7/PIAS1/TAF1/SS18L1/WWC1/ARNT/PPARD/RORA/BCL9L/SOX12/GATA3/PER2/VDR/BCL10/ARID5B/NFKBIB/GTF2A2/RERE/SP4/NR2C2/PCBD1/USP21/PPARA/SMARCE1/LPIN1/MYSM1/SFR1/PPARGC1B/PMF1/JUN/HIPK2/NFE2…	100	76	ENSG00000163435/ENSG00000124151/ENSG00000124496/ENSG00000070444/ENSG00000179833/ENSG00000186260/ENSG00000184384/ENSG00000152409/ENSG00000186350/ENSG00000111912/ENSG00000116128/ENSG00000140396/ENSG00000118263/ENSG00000172273/ENSG00000115966/ENSG00000083168/ENSG00000196588/ENSG00000100207/ENSG00000137203/ENSG00000179456/ENSG00000109819/ENSG00000025156/ENSG00000049618/ENSG00000197724/ENSG00000134058…	24	ENSG00000178913/ENSG00000164442/ENSG00000130726/ENSG00000171222/ENSG00000273841/ENSG00000132341/ENSG00000116288/ENSG00000089280/ENSG00000107223/ENSG00000116455/ENSG00000175792/ENSG00000146109/ENSG00000213523/ENSG00000104825/ENSG00000140307/ENSG00000166228/ENSG00000156384/ENSG00000160783/ENSG00000177606/ENSG00000185668/ENSG00000166337/ENSG00000162227/ENSG00000129465/ENSG00000129535
MF	GO:0003682	chromatin binding	155/3507	495/14419	0.000195633	0.0101729	ENSG00000129194/ENSG00000008083/ENSG00000169136/ENSG00000124813/ENSG00000135365/ENSG00000143614/ENSG00000075426/ENSG00000166949/ENSG00000164032/ENSG00000141582/ENSG00000116560/ENSG00000164442/ENSG00000106571/ENSG00000147050/ENSG00000070444/ENSG00000057657/ENSG00000078900/ENSG00000130726/ENSG00000171988/ENSG00000100297/ENSG00000163961/ENSG00000132341/ENSG00000148737/ENSG00000166439/ENSG00000075624…	SOX15/JARID2/ATF5/RUNX2/PHF21A/GATAD2B/FOSL2/SMAD3/H2AFZ/CBX4/SFPQ/CITED2/GLI3/KDM6A/MNT/PRDM1/TP73/TRIM28/JMJD1C/MCM5/RNF168/RAN/TCF7L2/RNF169/ACTB/FOXO1/KMT2A/EZH1/RXRA/USP3/SSBP1/NOTCH1/H3F3A/NCOA2/PBX2/NFIA/PHF13/CDYL/AUTS2/HINFP/ATF2/NFAT5/SIN3A/MSL1/GRHL1/UXT/CIC/L3MBTL1/HIST1H3B/TFAP2A/YBX1/NCOA5/PPARGC1A/H1F0/HDAC7/SREBF1/TOP2A/TP63/EGR1/FMR1/SHMT2/ZMYND8/FOS/HMG20A/NELFE/CDC45/BAHCC1/OVO…	155	111	ENSG00000008083/ENSG00000124813/ENSG00000135365/ENSG00000143614/ENSG00000075426/ENSG00000166949/ENSG00000106571/ENSG00000147050/ENSG00000070444/ENSG00000078900/ENSG00000171988/ENSG00000163961/ENSG00000148737/ENSG00000166439/ENSG00000150907/ENSG00000118058/ENSG00000108799/ENSG00000186350/ENSG00000140455/ENSG00000148400/ENSG00000140396/ENSG00000204304/ENSG00000162599/ENSG00000116273/ENSG00000153046…	44	ENSG00000129194/ENSG00000169136/ENSG00000164032/ENSG00000141582/ENSG00000116560/ENSG00000164442/ENSG00000057657/ENSG00000130726/ENSG00000100297/ENSG00000132341/ENSG00000075624/ENSG00000106028/ENSG00000163041/ENSG00000126756/ENSG00000274267/ENSG00000065978/ENSG00000124160/ENSG00000182199/ENSG00000204356/ENSG00000093009/ENSG00000006712/ENSG00000106400/ENSG00000019549/ENSG00000101940/ENSG00000278828…
MF	GO:0046875	ephrin receptor binding	14/3507	24/14419	0.000381402	0.0189314	ENSG00000064999/ENSG00000143590/ENSG00000254087/ENSG00000243364/ENSG00000110395/ENSG00000184349/ENSG00000090776/ENSG00000158092/ENSG00000169242/ENSG00000097007/ENSG00000196396/ENSG00000164885/ENSG00000125266/ENSG00000197122	ANKS1A/EFNA3/LYN/EFNA4/CBL/EFNA5/EFNB1/NCK1/EFNA1/ABL1/PTPN1/CDK5/EFNB2/SRC	14	12	ENSG00000064999/ENSG00000143590/ENSG00000254087/ENSG00000243364/ENSG00000110395/ENSG00000184349/ENSG00000090776/ENSG00000158092/ENSG00000169242/ENSG00000097007/ENSG00000196396/ENSG00000197122	2	ENSG00000164885/ENSG00000125266
MF	GO:0005126	cytokine receptor binding	71/3507	207/14419	0.000738233	0.03505	ENSG00000136244/ENSG00000163739/ENSG00000163734/ENSG00000115009/ENSG00000172936/ENSG00000166949/ENSG00000081041/ENSG00000136688/ENSG00000136848/ENSG00000169429/ENSG00000121858/ENSG00000110514/ENSG00000087077/ENSG00000078747/ENSG00000104899/ENSG00000184349/ENSG00000164400/ENSG00000184990/ENSG00000198369/ENSG00000175505/ENSG00000102962/ENSG00000125538/ENSG00000105197/ENSG00000158813/ENSG00000107485…	IL6/CXCL1/CXCL3/CCL20/MYD88/SMAD3/CXCL2/IL36G/DAB2IP/CXCL8/TNFSF10/MADD/TRIP6/ITCH/AMH/EFNA5/CSF2/SIVA1/SPRED2/CLCF1/CCL22/IL1B/TIMM50/EDA/GATA3/IL23A/ADAM17/FEM1B/IL36RN/SMAD6/PDCL3/IL6R/PIK3R1/TRAF6/CSF3/SMAD7/BAMBI/ENG/LTB/IL1F10/INHBA/IL20/IL15/FRS2/CXCL6/TGFBR2/ITGA5/IFNL1/TNFSF9/LIFR/NTF3/CCL4L2/CX3CL1/TRAF5/CCL3L1/TGFBR3/IFNK/INHA/TNFSF13/LTA/IFNE/TGFB2/CCL4/DEFB1/NODAL/GDF6/BDNF/CCL26/CXC…	71	34	ENSG00000166949/ENSG00000136848/ENSG00000121858/ENSG00000110514/ENSG00000078747/ENSG00000184349/ENSG00000198369/ENSG00000102962/ENSG00000158813/ENSG00000107485/ENSG00000151694/ENSG00000169018/ENSG00000137834/ENSG00000160712/ENSG00000145675/ENSG00000175104/ENSG00000101665/ENSG00000106991/ENSG00000164136/ENSG00000166225/ENSG00000163513/ENSG00000161638/ENSG00000125657/ENSG00000113594/ENSG00000185652…	37	ENSG00000136244/ENSG00000163739/ENSG00000163734/ENSG00000115009/ENSG00000172936/ENSG00000081041/ENSG00000136688/ENSG00000169429/ENSG00000087077/ENSG00000104899/ENSG00000164400/ENSG00000184990/ENSG00000175505/ENSG00000125538/ENSG00000105197/ENSG00000110944/ENSG00000136695/ENSG00000115539/ENSG00000108342/ENSG00000095739/ENSG00000227507/ENSG00000136697/ENSG00000122641/ENSG00000162891/ENSG00000124875…
[truncated: 3 more rows]
